# Supplementary material for: The Protective Effects of L-Theanine against Epigallocatechin Gallate-Induced Acute Liver Injury in Mice
Source: MDPI journal article supplement (doi:10.3390/foods13071121), 2024-04-07
Supplement: s1 [file s1]

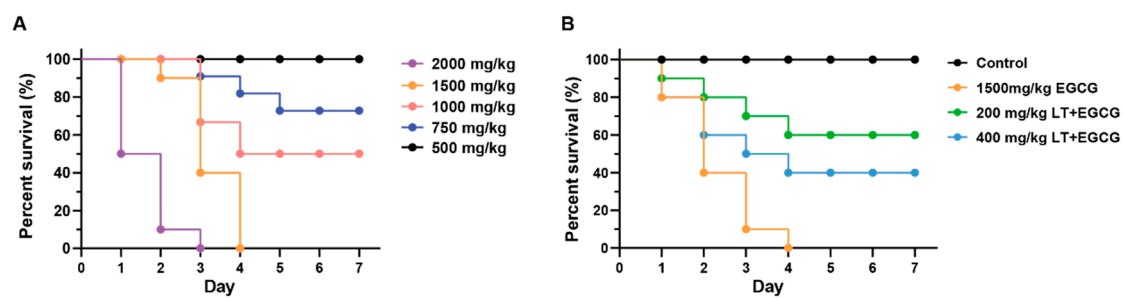

**Figure S2.** Survivorship curve of mice under different dosages of EGCG (A) and pretreatment of L-theanine (B)
