# Supplementary material for: The Protective Effects of L-Theanine against Epigallocatechin Gallate-Induced Acute Liver Injury in Mice
Source: Foods. 2024 Apr 7;13(7):1121. doi: 10.3390/foods13071121 (PMC11011850; doi:10.3390/foods13071121)
Supplement: Supplementary file 1 [file foods-13-01121-s001.zip]

Archive with 8 entries (8 files):
- Figure S1.pdf
- Figure S2.pdf
- Table S1 Primers.xlsx
- Table S2 DataPreprocessing_pos.xlsx
- Table S3 DataPreprocessing_neg.xlsx
- Table S4 E versus C.xlsx
- Table S5 LE versus E.xlsx
- Table S6 Intersection.xlsx
