# Supplementary material for: The Protective Effects of L-Theanine against Epigallocatechin Gallate-Induced Acute Liver Injury in Mice
Source: Foods. 2024 Apr 7;13(7):1121. doi: 10.3390/foods13071121 (PMC11011850; doi:10.3390/foods13071121)
Supplement: Supplementary file 1 [file foods-13-01121-s001.zip › Table S1 Primers.xlsx]

## Sheet: Sheet1
	Table S1. Primer sequences used for qPCR
	Target gene	Direction	Sequence (5' to 3')
	ACTB	Forward	GCTGAGAGGGAAATCGTGCGT
		Reverse	ACCGCTCGTTGCCAATAGTGA
	Nrf2	Forward	AAGCACAGCCAGCACATTCTCC
		Reverse	TGACCAGGACTCACGGGAACTTC
	HO-1	Forward	ACCGCCTTCCTGCTCAACATTG
		Reverse	CTCTGACGAAGTGACGCCATCTG
	NQO1	Forward	TCAGCCAATCAGCGTTCGGTATTAC
		Reverse	AGCCTCTACAGCAGCCTCCTTC
	GCLC	Forward	GCACATCTACCACGCAGTCAAGG
		Reverse	TCTCAAGAACATCGCCTCCATTCAG
	GCLM	Forward	TGTCTAAGAAGGCGGCTTGATGC
		Reverse	TGAGTCCAACTGAGCAGCAACAC
	GSTm1	Forward	CATCTCCTCACCCTCTTCCCAGTC
		Reverse	GGACAGACCTCAGTTCGCAGAAAC
	GSTm2	Forward	GAGAGACAGAGGAGGAGAGGATTCG
		Reverse	TCTCAAAGTCAGGGCTGTAGCAAAC
	TNF-α	Forward	ACGGCATGGATCTCAAAGAC
		Reverse	GTGGGTGAGGAGCACGTAGT
	IL-6	Forward	CTCCCAACAGACCTGTCTATAC
		Reverse	CCATTGCACAACTCTTTTCTCA
