# Supplementary material for: The Protective Effects of L-Theanine against Epigallocatechin Gallate-Induced Acute Liver Injury in Mice
Source: Foods. 2024 Apr 7;13(7):1121. doi: 10.3390/foods13071121 (PMC11011850; doi:10.3390/foods13071121)
Supplement: Supplementary file 1 [file foods-13-01121-s001.zip › Table S2 DataPreprocessing_pos.xlsx]

## Sheet: Sheet 1
Compound ID	Name	Formula	Molecular.Weight	Actual.RT	KEGG.ID	ID	HMDB.ID	mzVault.Best.Match	mzCloud.Best.Match	level	Super.class	Class	Sub.class	Pathway	QC_06	QC_07	QC_08	QC_09	QC_10	QC_11	QC_12	QC_13	QC_14	QC_15	QC_16	Con1	Con2	Con3	Con4	Con5	EGCG1	EGCG2	EGCG3	EGCG4	EGCG5	LT+EGCG1	LT+EGCG2	LT+EGCG3	LT+EGCG4	LT+EGCG5
0.589_338.0459	2-hydroxy-5-[3-(4-hydroxyphenyl)propanoyl]phenyl hydrogen sulfate	C15 H14 O7 S	338.046	0.589		S74853838	HMDB0135445			level4	Phenylpropanoids and polyketides	Linear 1,3-diarylpropanoids	Chalcones and dihydrochalcones		140469	153704	126758	166857	142890	157246	151867	144241	128979	137262	171722	413139	553605	470659	932655	2.07737e+06	178812	8994.71	100775	130888	155639	6653.93	20372.7	291710	54367	163961
0.595_395.1038		C19 H17 N5 O3 S	395.104	0.595						level5					536540	526972	459294	589747	487561	555486	525381	484859	559326	550004	485441	4.3512e+06	1.99724e+06	1.1915e+06	2.19471e+06	2.31846e+06	932279	65749.5	795905	938978	1.21093e+06	8310	27105.5	908342	33128.2	253091
0.621_319.3086	[similar to: ethyl caprate; δmass: 119.1309 da]		319.309	0.621						level5					39240.9	44427.5	24877.7	53909.3	34774.4	44026.9	38879.2	36678.5	42775.9	41690.1	33333.9	136987	295998	83327.1	27683.5	1.67295e+06	74044.1	125786	82844.5	186280	224876	67498.8	96998.8	210058	69861.8	93775.8
0.622_427.2215		C16 H38 N5 O2 P S2	427.221	0.622						level5					196596	201005	151106	218848	202615	194918	188583	198899	179665	188116	204862	331217	518346	1.07938e+06	1.00879e+06	858805	372698	227045	163767	325852	103871	1.93498e+06	3.006e+06	642126	585036	393241
0.623_274.2508		C16 H34 O3	274.251	0.623						level5					78215	77379.6	49728.3	75634.8	82965.2	70783.1	80612	74568.2	70231.5	78943.7	61833.7	257614	785658	110800	69673.1	6.03865e+06	130600	117732	104548	451673	260412	109887	130596	433442	155375	228559
0.624_254.058	Daidzein	C15 H10 O4	254.058	0.624	C10208	MReference-680	HMDB0003312		86.4	level2	Phenylpropanoids and polyketides	Isoflavonoids	Isoflav-2-enes		24441.6	27164.9	16598.3	29085.1	25137.4	23749.6	25024.4	25585.7	22747.6	25710.3	22211	3122.89	2719.25	3010.77	2636.49	2837.11	69929.9	3434.83	58436.5	72011.1	138202	2981.7	3067.13	3705.4	2265.84	4179.06
0.626_354.2075		C17 H30 N4 O2 S	354.207	0.626						level5					30930	47620.9	17651.2	42131.2	22456.7	29656.7	34199.9	25132.6	30187.2	36240.1	28615.3	125740	428084	43044.7	24141	3.02993e+06	37161.2	58523.9	48660	235720	114221	51523	59572.9	218554	75177.1	132803
0.628_403.2214		C20 H37 N O3 S2	403.221	0.628						level5					208369	208860	182933	223632	201919	204667	204657	204432	202149	210837	201489	241446	446263	865487	904289	789027	672924	165540	193755	536362	253534	2.06384e+06	3.74837e+06	634781	805371	499813
0.632_322.051	3-[3-(4-hydroxyphenyl)propanoyl]phenyl hydrogen sulfate	C15 H14 O6 S	322.051	0.632		S74853845	HMDB0135462			level4	Phenylpropanoids and polyketides	Linear 1,3-diarylpropanoids	Chalcones and dihydrochalcones		2.34004e+06	2.30672e+06	2.04142e+06	2.53704e+06	2.2038e+06	2.51159e+06	2.26282e+06	2.21774e+06	2.28801e+06	2.49829e+06	2.16741e+06	9.09934e+06	4.96422e+06	6.21033e+06	1.00667e+07	1.34577e+07	3.85087e+06	191470	2.52309e+06	3.22792e+06	3.99158e+06	44871.6	1.4531e+06	3.71107e+06	984928	3.05866e+06
0.633_339.0775		C15 H17 N O6 S	339.077	0.633						level5					1.21246e+06	1.17817e+06	1.08157e+06	1.40526e+06	1.13603e+06	1.25713e+06	1.18142e+06	1.14744e+06	1.28066e+06	1.22384e+06	1.1528e+06	4.6755e+06	2.46243e+06	3.09853e+06	5.25806e+06	6.6908e+06	2.08334e+06	103200	1.48782e+06	1.72215e+06	2.31904e+06	26484.1	790129	1.96828e+06	517317	1.52166e+06
0.634_242.0944	(s)-equol	C15 H14 O3	242.094	0.634	C14131	MReference-5832	HMDB0002209		90.5	level2	Phenylpropanoids and polyketides	Isoflavonoids	Isoflavans	NULL	1.09314e+06	1.20311e+06	927994	1.1691e+06	1.06194e+06	1.1579e+06	1.08268e+06	1.04233e+06	1.13582e+06	1.10514e+06	1.07671e+06	3.94148e+06	2.52131e+06	2.8496e+06	4.35616e+06	5.15592e+06	2.04492e+06	81661.4	1.28562e+06	1.60606e+06	1.94361e+06	6762.14	787401	2.01487e+06	503924	1.5022e+06
0.634_443.2918		C24 H47 N P2 S	443.292	0.634						level5					67121	66786	42383.3	55657	76033.6	69171.2	64174.4	52744.8	71398.6	67062.9	52096.1	286405	663618	131423	34533.5	4.72323e+06	116198	311876	159196	358567	579676	110949	221349	506680	97594.1	173996
0.638_363.3348		C21 H41 N5	363.335	0.638						level5					77388.1	144935	153305	119312	150833	74245.1	127194	78929.2	117628	121607	169820	214691	656062	127158	189159	6.411e+06	117341	199115	176265	578494	574648	142987	259876	444433	215194	211742
0.64_318.2769		C18 H38 O4	318.277	0.64						level5					160760	143247	161225	151964	152024	189648	120469	193069	144962	163042	143496	585851	1.64222e+06	872566	201653	1.32237e+07	212319	242374	348524	695858	477992	305039	248099	993503	329487	582776
0.641_415.2604		C19 H37 N5 O3 S	415.26	0.641						level5					75576.5	78667	75634	86110.3	77664.1	83837.4	80164.6	72578.6	89655.9	83235.3	70154.2	341468	1.04353e+06	165061	75836.9	9.72892e+06	111084	167649	136430	617385	363625	93332.7	174347	564261	172153	300605
0.653_487.3185		C26 H51 N O P2 S	487.318	0.653						level5					54478.1	42535.4	41090.1	60834.8	55102.4	48859.5	52247.6	49700.6	54968.8	51483.9	43995.6	277024	482243	98789.9	18840.1	3.80409e+06	80265.4	243551	110564	299284	457115	61292.7	184799	319136	58533.3	111099
0.656_407.3611		C23 H45 N5 O	407.361	0.656						level5					208616	208616	208616	208616	208616	208616	208616	208616	208616	208616	208616	254279	113847	391292	1.22236e+06	7.43937e+06	615197	20374.6	145147	222711	811847	310835	415070	139723	422797	1.14097e+06
0.657_459.2869	Deoxytubulosine	C29 H37 N3 O2	459.287	0.657	C11817	S144660				level4	Alkaloids	Alkaloids derived from tyrosine	Isoquinoline alkaloids		86507.7	73596.4	68338.9	103889	86309.4	80908.9	88804.2	92656.7	84534.4	92661.2	64383.9	644679	1.14586e+06	179290	51224.9	1.36598e+07	122755	174656	149570	708434	769278	136461	171326	718339	171990	396774
0.668_531.3449		C25 H51 N5 O3 P2	531.345	0.668						level5					28214.1	63691.4	53488.3	42159.9	49143.1	51222.5	48715.2	31793.1	57725.3	56890.7	38297.1	156269	267820	69720	87965.1	3.65725e+06	75642.3	184291	108840	371094	617430	71769.2	182920	210207	111578	149637
0.669_707.5034		C46 H65 N3 O3	707.503	0.669						level5					7.59788e+06	7.3487e+06	7.62859e+06	7.73457e+06	7.47803e+06	7.55772e+06	7.53414e+06	7.52708e+06	7.63003e+06	7.6059e+06	7.46621e+06	1.53154e+07	2.4257e+07	2.18558e+07	3.14252e+07	2.33964e+07	2.91297e+07	2.19271e+07	7.75629e+06	2.61047e+07	2.50138e+07	1.99879e+07	2.60056e+07	2.23085e+07	1.91118e+07	1.9704e+07
0.671_905.2515		C45 H52 Cl N5 O5 S4	905.251	0.671						level5					2.97921e+06	2.62665e+06	2.63326e+06	2.90813e+06	2.7442e+06	2.9144e+06	2.46248e+06	2.7055e+06	3.01525e+06	2.81479e+06	2.71253e+06	5.29174e+06	1.51143e+07	8.51579e+06	1.34539e+07	1.30243e+07	1.48508e+07	8.99885e+06	953170	1.17873e+07	1.30902e+07	1.35145e+07	1.25261e+07	1.54177e+07	1.41482e+07	1.27142e+07
0.672_665.361	Amphibine b	C39 H47 N5 O5	665.361	0.672	C09998	S4444903				level4				NULL	4.52134e+06	4.18139e+06	4.47206e+06	4.89932e+06	4.58716e+06	4.4777e+06	4.57275e+06	4.37192e+06	4.46925e+06	4.64874e+06	4.52346e+06	5.58197e+06	5.09525e+06	6.43939e+06	7.83364e+06	1.08379e+07	6.54543e+06	1.04285e+07	7.13936e+06	5.70795e+06	6.04868e+06	8.98962e+06	1.00192e+07	8.5769e+06	6.46554e+06	6.20813e+06
0.673_831.2328		C49 H42 Cl N5 S3	831.233	0.673						level5					1.12033e+07	1.01191e+07	1.11251e+07	1.10063e+07	1.07361e+07	1.10656e+07	1.05961e+07	1.07052e+07	1.07523e+07	1.16728e+07	1.03462e+07	1.99707e+07	5.79883e+07	4.73526e+07	6.297e+07	6.50738e+07	5.98627e+07	4.37186e+07	5.68794e+06	4.70143e+07	5.9035e+07	5.47377e+07	5.8457e+07	6.87919e+07	6.51281e+07	5.77582e+07
0.674_614.3606	Toxiferine i	C40 H46 N4 O2	614.361	0.674	C09246	S4444760				level4	Alkaloids	Alkaloids derived from tryptophan and anthranilic acid	Indole alkaloids	NULL	3.41025e+06	3.17943e+06	3.09679e+06	3.3806e+06	3.79652e+06	3.32408e+06	3.42298e+06	3.01916e+06	3.3078e+06	3.58592e+06	3.42453e+06	5.72449e+06	1.59473e+07	1.93958e+07	1.40367e+07	1.66768e+07	1.62433e+07	1.19279e+07	9.96849e+06	1.47202e+07	1.70558e+07	1.43467e+07	2.01379e+07	1.20918e+07	1.50695e+07	1.51255e+07
0.674_757.2129		C46 H36 Cl N5 S2	757.213	0.674						level5					4.20253e+07	3.84385e+07	4.10876e+07	4.17414e+07	3.99302e+07	4.07679e+07	4.07772e+07	4.04959e+07	3.9017e+07	4.22722e+07	4.06786e+07	6.3995e+07	2.11266e+08	2.1392e+08	2.51041e+08	2.38041e+08	2.03232e+08	2.04967e+08	3.18613e+07	1.67517e+08	2.06111e+08	2.07196e+08	2.30714e+08	2.65535e+08	2.44205e+08	1.96442e+08
0.674_933.633		C56 H87 N O10	933.633	0.674						level5					8.42268e+06	7.88826e+06	6.95305e+06	8.50099e+06	7.82381e+06	8.06396e+06	8.04906e+06	7.27849e+06	8.23602e+06	7.98043e+06	8.02133e+06	8.00809e+06	1.55288e+07	2.05876e+07	2.12112e+07	2.38491e+07	1.78299e+07	2.13052e+07	2.08961e+07	1.61994e+07	2.35475e+07	2.00399e+07	1.61252e+07	2.21682e+07	2.14574e+07	1.78092e+07
0.675_631.3874		C31 H59 N3 O6 P2	631.387	0.675						level5					1.87782e+06	1.63009e+06	1.64015e+06	1.82728e+06	2.03928e+06	1.79423e+06	1.81335e+06	1.56565e+06	1.88512e+06	1.88488e+06	1.79668e+06	2.92114e+06	9.33903e+06	1.07712e+07	8.7378e+06	9.42285e+06	9.60332e+06	6.18718e+06	5.83821e+06	8.79083e+06	9.06396e+06	7.8701e+06	1.13171e+07	7.16417e+06	8.953e+06	9.04604e+06
0.675_679.472		C42 H66 N O4 P	679.472	0.675						level5					9.77219e+07	7.04601e+07	9.89668e+07	1.0452e+08	1.018e+08	1.06397e+08	8.63287e+07	7.53388e+07	9.98395e+07	9.75104e+07	1.03336e+08	2.36738e+08	6.1237e+08	5.74847e+08	5.87941e+08	5.00792e+08	2.31213e+08	4.62759e+08	1.04273e+08	4.28026e+08	5.91425e+08	5.03185e+08	5.10838e+08	5.73989e+08	4.2823e+08	5.08809e+08
0.675_683.1945		C44 H30 Cl N3 O3	683.194	0.675						level5					5.18749e+07	5.28287e+07	4.78013e+07	5.45777e+07	5.16533e+07	5.16773e+07	5.18643e+07	5.07389e+07	5.24061e+07	5.09378e+07	5.24292e+07	5.57596e+07	2.39802e+08	2.77943e+08	3.34565e+08	2.99963e+08	2.76993e+08	2.31951e+08	4.80454e+07	1.9377e+08	2.52161e+08	2.53465e+08	2.90528e+08	2.94291e+08	3.14614e+08	2.46031e+08
0.676_553.4346		C36 H59 N O S	553.435	0.676						level5					1.42926e+06	2.08057e+06	1.60012e+06	1.58407e+06	1.81628e+06	1.66753e+06	1.79632e+06	1.62002e+06	1.53373e+06	1.68844e+06	1.84148e+06	2.32727e+06	6.20349e+06	1.04037e+07	6.03254e+06	7.40429e+06	6.31006e+06	1.01953e+07	2.79981e+06	4.15072e+06	6.06467e+06	7.89451e+06	8.14531e+06	1.33834e+07	6.90841e+06	1.21835e+07
0.676_609.1764		C37 H28 Cl N5 S	609.176	0.676						level5					2.66371e+07	2.51138e+07	2.69817e+07	2.96234e+07	2.60007e+07	2.67629e+07	2.77648e+07	2.34969e+07	2.76236e+07	2.68487e+07	2.84481e+07	4.91014e+07	1.78369e+08	2.00581e+08	1.93563e+08	1.73898e+08	2.1049e+08	1.26746e+08	2.44441e+07	1.70733e+08	1.84578e+08	1.80341e+08	1.84977e+08	1.98531e+08	1.95677e+08	1.48109e+08
0.676_681.5315		C35 H75 N3 O7 S	681.532	0.676						level5					2.03389e+06	2.29815e+06	2.10847e+06	2.16081e+06	2.43095e+06	2.14057e+06	2.22533e+06	1.88914e+06	1.92013e+06	2.86415e+06	2.13711e+06	1.92441e+06	2.39695e+06	1.06875e+07	3.15921e+06	3.82732e+06	1.35629e+07	1.06292e+07	2.18919e+06	1.40598e+07	9.80331e+06	2.17167e+07	8.86905e+06	9.32396e+06	2.74696e+07	5.94732e+06
0.676_683.549		C38 H73 N3 O7	683.549	0.676						level5					4.72669e+06	5.38491e+06	4.52643e+06	5.08106e+06	4.85903e+06	4.97448e+06	4.86211e+06	4.87505e+06	4.56675e+06	5.28096e+06	4.93218e+06	5.76357e+06	6.94686e+06	2.55455e+07	1.13342e+07	1.3152e+07	2.51754e+07	2.43464e+07	5.38116e+06	2.13442e+07	2.09798e+07	2.78463e+07	1.50835e+07	1.8241e+07	4.36359e+07	1.4289e+07
0.676_687.5787		C43 H77 N O5	687.579	0.676						level5					143579	149349	127721	132385	156098	140953	140548	143283	141516	137439	143729	99258.7	60212.5	700688	257779	146394	3.40696e+06	565159	156619	1.51773e+06	3.85377e+06	469867	440547	203189	1.46166e+06	1.28936e+06
0.677_535.1591			535.159	0.677						level5					7.91572e+07	7.83359e+07	7.6834e+07	7.9543e+07	7.92797e+07	7.85382e+07	8.1376e+07	6.45984e+07	8.24533e+07	8.04016e+07	8.47487e+07	1.85019e+08	9.6429e+08	1.0388e+09	9.0063e+08	8.70744e+08	1.0172e+09	6.00479e+08	1.1535e+08	9.42187e+08	9.34052e+08	9.70361e+08	8.47042e+08	8.91037e+08	9.90605e+08	8.66464e+08
0.677_577.4346		C34 H59 N O6	577.435	0.677						level5					937658	1.0419e+06	860808	867469	1.09684e+06	965098	984433	830338	956662	1.03815e+06	972488	1.79146e+06	3.56257e+06	4.03736e+06	5.54519e+06	4.53872e+06	3.16544e+06	4.91827e+06	1.87653e+06	2.27679e+06	3.56085e+06	4.36964e+06	8.1215e+06	5.87788e+06	4.08325e+06	5.24793e+06
0.677_620.3029		C33 H50 O7 P2	620.303	0.677						level5					8.4191e+07	9.9999e+07	8.60089e+07	1.02461e+08	9.06536e+07	9.31529e+07	9.42864e+07	7.852e+07	1.00628e+08	9.35424e+07	9.44611e+07	1.21519e+08	2.46837e+08	3.13761e+08	3.83066e+08	4.86606e+08	3.0593e+08	3.52941e+08	2.02059e+08	2.11125e+08	2.91791e+08	4.5187e+08	4.70838e+08	3.6299e+08	3.34448e+08	3.45634e+08
0.677_662.4459		C42 H63 O4 P	662.446	0.677						level5					2.01346e+08	1.74282e+08	1.89104e+08	1.85997e+08	2.0002e+08	1.92975e+08	1.91886e+08	1.72102e+08	2.04325e+08	1.8844e+08	1.92429e+08	4.59823e+08	1.10771e+09	1.06373e+09	1.2847e+09	9.78122e+08	1.03787e+09	8.73247e+08	2.38165e+08	1.0013e+09	1.33463e+09	9.5261e+08	1.18791e+09	9.89056e+08	1.06692e+09	1.02515e+09
0.677_800.5442		C45 H79 N4 O2 P3	800.544	0.677						level5					2.20887e+06	1.88951e+06	1.7104e+06	2.20642e+06	2.20269e+06	1.99404e+06	1.94912e+06	2.2567e+06	2.29668e+06	1.58455e+06	2.13511e+06	1.95354e+07	1.95456e+07	4.23887e+07	2.99439e+07	4.35405e+07	2.92255e+07	3.43069e+07	1.96189e+07	2.24889e+07	2.81594e+07	5.06425e+07	3.16624e+07	2.2209e+07	2.24617e+07	2.01754e+07
0.678_657.5333		C41 H71 N O5	657.533	0.678						level5					1.38743e+06	1.61993e+06	1.25392e+06	1.48548e+06	1.44721e+06	1.44577e+06	1.41637e+06	1.41911e+06	1.40312e+06	1.45291e+06	1.4627e+06	1.2781e+06	1.89978e+06	1.24598e+07	2.43513e+06	4.3419e+06	9.278e+06	8.60479e+06	1.9803e+06	7.41116e+06	1.02849e+07	1.24058e+07	6.33326e+06	6.85793e+06	2.27495e+07	6.84241e+06
0.678_685.5632		C37 H76 N5 O4 P	685.563	0.678						level5					1.07944e+06	1.15925e+06	1.0167e+06	1.21949e+06	1.0817e+06	1.11289e+06	1.08817e+06	1.12895e+06	1.0642e+06	1.19957e+06	1.05809e+06	1.42137e+06	1.43952e+06	7.39889e+06	2.40441e+06	3.80276e+06	1.07217e+07	6.13487e+06	1.30677e+06	8.66482e+06	1.05028e+07	7.88755e+06	4.0006e+06	4.13225e+06	1.64684e+07	7.16365e+06
0.679_423.3555		C23 H45 N5 O2	423.356	0.679						level5					1.84874e+06	1.3485e+06	1.70889e+06	1.77939e+06	2.6152e+06	2.22825e+06	1.49363e+06	1.53897e+06	2.06943e+06	2.34759e+06	1.50711e+06	211741	1.08831e+06	7.31475e+06	4.33729e+06	8.87669e+06	1.40743e+07	3.63037e+06	4.1484e+06	5.36082e+06	200041	6.82215e+06	1.07005e+07	235666	2.95705e+06	5.00438e+06
0.679_669.3019		C35 H50 N3 O4 P3	669.302	0.679						level5					317690	232298	274834	312840	291217	304773	267520	238886	279211	333079	289773	432427	423618	617723	692101	860832	909001	1.56143e+06	1.88248e+06	768761	1.6226e+06	592592	1.82346e+06	456251	1.73085e+06	529900
0.679_697.4908		C42 H67 N O7	697.491	0.679						level5					4.78548e+06	4.78548e+06	4.78548e+06	4.78548e+06	4.78548e+06	4.78548e+06	4.78548e+06	4.78548e+06	4.78548e+06	4.78548e+06	4.78548e+06	8.60024e+06	1.77567e+07	1.8118e+07	1.91325e+07	2.77553e+07	2.74058e+07	1.6866e+07	6.78661e+06	1.98695e+07	2.51318e+07	2.1635e+07	2.4518e+07	2.17428e+07	1.44728e+07	2.88951e+07
0.68_646.4513		C38 H59 N6 O P	646.451	0.68						level5					2.89972e+06	2.35486e+06	2.74078e+06	3.27138e+06	2.7761e+06	2.70492e+06	3.50759e+06	3.10344e+06	2.75738e+06	2.02652e+06	3.24685e+06	6.85602e+06	1.3722e+07	1.30918e+07	1.23374e+07	1.34391e+07	9.40675e+06	9.92053e+06	1.70245e+06	1.2638e+07	1.79741e+07	2.04295e+07	9.41939e+06	1.00653e+07	1.11074e+07	1.03252e+07
0.681_585.5124		C32 H68 N5 O2 P	585.512	0.681						level5					1.06032e+06	1.06523e+06	1.04934e+06	898271	1.02898e+06	1.0382e+06	1.01343e+06	946076	1.12389e+06	974311	1.04374e+06	1.81487e+06	3.26749e+06	4.99813e+06	2.0334e+06	3.33653e+06	3.12298e+06	3.65024e+06	454123	2.0272e+06	3.90564e+06	8.43385e+06	9.55228e+06	2.76725e+06	4.65179e+06	4.0001e+06
0.681_609.5115		C34 H68 N5 O2 P	609.511	0.681						level5					670030	603563	579062	764310	779772	594174	605549	845607	572135	653041	670858	1.63323e+06	2.91226e+06	6.37262e+06	7.74322e+06	5.50059e+06	2.48222e+06	1.35099e+06	367625	1.63115e+06	3.0628e+06	7.70317e+06	1.51132e+07	2.43432e+06	3.3402e+06	2.94996e+06
0.682_632.5015		C40 H64 N4 O2	632.501	0.682						level5					158118	125036	149329	149123	167624	149734	155714	124357	154078	151842	159478	133235	370128	308785	122392	121450	495680	419691	133577	407806	493399	1.31023e+06	565425	735800	504315	844026
0.682_661.5652		C35 H76 N5 O4 P	661.565	0.682						level5					3.48708e+06	4.02172e+06	3.10871e+06	3.50577e+06	3.87192e+06	3.37207e+06	3.61686e+06	3.35949e+06	3.62389e+06	3.62668e+06	3.63222e+06	4.58722e+06	6.32048e+06	2.1892e+07	6.47868e+06	1.17439e+07	2.87077e+07	1.73772e+07	3.2349e+06	2.38755e+07	3.72368e+07	2.4457e+07	1.07712e+07	1.36378e+07	4.62309e+07	1.69773e+07
0.683_503.3136		C24 H46 N3 O6 P	503.314	0.683						level5					1.17171e+06	1.39172e+06	772633	772813	1.65994e+06	1.49527e+06	1.03021e+06	1.27383e+06	913553	1.20353e+06	1.13973e+06	1.86761e+06	619775	3.58629e+06	975481	5.51634e+06	207882	49107.6	1.24665e+06	305272	1.34079e+06	1.18274e+06	656300	883854	49813.6	260638
0.683_585.4311			585.431	0.683						level5					1.13049e+06	1.13272e+06	912718	1.34517e+06	1.04996e+06	1.12162e+06	1.09249e+06	1.09173e+06	1.12675e+06	1.09432e+06	1.11283e+06	1.56204e+06	5.25271e+06	4.81593e+06	1.07727e+07	6.41471e+06	6.95474e+06	2.84668e+06	1.56309e+06	4.79748e+06	6.67516e+06	3.19899e+06	5.84473e+06	4.12572e+06	4.83136e+06	4.43425e+06
0.686_588.3906		C32 H60 O5 S2	588.391	0.686						level5					1.62012e+06	1.39238e+06	1.25251e+06	1.12805e+06	1.64605e+06	1.43335e+06	1.39459e+06	1.18271e+06	1.37435e+06	1.54161e+06	1.47017e+06	5.70353e+06	1.29932e+07	1.30927e+07	1.28042e+07	5.92146e+06	2.1309e+07	1.13407e+07	1.21789e+06	1.3941e+07	2.51416e+07	1.23363e+07	6.77743e+06	1.29916e+07	1.6494e+07	1.97751e+07
0.686_669.4605		C36 H69 N3 O2 P2 S	669.461	0.686						level5					4.29693e+06	4.9589e+06	3.70344e+06	5.49774e+06	3.99461e+06	4.53381e+06	6.5387e+06	3.16899e+06	4.22047e+06	4.66554e+06	5.14755e+06	1.35946e+07	3.24849e+06	3.3357e+06	5.21083e+06	5.28899e+06	5.17925e+06	3.28023e+06	5.0812e+06	1.17481e+07	1.36161e+07	3.58741e+06	8.26544e+06	4.58003e+06	7.00378e+06	5.16017e+06
0.687_390.277	Bis(2-ethylhexyl) phthalate	C24 H38 O4	390.277	0.687	C03690	S21106505				level4				NULL	265207	216416	225596	118960	109973	236497	200788	156984	217313	169076	185340	305829	335703	188005	257467	305259	236111	262646	182158	105604	109837	230641	328548	244122	333054	307481
0.687_422.3398		C27 H42 N4	422.34	0.687						level5					132629	128687	123273	158312	154330	111384	129416	151386	143868	117678	141633	169883	2.17478e+06	522250	879040	1.61013e+06	535697	290572	95684.7	381351	116731	922563	157749	347316	189800	159029
0.687_653.3245	Ro-32-2175	C37 H43 N5 O6	653.324	0.687	C15661	S405782				level4					5.74405e+06	5.16817e+06	4.97013e+06	5.86163e+06	5.62764e+06	5.41933e+06	5.3593e+06	5.56737e+06	5.75132e+06	5.21395e+06	5.37722e+06	1.44308e+07	6.11611e+06	4.50582e+06	5.62992e+06	1.21061e+07	5.62617e+06	8.28011e+06	5.1868e+06	4.62029e+06	5.25748e+06	1.04862e+07	2.36862e+07	8.00278e+06	6.43234e+06	1.10647e+07
0.688_488.3874	(1s,2r,3r,5z,7e)-2-(4-hydroxybutyl)-9,10-secocholesta-5,7,10-triene-1,3,25-triol	C31 H52 O4	488.387	0.688		S7826544				level4					405588	355397	417470	472846	420296	396173	408427	423710	394836	382219	443786	214428	4.26803e+06	2.49657e+06	2.94362e+06	4.92453e+06	1.42335e+06	1.36153e+06	103067	870622	745824	4.14725e+06	8.97944e+06	1.64263e+06	1.3251e+06	1.88191e+06
0.688_599.4918		C32 H66 N5 O3 P	599.492	0.688						level5					3.31437e+06	2.95715e+06	2.8148e+06	3.19851e+06	3.25421e+06	3.15361e+06	3.09222e+06	2.89065e+06	3.4115e+06	3.00005e+06	3.10589e+06	5.16136e+06	1.20853e+07	1.26946e+07	1.55308e+07	1.4206e+07	9.68916e+06	9.22324e+06	3.41541e+06	7.67242e+06	1.20986e+07	1.53171e+07	2.73057e+07	2.79726e+07	1.54872e+07	2.55763e+07
0.688_651.5433		C33 H74 N5 O5 P	651.543	0.688						level5					105513	128259	115673	128443	149036	81491.6	132602	93012.7	117999	137198	132779	88472.1	732327	498765	94352.6	112434	322035	327269	74108.8	254707	373510	1.35992e+06	446151	904799	202165	881181
0.689_453.3823		C27 H51 N O4	453.382	0.689						level5					1.1539e+06	1.05859e+06	1.01673e+06	1.1749e+06	1.16742e+06	1.11164e+06	1.12474e+06	1.03091e+06	1.1506e+06	1.09118e+06	1.15419e+06	736525	978554	2.13094e+06	1.64729e+06	1.3422e+06	3.97139e+06	4.44305e+06	1.74727e+06	2.64346e+06	3.35751e+06	2.59284e+07	1.91704e+07	5.51181e+06	8.49293e+06	4.8881e+06
0.689_636.2979		C34 H46 N4 O4 P2	636.298	0.689						level5					6.52178e+06	5.89653e+06	5.78502e+06	6.7194e+06	6.39723e+06	6.20185e+06	6.13152e+06	6.36073e+06	6.54247e+06	6.03418e+06	6.13233e+06	1.63083e+07	7.02952e+06	5.05618e+06	6.5478e+06	1.35012e+07	6.405e+06	9.5934e+06	6.12927e+06	5.36693e+06	6.20628e+06	1.20388e+07	2.78727e+07	9.05918e+06	7.65208e+06	1.22844e+07
0.69_285.2172		C13 H27 N5 O2	285.217	0.69						level5					6.72474e+06	5.76822e+06	6.06261e+06	8.73728e+06	7.02298e+06	4.56441e+06	7.50886e+06	6.71544e+06	4.42337e+06	6.59262e+06	9.25412e+06	1.46357e+07	6.08944e+07	5.3474e+07	6.59793e+07	7.11082e+07	2.30267e+07	1.9919e+07	6.51885e+06	2.36199e+07	2.88832e+07	4.67515e+07	6.21308e+07	5.43672e+07	3.90433e+07	5.45093e+07
0.691_466.2723		C25 H44 N2 P2 S	466.272	0.691						level5					1.44083e+06	1.51982e+06	1.36755e+06	1.94018e+06	1.46017e+06	1.46747e+06	1.61006e+06	1.33421e+06	1.5793e+06	1.53014e+06	1.60959e+06	2.95815e+06	4.86774e+06	7.28579e+06	4.66945e+06	5.22896e+06	5.30019e+06	4.45515e+06	4.63778e+06	5.26132e+06	5.79575e+06	5.51207e+06	6.31073e+06	4.42553e+06	4.30957e+06	4.98637e+06
0.691_693.5533		C42 H71 N5 O3	693.553	0.691						level5					69631.4	76191	66374.4	63644.8	91418.2	70909.7	78824.2	57168.2	52973.8	108322	76648.3	24666.8	46744.5	57110.6	71020	62537.8	76161	98385.9	49967.5	54259.2	72300	1.35718e+06	1.25555e+06	389769	341530	846337
0.693_408.3241	2-{[(hexadecyloxy)(hydroxy)phosphoryl]oxy}-n,n,n-trimethylethanaminium	C21 H47 N O4 P	408.324	0.693		S3474				level4					3.21988e+06	2.49503e+06	3.18659e+06	3.21907e+06	3.05203e+06	3.33294e+06	2.87497e+06	2.76917e+06	3.02232e+06	3.08684e+06	3.2377e+06	1.48532e+06	5.12205e+06	5.99944e+06	4.64699e+06	5.32567e+06	1.0107e+07	1.20792e+07	5.82328e+06	7.19036e+06	7.29722e+06	7.21914e+07	4.41104e+07	1.84521e+07	1.84454e+07	1.48938e+07
0.693_451.3671		C21 H50 N5 O3 P	451.367	0.693						level5					2.76033e+06	2.93024e+06	2.62107e+06	2.82627e+06	2.84359e+06	2.79674e+06	2.78988e+06	2.78483e+06	2.83581e+06	2.6999e+06	2.85546e+06	2.53102e+06	4.4312e+06	7.48641e+06	1.26388e+07	9.08118e+06	7.12728e+06	7.39203e+06	5.0505e+06	5.66571e+06	7.4619e+06	1.33159e+07	1.68991e+07	1.01702e+07	1.09736e+07	1.29386e+07
0.694_386.261		C22 H35 N4 P	386.261	0.694						level5					112030	119021	99297.1	116055	97284.9	121763	105570	124808	114674	103049	100898	22494.3	101700	49511.2	47164.8	42043.1	616752	376584	246109	586366	490460	51213.2	955107	57102.9	154551	102603
0.694_495.4137		C27 H53 N5 O3	495.414	0.694						level5					599350	438095	684894	333370	423096	577312	352615	552427	408485	457755	615291	1.05361e+06	196227	266515	1.24947e+06	2.61983e+06	4.56183e+06	84546	68021.3	137362	313907	2.60245e+06	2.17306e+06	2.30946e+06	783176	190463
0.694_665.5228		C38 H72 N3 O4 P	665.523	0.694						level5					81511	77911.3	59283.7	106006	87666.6	78102.7	79602.1	77103.1	78160.6	88391.7	78473.7	80614	140116	75174.7	77292.1	76763	193832	112269	41504.2	53733.3	69262.9	968188	402675	383661	85981.6	394910
0.695_449.3508		C28 H43 N5	449.351	0.695						level5					1.81222e+06	1.69673e+06	1.77693e+06	1.99123e+06	1.84224e+06	1.79863e+06	1.85885e+06	1.66302e+06	1.8226e+06	1.85901e+06	1.8818e+06	1.70251e+06	3.20135e+06	4.05228e+06	5.51216e+06	5.33636e+06	4.69747e+06	4.16691e+06	3.75939e+06	3.86225e+06	5.70055e+06	1.15451e+07	1.38058e+07	9.95479e+06	7.94143e+06	9.10736e+06
0.695_497.3512		C32 H43 N5	497.351	0.695						level5					552224	511670	508304	561572	571945	535659	536354	536430	545622	519788	555824	693294	910581	1.3253e+06	3.13978e+06	2.53608e+06	1.27098e+06	1.16775e+06	998302	866421	1.51732e+06	2.57631e+06	3.97023e+06	1.94421e+06	1.95033e+06	2.32932e+06
0.695_530.2678	Glycerol phenylbutyrate	C33 H38 O6	530.268	0.695		S8657541				level4					2.20914e+07	2.12096e+07	2.11141e+07	2.23456e+07	2.15327e+07	2.16671e+07	2.16417e+07	2.16814e+07	2.15515e+07	2.16929e+07	2.16913e+07	3.8338e+07	5.21378e+07	5.19795e+07	6.14304e+07	7.47975e+07	7.77713e+07	6.3539e+07	6.41113e+07	6.17121e+07	8.3873e+07	5.98001e+07	8.40808e+07	6.81484e+07	5.50989e+07	7.87942e+07
0.695_575.3251		C34 H46 N3 O3 P	575.325	0.695						level5					1.06144e+06	980923	969000	1.10777e+06	1.06822e+06	1.16184e+06	1.00005e+06	961028	1.1292e+06	1.01374e+06	1.06015e+06	1.77799e+06	2.46857e+06	2.50168e+06	2.54715e+06	3.18365e+06	2.88787e+06	2.39721e+06	2.29036e+06	2.59576e+06	3.16978e+06	2.36454e+06	2.76419e+06	2.86599e+06	2.04928e+06	2.77303e+06
0.695_747.3647		C35 H57 N O16	747.365	0.695						level5					88123.7	88316.8	90700.9	95013	89523.3	90060.3	90425.8	86410.6	91750.4	93608.4	88463	175918	2.21036e+07	367472	355666	339672	331011	280565	116943	295790	355301	356450	406971	406039	387678	330619
0.697_462.3713		C29 H50 O4	462.371	0.697						level5					842115	908250	837176	878504	855792	863987	864579	863908	847150	892818	852324	887668	4.04799e+06	3.82122e+06	4.66968e+06	6.17927e+06	2.56431e+06	2.26801e+06	1.37596e+06	2.46928e+06	2.43379e+06	3.92638e+06	2.56131e+06	2.62038e+06	3.04862e+06	2.96651e+06
0.697_519.2762		C28 H43 Cl N3 O2 P	519.276	0.697						level5					117142	97819	82146.4	115232	115267	114913	99537.4	103154	87950.9	109283	121393	78778.4	170789	730242	161522	169622	168245	44250.3	269909	271559	184734	144125	103324	51174.2	210920	482147
0.697_94.0421	Benzenol	C6 H6 O	94.0421	0.697	C00146	S971	HMDB0000228			level4	Benzenoids	Phenols	1-hydroxy-4-unsubstituted benzenoids	map00350 Tyrosine metabolism; map01100 Metabolic pathways; map04974 Protein digestion and absorption;	890512	828377	784295	838398	805978	827128	830916	705557	1.00338e+06	779844	841936	819317	1.30319e+06	2.02522e+06	2.13332e+06	2.75367e+06	2.00137e+06	2.53787e+06	1.03816e+06	1.4316e+06	1.89732e+06	1.00397e+07	6.89233e+06	3.72292e+06	4.13483e+06	3.56297e+06
0.698_430.3448	24-homo-1,25-dihydroxyvitamin d3	C28 H46 O3	430.345	0.698		S7826421				level4					1.09082e+06	1.03277e+06	966662	1.07159e+06	1.08244e+06	1.0461e+06	1.04741e+06	1.05377e+06	1.01645e+06	1.07287e+06	1.04741e+06	2.49266e+06	6.9884e+06	1.09526e+07	1.6727e+07	1.48851e+07	3.07203e+06	2.94285e+06	175588	1.97311e+06	697640	7.40754e+06	5.68013e+06	2.81906e+06	1.0948e+06	3.19346e+06
0.698_538.4398		C36 H58 O3	538.44	0.698						level5					1.53441e+06	1.55259e+06	1.22672e+06	1.65698e+06	1.52084e+06	1.50174e+06	1.47988e+06	1.51927e+06	1.37853e+06	1.49933e+06	1.57093e+06	2.135e+06	2.96462e+06	5.48744e+06	6.63384e+06	7.84696e+06	5.37365e+06	6.0843e+06	1.33661e+06	3.84321e+06	7.98308e+06	8.16213e+06	1.38167e+07	5.60844e+06	1.37932e+07	9.89462e+06
0.7_171.1084	3621	C9 H17 N S	171.108	0.7		S3333354	HMDB0037159			level4	Organoheterocyclic compounds	Azolines	Thiazolines		867650	814311	867837	952688	834380	883822	791692	864088	889760	831170	904821	1.11913e+06	6.2427e+06	1.31726e+07	9.02502e+06	1.50175e+06	3.87504e+06	646249	1.81679e+06	5.1859e+06	3.12996e+06	4.04096e+06	5.47667e+06	3.9163e+06	1.86602e+06	1.7855e+06
0.7_385.3345	2-octadecyl-1h-indol-3-ol	C26 H43 N O	385.334	0.7		S9749331	HMDB0033637			level4	Organoheterocyclic compounds	Indoles and derivatives	Hydroxyindoles		175293	216923	190344	201776	214202	210948	176038	194708	187326	202383	217489	16473.1	110432	126793	97374.4	79405.4	1.63282e+06	889911	731889	1.28475e+06	767176	38030	587551	36141.7	950579	144106
0.7_780.3866		C35 H60 N2 O17	780.387	0.7						level5					37402.5	37180.9	37882.9	39400.6	36896.6	37874.1	37734.8	36984	37493.5	39358.6	37025.2	78976.2	8.78017e+06	149707	150106	123568	129135	119327	50189.8	105244	149965	138829	180742	167483	170083	136179
0.701_428.3655	(3beta,24r,24'r)-fucosterol epoxide	C29 H48 O2	428.365	0.701	C03910	S389152				level4	ST Sterol Lipids	ST01 Sterols	ST0104 Stigmasterols and C24-ethyl derivatives	NULL	9.45065e+06	9.45065e+06	9.45065e+06	9.45065e+06	9.45065e+06	9.45065e+06	9.45065e+06	9.45065e+06	9.45065e+06	9.45065e+06	9.45065e+06	9.60684e+06	2.79918e+07	6.486e+07	4.61965e+07	5.16465e+07	5.34493e+07	4.34132e+07	9.6954e+06	3.18479e+07	5.71447e+07	2.71341e+07	1.81997e+07	2.59115e+07	2.55682e+07	2.85932e+07
0.701_546.4448		C32 H59 N4 O P	546.445	0.701						level5					3.16999e+06	2.64436e+06	3.41915e+06	3.64941e+06	2.92849e+06	3.13589e+06	3.05125e+06	2.74019e+06	3.42372e+06	3.49247e+06	2.92306e+06	5.21204e+06	1.81921e+07	1.38231e+07	2.28139e+07	2.01685e+07	1.13342e+07	1.07174e+07	2.91202e+06	8.59622e+06	1.68858e+07	2.04848e+07	2.57969e+07	2.09526e+07	1.89227e+07	2.00219e+07
0.702_424.2998	(1r,3s,5z)-5-[(2e)-2-{(1r,3as,7ar)-1-[(2r,3e,5e,7e)-9-hydroxy-3,5,7-nonatrien-2-yl]-7a-methyloctahydro-4h-inden-4-ylidene}ethylidene]-4-methylene-1,3-cyclohexanediol	C28 H40 O3	424.3	0.702		S7826400				level4					1.13342e+06	1.09004e+06	1.03259e+06	1.1033e+06	1.25519e+06	1.09338e+06	1.13088e+06	1.03653e+06	1.08159e+06	1.15275e+06	1.17613e+06	1.46183e+06	5.92619e+06	7.15925e+06	6.76675e+06	5.56024e+06	4.42314e+06	2.92308e+06	2.12429e+06	3.35853e+06	4.04058e+06	6.56251e+06	5.09218e+06	4.12784e+06	2.94203e+06	3.35387e+06
0.702_473.3063		C30 H39 N3 O2	473.306	0.702						level5					2.02873e+06	1.96992e+06	1.98109e+06	2.03487e+06	1.99511e+06	2.00281e+06	2.00171e+06	2.00236e+06	1.99779e+06	2.00038e+06	2.00656e+06	3.72059e+06	6.80063e+06	1.08351e+07	1.28278e+07	6.90568e+06	9.74151e+06	7.66733e+06	4.37787e+06	7.01917e+06	4.59876e+06	7.91737e+06	4.65746e+06	4.99207e+06	4.11106e+06	5.18076e+06
0.702_522.4446		C36 H58 O2	522.445	0.702						level5					5.60487e+06	5.32648e+06	4.51648e+06	5.59556e+06	5.51862e+06	5.30582e+06	5.27672e+06	5.40301e+06	4.81551e+06	5.76444e+06	5.24439e+06	7.80722e+06	2.06778e+07	3.30649e+07	3.2964e+07	2.66855e+07	3.9374e+07	2.98433e+07	5.7981e+06	2.57415e+07	5.10042e+07	6.9357e+07	9.96357e+07	2.80504e+07	1.239e+08	7.08087e+07
0.702_595.5194		C34 H69 N5 O S	595.519	0.702						level5					1.4345e+06	1.46914e+06	1.25016e+06	1.45493e+06	1.50474e+06	1.41221e+06	1.43673e+06	1.40618e+06	1.31163e+06	1.42951e+06	1.51397e+06	1.63696e+06	2.12096e+06	3.84857e+06	5.94574e+06	3.99991e+06	2.78257e+06	4.26179e+06	1.23689e+06	2.2714e+06	3.21106e+06	5.73453e+06	6.58416e+06	8.27392e+06	3.33337e+06	7.47313e+06
0.702_622.3183		C30 H46 N4 O10	622.318	0.702						level5					412838	300375	531736	281357	305509	348387	371366	274582	209634	491163	521191	554542	89726.5	513441	3.9538e+06	2.44717e+06	954402	817864	3.73233e+06	2.68929e+06	1.8058e+06	1.20709e+06	507120	4.20717e+06	884574	68912.2
0.702_639.4876		C32 H71 N3 O5 P2	639.488	0.702						level5					888926	984429	814544	924781	1.04712e+06	942455	905784	975406	822391	896893	1.02934e+06	1.14928e+06	1.28355e+06	2.1322e+06	4.6015e+06	3.103e+06	1.16131e+06	2.71708e+06	1.61872e+06	1.14976e+06	2.51436e+06	1.59862e+06	5.42215e+06	3.11508e+06	2.73906e+06	2.64408e+06
0.702_667.5381		C39 H73 N O7	667.538	0.702						level5					66215.5	61315	28622	65372.5	84240.2	67572	60833	57141.4	54800.4	50486.6	68066.6	24820.9	49039.7	44502.4	32297.1	42497.3	31154.4	42213.7	13411.4	22549.3	36302	982458	217896	317291	90457.2	221991
0.703_376.2976	(3alpha)-3-hydroxycholan-24-oic acid	C24 H40 O3	376.298	0.703		S9914991				level4					232107	261293	246201	285188	246655	247931	251958	249481	260244	252201	249629	103232	6.36617e+06	1.02823e+06	1.10185e+06	1.06439e+06	1.40271e+06	212771	124930	999181	207124	1.88953e+06	350184	1.06203e+06	234799	413611
0.703_556.4494		C36 H60 O4	556.449	0.703						level5					3.56376e+06	4.67679e+06	3.21293e+06	4.30771e+06	4.0383e+06	3.91287e+06	3.84969e+06	3.9121e+06	3.94361e+06	3.89839e+06	3.93458e+06	3.67332e+06	6.1708e+06	1.07162e+07	1.00759e+07	1.08982e+07	1.12493e+07	2.01719e+07	3.95031e+06	8.42896e+06	1.45717e+07	3.07238e+07	3.32142e+07	1.64485e+07	2.77814e+07	2.32855e+07
0.703_582.4653		C32 H63 N4 O3 P	582.465	0.703						level5					5.13179e+06	5.1686e+06	4.97044e+06	5.26432e+06	5.08687e+06	5.12308e+06	5.12366e+06	5.12707e+06	5.05203e+06	5.24705e+06	5.06959e+06	5.91716e+06	1.71302e+07	2.31933e+07	3.38965e+07	2.79057e+07	1.64552e+07	1.74436e+07	5.34167e+06	1.1632e+07	2.04865e+07	2.33385e+07	4.3957e+07	3.40491e+07	2.74048e+07	4.26129e+07
0.703_617.5015		C35 H74 N O P3	617.501	0.703						level5					4.65668e+06	4.40806e+06	4.11928e+06	4.77767e+06	5.00499e+06	4.85406e+06	4.27521e+06	4.12143e+06	4.67241e+06	4.57282e+06	4.99513e+06	7.09503e+06	1.57936e+07	1.82794e+07	2.15091e+07	2.02525e+07	1.16769e+07	1.6572e+07	4.19952e+06	9.0407e+06	1.43661e+07	2.39207e+07	3.10275e+07	3.93938e+07	1.71312e+07	3.42033e+07
0.703_619.5171		C32 H70 N5 O4 P	619.517	0.703						level5					484222	434935	452927	537328	485839	481128	499474	431768	494690	508960	460674	516421	597302	1.00864e+06	1.12524e+06	637112	1.03008e+06	1.67006e+06	331705	902581	1.10602e+06	4.95606e+06	3.53911e+06	3.87498e+06	2.161e+06	2.09002e+06
0.704_359.3187	(5z,8z,11z,14z)-n-[(2r)-2-butanyl]-5,8,11,14-icosatetraenamide	C24 H41 N O	359.319	0.704		S4446523				level4					519034	519034	519034	519034	519034	519034	519034	519034	519034	519034	519034	54996.3	342131	297457	361449	471003	5.42081e+06	1.7489e+06	1.46679e+06	3.04343e+06	2.23282e+06	293218	2.12969e+06	104661	3.43181e+06	802163
0.704_407.3188		C28 H41 N O	407.319	0.704						level5					283699	324925	303574	327269	327937	309846	328713	252782	326737	312040	345126	78632.4	200734	260572	1.0507e+06	270347	2.38224e+06	970366	1.0086e+06	1.75994e+06	1.02311e+06	2.28047e+06	2.65625e+06	795249	1.76474e+06	857781
0.704_596.4446		C37 H61 N2 O2 P	596.445	0.704						level5					1.90317e+06	2.00714e+06	1.77603e+06	2.2836e+06	1.8753e+06	1.94446e+06	2.06392e+06	1.48076e+06	1.97721e+06	2.00311e+06	2.31985e+06	1.76893e+06	4.09311e+06	7.82418e+06	1.00942e+07	7.18537e+06	3.35432e+06	5.40494e+06	2.59155e+06	3.22032e+06	5.96643e+06	7.11747e+06	1.14905e+07	9.33552e+06	7.44724e+06	1.05313e+07
0.704_615.4855		C34 H69 N3 O2 S2	615.486	0.704						level5					1.73836e+06	1.5864e+06	1.58711e+06	1.76123e+06	1.6555e+06	1.69431e+06	1.66763e+06	1.57904e+06	1.5707e+06	1.91321e+06	1.60135e+06	1.92429e+06	2.30703e+06	3.12826e+06	4.95612e+06	4.27882e+06	3.009e+06	4.66135e+06	1.97082e+06	2.41555e+06	4.51242e+06	8.50451e+06	1.12064e+07	9.28517e+06	5.04022e+06	8.76229e+06
0.705_383.3186	(9e,12e)-n-(1-phenylethyl)-9,12-octadecadienamide	C26 H41 N O	383.319	0.705		S4445341				level4					234636	318377	317800	371188	248287	312954	304901	265014	296053	289895	315372	21791.8	74607.5	108789	139920	71321.4	3.84208e+06	774413	1.32069e+06	3.54968e+06	1.16621e+06	259325	1.26089e+06	46237.5	1.95515e+06	133907
0.705_584.3934		C27 H61 N4 O3 P S2	584.393	0.705						level5					3.2931e+06	3.00624e+06	2.94176e+06	3.2137e+06	3.33594e+06	3.16427e+06	3.11056e+06	2.90148e+06	3.37348e+06	2.95139e+06	3.37316e+06	6.08515e+06	1.09043e+07	1.39566e+07	1.19912e+07	7.84802e+06	1.9826e+07	9.21829e+06	4.13801e+06	1.32123e+07	1.76509e+07	1.25457e+07	1.06439e+07	1.28215e+07	1.42635e+07	1.37961e+07
0.705_591.4867		C36 H65 N O5	591.487	0.705						level5					2.15711e+06	1.9154e+06	1.92296e+06	2.12921e+06	2.17042e+06	2.01731e+06	2.04012e+06	1.84782e+06	2.30147e+06	1.91423e+06	2.14291e+06	2.45794e+06	4.68314e+06	6.61712e+06	3.03239e+06	3.59774e+06	3.44156e+06	5.97818e+06	2.43146e+06	3.21802e+06	5.18866e+06	1.83651e+07	1.57438e+07	1.39714e+07	9.13231e+06	1.28038e+07
0.705_593.5032		C36 H67 N O5	593.503	0.705						level5					2.04997e+06	1.89048e+06	1.80099e+06	2.0679e+06	2.01677e+06	1.98567e+06	1.93902e+06	1.94721e+06	1.81645e+06	2.20764e+06	1.89834e+06	2.19127e+06	2.60896e+06	3.52291e+06	4.99744e+06	4.09388e+06	3.42593e+06	4.83843e+06	2.17062e+06	2.6081e+06	4.89272e+06	1.12532e+07	1.39371e+07	1.39594e+07	5.26975e+06	1.2431e+07
0.705_633.4959		C42 H67 N O S	633.496	0.705						level5					680711	624735	1.20636e+06	741623	828734	723719	910815	761134	837235	744337	764955	488817	697922	975148	1.90941e+06	1.23672e+06	841713	1.6195e+06	553479	731643	712371	2.26421e+06	2.29065e+06	4.61696e+06	1.26253e+06	3.00884e+06
0.705_641.5228		C38 H75 N O2 S2	641.523	0.705						level5					39601.5	45006	33065.7	45051.3	43507.6	41447.9	39512.7	34032.5	42958.6	51756.4	36389	11127	23861.1	23556.7	20876.4	19406.5	21127.7	17490.7	8710.9	15498.9	15595.7	769270	397502	236214	103787	272723
0.706_598.4597		C31 H62 N6 O3 S	598.46	0.706						level5					6.40597e+06	6.05566e+06	5.45832e+06	6.05381e+06	6.52615e+06	6.08195e+06	6.07658e+06	6.03597e+06	5.90271e+06	6.62842e+06	5.80533e+06	5.88118e+06	9.35472e+06	1.47705e+07	2.46959e+07	2.00292e+07	1.37839e+07	1.56723e+07	7.42762e+06	9.78714e+06	1.78147e+07	2.14501e+07	4.4386e+07	2.3403e+07	2.55144e+07	3.28344e+07
0.707_160.0891	2-phenyl-4-pentenal	C11 H12 O	160.089	0.707		S489034	HMDB0035207			level4	Benzenoids	Benzene and substituted derivatives	Phenylacetaldehydes		2.59897e+06	2.5072e+06	2.32458e+06	3.0494e+06	2.77446e+06	2.57271e+06	2.66869e+06	2.48505e+06	2.4432e+06	2.9273e+06	2.62779e+06	4.90145e+06	9.41254e+06	6.8456e+06	1.28449e+07	1.38178e+07	4.29522e+06	3.62329e+06	2.54396e+06	3.31656e+06	3.06996e+06	4.62804e+06	1.23789e+07	7.93238e+06	4.22373e+06	1.04535e+07
0.707_567.4894			567.489	0.707						level5					446282	530800	431992	550440	461977	475700	479237	467334	528631	482297	451394	515378	634104	1.95936e+06	1.69087e+06	1.7402e+06	1.67947e+06	1.89447e+06	661753	860829	1.32429e+06	4.21267e+06	2.79879e+06	3.28015e+06	2.25778e+06	5.26353e+06
0.707_580.4496		C37 H61 N2 O P	580.45	0.707						level5					1.88436e+06	1.92948e+06	1.72077e+06	1.86454e+06	1.93618e+06	1.86412e+06	1.86487e+06	1.84351e+06	1.85758e+06	1.95956e+06	1.80115e+06	1.79091e+06	3.26465e+06	3.87861e+06	5.94519e+06	6.47651e+06	4.6573e+06	4.95218e+06	2.44304e+06	3.00061e+06	5.65727e+06	4.69579e+06	1.51497e+07	6.6763e+06	8.87592e+06	8.66938e+06
0.707_631.4806		C32 H66 N5 O5 P	631.481	0.707						level5					953444	952436	948212	958526	950339	952594	952571	953036	952113	951537	953681	1.02316e+06	1.48196e+06	2.41808e+06	2.67881e+06	2.70763e+06	2.08271e+06	2.56105e+06	1.0459e+06	1.47751e+06	1.50599e+06	4.53075e+06	5.46866e+06	7.50973e+06	2.47386e+06	4.3008e+06
0.708_258.1984	Acetyl hexamethyl tetralin	C18 H26 O	258.198	0.708		S80719	HMDB0061860			level4	Benzenoids	Tetralins	null		1.53381e+07	1.51296e+07	1.49053e+07	1.58477e+07	1.50201e+07	1.53028e+07	1.51647e+07	1.52771e+07	1.51713e+07	1.55388e+07	1.50403e+07	2.158e+07	2.23002e+07	2.36272e+07	3.73744e+07	3.38042e+07	3.33209e+07	4.81842e+07	2.50627e+07	2.17077e+07	3.10978e+07	2.86265e+07	5.50695e+07	2.30098e+07	4.74308e+07	3.87189e+07
0.708_357.9726		C10 H17 Cl N2 P2 S3	357.973	0.708						level5					898749	778344	786045	882899	845125	927899	854402	877930	721191	868825	899029	1.22765e+06	3.49527e+06	1.13719e+07	1.4887e+06	920060	651356	1.1244e+06	4.1084e+06	6.55688e+06	2.81411e+06	1.37809e+06	3.55128e+06	1.74132e+06	970537	3.28104e+06
0.708_566.4711		C31 H62 N6 O S	566.471	0.708						level5					4.69038e+06	4.58296e+06	4.16118e+06	4.55427e+06	5.38778e+06	4.57999e+06	4.66352e+06	4.4912e+06	4.4046e+06	4.70072e+06	4.92277e+06	7.82882e+06	2.02648e+07	3.17565e+07	5.01473e+07	3.92349e+07	2.43541e+07	2.29753e+07	3.12052e+06	1.65037e+07	2.75767e+07	1.57938e+07	3.28918e+07	1.51405e+07	3.89959e+07	3.21309e+07
0.708_649.4912		C32 H68 N5 O6 P	649.491	0.708						level5					2.80099e+06	2.69708e+06	2.76139e+06	2.93091e+06	2.80716e+06	2.82922e+06	2.80574e+06	2.60789e+06	2.55947e+06	3.4217e+06	2.6364e+06	4.04941e+06	5.43092e+06	6.57329e+06	1.26617e+07	8.16467e+06	4.6495e+06	6.55165e+06	2.64446e+06	3.41003e+06	3.87746e+06	1.15336e+07	1.28491e+07	1.12044e+07	5.84392e+06	1.03128e+07
0.709_270.1984	17beta-methylestra-1,3,5(10)-trien-3-ol	C19 H26 O	270.198	0.709	C15020	S10128395				level4				NULL	1.15751e+06	1.15312e+06	977055	1.1909e+06	1.26504e+06	1.28558e+06	1.04248e+06	1.12986e+06	1.26791e+06	1.09537e+06	1.14018e+06	1.54077e+06	2.619e+06	2.29544e+06	3.27086e+06	4.25731e+06	1.65073e+06	1.64673e+06	1.0221e+06	1.18957e+06	1.54628e+06	2.69306e+06	3.79018e+06	2.5273e+06	2.16321e+06	2.49047e+06
0.709_310.2507	(+/-)-methoprene	C19 H34 O3	310.251	0.709	C14308	S4518347				level4				NULL	510203	508685	450261	554575	500572	447059	506770	534499	495490	555680	434998	1.68557e+06	365176	467144	244081	574071	705371	227146	296435	691614	339265	6.58238e+06	1.72968e+06	1.29092e+07	225470	1.72836e+06
0.709_325.3344		C21 H43 N O	325.334	0.709						level5					1.46227e+06	1.74178e+06	1.36488e+06	1.532e+06	1.73817e+06	1.55833e+06	1.55019e+06	1.51135e+06	1.48059e+06	1.73762e+06	1.50202e+06	1.56732e+06	4.46215e+06	7.66197e+06	5.16611e+06	3.76402e+06	5.49908e+06	5.65835e+06	2.24104e+06	4.74177e+06	5.49738e+06	3.75227e+06	6.00635e+06	3.89699e+06	4.92257e+06	4.30612e+06
0.709_384.2381		C19 H36 N4 S2	384.238	0.709						level5					1.2571e+07	1.57454e+07	1.34631e+07	1.28451e+07	1.30843e+07	1.65683e+07	1.45661e+07	1.2741e+07	1.1749e+07	1.44614e+07	1.51956e+07	3.09631e+07	7.08253e+07	6.7451e+07	6.69462e+07	5.66542e+07	7.00058e+07	5.65529e+07	1.14305e+07	4.70431e+07	6.37386e+07	6.65486e+07	5.1711e+07	6.49405e+07	4.59174e+07	6.25458e+07
0.709_651.5063		C35 H76 N O3 P3	651.506	0.709						level5					331125	356827	363744	364956	405504	342243	343762	394166	326454	372606	363984	439954	603878	806209	894870	704273	538989	1.35215e+06	260221	481884	649220	4.59195e+06	2.54218e+06	983750	1.25813e+06	970216
0.71_590.455		C37 H58 N4 O2	590.455	0.71						level5					2.90345e+06	3.29617e+06	2.83191e+06	2.90552e+06	3.01916e+06	3.025e+06	2.9941e+06	2.95926e+06	2.79875e+06	3.24393e+06	2.95993e+06	1.86119e+06	2.43026e+06	7.55648e+06	5.08077e+06	5.52744e+06	5.92165e+06	1.1758e+07	4.25117e+06	4.82855e+06	6.36967e+06	2.51474e+07	2.40115e+07	1.44385e+07	1.59343e+07	1.18006e+07
0.71_607.4818		C33 H69 N O6 S	607.482	0.71						level5					1.19036e+06	925051	942109	789994	1.02528e+06	998833	930971	952462	915546	923457	1.11037e+06	657988	644418	1.98373e+06	1.14342e+06	1.26161e+06	1.95223e+06	3.18409e+06	1.16889e+06	1.53254e+06	1.56825e+06	9.36307e+06	4.69098e+06	4.04701e+06	4.02216e+06	5.10855e+06
0.71_655.4815		C31 H70 N5 O5 P S	655.481	0.71						level5					462114	359808	501544	449779	401017	416525	432012	416201	396932	424010	487173	529155	572440	905177	1.88734e+06	1.23435e+06	434866	1.08016e+06	536611	439069	788857	1.49292e+06	2.03287e+06	1.7949e+06	1.14483e+06	1.54066e+06
0.71_671.4764		C41 H61 N5 O3	671.476	0.71						level5					565889	515270	569281	574145	538161	551381	553683	551520	533101	575917	547023	1.08843e+06	1.2192e+06	1.36742e+06	3.06518e+06	1.76625e+06	620639	1.2049e+06	460508	565487	917333	2.06861e+06	3.27471e+06	1.27895e+06	966526	1.99939e+06
0.711_541.1997		C26 H33 N5 O4 P2	541.2	0.711						level5					51684.1	51164.2	44922.5	46621.5	87157.4	52969	51575.4	47723.2	69033	49325	52058	74775.1	3.62702e+07	145668	156960	157434	140122	110776	71646.3	123120	237153	129153	254685	155739	190319	185280
0.711_665.4861		C34 H73 N3 O3 P2 S	665.486	0.711						level5					1.18777e+06	1.62083e+06	1.51862e+06	1.35181e+06	1.37505e+06	1.41205e+06	1.63691e+06	1.33361e+06	1.16363e+06	1.39501e+06	1.65064e+06	1.97669e+06	2.47643e+06	2.94622e+06	3.33935e+06	3.12214e+06	1.85042e+06	3.02309e+06	1.00831e+06	1.80068e+06	1.70781e+06	7.47348e+06	5.9826e+06	5.22614e+06	2.13454e+06	4.29657e+06
0.711_667.5022		C32 H70 N5 O7 P	667.502	0.711						level5					216494	222190	130006	113223	203905	201653	121280	139822	176271	226101	174275	224393	148643	563792	377618	119160	333729	298607	106456	361151	239336	4.31688e+06	1.6806e+06	812194	737314	891840
0.712_296.0509	Disulfiram	C10 H20 N2 S4	296.051	0.712	C01692	S3005	HMDB0014960			level4	Organic nitrogen compounds	Organonitrogen compounds	Amines	NULL	1.03987e+06	997357	959529	1.04616e+06	1.04215e+06	1.01568e+06	1.01172e+06	1.01688e+06	1.0139e+06	1.00209e+06	1.03119e+06	1.46844e+06	8.4257e+06	9.11465e+06	422486	1.33067e+06	275354	1.157e+06	35556.6	161506	658037	2.79323e+06	1.97386e+07	410749	52322.5	372040
0.712_623.4747		C37 H61 N5 O3	623.475	0.712						level5					1.08336e+06	1.342e+06	1.09086e+06	1.19456e+06	1.30252e+06	1.38742e+06	1.09775e+06	1.53961e+06	1.00705e+06	1.10114e+06	1.30178e+06	1.13599e+06	816106	3.01804e+06	1.69821e+06	1.66923e+06	2.3113e+06	5.19957e+06	1.41978e+06	2.19871e+06	1.96723e+06	1.46598e+07	8.39774e+06	5.32095e+06	4.84745e+06	4.34282e+06
0.713_115.0458	Butyl isothiocyanate	C5 H9 N S	115.046	0.713		S11124	HMDB0031328			level4	Organosulfur compounds	Isothiocyanates	null		1.12802e+07	8.38364e+06	8.8604e+06	1.15106e+07	9.53912e+06	1.02874e+07	9.6245e+06	9.7763e+06	8.82593e+06	1.12402e+07	9.73555e+06	1.64797e+07	5.95072e+07	1.03011e+08	1.31445e+08	1.65635e+07	3.96262e+07	8.92407e+06	2.63342e+07	7.59942e+07	2.88645e+07	4.47709e+07	1.78586e+08	3.31871e+07	4.20701e+07	1.83777e+07
0.713_444.3605	3beta-hydroxy-4beta-methyl-5alpha-cholest-7-ene-4alpha-carboxylic acid	C29 H48 O3	444.361	0.713	C04840	S389424				level4				NULL	3.07976e+06	3.07219e+06	3.01326e+06	3.396e+06	3.13243e+06	3.19485e+06	3.01855e+06	3.29263e+06	2.86474e+06	2.89006e+06	3.57449e+06	2.32066e+06	1.38983e+07	2.26578e+07	2.26334e+07	3.11219e+07	2.07922e+07	1.09503e+07	1.67206e+06	8.82748e+06	8.37467e+06	1.2036e+07	7.38247e+06	6.64353e+06	6.91509e+06	1.10259e+07
0.713_539.4198		C31 H57 N O6	539.42	0.713						level5					2.51679e+06	3.12762e+06	2.44019e+06	2.91847e+06	3.11642e+06	3.25348e+06	2.6162e+06	3.01234e+06	2.63696e+06	2.91084e+06	2.80045e+06	3.93083e+06	1.09778e+07	1.17443e+07	1.1195e+07	8.90794e+06	1.38927e+07	9.07549e+06	3.74292e+06	1.05888e+07	1.19366e+07	1.1071e+07	1.06317e+07	1.11463e+07	9.70726e+06	9.34669e+06
0.713_639.4689		C40 H67 N O P2	639.469	0.713						level5					979742	655494	671056	613794	828033	769764	665818	683109	764398	844317	706426	591894	1.12781e+06	2.02284e+06	1.34829e+06	1.2638e+06	1.65204e+06	2.44652e+06	643257	1.09138e+06	1.43112e+06	1.58914e+07	5.46175e+06	3.82009e+06	2.55171e+06	5.38914e+06
0.714_331.2876	Arachidonoyl-n,n-dimethyl amide	C22 H37 N O	331.288	0.714		S4446529				level4					292553	261224	268849	287450	320702	301326	315909	223077	279207	381647	257406	116171	3.16429e+06	184448	234586	2.04458e+06	1.51148e+06	450826	931675	1.2063e+06	881995	2.72651e+06	404641	94773.7	111957	713986
0.714_353.2752		C21 H39 N O S	353.275	0.714						level5					1.07983e+06	855769	555094	983163	604589	691722	1.27981e+06	772928	616282	1.14095e+06	623455	924035	2.13881e+06	6.67926e+06	3.63551e+06	2.12361e+06	2.08796e+06	1.15141e+06	1.19745e+06	1.92962e+06	2.8215e+06	4.31459e+06	2.82806e+06	2.17511e+06	4.30447e+06	2.38329e+06
0.714_673.4541		C39 H63 N O8	673.454	0.714						level5					9.70797e+06	1.00931e+07	8.33287e+06	1.08499e+07	8.96709e+06	9.69401e+06	9.62832e+06	9.64022e+06	8.64236e+06	9.91886e+06	1.00506e+07	4.30025e+07	1.90011e+07	2.33946e+07	1.81899e+07	2.8691e+07	2.02092e+07	2.18624e+07	1.76229e+07	1.79145e+07	2.49351e+07	1.98596e+07	2.2505e+07	2.56966e+07	1.92028e+07	1.9369e+07
0.715_214.1724		C16 H22	214.172	0.715						level5					1.60723e+06	1.59235e+06	1.37465e+06	1.76764e+06	1.52638e+06	1.60452e+06	1.53968e+06	1.60487e+06	1.48591e+06	1.54079e+06	1.66139e+06	1.90771e+06	3.47063e+06	4.23298e+06	8.79672e+06	6.65054e+06	4.28364e+06	3.36895e+06	1.56672e+06	2.65818e+06	4.62961e+06	5.93382e+06	1.2982e+07	5.47747e+06	6.32259e+06	8.51625e+06
0.715_511.4092		C27 H53 N5 O4	511.409	0.715						level5					115480	101722	105865	76720.5	81097.9	122095	67046.1	114309	106347	63355.9	132578	350015	709775	111669	113226	4.64704e+06	72412.6	155590	78040.1	284734	252855	147895	115376	237404	188487	246560
0.715_647.4752		C42 H65 N O2 S	647.475	0.715						level5					841437	1.00736e+06	1.02174e+06	928941	954894	995985	1.13047e+06	947083	738369	961444	1.11515e+06	1.55379e+06	2.0283e+06	1.94568e+06	2.83673e+06	2.41093e+06	1.33678e+06	2.44408e+06	735685	1.3337e+06	1.13895e+06	4.36989e+06	3.87154e+06	3.7781e+06	1.32759e+06	2.88169e+06
0.716_144.0941		C11 H12	144.094	0.716						level5					3.81397e+06	3.77607e+06	3.2622e+06	4.50546e+06	3.37777e+06	3.80768e+06	3.78772e+06	3.43644e+06	3.42846e+06	4.62932e+06	3.46977e+06	5.93151e+06	1.30734e+07	1.58127e+07	2.99459e+07	1.98594e+07	1.55855e+07	1.12006e+07	6.76098e+06	1.05867e+07	1.48863e+07	1.79663e+07	2.74142e+07	1.66812e+07	2.97562e+07	2.50483e+07
0.716_316.24	Pregnane-3,20-dione	C21 H32 O2	316.24	0.716		S389575				level4					493986	652216	465172	785300	523615	588702	505241	659046	520874	714319	467178	3.8562e+06	1.05009e+06	2.2164e+06	1.73796e+06	1.44019e+06	923290	989949	578136	547705	770051	2.62772e+06	3.21914e+06	2.55135e+06	1.38325e+06	2.81958e+06
0.717_206.131	Ibuprofen	C13 H18 O2	206.131	0.717	C01588	S3544	HMDB0001925			level4	Phenylpropanoids and polyketides	Phenylpropanoic acids	null	NULL	2.28214e+06	4.51474e+06	3.54192e+06	5.08547e+06	2.79253e+06	4.79776e+06	3.1415e+06	3.91084e+06	4.18205e+06	2.88999e+06	3.44329e+06	6.91882e+06	1.06005e+07	1.00203e+07	1.26765e+07	8.13526e+06	8.65014e+06	8.23963e+06	4.34652e+06	8.06376e+06	8.34838e+06	1.46278e+07	1.73598e+07	1.47177e+07	8.64111e+06	1.04298e+07
0.717_368.3441		C27 H44	368.344	0.717						level5					7.37051e+06	7.52388e+06	5.42303e+06	7.2223e+06	6.35678e+06	7.5936e+06	5.34796e+06	1.0787e+07	3.97869e+06	5.72293e+06	9.78002e+06	1.39757e+07	1.46204e+07	1.82681e+07	1.63082e+07	1.6412e+07	1.6735e+07	2.22835e+07	2.19373e+06	1.69039e+07	2.53577e+07	2.2437e+07	2.8147e+07	3.63579e+07	1.87708e+07	2.95253e+07
0.717_572.4439		C36 H60 O5	572.444	0.717						level5					1.5881e+06	2.20621e+06	1.54086e+06	1.71706e+06	1.68014e+06	1.80641e+06	1.45349e+06	1.67683e+06	1.53574e+06	2.01665e+06	1.83e+06	952498	1.84371e+06	5.16557e+06	4.06709e+06	3.84645e+06	2.90178e+06	7.351e+06	2.13716e+06	2.77236e+06	3.42183e+06	1.2895e+07	1.41928e+07	8.73456e+06	8.4067e+06	6.13256e+06
0.718_326.0005		C10 H7 Cl N6 O3 S	326	0.718						level5					2.53723e+06	2.57233e+06	2.65699e+06	2.56092e+06	2.35004e+06	2.45218e+06	2.60153e+06	2.45787e+06	2.31873e+06	2.66782e+06	2.65919e+06	5.44785e+06	8.50603e+06	2.17987e+07	1.86699e+07	5.32829e+06	1.38135e+07	3.28767e+06	9.13486e+06	1.95028e+07	8.94461e+06	1.48011e+07	1.34207e+07	1.32651e+07	1.32925e+07	7.6858e+06
0.719_402.2559		C22 H35 N4 O P	402.256	0.719						level5					1.17962e+06	1.20923e+06	1.0665e+06	1.26216e+06	1.22967e+06	1.18617e+06	1.15982e+06	1.23996e+06	1.12743e+06	1.18678e+06	1.20616e+06	39140.2	1.32553e+06	150251	1.18727e+06	114813	3.26785e+06	6.63133e+06	2.67215e+06	2.36833e+06	3.77775e+06	39566.2	132350	618366	6.45869e+06	1.36842e+06
0.719_428.2718	4,4'-diapolycopenedial	C30 H36 O2	428.272	0.719	C19798	S9277175				level4					303399	276331	332251	352512	412811	358194	227302	364111	306453	334830	361679	156919	615083	1.12683e+06	1.27126e+06	342109	709231	1.40705e+06	805963	589738	1.46304e+06	73511	128899	240285	2.61315e+06	558439
0.719_612.4349		C31 H65 O9 P	612.435	0.719						level5					298633	454014	633535	376955	283313	334786	468035	359976	284571	458737	448229	405214	665155	1.02806e+06	563558	1.24791e+06	927018	1.10763e+06	346009	403973	653951	1.51741e+06	3.58565e+06	3.42055e+06	1.25059e+06	3.64274e+06
0.72_176.1568	Heptylbenzene	C13 H20	176.157	0.72		S13492	HMDB0061825			level4	Benzenoids	Benzene and substituted derivatives	null		2.53221e+06	2.12293e+06	2.58369e+06	2.79469e+06	2.40999e+06	2.18899e+06	2.2746e+06	2.58822e+06	3.27732e+06	1.92549e+06	2.36466e+06	3.86893e+06	8.27301e+06	5.12632e+06	1.16182e+07	9.58528e+06	5.35043e+06	4.15385e+06	5.06976e+06	4.52857e+06	7.13985e+06	7.77576e+06	7.13898e+06	9.00412e+06	7.78905e+06	6.52856e+06
0.721_188.1568		C14 H20	188.157	0.721						level5					1.66691e+06	1.51392e+06	2.1335e+06	1.44759e+06	1.83163e+06	1.7036e+06	1.69723e+06	1.60024e+06	1.6905e+06	1.85708e+06	1.64246e+06	1.80949e+06	8.32202e+06	9.74921e+06	2.11529e+07	1.91444e+07	6.63804e+06	4.00362e+06	5.52711e+06	5.47876e+06	5.98915e+06	9.43735e+06	1.10369e+07	9.72073e+06	1.37547e+07	1.27341e+07
0.721_614.4542		C38 H62 O6	614.454	0.721						level5					937186	1.06391e+06	967178	955062	783063	1.63895e+06	560598	781213	974538	941967	1.34857e+06	698953	1.11594e+06	4.23319e+06	4.19409e+06	2.23398e+06	1.73499e+06	2.42989e+06	884564	1.27393e+06	1.92872e+06	3.38243e+06	5.76589e+06	5.42929e+06	3.03209e+06	5.32216e+06
0.722_186.1411	5-ethyl-3,8-dimethyl-1,7-dihydroazulene	C14 H18	186.141	0.722		S30777162	HMDB0036471			level4	Hydrocarbons	Unsaturated hydrocarbons	Branched unsaturated hydrocarbons		525121	489667	311342	913393	527761	499869	487750	529041	529906	575089	456189	774336	2.52122e+06	1.84138e+06	5.16786e+06	4.33327e+06	1.69341e+06	970971	810851	887513	1.04189e+06	2.38635e+06	1.37329e+06	2.31033e+06	1.70866e+06	2.44646e+06
0.722_350.2277		C21 H34 O2 S	350.228	0.722						level5					2.1856e+07	2.18471e+07	3.00887e+07	1.92046e+07	2.55203e+07	2.37195e+07	2.2847e+07	2.28389e+07	2.10383e+07	3.05148e+07	2.04622e+07	3.78756e+07	4.91149e+07	5.0814e+07	1.29031e+08	5.20244e+07	1.50394e+08	4.07008e+07	4.22211e+07	8.75477e+07	1.46274e+08	7.83948e+07	1.00605e+08	5.05808e+07	1.08161e+08	7.79464e+07
0.723_269.2225		C13 H27 N5 O	269.223	0.723						level5					2.24092e+07	2.21651e+07	2.20769e+07	2.2689e+07	2.21498e+07	2.22965e+07	2.22972e+07	2.23114e+07	2.21209e+07	2.25749e+07	2.21825e+07	2.08313e+07	1.05601e+08	1.18221e+08	1.89501e+08	1.54561e+08	8.7585e+07	5.56435e+07	5.56108e+07	6.27121e+07	6.14198e+07	9.06243e+07	6.09986e+07	1.12509e+08	1.01698e+08	9.55603e+07
0.723_568.3985		C29 H56 N6 O S2	568.399	0.723						level5					2.42641e+07	2.31897e+07	2.44173e+07	2.39253e+07	2.38969e+07	2.39311e+07	2.3935e+07	2.39427e+07	2.38915e+07	2.39924e+07	2.39121e+07	3.20749e+07	6.78807e+07	1.08537e+08	7.07147e+07	7.72383e+07	9.34047e+07	7.46918e+07	1.54206e+07	9.86683e+07	1.10515e+08	8.63521e+07	6.06814e+07	1.02056e+08	6.47429e+07	1.03844e+08
0.726_94.0783	1,3,5-heptatriene	C7 H10	94.0783	0.726		S4518902	HMDB0061889			level4	Hydrocarbons	Unsaturated hydrocarbons	Olefins		5.64866e+06	5.64866e+06	5.64866e+06	5.64866e+06	5.64866e+06	5.64866e+06	5.64866e+06	5.64866e+06	5.64866e+06	5.64866e+06	5.64866e+06	5.72804e+06	2.52501e+07	3.33037e+07	3.01844e+07	3.17486e+07	1.031e+07	1.12339e+07	1.2092e+07	2.42001e+07	1.89977e+07	3.05696e+07	1.40362e+07	3.08284e+07	2.21608e+07	1.75903e+07
0.727_635.512			635.512	0.727						level5					761250	912339	799432	875572	810109	839127	898032	771332	873301	802655	843131	1.12404e+06	1.85929e+06	2.31168e+06	3.45144e+06	1.93042e+06	2.25772e+06	2.06048e+06	1.02806e+06	2.00744e+06	2.08987e+06	4.11387e+06	2.84759e+06	2.25113e+06	1.95888e+06	1.98181e+06
0.729_172.1255	1,1,6-trimethyl-1,2-dihydronaphthalene	C13 H16	172.125	0.729		S108567	HMDB0040284			level4	Benzenoids	Naphthalenes	null		2.76226e+06	2.75794e+06	3.09642e+06	2.68891e+06	2.79618e+06	2.8088e+06	2.82718e+06	2.85737e+06	2.49418e+06	3.30929e+06	2.66424e+06	5.9518e+06	8.18967e+06	3.68013e+06	3.98654e+06	7.09041e+06	3.01042e+06	5.88226e+06	2.17381e+06	4.4687e+06	1.04955e+06	6.79437e+06	4.24891e+06	1.23066e+07	1.14319e+06	5.13388e+06
0.729_375.2407	(3beta,6beta,9xi,13xi)-15-(dimethylamino)-3-hydroxy-6,18:14,16-diepoxypimar-7-en-18-one	C22 H33 N O4	375.241	0.729	C08689	S390340				level4	Alkaloids	Alkaloids derived by amination reactions	Terpenoid alkaloids	NULL	423933	428049	351783	387437	597086	426479	413013	394255	470181	479201	377498	2.02339e+06	514471	619339	969353	680621	913791	611784	584669	934690	1.02174e+06	2.5141e+06	2.86574e+06	1.43027e+06	1.03325e+06	971570
0.73_365.3655		C24 H47 N O	365.365	0.73						level5					5.30592e+06	5.67603e+06	4.50505e+06	5.90543e+06	4.79491e+06	6.19608e+06	3.95307e+06	6.01263e+06	5.43744e+06	4.77571e+06	5.49819e+06	1.96677e+07	3.14888e+07	2.31205e+07	1.9779e+07	8.87762e+06	1.60013e+07	1.56323e+07	2.37662e+06	1.24526e+07	1.07596e+07	1.30854e+07	1.12208e+07	9.32121e+06	1.32204e+07	1.68699e+07
0.731_246.1619	Geroquinol	C16 H22 O2	246.162	0.731	C10793	S4445151				level4				map00130 Ubiquinone and other terpenoid-quinone biosynthesis;	2.8665e+06	2.74738e+06	2.48361e+06	3.02476e+06	2.95083e+06	2.8133e+06	2.80216e+06	2.77414e+06	2.9343e+06	2.75902e+06	2.75238e+06	1.02492e+07	1.36349e+07	9.92848e+06	2.01651e+07	1.95798e+07	4.31471e+06	4.25807e+06	3.36123e+06	3.64892e+06	4.55895e+06	1.29939e+07	1.40715e+07	5.20387e+06	7.00844e+06	6.49324e+06
0.732_132.094	Tetralin	C10 H12	132.094	0.732	C14114	S8097				level4					4.48376e+06	3.79735e+06	3.69027e+06	4.59626e+06	4.09961e+06	4.3136e+06	4.04683e+06	4.62352e+06	3.73939e+06	4.58758e+06	3.75361e+06	5.21169e+06	8.27512e+06	1.12413e+07	9.04408e+06	1.03759e+07	9.10894e+06	6.99103e+06	6.56817e+06	5.65109e+06	7.28539e+06	8.48655e+06	8.31784e+06	1.03495e+07	9.76419e+06	1.13893e+07
0.732_401.3315		C23 H47 N O2 S	401.332	0.732						level5					4.32991e+06	3.38215e+06	3.07729e+06	5.4333e+06	4.29101e+06	4.49188e+06	3.8494e+06	4.0693e+06	4.26926e+06	4.34762e+06	3.53477e+06	135231	1.556e+06	238939	1.43897e+06	166590	2.68758e+07	2.25324e+07	8.06607e+06	2.39698e+07	7.80009e+06	233807	212189	264591	1.18562e+07	1.97232e+06
0.733_401.3297		C26 H43 N O2	401.33	0.733						level5					6.96517e+06	5.91318e+06	5.74691e+06	7.7543e+06	6.88449e+06	6.91985e+06	6.44362e+06	6.53584e+06	7.35628e+06	6.97836e+06	5.77184e+06	277370	3.03041e+06	506603	2.45273e+06	354123	4.26011e+07	5.08199e+07	1.1763e+07	3.89684e+07	1.26944e+07	494770	441092	553018	2.06034e+07	3.14925e+06
0.733_423.3136	(5z,8z,11z,14z)-n-(2-phenoxyethyl)-5,8,11,14-icosatetraenamide	C28 H41 N O2	423.314	0.733		S4446555				level4					4.32991e+06	3.38215e+06	3.07729e+06	5.4333e+06	4.29101e+06	4.49188e+06	3.8494e+06	4.0693e+06	4.26926e+06	4.34762e+06	3.53477e+06	137703	1.556e+06	243307	1.43897e+06	169636	2.68758e+07	2.25324e+07	8.06607e+06	2.39698e+07	7.80009e+06	238081	216068	269428	1.18562e+07	1.97232e+06
0.733_588.4368		C30 H61 N4 O5 P	588.437	0.733						level5					496324	791675	893444	584364	939320	731075	750584	581546	960970	697005	635234	761636	1.30529e+06	1.66352e+06	1.51864e+06	1.72297e+06	1.69169e+06	5.34199e+06	1.42438e+06	1.51307e+06	3.03418e+06	7.36399e+06	1.05003e+07	5.19231e+06	7.94361e+06	5.49388e+06
0.734_320.3077		C22 H40 O	320.308	0.734						level5					5.01569e+08	5.34808e+08	5.73383e+08	3.81436e+08	5.41651e+08	5.30738e+08	5.12352e+08	4.37338e+08	5.68416e+08	4.82079e+08	5.22666e+08	6.35983e+08	8.65893e+08	9.75066e+08	1.19985e+09	5.26637e+08	9.21947e+08	7.99241e+08	3.97005e+08	7.97319e+08	1.0264e+09	6.12072e+08	6.79956e+08	7.43839e+08	6.17887e+08	9.6478e+08
0.734_337.3342		C22 H43 N O	337.334	0.734						level5					5.17375e+08	5.49087e+08	5.87288e+08	3.94212e+08	5.57611e+08	5.45647e+08	5.27745e+08	4.49788e+08	5.85365e+08	4.94189e+08	5.3944e+08	6.55189e+08	9.0101e+08	1.01995e+09	1.23368e+09	5.38742e+08	9.42336e+08	8.22126e+08	4.02411e+08	8.16134e+08	1.04743e+09	6.28994e+08	7.03088e+08	7.6372e+08	6.38839e+08	9.8866e+08
0.735_645.6051		C42 H79 N O3	645.605	0.735						level5					6.69775e+06	6.53462e+06	3.94383e+06	6.36477e+06	5.24972e+06	7.03305e+06	5.62227e+06	6.52693e+06	6.87637e+06	3.98993e+06	6.26402e+06	1.49547e+07	2.09239e+07	2.27016e+07	3.09494e+07	5.10622e+06	1.60299e+07	2.18573e+07	985305	1.57679e+07	1.27683e+07	1.31348e+07	1.58378e+07	1.24496e+07	9.13267e+06	1.86262e+07
0.735_646.6366		C42 H82 N2 O2	646.637	0.735						level5					9.89582e+06	1.00899e+07	9.7794e+06	8.7669e+06	1.19136e+07	9.75988e+06	1.06288e+07	8.7233e+06	1.05145e+07	8.3544e+06	1.23704e+07	1.17791e+07	2.65054e+07	4.46766e+07	3.25139e+07	2.12956e+07	2.16326e+07	2.44135e+07	7.36215e+06	1.70263e+07	2.84191e+07	2.04288e+07	2.26741e+07	2.32244e+07	2.0309e+07	2.2071e+07
0.736_345.2666	Epea	C22 H35 N O2	345.267	0.736		S4446570	HMDB0013649		38.8	level4	Organic nitrogen compounds	Organonitrogen compounds	Amines		9.97904e+06	9.01422e+06	6.31902e+06	1.12602e+07	9.27456e+06	4.98379e+06	9.78465e+06	8.40637e+06	9.08006e+06	8.39614e+06	8.94297e+06	1.74973e+07	1.94479e+07	4.41568e+07	4.51321e+07	4.11815e+07	1.73317e+07	3.37296e+07	1.60983e+07	1.28623e+07	1.81268e+07	2.73737e+07	4.32637e+07	3.53787e+07	3.58251e+07	3.13666e+07
0.737_190.1359	3420	C13 H18 O	190.136	0.737		S4517997	HMDB0013804			level4	Organic oxygen compounds	Organooxygen compounds	Carbonyl compounds		8.77402e+06	9.88471e+06	8.92524e+06	9.98831e+06	9.25744e+06	8.74313e+06	1.00522e+07	1.03291e+07	7.96222e+06	1.07755e+07	8.43533e+06	1.53817e+07	1.52805e+07	8.60068e+06	1.31209e+07	1.56686e+07	1.74703e+07	1.66669e+07	1.10827e+07	1.10857e+07	4.14648e+06	1.3591e+07	1.16557e+07	3.09731e+07	4.43961e+06	1.70966e+07
0.737_208.1464	Ac 45594	C13 H20 O2	208.146	0.737	C14236	S23889				level4				NULL	2.84953e+07	2.99643e+07	2.78182e+07	3.18876e+07	2.96896e+07	3.13912e+07	2.9181e+07	3.02554e+07	2.77866e+07	3.20287e+07	2.85615e+07	3.98661e+07	4.67889e+07	3.13701e+07	3.91215e+07	4.79163e+07	6.09244e+07	6.08546e+07	3.44419e+07	3.95188e+07	1.60725e+07	4.5903e+07	3.64132e+07	8.23518e+07	1.70975e+07	6.16315e+07
0.737_225.173		C13 H23 N O2	225.173	0.737						level5					2.92424e+07	3.18771e+07	2.93934e+07	3.32638e+07	3.08727e+07	3.32064e+07	3.02487e+07	3.26303e+07	2.89704e+07	3.46199e+07	2.84695e+07	4.15886e+07	4.85027e+07	3.14451e+07	3.84092e+07	4.84992e+07	6.39626e+07	6.3511e+07	3.56549e+07	4.01932e+07	1.70337e+07	4.77138e+07	3.50574e+07	9.04762e+07	1.67815e+07	6.27762e+07
0.737_243.1834	N-undecanoylglycine	C13 H25 N O3	243.183	0.737		S399857	HMDB0013286			level4	Organic acids and derivatives	Carboxylic acids and derivatives	Amino acids, peptides, and analogues		6.92517e+06	8.44057e+06	6.69073e+06	7.50429e+06	7.26589e+06	7.67092e+06	7.32378e+06	7.79998e+06	7.75148e+06	8.11827e+06	6.11163e+06	7.74041e+06	1.15834e+07	4.80565e+06	8.18351e+06	1.32045e+07	1.37075e+07	1.43557e+07	7.60934e+06	9.32418e+06	2.96668e+06	6.61146e+06	7.21435e+06	2.11416e+07	2.74147e+06	1.41871e+07
0.737_311.3186		C20 H41 N O	311.319	0.737						level5					6.94632e+06	5.79699e+06	1.13307e+07	8.56281e+06	6.32179e+06	7.21501e+06	8.29672e+06	6.82052e+06	8.05516e+06	7.62971e+06	7.32067e+06	1.33226e+07	4.99517e+07	1.00722e+08	3.56859e+07	2.73393e+07	4.53116e+07	2.59843e+07	1.00158e+07	3.84535e+07	4.29962e+07	2.55522e+07	2.21225e+07	3.51346e+07	5.77724e+07	5.54495e+07
0.737_375.3134	Docosatetraenoylethanolamide	C24 H41 N O2	375.313	0.737	C13829	S4445444	HMDB0013626			level4	Organic nitrogen compounds	Organonitrogen compounds	Amines	NULL	3.81676e+06	2.9649e+06	2.86384e+06	3.4676e+06	3.60384e+06	3.49774e+06	3.13017e+06	3.45584e+06	2.60227e+06	3.95347e+06	3.49359e+06	404497	1.50593e+06	337887	1.98098e+06	298844	3.21716e+07	1.91043e+07	7.93635e+06	2.43518e+07	9.29299e+06	301446	1.00638e+06	310990	1.79177e+07	3.38991e+06
0.737_399.3134		C26 H41 N O2	399.313	0.737						level5					8.70339e+06	7.34014e+06	6.72932e+06	1.00414e+07	9.0728e+06	8.19671e+06	8.36192e+06	7.82631e+06	8.00267e+06	8.75345e+06	8.30554e+06	160760	2.69008e+06	302374	1.09056e+06	252494	6.38308e+07	4.23148e+07	1.35895e+07	6.50953e+07	1.75142e+07	273992	286711	587293	2.69109e+07	2.59093e+06
0.738_420.3098		C21 H45 N2 O4 P	420.31	0.738						level5					3.05549e+06	2.69687e+06	2.68181e+06	3.47827e+06	2.86118e+06	2.83856e+06	3.11725e+06	2.74894e+06	2.95105e+06	3.04042e+06	2.90516e+06	2.35912e+06	3.23719e+06	3.23225e+06	3.18346e+06	1.41536e+06	1.88217e+07	1.80845e+07	6.95738e+06	1.58475e+07	6.84827e+06	1.87032e+06	4.42018e+06	1.68929e+06	2.2983e+06	9.70698e+06
0.738_421.2979	Paspaline	C28 H39 N O2	421.298	0.738	C20530	S102950				level4	Fungal toxins	Mycotoxins	Indole diterpene alkaloids	map01100 Metabolic pathways;	270296	270296	270296	270296	270296	270296	270296	270296	270296	270296	270296	407059	704870	783552	529192	537583	861452	3.26123e+06	380013	1.32015e+06	916534	743525	604738	907854	1.1392e+06	496583
0.738_529.3409		C31 H47 N O6	529.341	0.738						level5					1.18428e+06	1.3014e+06	1.12776e+06	1.20266e+06	1.18504e+06	1.21619e+06	1.20653e+06	1.2187e+06	1.05921e+06	1.29233e+06	1.23814e+06	1.26438e+06	419639	1.21409e+06	632025	567849	603224	348304	558318	695028	780103	772795	507266	240907	700053	488761
0.739_309.3028	1-hexadecanoylpyrrolidine	C20 H39 N O	309.303	0.739		S216397	HMDB0032740		58.8	level4	Organoheterocyclic compounds	Pyrrolidines	N-acylpyrrolidines		6.0947e+08	6.32348e+08	4.13256e+08	6.52169e+08	6.09812e+08	5.97405e+08	6.31381e+08	5.47165e+08	5.72391e+08	6.05709e+08	5.60393e+08	7.65564e+08	1.45921e+09	2.21627e+09	1.94458e+09	1.39219e+09	1.79253e+09	1.87694e+09	7.07338e+08	1.55431e+09	1.67465e+09	1.48516e+09	9.98841e+08	1.96283e+09	1.32333e+09	1.69918e+09
0.74_397.2979		C20 H40 N5 O P	397.298	0.74						level5					356432	428616	394103	519653	384289	440882	432788	356910	398518	512113	381207	534823	896237	1.12188e+06	966107	939028	6.63759e+06	2.85173e+06	505192	6.23015e+06	971550	1.01245e+06	997121	1.08267e+06	2.61599e+06	962364
0.74_502.3126		C19 H46 N6 O7 S	502.313	0.74						level5					1.12396e+07	1.16454e+07	8.36305e+06	9.48663e+06	1.17373e+07	1.06932e+07	1.17353e+07	9.40034e+06	1.1096e+07	9.983e+06	1.07388e+07	1.50792e+07	1.10046e+07	2.6263e+07	1.04812e+07	1.22313e+07	1.0789e+07	8.12778e+06	8.51312e+06	1.04681e+07	9.31282e+06	1.30843e+07	9.50076e+06	7.90476e+06	1.13619e+07	1.3385e+07
0.741_207.1625	246i1d7tdl	C13 H21 N O	207.162	0.741		S30778574	HMDB0060611			level4	Benzenoids	Benzene and substituted derivatives	Phenylpropanes		3.27438e+06	4.39519e+06	3.67317e+06	4.26641e+06	3.88512e+06	4.31547e+06	3.7756e+06	4.93105e+06	3.45948e+06	4.86402e+06	2.90908e+06	5.93679e+06	5.83063e+06	3.22966e+06	3.86607e+06	5.31409e+06	8.51446e+06	7.53925e+06	5.03835e+06	4.22855e+06	2.0215e+06	5.55887e+06	2.90776e+06	1.48355e+07	1.77837e+06	6.69689e+06
0.741_295.2874		C19 H37 N O	295.287	0.741						level5					3.2807e+07	3.05083e+07	3.30073e+07	2.65797e+07	3.79034e+07	3.22163e+07	3.28625e+07	2.81882e+07	3.2427e+07	2.95444e+07	3.68609e+07	3.85399e+07	9.09677e+07	1.68267e+08	1.4345e+08	1.24481e+08	1.2093e+08	1.08854e+08	5.89836e+07	8.65131e+07	1.33189e+08	1.16024e+08	1.06767e+08	1.63802e+08	9.36265e+07	1.01111e+08
0.741_304.2397	Icosa-5,8,11,14-tetraenoic acid	C20 H32 O2	304.24	0.741		S4471967				level4					5.35083e+06	3.40144e+06	3.04506e+06	6.73741e+06	3.83116e+06	4.28376e+06	4.2597e+06	4.12776e+06	4.79613e+06	4.0853e+06	4.14033e+06	4.62636e+06	3.30589e+06	3.88621e+06	2.26058e+07	1.37178e+07	2.84238e+07	5.35566e+06	6.34274e+06	4.69756e+06	7.751e+06	1.29915e+07	6.47e+07	7.49599e+06	2.66596e+07	1.60976e+07
0.741_375.2518		C21 H33 N3 O3	375.252	0.741						level5					1.81053e+07	2.54532e+07	1.64898e+07	2.19253e+07	2.18367e+07	2.59568e+07	1.82631e+07	2.06436e+07	1.82227e+07	2.40851e+07	2.07726e+07	1.89984e+08	1.78404e+08	2.16522e+08	1.17334e+08	1.48345e+08	1.61127e+08	1.08897e+08	7.36609e+07	1.16983e+08	1.15627e+08	2.07141e+08	2.96406e+08	1.16672e+08	1.44762e+08	4.89981e+08
0.742_373.2978	(5z,8z,11z,14z)-1-(4-morpholinyl)-5,8,11,14-icosatetraen-1-one	C24 H39 N O2	373.298	0.742		S4446553				level4					711493	766498	575695	836309	688875	718452	700544	713060	700100	726189	706277	198925	2.28884e+06	431421	1.0124e+06	333192	4.75006e+06	4.40559e+06	2.06522e+06	2.56588e+06	2.65165e+06	298137	1.46201e+06	309364	2.87602e+06	396338
0.742_484.2825	Stigmatellin y	C29 H40 O6	484.283	0.742	C12150	S4445302				level4				NULL	7.37688e+07	7.67533e+07	7.98022e+07	7.52383e+07	7.61554e+07	7.63729e+07	7.66782e+07	7.75633e+07	6.90655e+07	7.78265e+07	8.07248e+07	8.32236e+07	5.24678e+07	1.65164e+08	7.29453e+07	7.429e+07	7.94102e+07	4.98013e+07	8.59477e+07	1.05385e+08	9.91465e+07	7.8256e+07	6.44464e+07	4.72649e+07	7.70464e+07	9.89172e+07
0.743_303.2557	Cis-fenpropimorph	C20 H33 N O	303.256	0.743		S82798				level4					1.66058e+06	1.86173e+06	1.21306e+06	1.42927e+06	1.33206e+06	1.85105e+06	1.50042e+06	1.42616e+06	1.35442e+06	1.59726e+06	1.64152e+06	2.81596e+06	2.68997e+06	3.6104e+06	3.90572e+06	3.56536e+06	3.15782e+06	2.0359e+06	1.29779e+06	2.57065e+06	2.85707e+06	7.15163e+06	1.04034e+07	2.02701e+06	3.56183e+06	1.59972e+06
0.743_351.2407		C20 H33 N O4	351.241	0.743					31.2	level5					421176	842863	877195	735906	805099	387033	818707	878078	351404	813960	841460	2.6041e+06	1.68357e+06	665689	2.12174e+06	2.23484e+06	647758	1.22873e+06	357237	659047	577409	2.56559e+06	7.06917e+06	3.70014e+06	1.18279e+06	2.21866e+06
0.744_657.4964		C40 H67 N O6	657.496	0.744						level5					404297	484155	423919	463991	527845	448555	486848	422975	480256	441813	464520	595286	987462	1.23395e+06	1.09635e+06	1.03637e+06	1.22235e+06	1.09239e+06	562615	1.10293e+06	1.14488e+06	1.11352e+06	1.85761e+06	3.03209e+06	948391	1.26272e+06
0.745_283.2871	Amide c18	C18 H37 N O	283.287	0.745	C13846	S29032	HMDB0034146			level4	Organic acids and derivatives	Carboximidic acids and derivatives	Carboximidic acids	NULL	1.30166e+08	1.10478e+08	9.66389e+07	1.88974e+08	1.16361e+08	1.23717e+08	1.50467e+08	1.25133e+08	1.33736e+08	9.55722e+07	1.41218e+08	1.81614e+08	6.84567e+08	5.20106e+08	6.36941e+08	4.83266e+08	5.02503e+08	6.81972e+08	1.2893e+08	7.52434e+08	5.57251e+08	2.94026e+08	2.29926e+08	7.01084e+08	4.70886e+08	6.15582e+08
0.745_392.2783		C21 H36 N4 O3	392.278	0.745						level5					1.4065e+07	1.82162e+07	1.27985e+07	1.82114e+07	1.74764e+07	2.10754e+07	1.33233e+07	1.61715e+07	1.37143e+07	1.91825e+07	1.65541e+07	1.42559e+08	1.33856e+08	1.57979e+08	7.96335e+07	1.13788e+08	1.23362e+08	8.85588e+07	5.40516e+07	8.70033e+07	9.18003e+07	1.38449e+08	2.20511e+08	9.03453e+07	1.11818e+08	3.3787e+08
0.746_162.141	Hexylbenzene	C12 H18	162.141	0.746		S13487	HMDB0061815			level4	Benzenoids	Benzene and substituted derivatives	null		3.96128e+06	2.15514e+06	2.38531e+06	3.07864e+06	2.47628e+06	2.56428e+06	2.76985e+06	2.28837e+06	2.43416e+06	4.10818e+06	2.42255e+06	3.18747e+06	9.24429e+06	6.26631e+06	1.08371e+07	9.9247e+06	6.72901e+06	1.07466e+07	4.45003e+06	4.62067e+06	7.50852e+06	6.92422e+06	7.16126e+06	1.08249e+07	4.41498e+06	1.22247e+07
0.746_304.1669	Prosolanapyrone ii	C18 H24 O4	304.167	0.746	C19933	S9997508				level4				NULL	1.0993e+06	1.56157e+06	1.21754e+06	1.73767e+06	1.36413e+06	1.3478e+06	1.37799e+06	1.29277e+06	1.35502e+06	1.45841e+06	1.35034e+06	3.10577e+06	1.00973e+06	2.11944e+06	2.64269e+06	2.54641e+06	885675	1.40547e+06	702876	1.0922e+06	929258	2.22082e+06	3.90916e+06	4.71328e+06	1.86991e+06	4.12661e+06
0.746_330.2768	1728235	C19 H38 O4	330.277	0.746		S14201				level4					868654	868654	868653	868654	868654	868654	868654	868654	868654	868654	868654	224006	349374	499992	451885	461208	4.17219e+06	376798	220445	3.84984e+06	565674	1.56291e+06	453624	2.88998e+07	477678	518140
0.746_611.5123		C37 H65 N5 O2	611.512	0.746						level5					1.03001e+06	1.02243e+06	1.66987e+06	1.20027e+06	1.22247e+06	1.10512e+06	1.51735e+06	1.16022e+06	1.18559e+06	1.19191e+06	1.15616e+06	964607	1.38455e+06	2.05047e+06	2.80291e+06	2.17425e+06	1.73595e+06	2.54182e+06	949547	1.49e+06	1.56054e+06	4.29659e+06	3.82614e+06	6.2539e+06	1.98293e+06	4.13436e+06
0.747_180.1515	(e,e)-2,4-dodecadienal	C12 H20 O	180.151	0.747		S4519024	HMDB0039590			level4	Organic oxygen compounds	Organooxygen compounds	Carbonyl compounds		1.07691e+07	1.08944e+07	1.78872e+07	1.3812e+07	1.5494e+07	1.17172e+07	1.2436e+07	1.17958e+07	1.24898e+07	1.75682e+07	1.20079e+07	2.20684e+07	2.31254e+07	2.27269e+07	2.78173e+07	2.67154e+07	3.48197e+07	3.7326e+07	2.11377e+07	3.25614e+07	2.36543e+07	2.71745e+07	2.27033e+07	3.71065e+07	1.80375e+07	2.99648e+07
0.747_197.1781		C12 H23 N O	197.178	0.747						level5					7.14298e+06	7.52846e+06	1.40844e+07	9.16819e+06	1.17176e+07	8.17387e+06	8.85367e+06	8.52051e+06	8.68797e+06	1.24064e+07	8.52389e+06	1.69242e+07	1.63391e+07	1.57211e+07	1.72214e+07	1.61806e+07	2.62102e+07	2.49546e+07	1.54397e+07	2.52823e+07	1.52177e+07	1.91006e+07	1.48691e+07	2.22609e+07	1.29415e+07	1.91261e+07
0.747_312.2661	2-oxononadecanoic acid	C19 H36 O3	312.266	0.747		S4472343				level4					830435	774428	606088	673772	856362	776624	796185	717422	715285	793508	730357	328895	537204	660848	557299	546141	3.82378e+06	598444	279291	3.10306e+06	689218	1.72951e+06	576303	3.73102e+07	606165	589550
0.747_562.5434		C36 H70 N2 O2	562.543	0.747						level5					1.3551e+08	8.91763e+07	1.12232e+08	8.74532e+07	1.27211e+08	1.05774e+08	1.39695e+08	9.60286e+07	9.01522e+07	9.95084e+07	1.42474e+08	1.4857e+08	2.95922e+08	5.22436e+08	3.50127e+08	3.40331e+08	3.91013e+08	3.65442e+08	1.97689e+08	2.50368e+08	4.21474e+08	3.71975e+08	3.57635e+08	4.32452e+08	2.66083e+08	3.87822e+08
0.748_393.3452		C22 H43 N5 O	393.345	0.748						level5					375887	368378	481512	333072	396687	387131	388617	392104	369650	406769	384536	284408	875392	1.00372e+06	390703	747914	989647	1.35588e+06	2.8269e+06	2.48934e+06	5.59198e+06	875123	1.29068e+06	691128	753890	590270
0.749_246.2345	Estrane	C18 H30	246.234	0.749	C19641	S4574149				level4				NULL	9.07132e+06	9.006e+06	9.03013e+06	9.36247e+06	8.94533e+06	9.0575e+06	9.08821e+06	9.04238e+06	9.37867e+06	8.6801e+06	9.2302e+06	1.20846e+07	2.68186e+07	3.75927e+07	3.05495e+07	3.21926e+07	3.49377e+07	1.95809e+07	1.42006e+07	2.43383e+07	2.04208e+07	2.98569e+07	2.01505e+07	3.67116e+07	1.90812e+07	2.7031e+07
0.749_264.245	9,12-octadecadienal	C18 H32 O	264.245	0.749		S4446504				level4					3.93954e+09	5.4665e+09	6.35094e+09	4.41067e+09	3.87425e+09	6.03811e+09	3.93845e+09	3.84962e+09	7.14501e+09	4.37212e+09	4.52126e+09	7.37538e+09	1.28146e+10	2.01444e+10	1.25043e+10	1.33809e+10	1.73675e+10	1.09251e+10	9.25901e+09	1.66638e+10	1.68728e+10	1.0306e+10	1.29007e+10	1.79725e+10	1.00825e+10	1.42899e+10
0.751_178.1359	Propofol	C12 H18 O	178.136	0.751	C07523	S4774	HMDB0014956			level4	Benzenoids	Benzene and substituted derivatives	Cumenes	NULL	2.19705e+06	1.67377e+06	1.93849e+06	1.65252e+06	1.52954e+06	1.87276e+06	1.63441e+06	3.00676e+06	1.50451e+06	1.99586e+06	1.33824e+06	3.96484e+06	2.59212e+06	3.59451e+06	2.76334e+06	2.42642e+06	3.85596e+06	3.90292e+06	1.47195e+06	3.82909e+06	3.27101e+06	7.84699e+06	4.75669e+06	9.84874e+06	2.64343e+06	4.19159e+06
0.751_400.3336	Mfcd00010474	C27 H44 O2	400.334	0.751		S82599				level4					288198	288198	288198	288198	288198	288198	288198	288198	288198	288198	288198	686615	763688	676556	323318	376105	320722	907285	250043	405762	515136	6.37659e+06	2.25976e+06	1.08317e+07	381427	960759
0.751_517.4863		C34 H63 N O2	517.486	0.751						level5					917244	949770	899125	855753	868526	914004	949744	841481	804345	1.14162e+06	824099	729438	3.7918e+06	3.6675e+06	2.833e+06	1.4778e+06	3.6848e+06	3.64489e+06	803737	1.10662e+07	1.34771e+07	3.12379e+06	1.71152e+06	3.49731e+06	3.18402e+06	1.97668e+06
0.752_353.3291	N-gondoylethanolamine	C22 H43 N O2	353.329	0.752		S4446572				level4					3.24056e+07	3.38004e+07	3.19464e+07	3.48576e+07	3.49844e+07	3.3571e+07	3.25872e+07	3.07704e+07	3.88798e+07	3.27317e+07	3.22245e+07	4.21101e+07	5.84058e+07	7.50948e+07	4.4618e+07	3.64366e+07	5.99301e+07	6.08512e+07	3.29726e+07	6.3887e+07	4.68977e+07	3.65215e+07	3.17305e+07	1.65454e+07	4.92829e+07	4.56168e+07
0.753_183.1624	(2,7-dimethyloctahydro-1h-cyclopenta[c]pyridin-4-yl)methanol	C11 H21 N O	183.162	0.753	C09989	S107811				level4				NULL	4.18086e+06	4.46704e+06	4.70634e+06	4.57753e+06	6.82959e+06	4.84504e+06	4.25026e+06	4.73905e+06	7.731e+06	4.07817e+06	3.86015e+06	6.08487e+06	1.11765e+07	1.39744e+07	1.28086e+07	9.86369e+06	1.42545e+07	1.00238e+07	1.07657e+07	1.12317e+07	2.06596e+07	1.36131e+07	8.20129e+06	1.40279e+07	9.53495e+06	1.01048e+07
0.753_82.0783	3-methylcyclopentene	C6 H10	82.0783	0.753		S13625	HMDB0031544			level4	Hydrocarbons	Unsaturated hydrocarbons	Olefins		6.86108e+06	4.35983e+06	4.12957e+06	7.12111e+06	4.40709e+06	4.13232e+06	6.56777e+06	4.09611e+06	4.93562e+06	6.59203e+06	4.84942e+06	6.26075e+06	1.02148e+07	2.10511e+07	2.08383e+07	1.1404e+07	1.02326e+07	1.57024e+07	1.11405e+07	1.20858e+07	1.21803e+07	1.81686e+07	1.86111e+07	1.38266e+07	9.73751e+06	1.58574e+07
0.755_169.1468	(-)-lupinine	C10 H19 N O	169.147	0.755	C10773	S82587				level4	Alkaloids	Alkaloids derived from lysine	Quinolizidine alkaloids		3.81677e+06	3.78117e+06	4.54158e+06	4.23178e+06	3.9334e+06	3.6481e+06	4.03782e+06	3.65132e+06	4.29708e+06	4.16012e+06	3.96183e+06	6.75451e+06	7.81629e+06	1.17362e+07	1.08553e+07	9.34363e+06	1.13508e+07	1.087e+07	5.68306e+06	1.00434e+07	1.09954e+07	8.43582e+06	7.30054e+06	1.55896e+07	1.13385e+07	9.76073e+06
0.755_262.2296	Sl3675000	C18 H30 O	262.23	0.755	C14245	S59421				level4				NULL	6.52437e+08	6.86308e+08	6.34076e+08	6.99015e+08	6.62326e+08	6.70383e+08	6.70496e+08	6.25005e+08	6.78617e+08	6.91523e+08	6.62731e+08	1.21069e+09	1.42821e+09	2.07471e+09	2.04992e+09	2.36412e+09	1.96023e+09	1.76853e+09	1.2049e+09	1.76284e+09	1.93263e+09	1.54094e+09	1.37026e+09	2.01582e+09	1.60508e+09	1.72013e+09
0.755_267.2562		C17 H33 N O	267.256	0.755						level5					5.66914e+06	6.9909e+06	6.25427e+06	7.18193e+06	5.56494e+06	6.72983e+06	6.39888e+06	6.00916e+06	7.19969e+06	6.02073e+06	6.07142e+06	9.89552e+06	1.1e+07	2.21953e+07	1.90366e+07	1.41354e+07	2.41593e+07	1.30696e+07	7.89197e+06	1.57955e+07	1.5596e+07	1.74772e+07	1.54083e+07	1.81183e+07	1.40779e+07	1.86313e+07
0.755_558.5123		C36 H66 N2 O2	558.512	0.755						level5					5.84682e+06	3.93835e+06	4.81512e+06	4.81049e+06	7.12143e+06	5.07791e+06	4.71877e+06	5.61676e+06	4.83782e+06	6.56316e+06	4.18184e+06	8.4358e+06	1.04129e+07	1.86141e+07	2.32993e+07	1.5725e+07	1.47719e+07	2.04601e+07	8.46704e+06	1.62399e+07	1.53441e+07	1.50198e+07	8.7884e+06	2.38712e+07	2.35743e+07	1.45182e+07
0.756_536.5294		C34 H68 N2 O2	536.529	0.756						level5					1.08677e+07	8.10282e+06	9.79041e+06	8.58306e+06	1.33343e+07	8.78427e+06	9.61222e+06	8.73807e+06	1.00766e+07	1.0426e+07	1.01745e+07	1.56135e+07	2.63561e+07	5.05348e+07	4.34558e+07	3.53757e+07	3.81941e+07	3.77476e+07	1.47592e+07	2.79482e+07	3.50805e+07	3.89369e+07	1.77829e+07	5.5749e+07	3.94269e+07	3.37711e+07
0.757_662.4463		C32 H62 N4 O10	662.446	0.757						level5					4.62868e+06	6.53168e+06	4.32862e+06	4.20823e+06	3.33911e+06	4.926e+06	4.65628e+06	5.36003e+06	4.0472e+06	3.84203e+06	5.3021e+06	4.91317e+06	2.53607e+07	2.25229e+07	3.27591e+07	2.00733e+07	1.37342e+07	7.18439e+07	8.40701e+06	1.43084e+07	4.71013e+07	3.15357e+07	4.78527e+07	5.66064e+07	7.11848e+07	5.85691e+07
0.759_348.266	Anacardic acid	C22 H36 O3	348.266	0.759	C10759	S146579	HMDB0029683			level4	Benzenoids	Benzene and substituted derivatives	Benzoic acids and derivatives	NULL	1.1974e+08	7.90299e+07	7.52794e+07	9.0291e+07	1.43706e+08	7.88235e+07	8.06241e+07	1.08919e+08	9.21409e+07	1.09219e+08	8.78986e+07	2.76762e+08	3.56015e+08	3.35146e+08	5.44549e+08	3.11873e+08	2.73992e+08	4.02448e+08	9.44137e+07	1.68207e+08	1.12257e+08	3.85765e+08	3.05444e+08	4.40899e+08	3.2034e+08	2.97431e+08
0.759_421.3561		C26 H47 N O3	421.356	0.759						level5					2.25604e+06	1.39122e+06	1.80144e+06	1.72492e+06	2.8515e+06	1.98847e+06	1.98418e+06	1.76173e+06	2.26319e+06	1.56263e+06	2.1764e+06	3.42841e+06	6.48269e+06	5.12564e+06	4.90313e+06	4.36019e+06	1.27826e+07	3.63977e+06	4.51796e+06	5.47856e+06	7.96982e+06	1.54272e+07	5.64243e+06	4.39357e+06	3.64227e+06	3.41161e+06
0.76_397.3557	N-docosanoylglycine	C24 H47 N O3	397.356	0.76		S15487852	HMDB0013219			level4	Organic acids and derivatives	Carboxylic acids and derivatives	Amino acids, peptides, and analogues		3.47835e+06	4.7462e+06	3.21765e+06	3.65171e+06	3.58921e+06	3.84638e+06	4.27684e+06	3.20593e+06	4.17145e+06	3.84101e+06	3.48291e+06	3.15957e+06	9.20415e+06	9.43001e+06	1.0441e+07	1.03582e+07	5.51528e+06	1.00952e+07	3.81537e+06	6.22764e+06	8.20782e+06	5.37324e+07	3.67038e+07	4.58024e+06	1.49187e+07	4.8213e+06
0.76_419.342		C25 H46 N3 P	419.342	0.76						level5					1.53121e+07	1.72887e+07	1.65845e+07	1.65051e+07	1.63515e+07	1.62849e+07	1.62061e+07	1.59371e+07	1.93046e+07	1.49727e+07	1.57341e+07	1.79557e+07	2.15493e+07	3.89844e+07	3.81769e+07	3.80031e+07	1.95062e+07	2.78108e+07	1.78851e+07	1.97873e+07	3.52665e+07	1.35342e+08	1.45465e+08	1.27299e+07	3.14286e+07	1.54034e+07
0.76_441.3239		C28 H43 N O3	441.324	0.76						level5					1.35284e+07	1.55386e+07	1.4984e+07	1.46362e+07	1.45776e+07	1.45308e+07	1.44628e+07	1.42088e+07	1.73459e+07	1.33922e+07	1.39529e+07	1.61244e+07	1.8589e+07	3.44567e+07	3.09164e+07	3.17979e+07	1.68352e+07	2.38591e+07	1.60536e+07	1.70623e+07	3.13798e+07	1.16994e+08	1.28144e+08	1.11849e+07	2.79676e+07	1.31568e+07
0.76_443.3417		C28 H45 N O3	443.342	0.76						level5					730496	779969	699511	919497	475770	772682	603876	674344	778004	707798	730555	544998	524636	1.89183e+06	1.62043e+06	1.65964e+06	1.95218e+06	2.26167e+06	1.08767e+06	618809	1.87296e+06	7.59725e+06	1.46352e+07	835343	2.55027e+06	1.44315e+06
0.761_213.1731	[similar to: 8-isoprostaglandin f1β; δmass: -143.0832 da]		213.173	0.761						level5					2.46993e+06	2.10162e+06	2.00311e+06	2.04112e+06	2.31046e+06	2.29186e+06	2.47259e+06	1.69676e+06	2.60456e+06	2.42471e+06	1.97911e+06	3.07294e+06	4.41702e+06	4.04948e+06	3.18833e+06	3.37011e+06	6.58135e+06	4.71285e+06	2.25263e+06	6.09275e+06	3.1646e+06	3.57756e+06	2.60073e+06	4.9873e+06	3.39631e+06	4.1903e+06
0.761_437.3712		C24 H47 N5 O2	437.371	0.761						level5					748287	966358	524665	871811	781140	767710	762474	734781	874736	683228	771871	1.45594e+06	763954	547957	1.17971e+06	307391	3.36047e+06	490135	8.27475e+06	9.15167e+06	1.19102e+07	595945	4.52004e+06	577327	1.22139e+06	420717
0.762_417.324	N-oleoyl dopamine	C26 H43 N O3	417.324	0.762	C12272	MReference-4432			39.9	level3				map04080 Neuroactive ligand-receptor interaction;	2.22636e+07	2.58787e+07	2.10775e+07	2.19478e+07	2.84248e+07	2.48444e+07	2.33721e+07	2.42678e+07	2.7484e+07	1.91593e+07	2.50848e+07	2.75174e+07	3.42409e+07	6.73261e+07	4.95828e+07	4.73791e+07	2.13865e+07	5.83704e+07	2.77035e+07	2.17126e+07	4.57411e+07	2.2614e+08	2.45707e+08	3.22579e+07	6.48333e+07	2.80694e+07
0.763_395.3396		C24 H45 N O3	395.34	0.763						level5					2.40416e+07	2.01361e+07	2.74677e+07	2.3041e+07	2.13391e+07	2.51789e+07	2.34476e+07	2.16706e+07	2.73124e+07	2.03877e+07	2.3691e+07	1.77498e+07	6.51529e+07	7.89772e+07	6.70616e+07	5.78029e+07	3.44881e+07	5.28342e+07	2.31234e+07	3.30235e+07	4.50557e+07	1.1095e+08	1.06796e+08	2.76167e+07	4.3172e+07	2.81571e+07
0.763_395.3419		C23 H46 N3 P	395.342	0.763					38.9	level5					2.22636e+07	2.58787e+07	2.10775e+07	2.19478e+07	2.84248e+07	2.48444e+07	2.33721e+07	2.42678e+07	2.7484e+07	1.91593e+07	2.50848e+07	2.75174e+07	3.42409e+07	6.73261e+07	4.95828e+07	4.73791e+07	2.13865e+07	5.83704e+07	2.77035e+07	2.17126e+07	4.57411e+07	2.2614e+08	2.45707e+08	3.22579e+07	6.48333e+07	2.80694e+07
0.764_451.3874		C25 H49 N5 O2	451.387	0.764						level5					413566	867072	688178	477620	1.08135e+06	737977	545214	464603	798007	792496	628492	1.97429e+06	1.80792e+06	1.54235e+06	1.6464e+06	7.90387e+06	3.57023e+06	1.23183e+06	1.22038e+06	1.7169e+06	2.87159e+06	7.84637e+06	1.09354e+06	1.84438e+06	894230	2.76464e+06
0.765_321.2664	Dihexyverine	C20 H35 N O2	321.266	0.765		S20478				level4					5.18962e+06	3.83007e+06	5.85424e+06	5.67083e+06	5.05851e+06	4.97606e+06	4.94167e+06	4.88402e+06	5.04546e+06	5.85859e+06	4.50444e+06	8.12284e+06	5.50277e+06	1.9745e+07	1.10142e+07	1.89581e+07	1.1969e+07	5.26608e+06	4.11845e+06	8.58795e+06	5.55493e+06	1.89431e+07	3.78727e+07	6.39614e+06	2.20177e+07	7.28536e+06
0.765_326.2091	Mfcd03411993	C18 H30 O5	326.209	0.765	C14794	S7827804				level4	FA Fatty acyls	FA03 Eicosanoids	FA0301 Prostaglandins	map00590 Arachidonic acid metabolism;	1.92023e+06	1.17522e+06	1.06966e+06	1.24245e+06	1.13881e+06	1.59745e+06	1.37296e+06	1.81078e+06	1.04129e+06	1.30611e+06	1.22425e+06	2.33701e+06	1.66211e+06	1.70377e+06	1.79375e+06	494393	2.0286e+06	2.1483e+06	1.09893e+06	1.73492e+06	1.05981e+06	4.13244e+06	2.24417e+06	1.0437e+07	2.94054e+06	4.92029e+06
0.766_383.3398		C23 H45 N O3	383.34	0.766						level5					4.9653e+06	2.11081e+06	2.56047e+06	3.78394e+06	2.8605e+06	2.97105e+06	3.08682e+06	2.52858e+06	3.31826e+06	3.04928e+06	3.56693e+06	2.25022e+06	1.66257e+07	1.15486e+07	9.23734e+06	9.94184e+06	7.33683e+06	7.32362e+06	2.78236e+06	4.40153e+06	6.00449e+06	4.7088e+07	3.40912e+07	6.51924e+06	1.4948e+07	4.96902e+06
0.766_403.3457	(5z,8z,11z,14z)-n-(2-hydroxyethyl)-17,17-dimethyl-5,8,11,14-docosatetraenamide	C26 H45 N O2	403.346	0.766		S4446583				level4					1.97845e+06	2.44825e+06	2.04153e+06	2.50027e+06	2.08426e+06	2.02736e+06	2.22753e+06	1.63344e+06	2.94407e+06	2.00519e+06	2.26838e+06	5.36572e+06	6.79725e+06	1.05098e+07	1.15393e+07	8.37315e+06	1.0025e+07	1.0114e+07	2.19636e+06	8.20177e+06	4.13454e+06	1.05314e+07	1.53583e+07	6.62047e+06	7.41841e+06	1.3972e+07
0.767_251.2248	Pumiliotoxin 251d	C16 H29 N O	251.225	0.767	C20031	S4944741				level4	Venoms	Frog venoms	Alkaloids	NULL	3.86899e+06	2.74667e+06	2.27004e+06	3.5163e+06	3.71617e+06	3.15876e+06	2.71877e+06	3.21977e+06	3.36387e+06	2.92828e+06	3.2896e+06	6.0768e+06	7.26567e+06	1.37823e+07	9.5701e+06	7.17049e+06	9.31995e+06	7.46816e+06	5.84782e+06	7.4583e+06	9.10894e+06	6.09473e+06	4.68463e+06	8.33718e+06	7.16418e+06	7.18761e+06
0.767_324.2665	(11s,12e,14z)-11-hydroxy-12,14-icosadienoic acid	C20 H36 O3	324.267	0.767		S4445831				level4					1.10389e+06	1.10389e+06	1.10389e+06	1.10389e+06	1.10389e+06	1.10389e+06	1.10389e+06	1.10389e+06	1.10389e+06	1.10389e+06	1.10389e+06	1.88146e+06	1.20104e+06	1.8044e+06	2.68199e+06	2.03972e+06	2.19764e+06	1.10449e+06	1.69687e+06	1.72713e+06	2.22935e+06	2.55187e+06	1.99589e+06	2.04067e+06	2.15201e+06	2.62115e+06
0.767_367.2356			367.236	0.767						level5					2.06624e+06	2.06624e+06	2.06624e+06	2.06624e+06	2.06624e+06	2.06624e+06	2.06624e+06	2.06624e+06	2.06624e+06	2.06624e+06	2.06624e+06	4.19346e+06	5.39905e+06	4.38738e+06	3.60861e+06	5.15756e+06	3.25717e+06	2.53792e+06	1.72176e+06	2.6772e+06	2.5812e+06	6.63977e+06	1.1629e+07	1.01206e+07	2.35224e+06	1.65904e+07
0.767_393.324		C24 H43 N O3	393.324	0.767					57.1	level5					2.59433e+07	1.63812e+07	2.36036e+07	2.35965e+07	1.60094e+07	2.211e+07	2.07388e+07	2.04805e+07	2.53695e+07	1.5786e+07	2.32756e+07	1.57667e+07	3.61007e+07	3.50433e+07	3.19654e+07	3.41195e+07	3.77964e+07	3.65131e+07	2.7277e+07	3.51547e+07	4.61824e+07	2.21372e+08	2.07783e+08	3.26963e+07	5.61652e+07	2.94542e+07
0.767_406.3296		C22 H46 O6	406.33	0.767						level5					2.10886e+06	1.93946e+06	1.93902e+06	2.02847e+06	2.59023e+06	2.05886e+06	2.0484e+06	2.14404e+06	2.07747e+06	2.03711e+06	2.14562e+06	3.752e+06	4.77475e+06	5.63356e+06	6.39224e+06	1.04473e+07	1.27372e+07	3.71376e+06	4.76142e+06	6.07694e+06	6.67441e+06	8.34522e+06	1.54069e+07	3.97273e+06	4.61798e+06	4.82883e+06
0.768_362.2203	Calpeptin	C20 H30 N2 O4	362.22	0.768	C11256	S66091				level4				NULL	146001	207898	153018	217531	153625	189483	212255	140560	210729	144082	191373	695129	3.87851e+07	605476	565565	423782	497214	438055	212919	431927	645409	587451	563418	600216	460539	576519
0.768_369.3239	4-(stearoylamino)butanoic acid	C22 H43 N O3	369.324	0.768		S142829	HMDB0062341			level4	Organic acids and derivatives	Carboxylic acids and derivatives	Amino acids, peptides, and analogues		7.82356e+07	5.99882e+07	7.62073e+07	7.92575e+07	6.14299e+07	6.52294e+07	7.06162e+07	6.46655e+07	8.83569e+07	5.48938e+07	7.76781e+07	5.65691e+07	2.07379e+08	1.71405e+08	1.81963e+08	1.81684e+08	1.17586e+08	1.85145e+08	7.11128e+07	1.26311e+08	1.17407e+08	4.34518e+08	3.48164e+08	1.32443e+08	1.85658e+08	1.32233e+08
0.77_227.225		C14 H29 N O	227.225	0.77						level5					4.50459e+06	3.64639e+06	3.46288e+06	4.39344e+06	4.11208e+06	3.83406e+06	4.0137e+06	3.47645e+06	4.42262e+06	3.92382e+06	4.12132e+06	6.26692e+06	8.90978e+06	9.65726e+06	1.2004e+07	9.79525e+06	1.08931e+07	1.03445e+07	6.72958e+06	1.02074e+07	1.20207e+07	1.0205e+07	5.51939e+06	1.15927e+07	1.06007e+07	1.01497e+07
0.77_253.2405		C16 H31 N O	253.24	0.77						level5					3.08081e+07	3.1084e+07	2.94597e+07	3.165e+07	3.05378e+07	3.07412e+07	3.06799e+07	3.0376e+07	3.16817e+07	3.02175e+07	3.05468e+07	5.65266e+07	6.51191e+07	1.34216e+08	9.43733e+07	6.97086e+07	9.4301e+07	7.06013e+07	5.48535e+07	8.37207e+07	9.1313e+07	6.38662e+07	3.88133e+07	8.73532e+07	7.90284e+07	7.63615e+07
0.77_453.3267		C26 H49 N O P2	453.327	0.77						level5					3.41964e+07	2.9098e+07	3.37304e+07	3.30059e+07	3.18143e+07	2.79201e+07	3.41229e+07	2.60556e+07	3.65124e+07	3.12389e+07	3.39223e+07	2.95082e+07	6.24869e+07	6.39851e+07	1.06334e+08	8.46939e+07	4.61559e+07	6.90425e+07	3.88115e+07	4.48433e+07	4.63674e+07	3.4698e+08	2.96637e+08	4.63273e+07	1.05954e+08	3.22008e+07
0.771_371.2821	Synaptamide	C24 H37 N O2	371.282	0.771		S4446571	HMDB0013658			level4	Organic nitrogen compounds	Organonitrogen compounds	Amines		2.09908e+06	1.45218e+06	1.86934e+06	1.64765e+06	1.8883e+06	1.64736e+06	1.79322e+06	1.51447e+06	2.15542e+06	1.51383e+06	1.94507e+06	3.71307e+06	4.14281e+06	6.37655e+06	7.60437e+06	5.50027e+06	4.80887e+06	1.99379e+06	3.90995e+06	3.91353e+06	6.09676e+06	7.91378e+06	9.11142e+06	2.65422e+06	3.4258e+06	3.05101e+06
0.771_381.324		C23 H43 N O3	381.324	0.771					30.1	level5					2.74449e+07	1.51271e+07	2.32968e+07	2.13954e+07	2.08839e+07	2.28164e+07	1.85707e+07	1.53108e+07	2.20652e+07	1.99349e+07	2.98087e+07	1.15804e+07	5.8576e+07	5.71254e+07	9.55347e+07	6.39866e+07	4.97964e+07	6.04549e+07	2.52464e+07	4.99232e+07	3.49452e+07	6.75493e+07	8.19313e+07	2.72882e+07	6.37364e+07	3.31696e+07
0.771_475.3087	(z)-n-[(4z,7z,10z,13z,16z,19z)-1-hydroxy-4,7,10,13,16,19-docosahexaen-1-ylidene]-l-phenylalanine	C31 H41 N O3	475.309	0.771		S59664371	HMDB0062333			level4	Organic acids and derivatives	Carboxylic acids and derivatives	Amino acids, peptides, and analogues		3.18658e+07	2.7196e+07	2.94938e+07	2.98539e+07	2.85385e+07	2.50117e+07	3.12151e+07	2.3875e+07	3.35664e+07	2.81773e+07	3.04824e+07	2.74346e+07	5.38423e+07	5.34309e+07	8.73867e+07	7.4517e+07	4.02368e+07	5.69693e+07	3.57928e+07	3.83466e+07	4.28206e+07	3.02228e+08	2.64472e+08	4.22084e+07	9.73177e+07	2.85921e+07
0.772_409.2466		C22 H35 N O6	409.247	0.772						level5					742570	414787	728495	360231	879770	648295	587360	501405	637568	419531	865157	544951	790350	724398	1.18384e+06	1.73412e+06	1.13105e+06	577848	748948	1.1937e+06	1.39303e+06	844816	3.80907e+07	723257	1.13084e+06	831891
0.772_477.3244		C25 H44 N5 O2 P	477.324	0.772						level5					1.22176e+06	1.23994e+06	847725	1.04036e+06	1.10844e+06	1.08855e+06	1.17588e+06	858457	1.12281e+06	1.32806e+06	1.0194e+06	713447	1.3141e+06	1.95731e+06	3.43638e+06	2.86515e+06	1.47834e+06	1.61154e+06	1.36505e+06	972095	2.38575e+06	1.25004e+07	5.73839e+06	829401	2.43188e+06	1.46566e+06
0.773_349.2986	N-homo-?-linolenoylethanolamine	C22 H39 N O2	349.299	0.773	C13828	S4445443	HMDB0013625			level4	Organic nitrogen compounds	Organonitrogen compounds	Amines	NULL	5.39463e+06	3.42686e+06	4.43484e+06	4.79941e+06	4.97589e+06	3.37087e+06	4.70589e+06	2.94185e+06	6.02857e+06	5.3132e+06	3.99536e+06	6.00579e+06	1.02471e+07	1.41645e+07	1.26547e+07	9.42775e+06	5.67887e+06	3.73951e+06	4.44695e+06	5.61546e+06	7.93955e+06	1.47939e+07	1.85666e+07	6.52017e+06	5.98814e+06	4.85714e+06
0.773_373.3188		C21 H43 N O4	373.319	0.773						level5					5.09945e+07	4.23169e+07	3.97279e+07	4.2393e+07	4.2617e+07	3.96582e+07	4.66035e+07	4.0269e+07	4.92857e+07	4.04195e+07	4.31897e+07	2.40697e+07	1.20694e+08	1.04291e+08	1.02206e+08	1.06131e+08	8.74749e+07	9.33998e+07	5.41643e+07	8.57473e+07	9.24083e+07	1.93996e+08	2.30061e+08	6.47811e+07	1.45369e+08	5.90003e+07
0.773_431.3408	Peimine	C27 H45 N O3	431.341	0.773	C10830	S116523				level4	Alkaloids	Alkaloids derived by amination reactions	Steroid alkaloids	NULL	8.53681e+06	4.5758e+06	7.76882e+06	5.8031e+06	6.757e+06	8.65578e+06	6.99431e+06	5.69556e+06	7.00754e+06	6.94764e+06	6.64192e+06	5.53475e+06	1.8798e+07	1.27227e+07	1.83006e+07	1.6345e+07	8.30853e+06	1.36058e+07	5.76947e+06	1.15774e+07	1.51359e+07	7.95132e+07	7.40276e+07	1.04364e+07	3.66838e+07	1.00116e+07
0.773_451.3086		C23 H42 N5 O2 P	451.309	0.773						level5					5.22646e+07	4.623e+07	4.74905e+07	5.16192e+07	3.4898e+07	4.67469e+07	3.73892e+07	4.74269e+07	5.83543e+07	3.14442e+07	5.75774e+07	4.71167e+07	9.03537e+07	8.84118e+07	1.33932e+08	1.21305e+08	6.33787e+07	1.04387e+08	6.46924e+07	6.34009e+07	7.2974e+07	4.0107e+08	4.67424e+08	4.75192e+07	1.64311e+08	4.59665e+07
0.773_625.4911		C30 H68 N5 O6 P	625.491	0.773						level5					623798	676241	628948	653136	606147	647459	694138	603860	669053	614468	644974	1.1016e+06	1.4133e+06	1.77109e+06	1.55825e+06	1.48715e+06	1.74519e+06	1.5588e+06	853840	1.5391e+06	1.60615e+06	1.69143e+06	1.61863e+06	2.17182e+06	1.33812e+06	1.53048e+06
0.773_639.4701		C32 H71 N3 O3 P2 S	639.47	0.773						level5					447501	676984	385837	481678	435347	481492	709030	413580	492091	431508	511374	802862	1.04143e+06	1.31499e+06	1.16481e+06	953012	1.3066e+06	971682	633276	1.10819e+06	1.1893e+06	2.09456e+06	1.37089e+06	1.35901e+06	970698	1.14529e+06
0.774_283.0698		C13 H17 N O2 S2	283.07	0.774						level5					5.54485e+06	4.99347e+06	5.36424e+06	5.81983e+06	5.26355e+06	5.99061e+06	5.06177e+06	5.90933e+06	5.45282e+06	5.36466e+06	5.1619e+06	117600	2.33925e+06	175217	2.28022e+07	181918	9.40803e+06	1.35362e+07	2.10014e+07	9.29506e+06	3.24394e+07	206611	178270	7.65513e+06	3.41473e+07	4.22799e+06
0.774_421.2618	(2s,3r,4br,6as,12bs,12cs,14as)-2-(2-hydroxy-2-propanyl)-12b,12c-dimethyl-3,4b,5,6,6a,7,12,12b,12c,13,14,14a-dodecahydro-2h-chromeno[5',6':6,7]indeno[1,2-b]indol-3-ol	C27 H35 N O3	421.262	0.774	C20535	S30790762				level4					480274	419251	403949	839201	444616	429031	502322	688551	287388	557055	542292	3.38398e+06	2.15591e+06	2.92793e+06	6.13427e+06	5.26498e+06	1.04127e+06	944340	446573	751639	804719	5.35038e+06	8.30327e+06	1.89923e+06	774040	947316
0.774_429.3257	Peiminine	C27 H43 N O3	429.326	0.774	C10808	S146697				level4	Alkaloids	Alkaloids derived by amination reactions	Steroid alkaloids	NULL	8.94768e+07	7.10507e+07	8.23764e+07	8.88338e+07	6.45843e+07	8.22856e+07	6.48736e+07	7.33072e+07	9.13959e+07	6.46144e+07	9.51018e+07	6.37875e+07	1.88662e+08	1.8638e+08	2.25392e+08	2.36658e+08	1.31825e+08	1.98358e+08	1.01995e+08	1.31291e+08	1.36472e+08	5.49852e+08	6.95012e+08	7.77733e+07	2.58881e+08	8.44356e+07
0.774_477.327		C30 H44 N3 P	477.327	0.774						level5					449861	867693	651012	755737	544009	748308	658835	770629	448237	818491	596321	907737	2.13129e+06	3.74548e+06	1.95927e+06	3.27673e+06	661020	2.66442e+06	597389	853192	2.19009e+06	8.23232e+06	2.02969e+07	1.27786e+06	3.22411e+06	673562
0.775_367.3084	Prostaglandin f2alpha dimethylamine	C22 H41 N O3	367.308	0.775		S4446227				level4					2.46929e+07	2.08292e+07	2.65818e+07	2.39075e+07	2.58025e+07	2.14823e+07	2.45094e+07	2.06349e+07	2.68254e+07	2.73366e+07	2.17241e+07	2.21578e+07	6.19189e+07	8.32833e+07	8.27535e+07	8.27456e+07	4.95029e+07	5.51559e+07	2.09046e+07	3.83619e+07	3.71949e+07	6.78994e+07	1.03427e+08	2.63305e+07	5.07741e+07	3.51844e+07
0.775_379.3084		C23 H41 N O3	379.308	0.775						level5					1.36526e+07	1.30004e+07	1.36527e+07	1.0554e+07	1.41891e+07	1.12408e+07	1.37638e+07	1.03219e+07	1.51464e+07	1.23858e+07	1.34424e+07	8.47522e+06	1.97634e+07	2.9566e+07	2.2748e+07	2.42129e+07	2.13495e+07	2.8782e+07	1.86173e+07	1.88971e+07	2.00721e+07	1.06354e+08	1.38012e+08	1.65718e+07	4.11371e+07	1.88489e+07
0.776_119.0735		C8 H9 N	119.073	0.776						level5					3.24232e+06	2.73454e+06	2.98855e+06	3.15839e+06	2.66214e+06	3.6088e+06	2.42168e+06	2.80759e+06	3.98012e+06	2.38068e+06	3.17043e+06	1.86486e+06	9.07828e+06	9.05758e+06	7.36008e+06	8.96519e+06	5.32826e+06	6.88779e+06	4.13017e+06	4.84857e+06	9.41269e+06	2.64542e+07	3.94672e+07	3.5954e+06	1.43814e+07	3.32601e+06
0.776_347.2822	Anandamide (aea)	C22 H37 N O2	347.282	0.776	C11695	MReference-821	HMDB0004080		45.3	level3	Organic nitrogen compounds	Organonitrogen compounds	Amines	map04080 Neuroactive ligand-receptor interaction; map04714 Thermogenesis; map04723 Retrograde endocannabinoid signaling; map04750 Inflammatory mediator regulation of TRP channels;	1.80558e+07	1.12509e+07	1.6741e+07	1.93913e+07	1.61403e+07	1.30038e+07	1.27109e+07	1.89694e+07	2.08759e+07	1.13466e+07	1.58464e+07	2.46418e+07	3.44594e+07	5.09371e+07	4.85341e+07	5.75726e+07	1.28551e+07	1.72384e+07	6.19605e+06	1.75214e+07	1.0032e+07	7.11155e+07	1.39109e+08	1.7488e+07	2.92055e+07	2.15794e+07
0.776_481.3984		C29 H57 N P2	481.398	0.776						level5					1.3704e+06	1.3704e+06	1.3704e+06	1.3704e+06	1.3704e+06	1.3704e+06	1.3704e+06	1.3704e+06	1.3704e+06	1.3704e+06	1.3704e+06	3.84488e+06	1.47874e+06	1.96293e+06	2.90752e+06	1.30429e+06	1.03375e+07	977127	6.87871e+06	7.27286e+06	8.48815e+06	1.36733e+06	4.49552e+06	1.57391e+06	2.08037e+06	3.148e+06
0.777_327.3136	Stearoyl ethanolamide	C20 H41 N O2	327.314	0.777		MReference-9794			54.8	level3					3.22015e+06	2.94216e+06	2.0097e+06	3.31519e+06	3.07438e+06	2.97833e+06	2.85607e+06	2.61107e+06	3.21211e+06	2.5986e+06	3.0741e+06	2.29026e+06	1.66308e+07	1.11456e+07	1.06404e+07	6.19669e+06	8.16785e+06	7.16475e+06	3.76456e+06	1.10539e+07	7.3149e+06	1.16314e+07	1.28268e+07	9.73573e+06	2.32259e+07	7.78032e+06
0.777_405.3266		C24 H44 N3 P	405.327	0.777						level5					4.20139e+07	3.68844e+07	3.72963e+07	3.89535e+07	3.7963e+07	3.95018e+07	3.93986e+07	3.30547e+07	4.42926e+07	3.95147e+07	3.76193e+07	2.10722e+07	6.43257e+07	7.73092e+07	7.3632e+07	8.12927e+07	7.13019e+07	7.7734e+07	4.51823e+07	5.95475e+07	8.08494e+07	3.4206e+08	3.39991e+08	4.40749e+07	1.33192e+08	4.59272e+07
0.777_415.3122		C25 H42 N3 P	415.312	0.777						level5					4.81375e+06	5.68612e+06	7.24866e+06	9.63255e+06	4.4284e+06	8.18597e+06	5.90793e+06	6.04508e+06	6.8139e+06	6.33114e+06	5.58328e+06	4.00033e+06	2.60143e+07	1.72675e+07	2.8368e+07	1.11874e+07	1.67455e+07	1.67195e+07	6.1771e+06	9.9948e+06	1.5282e+07	3.16946e+07	1.58992e+07	1.11229e+07	2.46025e+07	6.48688e+06
0.777_427.3109		C26 H42 N3 P	427.311	0.777						level5					2.63896e+06	2.46243e+06	2.78058e+06	1.60612e+06	1.95988e+06	2.36741e+06	2.24988e+06	1.9145e+06	2.48433e+06	2.87091e+06	1.92998e+06	1.87498e+06	6.64909e+06	4.6581e+06	9.43314e+06	8.78195e+06	6.74971e+06	6.21694e+06	3.24186e+06	3.13207e+06	2.73531e+06	1.15137e+07	4.35789e+07	1.64363e+06	6.06898e+06	2.96921e+06
0.777_449.2929	Onapristone	C29 H39 N O3	449.293	0.777		S4470982				level4					2.65044e+06	2.47303e+06	2.79241e+06	1.57575e+06	1.96785e+06	2.37257e+06	2.25486e+06	1.90538e+06	2.47241e+06	2.88157e+06	1.93702e+06	1.88235e+06	6.66918e+06	4.60555e+06	9.23595e+06	9.00355e+06	6.76386e+06	6.23812e+06	3.25325e+06	3.14392e+06	2.74524e+06	1.15422e+07	2.8463e+07	1.64891e+06	6.08848e+06	2.97485e+06
0.778_437.2988		C22 H47 N O3 S2	437.299	0.778						level5					2.90269e+07	2.60408e+07	3.028e+07	2.54788e+07	3.12994e+07	2.89191e+07	2.79588e+07	2.57989e+07	3.48668e+07	2.38626e+07	2.97426e+07	2.83473e+07	6.92038e+07	8.61768e+07	1.55882e+08	1.23544e+08	7.175e+07	8.67156e+07	5.01896e+07	5.35322e+07	7.3738e+07	1.01604e+08	1.52237e+08	3.38272e+07	1.17214e+08	4.07115e+07
0.779_102.0469		C8 H6	102.047	0.779						level5					4.5724e+06	4.46438e+06	4.59482e+06	4.75727e+06	4.4234e+06	4.81122e+06	4.13269e+06	4.57759e+06	5.21848e+06	3.6412e+06	5.1863e+06	4.69026e+06	9.09115e+06	1.21919e+07	1.00639e+07	1.08559e+07	8.42434e+06	9.54421e+06	4.23582e+06	9.19675e+06	8.43227e+06	3.05885e+07	4.15564e+07	6.50039e+06	1.70328e+07	5.80085e+06
0.779_325.2979	Oleoylethanolamide	C20 H39 N O2	325.298	0.779	C20792	S4446574	HMDB0002088			level4	Organic nitrogen compounds	Organonitrogen compounds	Amines	map04024 cAMP signaling pathway;	3.38702e+07	2.39534e+07	4.00429e+07	4.80423e+07	2.87494e+07	4.29267e+07	2.54973e+07	2.83945e+07	4.60438e+07	3.53722e+07	3.15008e+07	5.93611e+07	1.14097e+08	1.31131e+08	7.73254e+07	8.46284e+07	4.54773e+07	5.47174e+07	2.00251e+07	5.28622e+07	7.51017e+07	7.09202e+07	1.30642e+08	7.50298e+07	8.0992e+07	9.02049e+07
0.779_368.2384	[similar to: ginsenoside rd; δmass: -578.3117 da]		368.238	0.779						level5					2.42896e+07	2.20719e+07	2.95356e+07	2.10783e+07	2.7392e+07	2.48583e+07	2.42382e+07	2.39868e+07	2.21106e+07	3.11179e+07	2.22673e+07	3.95596e+07	5.19458e+07	2.11147e+07	1.25065e+08	5.45542e+07	1.45114e+08	4.23309e+07	4.38754e+07	8.78811e+07	1.42702e+08	7.93729e+07	9.94368e+07	5.70517e+07	1.05576e+08	7.84558e+07
0.779_427.3086		C27 H41 N O3	427.309	0.779						level5					4.38424e+07	3.87751e+07	3.94408e+07	3.95238e+07	3.89854e+07	4.07552e+07	4.06126e+07	3.44212e+07	4.62327e+07	4.09723e+07	3.90552e+07	2.22189e+07	6.73502e+07	7.91139e+07	7.76059e+07	8.5957e+07	7.55068e+07	8.33927e+07	4.75017e+07	6.28153e+07	8.35776e+07	3.5844e+08	3.64897e+08	4.46216e+07	1.37276e+08	4.77334e+07
0.779_435.2806		C19 H42 N5 O2 P S	435.281	0.779						level5					4.9418e+07	3.37438e+07	4.49914e+07	4.76463e+07	4.41358e+07	4.73287e+07	5.08412e+07	4.00499e+07	5.08881e+07	3.56153e+07	4.71905e+07	5.99732e+07	1.16946e+08	1.60548e+08	1.77294e+08	1.58215e+08	7.81231e+07	9.95415e+07	6.37148e+07	7.25222e+07	9.39109e+07	1.53826e+08	1.79428e+08	7.54207e+07	1.42995e+08	5.12555e+07
0.78_277.2406		C18 H31 N O	277.241	0.78						level5					1.68958e+07	1.82828e+07	1.65274e+07	1.80662e+07	2.03189e+07	1.64192e+07	1.79173e+07	1.54617e+07	1.98774e+07	1.81569e+07	1.76959e+07	7.04482e+07	4.20371e+07	6.4003e+07	2.39094e+08	3.41358e+07	2.18088e+08	5.45397e+07	3.63646e+07	1.62488e+08	4.99752e+07	1.29929e+08	4.5741e+07	5.71316e+07	4.93944e+07	5.61534e+07
0.78_295.251		C18 H33 N O2	295.251	0.78						level5					1.29706e+08	8.10152e+07	1.63631e+08	1.56451e+08	1.51528e+08	1.47984e+08	8.76642e+07	1.38189e+08	9.81691e+07	1.55257e+08	1.59642e+08	5.16425e+08	4.01341e+08	3.32053e+08	3.95794e+08	1.43308e+08	2.8864e+08	2.53064e+08	1.95768e+08	1.8398e+08	2.01923e+08	1.70127e+08	2.3382e+08	3.29207e+08	2.37278e+08	2.56555e+08
0.78_375.2518		C21 H33 N3 O3	375.252	0.78						level5					1.53008e+06	2.26407e+06	1.59897e+06	905238	2.51435e+06	1.65353e+06	1.63828e+06	1.55442e+06	1.90895e+06	1.87157e+06	1.37185e+06	3.1977e+06	1.45342e+06	2.27017e+06	3.20005e+06	8.62639e+06	2.19535e+06	2.79697e+06	1.74485e+06	1.05315e+06	522489	4.95011e+06	4.41516e+06	1.51028e+07	3.84235e+06	4.40653e+07
0.78_403.3085	N-palmitoylphenylalanine	C25 H41 N O3	403.308	0.78		S14669912				level4					9.44034e+07	5.51559e+07	9.13379e+07	7.91675e+07	8.40755e+07	6.31383e+07	8.37757e+07	7.28939e+07	8.56777e+07	7.29302e+07	8.11683e+07	4.8014e+07	2.30101e+08	2.27904e+08	1.70336e+08	1.90085e+08	1.53824e+08	2.04908e+08	8.76498e+07	1.26362e+08	1.52862e+08	6.60382e+08	6.27776e+08	1.38181e+08	2.02057e+08	9.32738e+07
0.78_459.2809		C21 H42 N5 O2 P S	459.281	0.78						level5					2.41427e+07	2.31205e+07	2.62396e+07	2.20692e+07	2.59877e+07	2.47234e+07	2.4046e+07	2.24304e+07	2.97008e+07	1.92056e+07	2.68169e+07	2.56946e+07	5.61761e+07	7.3766e+07	1.3842e+08	1.04445e+08	6.35472e+07	7.27658e+07	4.66108e+07	4.81581e+07	7.05084e+07	8.47955e+07	1.4025e+08	2.89615e+07	1.11744e+08	3.65049e+07
0.781_413.2971		C22 H44 N3 P S	413.297	0.781						level5					1.04141e+08	6.93708e+07	9.4785e+07	1.02888e+08	9.29091e+07	8.24288e+07	8.73083e+07	8.4799e+07	1.08613e+08	8.31026e+07	9.15561e+07	9.57651e+07	2.65603e+08	3.44716e+08	3.58734e+08	3.01536e+08	1.91017e+08	2.03566e+08	1.1932e+08	1.75329e+08	1.72612e+08	3.04329e+08	3.34408e+08	1.30762e+08	2.37688e+08	1.02703e+08
0.781_437.2965		C25 H43 N O3 S	437.296	0.781						level5					4.52161e+06	2.69338e+06	3.73825e+06	3.17871e+06	5.13975e+06	3.86847e+06	3.49043e+06	3.32537e+06	5.00303e+06	4.31e+06	2.7993e+06	2.33829e+06	1.31398e+07	1.14957e+07	1.65686e+07	1.74456e+07	7.53901e+06	1.3729e+07	4.35627e+06	5.75287e+06	5.06919e+06	1.61802e+07	1.61498e+07	4.65994e+06	8.02624e+06	3.79986e+06
0.781_461.2981		C29 H40 N3 P	461.298	0.781						level5					1.50651e+06	1.83283e+06	1.1118e+06	1.43308e+06	1.78109e+06	1.33336e+06	1.48949e+06	1.2404e+06	1.85833e+06	1.50694e+06	1.42794e+06	276044	2.95682e+06	4.72435e+06	3.05612e+06	3.96761e+06	3.10807e+06	6.25725e+06	1.96637e+06	2.64116e+06	2.62236e+06	8.65959e+06	7.74905e+06	1.40884e+06	5.16645e+06	2.76076e+06
0.782_467.3825		C25 H49 N5 O3	467.382	0.782						level5					2.50099e+06	2.57419e+06	3.28923e+06	2.10356e+06	2.38433e+06	2.85524e+06	2.33938e+06	2.57351e+06	2.33586e+06	2.70993e+06	2.7102e+06	9.44365e+06	1.31154e+07	6.69384e+06	7.44922e+06	1.14878e+07	2.42465e+07	4.46834e+06	5.18123e+06	7.8655e+06	9.10532e+06	8.36423e+06	1.76822e+07	9.38889e+06	4.39007e+06	5.0561e+06
0.783_323.2823	Linoleoyl ethanolamide	C20 H37 N O2	323.282	0.783		MReference-9878	HMDB0012252		90.5	level2	Organic nitrogen compounds	Organonitrogen compounds	Amines		3.38596e+07	3.38596e+07	3.38596e+07	3.38596e+07	3.38596e+07	3.38596e+07	3.38596e+07	3.38596e+07	3.38596e+07	3.38596e+07	3.38596e+07	6.13386e+07	1.30297e+08	1.08703e+08	6.39216e+07	1.03956e+08	4.5266e+07	5.44936e+07	2.9334e+07	3.15728e+07	5.53706e+07	2.45891e+08	3.45951e+08	6.6642e+07	1.20783e+08	5.70137e+07
0.784_399.2773	Epristeride	C25 H37 N O3	399.277	0.784		S61987				level4					9.97693e+06	8.72518e+06	1.03025e+07	8.37151e+06	6.24617e+06	9.59457e+06	7.00317e+06	8.99077e+06	8.7937e+06	9.62751e+06	8.26953e+06	1.34823e+07	1.6332e+07	3.60456e+07	3.39844e+07	3.00358e+07	2.20652e+07	3.2992e+07	1.08753e+07	1.46549e+07	2.16958e+07	3.78107e+07	2.37123e+07	1.52124e+07	2.86111e+07	1.47386e+07
0.784_399.2982		C22 H41 N O5	399.298	0.784						level5					1.54231e+07	1.74212e+07	1.77021e+07	1.29916e+07	1.1376e+07	1.57203e+07	1.27121e+07	1.48226e+07	1.79773e+07	1.22243e+07	1.62713e+07	1.95656e+07	4.07628e+07	3.81568e+07	4.24186e+07	5.70011e+07	3.12372e+07	4.31112e+07	1.71916e+07	2.47075e+07	3.24168e+07	2.76511e+07	4.26615e+07	1.53071e+07	3.24143e+07	1.92446e+07
0.784_425.293	Jervine	C27 H39 N O3	425.293	0.784	C10811	S9694				level4	Alkaloids	Alkaloids derived by amination reactions	Steroid alkaloids		2.24551e+06	3.26619e+06	2.39144e+06	1.63342e+06	2.03724e+06	2.69063e+06	2.25014e+06	2.34546e+06	2.76784e+06	2.44429e+06	1.80389e+06	1.13159e+06	4.90464e+06	2.99135e+06	2.36747e+06	5.69904e+06	6.92226e+06	4.82765e+06	5.23365e+06	5.19001e+06	7.08082e+06	2.8686e+07	1.07264e+07	3.45972e+06	1.21177e+07	2.48104e+06
0.785_269.2719	Capsi-amide	C17 H35 N O	269.272	0.785	C17515	S43094	HMDB0040940			level4	Organic acids and derivatives	Carboxylic acids and derivatives	Carboxylic acid derivatives	NULL	5.10513e+06	3.9261e+06	4.1563e+06	5.17329e+06	5.19499e+06	4.68886e+06	5.05201e+06	4.84936e+06	4.73388e+06	3.70109e+06	5.41827e+06	7.17101e+06	3.23184e+07	5.46591e+07	1.7029e+07	1.72574e+07	2.78493e+07	3.46429e+07	4.50009e+06	3.22222e+07	4.4222e+07	2.31891e+07	1.57824e+07	1.87938e+07	3.23439e+07	3.87835e+07
0.786_411.2808		C17 H42 N5 O2 P S	411.281	0.786						level5					5.33858e+07	4.46446e+07	6.06139e+07	3.41716e+07	4.36561e+07	4.98768e+07	3.83196e+07	4.50785e+07	5.77638e+07	4.11757e+07	4.82825e+07	4.71173e+07	9.39346e+07	1.30663e+08	1.00469e+08	1.4796e+08	1.13211e+08	1.21669e+08	7.29303e+07	7.0611e+07	1.1404e+08	1.97076e+08	2.58846e+08	6.07808e+07	1.49569e+08	7.54282e+07
0.786_433.2649		C19 H42 N5 P3	433.265	0.786						level5					1.15093e+06	1.1023e+06	1.06068e+06	1.14141e+06	1.125e+06	1.1218e+06	1.11216e+06	1.1138e+06	1.22838e+06	928802	1.22177e+06	877791	2.77734e+06	1.47966e+06	1.31992e+07	6.33455e+06	1.14172e+06	3.86809e+06	1.65991e+06	1.9322e+06	1.38134e+06	1.31754e+06	6.46748e+06	529140	1.86093e+06	2.10444e+06
0.787_299.2823	D-sphingosine	C18 H37 N O2	299.282	0.787	C00319	MReference-418	HMDB0000252		69	level2	Organic nitrogen compounds	Organonitrogen compounds	Amines	map00600 Sphingolipid metabolism; map01100 Metabolic pathways; map04071 Sphingolipid signaling pathway; map04210 Apoptosis; map04217 Necroptosis;	3.19148e+07	2.59673e+07	2.96132e+07	2.54169e+07	2.93623e+07	2.0273e+07	3.02022e+07	2.55502e+07	3.10066e+07	2.61945e+07	2.86729e+07	2.25637e+07	8.21537e+07	1.24604e+08	1.12728e+08	1.03118e+08	5.53235e+07	5.25962e+07	1.34789e+07	4.4054e+07	3.9902e+07	1.51097e+08	1.78093e+08	6.9402e+07	9.86227e+07	7.20495e+07
0.787_311.246		C18 H33 N O3	311.246	0.787						level5					1.88706e+07	1.99656e+07	1.61839e+07	2.68619e+07	1.49991e+07	1.77782e+07	2.02778e+07	1.82897e+07	2.13592e+07	1.59364e+07	2.02163e+07	3.4978e+07	4.37635e+07	7.83814e+07	4.03552e+07	5.48803e+07	3.89341e+07	6.61098e+07	2.10917e+07	2.51817e+07	3.59808e+07	5.01867e+07	5.57279e+07	5.92524e+07	1.99117e+07	8.35921e+07
0.787_353.2929		C21 H39 N O3	353.293	0.787					51.9	level5					3.6319e+07	3.11905e+07	3.77101e+07	3.51074e+07	3.37377e+07	3.23315e+07	3.09589e+07	3.50627e+07	4.2316e+07	3.22587e+07	3.17506e+07	2.87863e+07	7.17978e+07	1.28148e+08	1.28851e+08	1.14104e+08	8.65188e+07	9.63624e+07	3.11438e+07	6.6484e+07	5.58133e+07	3.95604e+07	7.8315e+07	4.1465e+07	7.35745e+07	5.97785e+07
0.787_357.2877		C20 H39 N O4	357.288	0.787						level5					411307	367725	412253	491687	390330	416742	424983	394711	424863	390645	431210	735309	737174	942257	838339	822877	1.06311e+06	835358	557217	984413	985550	1.12917e+06	2.52467e+06	1.76936e+06	849890	734322
0.787_387.2806		C21 H41 N O3 S	387.281	0.787						level5					7.21603e+07	6.17898e+07	6.97191e+07	5.15614e+07	5.92023e+07	6.80351e+07	6.93812e+07	5.60971e+07	7.17675e+07	5.81492e+07	6.44351e+07	5.32828e+07	2.01597e+08	1.98393e+08	1.43964e+08	2.30644e+08	1.44765e+08	2.03202e+08	8.63121e+07	1.28984e+08	1.43358e+08	2.88078e+08	2.12591e+08	1.33167e+08	2.2595e+08	1.09427e+08
0.788_269.2354		C16 H31 N O2	269.235	0.788						level5					4.94675e+06	4.29706e+06	4.13368e+06	5.74157e+06	4.87457e+06	5.97132e+06	4.71885e+06	6.7661e+06	3.54612e+06	3.22078e+06	7.10133e+06	1.65904e+07	1.1019e+07	1.76819e+07	5.95643e+06	1.04857e+07	8.59414e+06	1.12854e+07	7.34163e+06	9.50218e+06	1.268e+07	6.65064e+06	6.66103e+06	1.08841e+07	7.07053e+06	1.32649e+07
0.788_305.2356	Samandarin	C19 H31 N O2	305.236	0.788	C19950	S16736008				level4	Venoms	Others	Salamandra venoms	NULL	1.30495e+06	1.19289e+06	831002	760196	987963	1.27002e+06	741335	1.21752e+06	1.27804e+06	628375	1.24962e+06	3.32554e+06	1.43184e+06	1.61216e+06	1.70785e+06	1.59053e+06	1.84901e+06	1.61676e+06	3.28648e+06	2.42784e+06	1.28795e+06	1.29215e+06	1.46688e+06	3.7533e+06	2.11768e+06	872879
0.788_326.2242	Promegestone	C22 H30 O2	326.224	0.788	C14208	S33716				level4				NULL	4.28816e+06	2.96084e+06	4.09821e+06	3.13249e+06	3.54375e+06	3.57699e+06	2.97298e+06	4.40206e+06	5.17005e+06	2.75414e+06	2.97828e+06	6.30028e+06	3.43722e+06	6.08466e+06	4.54215e+06	4.75683e+06	3.41407e+06	1.05318e+07	3.98439e+06	3.17577e+06	5.87208e+06	1.14661e+07	3.83268e+06	1.33038e+07	6.31904e+06	1.01073e+07
0.788_428.2197	4a-hydroxy-12-methoxy-4,4,6a,8,13b-pentamethyl-1,4,4a,5,6,6a,9,13,13a,13b-decahydro-2h-benzo[a]furo[3,4-i]xanthene-3,11-dione	C25 H32 O6	428.22	0.788		S35013150	HMDB0030158			level4	Phenylpropanoids and polyketides	Flavonoids	Flavones		3.05612e+06	3.14444e+06	2.54766e+06	3.81165e+06	2.9019e+06	3.65203e+06	2.23326e+06	3.63009e+06	3.75696e+06	2.79055e+06	2.76151e+06	4.87788e+06	3.14552e+06	6.90335e+06	4.31991e+06	4.28137e+06	5.67194e+06	3.811e+06	3.80058e+06	4.99045e+06	4.16993e+06	3.6299e+06	2.82523e+06	3.81582e+06	4.49594e+06	4.07606e+06
0.788_525.4244		C28 H55 N5 O4	525.424	0.788						level5					1.36814e+06	1.36814e+06	1.36814e+06	1.36814e+06	1.36814e+06	1.36814e+06	1.36814e+06	1.36814e+06	1.36814e+06	1.36814e+06	1.36814e+06	3.47526e+06	2.30072e+06	3.95484e+06	2.56024e+06	2.97399e+06	6.36892e+06	1.35337e+06	6.96164e+06	7.72691e+06	1.42548e+07	1.87524e+06	3.85222e+06	3.50699e+06	1.98046e+06	1.88125e+06
0.789_375.2774		C17 H38 N5 O2 P	375.277	0.789						level5					2.04615e+07	1.84303e+07	2.32412e+07	1.93923e+07	1.85282e+07	2.02075e+07	1.96115e+07	2.06838e+07	2.17247e+07	1.88541e+07	1.91713e+07	3.03202e+07	4.58813e+07	8.37171e+07	7.20152e+07	6.25615e+07	3.2349e+07	5.6298e+07	2.37587e+07	3.25014e+07	3.77509e+07	6.27205e+07	7.05763e+07	4.14802e+07	4.95965e+07	2.99571e+07
0.789_387.2827		C18 H37 N5 O4	387.283	0.789						level5					2.15329e+06	2.68119e+06	1.78199e+06	1.6916e+06	1.50448e+06	2.16498e+06	1.90387e+06	2.10739e+06	1.85275e+06	2.26056e+06	1.70857e+06	1.42752e+06	5.38877e+06	3.53994e+06	2.9648e+06	3.78877e+06	7.98609e+06	7.03724e+06	3.7386e+06	6.68069e+06	4.93274e+06	7.66296e+06	1.1991e+07	3.37324e+06	1.24671e+07	4.17941e+06
0.789_391.3084	(5z,8z,11z,14z)-n,n-bis(2-hydroxyethyl)-5,8,11,14-icosatetraenamide	C24 H41 N O3	391.308	0.789		S4446534				level4					2.96818e+06	2.47865e+06	2.79375e+06	3.26237e+06	2.61948e+06	2.82716e+06	2.71662e+06	3.01329e+06	2.81529e+06	2.75442e+06	2.74265e+06	2.19258e+06	2.85524e+06	4.19035e+06	4.7166e+06	4.89022e+06	5.37001e+06	3.24954e+06	1.91502e+06	2.27185e+06	4.38232e+06	1.39554e+07	1.60443e+07	3.55161e+06	5.60351e+06	4.17969e+06
0.789_409.265		C23 H39 N O3 S	409.265	0.789						level5					2.80009e+06	1.78481e+06	2.21595e+06	1.96846e+06	1.66441e+06	2.0053e+06	1.93475e+06	2.16136e+06	2.37985e+06	1.57372e+06	2.34776e+06	1.34835e+06	4.90979e+06	3.53331e+06	2.88373e+06	3.6469e+06	8.13701e+06	6.19458e+06	3.90719e+06	6.63629e+06	5.11528e+06	6.89775e+06	3.6411e+06	3.439e+06	1.31203e+07	4.15079e+06
0.79_293.2354		C18 H31 N O2	293.235	0.79						level5					1.21702e+07	1.16751e+07	8.15523e+06	1.46874e+07	1.15975e+07	1.13195e+07	1.04153e+07	1.20131e+07	1.25932e+07	9.97686e+06	1.18154e+07	2.33073e+07	2.45438e+07	2.27671e+07	1.85122e+07	1.84885e+07	2.43517e+07	2.23599e+07	1.36215e+07	1.51689e+07	1.98713e+07	1.66569e+07	4.0219e+07	3.60863e+07	1.86853e+07	3.29851e+07
0.79_366.2771		C16 H39 N4 O3 P	366.277	0.79						level5					5.17646e+06	5.20168e+06	5.25077e+06	4.88401e+06	5.35472e+06	5.03332e+06	5.24637e+06	5.00624e+06	4.87963e+06	5.29395e+06	5.41625e+06	1.08448e+07	1.17939e+07	1.36808e+07	1.48497e+07	1.04061e+07	7.62864e+06	1.29264e+07	3.21506e+06	5.82693e+06	3.38593e+06	1.52507e+07	1.17533e+07	6.26945e+06	1.27289e+07	8.24854e+06
0.792_255.22		C15 H29 N O2	255.22	0.792						level5					1.61113e+06	2.5437e+06	1.20759e+06	3.65822e+06	2.26078e+06	2.07455e+06	2.05389e+06	2.56564e+06	1.62092e+06	2.04283e+06	2.24282e+06	6.95602e+06	3.82966e+06	3.04048e+06	1.25984e+06	1.73256e+06	1.99247e+06	1.95987e+06	1.87292e+06	2.98845e+06	3.95971e+06	2.03056e+06	1.48225e+06	2.95825e+06	1.54324e+06	1.70369e+06
0.792_425.3288		C22 H44 N5 O P	425.329	0.792						level5					1.00471e+06	914734	1.05261e+06	1.0508e+06	1.00218e+06	799790	1.05048e+06	764722	1.41923e+06	792024	1.07138e+06	3.32179e+06	4.00991e+06	6.16522e+06	6.82676e+06	4.86027e+06	1.48045e+06	1.18937e+06	588454	432022	1.37874e+06	6.21462e+06	9.31623e+06	3.78516e+06	2.30929e+06	8.28391e+06
0.794_279.1257	Aporeine	C18 H17 N O2	279.126	0.794		S205203	HMDB0030264			level4	Organoheterocyclic compounds	Heteroaromatic compounds	null		4.67609e+07	4.65327e+07	4.71051e+07	4.25728e+07	4.90769e+07	4.63505e+07	4.63356e+07	4.59653e+07	4.77363e+07	4.55124e+07	4.62394e+07	7.16645e+07	3.82813e+07	7.49542e+07	1.12033e+08	7.39877e+07	1.62613e+08	4.9424e+07	8.24554e+07	1.11287e+08	1.07613e+08	5.68053e+07	5.81208e+07	5.80264e+07	1.89898e+08	1.112e+08
0.794_311.3186		C20 H41 N O	311.319	0.794						level5					3.44635e+06	3.5413e+06	3.83189e+06	5.12082e+06	3.95899e+06	3.83484e+06	4.12697e+06	2.90474e+06	4.63133e+06	4.64417e+06	3.49962e+06	806454	1.87835e+07	3.09099e+07	3.12853e+07	1.66631e+07	2.69943e+07	1.42753e+07	1.2776e+06	3.08378e+07	2.1847e+07	1.16196e+07	8.91212e+06	2.07323e+06	2.77737e+07	1.81693e+07
0.795_118.0782	Indane	C9 H10	118.078	0.795		S9903	HMDB0059837			level4	Benzenoids	Indanes	null		1.48757e+08	1.51051e+08	1.55308e+08	1.69414e+08	1.46672e+08	1.75869e+08	1.69025e+08	9.56188e+07	1.84632e+08	1.67706e+08	1.71811e+08	3.65564e+08	1.34755e+08	3.92911e+08	4.44335e+08	3.59925e+08	3.99942e+08	2.97422e+08	3.1475e+08	4.16102e+08	4.65052e+08	2.14393e+08	2.54171e+08	2.55935e+08	2.35773e+08	2.39543e+08
0.795_134.0731	4-ethylbenzaldehyde	C9 H10 O	134.073	0.795		MReference-6570	HMDB0032024		84.5	level2	Benzenoids	Benzene and substituted derivatives	Benzoyl derivatives		3.359e+07	5.06941e+07	2.73254e+07	5.25682e+07	4.82195e+07	4.53968e+07	4.37078e+07	2.85413e+07	5.42803e+07	5.61005e+07	3.03559e+07	1.12114e+08	6.35532e+07	1.01346e+08	6.56051e+07	1.02531e+08	7.45447e+07	9.29491e+07	8.09644e+07	1.06998e+08	8.25781e+07	8.36712e+07	3.64453e+07	7.89477e+07	1.14623e+08	8.70181e+07
0.795_280.1311	Hydroxystilbamidine	C16 H16 N4 O	280.131	0.795		S10612853	HMDB0240284			level4	Phenylpropanoids and polyketides	Stilbenes	null		7.02217e+07	5.59735e+07	6.62784e+07	7.91563e+07	5.87519e+07	6.47823e+07	6.40182e+07	6.79757e+07	8.97861e+07	4.78011e+07	6.51843e+07	1.7478e+08	6.2717e+07	1.06366e+08	1.62664e+08	1.53943e+08	1.67308e+08	9.70241e+07	1.20634e+08	1.26353e+08	1.13791e+08	9.10158e+07	4.95373e+07	8.55917e+07	8.62652e+07	1.37709e+08
0.795_281.1341		C9 H23 N5 O S2	281.134	0.795						level5					1.04047e+07	8.33174e+06	8.9657e+06	8.71219e+06	7.41928e+06	9.43736e+06	8.78803e+06	8.53304e+06	8.86696e+06	1.01133e+07	7.86286e+06	1.48251e+07	1.09568e+07	2.02982e+07	1.13131e+07	1.35423e+07	1.77219e+07	1.67098e+07	1.4503e+07	2.03175e+07	1.5833e+07	2.31235e+07	8.05427e+06	2.12405e+07	1.07201e+07	1.32532e+07
0.795_294.1103	Tutin	C15 H18 O6	294.11	0.795	C09570	S10252021				level4	Terpenoids	Sesquiterpenoids (C15)	Tutinolide	NULL	1.84619e+07	2.07866e+07	2.24958e+07	2.59393e+07	1.34507e+07	2.0354e+07	2.06552e+07	2.03588e+07	2.62823e+07	1.74705e+07	1.69322e+07	4.40308e+07	2.26702e+07	3.8393e+07	5.37866e+07	3.79856e+07	4.41334e+07	3.73559e+07	4.49484e+07	5.40913e+07	3.71991e+07	3.12147e+07	2.7542e+07	2.97914e+07	5.30611e+07	2.81705e+07
0.795_445.2458		C17 H41 N3 O6 P2	445.246	0.795						level5					2.32665e+06	2.32665e+06	2.32665e+06	2.32665e+06	2.32665e+06	2.32665e+06	2.32665e+06	2.32665e+06	2.32665e+06	2.32665e+06	2.32665e+06	2.48815e+06	1.94196e+06	4.17203e+06	3.43128e+06	2.15312e+06	2.3321e+06	4.39418e+06	2.21535e+06	3.8348e+06	1.68395e+06	2.46154e+06	1.74982e+06	2.06491e+06	2.65903e+06	2.05278e+06
0.795_457.2463		C18 H39 N3 O8 S	457.246	0.795						level5					5.0569e+06	6.15722e+06	6.41101e+06	6.07973e+06	5.01076e+06	5.88003e+06	5.08533e+06	7.75331e+06	5.00146e+06	6.73583e+06	4.53852e+06	9.82542e+06	5.86008e+06	9.52489e+06	8.9134e+06	1.07581e+07	9.76984e+06	1.20233e+07	1.02866e+07	1.47308e+07	2.04466e+07	7.69611e+06	6.6166e+06	8.46754e+06	1.18145e+07	5.31161e+06
0.795_487.2934		C20 H47 N3 O6 P2	487.293	0.795						level5					2.97469e+06	2.46984e+06	1.71576e+06	1.70136e+06	1.74387e+06	3.05575e+06	2.54153e+06	1.7803e+06	2.10314e+06	2.99089e+06	1.69911e+06	2.85295e+06	2.01998e+06	2.78735e+06	2.25088e+06	3.03278e+06	4.01247e+06	3.0095e+06	1.79936e+06	3.53532e+06	2.49156e+06	2.24249e+06	1.3209e+06	1.80201e+06	3.70147e+06	1.81056e+06
0.795_845.4332		C49 H59 N5 O8	845.433	0.795						level5					3.95494e+07	2.89263e+07	2.94083e+07	3.06349e+07	3.87995e+07	3.65758e+07	3.47419e+07	3.30188e+07	3.51487e+07	3.01037e+07	3.45391e+07	1.05762e+08	4.41995e+07	1.12658e+08	1.05472e+08	9.5964e+07	1.59534e+08	5.66599e+07	9.11755e+07	1.65656e+08	1.51793e+08	8.37667e+07	3.45199e+07	7.16667e+07	9.681e+07	8.26915e+07
0.796_352.2803			352.28	0.796						level5					4.06711e+06	3.96958e+06	4.39819e+06	4.69373e+06	4.3029e+06	4.53348e+06	3.85699e+06	3.33207e+06	6.48831e+06	3.44819e+06	4.48968e+06	5.0992e+06	7.93017e+06	9.69019e+06	7.79591e+06	7.53264e+06	1.05443e+07	9.98292e+06	4.75439e+06	9.17003e+06	7.88875e+06	1.28933e+07	1.84444e+07	1.01907e+07	1.12894e+07	6.87845e+06
0.796_389.2936	4-{(z)-[(5e,8z,11z,14z)-1-hydroxy-5,8,11,14-icosatetraen-1-ylidene]amino}butanoic acid	C24 H39 N O3	389.294	0.796		S59693703				level4					2.9344e+06	3.30149e+06	3.87787e+06	4.106e+06	3.12416e+06	3.25038e+06	3.49136e+06	3.88604e+06	3.1561e+06	2.59737e+06	4.30152e+06	3.93399e+06	2.69129e+06	1.45984e+07	1.40621e+07	3.22189e+06	3.48744e+06	5.15464e+06	2.21393e+06	1.95638e+06	4.25202e+06	1.58244e+07	4.44215e+07	5.24253e+06	1.0781e+07	5.3873e+06
0.796_472.2576		C24 H41 O7 P	472.258	0.796						level5					2.73136e+06	2.86836e+06	3.03671e+06	3.07188e+06	2.65907e+06	2.86338e+06	2.8795e+06	2.94719e+06	2.5019e+06	3.1479e+06	2.90596e+06	7.22821e+06	2.74026e+06	3.16173e+06	1.61101e+06	2.52865e+06	4.00247e+06	4.66197e+06	2.88686e+06	8.74204e+06	9.04281e+06	3.18632e+06	3.671e+06	2.66572e+06	5.70427e+06	2.77437e+06
0.796_531.378		C29 H57 N O3 S2	531.378	0.796						level5					609990	559270	683999	633238	743685	651708	664803	487909	872132	562438	663190	789610	2.42217e+06	959532	1.41365e+06	853239	4.70483e+06	806099	9.9354e+06	7.27513e+06	1.37541e+07	1.27527e+06	1.32158e+06	1.22384e+06	1.58255e+06	424091
0.796_695.4754		C42 H65 N O7	695.475	0.796						level5					6.62965e+06	7.59817e+06	7.88678e+06	7.04535e+06	8.11317e+06	7.51e+06	7.05138e+06	6.43233e+06	8.63046e+06	8.62036e+06	6.31823e+06	9.00861e+06	2.22889e+07	4.00641e+07	5.12847e+07	4.3086e+07	5.07874e+07	2.86882e+07	2.65578e+07	3.65851e+07	4.45571e+07	2.66821e+07	1.68547e+07	3.02989e+07	3.34315e+07	3.22001e+07
0.797_292.2038	12-oxo phytodienoic acid	C18 H28 O3	292.204	0.797	C01226	S4444088			32.1	level4	FA Fatty acyls	FA02 Octadecanoids	FA0201 12-oxophytodienoic acid metabolites	map00592 alpha-Linolenic acid metabolism; map01100 Metabolic pathways;	2.15483e+07	1.31254e+07	1.99714e+07	1.74693e+07	1.38725e+07	1.72817e+07	1.37242e+07	1.64938e+07	2.19821e+07	1.59569e+07	1.56686e+07	3.12514e+07	3.069e+07	4.23244e+07	4.97668e+07	3.32929e+07	3.40482e+07	1.72601e+07	1.95404e+07	2.9826e+07	2.67324e+07	3.92966e+07	1.15178e+08	6.49228e+07	3.71656e+07	5.1111e+07
0.797_351.2773		C21 H37 N O3	351.277	0.797						level5					2.66111e+07	2.50777e+07	2.10668e+07	2.66437e+07	2.47647e+07	2.56145e+07	2.49758e+07	2.4295e+07	2.92527e+07	2.24463e+07	2.381e+07	3.23735e+07	4.32017e+07	6.88685e+07	4.87187e+07	4.12532e+07	5.94289e+07	6.69815e+07	3.22323e+07	5.57681e+07	6.29025e+07	7.72037e+07	1.04111e+08	4.92218e+07	7.30584e+07	4.23092e+07
0.797_511.4095		C27 H53 N5 O4	511.409	0.797						level5					2.70619e+06	2.34604e+06	2.05036e+06	2.31066e+06	2.64218e+06	2.63109e+06	2.51268e+06	2.42226e+06	2.37692e+06	2.27618e+06	2.53284e+06	5.45083e+06	9.51234e+06	8.33878e+06	8.06772e+06	1.1215e+07	2.15534e+07	6.07454e+06	7.83704e+06	1.08143e+07	1.35776e+07	1.02241e+07	1.74716e+07	8.86345e+06	4.78251e+06	5.16807e+06
0.797_751.5373		C39 H78 N O10 P	751.537	0.797						level5					587581	443017	567067	625098	886839	376851	586728	568546	356496	668342	834740	661777	2.61351e+06	2.37862e+06	2.09652e+06	1.38834e+06	1.94361e+06	1.88999e+06	304715	2.03571e+06	2.88152e+06	1.61609e+06	1.00974e+06	632725	1.07721e+06	1.35583e+06
0.798_132.0573	Cinnamaldehyde	C9 H8 O	132.057	0.798	C00903	S553117	HMDB0003441			level4	Phenylpropanoids and polyketides	Cinnamaldehydes	null	map01100 Metabolic pathways; map04750 Inflammatory mediator regulation of TRP channels;	7.24609e+06	4.03687e+06	6.27517e+06	7.7794e+06	5.61024e+06	4.86247e+06	9.05947e+06	8.16517e+06	7.78883e+06	4.80255e+06	4.00349e+06	1.6062e+07	1.27798e+07	1.25887e+07	1.21286e+07	9.98631e+06	1.67053e+07	1.49629e+07	7.77799e+06	7.58581e+06	1.7198e+07	1.04961e+07	7.98959e+06	1.55396e+07	1.04992e+07	1.02618e+07
0.798_327.2772	N-heptadecanoylglycine	C19 H37 N O3	327.277	0.798		S16409604	HMDB0013246			level4	Organic acids and derivatives	Carboxylic acids and derivatives	Amino acids, peptides, and analogues		3.50983e+07	2.70941e+07	3.37954e+07	3.80063e+07	3.31117e+07	3.70284e+07	3.32762e+07	3.26376e+07	3.79182e+07	2.84554e+07	3.48209e+07	3.40651e+07	6.74433e+07	1.10501e+08	1.2778e+08	9.09253e+07	7.59321e+07	9.68788e+07	4.75617e+07	7.04523e+07	7.35937e+07	9.29213e+07	1.0596e+08	9.6275e+07	9.85737e+07	5.9971e+07
0.799_253.2042	[similar to: palmitoleic acid; δmass: -1.0203 da]		253.204	0.799						level5					2.85364e+06	3.35676e+06	3.03651e+06	3.65778e+06	3.18045e+06	3.16985e+06	3.27693e+06	2.80237e+06	3.47092e+06	3.10127e+06	3.33647e+06	7.95355e+06	8.08741e+06	1.34431e+07	4.59537e+06	2.99451e+06	8.02495e+06	5.57014e+06	4.01028e+06	8.21568e+06	5.29344e+06	2.96135e+06	3.32519e+06	3.69991e+06	6.09689e+06	3.95645e+06
0.799_279.1283		C15 H21 N O2 S	279.128	0.799						level5					4.26266e+07	5.86913e+07	4.67956e+07	4.31801e+07	5.43846e+07	5.38991e+07	3.88882e+07	5.09842e+07	5.31753e+07	5.23485e+07	4.38572e+07	1.02615e+08	7.13297e+07	9.28605e+07	1.04504e+08	1.01683e+08	1.40965e+08	9.76768e+07	8.52594e+07	1.52028e+08	1.08446e+08	1.03514e+08	4.32299e+07	1.01008e+08	8.83408e+07	1.09492e+08
0.799_279.1323	(2s)-3-methyl-2-({[(3s,4s,5r)-2,3,4-trihydroxy-5-(hydroxymethyl)tetrahydro-2-furanyl]methyl}amino)butanoic acid (non-preferred name)	C11 H21 N O7	279.132	0.799		S35014481	HMDB0037844			level4	Organic acids and derivatives	Carboxylic acids and derivatives	Amino acids, peptides, and analogues		6.26858e+07	3.69275e+07	4.55089e+07	5.52791e+07	5.34992e+07	5.27129e+07	4.0771e+07	4.13131e+07	6.19849e+07	4.99659e+07	5.08519e+07	1.14929e+08	6.31246e+07	1.18655e+08	9.25974e+07	1.00357e+08	2.0614e+08	9.06957e+07	9.06234e+07	1.73336e+08	1.23868e+08	1.09761e+08	5.29366e+07	9.9232e+07	9.81999e+07	1.50537e+08
0.799_385.265		C21 H39 N O3 S	385.265	0.799					47.1	level5					1.02495e+07	7.03142e+06	1.17209e+07	8.50492e+06	7.74712e+06	3.72309e+06	1.14258e+07	6.54291e+06	9.7514e+06	8.31281e+06	9.09108e+06	7.74322e+06	2.78568e+07	3.54107e+07	5.05757e+07	3.01387e+07	2.74406e+07	2.08787e+07	1.37554e+07	2.69622e+07	2.02421e+07	1.01356e+07	1.08894e+07	1.22505e+07	1.26434e+07	3.3431e+07
0.799_475.2567		C26 H37 N O7	475.257	0.799						level5					4.36083e+06	7.73133e+06	5.8738e+06	6.68462e+06	5.13101e+06	5.88608e+06	6.00818e+06	7.92164e+06	5.66865e+06	5.11972e+06	5.2964e+06	8.96605e+06	7.50671e+06	1.06236e+07	1.02429e+07	1.24385e+07	1.10978e+07	1.4456e+07	1.20504e+07	1.40954e+07	2.20141e+07	7.81743e+06	7.44653e+06	1.05507e+07	1.1419e+07	7.46435e+06
0.8_359.2496		C19 H37 N O3 S	359.25	0.8						level5					783245	826777	946851	764439	801490	646571	832041	704923	1.1141e+06	681368	807653	499359	2.32938e+06	2.73146e+06	2.01283e+06	3.48907e+06	2.95524e+06	2.18265e+06	1.27478e+06	1.71351e+06	1.44127e+06	1.12697e+06	657634	751946	1.44545e+06	1.70891e+06
0.8_417.2361		C21 H31 N5 O4	417.236	0.8						level5					4.93892e+06	4.91695e+06	2.97279e+06	3.2906e+06	3.95571e+06	3.68843e+06	6.1213e+06	3.68999e+06	3.54127e+06	4.01957e+06	3.99574e+06	9.20826e+06	1.95148e+07	5.08148e+06	1.20978e+07	1.46452e+07	3.5264e+06	1.45017e+07	1.26362e+06	1.37714e+06	1.52271e+06	2.11902e+07	5.78642e+07	5.19747e+06	5.02613e+06	6.92427e+06
0.802_353.2565		C20 H35 N O4	353.257	0.802					45	level5					5.47047e+06	3.98569e+06	6.46949e+06	8.08943e+06	4.41094e+06	5.78305e+06	3.57686e+06	6.48218e+06	4.57059e+06	5.44615e+06	6.57193e+06	1.96918e+07	5.39268e+06	6.34086e+06	5.91072e+06	4.8805e+06	5.71313e+06	1.05434e+07	3.69454e+06	2.71259e+06	4.84695e+06	1.85001e+07	3.1179e+07	4.01141e+07	6.9076e+06	1.81842e+07
0.802_503.2519		C20 H42 N O11 P	503.252	0.802						level5					1.34864e+06	1.45631e+06	1.42222e+06	1.32485e+06	1.43188e+06	1.38836e+06	1.40479e+06	1.40002e+06	1.24229e+06	1.61891e+06	1.33859e+06	3.90163e+06	1.12122e+06	1.54549e+06	3.37367e+06	873928	4.0876e+06	2.26378e+06	3.31868e+06	4.19888e+06	6.59023e+06	638375	2.47869e+06	1.33931e+06	2.95026e+06	2.42699e+06
0.802_618.6052	Oleoyl ethylamide	C20 H39 N O	618.605	0.802		MReference-4424			35.2	level3					4.4318e+07	3.76325e+07	3.11543e+07	3.49943e+07	4.19497e+07	3.30915e+07	4.4711e+07	3.03278e+07	3.42577e+07	3.69506e+07	4.6529e+07	4.68511e+07	2.68614e+07	1.41725e+08	9.70881e+07	6.4946e+07	6.4136e+07	8.87682e+07	2.68861e+07	4.33436e+07	8.33132e+07	6.72093e+07	5.70657e+07	8.90001e+07	5.41585e+07	7.34033e+07
0.803_569.4501		C33 H65 N O2 P2	569.45	0.803						level5					1.04471e+06	1.30245e+06	1.13647e+06	1.28885e+06	1.09309e+06	967235	1.17021e+06	1.34987e+06	1.00836e+06	1.11632e+06	1.2076e+06	2.79573e+06	2.81971e+06	4.26017e+06	2.60085e+06	2.45415e+06	6.00088e+06	1.60028e+06	6.82469e+06	6.01503e+06	8.44014e+06	4.09794e+06	3.83969e+06	3.0575e+06	2.97275e+06	2.08952e+06
0.803_817.4031		C46 H59 N O12	817.403	0.803						level5					2.07336e+07	1.78247e+07	1.98454e+07	2.08245e+07	1.78036e+07	2.07832e+07	1.95524e+07	2.0008e+07	2.11805e+07	1.76335e+07	1.93012e+07	9.30096e+07	2.09641e+07	5.74812e+07	6.13858e+07	8.46518e+07	7.53766e+07	4.12465e+07	5.54698e+07	6.96958e+07	7.03264e+07	5.12426e+07	1.85252e+07	2.92748e+07	2.67881e+07	2.91888e+07
0.804_230.1057	1-methyl-1,2,3,4-tetrahydro-î²-carboline-3-carboxylic acid	C13 H14 N2 O2	230.106	0.804		S66213	HMDB0037942			level4	Alkaloids and derivatives	Harmala alkaloids	null		265419	236851	265008	265179	249826	259174	262187	248862	270598	249733	254184	457523	464305	587311	518362	509013	655479	3.67737e+06	349202	624764	619462	626074	541597	480396	529748	452872
0.804_325.2615		C19 H35 N O3	325.262	0.804						level5					6.31167e+06	3.77864e+06	6.45447e+06	4.13157e+06	5.71772e+06	6.45098e+06	4.54987e+06	6.11992e+06	6.43153e+06	3.51216e+06	5.75815e+06	4.78472e+06	1.1546e+07	2.15218e+07	1.96237e+07	2.10682e+07	1.17128e+07	2.18352e+07	6.86412e+06	9.8848e+06	9.12111e+06	3.03386e+06	5.0459e+06	5.59174e+06	8.02348e+06	8.95436e+06
0.804_655.5219		C38 H75 N O3 P2	655.522	0.804						level5					221914	198028	221570	221713	208877	216693	219212	208071	226244	208799	212520	382531	967981	491045	433397	1.09822e+06	548039	442371	291964	522359	517926	523454	452824	1.51099e+06	442917	378642
0.805_365.2928	N-linoleoyl-4-aminobutyric acid	C22 H39 N O3	365.293	0.805		S4942643	HMDB0062334			level4	Organic acids and derivatives	Carboxylic acids and derivatives	Amino acids, peptides, and analogues		9.54453e+06	1.22706e+07	1.16412e+07	1.17177e+07	1.03772e+07	1.11149e+07	1.07457e+07	1.12007e+07	1.17952e+07	1.02321e+07	1.1187e+07	1.33252e+07	1.12031e+07	3.13468e+07	4.58421e+07	1.5784e+07	1.60302e+07	1.40723e+07	8.20066e+06	1.43952e+07	1.62575e+07	3.37494e+07	1.20467e+08	1.70207e+07	4.19226e+07	2.16087e+07
0.807_351.2408		C20 H33 N O4	351.241	0.807					35.9	level5					3.53201e+06	2.65723e+06	4.13409e+06	3.79258e+06	3.86205e+06	3.8683e+06	2.22756e+06	3.81237e+06	3.17167e+06	3.72196e+06	4.08313e+06	1.09173e+06	8.51281e+06	6.80295e+06	1.34199e+06	1.40591e+06	3.67055e+06	8.02519e+06	1.43328e+06	2.30518e+06	1.43328e+06	8.20576e+06	9.77091e+06	1.00668e+07	8.71468e+06	9.16509e+06
0.807_443.2534	[similar to: l-tyrosine; δmass: 262.1795 da]		443.253	0.807						level5					2.59806e+06	3.48248e+06	2.37573e+06	4.41309e+06	2.32591e+06	3.61088e+06	2.80557e+06	2.9865e+06	3.43163e+06	2.32717e+06	3.31328e+06	6.44245e+06	4.13318e+06	8.03397e+06	1.67307e+06	6.4329e+06	4.80853e+06	4.80615e+06	2.17051e+06	4.91861e+06	1.79417e+06	6.17361e+06	9.87428e+06	5.3025e+06	5.28384e+06	7.51687e+06
0.809_309.2305	10-nitrooleate	C18 H33 N O4	309.231	0.809					31.6	level5					8.75806e+06	7.87005e+06	8.27463e+06	8.69917e+06	9.30263e+06	9.77966e+06	8.31869e+06	9.82014e+06	1.1989e+07	6.09908e+06	8.01685e+06	4.20546e+07	2.78291e+07	2.71133e+07	2.03493e+07	1.51389e+07	2.11746e+07	1.70441e+07	1.17285e+07	1.8248e+07	1.74727e+07	1.75587e+07	2.36738e+07	4.14838e+07	2.6957e+07	2.61958e+07
0.809_393.2893		C20 H43 N O4 S	393.289	0.809						level5					184458	165185	185484	186262	170309	177071	188653	174110	187638	172639	175173	323577	279044	353127	371245	369225	388067	295830	245797	434522	404708	3.7488e+06	4.64914e+06	324113	334724	327940
0.809_723.5062		C37 H74 N O10 P	723.506	0.809						level5					1.11598e+06	954850	651642	1.01194e+06	579860	855997	781238	1.15947e+06	729692	656166	1.00447e+06	729234	3.09166e+06	5.03346e+06	6.34691e+06	3.21168e+06	5.07402e+06	4.31147e+06	929329	2.08463e+06	2.24073e+06	3.20363e+06	1.05028e+06	2.95923e+06	2.55867e+06	3.75178e+06
0.81_341.2929	N-acetylsphingosine	C20 H39 N O3	341.293	0.81		MReference-1374			45.8	level3					4.54573e+07	4.54573e+07	4.54573e+07	4.54573e+07	4.54573e+07	4.54573e+07	4.54573e+07	4.54573e+07	4.54573e+07	4.54573e+07	4.54573e+07	7.47809e+07	1.68963e+08	1.54489e+08	1.65962e+08	1.25468e+08	6.44325e+07	9.05895e+07	4.01798e+07	4.63413e+07	7.54363e+07	3.06378e+08	4.77517e+08	9.73632e+07	1.71904e+08	9.42379e+07
0.81_368.2559	Carboprost	C21 H36 O5	368.256	0.81	C06872	S4444532			31.4	level4				NULL	3.67751e+06	3.16059e+06	3.14759e+06	3.3409e+06	2.47355e+06	3.65415e+06	3.0293e+06	3.06302e+06	3.48899e+06	2.85094e+06	3.39131e+06	1.02192e+07	4.60469e+06	3.8936e+06	1.52557e+06	2.59619e+06	1.29425e+06	2.83634e+06	687635	1.36707e+06	1.57447e+06	1.10756e+07	1.62867e+07	2.00325e+07	2.66992e+06	1.05607e+07
0.81_385.2619	(1s,2r,7r,8r,11r,12r)-12-methyl-6-methylene-17-oxa-14-azahexacyclo[10.6.3.1~5,8~.0~1,11~.0~2,8~.0~14,18~]docos-7-yl acetate	C24 H35 N O3	385.262	0.81	C08703	S390353			38	level4				NULL	5.77653e+06	4.12405e+06	5.42518e+06	5.49426e+06	4.76735e+06	5.39502e+06	5.37243e+06	4.72465e+06	4.64651e+06	5.37653e+06	5.50174e+06	5.85429e+06	1.10422e+07	1.4236e+07	1.84038e+07	1.45079e+07	1.09014e+07	5.24302e+06	7.40318e+06	1.27556e+07	1.03077e+07	1.27058e+07	2.52979e+07	6.06863e+06	1.43644e+07	6.71813e+06
0.81_789.3711		C37 H60 N O15 P	789.371	0.81						level5					4.23159e+06	3.60321e+06	3.91788e+06	4.32235e+06	4.08735e+06	4.00731e+06	4.12113e+06	4.39984e+06	3.72155e+06	3.76412e+06	4.24289e+06	2.28174e+07	4.25756e+06	1.30839e+07	1.46757e+07	1.89102e+07	1.55976e+07	8.18235e+06	9.11244e+06	1.42024e+07	1.16517e+07	1.29485e+07	3.89095e+06	5.02811e+06	3.91185e+06	3.86544e+06
0.811_104.0625	Styrene	C8 H8	104.062	0.811	C07083	S7220	HMDB0034240			level4	Benzenoids	Benzene and substituted derivatives	Styrenes	map01100 Metabolic pathways;	5.32874e+07	4.55276e+07	5.45109e+07	5.67309e+07	5.2162e+07	5.25225e+07	5.26033e+07	4.88971e+07	5.62946e+07	5.10203e+07	5.22653e+07	1.44561e+08	4.02941e+07	7.11417e+07	1.32021e+08	6.85213e+07	7.99142e+07	1.07226e+08	8.60126e+07	1.21919e+08	1.18455e+08	6.07157e+07	8.0753e+07	8.42179e+07	3.75367e+07	4.68725e+07
0.811_260.214		C18 H28 O	260.214	0.811						level5					2.7276e+07	2.74817e+07	3.36246e+07	3.17391e+07	3.8167e+07	2.65159e+07	3.06187e+07	1.89991e+07	4.47175e+07	3.68783e+07	2.71887e+07	9.9832e+07	8.61897e+07	1.49378e+08	2.16866e+08	4.52856e+07	2.91117e+08	5.12556e+07	7.42674e+07	1.28552e+08	1.39258e+08	8.02753e+07	2.30784e+08	5.11975e+07	1.18543e+08	1.53382e+08
0.811_266.1154	(2z)-3-(3,4,5-trimethoxyphenyl)-2-propen-1-yl acetate	C14 H18 O5	266.115	0.811		S30777517	HMDB0040891			level4	Benzenoids	Phenol ethers	Anisoles		4.34485e+07	4.01593e+07	4.12004e+07	4.12486e+07	4.36257e+07	4.50901e+07	4.37279e+07	2.68154e+07	4.68629e+07	4.43712e+07	5.04108e+07	1.12233e+08	3.61672e+07	1.05576e+08	6.49212e+07	1.09514e+08	6.25153e+07	8.82402e+07	7.29535e+07	6.61271e+07	6.22692e+07	6.25679e+07	3.71597e+07	6.49744e+07	5.89276e+07	3.99124e+07
0.811_280.0947	(2z)-3-[4,5-dihydroxy-2-(2-hydroxy-2-propanyl)-2,3-dihydro-1-benzofuran-7-yl]acrylic acid	C14 H16 O6	280.095	0.811		S35013671	HMDB0033884			level4	Phenylpropanoids and polyketides	Cinnamic acids and derivatives	Hydroxycinnamic acids and derivatives		1.30804e+07	7.9562e+06	1.37345e+07	1.41076e+07	8.13366e+06	1.48131e+07	7.80699e+06	7.36336e+06	1.37539e+07	1.30751e+07	1.24485e+07	3.74479e+07	1.04024e+07	3.10392e+07	2.0325e+07	3.67176e+07	2.13696e+07	3.03719e+07	1.23272e+07	3.2685e+07	1.65574e+07	2.02832e+07	1.06605e+07	1.83431e+07	1.01056e+07	1.32702e+07
0.811_386.1729	(+)-eudesmin	C22 H26 O6	386.173	0.811	C10561	S65896				level4	Phenylpropanoids	Lignans	Lignans	NULL	1.46188e+09	1.08734e+09	1.36118e+09	1.40504e+09	1.27179e+09	1.36519e+09	1.28261e+09	1.20372e+09	1.56764e+09	1.22347e+09	1.28774e+09	3.58598e+09	8.87196e+08	1.94168e+09	2.74264e+09	2.83939e+09	2.74824e+09	2.51312e+09	3.11254e+09	3.23353e+09	2.4062e+09	1.70208e+09	1.94391e+09	1.7579e+09	1.51688e+09	1.31167e+09
0.811_517.2684	{[(3alpha,7alpha,8xi,10xi,12alpha,13xi,17xi,20xi)-3,7,12-trihydroxy-24-oxocholan-24-yl]amino}methyl hydrogen sulfate	C25 H43 N O8 S	517.268	0.811		S388756				level4					612410	686356	735445	829332	544444	673838	680953	732444	439701	1.00214e+06	639196	5.66498e+06	1.06172e+06	3.50849e+06	2.44868e+06	748208	1.93874e+06	1.45799e+06	898074	2.25052e+06	2.47144e+06	1.14967e+06	862525	663762	1.08875e+06	536055
0.811_575.4031		C36 H54 N3 O P	575.403	0.811						level5					546683	455233	488852	408271	670253	422226	690073	644927	545960	422110	407302	1.0074e+06	2.14929e+06	1.66465e+06	1.0862e+06	1.28239e+06	4.55622e+06	516414	9.10462e+06	5.36332e+06	1.01784e+07	1.67679e+06	411402	1.44375e+06	862460	850779
0.811_667.4439		C35 H61 N3 O9	667.444	0.811						level5					3.26133e+06	3.02473e+06	3.53522e+06	4.84665e+06	3.176e+06	3.35985e+06	3.39306e+06	2.94736e+06	3.96434e+06	3.96835e+06	3.16577e+06	5.745e+06	9.27049e+06	1.31427e+07	3.39859e+07	3.2525e+07	2.09516e+07	1.62995e+07	9.82847e+06	1.50647e+07	1.65771e+07	1.58093e+07	6.94008e+06	1.19759e+07	7.02694e+06	8.8554e+06
0.812_529.3408		C25 H48 N5 O5 P	529.341	0.812						level5					1.82869e+06	1.89068e+06	2.20747e+06	1.97017e+06	1.63539e+06	1.94457e+06	1.87511e+06	2.64429e+06	1.4976e+06	1.84259e+06	1.90372e+06	1.61658e+06	2.95744e+06	8.97788e+06	3.83861e+06	3.91848e+06	2.67453e+06	6.01753e+06	1.22008e+06	2.94479e+06	1.16967e+06	7.55267e+06	1.83539e+06	1.07838e+07	3.94858e+06	6.36237e+06
0.813_117.058	Indole	C8 H7 N	117.058	0.813	C00463	S776	HMDB0000738			level4	Organoheterocyclic compounds	Indoles and derivatives	Indoles	map00380 Tryptophan metabolism; map00400 Phenylalanine, tyrosine and tryptophan biosynthesis; map01100 Metabolic pathways; map04974 Protein digestion and absorption;	9.78187e+06	7.64175e+06	1.07534e+07	9.55637e+06	7.54957e+06	6.87331e+06	8.94828e+06	9.86114e+06	7.23218e+06	1.01645e+07	8.75129e+06	1.98917e+07	1.17028e+07	2.45005e+07	1.94569e+07	2.17524e+07	1.79354e+07	1.97003e+07	1.2024e+07	1.66698e+07	1.75214e+07	2.49317e+07	2.38892e+07	1.70004e+07	1.46759e+07	1.73237e+07
0.813_241.2043		C14 H27 N O2	241.204	0.813						level5					7.56829e+06	5.47028e+06	9.36719e+06	9.0308e+06	9.06866e+06	9.28423e+06	5.14367e+06	8.89317e+06	9.77045e+06	5.83168e+06	9.14536e+06	2.2625e+07	1.15298e+07	2.34084e+07	1.28323e+07	1.55342e+07	1.19421e+07	1.78619e+07	1.39123e+07	1.37858e+07	1.93351e+07	8.98446e+06	7.78179e+06	9.45776e+06	1.10651e+07	1.03832e+07
0.814_239.1887		C14 H25 N O2	239.189	0.814						level5					1.23832e+06	1.62161e+06	1.26457e+06	1.05611e+06	1.74866e+06	1.41198e+06	1.3091e+06	1.33928e+06	1.19193e+06	1.08988e+06	1.93796e+06	1.24428e+06	3.68058e+06	4.53571e+06	698295	1.77746e+06	5.55943e+06	2.31904e+06	1.08703e+06	2.43109e+06	1.66115e+06	1.49439e+06	503621	1.20423e+06	2.96988e+06	1.58603e+06
0.814_361.2617	N-arachidonylglycine	C22 H35 N O3	361.262	0.814		S4446510	HMDB0005096			level4	Organic acids and derivatives	Carboxylic acids and derivatives	Amino acids, peptides, and analogues		1.03939e+07	1.22739e+07	1.50951e+07	9.85604e+06	1.17968e+07	1.29318e+07	1.21371e+07	9.97668e+06	1.44433e+07	1.12376e+07	1.15658e+07	3.66002e+07	2.4293e+07	3.87929e+07	3.34911e+07	2.78204e+07	1.58745e+07	2.59419e+07	1.06882e+07	1.4433e+07	1.73411e+07	3.64465e+07	6.00791e+07	2.27533e+07	2.96464e+07	2.35421e+07
0.814_562.5436		C36 H70 N2 O2	562.544	0.814						level5					1.51925e+07	1.7734e+07	1.35476e+07	1.99404e+07	4.8782e+06	1.42397e+07	1.58868e+07	1.13183e+07	1.36495e+07	1.03905e+07	1.745e+07	2.05979e+07	3.50931e+07	1.54976e+08	8.13754e+07	7.81474e+07	1.3869e+07	1.11078e+08	1.34887e+07	5.34975e+07	9.38847e+06	6.31154e+07	8.15464e+07	1.02607e+08	5.73807e+07	1.31268e+07
0.815_150.0681	3-phenylpropanoic acid	C9 H10 O2	150.068	0.815	C05629	S10181339	HMDB0000764			level4	Phenylpropanoids and polyketides	Phenylpropanoic acids	null	map00360 Phenylalanine metabolism; map01100 Metabolic pathways;	1.28176e+07	9.59096e+06	1.2457e+07	1.37718e+07	1.10783e+07	1.13919e+07	1.20594e+07	1.1818e+07	1.32021e+07	1.08967e+07	1.14905e+07	2.68549e+07	2.77638e+07	2.45528e+07	1.89701e+07	2.64512e+07	2.3918e+07	2.77857e+07	1.14885e+07	1.83089e+07	2.04472e+07	2.51908e+07	1.85803e+07	3.53857e+07	1.82924e+07	1.98633e+07
0.815_227.1886	Cyprodenate	C13 H25 N O2	227.189	0.815		S64892				level4					2.5288e+07	2.0127e+07	2.29083e+07	2.35076e+07	2.34697e+07	2.60067e+07	1.75852e+07	2.57238e+07	2.87084e+07	1.83496e+07	2.36753e+07	3.96961e+07	2.10764e+07	2.86858e+07	1.65385e+07	2.45172e+07	2.07086e+07	1.63812e+07	2.55508e+07	3.08097e+07	2.04464e+07	1.19891e+07	1.331e+07	2.46517e+07	1.82423e+07	2.82138e+07
0.815_338.2454	11-deoxy-pge1	C20 H34 O4	338.245	0.815		S4446182				level4					2.9875e+07	2.78022e+07	3.01093e+07	3.17288e+07	3.3682e+07	2.68561e+07	2.88045e+07	2.63819e+07	2.95027e+07	4.59168e+07	2.35536e+07	1.0727e+08	8.50474e+07	1.61959e+08	4.50494e+07	1.42284e+08	5.696e+07	7.10917e+07	3.088e+07	6.18367e+07	3.07737e+07	1.3673e+08	1.58902e+08	1.56122e+08	5.92885e+07	1.28666e+08
0.816_288.0898		C18 H12 N2 O2	288.09	0.816						level5					512213	601192	433880	497255	377829	675476	557462	433271	479189	378165	674742	278558	468930	316127	552815	335287	1.01938e+06	5.62664e+06	1.51921e+06	439820	2.56871e+06	335874	292864	284119	2.5833e+06	325326
0.816_613.4756		C36 H63 N5 O S	613.476	0.816						level5					963811	800669	712264	1.1337e+06	699242	927589	872114	710017	830597	1.14755e+06	752835	1.57302e+06	3.35111e+06	2.35374e+06	1.92726e+06	1.49868e+06	4.27493e+06	1.91358e+06	3.94515e+06	3.65282e+06	6.2984e+06	2.61725e+06	2.68663e+06	2.51883e+06	2.8487e+06	1.45213e+06
0.817_294.1831	Embelin	C17 H26 O4	294.183	0.817	C10342	S3105				level4				NULL	1.19254e+07	1.22228e+07	1.27886e+07	1.297e+07	1.24003e+07	1.25436e+07	1.22122e+07	1.24032e+07	1.42304e+07	1.03152e+07	1.32655e+07	1.84419e+07	1.29739e+07	3.00189e+07	1.3741e+07	2.38996e+07	1.85744e+07	2.1447e+07	8.09761e+06	1.74644e+07	1.26478e+07	2.5674e+07	2.17991e+07	3.4503e+07	2.83208e+07	2.58831e+07
0.817_339.2772	Mfcd01320532	C20 H37 N O3	339.277	0.817		S4941514	HMDB0013631			level4	Organic acids and derivatives	Carboxylic acids and derivatives	Amino acids, peptides, and analogues		1.23283e+07	1.23669e+07	1.19481e+07	1.60176e+07	1.417e+07	1.29958e+07	1.35261e+07	1.22647e+07	1.55195e+07	1.32384e+07	1.18926e+07	1.6025e+07	3.18512e+07	4.75433e+07	7.35477e+07	4.04796e+07	3.07005e+07	3.74746e+07	1.22061e+07	2.39189e+07	2.52581e+07	2.30933e+07	3.88055e+07	1.74934e+07	3.44026e+07	2.32817e+07
0.817_379.2722	Leukotriene b4 ethanolamide	C22 H37 N O4	379.272	0.817		S4446251	HMDB0002304			level4	Organic nitrogen compounds	Organonitrogen compounds	Amines		2.11057e+07	2.11156e+07	2.55125e+07	1.95695e+07	2.18153e+07	2.35059e+07	2.23054e+07	1.92031e+07	2.61078e+07	2.04811e+07	2.15348e+07	5.40813e+07	3.95158e+07	5.74359e+07	4.7945e+07	4.00596e+07	2.65497e+07	4.31833e+07	1.79811e+07	2.58508e+07	2.97086e+07	7.03383e+07	9.74199e+07	5.00796e+07	4.6229e+07	4.97793e+07
0.817_457.3403		C25 H47 N O6	457.34	0.817						level5					1.49392e+06	1.48535e+06	1.5073e+06	1.29846e+06	1.42182e+06	1.52948e+06	1.68145e+06	1.21428e+06	1.72055e+06	1.17396e+06	1.64801e+06	857604	3.37072e+06	2.74031e+06	3.34172e+06	4.61426e+06	4.94715e+06	4.31575e+06	1.27916e+06	4.40718e+06	1.89238e+06	3.82496e+06	1.67591e+06	6.62238e+06	3.58263e+06	3.03026e+06
0.819_276.1726	Cyclandelate	C17 H24 O3	276.173	0.819		S2790	HMDB0015586			level4	Benzenoids	Benzene and substituted derivatives	null		7.41775e+06	8.03414e+06	7.67005e+06	7.36131e+06	6.72774e+06	8.72272e+06	7.32039e+06	8.12556e+06	7.90252e+06	6.43379e+06	7.84944e+06	1.35806e+07	1.0112e+07	2.1156e+07	8.44102e+06	1.62157e+07	1.28882e+07	1.87158e+07	4.85403e+06	1.16591e+07	6.48405e+06	1.60874e+07	1.40352e+07	3.13993e+07	1.63761e+07	1.58699e+07
0.819_320.1621	3653579	C18 H24 O5	320.162	0.819	C14751	S4941916	HMDB0041838			level4	Fungal toxins	Mycotoxins	Others	NULL	537302	352773	471288	512640	418469	414473	369612	621116	342381	431087	509002	1.2768e+06	2.76479e+06	1.91331e+06	6.86094e+06	2.94535e+06	291291	533703	159365	296760	279641	980576	1.06213e+06	995279	307467	342372
0.82_362.2457	Ti1090000	C22 H34 O4	362.246	0.82	C14575	S18194				level4				NULL	1.02446e+07	8.93937e+06	1.08177e+07	9.71363e+06	9.62519e+06	1.07758e+07	9.99406e+06	9.28017e+06	1.14817e+07	9.1105e+06	9.76945e+06	1.75871e+07	1.32859e+07	1.57817e+07	1.26527e+07	1.01389e+07	1.00575e+07	1.67153e+07	7.90447e+06	1.02833e+07	1.2734e+07	3.57377e+07	4.05106e+07	3.17903e+07	1.61579e+07	2.73807e+07
0.82_451.189		C26 H30 N O4 P	451.189	0.82						level5					205446	207933	196366	201137	209781	204208	203652	204924	197308	215801	198929	1.26976e+07	311352	351780	528833	349745	400568	337742	896776	505304	454453	338439	428169	364765	488615	362810
0.821_298.27	[similar to: 2-linoleoyl glycerol; δmass: -56.0070 da]		298.27	0.821						level5					5.81113e+07	5.70298e+07	5.68445e+07	8.13014e+07	7.63824e+07	6.47086e+07	7.27667e+07	6.34627e+07	6.56008e+07	5.0258e+07	7.81808e+07	1.40787e+08	1.34718e+08	1.53644e+08	1.443e+08	1.15831e+08	1.39049e+08	1.34051e+08	8.96207e+07	1.47863e+08	1.77788e+08	1.0318e+08	7.52263e+07	1.65601e+08	1.44711e+08	1.40448e+08
0.822_337.2616		C20 H35 N O3	337.262	0.822						level5					1.54215e+07	1.50401e+07	1.69935e+07	1.68839e+07	1.41731e+07	1.63248e+07	1.59095e+07	1.56433e+07	1.80319e+07	1.31732e+07	1.6347e+07	2.32811e+07	2.71643e+07	3.561e+07	3.68516e+07	3.21156e+07	2.97803e+07	4.20646e+07	1.5507e+07	3.61051e+07	3.2544e+07	2.41488e+07	7.18099e+07	2.97093e+07	5.52364e+07	2.80953e+07
0.823_196.1465	Acetic acid geranyl ester	C12 H20 O2	196.147	0.823	C09861	S1266019	HMDB0035157			level4	Terpenoids	Monoterpenoids (C10)	Linear monoterpenes	NULL	1.67235e+07	1.00712e+07	1.01234e+07	1.14412e+07	1.47613e+07	1.15773e+07	1.46079e+07	8.71119e+06	1.38842e+07	1.25016e+07	1.35986e+07	2.74075e+07	3.41372e+07	3.53061e+07	9.90537e+06	1.81346e+07	3.43475e+07	1.86414e+07	7.41372e+06	2.94388e+07	1.14706e+07	1.47164e+07	1.40332e+07	1.85562e+07	1.8569e+07	1.82428e+07
0.823_297.2667	Spiroxamine	C18 H35 N O2	297.267	0.823	C11124	S77719				level4				NULL	2.16673e+08	2.8001e+08	2.35432e+08	2.41412e+08	3.30677e+08	2.53874e+08	2.27028e+08	2.30454e+08	2.53123e+08	3.1753e+08	2.35493e+08	3.92898e+08	4.56815e+08	5.95379e+08	5.10955e+08	9.08756e+07	5.3557e+08	5.34065e+08	3.3516e+08	5.8699e+08	8.79345e+08	3.92769e+08	4.558e+08	6.37356e+08	9.52249e+08	5.07178e+08
0.823_599.4614		C34 H67 N O3 P2	599.461	0.823						level5					1.69401e+06	1.39594e+06	1.60352e+06	1.64015e+06	1.77158e+06	1.56549e+06	1.75443e+06	1.66966e+06	1.3727e+06	1.72411e+06	1.64747e+06	4.48281e+06	5.59002e+06	5.27022e+06	4.66218e+06	8.67986e+06	9.3095e+06	2.71722e+06	4.04827e+06	6.51092e+06	5.59004e+06	4.38654e+06	4.44986e+06	4.01387e+06	3.14657e+06	3.1551e+06
0.824_278.0861		C18 H15 O P	278.086	0.824					58.8	level5					3.35666e+06	2.062e+06	3.3464e+06	3.75637e+06	1.69367e+06	3.58118e+06	4.32968e+06	2.07259e+06	3.44512e+06	1.92263e+06	3.50427e+06	7.157e+06	4.21906e+06	6.39177e+06	5.84397e+06	4.22222e+06	5.88147e+06	6.30948e+06	5.96213e+06	4.4586e+06	9.50824e+06	4.18757e+06	4.20525e+06	7.40382e+06	5.42256e+06	4.95732e+06
0.824_473.2931		C25 H48 N O P S2	473.293	0.824						level5					244958	217140	264118	266754	339614	247944	268358	230377	273094	192235	362238	326035	225376	484350	977338	526155	484519	1.09747e+06	505016	512169	529065	2.7112e+06	9.01815e+06	340440	1.40518e+06	702716
0.824_497.1841		C30 H27 N O6	497.184	0.824						level5					280584	159897	276548	200735	227836	278787	285129	145167	307204	258906	199095	192251	182593	264194	230433	238942	239634	4.9624e+06	1.30914e+06	673324	1.64725e+06	258488	256089	235309	556142	454522
0.824_838.5312		C36 H79 N4 O15 P	838.531	0.824						level5					193926	196458	187354	198342	217082	177159	204446	203559	190862	206929	186366	280813	4.10478e+06	433905	386924	403508	407210	335973	256503	866750	453671	763120	424758	364424	397597	390745
0.825_411.3367		C23 H46 N3 O P	411.337	0.825						level5					2.55728e+06	2.48276e+06	2.67103e+06	1.69892e+06	2.0126e+06	2.53875e+06	1.61664e+06	2.63083e+06	1.77275e+06	3.12466e+06	2.13375e+06	1.8984e+06	6.56861e+06	2.53958e+06	1.05724e+07	9.78723e+06	8.29776e+06	6.43612e+06	3.56424e+06	2.04102e+06	3.08505e+06	1.46493e+07	3.64296e+07	3.7245e+06	7.48011e+06	3.3417e+06
0.825_619.4289		C30 H64 N5 O2 P3	619.429	0.825						level5					525755	215304	331009	444173	370446	415765	349078	366020	342141	316310	440706	641043	1.76311e+06	495539	804512	1.24652e+06	4.20014e+06	426559	8.45791e+06	5.38235e+06	1.04285e+07	1.25395e+06	944419	923151	1.15292e+06	870606
0.826_665.4863		C42 H69 N O P2	665.486	0.826						level5					575398	515372	578821	581365	531666	585608	577595	507155	536664	490694	692113	1.01032e+06	1.04128e+06	1.32625e+06	1.12788e+06	1.14845e+06	1.45164e+06	1.18003e+06	724393	1.25047e+06	1.18584e+06	1.41224e+06	1.55933e+06	1.1972e+06	1.11796e+06	1.01507e+06
0.827_371.2462		C17 H34 N5 O2 P	371.246	0.827						level5					342751	352255	357887	518880	466475	338478	384077	348934	429050	386648	412127	146024	556642	161640	175256	165051	1.54195e+06	4.10745e+06	355106	1.53313e+06	305518	182679	262809	146944	2.12457e+06	230934
0.828_213.1731		C12 H23 N O2	213.173	0.828						level5					1.6643e+07	9.76338e+06	1.00007e+07	1.14576e+07	1.47764e+07	1.141e+07	1.44245e+07	8.65967e+06	1.36768e+07	1.23643e+07	1.3515e+07	2.68023e+07	3.40562e+07	3.36435e+07	1.04511e+07	1.91247e+07	3.35904e+07	2.08926e+07	8.07169e+06	2.92361e+07	1.22918e+07	1.4605e+07	1.33693e+07	1.67644e+07	1.90898e+07	1.86717e+07
0.828_373.2617	Myxalamid d	C23 H35 N O3	373.262	0.828	C12161	S10128297				level4				NULL	748103	1.13693e+06	1.05955e+06	1.25902e+06	854031	1.34434e+06	951855	875192	1.32528e+06	790496	1.09583e+06	860777	1.73798e+06	2.45932e+06	4.44425e+06	2.91492e+06	1.1253e+06	4.56597e+06	510599	1.60997e+06	783031	1.04434e+06	2.32054e+06	885128	2.87748e+06	1.02166e+06
0.828_449.2262		C25 H31 N5 O S	449.226	0.828						level5					906065	1.24405e+06	1.53889e+06	1.50128e+06	946789	1.70567e+06	1.21617e+06	1.10063e+06	1.3766e+06	1.3464e+06	1.0463e+06	7.4262e+06	8.33147e+06	3.7436e+06	3.11361e+06	1.12017e+07	707298	5.65187e+06	413455	549309	673917	1.0422e+07	1.93692e+07	1.87234e+06	1.71535e+06	1.2913e+06
0.829_391.2357	2172	C23 H29 N5 O	391.236	0.829		S30791812				level4					2.3281e+06	2.20157e+06	1.55902e+06	2.43634e+06	2.06517e+06	2.16651e+06	1.77749e+06	1.84852e+06	2.45476e+06	2.57605e+06	1.74018e+06	9.90965e+06	1.28751e+07	1.18401e+07	7.92115e+06	2.41604e+07	1.2908e+06	1.74961e+06	802875	997045	1.05507e+06	1.02662e+07	1.877e+07	1.17014e+07	1.77847e+06	4.10631e+06
0.829_441.2883		C27 H39 N O4	441.288	0.829						level5					1.67825e+06	1.6947e+06	1.46705e+06	1.80692e+06	1.63202e+06	1.65233e+06	1.64944e+06	1.65142e+06	1.66801e+06	1.6313e+06	1.65811e+06	2.18009e+06	1.63361e+06	2.67342e+06	2.87307e+06	3.66388e+06	4.86362e+06	2.04118e+06	1.84178e+06	3.72233e+06	2.19451e+06	1.95378e+07	2.31602e+07	2.77095e+06	7.16125e+06	3.58798e+06
0.831_657.5022		C37 H73 N O4 P2	657.502	0.831						level5					441423	556922	511379	821222	502367	810099	454231	544819	609771	492490	626805	1.36329e+06	1.97886e+06	1.56107e+06	1.665e+06	2.08719e+06	2.66454e+06	863274	3.27289e+06	2.535e+06	3.93816e+06	1.75093e+06	1.52357e+06	1.65591e+06	1.88433e+06	1.19243e+06
0.832_367.2355		C21 H37 N S2	367.236	0.832						level5					2.35036e+06	1.50606e+06	1.77011e+06	2.00948e+06	2.53323e+06	1.74041e+06	2.18085e+06	2.10765e+06	1.93048e+06	1.93377e+06	1.90827e+06	3.6243e+06	2.71724e+06	2.69932e+06	3.15457e+06	6.627e+06	1.39787e+06	1.70271e+06	516124	1.36759e+06	1.52347e+06	8.56024e+06	1.20558e+07	9.77585e+06	1.3959e+06	5.58817e+06
0.832_379.1207		C25 H17 N O3	379.121	0.832						level5					136730	207395	164191	157269	205447	119709	175671	155899	159756	176039	177643	95522.4	83224.8	123191	109407	106360	122185	2.92243e+06	282233	225843	469607	138127	122279	112822	250262	106696
0.832_469.3219		C28 H44 N3 O P	469.322	0.832						level5					1.63102e+07	1.91425e+07	1.82406e+07	1.88061e+07	1.68984e+07	1.85308e+07	1.82243e+07	1.54866e+07	2.08024e+07	1.56185e+07	1.96035e+07	3.9955e+07	3.94444e+07	6.90403e+07	8.47064e+07	7.05235e+07	3.30713e+07	5.02963e+07	2.23112e+07	3.61986e+07	2.92293e+07	9.5906e+07	9.89651e+07	3.43282e+07	5.89077e+07	2.99215e+07
0.832_491.3039	Bardoxolone	C31 H41 N O4	491.304	0.832		S354529				level4					1.43898e+07	1.64946e+07	1.54024e+07	1.649e+07	1.45558e+07	1.61632e+07	1.5782e+07	1.33432e+07	1.80648e+07	1.35838e+07	1.69152e+07	3.58465e+07	3.50438e+07	6.39726e+07	7.02973e+07	6.11143e+07	2.82476e+07	4.49699e+07	1.88593e+07	3.1078e+07	2.41464e+07	8.62153e+07	8.7534e+07	3.1391e+07	5.05942e+07	2.68722e+07
0.832_493.3198		C31 H43 N O4	493.32	0.832						level5					850394	790177	1.04363e+06	852450	850037	1.05059e+06	920285	872128	1.09778e+06	581221	1.05737e+06	1.67937e+06	2.18566e+06	3.92778e+06	2.8615e+06	4.95918e+06	1.78819e+06	4.64165e+06	1.48428e+06	1.86372e+06	2.0095e+06	8.50041e+06	5.50689e+06	1.10491e+06	3.23793e+06	2.33991e+06
0.832_531.1688		C33 H25 N O6	531.169	0.832						level5					159172	197527	167684	137472	190380	216745	162324	201557	185789	194296	124882	93523.2	82097	122254	110715	106187	295655	3.76825e+06	1.11372e+06	210980	1.75505e+06	136871	116186	111126	1.21665e+06	341559
0.833_214.1207	5-hexyl-2-oxotetrahydro-3-furancarboxylic acid	C11 H18 O4	214.121	0.833		S8551389	HMDB0030984			level4	Organoheterocyclic compounds	Lactones	Gamma butyrolactones		2.83928e+06	2.88973e+06	3.69277e+06	3.56399e+06	3.27788e+06	2.27274e+06	3.37777e+06	2.71214e+06	2.46299e+06	4.02414e+06	3.51486e+06	5.60981e+06	6.58094e+06	6.67381e+06	6.79305e+06	1.01602e+07	701985	1.92232e+06	942775	2.31254e+06	834952	9.67833e+06	1.65368e+07	8.91585e+06	1.06571e+06	9.32057e+06
0.833_343.2357			343.236	0.833						level5					810673	896510	911723	606734	985416	779622	864795	874558	763672	878787	799780	2.17023e+06	950168	1.04443e+06	663410	842547	895136	1.09122e+06	475433	887670	754183	7.03666e+06	4.29379e+06	5.92958e+06	859810	3.4905e+06
0.833_350.2454	10-gingerol	C21 H34 O4	350.245	0.833	C17496	S147055	HMDB0033616			level4	Benzenoids	Phenols	Methoxyphenols	NULL	1.81312e+06	1.40065e+06	1.23954e+06	1.4186e+06	1.03694e+06	2.0421e+06	1.28186e+06	1.3553e+06	1.58879e+06	1.46209e+06	1.25712e+06	8.05112e+06	2.97534e+06	2.70924e+06	1.84049e+06	1.60121e+06	1.33646e+06	1.67562e+06	676702	1.17574e+06	1.19179e+06	8.77287e+06	4.3596e+06	1.32913e+07	1.0752e+06	4.29802e+06
0.833_365.2564		C15 H36 N5 O3 P	365.256	0.833						level5					271910	249394	360366	209990	253224	274489	269666	254836	271328	272034	263417	330060	327340	422084	335179	295952	337970	403082	191378	346186	312920	4.12875e+06	5.91959e+06	1.71397e+06	496893	915907
0.833_447.3357	N-stearoyltyrosine	C27 H45 N O4	447.336	0.833		S2284895				level4					5.97615e+06	6.75092e+06	7.25628e+06	4.99783e+06	5.78475e+06	6.31602e+06	6.61863e+06	5.66155e+06	6.76057e+06	5.63722e+06	6.33737e+06	6.14154e+06	2.61299e+07	2.10345e+07	3.4579e+07	2.13555e+07	1.4788e+07	2.63175e+07	9.45535e+06	1.88638e+07	1.8686e+07	7.40007e+07	3.85869e+07	1.70197e+07	2.54274e+07	1.15036e+07
0.833_641.4862		C40 H67 N O3 S	641.486	0.833						level5					198435	161483	222018	147216	216121	188483	186047	176108	183652	212503	174719	151104	102161	166638	524791	231849	365149	129629	247551	271049	367242	631233	469489	166123	436944	541477
0.834_237.1366	Viloxazine	C13 H19 N O3	237.137	0.834		S5464				level4					341742	355740	242968	427768	413999	299090	485265	408689	327824	238862	406898	625733	329086	366213	899924	430470	665472	531534	267189	483973	691403	1.10152e+06	1.24751e+06	831372	1.3734e+06	2.50268e+06
0.834_313.2615	Palgly	C18 H35 N O3	313.262	0.834		S133100	HMDB0013034			level4	Organic acids and derivatives	Carboxylic acids and derivatives	Amino acids, peptides, and analogues		1.14435e+08	8.26095e+07	1.44172e+08	1.32956e+08	1.38373e+08	1.3028e+08	6.94964e+07	1.33179e+08	8.17152e+07	1.44849e+08	1.51891e+08	4.25572e+08	3.60436e+08	2.50483e+08	2.82611e+08	1.21254e+08	1.14907e+08	1.20782e+08	1.80538e+08	1.15667e+08	1.97979e+08	1.12889e+08	2.39231e+08	4.51015e+08	2.76788e+08	1.66349e+08
0.834_505.217		C22 H35 N O12	505.217	0.834						level5					966298	772960	1.06963e+06	1.07944e+06	893964	1.20181e+06	927485	1.02673e+06	858059	1.2284e+06	793841	4.42491e+06	5.14596e+06	2.03432e+06	4.23474e+06	1.14467e+07	2.26549e+06	4.55629e+06	1.14824e+06	1.9959e+06	2.02248e+06	7.96949e+06	2.45776e+07	1.75833e+06	1.76597e+06	1.57597e+06
0.834_643.4869		C43 H66 N O P	643.487	0.834						level5					1.00458e+06	918827	972364	1.14421e+06	971055	939206	1.06571e+06	871294	1.06045e+06	867790	1.16133e+06	3.09378e+06	4.24627e+06	3.79609e+06	3.40435e+06	7.12084e+06	6.39958e+06	2.26556e+06	2.7069e+06	4.42153e+06	4.17365e+06	2.88686e+06	3.26948e+06	3.61742e+06	2.04436e+06	2.82293e+06
0.835_371.152	Trazodone	C19 H22 Cl N5 O	371.152	0.835	C07156	S5332	HMDB0014794			level4	Organoheterocyclic compounds	Diazinanes	Piperazines	NULL	156051	158231	159182	140351	181328	158570	153224	165657	159403	142060	169555	96119.4	80624.3	135411	179113	140992	1.08545e+06	3.46224e+06	3.43085e+06	786331	2.31238e+06	145848	191960	107829	179085	332527
0.835_467.3037	Buprenorphine	C29 H41 N O4	467.304	0.835	C08007	S559124	HMDB0015057			level4	Benzenoids	Phenanthrenes and derivatives	null	NULL	2.71613e+07	2.79556e+07	2.70385e+07	2.70192e+07	2.72818e+07	2.77882e+07	2.70239e+07	2.68436e+07	2.98349e+07	2.41642e+07	2.88231e+07	5.74774e+07	6.11013e+07	1.31393e+08	1.25132e+08	1.02279e+08	5.26929e+07	7.44094e+07	4.38778e+07	4.71189e+07	4.34586e+07	1.32307e+08	1.5159e+08	5.97018e+07	8.62679e+07	5.39543e+07
0.836_310.1276		C12 H22 O9	310.128	0.836						level5					102632	104186	117035	121464	102769	110117	110698	103447	116046	102350	113960	235735	6.30205e+06	255764	246193	234440	258561	242597	155235	292900	271904	225602	260277	263336	278238	195258
0.836_320.235	(+/-)11(12)-eet	C20 H32 O3	320.235	0.836		MReference-9807			90.6	level3					7.42816e+07	7.54702e+07	8.7634e+07	7.83022e+07	7.61543e+07	7.94252e+07	8.0023e+07	6.72361e+07	8.77253e+07	7.67513e+07	7.9967e+07	1.04833e+08	1.67427e+08	2.21667e+08	3.93029e+08	3.52348e+08	1.30871e+08	1.69946e+08	9.14389e+07	1.24047e+08	1.12617e+08	2.04327e+08	3.92414e+08	2.02757e+08	2.88821e+08	2.35041e+08
0.836_325.1313	(s)-(+)-bulbocapnine	C19 H19 N O4	325.131	0.836	C09367	S11934				level4	Alkaloids	Alkaloids derived from tyrosine	Isoquinoline alkaloids	NULL	345688	344714	277270	374338	479784	338687	377950	350828	383041	338684	342111	87519.2	70383.3	103936	97467.4	96301.8	3.75667e+06	1.38469e+06	932936	3.37958e+06	1.05111e+06	91178.5	102960	102942	1.34106e+06	293036
0.836_445.3202	Oleoyl tyrosine	C27 H43 N O4	445.32	0.836		S32698867	HMDB0062337			level4	Organic acids and derivatives	Carboxylic acids and derivatives	Amino acids, peptides, and analogues		5.28694e+07	5.72909e+07	6.47388e+07	5.88525e+07	5.57823e+07	6.79615e+07	5.07062e+07	5.26005e+07	6.93576e+07	5.34242e+07	6.01392e+07	1.10755e+08	1.54071e+08	2.93599e+08	2.23192e+08	2.28238e+08	1.22749e+08	1.62511e+08	7.58245e+07	1.25614e+08	8.90893e+07	2.89456e+08	2.64174e+08	1.35434e+08	1.65601e+08	1.23176e+08
0.837_295.251		C18 H33 N O2	295.251	0.837						level5					7.37149e+07	9.38841e+07	8.3356e+07	8.0176e+07	1.06068e+08	9.00218e+07	8.35718e+07	8.3175e+07	9.03647e+07	9.40958e+07	7.909e+07	1.40926e+08	2.11174e+08	2.13734e+08	1.19065e+08	1.23321e+08	1.52513e+08	1.13861e+08	9.76359e+07	1.5781e+08	2.07786e+08	1.08506e+08	8.73589e+07	2.9086e+08	2.69709e+08	1.78152e+08
0.837_355.2722		C20 H37 N O4	355.272	0.837						level5					3.51659e+06	2.28514e+06	3.00346e+06	3.13312e+06	3.00402e+06	3.30359e+06	2.61946e+06	2.99586e+06	4.42613e+06	2.54707e+06	2.48037e+06	5.52491e+06	8.37972e+06	9.90196e+06	8.72175e+06	7.83649e+06	4.53821e+06	5.46383e+06	3.59046e+06	6.75861e+06	5.14453e+06	1.03541e+07	1.01568e+07	8.75748e+06	5.21426e+06	7.17797e+06
0.837_360.2661	Drostanolone propionate	C23 H36 O3	360.266	0.837		S194604				level4					378802	273235	344171	312758	343465	330220	331450	334261	447717	315444	254669	130891	94451.3	282741	304651	416033	2.65159e+06	131364	1.0535e+06	118297	4.66016e+06	356156	162758	524917	331225	351942
0.838_393.2514		C16 H36 N5 O4 P	393.251	0.838						level5					4.28769e+06	2.81174e+06	3.85755e+06	3.54053e+06	3.45298e+06	3.52769e+06	3.35233e+06	4.22355e+06	3.38042e+06	3.21338e+06	3.68806e+06	8.06417e+06	2.23756e+06	1.89438e+06	1.95245e+06	1.69965e+06	1.87082e+06	5.87253e+06	3.15203e+06	2.17041e+06	2.9183e+06	1.33096e+07	2.66624e+07	1.58373e+07	4.01992e+06	1.16887e+07
0.839_275.2251		C18 H29 N O	275.225	0.839						level5					4.82814e+06	4.94946e+06	4.93151e+06	4.75563e+06	5.60338e+06	5.77905e+06	4.83964e+06	4.83461e+06	5.91252e+06	5.03079e+06	4.48888e+06	1.13127e+07	1.08619e+07	9.35585e+06	9.47338e+06	8.25268e+06	7.94897e+06	9.78756e+06	4.13052e+06	1.00301e+07	1.04883e+07	6.06259e+06	1.47477e+07	1.07684e+07	1.13718e+07	1.1966e+07
0.839_345.2302		C21 H31 N O3	345.23	0.839						level5					1.09931e+06	1.95434e+06	1.85846e+06	1.46829e+06	2.42288e+06	1.66758e+06	1.9731e+06	1.61798e+06	1.58337e+06	2.26627e+06	1.28496e+06	730145	2.05318e+06	836970	3.03194e+06	1.33142e+06	2.39033e+06	7.31848e+06	1.75265e+06	2.58058e+06	2.75196e+06	1.20612e+06	1.03821e+06	3.05416e+06	5.28483e+06	2.17863e+06
0.839_403.2932		C21 H41 N O6	403.293	0.839						level5					4.85561e+06	4.56722e+06	4.75667e+06	4.53996e+06	4.37176e+06	5.73375e+06	4.64132e+06	4.7245e+06	3.82392e+06	4.86618e+06	5.33054e+06	1.6955e+07	1.33728e+07	1.09013e+07	1.33572e+07	1.62461e+07	7.02378e+06	9.29013e+06	4.58931e+06	7.90447e+06	4.25125e+06	8.76479e+06	8.96915e+06	2.3512e+07	1.34594e+07	6.69621e+06
0.84_399.2256	4-[({1-[2-carboxy-3-(2-methoxyethoxy)propyl]cyclopentyl}carbonyl)amino]cyclohexanecarboxylic acid	C20 H33 N O7	399.226	0.84		S110270				level4					1.0955e+06	842297	1.06033e+06	1.50565e+06	819123	1.1261e+06	1.03955e+06	1.26135e+06	1.35911e+06	1.07324e+06	686792	2.81427e+06	3.18108e+06	1.85201e+06	2.06899e+06	4.32531e+06	560010	493369	327180	467971	580017	4.2691e+06	1.49972e+07	5.018e+06	1.08568e+06	1.92864e+06
0.84_654.3076		C32 H51 N2 O8 P S	654.308	0.84						level5					605764	567792	699787	645393	668766	624154	616224	679977	641179	553058	678671	1.96125e+06	2.18058e+06	1.10798e+06	931192	1.45895e+06	1.48861e+06	1.17372e+06	850202	1.10821e+06	1.30631e+06	800282	2.02254e+06	1.76349e+06	915439	1.75973e+06
0.841_163.0128	Iberin	C5 H9 N O S2	163.013	0.841		S10023	HMDB0006095			level4	Organosulfur compounds	Sulfoxides	null		2.46261e+06	2.10297e+06	2.17298e+06	2.69735e+06	3.16393e+06	2.33056e+06	2.31954e+06	2.86267e+06	1.99022e+06	2.63955e+06	2.53974e+06	6.18323e+06	3.61624e+06	1.80381e+07	2.75059e+06	3.41816e+06	8.42248e+06	3.08026e+06	2.87714e+06	5.52251e+06	5.12922e+06	1.26816e+06	1.26931e+06	5.23406e+06	4.6414e+06	6.85652e+06
0.841_182.131	Yq3683000	C11 H18 O2	182.131	0.841		S28797				level4					1.91161e+07	1.2893e+07	1.11427e+07	1.29646e+07	1.14445e+07	1.233e+07	1.55263e+07	1.19255e+07	1.47654e+07	1.1184e+07	1.50901e+07	3.41503e+07	2.34398e+07	4.00455e+07	1.35713e+07	1.98045e+07	2.37356e+07	1.82619e+07	1.06379e+07	1.98894e+07	1.553e+07	2.19314e+07	2.44037e+07	2.77339e+07	1.64281e+07	2.02689e+07
0.841_199.1575	11-nitro-1-undecene	C11 H21 N O2	199.157	0.841		S473391	HMDB0062669			level4	Organic 1,3-dipolar compounds	Allyl-type 1,3-dipolar organic compounds	Organic nitro compounds		9.99944e+06	5.67657e+06	5.92821e+06	6.57568e+06	5.84567e+06	6.90171e+06	1.00121e+07	6.16218e+06	7.00296e+06	5.70541e+06	7.18068e+06	1.88822e+07	1.54141e+07	2.85414e+07	5.42754e+06	1.15066e+07	1.66048e+07	1.1335e+07	7.40414e+06	1.42623e+07	1.16965e+07	8.75111e+06	7.93836e+06	5.89792e+06	9.69176e+06	8.33739e+06
0.841_296.2543		C19 H36 S	296.254	0.841						level5					3.20148e+07	3.21862e+07	2.99281e+07	3.43188e+07	3.23124e+07	3.50001e+07	3.06031e+07	2.9943e+07	3.62003e+07	3.13845e+07	3.18678e+07	5.64098e+07	2.07583e+07	3.81552e+07	2.83551e+07	2.45983e+07	1.24296e+08	4.09897e+07	3.02001e+07	1.14271e+08	4.64504e+07	4.80551e+07	4.21695e+07	5.20565e+08	4.91092e+07	5.26035e+07
0.841_311.2459		C18 H33 N O3	311.246	0.841					93.1	level5					2.73038e+07	4.30749e+07	3.64948e+07	4.40013e+07	4.88509e+07	3.91786e+07	3.72391e+07	5.59177e+07	2.39359e+07	5.2528e+07	3.38707e+07	6.65461e+07	4.90726e+07	4.99719e+07	3.19096e+07	4.12099e+07	2.91453e+07	4.8276e+07	4.03505e+07	3.41255e+07	4.10269e+07	4.50954e+07	1.27256e+08	1.33214e+08	7.78921e+07	1.33359e+08
0.842_186.1258	Queen bee acid	C10 H18 O3	186.126	0.842		S4472163				level4					447879	432854	416361	455940	434616	448027	439841	401112	495684	412536	442050	1.51328e+06	188416	344598	256495	185222	250305	187486	217181	252475	233212	4.01153e+06	2.0448e+06	5.61837e+06	283832	1.77263e+06
0.842_340.2249	Terguride	C20 H28 N4 O	340.225	0.842		S392004				level4					5.39561e+06	4.12687e+06	7.0943e+06	5.72747e+06	5.62886e+06	5.18072e+06	6.70527e+06	5.3285e+06	4.59414e+06	5.6897e+06	5.92936e+06	1.08045e+07	8.86703e+06	1.03994e+07	1.0239e+07	6.50086e+06	6.47574e+06	5.75944e+06	3.02599e+06	6.21066e+06	8.15966e+06	7.66585e+06	2.66669e+07	1.74833e+07	8.64464e+06	1.05863e+07
0.842_409.2645		C19 H41 Cl N3 O2 P	409.264	0.842						level5					827046	827046	827046	827046	827046	827046	827046	827046	827046	827046	827046	2.13001e+06	1.29857e+06	2.20923e+06	1.97776e+06	293143	2.42581e+06	3.53122e+06	3.00683e+06	1.73935e+06	4.32437e+06	9.60712e+06	2.56778e+07	2.41081e+06	6.0894e+06	1.07637e+06
0.842_441.2364		C23 H31 N5 O4	441.236	0.842						level5					1.83709e+06	2.36309e+06	1.60935e+06	1.60967e+06	1.98772e+06	1.95107e+06	1.84926e+06	1.96044e+06	2.14795e+06	1.68821e+06	1.75895e+06	3.00595e+06	2.59847e+06	2.08052e+06	1.81708e+06	4.58386e+06	2.25116e+06	2.80092e+06	1.34173e+06	2.68583e+06	2.43745e+06	8.62149e+06	4.45781e+07	8.02017e+06	1.95634e+06	4.80679e+06
0.842_443.3036		C27 H41 N O4	443.304	0.842						level5					3.34203e+07	2.89261e+07	3.56307e+07	3.86267e+07	2.80195e+07	4.12486e+07	3.28747e+07	3.10817e+07	4.15079e+07	2.42499e+07	3.7724e+07	5.5227e+07	6.72523e+07	1.12999e+08	9.52279e+07	1.11936e+08	7.30293e+07	8.58858e+07	3.98381e+07	8.76413e+07	6.23078e+07	2.21124e+08	2.52932e+08	6.78696e+07	1.1543e+08	6.06091e+07
0.842_96.0938		C7 H12	96.0938	0.842						level5					727119	647289	441176	694492	638616	848993	570559	695798	578276	588898	692555	741984	277633	1.90117e+06	2.98992e+06	228395	407862	1.69747e+06	1.05636e+06	518874	215135	1.67905e+06	283941	4.97667e+06	1.59496e+06	1.86029e+06
0.843_311.0827		C15 H13 N5 O S	311.083	0.843						level5					1.2009e+06	1.11104e+06	1.08238e+06	1.29639e+06	1.39791e+06	1.13552e+06	1.3258e+06	1.27309e+06	1.23362e+06	1.05961e+06	1.23157e+06	2.86399e+06	6.62637e+06	3.67977e+06	6.75668e+06	1.0541e+07	1.28994e+06	1.95631e+06	632389	1.05004e+06	655520	1.8437e+06	1.56969e+06	1.27013e+06	1.50485e+06	2.08763e+06
0.843_336.2663	Pregnanetriol	C21 H36 O3	336.266	0.843	C14680	S92121			74.3	level4				NULL	4.86986e+06	4.38367e+06	1.96405e+06	5.22981e+06	4.48885e+06	2.26182e+06	4.41177e+06	2.55261e+06	4.571e+06	4.01804e+06	4.29332e+06	2.75727e+06	9.63818e+06	7.9866e+06	9.90136e+06	1.24293e+07	1.80546e+07	6.12556e+06	4.72634e+06	1.15147e+07	2.26535e+07	1.53075e+07	1.04998e+07	1.22489e+07	4.01945e+06	9.4452e+06
0.844_291.2199	Penbutolol	C18 H29 N O2	291.22	0.844	C07416	S34369	HMDB0015447			level4	Benzenoids	Phenol ethers	null	NULL	5.37531e+06	4.6383e+06	4.91071e+06	5.33768e+06	5.36616e+06	5.0325e+06	5.05505e+06	5.23192e+06	5.04182e+06	5.32769e+06	4.87922e+06	1.59824e+07	8.08868e+06	1.0129e+07	8.76953e+06	8.37192e+06	9.13501e+06	5.06247e+06	5.4383e+06	7.95026e+06	8.59548e+06	1.11522e+07	9.30056e+06	1.20006e+07	1.00737e+07	1.30208e+07
0.844_419.3035	N-palmitoyltyrosine	C25 H41 N O4	419.303	0.844		S344800				level4					2.9627e+07	2.69293e+07	3.36745e+07	3.64839e+07	2.56993e+07	3.59175e+07	2.54371e+07	2.57852e+07	3.51548e+07	2.80382e+07	3.45752e+07	4.72368e+07	1.00196e+08	1.10417e+08	1.01735e+08	1.43567e+08	6.87323e+07	1.02403e+08	3.53907e+07	6.45413e+07	6.45567e+07	1.82085e+08	1.26397e+08	7.09959e+07	9.88654e+07	5.68909e+07
0.844_443.3059		C28 H37 N5	443.306	0.844						level5					1.30046e+06	1.16725e+06	1.30817e+06	1.27224e+06	1.04679e+06	1.52022e+06	1.11905e+06	1.03307e+06	1.23073e+06	1.3384e+06	1.33745e+06	3.49218e+06	2.61194e+06	5.87505e+06	6.94342e+06	5.82154e+06	2.15916e+06	3.34878e+06	1.0773e+06	2.38547e+06	1.1303e+06	5.77093e+06	6.24281e+06	1.69505e+06	2.44367e+06	4.00357e+06
0.844_657.4804		C34 H68 N5 O3 P S	657.48	0.844						level5					99268.7	100412	114687	118637	100306	105162	105375	103696	115096	101139	105079	230394	178973	264839	256505	228627	275367	240235	152874	257686	267189	231870	238571	262493	222329	208318
0.845_316.2612	9,10-dihydroxystearic acid	C18 H36 O4	316.261	0.845	C19622	S80658				level4					2.02191e+07	1.36434e+07	1.39947e+07	2.21235e+07	1.37122e+07	2.1093e+07	1.50551e+07	1.61064e+07	1.76036e+07	1.60182e+07	1.70905e+07	228496	2.80888e+06	184247	203970	182759	7.65186e+07	1.86747e+06	6.44308e+06	1.00728e+08	6.66287e+06	2.21291e+07	166906	3.82792e+08	6.01817e+06	1.94902e+06
0.845_317.2646	[similar to: 2-amino-1,3,4-octadecanetriol; δmass: -0.0284 da]		317.265	0.845						level5					2.5739e+06	2.24991e+06	2.33471e+06	2.90508e+06	2.43989e+06	3.33477e+06	2.21971e+06	2.72255e+06	3.08792e+06	1.924e+06	2.63522e+06	165099	395747	164642	167949	158801	1.25391e+07	304591	820631	1.5568e+07	1.07492e+06	3.37058e+06	151097	6.87071e+07	550048	266767
0.845_361.2826		C20 H35 N5 O	361.283	0.845						level5					8.64368e+06	8.64368e+06	8.64368e+06	8.64368e+06	8.64368e+06	8.64368e+06	8.64368e+06	8.64368e+06	8.64368e+06	8.64368e+06	8.64368e+06	2.37231e+07	1.38472e+07	2.48446e+07	2.2504e+07	1.53386e+07	1.10459e+07	1.36647e+07	7.80226e+06	1.33064e+07	1.47556e+07	5.25696e+07	3.4136e+07	3.95677e+07	2.43817e+07	2.59555e+07
0.845_369.2515		C14 H36 N5 O4 P	369.252	0.845					74	level5					1.24453e+07	1.24453e+07	1.24453e+07	1.24453e+07	1.24453e+07	1.24453e+07	1.24453e+07	1.24453e+07	1.24453e+07	1.24453e+07	1.24453e+07	1.95204e+07	1.24658e+07	1.11392e+07	1.34167e+07	1.02688e+07	9.00207e+06	1.53016e+07	8.51262e+06	5.85124e+06	1.09481e+07	5.67097e+07	7.84993e+07	6.25093e+07	1.28342e+07	3.16257e+07
0.845_681.4784		C34 H73 N3 O4 P2 S	681.478	0.845						level5					270172	270172	270172	270172	270172	270172	270172	270172	270172	270172	270172	454943	430715	816109	476302	688819	744635	481814	322016	698950	796820	2.46896e+06	1.51799e+06	1.17247e+06	489496	596258
0.846_170.1308	2361	C10 H18 O2	170.131	0.846		S12282	HMDB0037116			level4	Organoheterocyclic compounds	Lactones	Delta valerolactones		1.74388e+06	1.81346e+06	1.99367e+06	1.97893e+06	2.27111e+06	1.8574e+06	1.98294e+06	1.71813e+06	2.127e+06	1.72181e+06	2.15468e+06	4.01025e+06	2.5375e+06	4.44946e+06	6.14771e+06	7.87751e+06	3.60448e+06	1.58063e+06	1.8329e+06	2.12414e+06	2.12731e+06	5.08345e+06	6.50075e+06	1.04987e+07	2.6936e+06	4.81128e+06
0.846_298.2507	Ricinelaidic acid	C18 H34 O3	298.251	0.846		S393218				level4					1.96752e+07	1.45902e+07	1.48108e+07	2.11958e+07	1.33373e+07	2.02485e+07	1.60894e+07	1.7104e+07	1.65187e+07	1.63086e+07	1.69611e+07	6.93631e+06	6.73256e+06	3.88462e+06	2.9031e+06	2.69038e+06	6.72941e+07	6.47458e+06	9.6283e+06	8.98191e+07	1.03999e+07	2.0667e+07	4.93972e+06	3.2379e+08	1.05095e+07	6.93052e+06
0.846_335.246	Oxeladin	C20 H33 N O3	335.246	0.846		S4458				level4					6.80312e+06	6.92635e+06	6.74714e+06	7.87754e+06	7.34925e+06	7.16245e+06	7.43374e+06	6.22195e+06	8.05106e+06	6.4239e+06	7.63123e+06	1.80695e+07	1.00724e+07	1.83018e+07	1.22133e+07	1.05414e+07	9.71589e+06	1.14722e+07	5.01766e+06	7.34874e+06	8.26123e+06	2.15713e+07	2.14633e+07	1.47958e+07	5.82395e+06	1.39287e+07
0.846_707.4806		C39 H72 N3 O2 P3	707.481	0.846						level5					76133.9	78731.7	91799.4	96615.3	82769.6	95466.8	79842.8	75151.1	99836.2	72146.9	95726.1	181519	384213	190148	192037	217411	1.4466e+06	186299	2.67098e+06	1.79182e+06	2.49889e+06	183954	172503	323033	185642	162567
0.847_331.2146	Megastachine	C20 H29 N O3	331.215	0.847	C09888	S390920				level4				NULL	2.98879e+06	2.03101e+06	1.63726e+06	1.41641e+06	3.11975e+06	2.02936e+06	2.61462e+06	1.61564e+06	2.65566e+06	1.66615e+06	2.57616e+06	1.23608e+06	1.4855e+06	726315	2.19298e+06	1.26559e+06	6.93657e+06	3.92865e+07	722493	8.55387e+06	642586	2.65755e+06	1.13868e+06	5.51616e+06	8.99011e+06	622563
0.848_214.1723		C16 H22	214.172	0.848						level5					608438	1.05433e+06	611751	751645	804841	763684	719380	749226	800610	675345	786271	915770	2.46536e+06	1.70464e+06	3.55178e+06	2.6535e+06	1.33182e+06	976467	1.00048e+06	1.02713e+06	1.82975e+06	1.87309e+06	1.3411e+07	1.24493e+06	2.97758e+06	2.99138e+06
0.848_258.0676	Northienamycin	C10 H14 N2 O4 S	258.068	0.848	C17369	S116957				level4					69748.8	72237.3	84358.2	88932.7	76328	76980	78685.6	77412.6	78311.7	75706.6	78583.9	153941	3.05965e+06	179967	190854	157379	197821	173328	113339	182580	199171	173560	172936	206770	165240	157684
0.848_330.1827	Ti0889000	C20 H26 O4	330.183	0.848	C14529	S6519				level4				NULL	1.83177e+06	2.13154e+06	1.60681e+06	1.69655e+06	1.7291e+06	1.57747e+06	2.17392e+06	1.44706e+06	2.02958e+06	1.48027e+06	2.11855e+06	4.88325e+06	1.58609e+06	1.67426e+06	2.65142e+06	2.37614e+06	942396	855864	993408	1.00588e+06	950077	8.06196e+06	7.70391e+06	8.82403e+06	1.55649e+06	7.9278e+06
0.848_417.2878		C19 H40 N5 O3 P	417.288	0.848						level5					4.6413e+06	4.36863e+06	5.7511e+06	5.61955e+06	5.40787e+06	4.89591e+06	5.28635e+06	4.51908e+06	5.43425e+06	4.43508e+06	5.89999e+06	5.88958e+06	1.13165e+07	1.92389e+07	2.26372e+07	2.01238e+07	1.24386e+07	9.6393e+06	8.06477e+06	1.32608e+07	6.76595e+06	8.43096e+06	1.30335e+07	7.16404e+06	9.04326e+06	1.07944e+07
0.848_473.2263		C26 H37 N O3 P2	473.226	0.848						level5					1.35404e+06	1.49834e+06	1.65582e+06	1.64671e+06	1.30891e+06	1.62417e+06	1.44412e+06	1.29103e+06	1.48379e+06	1.77523e+06	1.42874e+06	3.07274e+06	4.45226e+06	2.55846e+06	2.94994e+06	7.07849e+06	2.08024e+06	4.27122e+06	1.0869e+06	2.08162e+06	2.47994e+06	5.59748e+06	2.98394e+07	1.9137e+06	2.50682e+06	2.86157e+06
0.849_137.0479	4-aminobenzoate	C7 H7 N O2	137.048	0.849	C00568	BGI114	HMDB0001392	87.1	80.9	level1	Benzenoids	Benzene and substituted derivatives	Benzoic acids and derivatives	map00790 Folate biosynthesis; map01100 Metabolic pathways;	2.62244e+06	2.62244e+06	2.62244e+06	2.62244e+06	2.62244e+06	2.62244e+06	2.62244e+06	2.62244e+06	2.62244e+06	2.62244e+06	2.62244e+06	2.98506e+07	4.88222e+06	1.00806e+07	1.01132e+07	6.67944e+06	1.69871e+06	214001	211829	705724	501886	8.21186e+06	7.64399e+06	1.51833e+06	798144	3.07894e+06
0.849_162.1045	Valerophenone	C11 H14 O	162.105	0.849		S59482	HMDB0031208			level4	Organic oxygen compounds	Organooxygen compounds	Carbonyl compounds		1.14328e+07	1.03401e+07	9.85431e+06	1.10809e+07	1.04651e+07	1.20661e+07	1.05905e+07	1.08551e+07	1.12642e+07	1.02612e+07	1.04952e+07	3.53842e+07	1.34575e+07	1.70463e+07	1.67605e+07	1.77681e+07	8.59453e+06	1.99876e+07	7.81599e+06	7.78911e+06	1.58884e+07	5.06216e+07	5.89922e+07	4.62656e+07	1.89002e+07	4.19419e+07
0.849_383.2306	Tandospirone	C21 H29 N5 O2	383.231	0.849		S82421				level4					2.32644e+06	2.24459e+06	2.36879e+06	2.47965e+06	2.21506e+06	2.32286e+06	2.32564e+06	2.31292e+06	2.41758e+06	2.21257e+06	2.3615e+06	5.60291e+06	3.18445e+06	2.65861e+06	2.67092e+06	5.4357e+06	874906	1.23886e+06	786108	720680	830141	1.26912e+07	1.31478e+07	1.16741e+07	862593	5.80679e+06
0.85_357.23	Oxybutynin	C22 H31 N O3	357.23	0.85	C07360	S4473	HMDB0015195			level4	Benzenoids	Benzene and substituted derivatives	null	NULL	235838	391082	251010	362730	312250	299081	295886	294531	330979	263975	326885	157370	132796	153467	220074	161601	1.26227e+06	5.45512e+06	347018	1.21548e+06	446406	1.63103e+06	709907	169934	2.04452e+06	154441
0.85_407.2308		C18 H39 N3 O P2 S	407.231	0.85						level5					567577	855942	661754	499418	626465	810750	677114	592915	722196	608475	629288	1.85074e+06	370730	561512	501341	522376	527474	455071	332545	639175	588222	5.17815e+06	7.12292e+06	3.99634e+06	515370	2.52462e+06
0.851_152.1203	(+/-)-camphor	C10 H16 O	152.12	0.851	C00809	S2441				level4	Terpenoids	Monoterpenoids (C10)	Cyclic monoterpenes	map04750 Inflammatory mediator regulation of TRP channels;	2.88582e+06	2.46235e+06	2.62003e+06	3.00033e+06	2.5928e+06	2.72637e+06	2.72548e+06	2.78711e+06	2.31038e+06	2.79681e+06	2.95385e+06	4.52989e+06	6.14842e+06	7.62998e+06	5.45964e+06	7.12243e+06	4.11992e+06	2.84903e+06	3.4654e+06	3.49428e+06	5.1763e+06	6.30479e+06	1.1894e+07	1.39358e+07	4.57265e+06	6.58886e+06
0.851_208.1102	Asarone	C12 H16 O3	208.11	0.851	C17846	S552532	HMDB0031469			level4	Benzenoids	Phenol ethers	Anisoles	NULL	1.85596e+06	2.06196e+06	1.79812e+06	1.76455e+06	1.90531e+06	1.96222e+06	1.84595e+06	2.0407e+06	1.90467e+06	1.83664e+06	1.79375e+06	5.7394e+06	2.54902e+06	3.25655e+06	3.11023e+06	3.0874e+06	3.66971e+06	2.80598e+06	2.09961e+06	3.36655e+06	3.60117e+06	1.04879e+07	1.21411e+07	1.11005e+07	3.04014e+06	7.46005e+06
0.851_405.2878	(+)-cassaine	C24 H39 N O4	405.288	0.851	C08670	S4444673				level4	Alkaloids	Alkaloids derived by amination reactions	Terpenoid alkaloids	NULL	4.27102e+06	4.27102e+06	4.27102e+06	4.27102e+06	4.27102e+06	4.27102e+06	4.27102e+06	4.27102e+06	4.27102e+06	4.27102e+06	4.27102e+06	1.21327e+07	3.16393e+06	2.72588e+06	9.11107e+07	2.08134e+06	4.26478e+06	1.37028e+07	7.19684e+06	2.69021e+06	1.13934e+07	1.06822e+07	6.71908e+07	3.92799e+06	1.8961e+07	5.12618e+06
0.851_427.3307		C24 H45 N O5	427.331	0.851						level5					2.43391e+06	2.05428e+06	2.23121e+06	2.06478e+06	2.09411e+06	2.64073e+06	2.27673e+06	1.87215e+06	2.36694e+06	2.12904e+06	2.36064e+06	4.86401e+06	4.79798e+06	8.40829e+06	7.99643e+06	9.44042e+06	5.11674e+06	5.73187e+06	2.55633e+06	3.84566e+06	2.72086e+06	1.25673e+07	1.67669e+07	3.31876e+06	5.29258e+06	5.01507e+06
0.851_80.0626		C6 H8	80.0626	0.851						level5					4.66363e+06	3.93494e+06	4.70446e+06	4.62983e+06	4.12073e+06	4.69373e+06	4.0284e+06	5.14961e+06	5.11026e+06	3.56601e+06	4.32908e+06	9.60554e+06	9.55594e+06	8.87143e+06	1.07293e+07	7.96745e+06	6.03558e+06	8.51934e+06	3.99125e+06	6.60216e+06	1.10288e+07	1.00504e+07	2.62359e+07	1.56015e+07	1.19863e+07	1.03892e+07
0.852_293.2354		C12 H32 N5 O P	293.235	0.852						level5					1.60162e+07	1.73234e+07	2.09265e+07	1.68465e+07	1.72396e+07	1.73676e+07	1.74173e+07	1.79148e+07	2.03132e+07	1.57605e+07	1.68435e+07	4.87166e+07	2.96685e+07	2.73773e+07	2.03271e+07	2.00552e+07	2.04231e+07	2.59138e+07	1.26283e+07	1.5973e+07	2.58904e+07	6.44269e+07	8.17019e+07	7.96155e+07	4.43241e+07	5.8893e+07
0.852_312.184	Praziquantel	C19 H24 N2 O2	312.184	0.852	C07367	S4722	HMDB0015191			level4	Organoheterocyclic compounds	Tetrahydroisoquinolines	null	NULL	119610	128118	156554	94748.2	155577	101275	133143	128804	109080	126847	143159	986837	876367	3.6249e+06	145689	264292	110223	96438.5	58783	104233	91698.4	892765	353825	104378	81682.6	123249
0.852_317.1989	(+/-)-tetrabenazine	C19 H27 N O3	317.199	0.852	C11168	S5796	HMDB0015592			level4	Organoheterocyclic compounds	Tetrahydroisoquinolines	null	NULL	1.5967e+06	1.20715e+06	1.35983e+06	1.09657e+06	1.97659e+06	1.52625e+06	1.321e+06	1.36617e+06	1.40012e+06	1.54396e+06	1.37607e+06	916948	1.41018e+06	1.12002e+06	1.09379e+06	2.15727e+06	6.16225e+06	1.14803e+07	619053	5.60255e+06	1.38006e+06	1.31039e+06	1.1894e+06	1.04763e+06	3.91996e+06	2.18202e+06
0.852_340.2612	15(s)-hpede	C20 H36 O4	340.261	0.852		S4445996				level4					1.01683e+07	1.16849e+07	1.35001e+07	1.00197e+07	1.14776e+07	1.17245e+07	1.12783e+07	9.74952e+06	1.24948e+07	1.23297e+07	1.06656e+07	1.12021e+07	2.27218e+07	3.80035e+07	4.5748e+07	3.42258e+07	3.19253e+07	2.80928e+07	1.54569e+07	2.50444e+07	3.0423e+07	5.52168e+07	6.03872e+07	2.17175e+07	4.11756e+07	2.73422e+07
0.852_429.2879	Adaprolol	C26 H39 N O4	429.288	0.852		S54735				level4					2.18517e+06	1.6514e+06	3.67916e+06	2.26263e+06	2.12393e+06	2.2968e+06	2.26053e+06	2.1168e+06	2.70138e+06	2.11193e+06	2.26747e+06	2.68402e+06	3.2315e+06	7.06102e+06	7.82874e+06	1.47827e+07	4.21273e+06	4.31002e+06	6.13655e+06	5.41879e+06	5.47939e+06	1.15591e+07	1.93552e+07	3.18838e+06	8.10688e+06	3.14667e+06
0.853_155.1311	To0127900	C9 H17 N O	155.131	0.853		S12665	HMDB0031179			level4	Organoheterocyclic compounds	Piperidines	Piperidinones		3.03683e+06	2.15783e+06	2.80731e+06	2.865e+06	2.96327e+06	2.55514e+06	2.79515e+06	3.02027e+06	2.52626e+06	2.72163e+06	2.70169e+06	1.16881e+07	6.73652e+06	5.12237e+06	4.97999e+06	5.15975e+06	6.64516e+06	1.08274e+07	3.5024e+06	4.23409e+06	4.03986e+06	3.16756e+06	4.53441e+06	8.20363e+06	5.06047e+06	5.12942e+06
0.853_210.1258	Epi-jasmonic acid	C12 H18 O3	210.126	0.853	C16317	S5584839				level4	FA Fatty acyls	FA02 Octadecanoids	FA0202 jasmonic acids	map00592 alpha-Linolenic acid metabolism; map01100 Metabolic pathways;	2.92886e+06	3.15242e+06	2.74766e+06	2.40928e+06	3.05339e+06	3.29088e+06	3.39037e+06	2.84766e+06	2.21586e+06	2.84822e+06	3.48681e+06	8.56754e+06	5.25167e+06	4.69193e+06	4.50404e+06	3.43828e+06	3.73562e+06	4.02194e+06	1.79645e+06	2.52588e+06	3.2642e+06	1.01319e+07	1.1996e+07	1.36043e+07	3.209e+06	8.96915e+06
0.853_230.0862		C14 H15 O P	230.086	0.853						level5					501094	514405	634256	566789	596070	579602	548911	497066	545309	811692	438283	1.11373e+06	1.14998e+06	1.17713e+06	1.0105e+06	1.02987e+06	1.79911e+06	604810	973653	1.41302e+06	1.19994e+06	778871	1.23033e+06	1.29275e+06	942434	961040
0.853_381.2878	Prostaglandin f2î± dimethyl amide	C22 H39 N O4	381.288	0.853		S4446201				level4					6.89555e+06	5.78184e+06	6.83178e+06	6.27438e+06	6.64613e+06	6.48689e+06	6.45445e+06	6.38287e+06	7.05195e+06	5.85292e+06	6.66706e+06	6.29022e+06	7.51444e+06	1.06098e+07	1.87072e+07	1.13647e+07	1.85347e+07	7.60815e+06	9.1705e+06	1.15477e+07	1.36288e+07	3.39938e+07	6.53897e+07	8.87229e+06	2.46708e+07	1.21458e+07
0.853_415.2719	Salmeterol	C25 H37 N O4	415.272	0.853	C07241	S4968	HMDB0015073			level4	Benzenoids	Benzene and substituted derivatives	Benzyl alcohols	NULL	2.66747e+06	2.05039e+06	2.65592e+06	2.62322e+06	2.68124e+06	2.54918e+06	2.46915e+06	2.36958e+06	3.10926e+06	1.98605e+06	2.74068e+06	3.62595e+06	4.10969e+06	7.84724e+06	1.2386e+07	7.8344e+06	5.10888e+06	5.76879e+06	3.04288e+06	3.87053e+06	4.33709e+06	9.25767e+06	1.77105e+07	4.01437e+06	7.96403e+06	4.90716e+06
0.853_438.3458		C19 H47 N6 O3 P	438.346	0.853						level5					515061	381595	535619	523594	439209	408023	397629	636024	593075	710892	218050	131684	1.5111e+06	2.03814e+06	2.18044e+06	2.41475e+06	2.04277e+06	3.49612e+06	1.2463e+06	1.23956e+06	1.16159e+06	713174	1.71789e+06	401968	972751	725964
0.853_697.4748	Alemcinal	C38 H67 N O10	697.475	0.853		S8093726				level4					132390	135070	155495	161865	137460	143402	142632	137371	135568	169466	133665	316709	246480	315192	346808	310908	357802	304222	204360	318887	355720	340717	682860	361864	298966	282581
0.854_315.1833	Mitiglinide	C19 H25 N O3	315.183	0.854		S108739	HMDB0015382			level4	Phenylpropanoids and polyketides	Phenylpropanoic acids	null		166738	166738	166738	166738	166738	166738	166738	166738	166738	166738	166738	88542.7	74195.3	114414	97336.4	95581	875774	2.43835e+06	337943	779355	287475	318848	777696	107353	974491	156945
0.854_357.2878		C20 H39 N O4	357.288	0.854						level5					9.20243e+06	1.05562e+07	1.23436e+07	9.01147e+06	1.01133e+07	1.07059e+07	1.0128e+07	8.73337e+06	1.13081e+07	1.13135e+07	9.4863e+06	8.58261e+06	2.16042e+07	3.50797e+07	4.16627e+07	3.16015e+07	3.0916e+07	2.74992e+07	1.4679e+07	2.46835e+07	2.98023e+07	5.23336e+07	5.74282e+07	1.81575e+07	3.99873e+07	2.48549e+07
0.854_365.1626	Nequinate	C22 H23 N O4	365.163	0.854		S24579	HMDB0031754			level4	Organoheterocyclic compounds	Quinolines and derivatives	Quinolones and derivatives		1.37922e+07	1.36419e+07	1.34271e+07	1.34204e+07	1.45444e+07	1.37555e+07	1.36568e+07	1.34114e+07	1.48256e+07	1.27511e+07	1.40735e+07	2.22904e+06	1.63012e+06	1.22922e+06	2.71246e+06	1.47211e+06	3.83478e+07	2.11918e+08	5.70373e+07	2.8375e+07	5.50308e+07	1.47908e+06	1.03528e+06	1.87603e+06	2.92707e+07	1.74953e+07
0.854_391.272	N-[(5z,8z,11z,14z)-5,8,11,14-icosatetraenoyl]serine	C23 H37 N O4	391.272	0.854		S4446511				level4					4.8219e+06	4.83347e+06	5.34078e+06	8.21196e+06	5.57429e+06	6.38353e+06	3.66389e+06	7.76016e+06	6.59648e+06	3.92656e+06	6.05091e+06	6.45215e+06	1.08503e+07	3.00028e+07	3.24521e+07	2.02537e+07	8.83471e+06	5.65684e+07	5.032e+06	4.3041e+07	3.53942e+07	1.91026e+07	9.48393e+07	3.95998e+07	5.83887e+07	9.6815e+06
0.854_393.2899		C20 H43 N O4 S	393.29	0.854						level5					3.35988e+06	2.37703e+06	2.9959e+06	3.28033e+06	3.18408e+06	3.08781e+06	2.85183e+06	3.06116e+06	3.66734e+06	2.31617e+06	3.25067e+06	4.78572e+06	4.00717e+06	8.25082e+06	1.40261e+07	8.39299e+06	5.84099e+06	7.76202e+06	3.10188e+06	4.19717e+06	4.46766e+06	9.24709e+06	1.93069e+07	3.98648e+06	8.03089e+06	6.1679e+06
0.854_396.1936	8-[(2z)-3,6-dimethyl-2-hepten-1-yl]-5,7-dihydroxy-2-(4-hydroxyphenyl)-2,3-dihydro-4h-chromen-4-one	C24 H28 O5	396.194	0.854		S35014926	HMDB0040312			level4	Phenylpropanoids and polyketides	Flavonoids	Flavans		2.38826e+07	2.15584e+07	2.08736e+07	2.47548e+07	1.50436e+07	2.78639e+07	2.84787e+07	8.87405e+06	3.01101e+07	2.07642e+07	2.88512e+07	5.48923e+07	2.49123e+07	4.69369e+07	6.93518e+07	5.95248e+07	6.17096e+07	4.81354e+07	5.56275e+07	8.08584e+07	7.85351e+07	4.75295e+07	3.75242e+07	2.77827e+07	5.81294e+07	4.31764e+07
0.855_225.1729		C13 H23 N O2	225.173	0.855						level5					1.83347e+07	1.36825e+07	1.7705e+07	1.24001e+07	1.61701e+07	1.30606e+07	1.63857e+07	1.23831e+07	1.84839e+07	1.62855e+07	1.45207e+07	1.90026e+07	2.26366e+07	2.08874e+07	1.7044e+07	2.06981e+07	2.21714e+07	1.71152e+07	7.29137e+06	2.72446e+07	7.42307e+06	1.43544e+07	1.01897e+07	7.47735e+06	1.03205e+07	2.71204e+07
0.855_287.2477		C15 H34 N3 P	287.248	0.855						level5					292155	205775	338514	372916	211867	276521	277932	268890	288848	282944	264762	361103	1.4228e+07	864834	552361	2.65896e+06	794747	790903	71355.9	1.00868e+06	2.82608e+06	2.52651e+06	469902	1.78906e+06	90925.3	256014
0.855_303.1834		C18 H25 N O3	303.183	0.855						level5					359347	349335	370400	393656	414402	372530	387918	317092	470568	400605	321774	77563.9	403736	103828	97432.2	91583.2	2.15007e+06	2.89243e+06	188094	2.92738e+06	437743	258760	101005	140987	1.52748e+06	193441
0.855_340.2036	Norethisterone acetate	C22 H28 O3	340.204	0.855	C08152	S5627				level4				NULL	3.5247e+06	5.11349e+06	4.89853e+06	6.88413e+06	6.24799e+06	4.84033e+06	5.71179e+06	4.77311e+06	6.12245e+06	4.44242e+06	4.9978e+06	2.09659e+07	2.63274e+06	3.85176e+06	3.25724e+06	2.61586e+06	3.83962e+06	1.17034e+07	4.64133e+06	3.2418e+06	5.1617e+06	3.69416e+07	3.50401e+07	3.96174e+07	7.01138e+06	2.20037e+07
0.855_409.2488		C23 H31 N5 O2	409.249	0.855						level5					3.23271e+09	2.69857e+09	8.36844e+08	3.53696e+09	3.1565e+09	3.31958e+09	3.1201e+09	1.74455e+09	2.85183e+09	2.30605e+09	2.66325e+09	7.51583e+09	4.36669e+09	7.223e+09	7.77659e+09	6.36468e+09	8.08242e+09	6.58235e+09	5.0702e+09	5.98037e+09	7.72195e+09	6.14081e+09	4.34525e+09	5.64821e+09	6.16936e+09	5.65833e+09
0.855_432.2341	Buclizine	C28 H33 Cl N2	432.234	0.855	C07777	S6473	HMDB0014498			level4	Benzenoids	Benzene and substituted derivatives	Diphenylmethanes	NULL	7.6358e+08	1.88486e+08	7.33161e+08	7.76241e+08	6.94525e+08	6.71223e+08	6.18117e+08	5.3508e+08	5.92487e+08	5.35828e+08	5.55339e+08	1.79691e+09	8.94295e+08	1.56886e+09	1.49804e+09	4.29252e+08	1.64072e+09	1.33358e+09	1.03806e+09	1.26e+09	1.59803e+09	1.26443e+09	8.75634e+08	1.33126e+09	1.26088e+09	1.17435e+09
0.855_600.5118		C40 H64 N4	600.512	0.855						level5					125215	125215	125215	125215	125215	125215	125215	125215	125215	125215	125215	101216	2.03378e+06	215120	124890	159282	463361	339682	89820.4	631179	2.86563e+06	2.56062e+06	1.5447e+06	465407	1.48556e+06	203201
0.856_120.094	Cumene	C9 H12	120.094	0.856	C14396	S7128	HMDB0034029			level4	Benzenoids	Benzene and substituted derivatives	Cumenes	NULL	3.0696e+06	2.93401e+06	2.384e+06	2.65852e+06	2.94104e+06	2.85416e+06	3.03977e+06	2.96389e+06	2.66357e+06	2.52435e+06	2.9968e+06	7.33654e+06	8.69632e+06	6.99546e+06	7.44594e+06	7.07622e+06	4.4735e+06	5.15171e+06	1.45274e+06	3.92621e+06	1.07555e+06	1.27163e+07	1.35088e+07	1.17141e+07	4.26215e+06	6.62112e+06
0.856_310.2143	13(s)-hpotre	C18 H30 O4	310.214	0.856	C04785	S4593698			32.8	level4	FA Fatty acyls	FA01 Fatty Acids and Conjugates	FA0104 Hydroperoxy fatty acids	map00592 alpha-Linolenic acid metabolism; map01100 Metabolic pathways;	9.98356e+06	9.2863e+06	9.74863e+06	8.07846e+06	8.38241e+06	9.34126e+06	9.35832e+06	8.50466e+06	1.25042e+07	6.75511e+06	9.57808e+06	1.50598e+07	1.06777e+07	9.58907e+06	6.48598e+06	7.28755e+06	9.41746e+06	6.09885e+06	4.43443e+06	9.51026e+06	6.14682e+06	4.40868e+07	1.50374e+07	4.67641e+07	5.91697e+06	2.74665e+07
0.856_323.1518	Dimefline	C20 H21 N O3	323.152	0.856		S2969				level4					115564	65402.9	65570.3	123531	56984.8	113127	92525.9	67728.8	91727.5	78773.9	89411.2	115758	88022.9	129144	124899	110341	119887	794181	482110	166072	514523	126045	133798	141269	428273	99453.5
0.856_364.1886	4beta-phorbol	C20 H28 O6	364.189	0.856	C09155	S390610				level4	Terpenoids	Diterpenoids (C20)	Tiglianes	map04750 Inflammatory mediator regulation of TRP channels;	1.42888e+06	1.36904e+06	1.18274e+06	1.50179e+06	1.29086e+06	1.35798e+06	1.37994e+06	1.29199e+06	1.50494e+06	1.13967e+06	1.48634e+06	3.50955e+06	4.9569e+06	3.00014e+06	3.77047e+06	4.41395e+06	692215	1.55199e+06	1.14488e+06	954941	619626	7.60639e+06	1.36296e+07	1.06197e+07	1.82844e+06	4.27523e+06
0.857_192.1153	Ibufenac	C12 H16 O2	192.115	0.857		S14516				level4					706077	667151	1.09971e+06	538389	785698	736337	741125	752121	722435	687632	792558	1.59781e+06	1.50265e+06	1.55147e+06	550551	413607	359167	1.05244e+06	338779	762943	642271	3.4703e+06	3.49852e+06	4.74878e+06	1.05201e+06	1.37913e+06
0.857_345.1786		C16 H27 N O7	345.179	0.857						level5					3.01042e+06	2.95003e+06	2.98281e+06	3.10327e+06	2.96973e+06	3.0861e+06	3.04369e+06	2.71796e+06	3.38702e+06	2.79836e+06	3.10543e+06	4.85448e+06	9.16101e+06	1.70899e+07	1.35032e+07	1.94663e+07	2.90417e+06	3.75221e+06	1.71557e+06	2.03706e+06	2.75586e+06	1.11254e+06	9.83422e+06	7.60909e+06	2.4185e+06	8.03881e+06
0.857_397.1523	(+)-aureothin	C22 H23 N O6	397.152	0.857	C15689	S5029106				level4				NULL	2.71384e+06	2.71384e+06	2.71384e+06	2.71384e+06	2.71384e+06	2.71384e+06	2.71384e+06	2.71384e+06	2.71384e+06	2.71384e+06	2.71384e+06	82997	200726	54219.9	125757	50755.3	6.16586e+06	5.25884e+07	1.56893e+07	4.80819e+06	1.70283e+07	54638.4	146004	157317	1.04641e+07	2.8693e+06
0.858_108.0576	P-cresol	C7 H8 O	108.058	0.858	C01468	S13839082	HMDB0001858			level4	Benzenoids	Phenols	Cresols	map01100 Metabolic pathways; map04974 Protein digestion and absorption;	1.53441e+06	1.05507e+06	1.47757e+06	1.57666e+06	1.66152e+06	1.76589e+06	1.15337e+06	1.30024e+06	1.72635e+06	1.52108e+06	1.36239e+06	2.54322e+06	5.11967e+06	3.90464e+06	4.20871e+06	5.01557e+06	1.34633e+06	1.62297e+06	358450	1.30873e+06	1.0399e+06	5.3317e+06	8.06342e+06	3.9186e+06	1.74765e+06	4.02375e+06
0.858_276.2088	(e)-parinaric acid	C18 H28 O2	276.209	0.858		S4445965				level4					1.28177e+07	1.43256e+07	1.75509e+07	1.40186e+07	1.35744e+07	1.33074e+07	1.41136e+07	1.45488e+07	2.01973e+07	1.09925e+07	1.33586e+07	4.00804e+07	2.27868e+07	2.38137e+07	1.48097e+07	1.50307e+07	1.63642e+07	1.88098e+07	1.05385e+07	1.73938e+07	1.80811e+07	6.06849e+07	6.89988e+07	7.15604e+07	3.45531e+07	4.6489e+07
0.858_367.2721	3, 5-tetradecadiencarnitine	C21 H37 N O4	367.272	0.858		S30776713	HMDB0013331			level4	null	null	null		5.67537e+06	4.92738e+06	5.79914e+06	5.30995e+06	6.25535e+06	5.57925e+06	5.54769e+06	5.00608e+06	6.43028e+06	5.16809e+06	5.65842e+06	1.02026e+07	8.09314e+06	1.63503e+07	1.76866e+07	1.27174e+07	1.56268e+07	9.50178e+06	7.53776e+06	8.67732e+06	1.18384e+07	2.35229e+07	4.50543e+07	9.3669e+06	2.15725e+07	1.27277e+07
0.858_457.2315		C23 H31 N5 O5	457.231	0.858						level5					587641	1.03453e+06	707719	1.05292e+06	780597	899702	719595	673416	825410	1.17138e+06	669341	1.4313e+06	1.29959e+06	2.52615e+06	1.72937e+06	3.09402e+06	1.88514e+06	1.62861e+06	948316	1.7478e+06	1.58619e+06	5.64029e+06	2.71922e+07	4.51255e+06	1.82513e+06	2.4204e+06
0.859_247.1208	Fagaramide	C14 H17 N O3	247.121	0.859	C10455	S4445085				level4				NULL	378231	378231	378231	378231	378231	378231	378231	378231	378231	378231	378231	36356.8	74501.5	67965.1	129836	167008	1.01688e+06	292285	176685	445826	252693	181784	160861	21042.1	2.06007e+06	616707
0.859_308.1986	5-o-methyl embelin	C18 H28 O4	308.199	0.859	C10373	S149914	HMDB0040867		41.9	level4	Organic oxygen compounds	Organooxygen compounds	Carbonyl compounds	NULL	3.20786e+06	2.69853e+06	3.16205e+06	2.88534e+06	2.63388e+06	3.12766e+06	3.60825e+06	2.95432e+06	2.46577e+06	3.82334e+06	2.47076e+06	7.9352e+06	3.43917e+06	3.03389e+06	2.64593e+06	1.88683e+06	2.64256e+06	3.74962e+06	1.60822e+06	2.92715e+06	3.65532e+06	1.33486e+07	1.34749e+07	1.04192e+07	3.59637e+06	9.56535e+06
0.859_314.1266		C17 H18 N2 O4	314.127	0.859						level5					518684	624979	480915	545831	556851	543830	542426	542311	553777	531035	547086	153301	1.0599e+06	688626	1.54646e+06	1.15984e+06	4.82095e+06	337129	345083	1.17495e+06	708457	4.09192e+06	3.2752e+06	284000	4.15364e+06	832807
0.859_366.2879		C21 H38 N2 O3	366.288	0.859						level5					4.52967e+06	3.83849e+06	4.16088e+06	3.59126e+06	4.86649e+06	4.27876e+06	4.11199e+06	3.97739e+06	3.82365e+06	5.4579e+06	3.64404e+06	4.60533e+06	5.18626e+06	3.76699e+06	1.94486e+07	9.79481e+06	1.77521e+07	6.38394e+06	4.50125e+06	1.34087e+07	7.89062e+06	6.7248e+06	1.47396e+07	3.72094e+06	1.07942e+07	7.2862e+06
0.859_399.1469		C25 H21 N O4	399.147	0.859						level5					9.37486e+06	9.83389e+06	1.05689e+07	1.00607e+07	1.05583e+07	1.02596e+07	9.93208e+06	9.15578e+06	1.12906e+07	1.07626e+07	9.11756e+06	78923	986697	97055.7	300993	79753.8	2.9346e+07	1.90597e+08	5.35056e+07	1.96285e+07	4.76613e+07	93825.8	94819	687624	2.23765e+07	1.23123e+07
0.86_152.0838	2128	C9 H12 O2	152.084	0.86		S56163	HMDB0041326			level4	Benzenoids	Benzene and substituted derivatives	Benzylethers		4.57362e+07	4.57362e+07	4.57362e+07	4.57362e+07	4.57362e+07	4.57362e+07	4.57362e+07	4.57362e+07	4.57362e+07	4.57362e+07	4.57362e+07	1.25031e+08	8.57346e+07	1.07544e+08	8.69586e+07	9.25225e+07	6.96229e+07	1.22705e+08	1.51843e+08	1.06615e+08	1.44935e+08	9.68249e+07	4.79599e+07	1.07391e+08	2.17633e+08	7.47567e+07
0.86_315.2772	(8e)-2-amino-8-octadecene-1,3,4-triol	C18 H37 N O3	315.277	0.86		S28590759	HMDB0038057			level4	Organic nitrogen compounds	Organonitrogen compounds	Amines		2.54114e+06	4.01833e+06	2.64038e+06	3.26767e+06	2.69345e+06	3.05499e+06	2.6437e+06	2.57462e+06	3.25078e+06	3.11439e+06	3.11257e+06	1.1529e+07	7.11447e+06	6.5173e+06	4.74429e+06	4.45435e+06	4.61101e+06	8.13902e+06	5.84492e+06	5.60937e+06	7.39479e+06	4.10744e+06	8.47749e+06	1.17527e+07	7.9413e+06	8.82844e+06
0.86_351.147	Zindoxifene	C21 H21 N O4	351.147	0.86	C14745	S59082				level4				NULL	2.21569e+06	1.72391e+06	2.21031e+06	2.09314e+06	2.08561e+06	2.2108e+06	2.11365e+06	1.95501e+06	2.19828e+06	1.87879e+06	2.19591e+06	106541	265837	138817	125283	120985	5.07559e+06	3.0137e+07	8.76486e+06	4.33577e+06	9.08389e+06	133957	129100	283660	4.70549e+06	3.2841e+06
0.861_283.0698		C13 H17 N O2 S2	283.07	0.861						level5					5.17764e+06	5.411e+06	6.14725e+06	6.61073e+06	4.60633e+06	5.44323e+06	7.45231e+06	4.71238e+06	6.73542e+06	5.7388e+06	4.65086e+06	691468	1.59425e+06	522700	1.539e+07	743189	5.79587e+06	1.61404e+07	1.45155e+07	6.55645e+06	2.04001e+07	219217	208002	3.98852e+06	2.59062e+07	2.73491e+06
0.861_408.3351		C24 H44 N2 O3	408.335	0.861						level5					127169	109650	166450	119509	166454	121783	139138	201253	118874	100287	143336	606128	225696	1.03903e+06	72397.8	67910	440654	242889	47344.2	518592	72228.4	84856.8	87989.1	103958	93767.4	280910
0.861_537.2065		C21 H42 N5 O P3 S2	537.207	0.861						level5					143132	143132	143132	143132	143132	143132	143132	143132	143132	143132	143132	1.22694e+06	1.05046e+06	271621	547448	2.37249e+06	116689	1.14111e+06	133897	102341	185244	1.49289e+06	3.00282e+06	195289	174803	111299
0.862_164.1204	Fenipentol	C11 H16 O	164.12	0.862		S3221				level4					8.04808e+06	9.09608e+06	8.1184e+06	8.10119e+06	7.78168e+06	8.0617e+06	7.64518e+06	7.95946e+06	1.03888e+07	7.39183e+06	7.74102e+06	1.82552e+07	1.414e+07	1.77995e+07	1.47348e+07	1.44827e+07	1.21335e+07	1.15737e+07	7.81533e+06	1.09929e+07	9.75363e+06	2.14473e+07	2.60818e+07	2.91125e+07	1.41223e+07	1.91812e+07
0.862_317.1626	Ethyl 3-(benzoyloxy)-8-methyl-8-azabicyclo[3.2.1]octane-2-carboxylate	C18 H23 N O4	317.163	0.862		S2723	HMDB0041860			level4	Benzenoids	Benzene and substituted derivatives	Benzoic acids and derivatives		976479	1.61011e+06	1.0046e+06	790433	1.00236e+06	1.17202e+06	1.04329e+06	970252	1.29717e+06	995882	1.0028e+06	89288.3	292120	121226	116108	101139	1.17459e+06	8.82756e+06	4.84788e+06	1.18936e+06	5.52828e+06	254445	609812	130112	1.52635e+06	1.66359e+06
0.862_356.1987	Methyl (17z)-3,11-dioxopregna-4,17-dien-21-oate	C22 H28 O4	356.199	0.862	C15267	S4510441				level4				NULL	1.52116e+06	1.5353e+06	1.521e+06	1.49656e+06	1.6084e+06	1.53325e+06	1.52221e+06	1.54063e+06	1.50127e+06	1.65116e+06	1.45825e+06	4.78784e+06	496413	443632	383887	348378	403081	717658	602253	439092	644307	8.82977e+06	1.62887e+07	1.24079e+07	642264	7.54757e+06
0.862_363.2046		C14 H30 N5 O4 P	363.205	0.862						level5					225373	262960	176236	196968	264238	222039	220759	215802	261280	199819	217785	422241	266170	287976	370148	516505	227761	232005	99139	191180	154928	2.1592e+06	1.98262e+06	1.21062e+06	147941	730012
0.863_180.1152	3-bha	C11 H16 O2	180.115	0.863		S8145	HMDB0059925			level4	Benzenoids	Phenols	Methoxyphenols		1.12964e+07	7.99794e+06	1.05779e+07	6.71862e+06	1.26642e+07	8.84344e+06	8.83761e+06	1.02804e+07	1.13084e+07	7.97203e+06	9.44771e+06	1.74802e+07	2.03833e+07	4.75489e+07	1.80406e+07	2.15471e+07	1.05558e+07	1.9542e+07	6.70674e+06	7.68472e+06	1.35663e+07	3.24271e+07	4.38897e+07	3.23564e+07	1.18868e+07	2.95414e+07
0.863_303.1469	Fenoterol	C17 H21 N O4	303.147	0.863		S3226	HMDB0015405			level4	Benzenoids	Benzene and substituted derivatives	Phenethylamines		747428	246656	425562	410262	507751	476482	467221	532103	407733	410240	435248	139242	303844	226562	329784	377445	664671	3.15453e+06	1.86747e+06	775003	1.78676e+06	190705	227356	163953	698125	704069
0.863_350.2092	Andrographolide	C20 H30 O5	350.209	0.863	C20214	MReference-6152			79.7	level2	Terpenoids	Diterpenoids (C20)	Labdanes	NULL	2.90692e+07	1.57418e+07	2.77853e+07	1.58611e+07	3.14523e+07	2.51066e+07	2.55243e+07	2.00487e+07	2.46662e+07	2.61501e+07	2.0454e+07	7.21979e+07	3.36442e+07	3.17289e+07	6.56483e+07	5.55603e+07	1.14299e+07	2.43811e+07	7.62443e+06	1.2168e+07	1.31672e+07	8.47196e+07	1.28548e+08	1.12357e+08	1.8943e+07	4.69577e+07
0.863_392.2197	Isodomedin	C22 H32 O6	392.22	0.863	C09115	S390594				level4	Terpenoids	Diterpenoids (C20)	Kaurenes	NULL	4.10722e+06	9.86228e+06	6.73186e+06	4.82019e+06	6.45129e+06	5.96981e+06	4.44986e+06	5.83965e+06	5.61458e+06	8.6142e+06	5.34233e+06	1.42098e+07	8.86334e+06	8.27954e+06	7.17428e+06	1.64176e+07	3.4981e+06	4.8453e+06	2.18313e+06	2.80744e+06	3.18015e+06	3.41189e+07	6.48666e+07	2.95531e+07	7.19866e+06	1.6931e+07
0.863_489.2215		C24 H35 N5 O2 S2	489.221	0.863						level5					351486	359012	405639	465571	359477	387979	411100	340755	381492	430428	374512	827462	680265	922557	829108	2.7739e+06	881584	1.12454e+06	513050	963290	896940	1.09854e+06	1.1304e+07	931822	1.61746e+06	674250
0.864_122.1097	3-allylcyclohexene	C9 H14	122.11	0.864		S123394	HMDB0061784			level4	Hydrocarbons	Unsaturated hydrocarbons	Olefins		6.85715e+06	6.85715e+06	6.85715e+06	6.85715e+06	6.85715e+06	6.85715e+06	6.85715e+06	6.85715e+06	6.85715e+06	6.85715e+06	6.85715e+06	3.31822e+07	2.73596e+07	2.48361e+07	2.17832e+07	2.1911e+07	7.39394e+06	1.0101e+07	3.99396e+06	6.03185e+06	5.8624e+06	2.0431e+07	2.34716e+07	1.7341e+07	9.99778e+06	9.70608e+06
0.864_148.089	Trans-anethole	C10 H12 O	148.089	0.864	C10428	S553166				level4	Phenylpropanoids	Monolignols	Others		3.98699e+06	3.22741e+06	3.41703e+06	3.80377e+06	3.63262e+06	4.36788e+06	3.36807e+06	3.28319e+06	3.24412e+06	3.49408e+06	4.61733e+06	9.70436e+06	5.85981e+06	5.8811e+06	5.22183e+06	6.87786e+06	3.22165e+06	5.68779e+06	3.04429e+06	3.641e+06	4.43892e+06	1.62203e+07	1.73724e+07	1.5731e+07	6.28775e+06	1.33785e+07
0.864_268.1211	2ee5599gqs	C16 H16 N2 O2	268.121	0.864	C19217	S11448				level4				NULL	1.50845e+06	1.23438e+06	1.4228e+06	1.71813e+06	991790	1.0965e+06	1.38285e+06	1.11955e+06	1.35287e+06	2.05713e+06	1.02965e+06	1.79353e+06	2.26273e+06	2.07663e+06	2.67625e+06	2.11971e+06	2.48358e+06	1.86445e+06	437981	1.95411e+06	2.99638e+06	2.38969e+06	1.73004e+06	2.44813e+06	2.32711e+06	1.84043e+06
0.864_291.147	Befunolol	C16 H21 N O4	291.147	0.864		S2219				level4					385097	268236	387409	296188	371486	334849	303978	590671	340050	262655	286379	79310	135138	97387.4	94036.7	85066.1	260244	1.62778e+06	1.9206e+06	112217	2.19248e+06	211788	346114	102417	3.59534e+06	893616
0.864_318.2194	15-deoxy-δ12,14-prostaglandin a1	C20 H30 O3	318.219	0.864		MReference-4724			83.5	level2					4.85091e+07	5.36321e+07	4.92626e+07	5.06033e+07	4.37709e+07	5.15474e+07	5.19352e+07	3.94539e+07	6.53314e+07	4.4045e+07	4.96514e+07	2.27743e+07	5.27128e+07	5.34054e+07	8.08598e+07	6.98447e+07	4.93665e+07	4.86955e+07	4.70194e+07	4.22798e+07	5.56373e+07	1.89268e+08	1.71509e+08	1.96472e+08	8.37211e+07	1.80534e+08
0.864_319.1418	Proquinolate	C17 H21 N O5	319.142	0.864		S14791				level4					1.61509e+06	1.60588e+06	1.47803e+06	1.60276e+06	1.77851e+06	1.63008e+06	1.66283e+06	1.42227e+06	1.73555e+06	1.56885e+06	1.68027e+06	75054.2	566564	84695.2	73259.7	74707.1	5.28103e+06	1.46473e+07	1.35299e+07	6.10087e+06	1.13027e+07	76369.3	88792.6	1.00239e+06	4.64706e+06	2.21531e+06
0.864_409.2827		C23 H39 N O5	409.283	0.864						level5					8.53054e+06	8.53054e+06	8.53054e+06	8.53054e+06	8.53054e+06	8.53054e+06	8.53054e+06	8.53054e+06	8.53054e+06	8.53054e+06	8.53054e+06	2.05478e+07	9.42041e+07	4.09413e+07	2.6644e+07	2.26327e+07	9.03054e+06	1.32876e+08	8.24844e+06	5.46877e+07	4.74295e+07	1.11439e+08	1.04037e+08	1.13361e+08	7.84662e+07	1.3625e+07
0.865_166.136	Dihydrojasmone	C11 H18 O	166.136	0.865		S56166	HMDB0031565			level4	Organic oxygen compounds	Organooxygen compounds	Carbonyl compounds		3.07998e+06	2.84517e+06	3.02144e+06	3.14229e+06	2.64681e+06	2.93864e+06	2.78391e+06	2.94188e+06	2.58496e+06	2.70952e+06	3.67147e+06	5.83408e+06	805795	3.27901e+06	2.5531e+06	2.68543e+06	3.5217e+06	1.05865e+06	2.51425e+06	3.10423e+06	2.96248e+06	1.35471e+07	9.42586e+06	1.4428e+07	3.24473e+06	8.11715e+06
0.865_251.1885	(-)-nupharamine	C15 H25 N O2	251.189	0.865	C17464	S9087243				level4				NULL	768786	749416	1.54892e+06	825127	959517	938438	774096	1.09063e+06	1.08784e+06	725726	945201	3.39335e+06	2.54989e+06	3.79624e+06	532897	755232	3.57822e+06	2.51393e+06	830185	3.01864e+06	941101	1.10301e+06	875670	1.00097e+06	2.47165e+06	756229
0.865_288.1143	R-soterenol	C12 H20 N2 O4 S	288.114	0.865	C11769	S391626				level4				NULL	1.09017e+06	1.06075e+06	1.20024e+06	1.14548e+06	1.32218e+06	1.09364e+06	1.47095e+06	1.10547e+06	1.27533e+06	896731	1.27404e+06	485160	3.41295e+06	835908	1.16292e+06	1.6072e+06	2.22509e+06	3.81601e+06	3.01774e+06	9.3112e+06	3.78998e+06	3.79607e+06	907091	2.41995e+06	1.40473e+06	976170
0.865_356.2671		C20 H32 N6	356.267	0.865						level5					502462	405103	482077	470271	469961	464758	463954	458581	484570	456142	460213	632849	1.14067e+06	1.34557e+06	2.10889e+06	1.2161e+06	1.57467e+06	1.47215e+06	844199	538391	798687	428284	1.09199e+06	1.27831e+06	1.60984e+06	1.99923e+06
0.865_366.2042	Dibutoxyethylphthalate	C20 H30 O6	366.204	0.865	C15438	S8042				level4				NULL	5.27004e+06	5.9095e+06	5.20893e+06	5.05368e+06	4.60482e+06	4.78614e+06	5.67818e+06	4.4677e+06	5.55107e+06	5.02921e+06	5.54219e+06	1.20743e+07	1.00403e+07	7.41705e+06	1.12482e+07	1.08522e+07	4.36694e+06	5.17912e+06	4.30199e+06	2.61295e+06	3.18551e+06	2.4746e+07	3.30112e+07	2.58547e+07	5.11135e+06	1.64803e+07
0.865_384.2663	Estradiol enanthate	C25 H36 O3	384.266	0.865		S19815				level4					1.37102e+06	1.3468e+06	1.36785e+06	1.30494e+06	1.50696e+06	1.17111e+06	1.65618e+06	1.41151e+06	1.76834e+06	1.31902e+06	1.02867e+06	320584	1.61512e+06	1.00418e+06	1.84145e+06	1.26621e+06	1.38796e+07	408833	5.44709e+06	1.42645e+07	1.84957e+07	921924	456416	1.16574e+06	719327	1.0289e+06
0.865_415.2195		C16 H38 Cl N5 O S2	415.219	0.865						level5					184012	190577	222555	234623	201370	203090	207590	204231	206603	199730	207321	406130	482281	474792	503514	415201	521893	457276	299012	481685	525457	457889	6.64969e+06	545504	435937	416004
0.866_133.0529	5-indolol	C8 H7 N O	133.053	0.866		S15244	HMDB0059805			level4	Organoheterocyclic compounds	Indoles and derivatives	Hydroxyindoles		306203	357362	323561	409979	417300	317245	345284	367974	360589	345918	352612	164684	84495.6	123485	136220	124861	2.4637e+06	42612.1	2.99532e+06	3.21738e+06	5.02386e+06	49556.3	56320.5	46987	50647.5	160568
0.866_289.1677	Atropine	C17 H23 N O3	289.168	0.866	C01479	S10194105	HMDB0014712			level4	Alkaloids and derivatives	Tropane alkaloids	null		1.76552e+06	1.94435e+06	1.7431e+06	1.80943e+06	1.82985e+06	1.81745e+06	1.81729e+06	1.81161e+06	1.82806e+06	1.81864e+06	1.81009e+06	1.02049e+06	1.15924e+06	366052	926645	443536	8.97344e+06	9.92322e+06	2.10573e+06	6.34141e+06	2.12552e+06	698423	2.02913e+06	1.70622e+06	8.29432e+06	986277
0.866_338.1881	Resmethrin	C22 H26 O3	338.188	0.866	C10991	S4877				level4				NULL	606852	482607	524994	577377	527293	531810	679854	472318	604704	506387	544243	1.94445e+06	507557	248249	251630	232281	267561	478952	161611	300142	357417	3.27195e+06	6.27422e+06	7.03017e+06	263895	2.91943e+06
0.867_204.1153	(z)-hex-3-enyl benzoate	C13 H16 O2	204.115	0.867		S4519192	HMDB0033379			level4	Benzenoids	Benzene and substituted derivatives	Benzoic acids and derivatives		838649	811250	766488	716345	832365	866063	753156	677481	1.04408e+06	726773	780522	2.19147e+06	1.26679e+06	995270	1.08373e+06	1.32758e+06	727431	1.71228e+06	564367	968586	1.00188e+06	4.47612e+06	6.096e+06	6.55297e+06	1.46506e+06	3.17728e+06
0.867_383.119		C21 H21 N O4 S	383.119	0.867						level5					979369	979369	979369	979369	979369	979369	979369	979369	979369	979369	979369	80076.4	223606	102901	88822.4	84131.4	2.14869e+06	1.61204e+07	5.17152e+06	1.6376e+06	5.16845e+06	95144.4	112103	93019.6	3.41043e+06	1.30414e+06
0.867_412.3302		C24 H40 N6	412.33	0.867						level5					4.70935e+06	4.70935e+06	4.70935e+06	4.70935e+06	4.70935e+06	4.70935e+06	4.70935e+06	4.70935e+06	4.70935e+06	4.70935e+06	4.70935e+06	4.858e+06	2.17606e+07	1.57623e+07	3.89837e+07	1.94972e+07	2.10649e+07	4.29753e+07	1.43471e+07	1.74047e+07	2.83174e+07	1.78276e+07	2.08843e+07	1.25699e+07	3.28398e+07	1.55339e+07
0.868_222.1622	2,6-di-tert-butylhydroquinone	C14 H22 O2	222.162	0.868		S68075	HMDB0040178			level4	Benzenoids	Benzene and substituted derivatives	Phenylpropanes		838326	650320	836693	1.05106e+06	729251	771654	775096	787372	858034	810298	784399	1.82281e+06	1.58713e+06	1.56999e+06	842077	892934	961622	696671	446349	859704	499127	4.72876e+06	2.39093e+06	3.3332e+06	992677	2.25175e+06
0.868_318.1367	[similar to: prostaglandin d1; δmass: -36.1040 da]		318.137	0.868						level5					1.54634e+06	1.63177e+06	1.50503e+06	1.97575e+06	1.68909e+06	2.09759e+06	1.66842e+06	1.38846e+06	2.15508e+06	1.52449e+06	1.666e+06	76298.6	652947	104577	81943.7	75170.1	7.52447e+06	1.93921e+07	5.33586e+06	9.06039e+06	1.2896e+07	94000.4	96552.7	1.65833e+06	1.31386e+07	2.96354e+06
0.868_332.0795		C19 H12 N2 O4	332.079	0.868						level5					188958	211126	228812	141986	225431	196480	207650	170346	177558	222817	209692	104996	237680	172179	328727	160036	629613	3.42182e+06	675170	246798	1.49114e+06	152313	190582	126198	2.0844e+06	344800
0.869_138.1045	Isophorone	C9 H14 O	138.105	0.869	C14743	S6296	HMDB0031195			level4	Organic oxygen compounds	Organooxygen compounds	Carbonyl compounds	NULL	8.58194e+06	9.08116e+06	1.01724e+07	9.25524e+06	8.87135e+06	9.13362e+06	1.04114e+07	8.64279e+06	1.04264e+07	7.42997e+06	1.00247e+07	1.78037e+07	1.05559e+07	1.05129e+07	1.00123e+07	9.53288e+06	7.16871e+06	7.91132e+06	4.70665e+06	6.55953e+06	6.77386e+06	5.42801e+07	5.15992e+07	5.12818e+07	9.11165e+06	3.03561e+07
0.869_215.1887	907502	C12 H25 N O2	215.189	0.869		S62862				level4					942149	1.56386e+06	1.48601e+06	1.51522e+06	893638	1.16469e+06	1.16792e+06	1.11215e+06	1.16868e+06	1.04035e+06	1.72192e+06	1.92816e+06	1.87528e+06	2.76853e+06	1.03208e+06	1.24284e+06	3.20942e+06	1.17525e+06	2.55672e+06	2.19315e+06	2.63319e+06	632536	1.03766e+06	1.20119e+06	1.35464e+06	2.47412e+06
0.869_302.1881	11-ketotestosterone	C19 H26 O3	302.188	0.869	C14256	MReference-6250			45.3	level3				NULL	3.20039e+06	2.66895e+06	2.33425e+06	3.29303e+06	2.59657e+06	2.77255e+06	2.85222e+06	2.71795e+06	2.98608e+06	2.98129e+06	2.53334e+06	7.87973e+06	2.70375e+06	3.84919e+06	3.07579e+06	3.08003e+06	900837	3.5278e+06	1.8522e+06	953361	2.01991e+06	1.52459e+07	1.8872e+07	1.63426e+07	4.34482e+06	1.55932e+07
0.869_303.1104	3-(4,9-dihydrothieno[2,3-c][2]benzothiepin-4-yl)-n,n-dimethyl-1-propanamine	C17 H21 N S2	303.11	0.869		S2337034				level4					177367	159092	208475	149322	173893	175061	174992	163640	187187	163302	176224	69131.1	44632.1	57826.4	74717.7	37220.5	592430	1.45744e+06	1.12195e+06	2.25988e+06	3.75529e+06	55487.7	105207	152096	1.14544e+06	171096
0.869_305.1262	3,4-dihydroxy-7-methoxy-2,2,6-trimethyl-2,3,4,6-tetrahydro-5h-pyrano[3,2-c]quinolin-5-one	C16 H19 N O5	305.126	0.869		S35013415	HMDB0031929			level4	Organoheterocyclic compounds	Quinolines and derivatives	Quinolones and derivatives		1.33884e+06	2.47467e+06	1.06219e+06	1.07975e+06	1.11839e+06	1.41219e+06	1.14582e+06	1.27372e+06	1.59759e+06	1.42108e+06	1.23955e+06	55923.3	331694	81615.5	68252.9	60061.7	4.78707e+06	1.24821e+07	6.43547e+06	4.7686e+06	7.69789e+06	75164.5	77436.4	1.13347e+06	4.32596e+06	1.72687e+06
0.869_327.241	10-nitrooleate	C18 H33 N O4	327.241	0.869		MReference-6748			32.8	level3					1.6647e+06	1.72722e+06	1.53739e+06	1.03505e+06	1.4565e+06	2.23605e+06	1.53781e+06	1.72709e+06	1.74482e+06	984220	1.73923e+06	7.71277e+06	5.30525e+06	4.95592e+06	3.95956e+06	3.58641e+06	2.82387e+06	4.75096e+06	2.23647e+06	4.00977e+06	4.91436e+06	6.87208e+06	1.31369e+07	8.3492e+06	4.38251e+06	6.77058e+06
0.869_385.2464	Buspirone	C21 H31 N5 O2	385.246	0.869	C06861	S2383	HMDB0014633		59.5	level4	Organoheterocyclic compounds	Diazinanes	Piperazines	NULL	1.62853e+07	8.24606e+06	9.33624e+06	1.58966e+07	8.96249e+06	1.53299e+07	1.28217e+07	1.13073e+07	1.20509e+07	1.106e+07	1.09849e+07	3.58332e+07	3.62272e+07	3.93032e+07	4.66314e+07	7.40561e+07	5.251e+06	1.36763e+07	7.53385e+06	4.14084e+06	3.98053e+06	7.37129e+07	1.17579e+08	3.13777e+07	8.64677e+06	1.52419e+07
0.87_313.2406		C21 H31 N O	313.241	0.87						level5					1.68466e+06	1.50317e+06	1.78547e+06	1.53935e+06	1.66899e+06	1.63397e+06	1.63203e+06	1.60827e+06	1.62059e+06	1.7771e+06	1.53525e+06	3.38321e+06	5.55455e+06	5.78535e+06	1.15861e+07	1.08401e+07	4.0722e+06	1.68554e+06	1.38008e+06	2.75217e+06	2.53077e+06	5.18129e+06	5.12769e+06	1.1188e+07	5.65607e+06	7.40988e+06
0.87_325.2252	Bisoprolol	C18 H31 N O4	325.225	0.87	C06852	S2312	HMDB0014750			level4	Benzenoids	Benzene and substituted derivatives	Benzylethers	NULL	1.31566e+06	1.34051e+06	1.33578e+06	1.35845e+06	1.30585e+06	1.4249e+06	1.31981e+06	1.36168e+06	1.42788e+06	1.21243e+06	1.35968e+06	4.06354e+06	1.44858e+06	1.61051e+06	1.37829e+06	1.21894e+06	1.51729e+06	1.74634e+06	914357	1.84607e+06	1.28973e+06	5.58892e+06	5.8324e+06	5.81663e+06	1.68326e+06	4.94636e+06
0.87_380.3036		C22 H40 N2 O3	380.304	0.87						level5					222444	222444	222444	222444	222444	222444	222444	222444	222444	222444	222444	491513	177450	1.25122e+06	75384.2	162168	1.17653e+06	112296	83611.7	1.49947e+06	261431	48267.9	90377.1	124794	107918	284592
0.87_413.2619		C21 H40 N3 O P S	413.262	0.87						level5					1.69921e+06	1.64527e+06	1.51383e+06	1.69611e+06	1.76205e+06	1.89839e+06	1.98746e+06	1.81851e+06	941791	2.25405e+06	1.86414e+06	3.284e+06	3.521e+06	4.72507e+06	1.40602e+07	7.2887e+06	3.23584e+06	2.94811e+06	1.81055e+06	3.12182e+06	2.36727e+06	9.36003e+06	9.74547e+06	4.03965e+06	7.80784e+06	3.07962e+06
0.87_438.1579		C27 H22 N2 O4	438.158	0.87						level5					1.98297e+06	1.98297e+06	1.98297e+06	1.98297e+06	1.98297e+06	1.98297e+06	1.98297e+06	1.98297e+06	1.98297e+06	1.98297e+06	1.98297e+06	66809.1	171356	98274.4	97525.6	71511.3	4.2961e+06	4.20909e+07	1.33185e+07	3.39571e+06	1.26806e+07	88216	118841	88741.1	6.66937e+06	2.8524e+06
0.871_158.1098		C12 H14	158.11	0.871						level5					1.21151e+06	1.50951e+06	1.43301e+06	1.65095e+06	1.08989e+06	1.18261e+06	1.62775e+06	1.41975e+06	1.2717e+06	1.29728e+06	1.37621e+06	2.95759e+06	1.84977e+06	1.52435e+06	1.86725e+06	2.27276e+06	770885	1.78527e+06	472305	792538	1.17617e+06	5.80049e+06	5.78446e+06	7.48046e+06	1.74547e+06	4.849e+06
0.871_244.1462	Fenestrel	C16 H20 O2	244.146	0.871		S22786				level4					626767	590887	1.03302e+06	527819	548070	645614	591180	680171	677356	708518	562484	2.37022e+06	718391	983152	722221	1.50019e+06	351995	1.21211e+06	607426	326425	976985	3.52565e+06	5.10088e+06	3.23981e+06	964253	3.11312e+06
0.871_311.2095	(4s)-4-[(2e,4z)-2,4-decadienoyloxy]-4-(trimethylammonio)butanoate	C17 H29 N O4	311.209	0.871		S30776706				level4					846392	635970	716694	975170	687587	832011	799290	672607	739833	695521	943326	815437	1.80487e+06	1.24985e+06	529145	957160	348654	1.30305e+06	308176	296691	329957	4.09038e+06	2.88831e+06	985414	1.28791e+06	1.48036e+06
0.871_358.2143	Cannabidiolic acid	C22 H30 O4	358.214	0.871	C10784	S141099				level4	PK Polyketides	PK13 Aromatic polyketides	PK1312 Other aromatic polyketides		7.43187e+06	1.10808e+07	8.79651e+06	1.31285e+07	1.22241e+07	9.64615e+06	1.31464e+07	8.61309e+06	1.45161e+07	7.96305e+06	9.65021e+06	4.13754e+07	5.1371e+06	8.21181e+06	6.7072e+06	5.38882e+06	6.66139e+06	1.3968e+07	1.08958e+07	6.13443e+06	1.20112e+07	7.23957e+07	8.04795e+07	1.91315e+07	1.10818e+07	3.94499e+07
0.871_390.2042	Prostratin	C22 H30 O6	390.204	0.871	C20197	S399975				level4	Terpenoids	Diterpenoids (C20)	Tiglianes	NULL	852136	811278	814245	877907	839365	869078	832946	755407	822443	1.06195e+06	742469	1.54109e+06	315083	414027	395552	477067	374030	270313	244508	353053	413079	4.20219e+06	1.01948e+07	9.7548e+06	759879	3.60673e+06
0.871_397.2832	Mfcd03411991	C22 H39 N O5	397.283	0.871		S4446202				level4					1.08896e+06	968471	887689	1.65193e+06	967618	1.09132e+06	1.01608e+06	1.09922e+06	1.21387e+06	1.06977e+06	986915	2.6486e+06	667572	1.14673e+06	1.11178e+06	1.14474e+06	885917	876819	1.22996e+06	671403	1.16879e+06	4.73232e+06	7.75224e+06	4.52627e+06	1.19842e+06	4.7961e+06
0.871_409.2286		C22 H37 N O2 P2	409.229	0.871						level5					521704	521704	521704	521704	521704	521704	521704	521704	521704	521704	521704	1.08649e+06	992279	1.46473e+06	4.50699e+06	2.06715e+06	806890	692551	429713	469136	430073	721128	1.86604e+06	682752	1.20867e+06	1.14041e+06
0.871_411.2443		C16 H38 N5 O3 P S	411.244	0.871						level5					6.92421e+06	6.92421e+06	6.92421e+06	6.92421e+06	6.92421e+06	6.92421e+06	6.92421e+06	6.92421e+06	6.92421e+06	6.92421e+06	6.92421e+06	1.30257e+07	1.04774e+07	1.82242e+07	5.29961e+07	2.38949e+07	9.93824e+06	7.81849e+06	6.3026e+06	7.72632e+06	7.1174e+06	2.0586e+07	4.42918e+07	1.33004e+07	2.96938e+07	1.29923e+07
0.871_890.5783		C56 H78 N2 O7	890.578	0.871						level5					359155	424638	366564	412270	423512	396443	425249	316370	371199	468757	410790	107445	2.42019e+06	1.30336e+06	1.3182e+06	2.06558e+06	1.76249e+06	510694	80382.7	1.42483e+06	1.01891e+06	6.62137e+06	2.45661e+06	265949	3.75395e+06	501406
0.872_323.1156	Rutacridone epoxide	C19 H17 N O4	323.116	0.872	C10739	S4445146	HMDB0033853			level4	Organoheterocyclic compounds	Quinolines and derivatives	Benzoquinolines	NULL	310336	453981	257175	297882	294253	320755	322855	393741	252284	308524	343754	81604.6	87600.3	66515.7	32200.2	44352.8	207187	5.15996e+06	605004	344336	879921	73193.5	36341.5	73078	383010	166809
0.872_335.2478		C17 H37 N O3 S	335.248	0.872						level5					2.35156e+06	2.73676e+06	2.67417e+06	2.65086e+06	2.97609e+06	2.56729e+06	2.90161e+06	2.49923e+06	3.15367e+06	2.54526e+06	2.40121e+06	7.62452e+06	3.46776e+06	2.93591e+06	3.12279e+06	1.94076e+06	3.49554e+06	6.65426e+06	2.6094e+06	4.10879e+06	3.98351e+06	1.05722e+07	1.03243e+07	1.10873e+07	6.40228e+06	7.93897e+06
0.872_371.1158	Baricitinib	C16 H17 N7 O2 S	371.116	0.872		S26373084				level4					45628.9	61581.6	57941	64849.9	100627	68011.6	54752.1	71120.4	59880.1	55459.5	70006.9	112681	85409.9	131170	130744	116203	126982	105573	89103.5	141914	493090	134964	148348	108527	494958	114332
0.872_387.2442		C20 H37 N O4 S	387.244	0.872						level5					7.76941e+06	8.83702e+06	8.5755e+06	8.72347e+06	1.15754e+07	9.07577e+06	8.66206e+06	8.33552e+06	9.9885e+06	8.84129e+06	8.67593e+06	1.35713e+07	1.51604e+07	1.97519e+07	3.54113e+07	2.79587e+07	1.85993e+07	9.88851e+06	8.04053e+06	1.57521e+07	1.00445e+07	3.02386e+07	4.22118e+07	3.45932e+07	3.01509e+07	1.71041e+07
0.872_413.2779		C23 H35 N5 O2	413.278	0.872						level5					7.9398e+06	7.17433e+06	6.84779e+06	7.26573e+06	1.18017e+07	9.64824e+06	6.70317e+06	7.33614e+06	9.18692e+06	8.32777e+06	7.72054e+06	2.70967e+07	1.08597e+07	2.05697e+07	1.64893e+07	1.56768e+07	8.88262e+06	1.77851e+07	8.21496e+06	6.71152e+06	1.04447e+07	4.15439e+07	4.45692e+07	4.77497e+07	1.51668e+07	2.54117e+07
0.872_435.2446		C24 H37 N O4 S	435.245	0.872						level5					1.4064e+06	1.4064e+06	1.4064e+06	1.4064e+06	1.4064e+06	1.4064e+06	1.4064e+06	1.4064e+06	1.4064e+06	1.4064e+06	1.4064e+06	2.76032e+06	2.98252e+06	3.98051e+06	8.26058e+06	5.19876e+06	2.09854e+06	2.035e+06	1.5075e+06	2.2815e+06	1.76125e+06	6.96088e+06	7.73228e+06	3.43306e+06	6.42654e+06	2.33474e+06
0.873_148.1254	N-amylbenzene	C11 H16	148.125	0.873		S10404	HMDB0059834			level4	Benzenoids	Benzene and substituted derivatives	null		2.56187e+06	2.32833e+06	1.96898e+06	2.13467e+06	1.59862e+06	2.58715e+06	2.07991e+06	2.52865e+06	2.08428e+06	1.79011e+06	2.28637e+06	4.61534e+06	353969	2.61566e+06	3.82172e+06	2.18958e+06	2.25713e+06	440156	2.28164e+06	2.73024e+06	2.70965e+06	1.27164e+07	9.57415e+06	1.10129e+07	3.57266e+06	7.21692e+06
0.873_383.2671	3-hydroxy-5, 8-tetradecadiencarnitine	C21 H37 N O5	383.267	0.873		S35032592				level4					820659	996484	1.38025e+06	575505	1.07513e+06	970353	962471	942819	590983	1.02114e+06	1.26952e+06	506997	2.41776e+06	1.11164e+06	4.10867e+06	3.49542e+06	2.73509e+06	3.52536e+06	2.35228e+06	2.65471e+06	2.75158e+06	806648	930105	773557	2.14475e+06	1.87671e+06
0.873_425.3289		C22 H44 N5 O P	425.329	0.873						level5					1.72298e+06	1.49528e+06	1.78677e+06	1.75589e+06	1.91073e+06	1.6815e+06	1.85154e+06	1.42258e+06	1.7977e+06	1.90784e+06	1.69151e+06	3.04635e+06	4.72127e+06	4.46856e+06	7.09278e+06	4.53615e+06	1.48172e+06	1.49374e+06	1.35797e+06	1.27383e+06	2.73454e+06	1.14421e+07	1.46417e+07	2.94199e+06	3.38423e+06	6.3366e+06
0.874_176.1203	2740	C12 H16 O	176.12	0.874		S190439	HMDB0031569			level4	Benzenoids	Benzene and substituted derivatives	null		2.27057e+06	2.90724e+06	2.02218e+06	2.20877e+06	2.02386e+06	2.11434e+06	2.37553e+06	2.51273e+06	1.93809e+06	2.44327e+06	2.23837e+06	4.76924e+06	3.29789e+06	2.90945e+06	3.25696e+06	3.2691e+06	1.70027e+06	2.64188e+06	2.14034e+06	1.17085e+06	2.00012e+06	1.44815e+07	1.1895e+07	1.34894e+07	2.57675e+06	8.14197e+06
0.874_337.0981		C16 H19 N O5 S	337.098	0.874						level5					123599	123599	123599	123599	123599	123599	123599	123599	123599	123599	123599	60214.4	48871.1	71804.7	87041.7	58316	523654	919164	833119	398818	2.73219e+06	75161.7	118667	85105.5	420394	191663
0.874_363.2442	N-palmitoyl taurine	C18 H37 N O4 S	363.244	0.874		MReference-4868			75.1	level2					2.20871e+06	2.26415e+06	2.30633e+06	2.17074e+06	2.24412e+06	2.26589e+06	2.22071e+06	2.17779e+06	2.44194e+06	2.14794e+06	2.20761e+06	2.62888e+06	4.53973e+06	5.55506e+06	1.3944e+07	8.69479e+06	4.15978e+06	1.71092e+06	2.30622e+06	3.55044e+06	2.30996e+06	6.52914e+06	9.30301e+06	4.84815e+06	6.95554e+06	6.63266e+06
0.874_404.2709		C20 H40 N2 O4 S	404.271	0.874						level5					1.51786e+06	1.51296e+06	1.34752e+06	1.59191e+06	1.47949e+06	1.49295e+06	1.48471e+06	1.45907e+06	1.59566e+06	1.40856e+06	1.49481e+06	2.7734e+06	2.41804e+06	3.83551e+06	7.31745e+06	4.88822e+06	3.56809e+06	1.66044e+06	1.67828e+06	2.29987e+06	1.71672e+06	5.19791e+06	8.55993e+06	3.65027e+06	6.2199e+06	2.90078e+06
0.874_562.2576	Protoporphyrin ix	C34 H34 N4 O4	562.258	0.874	C02191	S10469486	HMDB0000241			level4	Organoheterocyclic compounds	Tetrapyrroles and derivatives	Porphyrins	map00860 Porphyrin and chlorophyll metabolism; map01100 Metabolic pathways;	249127	370004	341643	317383	181551	195553	323020	278322	219506	377106	258033	223064	606899	846453	1.88676e+06	1.30958e+06	4.75879e+06	1.10542e+06	513036	4.78414e+06	2.20938e+06	664616	306990	3.75399e+06	2.49868e+06	875274
0.874_873.5508		C41 H86 N3 O10 P3	873.551	0.874						level5					773418	653731	719597	786082	791953	769669	835015	588857	816616	772016	754743	207796	4.0156e+06	2.14129e+06	2.24178e+06	3.84417e+06	3.2567e+06	1.09414e+06	156880	2.56455e+06	1.60938e+06	1.33136e+07	4.27036e+06	644363	6.62113e+06	938681
0.875_218.1309	Cis-3-hexenyl phenylacetate	C14 H18 O2	218.131	0.875		S4519184	HMDB0038281			level4	Benzenoids	Benzene and substituted derivatives	null		2.61221e+06	2.57965e+06	2.62297e+06	2.51091e+06	2.66127e+06	2.60106e+06	2.59261e+06	2.57131e+06	2.6717e+06	2.56431e+06	2.58184e+06	7.11945e+06	1.90735e+06	1.96495e+06	2.92233e+06	2.11558e+06	1.29746e+06	2.91916e+06	1.85196e+06	1.42345e+06	2.29539e+06	1.08447e+07	1.64724e+07	1.37509e+07	2.66056e+06	1.18268e+07
0.876_178.0995	Benzyl butyrate	C11 H14 O2	178.1	0.876		S7367	HMDB0033376			level4	Benzenoids	Benzene and substituted derivatives	Benzyloxycarbonyls		8.7531e+06	8.50392e+06	9.04062e+06	8.34928e+06	9.11238e+06	8.94052e+06	7.96748e+06	8.48685e+06	9.59884e+06	8.33726e+06	8.868e+06	2.75743e+07	1.21973e+07	1.05621e+07	1.03498e+07	1.00931e+07	7.69595e+06	7.25368e+06	5.82597e+06	7.09756e+06	8.75887e+06	4.14571e+07	4.48204e+07	3.19332e+07	9.75853e+06	2.47615e+07
0.876_297.1939	3-oxo-c12-hsl	C16 H27 N O4	297.194	0.876	C21201	S2497481				level4					935637	690349	341866	608438	666434	539423	638754	609043	692183	604962	575928	507337	815348	2.02668e+06	509334	295464	674677	566957	313592	465703	635913	2.72358e+06	1.91589e+06	2.43005e+06	1.5577e+06	677887
0.876_361.2284		C18 H37 N O2 P2	361.228	0.876						level5					440777	440777	440777	440777	440777	440777	440777	440777	440777	440777	440777	1.04338e+06	1.3376e+06	1.18873e+06	4.57868e+06	2.04466e+06	718877	515304	648789	882971	512547	89954.8	135912	116751	1.06374e+06	896531
0.876_372.1936	Meprednisone	C22 H28 O5	372.194	0.876		S4447637				level4					958051	958051	958051	958051	958051	958051	958051	958051	958051	958051	958051	3.61306e+06	208203	530714	475521	707688	596729	282887	306617	497231	381874	4.8159e+06	5.68082e+06	4.2788e+06	473115	6.00956e+06
0.876_399.2985		C23 H45 N S2	399.298	0.876						level5					1.75873e+06	819521	1.42393e+06	1.33962e+06	1.41956e+06	1.41993e+06	1.37706e+06	983088	1.59941e+06	1.37152e+06	1.30852e+06	2.65901e+06	1.17913e+06	2.41429e+06	2.05323e+06	2.76163e+06	2.24001e+06	2.05838e+06	2.06431e+06	2.41989e+06	3.91463e+06	7.58055e+06	6.72259e+06	7.03663e+06	1.88115e+06	2.84927e+06
0.877_142.0745	Piracetam	C6 H10 N2 O2	142.075	0.877		S4677				level4					115362	121409	129424	139444	115204	125062	123738	115602	136278	111607	131575	244964	6.16111e+06	321994	293111	236659	289710	259951	187431	283209	315601	321384	331268	259345	295204	254018
0.878_116.0627		C9 H8	116.063	0.878						level5					2.38477e+06	2.71609e+06	2.65909e+06	2.54958e+06	2.46747e+06	2.60671e+06	2.46111e+06	2.55945e+06	2.45552e+06	2.86823e+06	2.39452e+06	6.846e+06	3.54909e+06	4.51934e+06	4.33132e+06	3.89527e+06	3.69289e+06	4.00711e+06	3.05589e+06	3.79885e+06	4.27656e+06	9.86176e+06	7.47596e+06	1.04064e+07	3.96925e+06	5.70617e+06
0.878_453.3454		C27 H43 N5 O	453.345	0.878						level5					275259	360044	327274	141609	342395	396362	307510	260925	346968	198945	330441	401398	5.38998e+06	2.27503e+06	612935	1.20664e+06	832014	1.03992e+06	427172	448444	658922	1.25844e+06	235358	611210	608131	402969
0.88_267.1188		C17 H18 N P	267.119	0.88						level5					7.83518e+06	9.29539e+06	1.0349e+07	8.39468e+06	7.68022e+06	8.7934e+06	9.88602e+06	7.77897e+06	9.02253e+06	7.63779e+06	9.87887e+06	2.74462e+07	1.11071e+07	2.47728e+07	2.13032e+07	1.88254e+07	2.24936e+07	1.79446e+07	1.41709e+07	1.94519e+07	1.93679e+07	1.79722e+07	1.12144e+07	1.3357e+07	1.26907e+07	1.40191e+07
0.88_425.2415		C23 H31 N5 O3	425.241	0.88						level5					1.33708e+06	1.36636e+06	1.29118e+06	1.36086e+06	1.30647e+06	1.04472e+06	1.36041e+06	1.19273e+06	1.55675e+06	1.29742e+06	1.23794e+06	2.98915e+06	554019	575425	545971	1.22919e+06	550901	852025	344841	599966	538753	7.12127e+06	1.6612e+07	7.95436e+06	800221	4.355e+06
0.881_106.0783	P-xylene	C8 H10	106.078	0.881	C06756	S7521	HMDB0059924			level4	Benzenoids	Benzene and substituted derivatives	Xylenes	map01100 Metabolic pathways;	1.15575e+07	7.61205e+06	8.15155e+06	8.96153e+06	8.32019e+06	9.90543e+06	1.06236e+07	1.03276e+07	9.17619e+06	4.88488e+06	1.30463e+07	2.60725e+07	1.34192e+07	2.28396e+07	2.92915e+07	2.04042e+07	2.20078e+07	1.55619e+07	1.16325e+07	2.66934e+07	2.20471e+07	2.00573e+07	1.10999e+07	2.37687e+07	2.19269e+07	1.9804e+07
0.881_236.1414	4-(heptyloxy)benzoic acid	C14 H20 O3	236.141	0.881	C14274	S76800				level4				NULL	2.34075e+06	2.36965e+06	3.51249e+06	2.65786e+06	2.47561e+06	2.67769e+06	2.40715e+06	2.93273e+06	3.16341e+06	2.56958e+06	2.16263e+06	1.0254e+07	2.67155e+06	3.10221e+06	4.17525e+06	2.78134e+06	1.45231e+06	3.58568e+06	2.20815e+06	2.17243e+06	2.69539e+06	1.6219e+07	2.1884e+07	1.81449e+07	2.93693e+06	1.4418e+07
0.881_373.2851		C19 H40 N3 O2 P	373.285	0.881						level5					5.33563e+06	4.75864e+06	4.33304e+06	4.64456e+06	8.49018e+06	5.98676e+06	4.29447e+06	5.09114e+06	6.15464e+06	5.75457e+06	4.72984e+06	1.99965e+07	4.58077e+06	6.24877e+06	6.53037e+06	6.56325e+06	4.67158e+06	9.23781e+06	5.50301e+06	4.09253e+06	7.24091e+06	2.89262e+07	2.96638e+07	3.74623e+07	9.00729e+06	1.88096e+07
0.882_261.1153		C18 H15 N O	261.115	0.882						level5					993533	1.09302e+06	1.10161e+06	1.0334e+06	1.19125e+06	1.09684e+06	944343	854253	1.56276e+06	907773	1.12608e+06	164013	145496	210004	160563	146452	3.88697e+06	1.10067e+07	9.25978e+06	5.05903e+06	4.79367e+06	211641	173090	199650	3.3455e+06	1.2386e+06
0.882_442.2829	Mazipredone	C26 H38 N2 O4	442.283	0.882		S5840				level4					486219	784090	714123	558363	596388	458911	577082	547719	954064	496789	549664	645075	406855	550146	987344	1.26558e+06	1.0809e+06	7.40721e+06	3.73121e+06	859753	4.25603e+06	1.53956e+06	532250	697203	1.318e+06	1.53089e+06
0.883_196.1103	Hexyl 2-furoate	C11 H16 O3	196.11	0.883		S55834	HMDB0037725			level4	Organoheterocyclic compounds	Furans	Furoic acid and derivatives		3.86953e+06	4.72647e+06	2.82802e+06	4.48161e+06	3.94306e+06	3.92905e+06	3.90718e+06	3.8562e+06	4.09687e+06	3.78642e+06	3.9128e+06	1.32586e+07	2.614e+06	4.43741e+06	3.22445e+06	5.01139e+06	2.36916e+06	2.93397e+06	2.72317e+06	2.89247e+06	3.07201e+06	5.69529e+06	1.19634e+07	6.93244e+06	4.47015e+06	5.7e+06
0.883_242.0726	Lidimycin	C10 H14 N2 O3 S	242.073	0.883		S4938688				level4					7.61989e+06	6.80994e+06	7.74266e+06	6.67401e+06	7.84395e+06	7.28148e+06	7.23387e+06	7.48789e+06	7.68824e+06	6.74738e+06	7.44833e+06	229762	2.32367e+06	391165	2.96672e+06	336258	1.57874e+07	1.47837e+07	1.0785e+06	1.18136e+07	6.17899e+06	401017	237909	1.0643e+06	2.70437e+07	3.00017e+06
0.883_407.3043	Cassaidine	C24 H41 N O4	407.304	0.883	C08669	S4444672				level4	Alkaloids	Alkaloids derived by amination reactions	Terpenoid alkaloids	NULL	6.94545e+06	6.94545e+06	6.94545e+06	6.94545e+06	6.94545e+06	6.94545e+06	6.94545e+06	6.94545e+06	6.94545e+06	6.94545e+06	6.94545e+06	8.82612e+06	2.19192e+07	6.05627e+07	1.98212e+07	5.33726e+07	1.74117e+07	2.44915e+07	1.03721e+07	2.44075e+07	2.10254e+07	5.01762e+07	1.35407e+07	2.49152e+07	1.7683e+07	2.27491e+07
0.885_108.094	4-vinylcyclohexene	C8 H12	108.094	0.885	C19310	S7218				level4				NULL	9.24386e+06	7.4626e+06	7.07388e+06	7.03669e+06	6.43698e+06	7.57917e+06	7.1561e+06	8.29506e+06	6.34919e+06	7.64026e+06	7.92009e+06	2.80253e+07	1.45322e+07	1.89865e+07	1.01342e+07	1.54751e+07	5.137e+06	1.00465e+07	3.63787e+06	5.97672e+06	6.19578e+06	4.55022e+07	2.69189e+07	1.7044e+07	9.73099e+06	2.41364e+07
0.885_229.1679	1872050	C12 H23 N O3	229.168	0.885		S1361783	HMDB0013267			level4	Organic acids and derivatives	Carboxylic acids and derivatives	Amino acids, peptides, and analogues		4.4284e+06	4.38522e+06	4.76976e+06	5.32382e+06	4.56061e+06	5.92848e+06	4.22419e+06	4.41801e+06	5.47384e+06	4.40837e+06	4.75999e+06	1.43797e+07	1.01572e+07	1.83959e+07	3.26124e+06	5.57315e+06	1.64636e+07	9.86889e+06	3.6035e+06	9.84929e+06	5.16397e+06	4.27334e+06	5.54828e+06	5.744e+06	7.42207e+06	6.21115e+06
0.885_387.1763		C13 H30 N3 O8 P	387.176	0.885						level5					3.67966e+08	3.10557e+08	3.3849e+08	3.56312e+08	2.27985e+08	3.66025e+08	3.52708e+08	3.42307e+08	3.77146e+08	2.2501e+08	3.58729e+08	9.377e+08	4.26281e+08	8.34227e+08	9.54247e+08	8.67989e+08	8.83789e+08	7.06237e+08	5.90104e+08	3.54823e+08	8.2922e+08	7.1491e+08	4.77801e+08	4.97846e+08	4.77366e+08	4.34437e+08
0.886_201.1731	11-aminoundecanoic acid	C11 H23 N O2	201.173	0.886	C19325	S16168				level4				NULL	844459	824397	827856	923846	817379	854537	826708	854065	867699	836697	837464	2.42561e+06	1.94377e+06	1.94812e+06	338448	391175	3.09684e+06	1.93235e+06	387315	2.23615e+06	804538	443035	373610	255196	1.40915e+06	505213
0.886_418.283		C25 H34 N6	418.283	0.886						level5					1.23132e+06	1.32534e+06	1.24369e+06	1.27987e+06	1.25101e+06	1.26632e+06	1.26603e+06	1.26486e+06	1.25473e+06	1.29087e+06	1.25321e+06	2.80363e+06	1.12839e+06	1.30719e+06	2.23584e+06	1.74303e+06	2.21412e+06	1.48473e+07	6.75665e+06	1.82006e+06	5.59506e+06	1.97367e+06	1.34336e+06	3.69648e+06	3.36819e+06	2.17834e+06
0.887_403.1994		C23 H25 N5 O2	403.199	0.887						level5					9.92129e+08	3.03723e+08	8.71352e+08	9.2884e+08	8.83047e+08	8.48241e+08	8.20277e+08	6.69117e+08	8.01904e+08	7.03908e+08	7.24126e+08	2.53614e+09	9.83843e+08	1.94727e+09	1.94885e+09	6.93308e+08	1.922e+09	1.78434e+09	1.24855e+09	1.51876e+09	1.77512e+09	1.84609e+09	9.05112e+08	1.30215e+09	8.40303e+08	9.37142e+08
0.888_303.1259		C20 H17 N O2	303.126	0.888						level5					230739	102007	119964	180697	142979	110678	155151	155092	103751	176572	163011	223470	195887	300793	272742	249505	344350	2.51679e+06	2.2364e+06	712279	2.25419e+06	343787	252000	256643	3.71004e+06	633792
0.888_456.2988		C21 H41 N6 O3 P	456.299	0.888						level5					8.30331e+06	6.47739e+06	7.96877e+06	1.05571e+07	7.70089e+06	8.23173e+06	7.99775e+06	7.74866e+06	8.50753e+06	8.3135e+06	7.74364e+06	1.93533e+07	2.1973e+07	3.00977e+07	3.30353e+07	3.08233e+07	1.52959e+07	2.40701e+07	1.97066e+07	1.38109e+07	1.62856e+07	4.19056e+07	2.8964e+07	1.63923e+07	2.89953e+07	1.60357e+07
0.889_403.142	[similar to: cortisone; δmass: 42.9483 da]		403.142	0.889						level5					839931	965079	483366	896548	1.23202e+06	849713	742670	862055	1.00725e+06	693582	866831	372775	289255	419356	373493	337453	1.87148e+06	1.26075e+07	3.04357e+06	2.05232e+06	2.76399e+06	485097	385821	402335	1.52465e+06	1.00112e+06
0.89_194.131	Sedanolide	C12 H18 O2	194.131	0.89	C17002	MReference-6215	HMDB0034450		79.4	level2	Organoheterocyclic compounds	Isobenzofurans	null	NULL	1.01544e+07	8.83605e+06	8.30427e+06	7.11792e+06	7.23755e+06	9.51248e+06	8.10978e+06	7.23406e+06	9.77087e+06	7.35931e+06	9.38081e+06	2.34035e+07	9.81256e+06	1.6277e+07	5.55449e+06	6.31491e+06	1.33576e+07	7.75968e+06	5.45816e+06	4.82827e+06	7.05975e+06	3.9176e+07	3.93609e+07	4.53462e+07	8.90605e+06	2.52147e+07
0.89_415.2076		C15 H34 N3 O8 P	415.208	0.89						level5					6.61554e+08	4.75845e+08	7.15469e+08	6.72275e+08	5.78306e+08	6.18651e+08	5.99971e+08	5.93468e+08	6.78124e+08	6.66235e+08	5.36694e+08	7.48244e+08	2.39117e+08	5.12781e+08	1.61742e+09	4.94509e+08	1.86335e+09	5.65447e+08	6.75434e+08	4.53176e+08	1.27312e+09	3.57506e+08	8.10927e+08	1.01477e+09	1.66471e+09	4.78003e+08
0.89_431.2308		C24 H33 N O6	431.231	0.89						level5					2.41783e+09	2.02177e+09	2.44191e+09	2.67118e+09	1.03769e+09	2.61043e+09	2.54249e+09	1.46974e+09	2.42913e+09	1.97117e+09	2.28379e+09	5.70914e+09	3.3713e+09	2.02558e+09	6.3782e+09	1.85984e+09	2.59998e+09	5.06232e+09	4.25332e+09	6.85076e+08	6.50022e+09	4.78457e+09	3.52527e+09	4.341e+09	5.13788e+09	4.54465e+09
0.89_453.2937		C22 H47 N O4 S2	453.294	0.89						level5					9.42947e+06	8.80546e+06	7.29799e+06	7.74074e+06	7.04655e+06	8.24296e+06	6.88268e+06	8.4823e+06	1.02775e+07	6.93583e+06	7.64024e+06	1.45726e+07	2.90779e+07	1.96545e+07	2.98705e+07	3.6337e+07	1.94934e+07	4.7326e+07	9.14893e+06	1.21612e+07	1.42313e+07	4.49849e+07	6.41113e+07	2.53575e+07	2.77372e+07	2.19392e+07
0.891_416.2104		C18 H34 N4 O3 P2	416.21	0.891						level5					1.54036e+08	1.48455e+08	1.5378e+08	1.69621e+08	1.51751e+08	1.80239e+08	1.86996e+08	1.75326e+08	8.33364e+07	1.84361e+08	2.03639e+08	3.74068e+08	2.226e+08	4.41875e+08	4.59916e+08	3.89893e+08	5.17009e+08	3.2034e+08	3.52051e+08	4.92495e+08	5.30276e+08	3.40619e+08	2.50846e+08	3.08659e+08	1.51443e+08	3.56508e+08
0.891_475.2759		C27 H41 N O4 S	475.276	0.891						level5					7.07663e+06	7.28954e+06	6.28578e+06	6.97468e+06	6.6331e+06	6.92152e+06	6.9372e+06	6.71671e+06	7.69467e+06	5.93908e+06	7.18242e+06	1.51677e+07	2.90983e+07	1.543e+07	1.87025e+07	2.38198e+07	1.25615e+07	4.55138e+07	5.70196e+06	9.77471e+06	9.981e+06	3.79731e+07	3.71849e+07	2.58424e+07	1.99139e+07	1.31978e+07
0.892_225.0461		C10 H11 N O3 S	225.046	0.892						level5					1.87039e+07	2.01166e+07	1.97896e+07	1.85735e+07	1.98952e+07	1.92689e+07	1.92807e+07	1.93624e+07	2.08908e+07	1.80789e+07	1.94265e+07	493292	5.72485e+06	721674	4.19976e+06	646984	3.68043e+07	3.54086e+07	4.11291e+06	1.72289e+07	2.38503e+07	756850	589028	3.07025e+06	7.55789e+07	6.73362e+06
0.892_320.1734		C18 H20 N6	320.173	0.892						level5					4.58458e+06	3.91574e+06	4.69907e+06	3.57538e+06	4.5549e+06	4.45188e+06	4.85276e+06	3.7184e+06	5.05247e+06	3.8132e+06	4.30804e+06	2.68564e+06	1.26036e+07	5.84568e+06	5.49307e+06	1.26396e+07	1.17081e+07	6.22149e+06	3.10355e+06	9.32684e+06	4.03131e+06	7.34906e+06	7.89135e+06	3.98185e+06	3.89377e+06	5.00551e+06
0.893_396.299		C16 H41 N6 O3 P	396.299	0.893					60.3	level5					5.61091e+06	5.97857e+06	3.93662e+06	4.31585e+06	4.0993e+06	6.01081e+06	3.62907e+06	3.53806e+06	6.05626e+06	4.79448e+06	5.43296e+06	5.81082e+06	4.56288e+06	6.30451e+06	6.67471e+06	8.13915e+06	5.99973e+06	2.94169e+07	1.56857e+07	5.15927e+06	1.45357e+07	9.84703e+06	9.35553e+06	1.20004e+07	8.72828e+06	6.37723e+06
0.894_252.0787	Anisindione	C16 H12 O3	252.079	0.894		S2112	HMDB0015257			level4	Benzenoids	Indanes	Indanones		549008	542672	654179	823387	537048	688065	627486	584992	569689	578016	711360	198262	158008	234026	223429	192389	1.08563e+06	1.23886e+07	1.91124e+06	932209	2.04218e+06	269271	233284	218607	1.90471e+06	607273
0.894_263.1157	(2e)-3-(4-hydroxy-3-methoxyphenyl)-n-(4-oxobutyl)acrylamide	C14 H17 N O4	263.116	0.894		S74854116				level4					2.89479e+06	2.48385e+06	1.85366e+06	3.13596e+06	2.73913e+06	4.35749e+06	2.08139e+06	3.09589e+06	3.34393e+06	1.64285e+06	3.14422e+06	218771	3.11202e+06	249933	1.81199e+06	415056	4.71207e+06	2.5788e+07	4.26171e+06	4.9232e+06	1.12781e+07	877226	1.01217e+06	1.28399e+06	3.62169e+07	4.34499e+06
0.894_277.095		C15 H19 N S2	277.095	0.894						level5					781329	908703	804099	782255	736667	831215	598066	882596	791239	781356	855870	148808	723594	182571	227594	151190	3.39699e+06	3.90767e+06	3.17666e+06	3.16332e+06	1.92212e+06	209683	169426	505342	3.03421e+06	1.21065e+06
0.894_385.3021		C22 H43 N O2 S	385.302	0.894						level5					9.44771e+06	9.44771e+06	9.44771e+06	9.44771e+06	9.44771e+06	9.44771e+06	9.44771e+06	9.44771e+06	9.44771e+06	9.44771e+06	9.44771e+06	7.53332e+06	2.0361e+08	2.60623e+08	4.30777e+07	1.03832e+08	3.1201e+07	1.76868e+08	6.8871e+07	1.34246e+08	1.23557e+08	3.15986e+08	5.233e+07	1.66748e+08	8.24397e+07	5.40349e+07
0.894_432.2986		C25 H40 N2 O4	432.299	0.894						level5					1.96348e+07	1.353e+07	1.35113e+07	2.27737e+07	1.21292e+07	1.66918e+07	1.49153e+07	1.50833e+07	1.57656e+07	1.75542e+07	1.56296e+07	3.70242e+07	3.58775e+07	9.75457e+07	6.45633e+07	5.66971e+07	2.48399e+07	4.67018e+07	3.95263e+07	3.36102e+07	3.62849e+07	9.82678e+07	8.42756e+07	4.09238e+07	5.07596e+07	3.40056e+07
0.896_197.1418		C11 H19 N O2	197.142	0.896						level5					8.4856e+06	7.17421e+06	8.5145e+06	7.69348e+06	9.8693e+06	7.98609e+06	8.32906e+06	7.01411e+06	9.34018e+06	8.58616e+06	8.01499e+06	1.845e+07	9.79094e+06	2.62609e+07	5.11432e+06	9.16829e+06	2.07362e+07	2.74516e+07	1.34085e+07	1.71618e+07	1.69002e+07	5.46904e+06	1.66151e+07	1.57856e+07	1.00481e+07	1.12571e+07
0.896_211.1575	Elaeokanine c	C12 H21 N O2	211.157	0.896	C10592	S391168				level4	Alkaloids	Alkaloids derived from lysine	Indolizidine alkaloids	NULL	2.84211e+06	3.01154e+06	3.01416e+06	3.04976e+06	2.89536e+06	3.43383e+06	2.9066e+06	2.78421e+06	3.28951e+06	2.94955e+06	2.90997e+06	8.16051e+06	6.91487e+06	1.14394e+07	2.10504e+06	3.06336e+06	9.67208e+06	5.00616e+06	2.02707e+06	2.37578e+06	3.0855e+06	2.59725e+06	2.72551e+06	2.8318e+06	4.54315e+06	3.67421e+06
0.896_269.1991	Ethyl n-[(2-isopropyl-5-methylcyclohexyl)carbonyl]glycinate	C15 H27 N O3	269.199	0.896		S9696656	HMDB0032255			level4	Organic acids and derivatives	Carboxylic acids and derivatives	Amino acids, peptides, and analogues		2.11531e+06	2.06961e+06	1.96985e+06	2.46435e+06	1.9831e+06	2.09969e+06	2.22107e+06	2.03577e+06	2.24725e+06	2.10347e+06	2.02828e+06	4.65816e+06	5.36109e+06	6.94291e+06	923386	2.14915e+06	5.43253e+06	4.95654e+06	1.1857e+06	6.2862e+06	1.70028e+06	2.9356e+06	1.00258e+06	561935	5.21964e+06	1.93173e+06
0.896_283.1783	6571082	C15 H25 N O4	283.178	0.896		S102899	HMDB0060994			level4	Benzenoids	Phenol ethers	null		352222	480172	431666	429435	542894	427633	449114	434834	371387	484899	461907	540088	169369	439824	173458	142081	413685	383167	111089	446819	164843	1.46266e+06	2.67607e+06	544957	402750	635158
0.896_451.2756		C19 H42 N5 O3 P S	451.276	0.896						level5					1.3717e+07	1.11051e+07	1.00125e+07	1.71559e+07	7.93115e+06	1.35714e+07	9.92257e+06	1.2773e+07	1.48579e+07	9.16769e+06	1.18287e+07	2.08423e+07	2.98143e+07	2.82464e+07	3.44861e+07	6.78296e+07	1.91709e+07	5.08697e+07	1.92296e+07	1.74589e+07	2.05271e+07	5.88119e+07	1.86961e+08	3.04734e+07	4.86779e+07	2.73883e+07
0.897_371.2671		C20 H37 N O5	371.267	0.897					87.4	level5					1.03126e+07	1.19977e+07	9.59755e+06	1.27694e+07	9.58852e+06	1.79976e+07	1.04533e+07	1.01366e+07	1.41146e+07	1.30377e+07	8.0935e+06	5.76604e+07	8.32723e+06	1.11364e+07	1.01484e+07	7.32344e+06	6.54445e+06	1.39113e+07	1.30314e+07	7.18587e+06	1.72536e+07	5.77702e+07	8.69432e+07	8.61164e+07	1.12739e+07	5.56596e+07
0.898_216.1153	2978	C14 H16 O2	216.115	0.898		S2297699				level4					719288	538535	691173	607167	736075	361102	732491	734513	521451	611491	684574	2.08589e+06	237457	347990	406650	381078	191349	562307	566841	427872	393516	2.54359e+06	3.12822e+06	3.16399e+06	578701	2.47307e+06
0.898_368.1623	4,4-bis[4-(acetyloxy)phenyl]3-hexanone	C22 H24 O5	368.162	0.898	C15145	S209728			51	level4				NULL	1.23683e+07	1.28835e+07	1.28068e+07	1.22525e+07	1.25988e+07	1.16944e+07	1.34531e+07	1.24667e+07	1.26977e+07	1.22997e+07	1.2437e+07	3.46849e+07	1.09511e+07	2.07373e+07	3.06211e+07	3.18309e+07	3.19855e+07	2.31563e+07	1.91949e+07	2.65879e+07	2.78496e+07	2.58674e+07	9.09584e+06	1.7467e+07	1.41444e+07	1.72794e+07
0.899_394.283		C24 H43 P S	394.283	0.899						level5					4.22115e+06	3.6298e+06	4.08028e+06	4.14383e+06	4.03312e+06	3.66574e+06	4.05622e+06	3.69555e+06	4.55451e+06	3.77434e+06	3.97571e+06	1.04808e+07	4.80106e+06	6.78083e+06	3.81275e+06	5.99364e+06	5.86233e+06	1.99823e+07	8.58234e+06	6.14748e+06	1.00005e+07	3.68692e+06	1.31029e+07	1.24322e+07	7.66483e+06	4.88355e+06
0.899_499.3626		C26 H49 N3 O6	499.363	0.899						level5					2.31998e+06	2.31998e+06	2.31998e+06	2.31998e+06	2.31998e+06	2.31998e+06	2.31998e+06	2.31998e+06	2.31998e+06	2.31998e+06	2.31998e+06	3.59373e+06	1.16417e+07	1.03563e+07	3.60947e+06	1.47892e+07	5.14501e+06	1.28809e+07	3.61211e+06	8.1536e+06	7.65033e+06	1.63019e+07	5.60721e+06	1.10896e+07	6.27714e+06	6.0146e+06
0.9_381.1575		C16 H32 N O3 P S2	381.158	0.9						level5					1.67772e+06	1.38555e+06	1.46339e+06	1.45631e+06	1.45558e+06	1.5228e+06	1.4351e+06	1.49464e+06	1.36654e+06	1.55342e+06	1.56367e+06	1.09626e+06	1.69836e+06	903202	620404	862546	2.20693e+06	7.41254e+06	4.39532e+06	1.76152e+06	3.65906e+06	1.20669e+06	207159	425168	4.3301e+06	3.02169e+06
0.901_410.3151		C23 H42 N2 O4	410.315	0.901						level5					4.23222e+07	2.73053e+07	2.80227e+07	4.74414e+07	3.60074e+07	3.27511e+07	3.96458e+07	3.08764e+07	3.44227e+07	4.20857e+07	3.21723e+07	4.90542e+07	7.75142e+07	1.71998e+08	1.7231e+08	1.42524e+08	6.73175e+07	1.19511e+08	6.89023e+07	6.7451e+07	6.54129e+07	1.60379e+08	1.30281e+08	6.46863e+07	8.99862e+07	8.98358e+07
0.902_387.1485		C15 H26 N5 O3 P S	387.149	0.902						level5					285698	200314	293081	264611	336928	231405	261809	260704	362438	413441	139816	207722	256787	502590	332940	444225	1.41255e+06	3.62864e+06	1.34025e+06	199148	1.15484e+06	547317	275670	326093	647425	1.14091e+06
0.903_275.1158	Dubinidine	C15 H17 N O4	275.116	0.903	C10662	S391202				level4	Alkaloids	Alkaloids derived from tryptophan and anthranilic acid	Quinoline alkaloids	NULL	1.97661e+07	1.90186e+07	2.01231e+07	2.04942e+07	2.10939e+07	2.01135e+07	2.00807e+07	1.86842e+07	2.32501e+07	1.79896e+07	2.04718e+07	1.07012e+06	4.05342e+07	2.38753e+07	3.56531e+07	3.41841e+07	4.60932e+07	3.15129e+07	2.1713e+07	4.23912e+07	3.0768e+07	6.33303e+07	4.32936e+07	1.16328e+07	4.50569e+07	2.43766e+07
0.904_316.1991		C15 H28 N2 O5	316.199	0.904					49.1	level5					147538	136794	154040	159342	149199	153989	148229	139137	153387	156647	146346	310115	283854	420535	401859	344010	379877	323893	226955	302055	359991	483835	378684	392690	331431	330510
0.905_411.2621		C23 H41 N O S2	411.262	0.905						level5					2.24011e+06	2.22854e+06	2.29949e+06	3.07163e+06	2.29014e+06	2.34923e+06	2.44147e+06	2.22896e+06	2.42669e+06	2.26182e+06	2.62217e+06	4.15671e+06	1.07854e+06	1.24658e+06	1.00638e+06	879101	1.20936e+06	3.42405e+06	1.64277e+06	1.10168e+06	2.62051e+06	1.71477e+07	2.00014e+07	1.3778e+07	2.96159e+06	6.99584e+06
0.906_439.3297		C25 H45 N O5	439.33	0.906						level5					5.0643e+06	5.43316e+06	3.3233e+06	4.72e+06	3.94998e+06	4.59382e+06	4.02898e+06	4.16784e+06	5.34724e+06	4.26307e+06	4.32661e+06	1.08679e+07	1.26078e+07	3.13961e+07	1.17757e+07	2.67051e+07	7.27063e+06	4.6478e+06	1.07787e+06	4.99164e+06	2.69238e+06	1.12954e+07	5.4334e+06	1.04652e+07	8.86345e+06	3.90247e+06
0.907_277.2406		C18 H31 N O	277.241	0.907						level5					7.38712e+06	7.38712e+06	7.38712e+06	7.38712e+06	7.38712e+06	7.38712e+06	7.38712e+06	7.38712e+06	7.38712e+06	7.38712e+06	7.38712e+06	2.30641e+07	3.41434e+08	6.2846e+07	1.55752e+06	2.99686e+06	2.6227e+06	7.83279e+07	7.34357e+07	2.44476e+07	1.05572e+08	7.17814e+07	7.89698e+07	1.02926e+09	1.38857e+08	1.73251e+07
0.908_213.1731		C12 H23 N O2	213.173	0.908						level5					2.18198e+06	2.18198e+06	2.18198e+06	2.18198e+06	2.18198e+06	2.18198e+06	2.18198e+06	2.18198e+06	2.18198e+06	2.18198e+06	2.18198e+06	4.03498e+07	789915	6.87766e+06	6.36463e+06	640275	5.17216e+06	7.79136e+06	792158	3.20186e+06	1.73338e+06	1.68811e+06	719722	3.60978e+06	363509	2.55566e+06
0.908_357.2877		C20 H39 N O4	357.288	0.908						level5					1.74981e+06	2.49889e+06	3.68633e+06	1.90214e+06	1.88244e+06	2.09514e+06	2.19598e+06	2.54033e+06	2.48208e+06	2.18987e+06	1.92948e+06	2.34069e+06	4.84562e+06	6.49754e+06	5.39018e+06	8.21637e+06	3.28117e+06	5.60793e+06	2.36617e+06	1.451e+06	2.43294e+06	1.02261e+07	1.13923e+07	1.81577e+06	4.5755e+06	2.40051e+06
0.908_429.2914		C23 H45 N O2 P2	429.291	0.908						level5					1.62531e+07	2.10045e+07	1.70851e+07	8.12406e+06	1.14944e+07	1.8056e+07	1.02642e+07	1.40855e+07	1.40619e+07	2.03052e+07	1.21335e+07	1.93883e+07	2.8141e+07	2.40879e+07	3.82287e+07	6.43003e+07	3.84944e+07	6.49226e+07	1.35014e+07	2.1231e+07	2.25924e+07	6.89306e+07	1.28664e+08	3.05249e+07	3.17168e+07	2.68061e+07
0.91_408.2987		C17 H41 N6 O3 P	408.299	0.91						level5					2.34457e+07	2.41942e+07	1.97391e+07	3.37997e+07	2.30324e+07	3.33485e+07	1.85454e+07	2.49123e+07	1.88169e+07	2.75847e+07	3.06388e+07	2.27016e+07	5.04468e+07	1.08556e+08	9.13679e+07	6.94915e+07	5.10691e+07	7.87518e+07	4.7781e+07	3.68947e+07	7.42119e+07	1.97098e+08	1.34365e+08	7.1469e+07	1.01716e+08	6.27084e+07
0.91_429.2933		C22 H44 N3 O P S	429.293	0.91						level5					3.42721e+07	3.71301e+07	3.17447e+07	1.57233e+07	1.79401e+07	3.27278e+07	1.8259e+07	2.94824e+07	2.62786e+07	3.49837e+07	2.17764e+07	5.16289e+07	5.2153e+07	4.69223e+07	6.58587e+07	1.19079e+08	5.28191e+07	1.05876e+08	2.96507e+07	3.5071e+07	3.9088e+07	1.42958e+08	2.84618e+08	5.5056e+07	7.26389e+07	4.89206e+07
0.911_161.0843	Tryptophol	C10 H11 N O	161.084	0.911	C00955	S10235	HMDB0003447			level4	Organoheterocyclic compounds	Indoles and derivatives	Indoles	map00380 Tryptophan metabolism;	3.54937e+06	3.05872e+06	3.90337e+06	3.73996e+06	3.46965e+06	3.5161e+06	3.57871e+06	3.47167e+06	3.70627e+06	3.52312e+06	3.39462e+06	3.3092e+06	3.09751e+06	5.00488e+06	4.70277e+06	7.67702e+06	1.83727e+06	5.20853e+06	2.81095e+06	3.86112e+06	4.60942e+06	6.37703e+06	5.32033e+06	6.05857e+06	9.63493e+06	4.71855e+06
0.911_208.1214	Pilocarpine	C11 H16 N2 O2	208.121	0.911	C07474	S5699	HMDB0015217			level4	Alkaloids and derivatives	null	null		490180	429232	672812	430506	744200	492906	595614	365507	427431	650371	688237	70769	1.57807e+06	395602	630395	1.10383e+06	1.55164e+06	127278	520821	1.05664e+06	454029	6.0303e+06	508439	132869	2.02279e+06	186834
0.912_401.2414	6-hydroxybuspirone	C21 H31 N5 O3	401.241	0.912		S8106544	HMDB0061110			level4	Organoheterocyclic compounds	Diazinanes	Piperazines		3.11259e+06	4.671e+06	2.41818e+06	3.28142e+06	2.8133e+06	5.32177e+06	3.14063e+06	3.08631e+06	3.81236e+06	3.32709e+06	2.94535e+06	9.41822e+06	7.07981e+06	7.01418e+06	9.35301e+06	9.38154e+06	3.27626e+06	3.31095e+06	1.86114e+06	3.09481e+06	3.16104e+06	2.60741e+07	4.71421e+07	1.8543e+07	3.04727e+06	1.25194e+07
0.912_415.1422		C26 H17 N5 O	415.142	0.912						level5					1.80628e+06	1.65282e+06	1.66462e+06	1.94788e+06	1.619e+06	1.77648e+06	1.72674e+06	1.68836e+06	1.79602e+06	1.5981e+06	1.86688e+06	146997	386224	207609	238741	178458	1.90049e+06	2.45052e+07	2.97164e+06	1.70807e+06	7.68799e+06	237394	226652	191242	5.50403e+06	3.14607e+06
0.913_179.0949	Salsolinol	C10 H13 N O2	179.095	0.913	C09642	BGI510	HMDB0042012	15.6		level3	Alkaloids	Alkaloids derived from tyrosine	Isoquinoline alkaloids		4.29498e+06	2.26738e+06	4.10432e+06	4.26376e+06	4.16179e+06	4.672e+06	3.65431e+06	4.03265e+06	3.02487e+06	3.90353e+06	4.07453e+06	1.5192e+06	2.85635e+06	2.21879e+06	1.99393e+06	2.86489e+06	8.09609e+06	3.36533e+07	1.40093e+07	8.57696e+06	1.29428e+07	3.40828e+06	5.16036e+06	3.44952e+06	1.48931e+07	5.05139e+06
0.914_215.1524	11343172	C11 H21 N O3	215.152	0.914	C18830	S94028				level4				NULL	4.96217e+06	4.24948e+06	4.8743e+06	3.93924e+06	5.87878e+06	4.83899e+06	4.74564e+06	4.23373e+06	4.5423e+06	5.41056e+06	4.67431e+06	9.58556e+06	5.66089e+06	2.11421e+07	2.08845e+06	5.65843e+06	1.66468e+07	8.48777e+06	5.36875e+06	1.33111e+07	7.76556e+06	2.37515e+06	3.37806e+06	4.49942e+06	4.27118e+06	6.82314e+06
0.916_345.1786		C16 H27 N O7	345.179	0.916						level5					1.63322e+06	1.55046e+06	1.7624e+06	2.32144e+06	2.2156e+06	1.73678e+06	1.88681e+06	2.06756e+06	1.04767e+06	2.53245e+06	2.06904e+06	3.17464e+06	4.13268e+06	7.41959e+06	7.547e+06	9.4736e+06	1.68282e+06	1.09092e+06	2.32582e+06	1.29617e+06	1.54699e+06	491119	3.13619e+06	1.30064e+06	1.01376e+06	3.59066e+06
0.916_427.2757		C23 H41 N O4 S	427.276	0.916						level5					1.4102e+07	1.33395e+07	1.92527e+07	1.6177e+07	9.55979e+06	1.17575e+07	1.81282e+07	1.0202e+07	1.43704e+07	1.52315e+07	1.5327e+07	2.01837e+07	2.43417e+07	1.71269e+07	1.76614e+07	4.43163e+07	2.23107e+07	4.9599e+07	2.19019e+07	2.49978e+07	2.04907e+07	1.2679e+08	2.17932e+08	4.4509e+07	7.27745e+07	2.53345e+07
0.917_185.1418	Atagabalin	C10 H19 N O2	185.142	0.917		S7970252				level4					9.5358e+06	7.84789e+06	8.47424e+06	9.059e+06	7.27889e+06	1.00855e+07	7.26995e+06	9.77684e+06	8.01568e+06	8.63891e+06	8.31692e+06	2.54343e+07	1.17041e+07	1.65151e+07	9.31019e+06	9.88191e+06	1.09914e+07	2.37188e+07	1.51009e+07	1.10813e+07	1.43407e+07	1.17138e+07	1.06003e+07	4.91711e+06	1.26526e+07	9.3095e+06
0.918_195.1262	4-(2-aminopropoxy)-3,5-dimethylphenol	C11 H17 N O2	195.126	0.918		S84217	HMDB0060954			level4	Benzenoids	Phenols	4-alkoxyphenols		1.67162e+06	1.8831e+06	1.95292e+06	1.75012e+06	1.79225e+06	1.85417e+06	2.29779e+06	1.72664e+06	1.87956e+06	1.35344e+06	2.21331e+06	1.73199e+06	4.17028e+06	3.13184e+06	7.46393e+06	3.5196e+06	2.95138e+06	1.92329e+06	2.39309e+06	3.96602e+06	2.5751e+06	6.23592e+06	4.65601e+06	3.43989e+06	4.33236e+06	3.71893e+06
0.918_241.1315	Mfcd08277025	C12 H19 N O4	241.131	0.918	C11841	S112971				level4	FA Fatty acyls	FA08 Fatty amides	FA0803 Fatty acyl homoserine lactones		3.44924e+06	3.44924e+06	3.44924e+06	3.44924e+06	3.44924e+06	3.44924e+06	3.44924e+06	3.44924e+06	3.44924e+06	3.44924e+06	3.44924e+06	1.6588e+06	3.99391e+06	2.12514e+06	4.75609e+06	2.94539e+06	7.4436e+06	2.50964e+06	6.15775e+06	8.89761e+06	6.31167e+06	4.19211e+06	5.29258e+06	1.96265e+06	5.7615e+06	3.74788e+06
0.918_259.1209	Ilepcimide	C15 H17 N O3	259.121	0.918		S556435				level4					7.31914e+06	6.99556e+06	6.97844e+06	7.19468e+06	7.2338e+06	7.19743e+06	7.13536e+06	6.99899e+06	7.42048e+06	6.95026e+06	7.20386e+06	178242	3.45866e+07	2.34583e+06	6.62849e+06	9.19837e+06	2.53162e+07	1.54483e+07	2.51145e+07	3.48083e+06	2.99026e+07	7.68687e+06	223344	1.58347e+07	1.16309e+07	4.37182e+06
0.919_403.2755		C21 H41 N O4 S	403.276	0.919						level5					2.30005e+07	2.00194e+07	2.2338e+07	2.15838e+07	2.06838e+07	2.14134e+07	2.13051e+07	2.20505e+07	1.93929e+07	2.29743e+07	2.19138e+07	2.27183e+07	3.78207e+07	2.79001e+07	4.52634e+07	7.07001e+07	4.51115e+07	6.90592e+07	3.16249e+07	2.7608e+07	3.31345e+07	1.24135e+08	1.86919e+08	5.79558e+07	8.65072e+07	6.09002e+07
0.921_104.0608	[similar to: safrole; δmass: -58.0072 da]		104.061	0.921						level5					1.51894e+06	1.47651e+06	1.58667e+06	2.40073e+06	1.61561e+06	1.19656e+06	2.22435e+06	2.01998e+06	1.13801e+06	1.37254e+06	2.18082e+06	1.70155e+06	2.05023e+06	2.47599e+06	2.18368e+06	3.06864e+06	3.26228e+06	2.72206e+06	1.35755e+06	2.55294e+06	2.68596e+06	9.22427e+06	1.41767e+06	1.48391e+06	3.91162e+06	1.56109e+06
0.921_314.1266		C17 H18 N2 O4	314.127	0.921						level5					2.22143e+06	1.48593e+06	1.61048e+06	1.61587e+06	2.44555e+06	1.69212e+06	2.46402e+06	1.98153e+06	2.25114e+06	1.09995e+06	2.1004e+06	802141	2.36614e+06	1.96927e+06	3.94412e+06	3.91826e+06	3.95837e+06	3.85943e+06	2.69438e+06	7.00707e+06	3.94412e+06	1.01812e+07	5.40803e+06	2.06926e+06	7.28689e+06	1.27106e+06
0.921_332.0796		C13 H21 N2 O2 P S2	332.08	0.921						level5					241831	284774	80186	233932	150967	220114	220232	186326	205754	142031	203759	80683.2	130155	105261	190388	85271	177055	2.28247e+06	900978	159807	1.6077e+06	101862	105595	110617	1.16547e+06	159707
0.921_376.2248	Resolvin d2	C22 H32 O5	376.225	0.921	C18179	S9558223				level4	FA Fatty acyls	FA04 Docosanoids	Null	NULL	7.98951e+06	7.88999e+06	8.10965e+06	1.03357e+07	8.20112e+06	8.46812e+06	9.08723e+06	7.41873e+06	1.02221e+07	7.49219e+06	8.5313e+06	1.96987e+07	4.1507e+06	7.50575e+06	5.51274e+06	3.4531e+06	5.01098e+06	1.19826e+07	6.74159e+06	5.00404e+06	8.80944e+06	5.2323e+07	6.02208e+07	2.02855e+07	8.94768e+06	3.58002e+07
0.923_261.1002		C14 H15 N O4	261.1	0.923						level5					3.95221e+06	3.40267e+06	3.66943e+06	3.59524e+06	3.51402e+06	3.76749e+06	3.81947e+06	3.33496e+06	3.89647e+06	3.5373e+06	3.68778e+06	267319	3.95317e+06	594899	1.5182e+06	173428	7.82617e+06	3.92845e+06	8.71299e+06	4.41107e+06	1.73676e+07	556872	183254	1.64193e+06	7.96341e+06	4.29222e+06
0.923_401.2598		C21 H39 N O4 S	401.26	0.923						level5					4.07574e+06	4.1621e+06	4.63822e+06	3.79527e+06	4.10254e+06	3.86815e+06	4.14835e+06	3.8321e+06	4.7569e+06	4.26467e+06	3.75749e+06	6.39196e+06	7.20578e+06	6.92919e+06	1.34091e+07	1.80064e+07	7.84246e+06	1.33161e+07	4.62212e+06	7.3183e+06	7.22431e+06	6.74293e+06	4.99672e+06	6.67045e+06	9.61127e+06	1.46439e+07
0.925_259.0878		C11 H17 N O4 S	259.088	0.925						level5					1.19808e+06	878896	1.11453e+06	1.32012e+06	1.0896e+06	1.16945e+06	1.05852e+06	1.29816e+06	1.19396e+06	1.02842e+06	1.00462e+06	332863	2.24292e+06	1.20734e+06	1.50593e+06	1.63919e+06	1.97089e+06	415293	901048	1.87493e+06	1.27224e+06	3.73838e+06	1.53775e+06	216422	1.82488e+06	1.01388e+06
0.927_172.1102	Oi1695000	C9 H16 O3	172.11	0.927		S15496	HMDB0040165			level4	Organic acids and derivatives	Keto acids and derivatives	Gamma-keto acids and derivatives		7.37991e+06	6.91345e+06	7.8841e+06	6.51828e+06	9.19812e+06	7.57397e+06	7.47166e+06	7.61642e+06	6.80688e+06	7.75185e+06	7.82124e+06	1.64248e+07	9.02657e+06	7.57898e+06	3.46178e+06	6.95609e+06	3.43877e+06	5.66491e+06	3.35677e+06	3.33569e+06	4.61922e+06	4.60195e+07	3.85085e+07	3.6339e+07	4.62396e+06	2.01817e+07
0.927_262.1106	Orange ot	C17 H14 N2 O	262.111	0.927	C19287	S13320130				level4				NULL	2.59456e+06	1.60587e+06	2.47826e+06	2.64998e+06	2.58996e+06	1.8632e+06	2.48122e+06	2.29941e+06	2.39766e+06	2.18197e+06	2.31508e+06	163117	1.73131e+06	211540	856598	183680	4.1854e+06	2.18262e+07	4.21161e+06	3.52955e+06	5.28183e+06	220945	180630	223494	1.4284e+07	2.98291e+06
0.927_305.1262	Zaleplon	C17 H15 N5 O	305.126	0.927	C07484	S5517	HMDB0015097			level4	Organoheterocyclic compounds	Diazines	Pyrimidines and pyrimidine derivatives	NULL	1.28904e+06	1.03032e+06	1.20683e+06	1.38888e+06	785355	1.08662e+06	1.33536e+06	1.12525e+06	1.17751e+06	971153	1.18248e+06	77889.3	288903	109112	107736	89758.4	5.1663e+06	1.04282e+07	5.28457e+06	939117	6.47023e+06	102577	101563	1.25126e+06	4.32975e+06	1.87752e+06
0.929_233.1264	Hopantenic acid	C10 H19 N O5	233.126	0.929		S26309				level4					1.31005e+06	1.09715e+06	911836	1.09656e+06	1.20778e+06	1.19297e+06	1.16537e+06	1.0599e+06	1.34899e+06	1.10911e+06	989950	1.12052e+06	4.26853e+06	1.1004e+06	2.19389e+06	3.38039e+06	1.76294e+06	822849	300089	1.8235e+06	1.00528e+06	1.17427e+06	645527	982884	676037	389211
0.929_439.3297		C25 H45 N O5	439.33	0.929						level5					1.83353e+07	2.18581e+07	1.69692e+07	2.03611e+07	1.6072e+07	2.08333e+07	1.89141e+07	1.79933e+07	1.9493e+07	1.7866e+07	1.95354e+07	3.17804e+07	4.36709e+07	3.83261e+07	3.1938e+07	5.73749e+07	3.24717e+07	2.45248e+07	2.04098e+07	2.90801e+07	2.72203e+07	4.07353e+07	3.81531e+07	5.40918e+07	3.15203e+07	2.27581e+07
0.93_136.0888	4329	C9 H12 O	136.089	0.93		S10248	HMDB0032544			level4	Benzenoids	Phenols	Cresols		1.4096e+07	1.4096e+07	1.4096e+07	1.4096e+07	1.4096e+07	1.4096e+07	1.4096e+07	1.4096e+07	1.4096e+07	1.4096e+07	1.4096e+07	2.47559e+07	2.17576e+08	3.65086e+07	1.28342e+07	6.00362e+07	5.76104e+07	1.93361e+08	4.31711e+06	2.65577e+07	4.83363e+06	1.87709e+08	1.20568e+07	7.19542e+07	5.14465e+06	2.34467e+08
0.93_234.1621	3138020	C15 H22 O2	234.162	0.93	C09743	S4945176	HMDB0030016			level4	Terpenoids	Sesquiterpenoids (C15)	Others	NULL	1.77927e+06	1.48589e+06	1.32558e+06	1.3043e+06	1.53292e+06	1.38607e+06	1.33598e+06	1.85322e+06	1.40619e+06	1.11175e+06	1.76717e+06	3.28365e+06	1.87904e+06	2.91881e+06	1.94583e+06	1.78592e+06	1.44819e+06	2.11339e+06	1.09231e+06	1.29087e+06	1.35319e+06	7.18177e+06	5.71939e+06	5.60227e+06	1.69316e+06	3.65274e+06
0.93_289.1312	2320	C16 H19 N O4	289.131	0.93		S4938664				level4					521776	529045	508868	579256	399179	503564	470765	559071	435686	598215	469659	112688	916227	338966	333169	191938	871631	3.12486e+06	1.35629e+06	664584	1.52776e+06	669923	1.61086e+06	167135	2.24569e+06	879079
0.93_347.267		C18 H37 N O5	347.267	0.93						level5					8.76391e+06	6.49957e+06	8.70283e+06	6.8759e+06	6.54577e+06	7.87427e+06	9.33848e+06	3.17272e+06	9.89467e+06	7.78673e+06	1.00465e+07	1.7806e+07	2.0692e+06	2.30669e+06	1.72987e+06	1.75575e+06	2.23337e+06	2.38989e+06	3.76674e+06	2.23575e+06	3.95103e+06	9.56286e+07	6.79019e+07	7.35189e+07	3.53493e+06	3.86474e+07
0.931_194.1059	6-hydroxypseudooxynicotine	C10 H14 N2 O2	194.106	0.931	C01297	S388576	HMDB0240264			level4	Organic oxygen compounds	Organooxygen compounds	Carbonyl compounds	map00760 Nicotinate and nicotinamide metabolism; map01100 Metabolic pathways;	860552	986279	739472	1.08558e+06	887119	906349	869172	945284	1.00242e+06	739706	968830	125848	2.1098e+06	233897	1.34699e+06	1.64435e+06	2.35081e+06	117641	663972	2.07065e+06	684656	4.4771e+06	2.65511e+06	162683	1.51736e+06	347222
0.931_203.0949	Indole-3-butyric acid	C12 H13 N O2	203.095	0.931	C11284	S8298	HMDB0002096			level4	Organoheterocyclic compounds	Indoles and derivatives	Indoles	NULL	1.17702e+06	978893	1.11691e+06	1.12034e+06	902367	1.11095e+06	1.03812e+06	1.25729e+06	993636	1.10388e+06	958575	373608	154444	204184	183320	177726	1.32206e+06	3.72049e+06	1.5797e+06	1.30646e+06	3.23611e+06	805951	670614	1.951e+06	3.41513e+06	2.3412e+06
0.931_338.2568		C19 H34 N2 O3	338.257	0.931						level5					229049	232675	160666	301616	272768	249152	172169	307655	238711	258858	182973	807008	338971	2.43031e+06	198270	169814	1.21262e+06	245213	128608	960207	198395	198558	229875	379155	180032	182233
0.931_383.2864			383.286	0.931						level5					2.16754e+06	1.90162e+06	2.00308e+06	2.49075e+06	2.24793e+06	2.00155e+06	2.25454e+06	2.10634e+06	2.10219e+06	2.11897e+06	2.17871e+06	4.20135e+06	5.34205e+06	1.22979e+07	7.86677e+06	9.22253e+06	8.34461e+06	4.30328e+06	2.48925e+06	8.14028e+06	589517	1.92515e+06	2.62617e+06	4.28275e+06	3.94606e+06	4.46736e+06
0.932_170.0944	2-(diethoxymethyl)furan	C9 H14 O3	170.094	0.932	C14280	S75385				level4				NULL	451417	385942	441436	270421	370555	361731	410974	286393	363993	367625	497832	638397	320949	554805	356385	503036	348247	650700	174077	327255	322712	2.00982e+06	2.20915e+06	1.78746e+06	187526	1.18617e+06
0.932_260.1194		C11 H20 N2 O3 S	260.119	0.932						level5					2.1106e+06	2.78377e+06	2.10318e+06	3.19906e+06	2.93686e+06	2.10401e+06	3.07561e+06	2.75648e+06	2.24068e+06	3.12404e+06	2.07829e+06	121287	2.4227e+07	2.71077e+06	4.01121e+06	6.52135e+06	1.34544e+07	787573	1.07717e+06	7.89927e+06	632064	5.42154e+06	146488	1.10258e+07	2.11445e+06	788373
0.932_598.4961		C35 H62 N6 O2	598.496	0.932						level5					1.24452e+06	1.32542e+06	1.47946e+06	1.52388e+06	1.42567e+06	1.12872e+06	2.44059e+06	1.24551e+06	1.31905e+06	1.08543e+06	1.63134e+06	601054	8.51825e+06	1.29836e+06	4.51553e+06	6.52957e+06	1.10316e+06	2.19581e+06	343799	4.30433e+06	3.61792e+06	7.73495e+06	8.37909e+06	2.02855e+06	6.62076e+06	2.26213e+06
0.934_194.0945	Butylparaben	C11 H14 O3	194.095	0.934		S6916	HMDB0032575			level4	Benzenoids	Benzene and substituted derivatives	Benzoic acids and derivatives		1.65021e+06	1.38036e+06	1.37104e+06	1.41108e+06	1.77504e+06	1.45432e+06	1.99641e+06	1.29444e+06	1.85181e+06	1.28314e+06	1.48988e+06	1.84094e+06	2.27001e+06	1.01608e+06	1.2619e+06	1.408e+06	1.18541e+06	1.40787e+06	1.90511e+06	1.45586e+06	1.3381e+06	5.72784e+06	6.30654e+06	8.56219e+06	1.18392e+06	4.17623e+06
0.934_269.1628	Rizatriptan	C15 H19 N5	269.163	0.934		S4900	HMDB0015088			level4	Organoheterocyclic compounds	Indoles and derivatives	Tryptamines and derivatives		601502	601502	601502	601502	601502	601502	601502	601502	601502	601502	601502	448785	251324	590666	505155	491899	1.39291e+06	288952	830757	1.09506e+06	2.87153e+06	1.20087e+06	1.65694e+06	432943	929582	935224
0.934_294.1035		C14 H18 N2 O3 S	294.103	0.934						level5					268818	219599	240168	307772	228417	271876	259420	249884	281066	280692	204722	80127	2.60121e+06	234284	618311	1.20517e+06	1.37011e+06	109899	132838	1.16159e+06	257243	525356	119218	397549	160823	89309.5
0.936_291.1106		C16 H21 N S2	291.111	0.936						level5					1.71311e+06	1.35759e+06	1.92522e+06	1.61819e+06	1.86783e+06	1.87138e+06	1.71125e+06	1.37183e+06	1.6498e+06	2.68251e+06	1.28174e+06	490168	3.25605e+06	1.32226e+06	1.74286e+06	2.55908e+06	1.07497e+07	1.77294e+06	1.26835e+06	7.62969e+06	2.05984e+06	7.81063e+06	2.05048e+06	1.39416e+06	3.89214e+06	2.01953e+06
0.937_419.1366	Jadomycin a	C24 H21 N O6	419.137	0.937	C18680	S28288204				level4					204004	154676	200694	246674	177479	225392	188802	169947	231977	181000	200985	87070.9	93122.9	148386	150367	123045	129798	3.64628e+06	314203	220649	385226	139220	148470	148702	348944	237698
0.938_169.0741	Pyridoxine	C8 H11 N O3	169.074	0.938	C00314	BGI489	HMDB0000239	6.2		level3	Vitamins and Cofactors	Vitamins	Water-soluble vitamins [Fig]	map00750 Vitamin B6 metabolism; map01100 Metabolic pathways;	480356	373012	330960	417101	383277	538277	356957	475001	329054	449805	388800	87958.1	228263	122065	135818	116345	453865	262401	534654	494634	1.79769e+06	1.33341e+06	710691	147192	346689	266254
0.938_367.1416		C21 H21 N O5	367.142	0.938						level5					469844	458817	481532	429179	451187	430456	508535	455698	514483	402587	450945	159362	368288	213510	197669	172193	451517	5.31258e+06	1.7495e+06	557721	1.98335e+06	201718	192480	221531	1.56759e+06	888528
0.939_350.1838	Disofenin	C18 H26 N2 O5	350.184	0.939		S150080				level4					585969	585969	585969	585969	585969	585969	585969	585969	585969	585969	585969	394319	1.52688e+06	913556	1.99819e+06	1.40331e+06	1.78266e+06	1.3578e+06	793644	1.8005e+06	932328	167919	209038	984618	705615	139775
0.94_353.1262	Protopine	C20 H19 N O5	353.126	0.94	C05189	MReference-564	HMDB0003920		51.9	level3	Alkaloids and derivatives	Protopine alkaloids	null	map01100 Metabolic pathways;	1.8015e+06	1.8015e+06	1.8015e+06	1.8015e+06	1.8015e+06	1.8015e+06	1.8015e+06	1.8015e+06	1.8015e+06	1.8015e+06	1.8015e+06	107020	264328	147841	178069	130286	4.63593e+06	2.29163e+07	9.238e+06	6.74284e+06	9.32916e+06	138059	172180	604461	5.81822e+06	2.5771e+06
0.941_304.1456		C15 H29 P S2	304.146	0.941						level5					1.43435e+06	1.251e+06	1.20655e+06	1.38953e+06	1.34745e+06	1.59164e+06	1.33893e+06	1.26739e+06	1.62501e+06	1.1672e+06	1.31241e+06	309108	3.7295e+06	369758	1.68262e+06	4.49081e+06	3.16237e+06	2.06716e+06	1.32685e+06	2.94215e+06	2.17647e+06	1.73398e+06	148274	1.12212e+06	1.27816e+06	952882
0.941_475.2759		C27 H41 N O4 S	475.276	0.941						level5					2.82761e+06	2.77484e+06	2.82986e+06	2.87422e+06	2.77605e+06	2.81625e+06	2.81718e+06	2.8212e+06	2.7261e+06	2.97487e+06	2.74921e+06	7.55994e+06	5.04367e+06	5.19153e+06	7.16295e+06	9.56379e+06	2.61407e+06	2.33277e+07	3.83168e+06	3.03228e+06	4.53798e+06	6.6536e+06	1.55642e+07	4.83979e+06	9.44652e+06	3.31222e+06
0.942_441.2365		C18 H41 N3 O3 P2 S	441.236	0.942						level5					382901	382901	382901	382901	382901	382901	382901	382901	382901	382901	382901	1.65485e+06	505749	355767	1.22634e+06	429717	367707	1.61527e+06	273787	157749	379267	3.25766e+06	1.68616e+07	8.07728e+06	1.86153e+06	717643
0.943_263.0795	Dimethylthiambutene	C14 H17 N S2	263.079	0.943		S10218	HMDB0061719			level4	Organoheterocyclic compounds	Heteroaromatic compounds	null		296021	296021	296021	296021	296021	296021	296021	296021	296021	296021	296021	80215.9	74233.3	96505.1	66652.9	75756.3	462574	2.63239e+06	808634	917357	810532	111734	71352.8	126513	462833	251857
0.944_251.0253		C11 H11 N O2 P2	251.025	0.944						level5					349142	332062	372186	400680	361034	357555	347530	393220	371414	305045	391477	66027.1	186311	80545.8	582858	83128.4	379760	2.19934e+06	618485	507851	805632	95481.7	112855	97546.1	800463	214508
0.944_272.1734		C13 H24 N2 O4	272.173	0.944						level5					696831	546494	531097	591911	691106	625199	615952	618097	685034	570832	568866	81879	1.93258e+06	249204	726479	2.23983e+06	1.5062e+06	728923	845164	1.4553e+06	539984	526000	116213	300804	259571	247014
0.944_334.1318		C18 H23 O4 P	334.132	0.944						level5					434771	434471	425298	442943	386802	451563	446955	345442	481403	362119	517703	83614.5	81128.2	108950	104614	91779.1	578899	3.59648e+06	984883	723162	880819	124826	116046	127446	1.48234e+06	265688
0.944_359.0826		C18 H17 N O5 S	359.083	0.944						level5					720925	582253	762170	854372	651421	719203	600241	868397	745406	606043	700950	71722.3	193956	91237.9	111732	89614.7	844729	7.55225e+06	3.18287e+06	879300	2.85248e+06	109410	126437	113765	2.20765e+06	767815
0.945_352.1421	Feruloylserotonin	C20 H20 N2 O4	352.142	0.945		S4766454	HMDB0032759			level4	Organoheterocyclic compounds	Indoles and derivatives	Tryptamines and derivatives		697186	680859	730006	638943	656623	686265	675555	709556	656827	692946	674999	202227	212081	291113	266249	245237	1.35604e+06	5.38234e+06	1.4426e+06	868205	1.17476e+06	332548	290913	329725	3.46237e+06	418167
0.946_389.2791		C19 H40 N3 O3 P	389.279	0.946						level5					2.28819e+06	3.25112e+06	2.552e+06	4.06236e+06	2.3906e+06	2.51133e+06	2.59819e+06	3.54681e+06	2.79004e+06	3.39603e+06	2.03555e+06	6.15694e+06	2.00425e+06	2.09301e+06	2.21394e+06	1.6042e+06	2.68678e+06	5.0398e+06	2.35683e+06	1.30321e+06	3.80489e+06	1.01423e+07	6.01994e+06	1.60795e+07	3.9902e+06	1.03981e+07
0.946_451.2756		C25 H41 N O4 S	451.276	0.946						level5					7.25853e+06	7.1657e+06	6.55763e+06	7.47133e+06	7.50539e+06	7.52302e+06	7.59858e+06	4.85942e+06	1.01401e+07	5.66511e+06	8.7653e+06	1.50592e+07	1.41825e+07	1.40124e+07	2.73452e+07	6.01695e+07	1.23346e+07	5.19162e+07	2.55682e+07	8.16123e+06	1.39641e+07	2.51046e+07	1.9054e+08	1.24362e+07	2.53059e+07	4.25174e+07
0.947_183.1262	Methyprylon	C10 H17 N O2	183.126	0.947		S4018	HMDB0015239			level4	Organoheterocyclic compounds	Piperidines	Piperidinones		703758	717443	767995	788501	671739	727455	729210	727957	786268	631882	779124	2.7205e+06	2.06703e+06	3.89325e+06	606381	908216	2.71083e+06	1.49254e+06	263796	2.75946e+06	718174	1.1249e+06	577824	800483	1.02758e+06	1.18508e+06
0.947_234.1257	Stiripentol	C14 H18 O3	234.126	0.947		S4470940				level4					800609	421474	565712	681700	387365	733686	614037	678932	526467	409831	682220	1.7123e+06	231945	263102	395749	276243	348500	312972	709295	415685	562202	3.86833e+06	4.13178e+06	5.11466e+06	466103	2.29506e+06
0.947_256.2151		C14 H28 N2 O2	256.215	0.947						level5					2.46859e+06	2.52386e+06	2.49639e+06	2.56011e+06	2.05661e+06	2.67197e+06	2.60275e+06	2.34949e+06	2.23938e+06	2.54467e+06	2.52973e+06	3.87828e+06	2.94906e+06	6.47235e+06	3.3395e+06	1.80442e+06	2.57569e+06	1.78995e+06	1.90756e+06	1.89751e+06	2.79585e+06	2.01731e+06	2.10297e+06	1.88044e+06	1.64917e+06	2.45664e+06
0.947_302.1839		C15 H30 N2 S2	302.184	0.947						level5					722938	723367	570467	611236	890869	774387	632628	945863	839482	574733	573791	89870.6	941527	528460	1.52041e+06	984241	2.51349e+06	1.05036e+06	741876	2.42911e+06	941680	133288	155615	650900	386040	110674
0.947_356.1987	Tampramine	C23 H24 N4	356.199	0.947		S49631				level4					855175	965135	947247	902961	1.03183e+06	866638	903219	990606	821077	950014	990178	3.3453e+06	388709	508771	289469	463737	316388	576219	630798	528544	977086	7.40489e+06	5.48094e+06	9.28834e+06	706911	5.763e+06
0.947_405.2725		C21 H35 N5 O3	405.272	0.947					69.8	level5					4.60345e+06	4.19487e+06	4.0919e+06	3.65051e+06	4.12263e+06	3.49205e+06	4.8735e+06	3.89858e+06	4.32919e+06	3.65807e+06	4.33856e+06	1.27198e+07	3.14632e+06	3.2678e+06	2.42385e+06	2.3414e+06	3.35082e+06	4.19098e+06	3.92191e+06	2.79063e+06	4.54224e+06	3.20146e+07	3.40146e+07	2.84629e+07	3.75517e+06	1.71761e+07
0.948_413.1263		C25 H19 N O5	413.126	0.948						level5					726171	679803	801286	765954	758132	703984	873133	736227	758169	717524	717740	105658	373261	135371	131939	113757	1.38613e+06	1.35418e+07	3.07921e+06	1.31395e+06	2.32365e+06	155279	147770	159579	1.78033e+06	948705
0.948_431.1372	Tiodazosin	C18 H21 N7 O4 S	431.137	0.948		S54869				level4					1.1058e+06	1.04621e+06	1.14353e+06	962316	1.12517e+06	1.06496e+06	1.08022e+06	978622	1.21484e+06	1.08234e+06	1.02501e+06	228336	490328	300500	305994	254264	1.58635e+06	2.19735e+07	5.31772e+06	2.95462e+06	4.17734e+06	343907	325430	349575	3.32551e+06	1.40844e+06
0.95_119.0735		C8 H9 N	119.073	0.95						level5					1.99884e+06	1.65537e+06	2.05131e+06	2.19565e+06	1.91279e+06	1.92798e+06	1.92134e+06	1.95112e+06	2.10545e+06	1.8164e+06	1.94947e+06	693839	4.72305e+06	1.0894e+06	3.42018e+06	8.18131e+06	4.97579e+06	3.38701e+06	1.88978e+06	6.9079e+06	2.13349e+06	4.57893e+06	3.29079e+06	1.95749e+06	2.19546e+06	1.92317e+06
0.95_212.1051	Guaietolin	C11 H16 O4	212.105	0.95		S62058				level4					462906	257069	370499	451338	277458	434137	295981	251391	504071	351216	373156	1.26978e+06	363588	296739	303387	330172	345761	375084	168941	270941	351330	2.08577e+06	2.338e+06	2.63836e+06	383770	1.62124e+06
0.95_387.262		C21 H33 N5 O2	387.262	0.95					52	level5					3.99949e+06	3.93319e+06	3.83107e+06	3.35897e+06	3.80464e+06	3.1561e+06	4.39491e+06	3.62675e+06	3.94228e+06	3.34746e+06	3.9568e+06	1.14515e+07	2.45384e+06	3.81912e+06	2.31045e+06	2.79349e+06	3.28242e+06	3.85447e+06	3.5663e+06	2.69132e+06	3.67645e+06	2.9353e+07	3.15932e+07	2.67842e+07	3.28947e+06	1.53542e+07
0.95_449.2597		C19 H40 N5 O3 P S	449.26	0.95						level5					916478	855595	713433	828328	668201	1.03552e+06	770376	955614	960682	592393	818886	2.6084e+06	555739	1.2311e+06	4.07373e+06	3.50255e+06	1.40821e+06	4.06933e+06	1.20046e+06	779701	1.14429e+06	2.59075e+06	5.86071e+06	754242	1.30078e+06	1.01145e+06
0.951_173.1055	N-acetyl-l-leucine	C8 H15 N O3	173.106	0.951	C02710	S64075	HMDB0011756			level4	Organic acids and derivatives	Carboxylic acids and derivatives	Amino acids, peptides, and analogues	NULL	3.78684e+06	3.20305e+06	3.48323e+06	3.8848e+06	3.31576e+06	4.23497e+06	3.3955e+06	4.09222e+06	3.67245e+06	3.03714e+06	3.64507e+06	2.67928e+06	7.77039e+06	2.63904e+06	4.98129e+06	1.08018e+07	5.65783e+06	3.80815e+06	3.51997e+06	5.49133e+06	3.00735e+06	8.52135e+06	1.86131e+06	2.64729e+06	2.56507e+06	3.16644e+06
0.951_324.2411		C18 H32 N2 O3	324.241	0.951						level5					1.2336e+06	1.02716e+06	1.2021e+06	1.18202e+06	1.12112e+06	1.20845e+06	1.16172e+06	1.14246e+06	1.14485e+06	1.18879e+06	1.1353e+06	5.28651e+06	1.43902e+06	7.26281e+06	1.02266e+06	2.16013e+06	3.58833e+06	2.15792e+06	1.68149e+06	3.91709e+06	3.72362e+06	1.02686e+06	2.75933e+06	1.4472e+06	2.02869e+06	1.16219e+06
0.951_371.2857		C21 H41 N O2 S	371.286	0.951						level5					2.20277e+06	1.79523e+06	1.8753e+06	1.71714e+06	2.07981e+06	2.04387e+06	2.41286e+06	1.41663e+06	2.15852e+06	1.89411e+06	2.11931e+06	2.35098e+06	5.0788e+06	1.49419e+07	1.25768e+07	8.05625e+06	4.96643e+06	8.11566e+06	4.98564e+06	9.46506e+06	5.77558e+06	2.8629e+06	2.90843e+06	4.0932e+06	5.82171e+06	4.11569e+06
0.951_415.2933		C23 H45 N O S2	415.293	0.951						level5					762972	509099	792437	504738	482130	987415	545617	762345	696848	452702	643416	1.18106e+06	284545	2.62058e+06	2.88443e+06	1.19152e+06	709631	936296	261190	281002	830531	3.52197e+06	4.42203e+06	2.20192e+06	960793	2.09672e+06
0.953_207.0898	N-acetyl-l-phenylalanine	C11 H13 N O3	207.09	0.953	C03519	BGI422	HMDB0000512	96.1		level1	Organic acids and derivatives	Carboxylic acids and derivatives	Amino acids, peptides, and analogues	map00360 Phenylalanine metabolism; map01100 Metabolic pathways;	6.31754e+06	6.65441e+06	6.17649e+06	7.02839e+06	5.90977e+06	7.23084e+06	6.36936e+06	6.47677e+06	6.44114e+06	6.31275e+06	6.56563e+06	7.74795e+06	1.62904e+07	6.30289e+06	8.34132e+06	2.25934e+07	1.28094e+07	7.5058e+06	5.9986e+06	1.29171e+07	6.2101e+06	2.26915e+07	1.03389e+07	1.47365e+07	9.39981e+06	5.33683e+06
0.953_255.1472	(6r,7s)-6,7-dihydroxy-8-methyl-8-azabicyclo[3.2.1]oct-3-yl (2e)-2-methyl-2-butenoate	C13 H21 N O4	255.147	0.953		S4445158				level4					1.12743e+06	1.44086e+06	1.13461e+06	888969	1.4717e+06	1.20364e+06	1.39075e+06	1.11178e+06	1.86252e+06	785443	1.19178e+06	965615	411082	1.28338e+06	778194	1.19599e+06	2.0836e+06	2.00754e+06	1.26457e+06	1.7433e+06	2.89145e+06	2.25129e+06	2.27983e+06	1.24611e+06	2.31026e+06	2.1301e+06
0.953_284.0684	Olmelin	C16 H12 O5	284.068	0.953	C00814	S4444068	HMDB0002338			level4	Phenylpropanoids and polyketides	Isoflavonoids	O-methylated isoflavonoids	map01100 Metabolic pathways;	3.14092e+06	3.59341e+06	3.49043e+06	3.72107e+06	3.64568e+06	3.01481e+06	3.52492e+06	3.50726e+06	3.14677e+06	3.4248e+06	3.82221e+06	2.62256e+06	2.0869e+06	298825	1.66671e+06	1.28554e+06	5.48271e+06	4.13891e+07	1.09435e+07	6.01508e+06	9.85833e+06	872877	315789	436437	7.63557e+06	4.60289e+06
0.953_369.27		C21 H39 N O2 S	369.27	0.953						level5					2.28496e+06	2.09753e+06	2.21127e+06	3.08166e+06	1.93898e+06	2.40538e+06	2.3325e+06	1.99037e+06	2.45557e+06	2.30636e+06	2.3865e+06	6.32123e+06	3.66131e+06	9.6068e+06	1.50762e+07	9.6963e+06	2.04406e+07	5.35328e+06	4.39085e+06	1.90426e+07	1.43574e+07	2.12255e+06	2.56514e+06	4.16072e+06	2.18097e+06	2.59936e+06
0.953_406.1991	11,11'-carbonylbis(7,11-diazatricyclo[7.3.1.0~2,7~]trideca-2,4-dien-6-one)	C23 H26 N4 O3	406.199	0.953	C10753	S3684041				level4	Alkaloids	Alkaloids derived from lysine	Quinolizidine alkaloids	NULL	164057	189432	173871	220265	233896	218572	157816	234308	187626	174428	201617	640169	276290	319632	321392	366849	339783	331702	207328	423157	498761	2.52997e+06	3.65565e+06	2.08651e+06	361540	1.01897e+06
0.954_266.0579	Phenanthrene-4,5-dicarboxylate	C16 H10 O4	266.058	0.954	C18252	S85790				level4					2.5865e+06	2.59805e+06	2.42212e+06	2.67992e+06	2.56462e+06	2.46892e+06	3.18687e+06	2.38607e+06	2.54939e+06	2.46637e+06	2.64594e+06	113706	742656	119990	133896	151008	3.62221e+06	3.52867e+07	9.35816e+06	4.50521e+06	8.41736e+06	137418	137145	248873	5.41835e+06	3.5251e+06
0.954_367.2544		C16 H38 Cl N5 S	367.254	0.954						level5					284638	321289	329173	271679	304420	285513	311825	290517	331808	289212	290699	269514	310707	1.19071e+06	922156	1.11153e+06	3.97893e+06	306061	1.25739e+06	3.35854e+06	3.26825e+06	535080	172585	571451	315457	521677
0.956_403.142		C24 H21 N O5	403.142	0.956						level5					1.08108e+06	963440	1.10288e+06	1.17567e+06	1.11089e+06	1.10229e+06	1.12667e+06	1.02352e+06	937134	1.18139e+06	1.16848e+06	86516.4	132499	110168	122022	94139.8	2.38597e+06	1.84654e+07	4.31806e+06	1.91403e+06	3.03504e+06	126242	124840	117114	2.02285e+06	1.28175e+06
0.957_271.1056	Deidaclin	C12 H17 N O6	271.106	0.957	C08329	S66273				level4	Amino acid related compounds	Cyanogenic glucosides	Cyanogenic glucosides derived from nonprotein amino acid	NULL	889668	922581	902362	888345	923399	914293	945309	829020	851291	1.00607e+06	913267	61924.4	1.52034e+06	675612	693356	1.67202e+06	1.60754e+06	428186	425451	1.75883e+06	944852	6.97421e+06	3.07792e+06	85376.7	1.48219e+06	423026
0.958_263.0946	?-naphthyl anthranilate	C17 H13 N O2	263.095	0.958		S56029	HMDB0039873			level4	Benzenoids	Naphthalenes	null		1.50464e+06	1.20611e+06	1.31139e+06	1.4067e+06	1.29902e+06	1.33104e+06	1.45237e+06	1.25544e+06	1.29462e+06	1.43312e+06	1.34403e+06	51895.2	230786	59186.7	71466.7	58212.8	2.63304e+06	1.65667e+07	4.76415e+06	2.24253e+06	4.62077e+06	68837.6	79893.6	312682	3.71605e+06	2.09685e+06
0.959_288.1682		C14 H28 N2 S2	288.168	0.959						level5					67630.8	42627.8	88191.3	72899.1	98503.6	72067.4	49783	100170	69549.7	65974.5	63269.1	39810.4	39402.6	44582.9	52432.3	43495	133376	47195.3	33927.1	177076	46674.7	51957.7	58377.6	142673	39809.9	44134.8
0.959_328.1422	Tyr-phe	C18 H20 N2 O4	328.142	0.959		S2665517	HMDB0029112			level4	Organic acids and derivatives	Carboxylic acids and derivatives	Amino acids, peptides, and analogues		98032.4	98032.4	98032.4	98032.4	98032.4	98032.4	98032.4	98032.4	98032.4	98032.4	98032.4	69251.5	2.99131e+07	172696	610304	279123	159619	63805.1	148940	53579.5	1.58883e+06	145092	248444	81970.6	928722	658279
0.959_381.1214	1,2,3,9,10-pentamethoxy-7h-dibenzo[de,g]quinolin-7-one	C21 H19 N O6	381.121	0.959		S251181	HMDB0033522			level4	Alkaloids and derivatives	Aporphines	null		96990	95694.7	117929	93682.5	129170	107878	88738.3	129903	101172	80335.8	126187	41242.7	40839.6	46226.4	47778.9	45115.5	239883	1.98543e+06	442106	277465	429771	53868	60615.8	50846.8	209687	156667
0.959_427.2573		C22 H37 N O7	427.257	0.959						level5					432165	414731	457500	480540	451365	443117	447145	366413	524274	451395	439889	1.59635e+06	238187	251953	234277	331691	144326	404942	408583	143938	182664	3.54409e+06	3.99555e+06	3.71382e+06	480017	1.88677e+06
0.96_343.2543		C19 H37 N O2 S	343.254	0.96						level5					4.27263e+06	5.72152e+06	5.28957e+06	4.56527e+06	7.03504e+06	6.27362e+06	4.66816e+06	5.44865e+06	5.59541e+06	5.49606e+06	4.88811e+06	5.40356e+06	1.56035e+07	3.15593e+07	2.76268e+07	2.76009e+07	2.24413e+07	2.24242e+07	7.99271e+06	2.86057e+07	1.62519e+07	2.30733e+07	1.21407e+07	1.67787e+07	1.29792e+07	7.60324e+06
0.96_452.1373		C28 H24 N2 S2	452.137	0.96						level5					131179	115387	150329	127061	140608	135194	144200	112267	128213	158457	125969	65017.1	94454.4	75978.9	86368.1	63395.2	170065	3.30567e+06	883061	222258	523512	87642.3	90221.7	84400.8	266368	64430.3
0.961_213.1004	(−)-(alpha)-kainic acid	C10 H15 N O4	213.1	0.961	C12819	S9837				level4				NULL	649898	806003	856318	1.27833e+06	610039	840718	843846	787179	944459	800390	714225	485694	695747	757431	1.6404e+06	726905	1.51206e+06	679976	788069	1.36414e+06	888651	3.96593e+06	6.91126e+06	644932	1.54407e+06	652195
0.961_381.147		C14 H28 N3 O5 P S	381.147	0.961						level5					1.01282e+07	7.59663e+06	8.72598e+06	9.51254e+06	8.90166e+06	9.84902e+06	9.48325e+06	8.54547e+06	8.91471e+06	8.68036e+06	9.49744e+06	2.0517e+07	3.6103e+07	3.06833e+07	3.47762e+07	4.07887e+07	2.72606e+07	2.05464e+07	1.37594e+07	2.1071e+07	1.87677e+07	2.83849e+07	3.36273e+07	2.0108e+07	2.4825e+07	2.15176e+07
0.962_339.1106	Mofezolac	C19 H17 N O5	339.111	0.962		S4089				level4					364941	337791	237193	342402	319689	424417	265684	350630	330116	286264	348243	70631	287426	120964	105668	133818	119953	6.23916e+06	1.31584e+06	198771	1.34954e+06	106011	146259	97486.4	992862	411273
0.963_507.3201		C24 H51 N3 O2 P2 S	507.32	0.963						level5					2.51861e+06	3.21933e+06	2.37581e+06	2.74667e+06	2.47359e+06	2.45585e+06	2.72385e+06	2.35046e+06	2.52324e+06	3.00468e+06	2.66803e+06	4.28319e+06	6.29832e+06	1.83903e+07	8.5971e+06	4.69975e+06	4.1897e+06	6.36336e+06	3.88662e+06	3.62001e+06	5.00972e+06	380960	311717	1.13405e+07	2.39798e+06	8.87119e+06
0.964_288.0898		C18 H12 N2 O2	288.09	0.964						level5					241743	239009	170565	265998	263127	228666	363913	178242	237046	203117	276778	37753.2	134147	42959.2	147483	42118.5	342542	2.31912e+06	429252	249004	625958	57345.4	51523.6	47494.4	1.0405e+06	181902
0.966_164.0839	Eugenol	C10 H12 O2	164.084	0.966	C10453	S13876103	HMDB0005809			level4	Benzenoids	Phenols	Methoxyphenols		554152	620452	637728	526889	623332	492456	521990	638568	511398	417052	890312	1.86587e+06	2.29591e+06	5.58466e+06	2.74089e+06	3.46373e+06	1.09627e+06	1.13595e+06	762462	922613	681795	1.80318e+06	990781	1.57585e+06	655608	4.48558e+06
0.966_209.0149		C9 H7 N O3 S	209.015	0.966						level5					1.41632e+06	1.14902e+06	1.26529e+06	1.47018e+06	1.37031e+06	1.38304e+06	1.27402e+06	1.5074e+06	1.3543e+06	1.14723e+06	1.37988e+06	3.84594e+06	164899	1.17975e+06	1.84387e+06	206312	1.7806e+06	465761	361069	1.39759e+06	357974	251688	207008	4.36412e+06	2.08215e+06	1.85557e+06
0.967_287.1734		C15 H29 N S2	287.173	0.967						level5					637247	959263	755550	749037	654959	768030	776387	709641	643418	805944	812500	1.5501e+06	771389	1.05344e+06	1.0217e+06	925089	1.04771e+06	1.3532e+06	2.09344e+06	2.16218e+06	2.88846e+06	1.17165e+06	1.41643e+06	1.57244e+06	832557	999932
0.967_290.1054		C18 H14 N2 O2	290.105	0.967						level5					310462	536018	383183	211951	310164	298230	385665	269319	448618	305842	323942	113847	462761	106945	204041	475170	802373	1.60847e+06	502593	95543.9	791067	53262.2	44726.5	49851.7	981233	125834
0.967_403.257		C21 H41 N O2 S2	403.257	0.967						level5					542728	426466	392271	492572	381226	550715	432011	405482	582736	471194	372761	1.72887e+06	237331	199919	95311.5	95889.1	105816	99826.6	162144	92882.8	232929	4.28294e+06	5.27855e+06	3.82799e+06	105736	2.32882e+06
0.967_409.2312		C18 H35 N O9	409.231	0.967						level5					9.89426e+06	8.6101e+06	8.81971e+06	1.02719e+07	7.65463e+06	9.07953e+06	9.78244e+06	8.39501e+06	9.33665e+06	9.18717e+06	8.9308e+06	2.34066e+07	2.99763e+07	5.27143e+07	6.79558e+06	3.04331e+07	1.10935e+07	5.12331e+06	6.65004e+06	8.62079e+06	1.55321e+07	1.65781e+07	2.64207e+07	8.87126e+06	3.64038e+07	1.34541e+07
0.967_891.5614		C60 H79 N O P2	891.561	0.967						level5					370559	501347	502358	434610	318485	421580	383788	390484	370731	371365	582283	78123.2	1.46622e+06	1.1836e+06	823031	2.33014e+06	1.11074e+06	392541	182690	1.61288e+06	913677	1.01928e+07	1.91214e+06	638302	1.74501e+06	707580
0.968_327.0928		C12 H26 N O P S3	327.093	0.968						level5					120668	88381.6	69874	122641	116558	102544	98474.7	78331.8	101380	88531.6	139934	34923.9	57382.8	49483.7	59337.8	42628.8	145265	1.41955e+06	469636	148877	418117	56199.8	53512.3	50249.9	666965	54715.1
0.968_386.2304	Oleandolide	C20 H34 O7	386.23	0.968	C11990	S20016206				level4	PK Polyketides	PK04 Macrolides and lactone polyketides	Null	map01100 Metabolic pathways;	810712	801968	658101	765673	536198	880419	782581	611114	917462	718754	639055	2.56616e+06	442828	439543	222671	225083	247602	235560	235429	249225	414552	6.97591e+06	7.87341e+06	6.17619e+06	243574	3.83126e+06
0.972_307.1056		C10 H22 N5 P S2	307.106	0.972						level5					179692	152500	220679	213440	250326	168396	230279	196528	220673	200114	166185	34347	51810.4	43950.7	51957.2	64152.5	364840	2.48314e+06	1.25137e+06	345121	523173	50111.5	72322.1	45565.7	370567	182580
0.973_391.2511	Fenretinide	C26 H33 N O2	391.251	0.973		S4450416				level4					1.40086e+06	946787	1.39324e+06	1.4786e+06	1.57783e+06	1.43639e+06	1.45056e+06	996176	1.52786e+06	1.46134e+06	1.31279e+06	37226.8	2.31419e+06	45147.1	2.72398e+06	64345.9	1.07358e+06	3.60139e+06	1.80456e+06	1.2196e+06	2.97607e+06	51783.4	67935.6	313139	4.61329e+06	1.59936e+06
0.974_311.1885	Dienogest	C20 H25 N O2	311.188	0.974		S62093				level4					395560	371634	364821	357198	396248	378832	419868	324361	430935	419277	327696	99098.3	157578	67632.8	56092.5	73157.7	416944	1.74511e+06	1.79247e+06	324597	1.2472e+06	92647.2	77133.8	250538	1.6582e+06	396241
0.977_380.137	Varespladib	C21 H20 N2 O5	380.137	0.977		S137248				level4					642805	518685	404753	384907	397788	561260	402386	530258	521768	409858	468822	283481	384939	355527	326095	379912	763233	4.25054e+06	2.07292e+06	582668	1.84973e+06	373765	360733	374623	2.00495e+06	341562
0.979_1023.5999		C60 H87 N3 O7 P2	1023.6	0.979						level5					103440	200086	166198	119583	133896	122858	116755	204385	107524	139995	140273	75551.2	147983	135355	124627	157891	464229	3.14474e+06	351814	274360	1.37059e+06	181451	141715	135177	2.1113e+06	350159
0.979_314.1267		C19 H23 P S	314.127	0.979						level5					492168	492168	492168	492168	492168	492168	492168	492168	492168	492168	492168	1.0101e+06	728419	801399	2.02346e+06	200135	641650	736799	1.38138e+06	1.34292e+06	4.10078e+06	445042	2.26723e+06	757324	2.48569e+06	107614
0.98_278.1137		C11 H14 N6 O3	278.114	0.98						level5					961019	853114	1.07683e+06	1.21943e+06	834351	1.23978e+06	898730	741122	1.08554e+06	1.13557e+06	1.01631e+06	29338.5	58543.5	49044.2	54585.3	54163.6	1.71097e+06	1.09041e+07	7.75086e+06	1.55142e+06	4.24202e+06	66835.7	60462.8	55105.7	3.58207e+06	999116
0.983_815.5416		C40 H83 N O11 P2	815.542	0.983						level5					968867	997242	1.04583e+06	1.24905e+06	1.06848e+06	1.01355e+06	1.08165e+06	1.0798e+06	1.2827e+06	831464	1.07873e+06	935908	2.78749e+06	1.68568e+06	3.39484e+06	2.5542e+06	2.00879e+06	3.06189e+06	640211	1.93809e+06	1.99259e+06	3.37242e+06	1.67899e+06	4.08025e+06	2.99764e+06	2.07891e+06
0.984_881.5879			881.588	0.984						level5					3.19205e+06	2.78204e+06	3.08481e+06	2.79539e+06	2.4789e+06	3.83982e+06	2.08119e+06	2.37979e+06	2.87976e+06	2.68129e+06	4.08724e+06	1.74538e+06	5.85846e+06	9.89209e+06	6.91174e+06	4.96477e+06	4.95594e+06	9.40661e+06	1.46719e+06	4.2057e+06	3.49532e+06	8.84569e+06	6.04188e+06	6.27317e+06	6.30569e+06	3.36605e+06
0.985_797.557		C48 H82 N O2 P3	797.557	0.985						level5					6.40708e+07	6.28331e+07	6.76023e+07	6.38112e+07	6.54169e+07	6.62991e+07	6.47673e+07	5.7073e+07	7.41468e+07	6.43667e+07	6.3422e+07	5.43224e+07	1.41223e+08	1.82986e+08	1.60605e+08	1.28764e+08	1.1271e+08	1.20864e+08	4.50849e+07	1.43451e+08	1.78739e+08	2.22433e+08	1.76279e+08	1.5475e+08	1.27451e+08	1.36716e+08
0.986_529.3567		C35 H47 N O3	529.357	0.986						level5					184124	198373	153883	184336	191121	181587	181530	181078	191104	169165	186306	324597	325146	443142	196719	362754	262028	3.01314e+06	924538	183968	564836	467528	244743	378893	694401	411375
0.986_835.6006		C42 H88 N5 O5 P3	835.601	0.986						level5					7.43149e+06	8.46074e+06	1.24524e+07	1.22329e+07	1.20204e+07	8.3665e+06	8.59207e+06	8.92375e+06	1.21147e+07	1.08047e+07	9.08028e+06	5.0801e+06	2.44708e+07	1.34113e+07	2.31807e+07	9.59739e+06	3.84102e+07	2.72195e+07	4.96688e+06	4.42584e+07	5.40907e+07	4.11357e+07	2.1795e+07	1.33123e+07	2.21379e+07	9.31715e+06
0.987_773.5585			773.558	0.987						level5					3.52373e+07	3.22734e+07	4.03932e+07	3.74742e+07	3.56973e+07	3.69732e+07	3.35555e+07	3.38727e+07	3.56186e+07	4.44011e+07	3.21302e+07	3.85694e+07	6.9223e+07	8.22064e+07	1.06216e+08	7.88887e+07	9.49523e+07	6.48559e+07	1.79063e+07	6.81516e+07	8.59868e+07	8.89002e+07	7.4842e+07	1.23557e+08	1.15041e+08	9.66197e+07
0.987_857.5879		C40 H84 N5 O12 P	857.588	0.987						level5					8.22593e+06	9.35471e+06	1.11533e+07	9.34034e+06	6.43832e+06	8.83957e+06	8.2164e+06	9.63064e+06	9.49548e+06	8.38818e+06	8.246e+06	5.21902e+06	1.62875e+07	1.1235e+07	2.14439e+07	1.39323e+07	2.71977e+07	2.01784e+07	3.72797e+06	1.47991e+07	2.31956e+07	2.80759e+07	2.32968e+07	1.64745e+07	1.93322e+07	1.50153e+07
0.988_554.2861	Acrovestone	C32 H42 O8	554.286	0.988	C09916	S140633				level4				NULL	565915	598102	619132	331314	568861	274087	593349	505108	412992	510866	612636	414303	511671	681323	452007	481164	631145	679880	1.54724e+06	1.43241e+06	533268	122364	442132	837520	345096	586444
0.988_766.5332			766.533	0.988						level5					4.26036e+06	4.26036e+06	4.26036e+06	4.26036e+06	4.26036e+06	4.26036e+06	4.26036e+06	4.26036e+06	4.26036e+06	4.26036e+06	4.26036e+06	5.81453e+06	2.1327e+07	6.169e+06	8.51571e+06	7.21379e+06	7.54319e+06	1.18123e+07	1.17534e+06	1.03617e+07	1.14872e+07	1.41902e+07	1.10254e+07	9.95344e+06	1.02076e+07	5.02331e+06
0.988_834.596		C44 H89 N2 O6 P3	834.596	0.988						level5					2.51264e+07	2.4737e+07	3.38018e+07	4.31592e+07	2.30295e+07	2.73383e+07	2.73343e+07	2.52154e+07	3.37713e+07	2.85465e+07	2.86882e+07	1.97452e+07	6.83151e+07	4.69177e+07	5.59778e+07	3.53728e+07	1.06153e+08	5.92278e+07	1.14711e+07	8.62795e+07	1.17469e+08	8.15682e+07	8.54447e+07	5.12717e+07	5.91039e+07	3.50396e+07
0.99_425.3143		C24 H43 N O5	425.314	0.99				85.6		level5					5.87959e+06	6.18235e+06	1.12003e+07	7.49769e+06	6.57017e+06	9.1518e+06	6.91573e+06	7.34661e+06	9.50779e+06	6.11237e+06	6.82115e+06	2.05082e+07	5.26056e+06	2.5879e+07	5.9186e+06	4.66103e+06	4.5107e+06	7.91155e+06	6.08644e+06	3.76436e+06	3.86656e+06	1.21413e+07	6.80959e+06	4.11767e+06	4.03798e+06	5.87867e+06
0.991_743.5462	Dioleoylphosphatidylethanolamine	C41 H78 N O8 P	743.546	0.991		S4743651				level4					1.78728e+07	1.63449e+07	1.70428e+07	2.4096e+07	1.93069e+07	1.77489e+07	1.863e+07	1.752e+07	2.07301e+07	1.78455e+07	1.83086e+07	1.63024e+07	3.90556e+07	2.14165e+07	6.43107e+07	5.66681e+07	4.21362e+07	2.24633e+07	6.66726e+06	4.14239e+07	4.72624e+07	3.55734e+07	4.33515e+07	2.92578e+07	5.15503e+07	3.65906e+07
0.991_821.5559		C36 H79 N5 O15	821.556	0.991						level5					634784	634784	634784	634784	634784	634784	634784	634784	634784	634784	634784	529771	1.05345e+06	748909	585630	887543	547137	2.86661e+06	632294	511909	900217	7.10415e+06	4.23847e+06	3.24493e+06	2.32663e+06	1.56311e+06
0.992_303.2925		C21 H37 N	303.293	0.992						level5					149791	190682	144893	274997	174368	182145	161740	221417	128641	182419	214135	515855	741353	436698	260899	575064	333851	286501	548702	239954	3.31721e+06	183890	275477	202508	255713	1.17811e+06
0.992_793.5579		C39 H81 N5 O7 P2	793.558	0.992						level5					2.90182e+06	3.12804e+06	3.14642e+06	3.45512e+06	2.44313e+06	3.10859e+06	3.0614e+06	2.89792e+06	3.37431e+06	2.68334e+06	3.09427e+06	3.34415e+06	8.69224e+06	5.93542e+06	8.7353e+06	9.21877e+06	3.93679e+06	8.10324e+06	1.07063e+06	3.49274e+06	4.98816e+06	7.39266e+06	9.35926e+06	8.55349e+06	7.12202e+06	5.97542e+06
0.994_331.3239		C23 H41 N	331.324	0.994						level5					322590	341814	371609	338832	321977	339256	339429	335959	359310	310819	351446	333843	2.76786e+06	993178	190969	538603	2.7324e+06	617260	7.48477e+06	4.21324e+06	1.71227e+07	261928	287115	406879	227725	1.24033e+06
0.994_369.3631			369.363	0.994						level5					427960	368974	406423	511743	322321	400240	431972	390008	414460	300502	525416	556760	889041	2.60984e+06	1.52963e+06	765191	525434	489921	259665	386485	206459	1.55023e+06	1.69521e+06	744350	862825	1.066e+06
0.996_533.4455		C33 H59 N O4	533.446	0.996						level5					4.70661e+06	4.70661e+06	4.70661e+06	4.70661e+06	4.70661e+06	4.70661e+06	4.70661e+06	4.70661e+06	4.70661e+06	4.70661e+06	4.70661e+06	6.10153e+06	8.06624e+06	2.0982e+07	1.34143e+07	9.02583e+06	7.96872e+06	1.47104e+07	8.59817e+06	9.54978e+06	9.21232e+06	1.0216e+07	8.20546e+06	1.44162e+07	7.01032e+06	1.26404e+07
0.996_557.3933		C24 H56 N5 O7 P	557.393	0.996						level5					779697	555570	878320	712385	695918	852916	570760	653642	706793	705294	869054	663669	866337	4.84638e+06	1.54028e+06	587748	445980	1.92849e+06	905964	379828	535108	187339	240398	1.38341e+06	488829	4.46401e+06
0.996_559.4089		C28 H60 N5 P3	559.409	0.996						level5					126711	273230	258668	231908	141144	207746	178615	187253	223024	178938	206043	301035	252008	2.02372e+06	280427	282779	266959	800838	274113	367888	413019	256758	414433	617547	329538	1.30212e+06
0.996_637.3613		C43 H48 N3 P	637.361	0.996						level5					425594	365772	432484	604051	366473	296359	433417	380416	440743	466781	402634	557886	687431	5.15665e+06	868937	291381	249119	893274	683503	240513	367406	201472	287939	966631	225500	1.39262e+06
0.996_756.549	[similar to: dl-dipalmitoylphosphatidylcholine; δmass: 22.9868 da]		756.549	0.996						level5					5.26989e+06	4.38264e+06	5.4117e+06	4.12766e+06	4.86159e+06	5.34086e+06	4.86693e+06	4.71812e+06	4.23649e+06	5.0609e+06	5.23488e+06	2.45456e+06	1.00958e+07	2.96751e+06	8.85907e+06	1.34224e+07	9.77853e+06	7.46096e+06	3.10746e+06	1.26132e+07	2.41902e+07	6.2546e+06	5.21894e+06	6.72824e+06	9.585e+06	8.0928e+06
0.996_760.5798			760.58	0.996						level5					1.3481e+07	1.09821e+07	1.41103e+07	1.4433e+07	1.1699e+07	1.2398e+07	1.35923e+07	1.24854e+07	1.45289e+07	1.32015e+07	1.12581e+07	8.18331e+06	3.64772e+07	1.34786e+07	2.30353e+07	1.89549e+07	3.19166e+07	2.77308e+07	1.91111e+06	5.05398e+07	4.7465e+07	1.70334e+07	2.95505e+07	1.61937e+07	3.23942e+07	1.26214e+07
0.997_359.3552		C25 H45 N	359.355	0.997						level5					289471	278995	289663	291987	287725	288015	285265	282859	312901	275880	280846	593503	947077	531409	487479	467592	1.13919e+06	609883	2.55173e+06	1.31612e+06	9.45153e+06	550483	592206	504881	503058	489716
0.997_455.4342		C28 H57 N O3	455.434	0.997						level5					2.09598e+07	1.73148e+07	1.61416e+07	1.77543e+07	1.79957e+07	2.10976e+07	1.65135e+07	1.77936e+07	1.61538e+07	1.95148e+07	1.96338e+07	2.98175e+07	6.09377e+07	8.72767e+07	8.80498e+07	6.79657e+07	5.64463e+07	8.20039e+07	9.01278e+06	4.9542e+07	5.42732e+07	8.45731e+07	5.69178e+07	8.17848e+07	6.20909e+07	7.66566e+07
0.997_555.3773		C31 H49 N5 O4	555.377	0.997						level5					834200	582896	804905	956934	671016	641978	773003	703078	871661	808821	644492	704439	473637	3.77404e+06	765756	182223	496840	1.83667e+06	1.0347e+06	572418	783298	174126	238674	1.54979e+06	251217	2.87844e+06
0.997_565.3617	(4r,5s,6s,7r,9r,11e,13e,15s,16r)-16-ethyl-4-hydroxy-5,9,13,15-tetramethyl-2,10-dioxo-7-(2-oxoethyl)oxacyclohexadeca-11,13-dien-6-yl 3,4,6-trideoxy-3-(dimethylamino)-beta-d-xylo-hexopyranoside	C31 H51 N O8	565.362	0.997		S8113479				level4					732463	765356	874175	780038	597981	971140	732090	630265	911130	958279	590279	968262	869812	5.26314e+06	2.05426e+06	1.37475e+06	762446	2.98753e+06	1.68423e+06	564628	1.65507e+06	430050	460433	1.79642e+06	395576	5.50653e+06
0.997_603.3777		C37 H54 N3 P S	603.378	0.997						level5					639729	749583	624409	804756	506842	645242	694097	703940	570111	669629	693698	717741	491275	1.04114e+07	1.12267e+06	386524	512509	1.42909e+06	988972	355572	434977	204489	210367	1.49419e+06	163324	2.88154e+06
0.998_413.3295	Solasodine	C27 H43 N O2	413.329	0.998	C10822	S391288	HMDB0035282			level4	Alkaloids	Alkaloids derived by amination reactions	Steroid alkaloids		5.62686e+06	5.11067e+06	4.71156e+06	6.08171e+06	5.1451e+06	5.3198e+06	5.31785e+06	5.26053e+06	5.39739e+06	5.36774e+06	5.23285e+06	9.05921e+06	6.32846e+06	3.8286e+07	2.24937e+07	1.00732e+07	1.15811e+07	9.3858e+06	1.49764e+07	7.91813e+06	7.45727e+06	1.97611e+07	2.9064e+07	1.35496e+07	1.33546e+07	1.28185e+07
0.998_508.2807		C27 H36 N6 O4	508.281	0.998						level5					1.06845e+06	871548	833249	907547	928816	940195	857048	840834	748443	1.33162e+06	861422	1.31505e+06	662275	704092	922801	786655	1.45934e+06	1.79757e+06	1.57855e+06	606456	1.12307e+06	1.02763e+06	3.70416e+06	558044	808280	940299
0.998_527.4924		C31 H66 N3 O P	527.492	0.998						level5					901326	987486	1.28759e+06	1.09574e+06	1.27278e+06	777312	1.14906e+06	1.12104e+06	781449	1.10075e+06	1.32388e+06	1.90365e+06	3.7021e+06	6.68538e+06	4.52062e+06	2.46069e+06	3.52249e+06	5.13584e+06	771821	2.7063e+06	5.14369e+06	4.80819e+06	3.30228e+06	3.55271e+06	2.98758e+06	7.68515e+06
0.998_531.3782		C32 H55 N O P2	531.378	0.998						level5					1.43943e+06	1.3304e+06	1.36355e+06	1.4558e+06	1.17604e+06	1.64272e+06	1.4147e+06	1.2342e+06	1.51027e+06	1.3165e+06	1.3766e+06	1.42974e+06	768238	1.26709e+07	2.03814e+06	1.01439e+06	1.17751e+06	3.23212e+06	1.99717e+06	1.69971e+06	1.45929e+06	932017	434349	7.80707e+06	902222	1.36659e+07
0.998_543.379		C28 H54 N3 O5 P	543.379	0.998						level5					991720	991720	991720	991720	991720	991720	991720	991720	991720	991720	991720	1.69097e+06	1.0426e+06	5.19305e+06	2.13695e+06	1.18896e+06	1.33857e+06	4.15524e+06	1.6411e+06	1.3301e+06	1.14685e+06	618785	820561	1.79128e+06	633629	7.45193e+06
0.998_589.362		C31 H54 N5 P3	589.362	0.998						level5					900541	1.07927e+06	991746	1.05171e+06	945698	1.11193e+06	929439	1.04738e+06	903753	1.07444e+06	991528	1.23768e+06	734008	6.28808e+06	1.39887e+06	261656	1.23894e+06	1.8028e+06	1.70005e+06	629856	1.02844e+06	281456	295016	2.90014e+06	289766	2.01058e+06
0.999_341.3294		C21 H43 N O2	341.329	0.999						level5					3.68011e+06	3.56763e+06	3.70855e+06	4.16223e+06	3.95047e+06	3.74084e+06	3.90268e+06	3.54832e+06	3.47072e+06	4.3803e+06	3.73575e+06	5.72253e+06	6.27126e+06	3.89266e+07	1.00106e+07	5.50658e+06	6.11912e+06	7.9264e+06	6.84854e+06	5.7151e+06	7.51819e+06	1.21435e+07	1.96524e+07	1.13216e+07	9.5248e+06	1.86531e+07
0.999_365.3294		C23 H43 N O2	365.329	0.999						level5					1.00174e+07	1.05431e+07	1.08455e+07	1.05331e+07	1.0434e+07	1.05908e+07	1.05143e+07	9.68616e+06	1.11188e+07	1.07834e+07	1.02047e+07	1.28497e+07	1.30402e+07	4.49185e+07	2.12521e+07	2.23817e+07	2.43341e+07	1.50129e+07	1.42332e+07	2.04319e+07	1.87816e+07	3.30821e+07	4.72479e+07	2.36127e+07	2.27831e+07	2.40463e+07
0.999_367.3451		C23 H45 N O2	367.345	0.999						level5					7.75965e+06	5.96695e+06	6.4788e+06	6.85965e+06	6.84577e+06	7.08238e+06	7.17129e+06	6.03891e+06	7.42856e+06	6.92299e+06	6.56734e+06	7.43396e+06	1.14507e+07	4.23977e+07	1.62514e+07	1.83816e+07	1.62797e+07	1.09741e+07	5.39946e+06	7.3535e+06	7.499e+06	1.23606e+07	2.07942e+07	1.22824e+07	1.10859e+07	1.69296e+07
0.999_369.3609		C23 H47 N O2	369.361	0.999						level5					796334	831177	659749	954957	691616	956194	787976	796605	570305	1.22768e+06	684729	1.08193e+06	2.02332e+06	1.24576e+07	2.58631e+06	1.21029e+06	1.66883e+06	1.8371e+06	983069	1.64461e+06	2.54048e+06	3.62537e+06	4.85727e+06	3.23849e+06	1.77343e+06	4.39343e+06
0.999_389.3304	(5z,8z,11z,14z)-n-(2-hydroxyethyl)-n-propyl-5,8,11,14-icosatetraenamide	C25 H43 N O2	389.33	0.999		S4446533				level4					3.29804e+06	3.13268e+06	3.42717e+06	3.56169e+06	3.17566e+06	3.36671e+06	3.28321e+06	3.37909e+06	2.82125e+06	3.77536e+06	3.35118e+06	4.82494e+06	3.93507e+06	1.45349e+07	1.30255e+07	4.61186e+06	7.33886e+06	5.05598e+06	6.65428e+06	3.22876e+06	4.31249e+06	9.909e+06	1.75249e+07	6.64559e+06	8.93076e+06	8.9291e+06
0.999_517.3621		C26 H52 N3 O5 P	517.362	0.999						level5					956094	479004	636533	323058	624304	691420	640080	714981	504111	516557	608716	628665	730400	6.84974e+06	1.07297e+06	473835	375691	1.63348e+06	1.63714e+06	376644	1.27509e+06	387733	450505	2.51222e+06	489218	3.07315e+06
1_311.3552		C21 H45 N	311.355	1						level5					248335	217046	224335	435861	229703	256694	245128	253806	258368	286637	243993	2.64419e+06	9.26193e+06	1.24319e+06	412713	672201	445229	1.87844e+06	285814	2.64928e+06	945760	486498	492307	1.18984e+07	4.38891e+07	1.90437e+06
1_451.3664		C21 H50 N5 O3 P	451.366	1						level5					385342	180654	265591	378587	245467	200737	332160	311123	258570	221679	314466	258559	217573	233739	179903	195069	7.88228e+06	208481	342743	6.56566e+06	255924	244300	210268	226951	180262	194703
1_997.5678		C59 H86 N O6 P3	997.568	1						level5					3.31379e+06	2.63133e+06	2.82061e+06	3.28233e+06	2.70683e+06	3.07959e+06	3.06538e+06	3.11566e+06	2.65288e+06	3.47816e+06	2.62662e+06	2.60534e+06	3.05251e+06	1.8173e+07	1.05405e+07	4.6331e+06	1.52842e+06	6.9752e+06	1.47779e+06	2.61071e+06	3.95496e+06	574403	1.35752e+06	6.17234e+06	1.50394e+06	8.74833e+06
1.001_257.272		C16 H35 N O	257.272	1.001						level5					731282	542887	771942	1.11916e+06	552116	635458	856335	836847	618107	688805	697832	3.42621e+06	1.6722e+06	3.14964e+06	1.00618e+06	2.4014e+06	920868	1.99395e+07	1.07317e+06	1.03953e+06	1.56009e+06	1.04999e+06	1.0773e+06	3.68087e+06	682293	1.60409e+06
1.001_285.3031		C18 H39 N O	285.303	1.001						level5					3.55148e+06	3.49002e+06	4.3985e+06	4.56352e+06	3.54273e+06	3.97965e+06	4.22807e+06	3.75793e+06	3.60068e+06	3.60488e+06	4.4175e+06	1.26147e+07	7.0326e+06	1.77957e+07	9.52567e+06	5.7387e+06	4.36783e+06	1.40521e+07	6.97749e+06	7.09394e+06	8.76115e+06	8.40689e+06	1.16762e+07	7.26413e+06	6.9373e+06	1.17522e+07
1.001_341.3657		C22 H47 N O	341.366	1.001						level5					2.48775e+06	2.01376e+06	1.9794e+06	2.43209e+06	2.20076e+06	2.4817e+06	2.39359e+06	2.01884e+06	1.90438e+06	2.19631e+06	2.7315e+06	4.07235e+06	4.53648e+06	1.11244e+07	7.21315e+06	4.92367e+06	3.72343e+06	6.40685e+06	4.44679e+06	4.27011e+06	5.36675e+06	6.20922e+06	6.16711e+06	5.61512e+06	4.22201e+06	6.4299e+06
1.001_761.5832		C39 H80 N5 O7 P	761.583	1.001						level5					4.57634e+06	6.0016e+06	5.48211e+06	4.83132e+06	3.84602e+06	4.7095e+06	5.99161e+06	3.94164e+06	6.70571e+06	4.06741e+06	4.95531e+06	3.73518e+06	1.04875e+07	5.87155e+06	6.87488e+06	4.66819e+06	1.09381e+07	1.06761e+07	496036	2.1859e+07	1.55359e+07	7.59144e+06	7.35784e+06	5.57928e+06	1.13376e+07	3.27793e+06
1.002_283.3239		C19 H41 N	283.324	1.002						level5					280165	258845	257776	272971	266205	339273	258398	270218	291614	251135	272276	2.4805e+06	4.09107e+06	536422	445276	434846	465619	876109	346605	1.03518e+06	719898	528629	548422	2.43224e+06	1.81159e+07	942965
1.002_309.2304		C18 H31 N O3	309.23	1.002					61.8	level5					2.97661e+06	2.65139e+06	2.25651e+06	2.1378e+06	1.81499e+06	2.37598e+06	1.96374e+06	2.6214e+06	2.5258e+06	1.41223e+06	3.58032e+06	7.06638e+06	3.09636e+06	3.10765e+06	1.39137e+06	1.33899e+06	1.76697e+06	3.13308e+06	3.11346e+06	1.49071e+06	3.48571e+06	2.08931e+07	1.76353e+07	3.36531e+06	3.20915e+06	9.94629e+06
1.002_949.5666			949.567	1.002						level5					3.14602e+06	2.91678e+06	3.17056e+06	2.74444e+06	3.19131e+06	3.0875e+06	3.03753e+06	3.0926e+06	2.87752e+06	2.5748e+06	3.65794e+06	2.90996e+06	3.84383e+06	3.69707e+06	8.34194e+06	6.35589e+06	6.58484e+06	5.89824e+06	770633	3.48488e+06	4.13419e+06	768059	602519	6.82031e+06	3.02017e+06	9.13265e+06
1.002_951.5825		C58 H81 N O10	951.582	1.002						level5					4.27352e+06	4.84599e+06	5.10185e+06	3.80507e+06	4.10196e+06	5.33039e+06	4.32014e+06	4.16282e+06	4.26921e+06	5.38298e+06	4.09461e+06	3.74979e+06	5.77641e+06	1.08365e+07	1.5686e+07	1.1854e+07	5.81104e+06	1.39816e+07	1.73455e+06	4.61483e+06	6.18779e+06	1.35332e+06	2.03778e+06	9.84243e+06	3.39715e+06	9.47959e+06
1.002_973.5679		C60 H79 N O10	973.568	1.002						level5					2.75038e+06	2.21303e+06	3.09324e+06	1.89414e+06	2.19709e+06	2.65748e+06	2.2319e+06	2.08702e+06	2.31928e+06	2.92209e+06	2.41114e+06	1.7555e+06	3.63078e+06	7.38635e+06	8.30246e+06	9.64215e+06	3.15356e+06	6.16884e+06	745269	2.36933e+06	4.01964e+06	1.1e+06	1.78853e+06	5.93844e+06	2.07583e+06	6.86001e+06
1.003_417.382		C24 H51 N O4	417.382	1.003						level5					1.226e+07	1.31953e+07	1.31304e+07	1.33795e+07	1.32266e+07	1.2889e+07	1.32464e+07	1.27263e+07	1.20635e+07	1.38767e+07	1.3217e+07	2.94959e+07	1.69895e+07	3.80054e+07	2.24899e+07	2.39283e+07	1.93657e+07	2.55823e+07	2.18682e+07	2.11758e+07	4.01798e+07	2.45103e+07	2.92512e+07	2.24906e+07	1.73569e+07	2.59745e+07
1.004_541.3623		C23 H52 N5 O7 P	541.362	1.004						level5					594178	515433	620280	575204	485683	733083	622900	442984	487495	873025	495358	789210	559302	2.07114e+06	412258	540329	665641	1.14212e+06	906535	416580	527086	273105	289401	903253	247871	1.86282e+06
1.004_927.5833			927.583	1.004						level5					4.1381e+06	3.88283e+06	4.10583e+06	3.65261e+06	4.27729e+06	4.00432e+06	4.01609e+06	4.01623e+06	3.94845e+06	3.93025e+06	4.11793e+06	3.47774e+06	3.93868e+06	3.3746e+06	1.09972e+07	4.48395e+06	6.94423e+06	6.87105e+06	1.15968e+06	5.58858e+06	4.60018e+06	615668	1.07755e+06	5.85064e+06	4.17147e+06	8.2047e+06
1.005_371.3396		C22 H45 N O3	371.34	1.005						level5					2.1536e+06	1.35341e+06	2.54728e+06	2.69968e+06	1.51015e+06	2.19856e+06	1.85475e+06	2.79741e+06	2.33645e+06	2.0799e+06	1.28835e+06	5.09533e+06	2.10315e+06	6.20119e+06	2.73528e+06	3.96189e+06	1.85897e+06	3.82096e+06	2.15478e+06	2.84226e+06	7.97545e+06	3.06302e+06	3.45759e+06	2.43295e+06	1.51983e+06	4.91471e+06
1.005_373.3556		C22 H47 N O3	373.356	1.005						level5					2.88432e+07	2.89907e+07	2.99003e+07	3.5301e+07	2.84358e+07	3.04973e+07	2.98667e+07	3.03654e+07	3.13131e+07	3.06899e+07	2.85563e+07	7.32932e+07	4.68235e+07	9.1762e+07	5.4506e+07	5.43455e+07	5.20322e+07	5.67928e+07	4.48245e+07	5.51292e+07	8.11425e+07	5.43981e+07	6.58599e+07	6.07685e+07	4.31284e+07	6.05782e+07
1.005_951.5791			951.579	1.005						level5					2.15667e+06	1.68915e+06	1.33376e+06	2.29365e+06	2.02953e+06	2.00238e+06	2.66656e+06	1.51264e+06	1.65993e+06	2.26763e+06	1.81894e+06	1.59671e+06	2.21285e+06	2.73438e+06	8.14e+06	3.60986e+06	2.77012e+06	8.98482e+06	602347	2.37914e+06	1.90109e+06	413455	468391	4.79677e+06	1.17724e+06	3.30585e+06
1.006_315.3137		C19 H41 N O2	315.314	1.006						level5					7.99711e+06	8.80732e+06	9.49186e+06	1.14049e+07	9.75222e+06	8.05937e+06	9.67668e+06	8.20624e+06	1.04263e+07	9.70255e+06	8.73812e+06	1.76518e+07	1.07554e+07	1.63131e+07	9.61674e+06	6.58032e+06	1.29053e+07	2.07453e+07	1.91885e+07	4.47157e+07	3.84335e+07	1.28331e+07	6.32082e+07	1.7087e+07	1.25677e+07	1.69493e+07
1.006_329.3294		C20 H43 N O2	329.329	1.006						level5					1.16022e+07	1.08346e+07	1.18805e+07	1.29475e+07	1.09511e+07	1.14985e+07	1.23034e+07	1.14587e+07	1.11734e+07	1.18578e+07	1.16734e+07	2.49446e+07	2.42478e+07	3.48458e+07	2.01112e+07	1.93726e+07	2.31889e+07	1.82061e+07	1.62485e+07	2.98406e+07	3.08157e+07	1.73636e+07	2.83663e+07	2.18276e+07	1.6507e+07	2.46995e+07
1.006_340.3455		C21 H44 N2 O	340.346	1.006						level5					311768	115536	294088	358271	230796	180736	234936	233132	286643	207897	241967	1.44897e+07	1.66907e+06	332461	230075	5.73859e+06	268924	2.55049e+06	134989	382323	244656	341315	259794	3.72851e+06	270171	764847
1.006_347.1887	3,8-dimethyl-3-(4-methyl-3-penten-1-yl)-3,11-dihydropyrano[3,2-a]carbazol-9-ol	C23 H25 N O2	347.189	1.006		S332791	HMDB0038828			level4	Organoheterocyclic compounds	Indoles and derivatives	Carbazoles		438640	219402	455036	444528	211668	352428	277704	320723	354305	310837	383912	520256	202006	229651	198935	201201	275932	2.2131e+06	1.33615e+06	213647	241084	1.56162e+06	1.42453e+06	2.39433e+06	498304	636782
1.006_389.3505		C23 H43 N5	389.351	1.006						level5					1.62194e+07	1.51757e+07	1.92202e+07	2.0883e+07	1.86356e+07	1.75364e+07	1.87836e+07	1.7735e+07	1.74802e+07	2.00116e+07	1.58469e+07	5.82172e+07	2.29124e+07	4.62379e+07	3.14284e+07	3.06392e+07	2.40293e+07	3.19556e+07	3.63704e+07	2.56432e+07	3.61476e+07	3.35517e+07	3.73045e+07	3.34952e+07	2.15042e+07	3.32922e+07
1.006_925.5679			925.568	1.006						level5					5.98174e+06	4.16134e+06	4.62421e+06	5.18686e+06	5.45882e+06	5.22487e+06	5.26017e+06	4.07902e+06	5.30479e+06	4.95678e+06	5.70822e+06	4.61773e+06	9.54503e+06	9.84344e+06	9.09544e+06	6.09673e+06	1.14707e+07	1.21098e+07	575339	8.09687e+06	1.35708e+07	1.6653e+06	1.4417e+06	5.60808e+06	6.81396e+06	1.29105e+07
1.007_345.3243		C20 H43 N O3	345.324	1.007						level5					7.56521e+07	7.27554e+07	7.51686e+07	8.12597e+07	7.14453e+07	7.5179e+07	7.51724e+07	7.61165e+07	7.39662e+07	7.35187e+07	7.72282e+07	2.51318e+08	1.11638e+08	2.27847e+08	1.25545e+08	1.57532e+08	1.02744e+08	1.53303e+08	1.30281e+08	1.08523e+08	1.55958e+08	1.72896e+08	1.42569e+08	1.5587e+08	9.21261e+07	1.5292e+08
1.007_433.377		C24 H51 N O5	433.377	1.007						level5					1.95615e+06	1.95983e+06	1.69586e+06	2.10824e+06	1.77782e+06	1.71541e+06	1.97346e+06	1.67022e+06	1.83407e+06	2.09265e+06	1.90931e+06	5.95237e+06	2.45235e+06	4.28382e+06	2.85175e+06	3.23963e+06	2.80965e+06	2.80992e+06	4.07448e+06	2.26901e+06	3.30629e+06	3.25819e+06	3.69266e+06	2.832e+06	1.90656e+06	3.07883e+06
1.007_539.3238		C24 H51 N3 O6 P2	539.324	1.007						level5					3.1975e+06	2.80472e+06	2.99539e+06	3.45937e+06	3.59225e+06	3.07898e+06	3.24317e+06	3.21522e+06	3.34209e+06	2.98758e+06	3.1618e+06	3.04796e+06	4.95968e+06	1.00256e+06	5.66161e+06	2.11015e+07	3.63261e+06	3.60845e+06	2.12369e+06	3.74045e+06	2.65738e+06	932143	3.01402e+06	2.00004e+06	2.85686e+06	1.54232e+06
1.007_695.4296		C31 H61 N5 O12	695.43	1.007						level5					433489	383861	400172	424423	414547	431171	404136	419976	454862	392458	389678	890266	734939	800142	694700	7.65205e+06	729140	701970	538391	703749	802130	832660	853769	765208	734970	8.14271e+07
1.008_441.3461	(4s)-4-{[(9z)-3-hydroxy-9-octadecenoyl]oxy}-4-(trimethylammonio)butanoate	C25 H47 N O5	441.346	1.008		S35032598				level4					1.17722e+07	1.56711e+07	1.33348e+07	1.40697e+07	1.24875e+07	1.44831e+07	1.35928e+07	1.3096e+07	1.50343e+07	1.36119e+07	1.21952e+07	1.91086e+07	2.2712e+07	1.26523e+07	3.18651e+07	4.54668e+07	4.19487e+07	2.03377e+07	1.83336e+07	3.80348e+07	2.44584e+07	2.10037e+07	3.36024e+07	2.95552e+07	1.82347e+07	1.8014e+07
1.008_739.4565		C35 H72 N3 O7 P3	739.457	1.008						level5					255465	226218	235830	250122	244301	254099	238166	247501	268060	231284	229646	512071	433115	471541	409402	814719	429698	413686	317285	414734	472713	490705	503145	450953	433134	2.88367e+07
1.009_464.2788			464.279	1.009						level5					399659	265590	278761	297681	292726	320179	374748	283052	297096	348705	277013	617641	609062	593226	498351	8.26635e+06	531498	508176	369622	464702	714522	615870	604664	556934	568554	517998
1.009_503.3045		C24 H47 N3 O4 P2	503.305	1.009						level5					8.90125e+07	8.90125e+07	8.90125e+07	8.90125e+07	8.90125e+07	8.90125e+07	8.90125e+07	8.90125e+07	8.90125e+07	8.90125e+07	8.90125e+07	1.43467e+08	1.67434e+08	1.25987e+08	1.54421e+08	1.77786e+08	1.06492e+08	1.44924e+08	1.05618e+08	1.26827e+08	1.1766e+08	1.32051e+08	1.35997e+08	2.38876e+08	1.69874e+08	1.08365e+08
1.009_523.2937		C22 H46 N5 O5 P S	523.294	1.009						level5					1.68848e+07	1.65304e+07	1.7364e+07	1.74974e+07	1.63862e+07	1.69235e+07	1.69511e+07	1.69477e+07	1.73799e+07	1.58052e+07	1.76202e+07	2.91609e+07	2.92785e+07	2.63937e+07	3.26682e+07	2.40093e+07	2.06827e+07	2.16068e+07	3.70348e+07	2.43595e+07	4.04114e+07	2.80829e+07	2.75143e+07	3.73708e+07	3.10716e+07	2.20935e+07
1.01_355.3449	Arachidoyl ethanolamide	C22 H45 N O2	355.345	1.01		S3015157				level4					1.73035e+07	1.958e+07	2.05095e+07	2.40706e+07	1.95336e+07	1.94095e+07	2.00676e+07	1.98684e+07	2.06294e+07	2.03161e+07	1.90486e+07	4.14275e+07	3.09488e+07	5.71305e+07	3.65954e+07	3.19373e+07	3.07307e+07	3.86672e+07	1.95014e+07	2.84543e+07	4.78102e+07	3.79998e+07	4.75075e+07	3.73595e+07	2.76438e+07	3.71135e+07
1.01_356.2286		C12 H33 N6 O4 P	356.229	1.01						level5					225438	199628	208111	220723	215587	224232	210173	218410	236553	204100	202654	451883	382208	416117	361281	553904	379192	365062	279992	365987	417151	433028	444006	397949	382224	1.64279e+07
1.01_361.3193		C21 H39 N5	361.319	1.01						level5					6.84845e+07	7.09813e+07	7.77396e+07	8.45793e+07	7.01546e+07	7.5417e+07	8.01686e+07	7.39805e+07	6.57008e+07	7.3875e+07	8.06249e+07	2.69212e+08	8.6738e+07	1.5896e+08	1.04322e+08	1.25465e+08	1.06007e+08	1.8712e+08	1.64419e+08	9.89081e+07	1.45977e+08	1.14913e+08	1.35367e+08	1.86765e+08	8.59626e+07	1.25212e+08
1.01_375.1835	Cyphenothrin	C24 H25 N O3	375.183	1.01	C12962	S35087				level4				NULL	1.03541e+06	706705	655188	454178	785924	961696	670592	903901	1.07502e+06	816043	380306	447252	409414	470480	450732	420001	791364	6.59411e+06	9.69353e+06	1.71056e+06	1.98245e+06	483526	558053	419930	483099	942254
1.01_405.3455	Hydrolyzed fumonisin b1	C22 H47 N O5	405.346	1.01	C19805	S19979682				level4				NULL	7.72446e+06	7.57447e+06	7.35805e+06	8.40585e+06	7.06654e+06	8.44114e+06	7.72855e+06	7.99549e+06	6.60736e+06	8.29212e+06	7.79964e+06	3.15682e+07	1.00636e+07	1.7802e+07	9.59912e+06	1.52944e+07	9.53066e+06	1.42292e+07	1.4803e+07	1.06412e+07	1.42184e+07	1.10828e+07	1.62544e+07	1.14667e+07	9.32868e+06	1.14182e+07
1.01_441.299		C26 H39 N3 O3	441.299	1.01						level5					662001	837203	567716	725229	800890	742803	765269	653070	652230	861284	668539	725965	1.07984e+06	2.50458e+06	1.58331e+06	1.04352e+06	592262	2.7226e+06	1.05942e+06	939686	1.10199e+06	4.28662e+06	5.24494e+06	885905	1.40691e+06	1.50192e+06
1.01_479.3038		C22 H47 N3 O4 P2	479.304	1.01						level5					3.99809e+07	5.02451e+07	4.64437e+07	4.63548e+07	4.25823e+07	4.73886e+07	4.57793e+07	4.19414e+07	4.80729e+07	4.68634e+07	4.30043e+07	6.60973e+07	9.21429e+07	3.43814e+07	8.83753e+07	1.08638e+08	7.97026e+07	6.56611e+07	7.47364e+07	8.56871e+07	8.14605e+07	6.33758e+07	7.07609e+07	9.32604e+07	7.79289e+07	5.09192e+07
1.01_651.4039		C29 H57 N5 O11	651.404	1.01						level5					545880	427583	448395	478360	469903	510674	479267	488940	524103	450400	445380	990380	857667	945680	822004	1.21659e+07	865511	812218	630229	813912	936530	981598	1.00739e+06	889327	864150	1.3593e+08
1.011_287.2825	Sphinganine (d17:0)	C17 H37 N O2	287.283	1.011		S2497508				level4					2.63785e+07	2.63785e+07	2.63785e+07	2.63785e+07	2.63785e+07	2.63785e+07	2.63785e+07	2.63785e+07	2.63785e+07	2.63785e+07	2.63785e+07	5.90832e+07	3.34387e+07	5.60349e+07	3.08656e+07	3.13416e+07	5.39482e+07	8.46492e+07	5.4438e+07	9.87234e+07	6.71835e+07	4.83729e+07	1.17983e+08	4.9013e+07	3.07349e+07	4.89929e+07
1.011_398.2391		C14 H35 N6 O5 P	398.239	1.011						level5					336551	298020	310684	329512	321844	334751	313762	326059	353144	304695	302537	674605	570589	621211	539349	1.19324e+07	566087	544993	417994	546374	622755	646457	662846	594089	595336	545207
1.011_417.2994		C22 H44 N O4 P	417.299	1.011						level5					741378	745862	851273	725311	776510	760855	763620	720701	891326	794339	676409	552168	888361	2.4421e+06	1.00924e+06	1.45533e+06	790897	1.70333e+06	848720	403116	991638	5.91798e+06	6.04667e+06	876633	1.5405e+06	2.049e+06
1.011_419.3154			419.315	1.011						level5					1.06854e+06	1.46314e+06	1.20295e+06	1.43832e+06	1.44598e+06	1.47563e+06	1.22147e+06	1.0443e+06	1.48495e+06	1.68235e+06	1.12207e+06	1.3392e+06	1.97622e+06	6.39203e+06	3.41311e+06	2.97105e+06	1.74293e+06	4.99535e+06	1.41615e+06	1.91776e+06	2.02216e+06	4.69693e+06	6.47268e+06	1.33552e+06	1.79773e+06	2.53927e+06
1.011_439.3075	N-arachidonoyl dopamine	C28 H41 N O3	439.308	1.011	C12271	S4445314				level4	FA Fatty acyls	FA08 Fatty amides	FA0802 N-acyl amines	map04080 Neuroactive ligand-receptor interaction; map04750 Inflammatory mediator regulation of TRP channels;	655312	820156	872187	1.11912e+06	864114	829397	841141	802774	848465	1.06252e+06	701808	744621	1.18768e+06	3.17904e+06	1.65008e+06	940672	1.09782e+06	3.32924e+06	1.36298e+06	1.26874e+06	1.24506e+06	2.89425e+06	4.6594e+06	1.14544e+06	1.4443e+06	1.73642e+06
1.011_465.3227		C23 H48 N O6 P	465.323	1.011						level5					1.86327e+06	1.93401e+06	1.82241e+06	2.43722e+06	2.02158e+06	1.68254e+06	2.33874e+06	1.63228e+06	1.88916e+06	2.1023e+06	2.15727e+06	1.3771e+06	2.22662e+06	9.13369e+06	3.26826e+06	1.84617e+06	7.55321e+06	6.05694e+06	1.98099e+06	8.99168e+06	2.60842e+06	2.2869e+06	5.04287e+06	3.84163e+06	2.0936e+06	2.91397e+06
1.012_243.2563		C15 H33 N O	243.256	1.012						level5					934676	1.05213e+06	987320	941857	1.0356e+06	879113	1.04339e+06	1.01632e+06	836584	1.0442e+06	1.03012e+06	2.37576e+06	1.61536e+06	1.74598e+06	1.40813e+06	945999	2.17066e+06	2.52469e+06	2.13737e+06	3.309e+06	2.95182e+06	956645	9.37851e+06	1.6098e+06	1.40297e+06	1.87941e+06
1.012_443.398		C26 H53 N O4	443.398	1.012						level5					1.90135e+07	2.1643e+07	2.27432e+07	2.23261e+07	1.944e+07	2.12614e+07	2.13805e+07	2.059e+07	1.90558e+07	2.15625e+07	2.24539e+07	2.82721e+07	3.13212e+07	7.69168e+07	2.48287e+07	3.48325e+07	5.99605e+07	3.6942e+07	5.61538e+07	8.78901e+07	5.58755e+07	3.43228e+07	3.59576e+07	4.08557e+07	4.36085e+07	3.24366e+07
1.012_453.286	Glycerophospho-n-palmitoyl ethanolamine	C21 H44 N O7 P	453.286	1.012		MReference-2955			63.5	level2					4.5187e+07	4.92881e+07	4.55004e+07	4.76269e+07	4.49167e+07	5.66531e+07	4.90087e+07	4.05469e+07	5.05446e+07	4.66209e+07	4.84821e+07	7.93148e+07	1.34458e+08	1.23863e+08	9.82454e+07	1.57108e+08	8.58956e+07	9.34244e+07	1.05648e+08	1.36008e+08	9.91088e+07	1.82076e+08	1.89895e+08	1.38593e+08	1.39262e+08	1.06731e+08
1.013_271.2514	1785113	C16 H33 N O2	271.251	1.013		S362214				level4					4.7078e+06	5.09197e+06	6.31297e+06	6.6731e+06	7.453e+06	4.26982e+06	8.7645e+06	7.3975e+06	3.96676e+06	6.4458e+06	5.41536e+06	1.5122e+07	1.2867e+07	1.98321e+07	1.82753e+07	1.12967e+07	1.16629e+07	1.0595e+07	1.05277e+07	1.0432e+07	1.46909e+07	1.28439e+07	1.23115e+07	1.90975e+07	1.0246e+07	1.58776e+07
1.013_381.1729		C18 H29 N3 O2 P2	381.173	1.013						level5					639634	492444	775682	775741	452430	683052	497392	684813	654974	548200	641941	424676	363410	395693	318149	334696	3.39754e+06	9.6676e+06	6.82171e+06	2.28103e+06	3.20049e+06	412185	383424	377803	2.8157e+06	441756
1.013_495.3359		C31 H45 N O4	495.336	1.013						level5					3.10133e+06	3.33678e+06	3.90203e+06	4.23553e+06	3.61975e+06	3.54784e+06	4.14674e+06	3.34762e+06	3.75884e+06	3.26913e+06	3.80562e+06	3.1189e+06	6.66511e+06	2.76818e+06	3.94571e+06	1.87609e+06	5.86356e+06	5.50467e+06	3.63417e+06	3.99933e+06	6.92285e+06	4.75263e+06	2.53548e+06	7.41097e+06	9.607e+06	4.9765e+06
1.014_185.2147		C12 H27 N	185.215	1.014						level5					1.61764e+06	1.56301e+06	2.42953e+06	2.28043e+06	2.1399e+06	1.26609e+06	1.68317e+06	2.1209e+06	1.11976e+06	2.81347e+06	2.09179e+06	1.05595e+07	5.65731e+06	1.50624e+07	7.781e+06	7.266e+06	8.20872e+06	8.21232e+06	8.30939e+06	5.94607e+06	1.23216e+07	9.24803e+06	8.25369e+06	7.93233e+06	6.89997e+06	9.75173e+06
1.014_307.2148	Betaxolol	C18 H29 N O3	307.215	1.014	C06849	S2279	HMDB0014341			level4	Benzenoids	Phenols	Tyrosols and derivatives	NULL	568419	887821	831256	893987	794624	847525	848732	732487	777052	1.02776e+06	618699	1.15291e+06	396308	434949	371080	372650	392632	376323	281247	359607	416981	9.24804e+06	4.83036e+06	6.14094e+06	952215	4.10333e+06
1.014_396.3367		C22 H45 N4 P	396.337	1.014						level5					2.08779e+06	2.03586e+06	2.29288e+06	2.42413e+06	1.83929e+06	2.23542e+06	2.26316e+06	1.98031e+06	2.22e+06	1.93632e+06	2.34275e+06	653959	1.32423e+06	3.44865e+06	2.15819e+06	2.34573e+06	7.85064e+06	2.09246e+06	8.02382e+06	8.62353e+06	1.27617e+07	8.94144e+06	1.80895e+07	1.11603e+06	1.12375e+06	2.65826e+06
1.014_481.3539	1-hexadecyllysophosphatidylcholine	C24 H52 N O6 P	481.354	1.014	C13903	S3845				level4	GP Glycerophospholipids	GP01 Glycerophosphocholines	GP0106 Monoalkylglycerophosphocholines	NULL	1.71852e+07	1.96301e+07	2.06579e+07	2.02007e+07	1.75503e+07	1.92934e+07	1.93786e+07	1.85807e+07	1.74742e+07	1.93083e+07	2.0361e+07	2.44008e+07	2.84649e+07	7.03311e+07	2.19989e+07	3.1692e+07	5.67966e+07	3.4233e+07	5.29101e+07	8.72944e+07	5.18846e+07	3.14019e+07	3.13587e+07	3.63875e+07	4.14594e+07	2.86895e+07
1.014_583.3281		C33 H51 N3 P2 S	583.328	1.014						level5					1.61984e+06	1.42519e+06	1.85018e+06	1.7766e+06	1.58101e+06	1.62583e+06	1.61177e+06	1.71218e+06	1.51393e+06	1.70599e+06	1.65046e+06	1.19502e+06	1.43142e+06	1.58757e+06	2.76064e+06	759218	2.333e+06	2.84951e+06	1.89936e+06	1.26316e+06	2.02825e+06	1.91224e+06	2.27689e+06	4.19042e+06	2.34298e+06	2.09508e+06
1.014_779.4515		C40 H66 N3 O10 P	779.452	1.014						level5					363366	321766	335439	355766	347488	361423	338761	352039	381282	328973	326642	728356	616052	670707	582323	4.36027e+06	611191	588416	451298	589907	672375	697966	715660	641424	616078	588647
1.015_355.3432	Iminoctadine	C18 H41 N7	355.343	1.015	C10997	S3406				level4				NULL	1.09563e+06	913072	1.05898e+06	1.00976e+06	1.11113e+06	908020	1.10365e+06	961090	697367	997340	1.5522e+06	916009	4.06511e+06	8.87349e+06	2.29192e+06	2.77255e+06	1.78726e+06	4.12016e+06	2.70822e+06	3.29349e+06	3.38951e+06	5.42671e+06	6.9e+06	2.86164e+06	5.04224e+06	2.68863e+06
1.015_607.3786		C27 H53 N5 O10	607.379	1.015						level5					468104	358398	376285	401917	395298	434719	408567	413858	442051	379397	374677	834180	726765	804438	700180	1.2587e+07	738041	686657	534532	687341	793548	834295	857126	752735	734203	2.83606e+08
1.016_229.2408		C14 H31 N O	229.241	1.016						level5					1.64811e+07	2.43366e+07	2.15193e+07	2.33557e+07	2.0971e+07	2.41404e+07	2.02532e+07	2.22064e+07	2.0091e+07	1.98072e+07	2.30123e+07	9.59868e+07	5.68524e+07	1.20252e+08	8.80191e+07	5.54514e+07	4.55813e+07	6.9191e+07	3.66161e+07	4.45932e+07	5.12266e+07	4.36723e+07	4.60204e+07	8.18063e+07	3.28311e+07	5.67085e+07
1.016_408.3356		C24 H44 N2 O3	408.336	1.016						level5					421642	413063	547358	477499	528002	417880	631344	539939	360475	543726	422859	410217	270499	1.31445e+06	742857	272542	321041	1.46666e+06	511861	328902	631378	3.6226e+06	9.60292e+06	463522	1.06683e+06	536230
1.017_394.3196		C17 H43 N6 O2 P	394.32	1.017						level5					1.009e+06	834164	885857	1.18191e+06	914131	845163	824158	1.09245e+06	818361	1.17291e+06	839027	514824	421637	1.24522e+06	1.18515e+06	1.55889e+06	2.94735e+06	1.45506e+06	1.11068e+06	1.86489e+06	1.91241e+06	9.45935e+06	1.06749e+07	536921	1.50463e+06	507533
1.018_370.3194		C21 H42 N2 O3	370.319	1.018						level5					534974	534974	534974	534974	534974	534974	534974	534974	534974	534974	534974	1.13408e+06	2.50468e+06	3.8042e+06	1.08405e+06	1.50269e+06	457550	2.92489e+06	467340	592822	806022	6.55151e+06	1.42504e+07	1.14902e+06	1.77783e+06	553202
1.019_303.2771			303.277	1.019						level5					1.32328e+06	1.32328e+06	1.32328e+06	1.32328e+06	1.32328e+06	1.32328e+06	1.32328e+06	1.32328e+06	1.32328e+06	1.32328e+06	1.32328e+06	9.19736e+06	4.25359e+06	5.50865e+06	4.70745e+06	3.21572e+06	3.82424e+06	8.03591e+06	2.81815e+06	3.16581e+06	2.98516e+06	4.13584e+06	6.1814e+06	4.76314e+06	2.60345e+06	5.9826e+06
1.02_448.1789		C29 H24 N2 O3	448.179	1.02						level5					456214	576477	430189	508674	455255	519639	494566	496409	559362	451452	444868	964300	855643	959060	847312	835085	893223	4.74743e+06	4.6045e+06	821326	953446	991817	1.03607e+06	883106	1.3593e+06	860471
1.022_582.3173		C34 H46 O8	582.317	1.022	C11978	S10128283				level4				map01100 Metabolic pathways;	2.26338e+06	2.08092e+06	1.73326e+06	1.49814e+06	2.44164e+06	1.64572e+06	1.84038e+06	2.40125e+06	2.26309e+06	1.26954e+06	2.28177e+06	1.37975e+06	2.39128e+06	4.73212e+06	3.42519e+06	1.48058e+06	2.48784e+06	2.58765e+06	1.9943e+06	3.13878e+06	2.75247e+06	2.43521e+06	2.03556e+06	4.70116e+06	1.82796e+06	2.1505e+06
1.022_687.3375		C33 H54 N O12 P	687.337	1.022						level5					1.67105e+07	1.67105e+07	1.67105e+07	1.67105e+07	1.67105e+07	1.67105e+07	1.67105e+07	1.67105e+07	1.67105e+07	1.67105e+07	1.67105e+07	2.6247e+07	4.05166e+07	3.57585e+07	3.95626e+07	2.95504e+07	2.10775e+07	2.7575e+07	1.96145e+07	2.19852e+07	2.71556e+07	4.72308e+06	6.84143e+06	4.52584e+07	2.66299e+07	2.32382e+07
1.023_333.2879		C18 H39 N O4	333.288	1.023						level5					1.82204e+07	1.88124e+07	1.40321e+07	1.85945e+07	1.52093e+07	1.72944e+07	1.70033e+07	1.75058e+07	1.71377e+07	1.58074e+07	1.74638e+07	4.23706e+07	2.26249e+07	3.49796e+07	3.28984e+07	3.90059e+07	2.48927e+07	2.88267e+07	3.71685e+07	2.87018e+07	2.89078e+07	2.68797e+07	3.39524e+07	3.21901e+07	2.17922e+07	2.75097e+07
1.023_377.3144		C21 H39 N5 O	377.314	1.023						level5					1.08787e+06	1.15528e+06	1.50705e+06	1.28145e+06	863238	1.18438e+06	1.44669e+06	1.03822e+06	1.11938e+06	1.46857e+06	991358	4.41669e+06	1.60356e+06	2.53429e+06	1.76228e+06	4.4967e+06	1.39903e+06	1.4558e+06	2.77661e+06	1.88687e+06	1.89544e+06	1.77941e+06	2.52166e+06	1.86343e+06	1.36855e+06	1.38145e+06
1.023_643.3698		C33 H60 N O5 P3	643.37	1.023						level5					4.58478e+06	4.01154e+06	4.18107e+06	3.60551e+06	3.70565e+06	4.27471e+06	4.13274e+06	3.79916e+06	4.31135e+06	3.72045e+06	4.28206e+06	3.79026e+06	4.47553e+06	1.49631e+07	1.27597e+07	4.16691e+06	4.6119e+06	7.40364e+06	3.02808e+06	5.7227e+06	4.98085e+06	1.06845e+06	5.59924e+06	4.37642e+06	4.65487e+06	4.25304e+06
1.023_663.3388		C39 H45 N5 O5	663.339	1.023						level5					3.69098e+06	3.92244e+06	4.40785e+06	4.02119e+06	4.3121e+06	3.76344e+06	4.44955e+06	3.79196e+06	4.0697e+06	4.08054e+06	4.02951e+06	5.10991e+06	1.03818e+07	3.74142e+06	9.7079e+06	8.7321e+06	6.84049e+06	4.45037e+06	4.01781e+06	5.23792e+06	6.864e+06	525699	1.84063e+06	8.51472e+06	5.15875e+06	3.77837e+06
1.024_641.3559		C28 H57 N3 O9 P2	641.356	1.024						level5					5.10468e+06	5.25167e+06	5.84749e+06	5.68005e+06	5.92012e+06	5.46476e+06	5.91122e+06	5.15549e+06	5.43806e+06	5.79986e+06	5.52181e+06	6.7603e+06	1.43015e+07	5.21629e+06	1.52602e+07	1.41997e+07	9.15581e+06	7.0825e+06	5.67968e+06	7.7839e+06	9.40797e+06	1.08448e+06	2.47201e+06	1.08571e+07	6.85999e+06	5.84837e+06
1.025_563.352		C28 H55 N O6 P2	563.352	1.025						level5					1.61816e+06	1.40301e+06	1.41762e+06	1.13271e+06	725927	1.39704e+06	1.18266e+06	1.23973e+06	1.39829e+06	1.29615e+06	1.1092e+06	3.5207e+06	3.5634e+06	1.99139e+07	4.00175e+06	4.82609e+07	1.65507e+06	8.84345e+06	2.29985e+06	817206	2.23278e+06	1.69727e+06	1.34242e+06	8.50573e+06	1.07866e+06	4.48705e+08
1.026_517.8126		C10 H O17 P3 S	517.813	1.026						level5					240615	213380	222772	236599	210018	240240	223131	231027	250000	215625	210673	485417	410895	446216	383113	1.08541e+07	402860	365459	296312	359298	441358	464724	470434	427935	404714	389007
1.027_615.3379		C27 H54 N O12 P	615.338	1.027						level5					7.22598e+06	8.3399e+06	7.84754e+06	7.74815e+06	7.41127e+06	7.85782e+06	8.47135e+06	7.40813e+06	7.42715e+06	8.22265e+06	7.52671e+06	1.25222e+07	1.9051e+07	2.82888e+07	2.29448e+07	1.80483e+07	1.16329e+07	1.44345e+07	1.44493e+07	1.70611e+07	1.91165e+07	2.54775e+06	1.00108e+07	1.47793e+07	1.58614e+07	1.49356e+07
1.027_639.3384		C29 H54 N O12 P	639.338	1.027						level5					1.62261e+06	1.63488e+06	1.60762e+06	1.64234e+06	1.6191e+06	1.62521e+06	1.62532e+06	1.62472e+06	1.62738e+06	1.62276e+06	1.62612e+06	2.19574e+06	3.87499e+06	1.34467e+06	3.06673e+06	3.68196e+06	3.58614e+06	2.06953e+06	1.97954e+06	2.56043e+06	3.90388e+06	628038	640890	3.59765e+06	2.19234e+06	2.04001e+06
1.027_687.4701		C34 H66 N5 O7 P	687.47	1.027						level5					1.08924e+06	681952	1.11216e+06	1.05203e+06	863208	939725	955870	965156	803010	1.10048e+06	926214	1.08963e+07	3.24636e+06	1.39084e+07	3.28141e+06	6.89392e+06	2.57685e+06	9.95739e+06	7.97632e+06	3.3445e+06	4.81159e+06	2.77406e+06	769808	7.5591e+06	1.54651e+06	3.68084e+06
1.031_289.2617		C16 H35 N O3	289.262	1.031						level5					1.2081e+08	9.30729e+07	9.11375e+07	1.08784e+08	8.8963e+07	1.01167e+08	1.02071e+08	1.06603e+08	9.73825e+07	9.06415e+07	1.08215e+08	2.80371e+08	1.35336e+08	2.16387e+08	1.93413e+08	2.1915e+08	1.79803e+08	1.85793e+08	1.96697e+08	1.47417e+08	1.91783e+08	1.66902e+08	1.71466e+08	1.88622e+08	1.26171e+08	1.48224e+08
1.031_495.298	3-{[(2-aminoethoxy)(hydroxy)phosphoryl]oxy}-2-(nonanoyloxy)propyl nonanoate	C23 H46 N O8 P	495.298	1.031		S7825934				level4					288503	255848	267109	283688	251816	288054	267539	277006	299756	258540	252602	582026	492673	535022	459361	1.86583e+07	483038	438193	355285	430806	511552	416593	564061	513104	485261	423778
1.036_397.1678		C26 H23 N O3	397.168	1.036						level5					1.06984e+07	1.05526e+07	1.23251e+07	9.8726e+06	1.07832e+07	1.22412e+07	1.07686e+07	1.21665e+07	9.1507e+06	1.1465e+07	1.11363e+07	564231	490849	541540	454461	464135	5.21085e+07	1.04565e+08	3.65527e+07	6.95092e+07	4.32594e+07	562255	551323	508611	3.41437e+07	1.05241e+07
1.04_326.0004		C8 H14 Cl N4 O2 P3	326	1.04						level5					1.2176e+06	868731	921772	1.46891e+06	867306	1.46708e+06	1.06459e+06	1.10059e+06	1.0413e+06	807383	1.35678e+06	4.09973e+06	6.89038e+06	1.91023e+07	3.27019e+07	1.889e+06	9.68595e+06	1.53976e+06	8.32246e+06	1.09874e+07	3.5264e+06	7.48739e+06	9.20667e+06	7.66005e+06	8.0868e+06	2.82277e+06
1.044_245.2356		C14 H31 N O2	245.236	1.044						level5					2.10944e+08	2.03477e+08	2.13559e+08	2.2468e+08	1.78955e+08	2.0795e+08	2.0599e+08	1.93415e+08	2.10797e+08	1.98229e+08	2.21253e+08	4.95351e+08	2.99758e+08	4.74663e+08	4.30978e+08	4.34754e+08	3.55801e+08	3.96023e+08	4.35693e+08	3.07546e+08	4.35892e+08	3.12943e+08	3.92683e+08	3.87555e+08	2.53489e+08	3.7066e+08
1.049_880.5771			880.577	1.049						level5					1.41215e+07	1.24877e+07	1.41694e+07	1.34285e+07	1.17509e+07	1.39444e+07	1.23703e+07	1.23336e+07	1.30638e+07	1.2095e+07	1.5721e+07	7.6805e+06	2.77595e+07	3.60264e+07	3.93318e+07	2.42564e+07	2.04275e+07	3.64374e+07	7.64227e+06	1.87113e+07	1.87505e+07	4.53249e+07	3.2188e+07	3.3821e+07	3.05844e+07	2.31142e+07
1.053_187.1939		C11 H25 N O	187.194	1.053						level5					465646	342262	442393	464580	357298	436934	429922	440580	447515	415943	358172	62437	63640.6	69769.1	62059.9	54241.3	68157.7	53913.8	42432.9	51655	85169.5	70484.4	66940	72778.9	77127.5	73000.6
1.053_448.1997	Obliquine	C26 H28 N2 O5	448.2	1.053	C12183	S391802				level4				NULL	286708	209462	233917	310240	241738	259395	255951	260739	181846	283591	302256	178584	218008	222634	247860	209841	1.41874e+06	3.37377e+06	6.64314e+06	732703	2.7891e+06	241544	317232	203605	1.27728e+06	461778
1.055_431.2877		C22 H41 N O7	431.288	1.055						level5					469988	423606	448656	482980	434674	451655	445769	441525	533942	440678	405617	1.01763e+06	697593	754815	586640	570137	670446	590749	393321	730544	801369	2.30528e+06	2.45181e+06	798106	707296	744519
1.058_431.2308		C25 H29 N5 O2	431.231	1.058						level5					1.18026e+08	1.82306e+08	2.17392e+08	1.75881e+08	1.00039e+08	1.62541e+08	9.89944e+07	1.75888e+08	1.38766e+08	1.71597e+08	1.55763e+08	5.61908e+08	1.09856e+08	5.02333e+08	2.50625e+08	2.46687e+08	2.20523e+08	2.50123e+08	3.73157e+08	2.94145e+08	2.51257e+08	3.50211e+08	1.49259e+08	1.9965e+08	2.01521e+08	3.39769e+08
1.058_433.2372			433.237	1.058						level5					9.15348e+06	8.60221e+06	6.67446e+06	6.26523e+06	4.78843e+06	8.54973e+06	6.45323e+06	6.87052e+06	7.36177e+06	7.26066e+06	7.11308e+06	1.77102e+07	6.38797e+06	1.70493e+07	2.20536e+07	1.331e+07	1.38554e+07	1.26536e+07	2.236e+07	2.27264e+07	1.83303e+07	1.1513e+07	8.94713e+06	1.04615e+07	1.29212e+07	1.05303e+07
1.058_475.2997	Netilmicin	C21 H41 N5 O7	475.3	1.058	C07657	S20152952	HMDB0015090			level4	Organic oxygen compounds	Organooxygen compounds	Carbohydrates and carbohydrate conjugates	NULL	1.70129e+07	1.38189e+07	1.56828e+07	1.60468e+07	1.43586e+07	1.74208e+07	1.56969e+07	1.44482e+07	1.55719e+07	1.60878e+07	1.54728e+07	2.3887e+07	3.67183e+07	1.70822e+07	3.63342e+07	5.52118e+07	3.25695e+07	2.3347e+07	1.58087e+07	2.81987e+07	2.79037e+07	2.64713e+07	3.06787e+07	2.64313e+07	2.76064e+07	3.31581e+08
1.058_836.5169		C45 H79 N2 O6 P3	836.517	1.058						level5					1.58347e+07	1.65081e+07	1.43864e+07	2.02845e+07	1.50032e+07	1.66129e+07	1.61603e+07	1.49762e+07	1.76098e+07	1.552e+07	1.69441e+07	1.32008e+07	2.99969e+07	6.25355e+07	4.25487e+07	3.26442e+07	1.74334e+07	3.11908e+07	1.18877e+07	2.01364e+07	2.47214e+07	5.44705e+07	4.49699e+07	5.54201e+07	2.72697e+07	4.33222e+07
1.059_371.2671			371.267	1.059						level5					3.76822e+06	3.45977e+06	3.43505e+06	3.81465e+06	3.78626e+06	3.5012e+06	3.73219e+06	3.65971e+06	3.91388e+06	2.98612e+06	4.06073e+06	4.74601e+06	4.78612e+06	1.11265e+07	1.36662e+06	5.25808e+06	2.51716e+06	7.962e+06	2.87852e+06	2.03407e+06	1.93665e+06	6.4058e+07	1.24256e+07	3.66303e+07	1.96053e+06	1.99218e+07
1.065_464.174		C29 H24 N2 O4	464.174	1.065						level5					5.73458e+06	8.47865e+06	7.10391e+06	7.09313e+06	3.94167e+06	6.45449e+06	6.15601e+06	6.40557e+06	5.32988e+06	5.37954e+06	8.69989e+06	951946	819913	897391	733796	763005	4.78638e+06	6.35931e+07	5.24335e+07	8.86746e+06	3.09427e+07	933582	886647	851281	1.18392e+07	8.02332e+06
1.067_854.5639	[similar to: α-aspartylphenylalanine; δmass: 574.4580 da]		854.564	1.067						level5					9.55525e+07	9.55525e+07	9.55525e+07	9.55525e+07	9.55525e+07	9.55525e+07	9.55525e+07	9.55525e+07	9.55525e+07	9.55525e+07	9.55525e+07	1.35204e+08	3.07144e+08	1.72461e+08	3.16096e+08	2.53681e+08	1.88867e+08	8.86778e+07	8.964e+07	1.51771e+08	1.91656e+08	2.62182e+08	1.9837e+08	3.44821e+08	3.31971e+08	1.65106e+08
1.068_403.1993		C22 H29 N O6	403.199	1.068						level5					7.03145e+07	6.42199e+07	6.43761e+07	8.19793e+07	5.47424e+07	6.86396e+07	5.93999e+07	6.25022e+07	6.28928e+07	5.83449e+07	8.77114e+07	2.78787e+08	4.7756e+07	2.30361e+08	1.48352e+08	1.48521e+08	1.19996e+08	1.486e+08	1.51151e+08	1.31345e+08	1.14292e+08	1.2456e+08	6.18912e+07	8.82331e+07	5.97348e+07	8.89605e+07
1.07_532.3192		C28 H45 N4 O4 P	532.319	1.07						level5					1.39792e+07	9.3512e+06	1.28515e+07	4.276e+06	8.56682e+06	1.03038e+07	8.51008e+06	1.07289e+07	1.14199e+07	6.27088e+06	1.03967e+07	2.90449e+06	1.75368e+07	2.2482e+07	1.92684e+06	3.96306e+07	6.85115e+06	1.48724e+07	5.26346e+06	3.93668e+06	207268	8.55276e+06	4.03297e+06	9.10011e+06	2.99775e+06	9.68884e+06
1.071_295.251		C18 H33 N O2	295.251	1.071						level5					1.00506e+07	1.14891e+07	1.13812e+07	1.1784e+07	8.42767e+06	9.87043e+06	1.07469e+07	1.00226e+07	1.04802e+07	1.19764e+07	9.76367e+06	3.29414e+07	1.61702e+07	2.01762e+07	8.4969e+06	1.26838e+07	2.52719e+07	1.98113e+07	1.62368e+07	1.64551e+07	1.68862e+07	1.58509e+07	1.78569e+07	1.105e+08	1.67005e+07	2.31871e+07
1.071_519.3265		C23 H45 N5 O8	519.327	1.071						level5					490217	399892	495852	529821	452318	611626	462125	477194	493839	509919	433004	927967	936273	711793	878551	785098	972801	796365	589349	707019	848602	782595	942002	677355	1.07848e+06	2.33875e+08
1.071_739.4565		C35 H72 N3 O7 P3	739.457	1.071						level5					295810	271350	327023	349410	300979	326314	315527	309701	316876	357939	255185	559026	687019	674704	545703	1.12476e+06	735657	557194	389767	511292	630182	686754	676827	643681	766227	1.53623e+07
1.071_812.518			812.518	1.071						level5					2.12516e+07	2.18667e+07	2.08713e+07	2.38311e+07	2.10567e+07	2.18935e+07	2.19787e+07	1.9699e+07	2.32008e+07	2.11078e+07	2.2655e+07	2.18502e+07	5.75132e+07	5.75598e+07	3.01403e+07	7.22986e+07	4.18071e+07	4.52766e+07	1.0799e+07	3.36913e+07	3.73123e+07	6.02545e+07	4.54274e+07	7.3729e+07	4.70679e+07	5.65103e+07
1.072_393.3241		C18 H44 N5 O2 P	393.324	1.072						level5					471376	627568	405137	382317	475697	457423	480413	529298	478917	323826	585374	386539	544956	1.1678e+06	393488	545682	450239	1.30041e+06	212982	536067	843566	7.40854e+06	6.68862e+06	503688	940443	510734
1.073_431.2732	Istamycin c1	C19 H37 N5 O6	431.273	1.073	C17996	S30791521				level4				NULL	1.60134e+06	1.9476e+06	812250	1.33602e+06	1.00659e+06	1.06101e+06	1.85372e+06	1.14327e+06	1.78906e+06	1.06507e+06	1.12332e+06	1.8539e+06	1.69527e+06	1.94648e+06	1.85967e+06	5.30577e+07	1.92535e+06	1.5713e+06	1.46368e+06	1.91449e+06	2.18268e+06	2.00088e+06	2.3015e+06	1.73918e+06	1.99154e+06	2.7291e+08
1.075_391.1784	S-hexyl-glutathione	C16 H29 N3 O6 S	391.178	1.075	C02886	BGI515		26.5		level3				NULL	3.04895e+07	2.99421e+07	3.87254e+07	3.52036e+07	3.62723e+07	2.48685e+07	3.36741e+07	3.65652e+07	2.59684e+07	3.09255e+07	4.1734e+07	360090	1.95992e+06	491795	375668	431806	5.4127e+07	4.489e+08	1.87625e+08	3.16882e+07	1.47374e+08	536449	452723	2.44652e+06	7.17525e+07	4.51288e+07
1.075_531.378		C27 H54 N3 O5 P	531.378	1.075						level5					971832	1.38352e+06	618219	1.38883e+06	737208	872746	1.04777e+06	872547	708309	1.27943e+06	1.05202e+06	1.02197e+06	1.65713e+06	2.16363e+07	2.30558e+06	1.50281e+06	2.20509e+06	3.90525e+06	3.18559e+06	1.15361e+06	3.39162e+06	1.07841e+06	1.3875e+06	1.06576e+07	1.19756e+06	1.61038e+06
1.076_305.2566		C16 H35 N O4	305.257	1.076						level5					2.04211e+07	1.46387e+07	1.68985e+07	1.56505e+07	1.57859e+07	1.65227e+07	1.69562e+07	1.50982e+07	1.69277e+07	1.74677e+07	1.68095e+07	4.5634e+07	2.37587e+07	3.03609e+07	3.11497e+07	3.1143e+07	2.52374e+07	2.01414e+07	2.81322e+07	2.68084e+07	3.3934e+07	2.82822e+07	3.12223e+07	2.35489e+07	2.45769e+07	2.70746e+07
1.076_522.3545	(7r,18z)-4,7-dihydroxy-n,n,n-trimethyl-10-oxo-3,5,9-trioxa-4-phosphaheptacos-18-en-1-aminium 4-oxide	C26 H53 N O7 P	522.355	1.076		S4473413				level4					4.81778e+07	4.81778e+07	4.81778e+07	4.81778e+07	4.81778e+07	4.81778e+07	4.81778e+07	4.81778e+07	4.81778e+07	4.81778e+07	4.81778e+07	4.2901e+07	1.09967e+08	2.10081e+07	8.20545e+07	8.23238e+07	6.92902e+07	4.56507e+07	6.99778e+07	9.86625e+07	1.05019e+08	4.16991e+07	5.33058e+07	2.93426e+07	1.06742e+08	3.15707e+07
1.077_425.1629	Domperidone	C22 H24 Cl N5 O2	425.163	1.077		S3039	HMDB0015315			level4	Organoheterocyclic compounds	Benzimidazoles	null		4.84368e+07	4.84368e+07	4.84368e+07	4.84368e+07	4.84368e+07	4.84368e+07	4.84368e+07	4.84368e+07	4.84368e+07	4.84368e+07	4.84368e+07	394109	2.85503e+06	580839	468582	409798	3.55483e+07	5.68531e+08	8.90834e+08	9.20133e+07	6.79272e+08	649919	816865	5.02153e+06	3.75864e+08	6.43546e+07
1.078_856.579			856.579	1.078						level5					2.66744e+07	2.61525e+07	2.87902e+07	1.71596e+07	2.6246e+07	2.61156e+07	2.49276e+07	2.27408e+07	2.55373e+07	2.35024e+07	2.71676e+07	1.61276e+07	7.46874e+07	4.20731e+07	7.82002e+07	6.57597e+07	5.20658e+07	6.78301e+07	1.24008e+07	4.90765e+07	3.98174e+07	7.36496e+07	3.90314e+07	6.8684e+07	5.71381e+07	3.98607e+07
1.079_378.1664	Cnicin	C20 H26 O7	378.166	1.079	C09362	S4444781				level4	Terpenoids	Sesquiterpenoids (C15)	Germacrenes	NULL	3.86592e+06	5.3335e+06	3.49088e+06	4.63842e+06	4.06255e+06	5.32016e+06	4.23644e+06	4.39241e+06	3.68991e+06	4.03018e+06	5.06103e+06	1.46126e+06	1.26827e+06	1.39665e+06	1.16503e+06	1.1948e+06	7.88111e+06	3.43755e+07	2.88851e+07	5.05427e+06	1.70265e+07	1.45075e+06	1.41203e+06	1.31477e+06	8.96219e+06	5.09122e+06
1.085_213.1731		C12 H23 N O2	213.173	1.085						level5					3.10357e+06	2.92448e+06	3.48529e+06	3.2799e+06	2.92661e+06	3.43082e+06	2.53654e+06	3.45458e+06	3.30225e+06	3.08101e+06	3.06054e+06	1.5689e+07	4.83278e+06	1.3799e+07	3.12344e+06	3.22095e+06	5.72714e+06	7.08944e+06	3.53942e+06	3.95281e+06	2.73823e+06	4.02876e+06	3.37186e+06	2.6416e+06	3.0329e+06	4.84842e+06
1.086_460.2658		C16 H40 N6 O7 S	460.266	1.086						level5					7.93693e+06	9.66825e+06	1.08661e+07	1.31638e+07	9.08175e+06	1.07787e+07	9.82884e+06	6.89132e+06	1.19436e+07	1.1434e+07	9.85239e+06	4.10106e+07	2.44433e+06	2.54921e+07	1.26537e+07	1.0821e+07	1.48634e+07	1.7228e+07	2.00081e+07	1.46351e+07	7.02626e+06	1.07681e+07	1.5085e+06	1.00505e+07	6.07544e+06	1.70971e+07
1.087_608.3807		C28 H56 N4 O8 S	608.381	1.087						level5					249573	244018	285393	333095	248596	263995	290890	256571	296581	257458	259744	514361	522410	523215	556175	8.06676e+06	560193	539149	395508	609524	629308	624677	603449	524910	672771	2.61582e+07
1.089_387.2469		C17 H33 N5 O5	387.247	1.089						level5					1.88813e+06	1.45681e+06	1.98222e+06	1.49044e+06	1.63494e+06	1.66189e+06	1.69007e+06	1.6713e+06	2.21364e+06	1.32049e+06	1.6576e+06	4.32206e+06	3.295e+06	3.60481e+06	1.18004e+06	3.42286e+07	1.24571e+06	1.04977e+06	893340	1.13858e+06	1.32357e+06	1.99821e+06	3.39527e+06	2.46012e+06	1.23137e+06	1.22277e+08
1.09_564.3555		C26 H54 N4 O5 P2	564.356	1.09						level5					1.82238e+06	1.43734e+06	1.4644e+06	1.15365e+06	1.6379e+06	1.41046e+06	1.45303e+06	1.30266e+06	1.87681e+06	1.48689e+06	1.35511e+06	2.3038e+06	2.37696e+06	1.22889e+07	3.3239e+06	1.59195e+07	2.09068e+06	5.53042e+06	2.08793e+06	1.8956e+06	2.20767e+06	2.34917e+06	2.41197e+06	7.00232e+06	2.0577e+06	6.44059e+07
1.092_369.2515		C20 H35 N O5	369.252	1.092					45.2	level5					1.78582e+06	1.71582e+06	1.65148e+06	1.44911e+06	1.6323e+06	1.63156e+06	1.53444e+06	1.67152e+06	1.83134e+06	1.4257e+06	1.74354e+06	6.10638e+06	1.05874e+06	3.00772e+06	2.34139e+06	1.77875e+06	945059	1.52276e+06	876586	644090	1.1585e+06	9.22753e+06	1.1478e+07	9.28973e+06	695326	3.94806e+06
1.092_764.5175			764.518	1.092						level5					2.90564e+07	4.07e+07	1.4813e+07	4.0656e+07	2.8802e+07	2.96303e+07	2.8547e+07	2.91708e+07	3.13397e+07	2.49753e+07	3.13109e+07	2.15082e+07	7.4888e+07	2.25723e+07	1.00362e+08	5.75007e+07	9.36876e+07	3.91621e+07	1.34858e+07	1.05143e+08	9.64991e+07	3.61287e+07	1.49083e+07	5.80804e+07	2.65576e+08	5.32659e+07
1.095_122.0106	[similar to: nicotinamide; δmass: -0.0374 da]		122.011	1.095						level5					2.39258e+06	2.39258e+06	2.39258e+06	2.39258e+06	2.39258e+06	2.39258e+06	2.39258e+06	2.39258e+06	2.39258e+06	2.39258e+06	2.39258e+06	6.75735e+06	2.65251e+07	7.74215e+06	3.21365e+06	3.02253e+06	1.27702e+06	6.81019e+06	2.51936e+06	1.49723e+06	6.60075e+06	7.35269e+06	786895	1.09879e+06	681554	1.90217e+06
1.095_261.2305		C14 H31 N O3	261.231	1.095						level5					1.07387e+08	7.49995e+07	9.53358e+07	7.95484e+07	8.1986e+07	7.95559e+07	9.06418e+07	8.12007e+07	9.12878e+07	8.9108e+07	8.57777e+07	1.28771e+08	1.29679e+08	1.68017e+08	1.76412e+08	1.20341e+08	1.38267e+08	9.22578e+07	1.63816e+08	1.44274e+08	1.56614e+08	1.20957e+08	1.40137e+08	1.30288e+08	1.11873e+08	1.40521e+08
1.095_603.3472		C26 H53 N O14	603.347	1.095						level5					1.05541e+06	943991	779987	1.0651e+06	718133	1.0188e+06	797721	849516	1.19399e+06	918483	782214	1.48011e+06	1.5273e+06	1.68934e+06	1.52633e+06	4.90213e+07	1.67376e+06	1.28763e+06	1.04296e+06	1.72852e+06	2.09226e+06	1.70309e+06	1.64687e+06	1.74243e+06	1.89708e+06	1.78762e+06
1.095_806.5649			806.565	1.095						level5					8.08544e+07	9.01825e+07	8.43556e+07	8.98969e+07	7.50567e+07	9.01381e+07	8.12062e+07	8.52495e+07	8.22639e+07	7.85964e+07	9.22418e+07	2.27838e+07	2.131e+08	4.8884e+07	2.78336e+08	1.52028e+08	2.68365e+08	1.10701e+08	5.66003e+07	5.0613e+08	2.3894e+07	1.87974e+07	2.82408e+07	1.21661e+08	4.46071e+08	1.40909e+08
1.097_377.1627		C23 H23 N O4	377.163	1.097						level5					2.92271e+07	2.10154e+07	2.02131e+07	2.40017e+07	2.38297e+07	2.36893e+07	2.42409e+07	2.28562e+07	2.27145e+07	2.83734e+07	2.06336e+07	378242	987494	303400	216024	249439	2.45551e+07	1.89819e+08	8.89949e+07	2.52584e+07	1.22501e+08	380999	245157	1.26713e+06	5.31714e+07	1.47326e+07
1.097_536.2532		C30 H36 N2 O7	536.253	1.097						level5					9.57179e+06	9.92027e+06	9.47023e+06	1.1179e+07	9.38024e+06	9.77876e+06	9.78033e+06	9.6449e+06	1.12446e+07	9.5482e+06	9.23759e+06	2.94904e+07	7.86306e+06	1.95098e+07	2.21654e+07	1.78164e+07	8.67403e+06	8.61487e+06	1.59753e+07	9.63163e+06	6.59194e+06	1.17542e+07	1.64885e+07	653368	5.47744e+06	2.54118e+07
1.099_134.0731	Cinnamyl alcohol	C9 H10 O	134.073	1.099	C02394	S21105870	HMDB0029698			level4	Phenylpropanoids and polyketides	Cinnamyl alcohols	null		4.73471e+06	2.86692e+06	5.85046e+06	6.14378e+06	5.01115e+06	4.58991e+06	5.0675e+06	3.43654e+06	5.32759e+06	4.96071e+06	4.97387e+06	1.05079e+07	4.55898e+06	1.16803e+07	3.778e+06	8.76745e+06	4.91846e+06	7.78158e+06	7.00334e+06	6.66811e+06	1.20251e+07	8.0411e+06	4.06722e+06	5.97527e+06	9.52345e+06	9.53346e+06
1.099_409.1349		C23 H23 N O4 S	409.135	1.099						level5					3.69064e+06	3.62864e+06	4.3733e+06	3.89149e+06	4.56715e+06	4.26328e+06	3.255e+06	4.2452e+06	3.68882e+06	4.2049e+06	4.17453e+06	265696	264297	269922	266284	267127	2.88859e+06	3.9253e+07	2.06618e+07	2.95998e+06	6.68361e+06	309564	278530	276371	6.16003e+06	4.49456e+06
1.099_508.2217		C27 H33 N4 O4 P	508.222	1.099						level5					4.52206e+06	4.526e+06	5.66794e+06	5.27988e+06	3.85281e+06	4.23206e+06	4.91883e+06	3.93661e+06	5.47004e+06	4.39394e+06	4.99964e+06	1.99149e+07	4.35021e+06	1.0112e+07	1.30037e+07	1.01856e+07	5.78656e+06	5.9332e+06	6.37344e+06	5.48972e+06	4.46702e+06	6.41366e+06	6.43659e+06	351400	543250	8.0057e+06
1.1_758.564	[similar to: dl-dipalmitoylphosphatidylcholine; δmass: 25.0019 da]		758.564	1.1						level5					6.6151e+07	6.54811e+07	6.79028e+07	8.04024e+07	5.86917e+07	1.00317e+08	5.92039e+07	7.19335e+07	7.75646e+07	6.41903e+07	6.54459e+07	2.54756e+07	3.14991e+08	5.58726e+07	1.30552e+08	1.55774e+08	1.87517e+08	9.80521e+07	3.33962e+07	4.12488e+08	2.7723e+08	1.51575e+08	1.67586e+08	1.1424e+08	5.2714e+08	9.45728e+06
1.102_194.131	Hexylresorcinol	C12 H18 O2	194.131	1.102		S21106121	HMDB0032567			level4	Benzenoids	Phenols	Benzenediols		530652	1.37613e+06	1.23524e+06	1.1595e+06	1.29141e+06	1.09884e+06	1.00148e+06	1.20309e+06	854520	1.20807e+06	987571	4.21368e+06	760579	1.1e+06	304043	455608	626708	348695	498709	664653	317209	7.29015e+06	5.25278e+06	6.54126e+06	783166	4.80543e+06
1.102_559.3207		C23 H50 N3 O10 P	559.321	1.102						level5					291543	281358	289619	282472	283380	282057	298788	278135	297160	270637	292226	564864	555934	562652	573718	4.02839e+07	575316	602045	422385	602859	659522	646657	539729	582696	619788	544644
1.103_524.3683		C24 H53 N4 O6 P	524.368	1.103						level5					4.66032e+07	4.66032e+07	4.66032e+07	4.66032e+07	4.66032e+07	4.66032e+07	4.66032e+07	4.66032e+07	4.66032e+07	4.66032e+07	4.66032e+07	5.54411e+07	1.57376e+08	9.84073e+07	1.23387e+08	7.49202e+07	9.82166e+07	1.11699e+08	1.05702e+08	1.5475e+08	1.28431e+08	1.68136e+08	1.73003e+08	1.36186e+08	2.0215e+08	1.35745e+07
1.107_810.5962		C42 H89 N2 O6 P3	810.596	1.107						level5					4.3174e+07	5.22826e+07	3.92236e+07	4.181e+07	5.62533e+07	4.15641e+07	5.87439e+07	4.3665e+07	4.93109e+07	4.33148e+07	4.32232e+07	1.42866e+07	1.15315e+08	6.1904e+07	1.66769e+08	1.70866e+08	1.96971e+08	1.07634e+08	1.08921e+07	1.82166e+08	7.60263e+07	1.58807e+08	1.41495e+07	1.24016e+08	2.093e+08	1.03685e+07
1.111_647.3729		C28 H57 N O15	647.373	1.111						level5					196686	190860	176826	193811	174200	194727	186134	175907	193992	182390	194733	343502	342143	337236	403184	2.42648e+07	411040	395230	277881	358453	423085	393313	382265	415941	456285	370599
1.113_834.596		C44 H89 N2 O6 P3	834.596	1.113						level5					1.51144e+07	1.95684e+07	1.45991e+07	1.93027e+07	1.87296e+07	1.5275e+07	1.89805e+07	1.727e+07	1.59044e+07	1.4547e+07	2.07443e+07	1.57458e+07	5.48267e+06	3.74551e+07	9.07944e+06	4.89109e+07	5.07763e+07	3.87612e+07	1.62459e+06	7.63717e+07	7.90912e+07	8.17962e+07	5.60709e+06	4.94843e+07	8.94024e+07	8.31356e+06
1.114_479.3037		C22 H47 N3 O4 P2	479.304	1.114						level5					9.04675e+06	3.73671e+06	9.26723e+06	7.78126e+06	9.76836e+06	7.51203e+06	7.34742e+06	7.99284e+06	6.69081e+06	9.68686e+06	6.01172e+06	1.34377e+07	2.78138e+07	8.93474e+06	1.51881e+07	5.72645e+06	2.69544e+07	9.01411e+06	4.57429e+06	1.96504e+07	2.02923e+07	1.34099e+07	1.21874e+07	9.08788e+06	2.03472e+07	1.09226e+07
1.117_373.3556		C22 H47 N O3	373.356	1.117						level5					1.92168e+07	1.09116e+07	9.39269e+06	1.12323e+07	9.38978e+06	1.27202e+07	1.42311e+07	9.21847e+06	1.3331e+07	1.16614e+07	1.22382e+07	1.809e+07	2.52404e+07	3.4133e+07	2.46847e+07	4.10282e+07	2.82617e+07	2.27281e+07	2.1779e+07	2.07925e+07	2.64519e+07	2.01598e+07	1.76017e+07	2.61824e+07	2.89148e+07	2.10893e+07
1.119_471.2684		C20 H41 N O11	471.268	1.119						level5					377579	341854	338953	347610	312648	379570	369891	323322	356299	335219	358148	616925	720213	751621	795480	3.25902e+07	804874	768001	557389	762798	774961	857360	738742	749055	902077	758603
1.12_329.3293		C20 H43 N O2	329.329	1.12						level5					6.82671e+06	4.9685e+06	4.54063e+06	5.68775e+06	4.60587e+06	6.34942e+06	6.56703e+06	4.00327e+06	6.40587e+06	4.62704e+06	6.08805e+06	5.4613e+06	1.58314e+07	1.69552e+07	8.83179e+06	1.29143e+07	1.2343e+07	1.22624e+07	9.56003e+06	9.59517e+06	1.37763e+07	7.37188e+06	1.09371e+07	1.2301e+07	7.31853e+06	9.02774e+06
1.122_217.2044		C12 H27 N O2	217.204	1.122						level5					1.40854e+08	1.40854e+08	1.40854e+08	1.40854e+08	1.40854e+08	1.40854e+08	1.40854e+08	1.40854e+08	1.40854e+08	1.40854e+08	1.40854e+08	3.18834e+08	2.40651e+08	3.72422e+08	2.52374e+08	2.29939e+08	2.49286e+08	2.03537e+08	2.72084e+08	2.44789e+08	1.89481e+08	2.31313e+08	2.38559e+08	2.32148e+08	1.86734e+08	2.65993e+08
1.122_315.3138		C19 H41 N O2	315.314	1.122						level5					5.4382e+06	3.70719e+06	3.8684e+06	4.02649e+06	3.67335e+06	6.13164e+06	4.75755e+06	3.17904e+06	6.16742e+06	3.58935e+06	4.09192e+06	4.0942e+06	5.14203e+06	5.54967e+06	4.66257e+06	4.68549e+06	6.60396e+06	6.37381e+06	5.76964e+06	1.19134e+07	2.06307e+07	4.32534e+06	1.77268e+07	7.20127e+06	9.64911e+06	6.48716e+06
1.125_389.3506		C23 H43 N5	389.351	1.125						level5					6.24664e+06	5.92943e+06	5.96023e+06	6.49966e+06	5.75101e+06	6.12889e+06	6.13326e+06	6.09094e+06	5.36853e+06	6.8254e+06	6.06831e+06	1.68886e+07	1.02634e+07	1.10565e+07	1.44192e+07	1.91878e+07	1.25976e+07	1.03837e+07	1.12816e+07	7.84491e+06	2.00563e+07	1.07994e+07	1.02206e+07	1.44114e+07	1.03654e+07	1.07859e+07
1.125_427.242		C22 H39 N O3 P2	427.242	1.125						level5					314032	284191	263354	288715	259560	290869	303575	264685	291286	273928	292533	511938	510491	503626	603888	1.46243e+07	615237	589432	416777	623895	634703	646365	572816	726202	684044	554329
1.128_345.3243		C20 H43 N O3	345.324	1.128						level5					3.08216e+07	3.08216e+07	3.08216e+07	3.08216e+07	3.08216e+07	3.08216e+07	3.08216e+07	3.08216e+07	3.08216e+07	3.08216e+07	3.08216e+07	1.36103e+08	1.23293e+08	1.17499e+08	4.64561e+07	9.34917e+07	3.6506e+07	1.30606e+08	6.68166e+07	3.53744e+07	8.54908e+07	8.18337e+07	4.25614e+07	8.28434e+07	4.7244e+07	3.86269e+07
1.128_760.5798		C39 H83 N6 O2 P3	760.58	1.128						level5					1.89966e+07	1.7665e+07	1.23602e+07	2.28566e+07	1.94499e+07	1.71358e+07	1.76669e+07	1.77876e+07	2.31129e+07	1.57709e+07	1.58662e+07	8.66587e+06	6.86495e+07	2.07211e+07	4.37187e+07	5.86739e+07	6.31152e+07	4.17597e+07	4.97738e+06	1.0063e+08	7.11068e+07	3.73586e+07	4.44143e+07	2.86349e+07	9.21892e+07	2.56397e+07
1.129_299.1944		C13 H25 N5 O3	299.194	1.129						level5					1.05563e+06	1.0556e+06	1.23385e+06	410956	1.30021e+06	990306	1.02843e+06	843651	861409	993171	1.05513e+06	2.68805e+06	2.94479e+06	3.23743e+06	244965	7.94922e+06	661036	1.15953e+06	1.68727e+06	883712	1.03279e+06	268967	291476	1.98285e+06	628692	1.98096e+07
1.129_410.1717	Mangostin	C24 H26 O6	410.172	1.129	C10080	S4444969	HMDB0035796			level4	Organoheterocyclic compounds	Benzopyrans	1-benzopyrans	NULL	537182	625096	355031	747582	612575	494292	600480	468208	592316	528156	603476	691114	705827	689853	663463	677387	3.04879e+06	7.78222e+06	5.5525e+06	2.42064e+06	3.71392e+06	828866	691265	713278	1.078e+06	681952
1.13_225.0461		C10 H11 N O3 S	225.046	1.13						level5					9.93267e+06	8.83398e+06	9.78231e+06	9.9804e+06	9.27575e+06	1.10826e+07	9.01999e+06	9.92543e+06	1.04387e+07	9.59835e+06	8.87209e+06	658515	3.44141e+06	640233	2.71221e+06	792973	1.7278e+07	2.2983e+07	8.11676e+06	1.32778e+07	1.43989e+07	822767	716822	1.35747e+06	4.85832e+07	4.81549e+06
1.132_409.1679	Trifluperidol	C22 H23 F4 N O2	409.168	1.132		S5366				level4					1.40019e+06	805847	1.20104e+06	1.32909e+06	944354	1.21508e+06	1.09486e+06	1.13586e+06	607381	1.91632e+06	1.16382e+06	194048	228162	220813	396558	341429	1.45793e+07	1.60816e+07	2.75782e+07	3.76488e+06	9.68761e+06	266369	400946	240610	8.41202e+06	3.09432e+06
1.135_651.4039		C34 H58 N3 O7 P	651.404	1.135						level5					288449	240957	242107	265536	238824	256698	252931	246119	271957	255861	248531	471242	461356	438141	518444	9.59406e+06	570970	515059	379736	497960	591570	542417	532743	529397	636737	7.96293e+07
1.137_277.1103	At6200000	C18 H15 N O2	277.11	1.137		S212674				level4					1.84604e+07	1.86531e+07	2.06976e+07	2.37799e+07	1.88082e+07	2.06955e+07	2.0765e+07	2.34154e+07	1.36257e+07	2.19385e+07	2.24775e+07	319616	748760	324206	406335	409193	5.90066e+07	1.89342e+08	1.12735e+08	3.77692e+07	9.83102e+07	376747	388060	1.86766e+06	8.23114e+07	3.37261e+07
1.139_274.2702			274.27	1.139						level5					1.3615e+08	1.29033e+08	1.03105e+08	1.64909e+08	1.21382e+08	1.30053e+08	1.28124e+08	1.28179e+08	1.2745e+08	1.462e+08	1.17941e+08	4.48219e+08	1.8773e+08	3.37118e+08	5.81475e+08	2.02027e+08	3.5154e+08	2.71945e+08	2.98738e+08	2.27562e+08	2.67907e+08	1.57248e+08	3.74445e+08	1.44282e+08	2.30814e+08	2.9563e+08
1.143_426.1663	Mangostanol	C24 H26 O7	426.166	1.143		S8223666	HMDB0029868			level4	Organoheterocyclic compounds	Benzopyrans	1-benzopyrans		6.9548e+06	6.9548e+06	6.9548e+06	6.9548e+06	6.9548e+06	6.9548e+06	6.9548e+06	6.9548e+06	6.9548e+06	6.9548e+06	6.9548e+06	634947	539652	111930	131799	112730	2.05464e+07	4.2252e+08	2.95957e+07	3.79255e+07	1.89877e+07	185977	103042	2.41159e+06	1.26604e+07	2.88499e+06
1.154_237.1731	4808	C14 H23 N O2	237.173	1.154		S45575				level4					2.11541e+06	2.11921e+06	2.01347e+06	2.42015e+06	2.43178e+06	2.37841e+06	2.16083e+06	2.17678e+06	2.79007e+06	1.70822e+06	2.32523e+06	1.20133e+07	3.07192e+06	1.13025e+07	1.44714e+07	1.89494e+07	3.86177e+06	4.31962e+06	1.52762e+06	2.28756e+06	1.29765e+06	5.02965e+06	1.64464e+07	4.69961e+06	4.32697e+06	1.67462e+07
1.161_739.4565		C35 H72 N3 O7 P3	739.457	1.161						level5					180178	144316	150297	164745	140097	156124	156160	140662	166417	156045	159063	297387	292972	270199	298859	482282	332686	255517	208947	272728	353329	301782	283953	308746	347588	9.92089e+06
1.164_179.0949	Phenacetin	C10 H13 N O2	179.095	1.164	C07591	S4590				level4				NULL	4.04706e+06	5.52209e+06	3.42244e+06	3.9929e+06	3.63227e+06	4.08063e+06	2.79426e+06	5.09993e+06	3.9134e+06	4.14474e+06	3.99117e+06	2.40852e+06	2.34121e+06	2.17075e+06	2.18744e+06	2.86187e+06	4.86552e+06	2.44553e+07	1.05541e+07	5.75928e+06	7.24191e+06	1.00348e+06	924414	2.19695e+06	8.58724e+06	2.61009e+06
1.168_157.1105	Tranexamic acid	C8 H15 N O2	157.111	1.168	C12535	S10482000	HMDB0014447			level4	Organic acids and derivatives	Carboxylic acids and derivatives	Amino acids, peptides, and analogues	NULL	2.25124e+06	2.02808e+06	2.5339e+06	2.82884e+06	1.83555e+06	2.4769e+06	2.36725e+06	1.8098e+06	2.24443e+06	2.85295e+06	2.19878e+06	4.19252e+06	1.73302e+06	3.50489e+06	721360	705314	1.74609e+06	907051	2.39573e+06	1.96168e+06	682831	1.24772e+06	1.26722e+06	1.84932e+06	670135	1.89861e+06
1.168_245.1053	N-phenylacetyl pyroglutamic acid	C14 H15 N O3	245.105	1.168		S30778480	HMDB0059782			level4	Benzenoids	Benzene and substituted derivatives	Phenylacetamides		4.06583e+06	3.48253e+06	3.56501e+06	4.88069e+06	3.53579e+06	3.55671e+06	4.19737e+06	3.65797e+06	3.36714e+06	3.6011e+06	4.72816e+06	2.76495e+06	3.95289e+06	2.60984e+06	1.42872e+06	8.17333e+06	5.75287e+06	6.43271e+06	7.76831e+06	5.17569e+06	1.82439e+07	7.13752e+06	2.3706e+06	5.59463e+06	1.92093e+06	5.59966e+06
1.169_385.0984		C20 H21 N O3 P2	385.098	1.169						level5					3.31707e+06	4.19535e+06	3.93286e+06	4.22018e+06	3.69777e+06	4.49601e+06	3.62284e+06	4.38302e+06	3.99209e+06	4.18339e+06	3.24149e+06	426885	396123	364490	415409	474241	5.18115e+06	2.95538e+07	2.32826e+07	4.99203e+06	9.68908e+06	454283	506950	458956	1.15831e+07	3.09095e+06
1.17_260.1196		C11 H20 N2 O3 S	260.12	1.17						level5					643034	643034	643034	643034	643034	643034	643034	643034	643034	643034	643034	246019	1.42688e+07	1.47386e+06	1.31233e+06	1.42041e+06	1.40504e+06	505148	169784	1.04973e+06	228052	3.6873e+06	238388	7.87072e+06	568718	61286.3
1.17_354.256	Bufa-20,22-dienolide	C24 H34 O2	354.256	1.17	C16921	S30791731				level4				NULL	1.51348e+06	1.73659e+06	1.29545e+06	1.77278e+06	1.91419e+06	1.69826e+06	1.63156e+06	1.26474e+06	2.74454e+06	1.01901e+06	1.9067e+06	4.25803e+06	2.07415e+06	3.93e+06	3.63709e+06	2.48076e+06	1.55272e+06	2.54925e+06	1.49902e+06	2.27256e+06	1.33466e+06	2.34254e+06	1.71923e+06	2.84176e+06	4.75971e+06	1.96385e+06
1.173_300.1686		C16 H29 O P S	300.169	1.173						level5					1.26165e+06	1.13173e+06	1.41111e+06	1.43039e+06	1.16812e+06	1.33888e+06	1.27376e+06	1.24708e+06	1.72103e+06	934075	1.33384e+06	1.01013e+06	1.33664e+06	490783	614037	645103	1.91941e+06	1.01567e+06	607090	1.88596e+06	261768	249239	285440	1.13854e+06	256567	280512
1.174_273.1429		C10 H19 N5 O4	273.143	1.174						level5					654688	654688	654688	654688	654688	654688	654688	654688	654688	654688	654688	6.53056e+07	2.70546e+07	4.23576e+06	5.62063e+06	72730.4	998850	1.5452e+06	7.17529e+06	753562	910901	2.01451e+06	8.83085e+06	3.34587e+06	3.93379e+06	980003
1.175_695.4296		C33 H68 N3 O6 P3	695.43	1.175						level5					277555	221807	230491	252118	239325	235841	244520	217733	259808	244336	249804	453389	443747	408263	455014	1.16162e+07	506517	387842	321806	469501	545502	506858	591653	468102	532965	7.80634e+07
1.179_236.1163	Hexobarbital	C12 H16 N2 O3	236.116	1.179	C11723	S3482	HMDB0015444			level4	Organoheterocyclic compounds	Diazines	Pyrimidines and pyrimidine derivatives	NULL	1.49677e+06	1.62614e+06	1.44199e+06	1.72708e+06	1.69331e+06	1.50498e+06	1.57075e+06	1.59703e+06	1.34883e+06	1.68741e+06	1.71855e+06	269120	469309	230847	291203	278792	1.96624e+06	5.14608e+06	4.98239e+06	1.56633e+06	4.02464e+06	331404	299247	3.0682e+06	3.58973e+06	1.59872e+06
1.18_361.3193		C21 H39 N5	361.319	1.18						level5					2.77817e+07	2.50385e+07	1.75827e+07	3.50028e+07	1.81512e+07	2.75054e+07	1.58662e+07	2.13996e+07	3.04374e+07	2.59085e+07	2.29001e+07	1.98407e+08	5.74357e+07	5.44609e+07	1.0685e+08	4.3738e+07	7.71538e+07	3.54138e+07	7.53279e+07	3.08276e+07	6.89209e+07	3.29593e+07	9.12548e+07	5.10518e+07	7.56118e+07	2.96199e+07
1.184_441.1578		C23 H29 N3 P2 S	441.158	1.184						level5					1.15836e+06	1.15836e+06	1.15836e+06	1.15836e+06	1.15836e+06	1.15836e+06	1.15836e+06	1.15836e+06	1.15836e+06	1.15836e+06	1.15836e+06	255047	209801	209473	240173	286754	404449	1.21731e+07	5.70106e+06	248932	2.94181e+06	252686	284638	208525	4.81505e+06	1.76433e+06
1.185_209.0149		C9 H7 N O3 S	209.015	1.185						level5					1.47675e+06	1.34193e+06	1.78276e+06	1.61883e+06	1.27542e+06	1.5518e+06	1.51184e+06	1.33937e+06	1.28484e+06	2.05113e+06	1.36605e+06	3.35705e+06	232695	1.41349e+06	3.63722e+06	259641	2.87185e+06	396872	529035	1.39812e+06	349475	258467	447853	5.68925e+06	3.23327e+06	4.54739e+06
1.185_298.1527	Olomoucine	C15 H18 N6 O	298.153	1.185		S4431	HMDB0035233			level4	Organoheterocyclic compounds	Imidazopyrimidines	Purines and purine derivatives		1.37748e+06	1.37748e+06	1.37748e+06	1.37748e+06	1.37748e+06	1.37748e+06	1.37748e+06	1.37748e+06	1.37748e+06	1.37748e+06	1.37748e+06	257989	2.19354e+06	305827	756558	2.0519e+06	1.92624e+06	1.80554e+06	1.17298e+06	2.37405e+06	477604	6.67428e+06	1.0795e+06	651653	2.83055e+06	343573
1.186_189.0793	Ipa	C11 H11 N O2	189.079	1.186		S3613	HMDB0002302			level4	Organoheterocyclic compounds	Indoles and derivatives	Indolyl carboxylic acids and derivatives		4.17885e+06	5.28411e+06	2.44986e+06	4.44586e+06	3.97537e+06	3.9651e+06	3.66741e+06	3.18554e+06	4.34938e+06	3.23734e+06	5.32866e+06	1.01208e+07	6.26947e+06	7.01791e+06	5.17329e+06	7.8813e+06	1.86211e+06	4.97124e+06	2.34875e+06	2.97608e+06	2.2937e+06	6.9538e+06	1.60971e+07	4.49221e+06	4.6119e+06	5.57348e+06
1.186_212.9728		C7 H3 N O5 S	212.973	1.186						level5					1.38928e+06	1.34084e+06	1.24782e+06	1.46806e+06	1.31932e+06	1.35437e+06	1.35094e+06	1.33367e+06	1.39196e+06	1.3516e+06	1.32905e+06	2.94839e+06	247504	184266	264157	812864	4.42219e+06	4.57002e+06	2.00653e+06	2.67709e+06	2.81888e+06	237619	372396	1.70237e+06	2.56685e+06	729152
1.188_343.2206		C15 H29 N5 O4	343.221	1.188						level5					1.25882e+06	1.31424e+06	843290	832791	606279	1.21781e+06	1.07558e+06	1.32306e+06	513453	1.22715e+06	1.02674e+06	3.05525e+06	1.7705e+06	1.713e+06	233328	1.23126e+07	257629	705151	427169	268657	505659	280704	689601	373789	322496	6.10897e+07
1.189_333.1365	2-naphthyl n-acetylphenylalaninate	C21 H19 N O3	333.137	1.189	C11341	S88663				level4				NULL	2.58729e+06	3.45204e+06	3.23725e+06	2.86681e+06	3.06877e+06	3.04721e+06	2.89494e+06	2.63329e+06	3.26018e+06	3.1241e+06	3.08164e+06	269880	271289	246966	258017	289804	3.67723e+06	1.52698e+07	1.91671e+07	2.87596e+06	8.05044e+06	309389	349413	465639	8.3901e+06	5.71769e+06
1.19_237.1004	Ethopabate	C12 H15 N O4	237.1	1.19		S5812				level4					1.81898e+06	1.38156e+06	1.5989e+06	1.91663e+06	1.50292e+06	1.75803e+06	1.62436e+06	1.45964e+06	1.51792e+06	2.18313e+06	1.46115e+06	3.8854e+06	1.51109e+06	1.64975e+06	2.78432e+06	1.12218e+06	1.57081e+06	1.76229e+06	1.35502e+06	1.87165e+06	2.04613e+06	785833	487118	1.84393e+06	1.66678e+06	1.97021e+06
1.191_203.1173	Enadenine	C10 H13 N5	203.117	1.191	C04083	S83222				level4					2.35314e+06	2.64064e+06	2.9021e+06	2.63438e+06	2.31107e+06	2.41538e+06	2.43393e+06	2.82177e+06	2.8662e+06	2.91717e+06	1.90632e+06	171134	892219	168254	176239	493379	2.40388e+06	4.57601e+06	2.25065e+06	1.65926e+06	4.01248e+06	5.30529e+06	2.61177e+06	1.68904e+07	6.65251e+06	418246
1.191_227.0796	Pretyrosine	C10 H13 N O5	227.08	1.191	C00826	S388450				level4				map00400 Phenylalanine, tyrosine and tryptophan biosynthesis; map01100 Metabolic pathways; map01230 Biosynthesis of amino acids;	796566	565360	535242	811188	607544	777755	583550	618368	456819	885434	755772	146644	376510	609589	356854	583333	901970	131850	114522	707795	176150	5.71075e+06	1.93942e+06	160025	427464	251946
1.192_479.3036		C22 H47 N3 O4 P2	479.304	1.192						level5					6.95353e+06	6.85195e+06	7.24526e+06	5.29025e+06	7.91701e+06	3.85594e+06	7.29517e+06	4.90745e+06	8.8415e+06	4.71836e+06	8.70583e+06	8.56861e+06	3.24757e+07	5.59364e+06	1.74493e+07	1.60305e+07	6.03867e+06	8.35205e+06	6.47886e+06	1.61704e+07	1.08559e+07	1.2521e+07	1.21388e+07	3.17973e+07	1.99972e+07	1.02422e+07
1.196_213.1004	Meiqx	C11 H11 N5	213.1	1.196	C19255	S56076	HMDB0029864			level4	Organoheterocyclic compounds	Diazanaphthalenes	Benzodiazines	map05204 Chemical carcinogenesis;	1.90647e+06	1.45304e+06	1.64552e+06	1.24699e+06	1.75454e+06	2.02751e+06	1.51816e+06	1.5857e+06	1.35084e+06	1.59364e+06	1.94277e+06	722141	379562	1.97188e+06	1.47575e+06	583310	2.10395e+06	670319	1.45011e+06	1.31293e+06	1.5103e+06	6.82121e+06	1.28247e+07	860115	2.34479e+06	732971
1.198_320.1122		C12 H21 N2 O6 P	320.112	1.198						level5					181059	329664	241564	165342	273049	275836	228041	300887	168241	272446	218567	156907	194485	177380	200714	210175	719768	1.07792e+06	1.46298e+06	240108	1.10759e+06	222117	278575	252084	1.97295e+06	267978
1.199_180.0901	(4-ethoxyphenyl)urea	C9 H12 N2 O2	180.09	1.199	C19415	S8663	HMDB0032565			level4	Benzenoids	Benzene and substituted derivatives	N-phenylureas	NULL	4.35777e+06	4.39282e+06	4.29646e+06	4.54157e+06	4.13751e+06	4.60792e+06	5.0922e+06	3.24129e+06	4.40934e+06	2.95467e+06	7.47089e+06	2.75227e+06	4.40405e+06	7.49012e+06	4.14791e+06	4.49562e+06	3.86411e+06	2.21348e+06	2.13432e+06	2.73361e+06	2.44865e+06	1.6757e+07	9.53202e+06	1.93841e+06	2.79424e+06	3.56266e+06
1.201_119.0735		C8 H9 N	119.073	1.201						level5					1.9489e+06	1.71578e+06	1.31554e+06	1.10174e+06	1.1487e+06	1.67832e+06	1.56151e+06	1.68985e+06	1.21769e+06	1.51965e+06	1.39147e+06	2.36083e+06	3.10928e+06	2.37052e+06	1.59e+06	2.96843e+06	2.77788e+06	1.93395e+06	1.61646e+06	1.855e+06	767434	2.48037e+06	1.38791e+06	2.03113e+06	916793	1.51416e+06
1.202_155.0949	Arecoline	C8 H13 N O2	155.095	1.202	C10129	S13872064	HMDB0030353			level4	Alkaloids and derivatives	null	null	NULL	1.45699e+06	1.69307e+06	1.74442e+06	1.60655e+06	1.02159e+06	1.31513e+06	1.67384e+06	1.10924e+06	1.361e+06	1.9176e+06	1.51864e+06	2.59552e+06	1.5571e+06	2.55205e+06	1.1146e+06	2.46676e+06	2.19897e+06	1.19175e+06	1.76174e+06	1.60583e+06	909572	2.67088e+06	819751	1.03851e+06	1.10857e+06	1.2737e+06
1.203_191.0619	Acetyl-l-methionine	C7 H13 N O3 S	191.062	1.203	C02712	S395338	HMDB0011745			level4	Organic acids and derivatives	Carboxylic acids and derivatives	Amino acids, peptides, and analogues	NULL	1.26814e+06	1.47495e+06	995853	1.27452e+06	1.25886e+06	1.25492e+06	1.27516e+06	1.19992e+06	1.38777e+06	1.07493e+06	1.33605e+06	430979	2.90962e+06	711910	1.54115e+06	3.01563e+06	874870	1.77959e+06	979390	2.00557e+06	877445	2.45208e+06	199103	1.49468e+06	968341	572513
1.203_277.1677	Promacyl	C16 H23 N O3	277.168	1.203	C18955	S33736				level4				NULL	176618	179124	138818	241110	146563	126490	172466	159434	188563	247532	115945	98961	83252.1	88647.7	104520	86837.3	121902	76543.6	72242.7	108472	110375	421280	329347	688907	111931	280510
1.204_282.1678	Mm3670000	C12 H26 O7	282.168	1.204		S16521	HMDB0061822			level4	Organic oxygen compounds	Organooxygen compounds	Ethers		287850	380606	382084	281030	273279	397829	384778	243811	310509	451673	281398	1.06382e+06	656105	1.12356e+06	387839	6.91803e+06	435932	277022	381914	478974	460779	378335	543500	409601	409734	3.22777e+07
1.206_185.1055	Ecgonine	C9 H15 N O3	185.106	1.206	C10858	MReference-2066	HMDB0006548		57.3	level3	Alkaloids and derivatives	Tropane alkaloids	null		4.56694e+06	7.04797e+06	2.66317e+06	5.26041e+06	4.646e+06	4.49058e+06	4.54878e+06	5.71813e+06	4.12197e+06	4.49356e+06	4.50493e+06	3.7494e+06	2.66561e+06	1.92709e+06	1.6714e+06	1.34899e+06	925339	1.58023e+06	2.07881e+06	1.06883e+06	1.06262e+06	1.28304e+07	1.02117e+07	8.34821e+06	1.20386e+06	1.01031e+07
1.206_238.1418		C10 H22 O6	238.142	1.206						level5					1.3196e+06	784498	864961	1.22466e+06	920666	1.38833e+06	1.04952e+06	983265	1.16474e+06	1.14454e+06	820305	3.6551e+06	5.71311e+06	1.41286e+06	909135	1.32059e+07	4.10149e+06	801073	1.88451e+06	1.04475e+06	1.50035e+06	932298	1.22709e+06	813041	1.45128e+06	5.26719e+07
1.206_246.1003	N-acetyl-trp-oh	C13 H14 N2 O3	246.1	1.206		S610602	HMDB0013713			level4	Organic acids and derivatives	Carboxylic acids and derivatives	Amino acids, peptides, and analogues		2.04364e+06	947791	1.15278e+06	1.50881e+06	2.10612e+06	1.60207e+06	1.57636e+06	1.58428e+06	1.5902e+06	1.09121e+06	1.70458e+06	2.24488e+06	2.48186e+06	1.56615e+06	1.76227e+06	8.47953e+06	2.32379e+06	2.7858e+06	1.26717e+06	2.86108e+06	2.00873e+06	3.76832e+06	1.04744e+06	4.0521e+06	1.83194e+06	1.86524e+06
1.207_193.0742	1107116	C10 H11 N O3	193.074	1.207	C05598	S61452	HMDB0000821			level4	Organic acids and derivatives	Carboxylic acids and derivatives	Amino acids, peptides, and analogues	map00360 Phenylalanine metabolism;	457864	414203	372461	209939	416590	558087	309368	398038	452323	405224	287102	231386	380277	253707	252880	292234	2.85494e+06	256481	2.87343e+06	3.26536e+06	4.03994e+06	319407	371878	410369	248146	693424
1.207_379.142	Angoline	C22 H21 N O5	379.142	1.207	C09336	S164274				level4				NULL	5.27709e+06	6.36747e+06	5.91676e+06	5.97402e+06	4.0046e+06	4.31569e+06	6.10948e+06	4.27031e+06	4.3443e+06	4.59189e+06	9.03688e+06	2.58459e+06	2.95913e+06	3.86661e+06	2.96488e+06	2.15804e+06	7.05684e+06	2.5134e+07	1.99695e+07	7.0177e+06	1.65476e+07	3.06997e+06	2.14556e+06	2.15099e+06	1.81201e+07	3.86093e+06
1.209_463.3068		C23 H46 N O6 P	463.307	1.209						level5					749480	750124	604246	828692	740922	594051	1.00835e+06	668158	916320	551829	728981	667951	1.41131e+06	1.55579e+06	562956	677620	2.82267e+06	619689	206118	5.30897e+06	1.88438e+06	1.31948e+06	1.75632e+06	1.33032e+06	1.15467e+06	1.47674e+06
1.21_224.1163	Butalbital	C11 H16 N2 O3	224.116	1.21		S2387	HMDB0014386			level4	Organoheterocyclic compounds	Diazines	Pyrimidines and pyrimidine derivatives		2.07551e+06	1.91174e+06	1.73566e+06	2.30245e+06	1.87179e+06	1.97559e+06	1.99539e+06	1.91536e+06	1.93021e+06	2.0379e+06	1.98093e+06	2.29029e+06	1.69857e+06	1.41133e+06	865903	1.39458e+06	1.91337e+06	365782	786142	1.3449e+06	808082	1.23798e+07	1.18411e+06	393659	958622	1.21667e+06
1.21_299.1521	(-)-codeine	C18 H21 N O3	299.152	1.21	C06174	S4447447	HMDB0004995			level4	Alkaloids and derivatives	Morphinans	null	map00982 Drug metabolism - cytochrome P450; map01100 Metabolic pathways;	1.47668e+06	1.8149e+06	1.44815e+06	1.9747e+06	963366	1.59253e+06	1.2909e+06	1.54285e+06	1.18391e+06	1.53505e+06	1.90831e+06	224592	245025	224094	235650	263098	969738	7.36063e+06	6.91311e+06	1.02667e+06	5.58415e+06	280707	320097	244108	3.48462e+06	2.34835e+06
1.211_219.09	Aniracetam	C12 H13 N O3	219.09	1.211	C13355	S2111				level4				NULL	2.40099e+06	3.4014e+06	2.40317e+06	4.20967e+06	2.84044e+06	2.87833e+06	2.9085e+06	2.96878e+06	2.38835e+06	2.96852e+06	3.57855e+06	4.60065e+06	1.39978e+06	1.91527e+06	1.4517e+06	1.27543e+06	2.92237e+06	6.4227e+06	7.22011e+06	2.41925e+06	5.65062e+06	6.62936e+06	9.08297e+06	9.07376e+06	6.2297e+06	8.13901e+06
1.212_143.0585	Trimethadione	C6 H9 N O3	143.059	1.212		S5374	HMDB0014491			level4	Organoheterocyclic compounds	Azolidines	Oxazolidines		829934	895048	703774	1.01324e+06	808332	874435	1.01153e+06	954748	927522	555095	996130	1.21568e+06	2.09251e+06	333486	1.20315e+06	3.87177e+06	1.6315e+06	562743	514987	1.26369e+06	564957	1.13901e+06	1.05494e+06	1.12703e+06	590092	657633
1.212_252.1111	Alanyltyrosine	C12 H16 N2 O4	252.111	1.212		MReference-308	HMDB0028699		60.3	level2	Organic acids and derivatives	Carboxylic acids and derivatives	Amino acids, peptides, and analogues		1.68264e+06	1.04486e+06	2.08684e+06	1.35161e+06	1.32704e+06	2.00173e+06	1.42994e+06	1.44471e+06	1.44307e+06	1.50841e+06	1.53023e+06	200299	433168	331187	520518	918279	1.23146e+06	216068	304440	805605	208907	2.01419e+07	7.9091e+06	171377	1.95863e+06	366886
1.213_133.0564	(1e)-n-hydroxy-4-(methylsulfanyl)-1-butanimine	C5 H11 N O S	133.056	1.213	C17241	S24784893				level4				map01210 2-Oxocarboxylic acid metabolism;	5.74009e+06	5.74009e+06	5.74009e+06	5.74009e+06	5.74009e+06	5.74009e+06	5.74009e+06	5.74009e+06	5.74009e+06	5.74009e+06	5.74009e+06	1.36386e+07	1.1058e+07	1.77809e+07	1.64047e+07	3.20866e+06	5.72178e+06	9.34895e+06	4.3171e+06	4.52531e+06	2.92591e+06	1.03229e+07	2.3792e+07	2.1224e+07	7.23041e+06	8.80547e+06
1.213_290.2651			290.265	1.213						level5					2.20926e+06	4.20535e+06	3.91058e+06	2.35558e+06	4.06703e+06	3.4633e+06	3.19494e+06	3.50331e+06	4.33459e+06	2.97137e+06	2.45878e+06	1.59672e+06	6.28845e+06	6.23951e+06	7.52307e+06	5.55443e+06	3.69414e+06	2.701e+06	5.10568e+06	5.50075e+06	2.86259e+06	6.52875e+06	6.63662e+06	4.53814e+06	5.97487e+06	3.78903e+06
1.216_203.1164	Acetylcarnitine	C9 H17 N O4	203.116	1.216		S21243783			43.4	level4					7.3546e+06	1.11156e+07	5.46914e+06	7.46014e+06	7.46179e+06	6.71204e+06	7.52762e+06	9.21435e+06	7.14386e+06	6.82053e+06	7.58452e+06	5.33643e+06	3.39286e+06	2.72184e+06	3.29415e+06	1.96759e+06	2.41082e+06	4.4071e+06	4.97015e+06	3.60285e+06	2.96166e+06	1.43394e+07	1.49955e+07	1.87958e+07	7.42971e+06	1.35438e+07
1.216_335.1594	Riboprine	C15 H21 N5 O4	335.159	1.216	C16427	S22815				level4					6.34024e+06	5.13499e+06	3.49899e+06	4.93853e+06	4.86436e+06	5.17161e+06	5.62324e+06	5.26569e+06	4.84395e+06	3.40088e+06	6.43105e+06	7.3789e+06	1.96699e+07	3.3764e+06	1.31376e+07	1.17307e+07	4.84844e+06	7.26832e+06	4.80695e+06	5.03033e+06	2.31744e+06	8.08604e+06	7.49394e+06	3.99479e+06	5.772e+06	8.22765e+06
1.217_185.0844	Pirfenidone	C12 H11 N O	185.084	1.217		S37115				level4					1.33304e+06	2.25796e+06	2.53327e+06	1.40567e+06	1.52282e+06	1.44123e+06	1.66245e+06	1.53494e+06	2.63784e+06	1.66267e+06	1.38792e+06	125875	259666	131032	140520	172207	2.2037e+06	6.75711e+06	1.66772e+07	1.26202e+06	3.81698e+06	186602	185506	466286	7.58901e+06	1.34083e+06
1.219_397.1678		C26 H23 N O3	397.168	1.219						level5					3.42886e+06	3.57801e+06	3.72323e+06	2.88789e+06	6.04659e+06	3.29206e+06	3.36933e+06	3.64852e+06	3.59257e+06	4.45495e+06	3.46475e+06	123602	147003	111134	109810	139465	1.12011e+07	1.29996e+07	2.36801e+07	1.65074e+07	6.32321e+06	160642	145228	380207	1.85976e+07	3.07796e+06
1.22_232.0848	Phenobarbital	C12 H12 N2 O3	232.085	1.22	C07434	S4599	HMDB0015305			level4	Organoheterocyclic compounds	Diazines	Pyrimidines and pyrimidine derivatives	NULL	146691	146691	146691	146691	146691	146691	146691	146691	146691	146691	146691	115013	138840	126677	88941.2	166059	1.24899e+06	127581	521032	1.46166e+06	774830	189482	86012.4	139068	50699.4	199185
1.22_651.4039		C29 H57 N5 O11	651.404	1.22						level5					116843	101120	138875	121169	106651	114893	118071	120089	131486	102056	113948	153343	201392	164827	210781	8.20229e+06	243480	178993	196524	237653	234957	233574	290048	183669	186718	6.43924e+07
1.221_289.2617		C16 H35 N O3	289.262	1.221						level5					2.41087e+07	4.38318e+07	2.35388e+07	2.5145e+07	2.56847e+07	2.67895e+07	2.60265e+07	2.8974e+07	3.10515e+07	2.68707e+07	2.53956e+07	1.10682e+08	4.72961e+07	3.03341e+07	4.93793e+07	4.26095e+07	3.51497e+07	4.15224e+07	7.04522e+07	3.63539e+07	2.48103e+07	4.44637e+07	4.71514e+07	4.40671e+07	3.63076e+07	2.75927e+07
1.221_361.1678	Veliflapon	C23 H23 N O3	361.168	1.221		S110292				level4					274780	341725	253520	265284	332389	283046	286970	301837	340489	236110	299041	79223.2	112440	97721.4	79255.8	126384	571520	1.34994e+06	1.66414e+06	580478	714466	137381	100079	100411	285386	139517
1.222_607.3786		C27 H53 N5 O10	607.379	1.222						level5					100220	86820.6	119354	104240	91841.9	100023	103814	106640	117108	90986	88794.5	152231	213596	143353	185697	9.57264e+06	213868	154750	174169	211456	208436	202942	256038	158950	163002	8.46218e+07
1.222_663.3386		C35 H56 N O5 P3	663.339	1.222						level5					261515	262954	335225	234559	277471	271820	272443	274627	263015	283680	268759	401122	1.75465e+06	911108	745336	1.7339e+06	309320	882561	224385	165938	228899	434736	96397.5	1.48592e+06	196814	640768
1.222_687.3375		C33 H54 N O12 P	687.337	1.222						level5					1.27698e+06	784883	1.302e+06	934219	1.09654e+06	1.04884e+06	1.04548e+06	1.0549e+06	1.28957e+06	1.1889e+06	804470	467499	5.18126e+06	2.0825e+06	3.66162e+06	1.29563e+06	1.45051e+06	925600	966757	1.13755e+06	890843	350145	218223	4.43266e+06	734901	602083
1.223_192.0361		C9 H8 N2 O S	192.036	1.223						level5					737637	840593	894483	749330	378011	446912	1.00506e+06	672926	885351	813736	428373	124241	242604	133441	1.39e+06	181224	1.51795e+06	1.57078e+06	772245	819609	846182	189114	234509	625425	5.88224e+06	321875
1.223_519.3265		C23 H45 N5 O8	519.327	1.223						level5					130708	116855	155371	135569	119332	129360	132257	138071	147386	114403	127741	171585	225409	184523	236132	250740	272720	200318	220230	266377	263313	261471	324967	205562	209220	1.74717e+08
1.224_245.2356		C14 H31 N O2	245.236	1.224						level5					6.29443e+07	7.34262e+07	3.55022e+07	6.1233e+07	5.84082e+07	5.87351e+07	5.65391e+07	5.34428e+07	7.64789e+07	4.74148e+07	5.48706e+07	2.57201e+08	2.56117e+08	6.77309e+07	1.18266e+08	8.32975e+07	7.22739e+07	1.40999e+08	7.7933e+07	5.41905e+07	6.21807e+07	1.08251e+08	1.21846e+08	1.55125e+08	7.66666e+07	5.70796e+07
1.225_342.2884		C19 H38 N2 O3	342.288	1.225						level5					120397	120397	120397	120397	120397	120397	120397	120397	120397	120397	120397	1.32044e+06	480114	55127.1	126586	4.91094e+06	158009	269932	89246.5	340538	120969	79084.5	184391	663638	111765	127206
1.229_317.1738	Leucyltryptophan	C17 H23 N3 O3	317.174	1.229		S291664	HMDB0028940			level4	Organic acids and derivatives	Carboxylic acids and derivatives	Amino acids, peptides, and analogues		160885	238886	137470	270636	202935	189572	193088	165265	192203	252313	174288	222089	324826	324421	229858	342324	843127	377202	481553	302769	158392	169462	294405	520614	165620	324367
1.229_361.2252		C21 H31 N O4	361.225	1.229						level5					271666	252339	294178	254604	264715	308879	256056	377796	278781	335156	164523	58500.9	554529	180893	697630	1.00238e+06	292650	172540	336896	228691	226008	749728	250966	744039	602524	419660
1.23_649.3887		C26 H62 N5 O7 P3	649.389	1.23						level5					78047.4	67582.6	92875.7	81141.5	69047.6	76520.9	76826.4	82298.9	79459.4	74680.2	74171.4	91376.1	124924	110041	137215	5.33938e+06	158564	120402	131681	167855	159062	156265	189629	122839	144083	150966
1.23_691.3986		C30 H61 N O16	691.399	1.23						level5					91032.6	78597.2	107726	94008.9	82898.5	90118.1	88535	93587.2	98470.5	85546.1	86063	119423	145574	128768	156317	9.19322e+06	183572	139984	145739	188194	175985	182694	213359	142978	135383	176344
1.231_605.8643		C10 H5 N6 O17 P3 S	605.864	1.231						level5					44976.4	38962.4	53575.3	46877.4	39975.1	44475.8	43760.9	47014.4	47115.3	44519	41040.9	53003.4	63387.6	64016	77644.2	2.34906e+06	63594.1	70091	52848.9	88151	90195.7	81685.8	91830.8	59807.2	66151.3	86924.4
1.232_171.0898	Butyryl-l-homoserine lactone	C8 H13 N O3	171.09	1.232	C11837	S8305680				level4	FA Fatty acyls	FA08 Fatty amides	FA0803 Fatty acyl homoserine lactones		3.44192e+06	3.22357e+06	3.02315e+06	2.85717e+06	3.11655e+06	4.41525e+06	3.23728e+06	2.62223e+06	4.53631e+06	2.69595e+06	3.11513e+06	1.57299e+06	1.44237e+06	1.48281e+06	1.3384e+06	1.23617e+06	1.55315e+06	598691	822602	1.02692e+06	822175	9.45174e+06	8.99293e+06	2.89649e+06	1.36553e+06	2.63089e+06
1.232_615.3379		C32 H50 N5 O3 P S	615.338	1.232						level5					433680	272361	318175	311666	254408	302625	274352	415093	460565	296410	200873	245110	1.10061e+06	493376	1.27539e+06	758659	310830	483302	483822	570019	481049	141627	224611	625073	457177	526907
1.232_647.3729		C28 H57 N O15	647.373	1.232						level5					131768	119053	156699	136757	120404	130832	134051	140246	149806	131120	113423	173163	227729	186583	239438	1.29536e+07	276360	202292	223604	270691	267404	264333	329659	207632	329918	261415
1.233_122.0112	[similar to: nicotinamide; δmass: -0.0368 da]		122.011	1.233						level5					4.33326e+06	5.43844e+06	3.01863e+06	3.57987e+06	3.4005e+06	4.19059e+06	3.61914e+06	3.89902e+06	6.1896e+06	4.39477e+06	2.39376e+06	3.58595e+06	1.29401e+07	1.16042e+07	3.77658e+06	6.5177e+06	4.03743e+06	8.51769e+06	1.25138e+06	7.79759e+06	4.02078e+06	9.52902e+06	7.11046e+06	690501	2.18136e+06	8.11411e+06
1.233_303.1258		C14 H18 N5 O P	303.126	1.233						level5					677466	1.09776e+06	298407	904046	751131	687450	688529	631447	713619	838640	578052	88227.4	59765.5	50471.5	449624	99568	3.27868e+06	2.17405e+06	1.10112e+07	1.27166e+06	1.32406e+07	69638.3	787097	63202.6	7.06288e+06	346665
1.233_365.1264		C13 H23 N3 O7 S	365.126	1.233						level5					2.71894e+06	3.65888e+06	2.72388e+06	3.32473e+06	3.53135e+06	3.30956e+06	2.83364e+06	3.36858e+06	3.26692e+06	2.67958e+06	3.51386e+06	335822	423360	336763	392570	444665	463264	1.10509e+07	8.41631e+06	412191	6.72554e+06	480633	532562	423140	3.99909e+06	2.49697e+06
1.233_464.174		C29 H24 N2 O4	464.174	1.233						level5					3.85461e+06	3.85461e+06	3.85461e+06	3.85461e+06	3.85461e+06	3.85461e+06	3.85461e+06	3.85461e+06	3.85461e+06	3.85461e+06	3.85461e+06	102289	142275	111998	124640	145479	4.17054e+06	2.61772e+07	1.58554e+07	4.72394e+06	3.15307e+07	160701	167322	236815	1.69072e+07	4.50273e+06
1.233_735.4249		C47 H64 N P3	735.425	1.233						level5					73127.8	63330.3	87046.1	76081.9	64781.7	72163.9	71091.2	76425.6	79226.9	68292	68131.9	85775.4	117350	103240	126235	3.82774e+06	147088	113109	119298	136992	143983	146671	149175	115401	107061	140814
1.234_603.3472		C29 H54 N3 O6 P S	603.347	1.234						level5					73066.5	65459.3	87236.8	76370.9	65126.1	72947.3	71719.4	76954.1	79914.8	68945.1	68847.4	86344	118559	104364	127251	1.2084e+07	148440	114165	120081	138079	144942	148263	150264	97416.6	107784	142227
1.235_559.3207		C24 H49 N O13	559.321	1.235						level5					125384	113285	149107	130131	114571	124493	127557	133451	142548	124767	107927	193398	200047	177543	227838	2.11019e+07	262971	192491	212770	257576	254449	251526	313688	196510	199416	248750
1.237_335.1157	Berberine	C20 H17 N O4	335.116	1.237	C00757	MReference-891	HMDB0003409		68.2	level2	Alkaloids and derivatives	Protoberberine alkaloids and derivatives	null	map04152 AMPK signaling pathway;	6.40547e+06	7.63454e+06	5.37258e+06	7.18764e+06	5.84982e+06	7.16039e+06	6.04431e+06	6.66426e+06	6.343e+06	5.67311e+06	7.50802e+06	133318	187543	135520	159875	179601	4.82302e+06	2.56855e+07	2.38142e+07	4.40883e+06	1.07445e+07	193239	217285	198761	9.85921e+06	5.46184e+06
1.239_377.1627		C17 H24 N5 O3 P	377.163	1.239						level5					5.08927e+06	8.50176e+06	8.76841e+06	5.1892e+06	1.05216e+07	5.01301e+06	6.28392e+06	9.27266e+06	8.07787e+06	6.0944e+06	6.2143e+06	61547.3	171344	70725	83780	93848.5	5.85891e+06	3.06554e+07	3.6258e+07	3.06515e+06	2.34928e+07	90525.1	98031.7	315032	3.09903e+07	6.66477e+06
1.24_126.0432	Thymine	C5 H6 N2 O2	126.043	1.24	C00178	BGI540	HMDB0000262	94.8	88.3	level1	Nucleic acids	Bases [Fig]	Pyrimidines	map00240 Pyrimidine metabolism; map01100 Metabolic pathways;	9.68341e+06	1.16365e+07	6.80546e+06	5.877e+06	7.98348e+06	8.678e+06	7.26625e+06	8.71921e+06	6.91654e+06	9.68557e+06	8.37505e+06	1.45391e+07	1.10531e+07	1.27787e+07	6.92054e+06	4.80112e+06	3.62742e+06	6.4192e+06	6.86949e+06	3.35054e+06	3.18886e+06	7.74516e+06	4.71776e+06	3.85113e+06	3.42998e+06	1.3482e+07
1.24_219.1261	Ritalinic acid	C13 H17 N O2	219.126	1.24		S78360	HMDB0042008			level4	Organic nitrogen compounds	Organonitrogen compounds	Amines		194725	176346	232659	203549	179650	195299	181370	147003	300743	119242	274873	258967	342801	279441	311930	372810	380073	304108	249854	264670	998437	396843	410731	312425	347253	373972
1.24_285.1366	D-(-)-morphine	C17 H19 N O3	285.137	1.24	C01516	S4450907	HMDB0014440			level4	Alkaloids and derivatives	Morphinans	null	map00982 Drug metabolism - cytochrome P450; map01100 Metabolic pathways; map04080 Neuroactive ligand-receptor interaction;	705121	791060	571022	776911	723511	710650	702527	722250	688542	705927	721591	117713	139195	130150	292860	228188	341463	2.23952e+06	6.88084e+06	268161	2.49945e+06	175843	373778	126160	1.85205e+06	1.10843e+06
1.244_526.2898		C20 H43 N6 O8 P	526.29	1.244						level5					2.70264e+06	2.49708e+06	2.13461e+06	3.0134e+06	2.83983e+06	2.72224e+06	2.25199e+06	3.0326e+06	1.58807e+06	2.33501e+06	4.27581e+06	3.58553e+06	9.60571e+06	2.60314e+06	1.58156e+07	4.38646e+06	4.88802e+06	2.53013e+06	757005	4.44849e+06	4.07255e+06	5.86492e+06	8.59952e+06	9.90634e+06	1.06173e+07	5.95456e+06
1.246_329.3294		C20 H43 N O2	329.329	1.246						level5					516866	384544	659774	379040	537730	485698	477217	485065	541366	413263	510858	327497	340776	664144	1.30463e+06	1.0076e+06	2.83504e+06	442307	1.74335e+06	2.67615e+06	2.3155e+06	522912	6.61806e+06	343430	830790	1.01698e+06
1.248_244.1788	Leu-leu	C12 H24 N2 O3	244.179	1.248	C11332	S85053				level4				NULL	1.62567e+06	1.82008e+06	1.28499e+06	1.25582e+06	1.54851e+06	1.54203e+06	1.42e+06	1.3286e+06	1.63346e+06	1.22875e+06	1.88555e+06	890848	594066	668906	522491	650224	685286	496167	1.01079e+06	396140	287093	331656	163444	1.19378e+06	175529	418528
1.251_255.0679		C10 H13 N3 O3 S	255.068	1.251						level5					965066	857139	989287	971744	808452	890164	936454	790842	813227	950282	1.09988e+06	64929.9	80827.9	64588.8	76417	85673.7	1.57536e+06	2.79783e+06	178446	1.04574e+06	154358	7.38109e+06	1.87985e+06	94634.5	1.33402e+07	86619.3
1.254_175.0636	Indole-3-acetic acid	C10 H9 N O2	175.064	1.254	C00954	S780	HMDB0000197			level4	Organoheterocyclic compounds	Indoles and derivatives	Indolyl carboxylic acids and derivatives	map00380 Tryptophan metabolism; map01100 Metabolic pathways;	2.02954e+06	1.54875e+06	1.92198e+06	1.3375e+06	1.93669e+06	1.67984e+06	1.8627e+06	1.63805e+06	1.66962e+06	1.86486e+06	1.7195e+06	8.14775e+06	1.85638e+06	2.33382e+06	1.6224e+06	3.8708e+06	1.2729e+06	954778	2.02511e+06	1.67597e+06	1.13733e+06	4.79772e+06	5.84969e+06	2.98221e+06	1.64825e+06	1.70957e+06
1.254_347.1157	1,2-dimethoxy-13-methyl[1,3]benzodioxolo[5,6-c]phenanthridine	C21 H17 N O4	347.116	1.254		S30777530	HMDB0041063			level4	Organoheterocyclic compounds	Quinolines and derivatives	Benzoquinolines		972916	1.5707e+06	1.33089e+06	1.4658e+06	1.404e+06	1.23258e+06	1.14744e+06	1.26666e+06	1.22343e+06	1.2922e+06	1.54203e+06	198114	249010	196762	224462	258083	266208	2.01433e+06	3.98493e+06	231792	4.33809e+06	281289	303494	229100	900964	1.36092e+06
1.255_299.1944		C13 H25 N5 O3	299.194	1.255						level5					342096	341455	179186	388383	325975	303838	305355	308834	273902	358997	285264	478867	657941	124766	49746.1	940198	136788	226433	173887	89262.2	105870	66080.1	172084	390513	103632	1.01306e+07
1.256_217.2044		C12 H27 N O2	217.204	1.256						level5					1.17405e+07	2.47175e+07	8.63875e+06	1.48182e+07	1.5525e+07	1.43834e+07	1.38328e+07	1.36308e+07	1.66806e+07	1.3673e+07	1.32192e+07	1.80693e+07	7.72047e+06	2.12787e+07	3.18031e+07	1.58579e+07	3.46495e+07	2.29952e+07	2.33608e+07	7.40717e+06	2.51606e+07	1.23086e+07	3.59905e+07	1.52031e+07	1.73308e+07	3.55961e+06
1.258_122.0864	[similar to: nicotinamide; δmass: 0.0383 da]		122.086	1.258						level5					2.02402e+06	1.67831e+06	2.48508e+06	1.83902e+06	1.43861e+06	1.81745e+06	1.82904e+06	2.44785e+06	1.92973e+06	1.22026e+06	2.24643e+06	2.99094e+06	6.54614e+06	6.49981e+06	5.19408e+06	7.30733e+06	2.0632e+06	9.48134e+06	1.83264e+06	4.32809e+06	2.60287e+06	5.89247e+06	7.0725e+06	327385	1.20716e+06	4.87377e+06
1.26_122.0482	Nicotinamide	C6 H6 N2 O	122.048	1.26	C00153	MReference-517	HMDB0001406	44.6	89.7	level1	Organoheterocyclic compounds	Pyridines and derivatives	Pyridinecarboxylic acids and derivatives	map00760 Nicotinate and nicotinamide metabolism; map01100 Metabolic pathways; map04977 Vitamin digestion and absorption;	2.69543e+09	1.72776e+09	2.32537e+09	2.77057e+09	4.16372e+09	2.7656e+09	2.43397e+09	2.56153e+09	2.91397e+09	2.92594e+09	2.1311e+09	2.5841e+09	5.49927e+09	4.88389e+09	4.2532e+09	3.73669e+09	2.16793e+09	2.0702e+09	2.17285e+09	1.38695e+09	2.06509e+09	2.59209e+09	2.82288e+09	3.76372e+08	1.31997e+09	3.30972e+09
1.261_441.1579		C21 H34 N O P3 S	441.158	1.261						level5					160970	141095	125122	184083	140555	149037	148982	149805	150428	144108	152050	61047.7	82523.7	66446.5	26148	62161.4	28339.6	1.53809e+06	385225	19888.1	235150	71968.2	26966.3	45325.7	2.21179e+06	183541
1.262_222.1007	Gly-phe	C11 H14 N2 O3	222.101	1.262		S87926	HMDB0028848			level4	Organic acids and derivatives	Carboxylic acids and derivatives	Amino acids, peptides, and analogues		2.3574e+07	2.88271e+07	2.4557e+07	3.9185e+07	2.97943e+07	2.7634e+07	3.06846e+07	2.51232e+07	2.60581e+07	3.45086e+07	2.73662e+07	366693	4.56028e+06	200461	2.58672e+06	266426	3.54892e+07	7.87346e+07	1.11922e+08	3.63112e+07	9.23136e+07	736816	1.04631e+06	4.13185e+06	1.29351e+08	1.82513e+07
1.274_79.0422	Pyridine	C5 H5 N	79.0422	1.274	C00747	S1020	HMDB0000926			level4	Organoheterocyclic compounds	Pyridines and derivatives	null	NULL	2.98192e+06	1.78612e+06	2.59578e+06	3.56116e+06	2.88484e+06	3.43692e+06	2.59325e+06	2.35771e+06	3.1599e+06	4.34624e+06	1.672e+06	3.06751e+06	4.86629e+06	3.09548e+06	4.43897e+06	2.97688e+06	3.80101e+06	2.15898e+06	1.50123e+06	2.9141e+06	2.35795e+06	2.44396e+06	3.32556e+06	735151	1.42174e+06	4.88015e+06
1.278_532.3192		C27 H46 N6 O P2	532.319	1.278						level5					9.59856e+06	1.605e+07	1.3858e+07	1.52668e+07	1.44878e+07	1.35041e+07	1.38393e+07	1.46515e+07	1.53933e+07	1.77769e+07	8.61893e+06	2.97961e+06	1.6226e+07	1.26651e+07	2.70775e+06	1.22511e+06	4.97922e+06	609397	2.73922e+06	5.38425e+06	886342	9.32771e+06	6.50506e+06	6.11628e+06	5.93646e+06	7.4717e+06
1.28_123.0453		C3 H10 N O2 P	123.045	1.28						level5					1.57657e+07	1.64749e+07	2.2229e+07	2.20453e+07	1.93133e+07	1.96752e+07	2.41015e+07	1.55023e+07	1.40727e+07	3.14078e+07	1.62604e+07	1.0283e+07	3.07804e+07	2.47975e+07	2.61954e+07	3.88413e+07	1.99779e+07	1.2397e+07	1.51969e+07	3.06408e+07	2.49877e+07	2.08955e+07	2.75931e+07	2.58769e+06	9.64017e+06	3.00555e+07
1.28_297.0896	5'-methylthioadenosine	C11 H15 N5 O3 S	297.09	1.28	C00170	BGI135	HMDB0001173	90.8	88	level1	Nucleosides, nucleotides, and analogues	5'-deoxyribonucleosides	5'-deoxy-5'-thionucleosides	map00270 Cysteine and methionine metabolism; map01100 Metabolic pathways;	1.30353e+07	1.42058e+07	1.61538e+07	2.47792e+07	1.29658e+07	1.57752e+07	1.50498e+07	1.47809e+07	1.32262e+07	2.29564e+07	1.32956e+07	1.44507e+07	7.04521e+06	2.10714e+07	2.27268e+07	1.13039e+07	3.61964e+07	7.48446e+06	2.51876e+07	1.76453e+07	2.12111e+07	8.82905e+06	1.88338e+07	1.15816e+07	7.20935e+06	1.55744e+07
1.287_341.1474	His-trp	C17 H19 N5 O3	341.147	1.287		S5021683				level4					2.14586e+06	2.08547e+06	2.36285e+06	2.25342e+06	1.61498e+06	2.28638e+06	1.63502e+06	2.11903e+06	2.24041e+06	2.64732e+06	1.68715e+06	823322	3.0665e+06	1.69213e+06	1.56502e+06	2.04651e+06	705735	804829	632991	558339	363348	129829	158906	993429	198489	962685
1.292_121.0166		C6 H3 N O2	121.017	1.292						level5					3.09599e+08	7.29914e+08	7.50118e+08	6.02302e+08	4.45614e+08	5.08777e+08	6.99709e+08	5.10529e+08	5.03581e+08	6.41701e+08	4.51715e+08	9.20576e+08	3.59765e+08	9.74492e+08	8.07713e+08	9.1619e+08	4.80641e+08	5.12224e+08	3.06244e+08	3.37422e+08	2.05069e+08	5.67838e+08	1.33293e+09	8.83433e+08	8.0571e+08	4.05087e+08
1.314_165.0429	Am9627000	C8 H7 N O3	165.043	1.314	C02803	S21106581				level4				NULL	2.48472e+06	2.61099e+06	3.57426e+06	5.45388e+06	3.19306e+06	4.39823e+06	3.02772e+06	3.90101e+06	2.20229e+06	3.89958e+06	3.70854e+06	4.43318e+06	407983	3.26819e+06	2.2416e+06	2.47732e+06	1.26732e+06	1.19776e+06	948444	921782	1.26491e+06	2.57911e+06	2.22338e+06	3.79095e+06	256627	2.52493e+06
1.327_122.0202	[similar to: nicotinamide; δmass: -0.0279 da]		122.02	1.327						level5					3.32125e+07	3.74949e+07	4.23008e+07	3.5517e+07	3.24645e+07	3.4486e+07	3.85414e+07	3.41089e+07	4.11633e+07	3.55976e+07	3.2934e+07	5.72331e+07	2.15356e+07	5.93888e+07	4.07202e+07	3.88303e+07	3.56715e+07	3.49352e+07	2.02651e+07	2.16398e+07	1.46373e+07	3.5597e+07	6.19937e+07	5.85706e+07	4.47411e+07	3.29332e+07
1.514_122.0112		C5 H2 N2 O2	122.011	1.514						level5					1.23563e+06	1.71756e+06	1.4617e+06	1.56854e+06	830852	1.94384e+06	991737	771558	1.3867e+06	1.77942e+06	1.74424e+06	5.96619e+06	6.52855e+06	2.56795e+06	6.38391e+06	4.0898e+06	5.05583e+06	1.74614e+06	3.86302e+06	3.59127e+06	3.85988e+06	3.47696e+06	4.0372e+06	268933	2.19536e+06	3.62036e+06
1.522_123.0323	Nicotinic acid	C6 H5 N O2	123.032	1.522	C00253	MReference-519	HMDB0001488	82.5	88.4	level2	Organoheterocyclic compounds	Pyridines and derivatives	Pyridinecarboxylic acids and derivatives	map00760 Nicotinate and nicotinamide metabolism; map01100 Metabolic pathways; map05133 Pertussis;	1.63388e+08	1.00831e+08	2.29003e+08	9.25327e+07	1.5112e+08	1.52912e+08	1.6985e+08	1.59149e+08	9.35852e+07	1.55918e+08	1.57109e+08	1.31035e+07	4.39781e+07	1.06742e+07	1.39752e+07	1.79066e+07	1.48673e+08	5.79228e+07	1.48313e+08	1.4938e+08	1.34084e+08	2.90083e+08	3.01981e+07	8.46036e+08	1.25492e+08	5.50491e+07
1.535_121.0166		C6 H3 N O2	121.017	1.535						level5					3.45628e+08	3.45628e+08	3.45628e+08	3.45628e+08	3.45628e+08	3.45628e+08	3.45628e+08	3.45628e+08	3.45628e+08	3.45628e+08	3.45628e+08	3.33562e+08	6.53942e+07	4.93238e+08	4.41651e+08	3.17219e+08	2.53428e+08	1.78649e+08	1.425e+08	2.24758e+08	1.58664e+08	1.70424e+08	3.07496e+08	2.54362e+08	2.80638e+08	4.85571e+08
1.556_124.0356			124.036	1.556						level5					8.8744e+06	5.82991e+06	8.39256e+06	6.76125e+06	8.20397e+06	7.54764e+06	7.53969e+06	7.45497e+06	7.04377e+06	8.57355e+06	7.09853e+06	1.03232e+06	1.22355e+06	304857	1.67471e+06	497402	7.27789e+06	2.74414e+06	1.3156e+07	1.11188e+07	6.36168e+06	5.88602e+06	3.1949e+06	3.27476e+07	1.21208e+07	1.77833e+06
1.563_192.0361		C9 H8 N2 O S	192.036	1.563						level5					597702	452627	441352	619362	536209	497050	493357	443914	658871	418231	604773	77356.9	1.07274e+06	85070	1.82156e+06	90800.8	2.44088e+06	2.25944e+06	1.78859e+06	2.46058e+06	2.2798e+06	101456	101113	1.30725e+06	1.24472e+07	624576
1.583_309.2304		C18 H31 N O3	309.23	1.583					64.6	level5					315040	319979	271395	341314	312195	309703	313429	307454	301354	309163	323495	1.55787e+06	218079	235557	265462	195949	347429	301579	261882	234415	404980	1.47544e+07	5.32033e+06	8.24745e+06	467275	1.58743e+06
1.78_219.1109	Pantothenic acid	C9 H17 N O5	219.111	1.78	C00864	BGI462	HMDB0000210	98.6	35.6	level1	Vitamins and Cofactors	Vitamins	Water-soluble vitamins [Fig]	map00410 beta-Alanine metabolism; map00770 Pantothenate and CoA biosynthesis; map01100 Metabolic pathways; map04977 Vitamin digestion and absorption;	5.386e+08	7.93434e+08	5.68354e+08	6.15414e+08	6.19722e+08	6.55586e+08	3.17017e+08	6.81388e+08	7.48242e+08	6.16183e+08	6.10293e+08	6.09166e+08	8.96672e+08	9.69213e+08	6.75638e+08	8.33942e+08	5.34489e+08	3.66548e+08	3.57778e+08	3.4969e+08	2.8254e+08	9.53889e+08	7.55361e+08	6.89071e+08	5.17041e+08	9.7031e+08
10.161_257.2197	[similar to: choline; δmass: 154.1200 da]		257.22	10.161						level5					50211.1	51534	51163.4	52746.1	49649.6	51240.4	50702.8	50663.8	56672	44773.7	53066.9	5995.47	2037.43	300.936	683.535	447.989	4684.6	273.8	13128.9	296.57	299.158	251.6	522.515	1597.31	834.155	557.228
10.162_257.2126	[similar to: choline; δmass: 154.1129 da]		257.213	10.162						level5					28217.7	28217.7	28217.7	28217.7	28217.7	28217.7	28217.7	28217.7	28217.7	28217.7	28217.7	1393.26	129182	11242.4	928.214	3035.66	1137.15	12099.7	4406.03	213.858	170.172	13068.2	191.376	68390	770.661	1006.77
10.273_129.0428	L-pyroglutamic acid	C5 H7 N O3	129.043	10.273	C01879	MReference-1831	HMDB0000267		89.7	level2	Organic acids and derivatives	Carboxylic acids and derivatives	Amino acids, peptides, and analogues	map00480 Glutathione metabolism; map01100 Metabolic pathways;	2.8729e+08	1.02364e+08	1.59667e+08	2.03807e+08	2.05087e+08	2.65091e+08	1.68565e+08	1.63191e+08	2.10487e+08	2.13094e+08	1.59764e+08	5.4051e+07	2.71676e+07	1.8441e+07	1.46669e+07	1.76934e+07	9.00056e+06	1.79259e+07	8.44267e+07	3.33314e+07	2.26117e+07	1.55086e+07	9.17972e+06	2.58956e+07	2.88626e+07	1.24005e+07
10.383_129.0833	[similar to: l-glutathione (reduced); δmass: -178.0005 da]		129.083	10.383						level5					339656	594529	426226	603523	433529	469457	452745	419189	428222	676625	384477	137714	104786	83830.7	217668	187112	177617	103396	95685.5	265546	122139	91408.2	186263	87135.3	265500	108006
10.403_146.0694	L-glutamine	C5 H10 N2 O3	146.069	10.403	C00064	BGI357	HMDB0000641	94.9	91.1	level1	Peptides	Amino acids	Common amino acids [Fig]	map00220 Arginine biosynthesis; map00230 Purine metabolism; map00240 Pyrimidine metabolism; map00250 Alanine, aspartate and glutamate metabolism; map00471 D-Glutamine and D-glutamate metabolism; map00630 Glyoxylate and dicarboxylate metabolism; map00910 Nitrogen metabolism; map00970 Aminoacyl-tRNA biosynthesis; map01100 Metabolic pathways; map01230 Biosynthesis of amino acids; map02010 ABC transp…	5.34872e+08	6.18141e+08	5.03229e+08	5.68039e+08	5.55655e+08	5.57332e+08	5.51917e+08	5.53341e+08	5.26835e+08	6.3628e+08	5.12282e+08	4.26331e+08	1.42621e+08	1.23871e+08	1.62223e+09	4.64631e+08	9.77722e+08	1.55237e+08	7.1905e+08	1.29077e+08	1.40701e+08	1.15684e+08	5.65533e+08	1.47874e+08	5.66945e+08	4.50315e+08
10.438_105.0428	L-serine	C3 H7 N O3	105.043	10.438	C00065	BGI378	HMDB0000187	94.1	92.3	level1	Peptides	Amino acids	Common amino acids [Fig]	map00260 Glycine, serine and threonine metabolism; map00270 Cysteine and methionine metabolism; map00600 Sphingolipid metabolism; map00630 Glyoxylate and dicarboxylate metabolism; map00920 Sulfur metabolism; map00970 Aminoacyl-tRNA biosynthesis; map01100 Metabolic pathways; map01200 Carbon metabolism; map01230 Biosynthesis of amino acids; map02010 ABC transporters; map04071 Sphingolipid signaling…	3.4015e+07	3.4015e+07	3.4015e+07	3.4015e+07	3.4015e+07	3.4015e+07	3.4015e+07	3.4015e+07	3.4015e+07	3.4015e+07	3.4015e+07	1.03602e+07	5.62066e+06	7.36658e+06	4.03748e+06	7.08508e+06	3.24085e+06	4.48332e+06	8.04683e+06	3.94613e+06	1.96935e+06	6.51157e+06	3.18931e+06	5.43113e+06	3.16515e+06	4.04406e+06
10.461_256.9861		C6 H13 N O2 P2 S2	256.986	10.461						level5					99691	178723	170967	239449	101907	186933	158645	110188	158162	150652	177839	13075	33276	5366.88	4510.43	11792.5	2563.79	16373.5	36953.4	10101.5	3094.54	2639.69	2097.31	10587.3	2685.12	2712.55
10.464_257.2165	[similar to: choline; δmass: 154.1168 da]		257.216	10.464						level5					432439	226971	506332	696769	567411	395021	487109	396413	308056	533644	552263	71748.3	54639.7	9243.93	29846.3	51986.9	22187.6	24357.2	204721	122951	27421.4	9350.07	5357.29	25253.9	61417.9	1130.37
10.712_474.1701		C17 H26 N6 O10	474.17	10.712						level5					253856	248176	278727	321770	316852	267228	290640	295422	279494	322765	230050	7979.98	5146.51	4253.31	4976.33	4614.57	4646.83	26296.8	876936	9571.48	32919.2	3903.16	4220.68	4455.31	4975.75	26847.7
10.79_256.9933	5942199	C6 H12 N O4 P S2	256.993	10.79	C18988	S16412				level4				NULL	283518	283518	283518	283518	283518	283518	283518	283518	283518	283518	283518	25710.1	44047.6	6140.55	25286.7	54139.8	65399.7	25145.5	71136.8	70858.3	6329.34	4393.51	1684.96	13257.9	10595.3	7469.91
10.818_256.9896		C11 H3 N3 O3 S	256.99	10.818						level5					401070	297993	770809	620089	414048	702979	396513	416545	505566	470709	533346	97174.3	74197.6	18180.4	22347.1	44829	14985	2342.54	141963	34255.8	20979.2	8515	1266.39	56375.6	53209	1125.34
10.875_268.1537	His-leu	C12 H20 N4 O3	268.154	10.875	C05010	S164234	HMDB0028889			level4	Organic acids and derivatives	Carboxylic acids and derivatives	Amino acids, peptides, and analogues	NULL	2.13864e+06	1.5473e+06	1.52748e+06	1.7606e+06	1.85235e+06	1.98669e+06	1.78674e+06	1.61481e+06	2.1553e+06	1.63505e+06	1.68392e+06	189309	525204	88147.8	103956	248145	158093	241328	1.48131e+06	578364	142101	44602.4	19329.5	902886	90848.4	78909.4
11.027_514.2065		C17 H36 N6 O8 P2	514.207	11.027						level5					1.28642e+07	1.23867e+07	1.12568e+07	1.48548e+07	1.11235e+07	1.26579e+07	1.16211e+07	1.43015e+07	1.54804e+07	1.06048e+07	1.09376e+07	1.43274e+06	2.89682e+06	103409	355255	1.23071e+06	1.1196e+06	790418	3.79162e+06	959918	221049	37527.7	6916.91	1.39386e+06	2.59004e+06	71201.7
11.063_256.9898		C11 H3 N3 O3 S	256.99	11.063						level5					701171	677223	706809	1.30148e+06	498823	954958	787518	746009	794031	585235	869851	167568	111033	31393	1043.45	103354	66920.6	79203.1	335439	131583	63747.9	688.675	7714.36	87618.3	1383.22	37829.2
11.064_258.1062	Fluenetil	C16 H15 F O2	258.106	11.064	C19031	S19113				level4				NULL	8.99122e+07	8.15118e+07	7.92106e+07	8.02386e+07	6.07419e+07	9.06342e+07	7.93728e+07	8.63789e+07	7.55408e+07	8.86426e+07	6.83756e+07	1.57383e+07	1.41103e+07	2.35365e+06	5.05077e+06	8.07167e+06	6.81404e+06	6.35021e+06	4.18042e+07	9.88418e+06	4.76215e+06	1.08471e+06	339391	8.39338e+06	1.26983e+07	3.62472e+06
11.091_158.0695	Oxiracetam	C6 H10 N2 O3	158.07	11.091		S4465				level4					7.7476e+06	7.18769e+06	7.20619e+06	9.12296e+06	6.62648e+06	9.30735e+06	6.15941e+06	6.17155e+06	1.02387e+07	5.7809e+06	9.43759e+06	3.94752e+06	1.60006e+06	3.47139e+06	3.39074e+06	7.3647e+06	3.55785e+06	1.56962e+06	7.63383e+06	4.46589e+06	2.85782e+06	2.38775e+06	4.44032e+06	3.54628e+06	4.22703e+06	1.09898e+06
11.208_257.2194	[similar to: choline; δmass: 154.1197 da]		257.219	11.208						level5					273208	273208	273208	273208	273208	273208	273208	273208	273208	273208	273208	28680	431.45	8245.05	82042.3	631.252	30275	272.164	1.00149e+07	5383.73	118424	450.509	61900.8	16509.1	4.08764e+06	3156.08
11.239_430.1119	Bispyribac	C19 H18 N4 O8	430.112	11.239	C10915	S391332				level4				NULL	2.23896e+06	2.04462e+06	2.01566e+06	3.11813e+06	1.93106e+06	2.41173e+06	2.06483e+06	2.4442e+06	1.69329e+06	2.58504e+06	2.4014e+06	442519	150496	57182.5	76810.8	176969	84008.1	32032.6	1.00047e+06	130356	63282.7	13509.4	7761.74	133860	138597	33356
11.366_237.038		C9 H7 N3 O5	237.038	11.366						level5					6.14728e+06	6.94041e+06	5.96016e+06	7.17349e+06	6.03292e+06	6.42282e+06	6.4286e+06	6.66703e+06	5.86484e+06	6.61933e+06	6.61923e+06	1.87972e+07	1.62161e+07	1.03205e+06	380860	1.80355e+06	1.19986e+06	780573	6.86408e+06	849528	1.45295e+06	931624	622681	1.20193e+06	519558	1.70338e+06
11.534_370.1057	Norsolorinic acid	C20 H18 O7	370.106	11.534	C20452	S23449				level4				map01100 Metabolic pathways;	2.44747e+06	2.7309e+06	2.29198e+06	2.84392e+06	2.13238e+06	2.69812e+06	2.43953e+06	2.79119e+06	2.91028e+06	1.98553e+06	2.47411e+06	39476.2	141395	93184.1	155114	144905	87926	119090	477684	137308	42532.4	191401	54779.5	123500	142047	43116.7
11.62_230.1632	Leu-val	C11 H22 N2 O3	230.163	11.62		S312585	HMDB0028942			level4	Organic acids and derivatives	Carboxylic acids and derivatives	Amino acids, peptides, and analogues		369131	465937	504174	406168	360157	446689	466062	350233	480035	423245	409543	33440.1	9761.5	8665.66	12600.6	1766.49	3939.7	8988.75	228771	6069.67	19872.4	15217.5	37256.4	20507.5	16060.3	3653.76
11.643_266.1266	Threonylphenylalanine	C13 H18 N2 O4	266.127	11.643		S3313819	HMDB0029068			level4	Organic acids and derivatives	Carboxylic acids and derivatives	Amino acids, peptides, and analogues		715820	719369	766820	667265	502948	796932	703022	637734	681592	758548	629844	6690.86	20955.9	3995.77	5169.18	2895.21	22637.5	134599	636695	42273.8	35563.9	3785.08	3673.25	8890.46	14367.6	2850.44
11.886_443.1653		C17 H25 N5 O9	443.165	11.886						level5					775666	688342	740801	776499	721713	742514	740011	719658	797115	730025	716476	112608	47928.4	68069	21278.4	17230.5	7847.38	29844.5	420027	11957.9	21080.3	3111.86	2233.86	36248	2339.36	27172.2
12.11_103.0998		C5 H13 N O	103.1	12.11						level5					1.0689e+06	1.03344e+06	1.15751e+06	940841	1.1224e+06	1.0622e+06	1.06154e+06	1.05641e+06	1.12338e+06	969455	1.10494e+06	592357	121348	78661.6	524155	169982	1.3051e+06	1.02754e+06	6.20144e+06	740495	2.60732e+06	110310	2.62819e+06	549095	1.43832e+06	794396
12.369_287.1957	Leu-arg	C12 H25 N5 O3	287.196	12.369		S3027543	HMDB0028923			level4	Organic acids and derivatives	Carboxylic acids and derivatives	Amino acids, peptides, and analogues		1.37607e+06	1.41761e+06	1.29455e+06	1.34596e+06	635476	1.3755e+06	1.25433e+06	1.24427e+06	1.25839e+06	1.17476e+06	1.11187e+06	46838.7	183721	31207.4	43847.6	144811	151306	114508	943897	282595	69699.5	25802.4	4217.53	214639	40429.6	12855.9
12.462_202.1433	N,n-dimethyl-arginine	C8 H18 N4 O2	202.143	12.462	C03626		HMDB0001539	93.8	91.1	level2	Organic acids and derivatives	Carboxylic acids and derivatives	Amino acids, peptides, and analogues	NULL	6.8917e+07	6.8917e+07	6.8917e+07	6.8917e+07	6.8917e+07	6.8917e+07	6.8917e+07	6.8917e+07	6.8917e+07	6.8917e+07	6.8917e+07	1.64083e+07	1.03673e+07	4.04346e+06	2.82656e+06	5.33877e+06	4.39675e+06	5.53654e+06	2.80495e+07	6.99171e+06	3.58738e+06	6.53366e+06	2.3511e+06	1.09552e+07	2.39181e+06	1.36755e+06
12.732_189.0753	Glycylglycylglycine	C6 H11 N3 O4	189.075	12.732		S10688	HMDB0029419			level4	Organic acids and derivatives	Carboxylic acids and derivatives	Amino acids, peptides, and analogues		904278	971316	891009	1.12944e+06	620342	1.26123e+06	844891	972117	814531	781949	1.1093e+06	218961	30682.8	52018.7	47002.4	81693.4	106197	76276.1	352535	234182	72138.2	29940.7	36550.7	86278.6	95133.3	10704.2
[truncated: 478 more rows]
