# Supplementary material for: The Protective Effects of L-Theanine against Epigallocatechin Gallate-Induced Acute Liver Injury in Mice
Source: Foods. 2024 Apr 7;13(7):1121. doi: 10.3390/foods13071121 (PMC11011850; doi:10.3390/foods13071121)
Supplement: Supplementary file 1 [file foods-13-01121-s001.zip › Table S3 DataPreprocessing_neg.xlsx]

## Sheet: Sheet 1
Compound ID	Name	Formula	Molecular.Weight	Actual.RT	KEGG.ID	ID	HMDB.ID	mzVault.Best.Match	mzCloud.Best.Match	level	Super.class	Class	Sub.class	Pathway	QC_06	QC_07	QC_08	QC_09	QC_10	QC_11	QC_12	QC_13	QC_14	QC_15	QC_16	Con1	Con2	Con3	Con4	Con5	EGCG1	EGCG2	EGCG3	EGCG4	EGCG5	LT+EGCG1	LT+EGCG2	LT+EGCG3	LT+EGCG4	LT+EGCG5
0.587_533.3701		C31 H51 N O6	533.37	0.587						level5					1.00875e+06	1.00875e+06	1.00875e+06	1.00875e+06	1.00875e+06	1.00875e+06	1.00875e+06	1.00875e+06	1.00875e+06	1.00875e+06	1.00875e+06	991993	1.63873e+06	1.20661e+06	1.18494e+06	911577	1.89633e+06	935020	1.29653e+06	1.41203e+06	2.01488e+06	1.42973e+06	488353	1.41954e+06	1.8718e+06	1.83534e+06
0.59_667.0666		C41 H18 N O5 P S	667.067	0.59						level5					283524	261427	299584	283543	288124	255070	287601	280943	280204	269405	293008	406668	337918	281594	455138	742862	776824	110456	393241	628395	486673	300323	151832	186222	213938	506768
0.592_573.4388		C35 H59 N O5	573.439	0.592						level5					1.10103e+07	9.94975e+06	1.11121e+07	1.13073e+07	1.08707e+07	1.05437e+07	1.08926e+07	1.07723e+07	1.11229e+07	1.0754e+07	1.06072e+07	1.12599e+07	1.58635e+07	1.46467e+07	1.29426e+07	1.34052e+07	2.02789e+07	9.97525e+06	1.28562e+07	1.62955e+07	1.70236e+07	1.45944e+07	7.84648e+06	1.28472e+07	1.49726e+07	1.73458e+07
0.607_299.9498		C4 H6 N4 O6 P2 S	299.95	0.607						level5					293279	290358	304367	299975	357935	288365	298963	316033	408309	199564	347361	336038	1.3407e+07	1.55176e+07	2.00755e+07	2.91163e+07	1.1935e+07	2.95459e+06	230338	346386	175813	4.92114e+07	4.52673e+07	2.25783e+06	146656	3.84718e+07
0.612_251.1516	Lt9970000	C14 H21 N O3	251.152	0.612	C18912	S39512				level4				NULL	1.32043e+06	1.16928e+06	1.1906e+06	1.31263e+06	1.40981e+06	1.08092e+06	1.1892e+06	1.39361e+06	1.12102e+06	1.50507e+06	1.13276e+06	1.3599e+06	1.66115e+06	1.77195e+06	1.48815e+06	1.60498e+06	1.91116e+06	1.29525e+06	1.36906e+06	1.58254e+06	1.75207e+06	1.42869e+06	1.34857e+06	1.69834e+06	1.65181e+06	1.6421e+06
0.618_490.2838		C28 H43 O5 P	490.284	0.618						level5					1.71227e+06	1.49728e+06	1.54183e+06	1.40408e+06	1.36024e+06	1.71156e+06	1.52495e+06	1.61429e+06	1.46922e+06	1.52598e+06	1.47214e+06	6.28087e+06	5.11229e+06	6.75596e+06	3.62897e+06	4.42377e+06	5.42873e+06	4.61772e+06	1.03913e+06	5.77763e+06	1.51963e+06	5.67535e+06	4.42141e+06	5.74733e+06	1.59432e+06	5.677e+06
0.638_240.0664			240.066	0.638						level5					17914.2	24511.1	19272.8	17396.8	19049.9	18647.4	18469.7	17323	21626.3	24597.5	15829.3	14692.9	21595	19025.3	18480.6	20596.8	27490.1	14065.2	36055.9	35264.8	31434.3	13991.4	28833.7	14944	17060.7	20466.8
0.642_322.217		C16 H34 O4 S	322.217	0.642						level5					235874	228339	249981	262890	238228	244329	237724	263064	231018	263681	220643	399005	184603	227140	243383	108988	224482	79444	538272	316470	598750	160802	572236	227134	77922.1	113030
0.643_260.9615		C5 H11 N O3 S4	260.962	0.643						level5					520787	544239	537917	525999	540233	516707	538544	516945	522012	545644	541401	378273	277835	277700	7.05321e+06	720214	169762	79078	233210	220973	143864	225724	545146	88246.9	120300	327061
0.644_336.0661	4-[(e)-2-(3,5-dimethoxyphenyl)vinyl]phenyl hydrogen sulfate	C16 H16 O6 S	336.066	0.644		S74852913	HMDB0130996			level4	Phenylpropanoids and polyketides	Stilbenes	null		2.07446e+06	2.07446e+06	2.07446e+06	2.07446e+06	2.07446e+06	2.07446e+06	2.07446e+06	2.07446e+06	2.07446e+06	2.07446e+06	2.07446e+06	2.14945e+06	4.00246e+06	2.65741e+06	4.54806e+06	9.75987e+06	1.53561e+06	56450.4	450235	1.00128e+06	647745	9903.51	869129	1.52789e+06	425824	1.42655e+06
0.645_308.2013		C15 H32 O4 S	308.201	0.645					51.4	level5					88425.3	72926.9	109635	60441.8	86378.9	104715	78043.8	100242	72177.4	106768	65171.6	399924	169741	20455.7	238682	17612.5	12306.3	9604.4	64037	37677.4	147265	20745.1	217571	20968.3	7851.74	9761.29
0.646_227.8812			227.881	0.646						level5					71742.4	67846.6	73282.9	68514.2	71599.2	67733.3	66456.9	70990	72825.8	77454	63199.7	882.483	88870.5	2109.55	1180.25	1864.88	480477	807.239	333397	476722	436768	983.575	2046.62	1006.98	644.279	16342.5
0.646_462.2808			462.281	0.646						level5					258759	285406	308897	320788	317803	282093	318038	287187	269942	312574	301552	185683	308513	250633	151010	386907	356898	228875	263421	293723	363047	471663	478378	280465	322690	295616
0.648_470.2901	N-[(10z)-7-isobutyl-3-isopropyl-5,8-dioxo-2-oxa-6,9-diazabicyclo[10.2.2]hexadeca-1(14),10,12,15-tetraen-4-yl]-1-methylprolinamide	C26 H38 N4 O4	470.29	0.648		S35032856	HMDB0029340			level4	Organic acids and derivatives	Carboxylic acids and derivatives	Amino acids, peptides, and analogues		1.0932e+06	1.01543e+06	1.29583e+06	1.01291e+06	1.10047e+06	1.09308e+06	1.10118e+06	1.10788e+06	1.05414e+06	1.15768e+06	1.07742e+06	1.45946e+06	1.72988e+06	2.01182e+06	1.92607e+06	2.21393e+06	1.75147e+06	1.4366e+06	641356	1.13529e+06	822568	1.43286e+06	1.44862e+06	1.70207e+06	1.35578e+06	2.10069e+06
0.648_494.3415	N,n-dimethyl-2-{2-[(1s,9r,10s,15r,16r)-12,14,14,19-tetramethyl-8,19-diazapentacyclo[7.7.3.0~1,9~.0~2,7~.0~10,15~]nonadeca-2,4,6,11-tetraen-16-yl]-1h-indol-3-yl}ethanamine	C33 H42 N4	494.341	0.648	C09043	S390551				level4				NULL	1.58399e+06	1.65359e+06	1.66424e+06	1.50558e+06	1.56671e+06	1.61918e+06	1.50303e+06	1.72075e+06	1.63658e+06	1.51766e+06	1.57695e+06	986305	1.56143e+06	2.08743e+06	878342	1.94459e+06	1.40041e+06	875040	1.01052e+06	1.17742e+06	1.11948e+06	1.14785e+06	977025	1.46769e+06	1.21537e+06	1.36043e+06
0.65_551.2872		C24 H45 N3 O9 S	551.287	0.65						level5					2.1175e+06	2.18778e+06	2.16622e+06	2.1889e+06	2.3859e+06	2.00844e+06	2.16334e+06	2.26774e+06	2.18648e+06	2.20312e+06	2.1426e+06	945974	1.35068e+06	1.58257e+06	877510	1.65095e+06	1.80256e+06	1.24238e+06	2.22905e+06	2.01211e+06	2.03021e+06	1.24779e+06	1.39434e+06	1.27433e+06	1.31423e+06	1.54177e+06
0.651_480.326	N-methyl-2-[(4as,4br,9bs,10r,10ar)-2,4a,10,10a-tetrahydro-1,1,3,13-tetramethyl-1h,5h-4b,9b-(iminoethano)indeno[1,2-b]indol-10-yl]-1h-indole-3-ethanamine	C32 H40 N4	480.326	0.651	C09082	S390578				level4				NULL	3.27333e+06	3.32647e+06	3.30236e+06	3.21796e+06	3.19441e+06	3.27299e+06	3.26551e+06	3.40255e+06	3.22607e+06	3.31554e+06	3.15512e+06	1.62617e+06	2.71291e+06	3.74834e+06	1.54534e+06	3.70871e+06	2.89857e+06	1.97613e+06	2.26057e+06	2.34246e+06	2.39242e+06	1.96329e+06	1.69738e+06	2.30023e+06	2.35329e+06	2.56857e+06
0.652_336.0298		C15 H12 O7 S	336.03	0.652						level5					65147.8	61921.9	70961.8	61559.2	75031.4	55437.2	58485	93848.3	63383.9	55503.4	64016.4	8446.64	25029.4	16309.5	9228.73	45407.9	77081.9	5723.87	68754.6	90403.6	123167	8994.79	15465.5	25661.6	9549.97	11006.2
0.652_378.0766		C18 H18 O7 S	378.077	0.652						level5					4.80237e+06	4.64565e+06	4.86312e+06	4.90177e+06	4.93696e+06	4.68602e+06	4.93598e+06	5.19806e+06	4.60844e+06	4.72301e+06	4.78306e+06	1.71735e+07	5.82085e+06	8.60042e+06	3.53438e+06	9.72909e+06	3.82174e+06	295782	3.04648e+06	3.43623e+06	4.66262e+06	45914.2	67600.7	2.68556e+06	195738	1.10398e+06
0.652_478.3103		C28 H46 O4 S	478.31	0.652						level5					3.02975e+06	1.51519e+06	3.17362e+06	2.59709e+06	1.35296e+06	2.469e+06	2.31214e+06	3.08512e+06	1.91348e+06	2.02651e+06	2.18293e+06	1.22694e+06	732240	1.25877e+06	858739	1.81196e+06	832655	1.31842e+06	1.49231e+06	759901	1.71322e+06	918597	1.11259e+06	1.46228e+06	1.53573e+06	677446
0.652_492.3256		C24 H48 N2 O6 S	492.326	0.652						level5					851665	999053	1.02687e+06	805036	950225	933112	907944	869958	918480	939734	958457	719111	769883	1.00736e+06	740182	1.30142e+06	953827	479220	632713	781286	580662	494462	741141	788322	575232	932486
0.653_204.0088	Guaiacol sulfate	C7 H8 O5 S	204.009	0.653		S21078	HMDB0060013			level4	Organic acids and derivatives	Organic sulfuric acids and derivatives	Arylsulfates		1.0389e+06	1.13387e+06	921644	701111	791626	1.15029e+06	1.10672e+06	713194	1.08802e+06	845995	997759	195902	1.82158e+06	452097	439362	100941	4.94885e+06	89534.2	4.87508e+06	3.97815e+06	6.30361e+06	49467.4	15093.6	252849	198135	798038
0.653_229.878		C2 H2 Cl N2 O P3 S	229.878	0.653						level5					89003.4	88387.6	86977.1	90558	87846	88603.7	88549.4	88012.3	89522.6	88865.1	87792.3	1648.04	109877	2391.58	1698.83	2499.35	602294	1093.54	450579	554804	548803	1660.77	3069.15	2020.14	1872.08	26455
0.653_280.17		C13 H28 O4 S	280.17	0.653					54.9	level5					277520	250700	196878	235635	193977	294053	230873	244975	225868	252054	215036	412119	496520	41973.2	2.61171e+06	22528.4	18982.1	14085.3	80699.4	14751.4	210582	10203.1	1.12088e+06	24787	3953.98	10753.2
0.653_294.1857	Myristyl sulfate	C14 H30 O4 S	294.186	0.653		S5058	HMDB0014607			level4	Organic acids and derivatives	Organic sulfuric acids and derivatives	Sulfuric acid esters		5.6485e+06	5.94248e+06	5.47742e+06	5.54142e+06	5.71914e+06	5.67776e+06	5.66844e+06	5.75307e+06	5.68945e+06	5.55091e+06	5.69274e+06	6.9038e+06	4.09291e+06	7.01115e+06	4.94693e+06	2.81966e+06	1.01855e+07	1.85669e+06	8.79332e+06	9.87712e+06	1.08347e+07	2.84342e+06	8.61109e+06	5.73117e+06	2.12539e+06	2.67445e+06
0.653_394.0715		C19 H14 N4 O4 S	394.072	0.653						level5					795690	836973	790394	912249	930507	739130	829563	915867	819974	906069	759099	2.50942e+06	1.02834e+06	1.88187e+06	711772	1.64295e+06	195228	14880.7	227155	214398	304910	16173.5	26299	400995	18528	188950
0.653_429.2361	Melagatran	C22 H31 N5 O4	429.236	0.653	C21551	S159822				level4				NULL	278732	217903	123787	228209	144150	232393	188694	232930	202974	191719	166208	314519	158295	223906	371672	456310	163515	138467	42475.5	99443.8	49106.6	980471	1.22053e+06	244227	105702	163319
0.653_451.2204		C18 H38 N5 O2 P S2	451.22	0.653						level5					370185	319608	367752	352793	423613	390867	352410	377206	415725	348142	333222	496070	227464	474263	586082	629534	235671	233796	82148.5	158704	39422.8	1.77745e+06	2.42269e+06	351651	523273	270193
0.653_534.2972		C19 H47 N6 O7 P S	534.297	0.653						level5					2.06431e+06	2.38972e+06	2.19735e+06	2.10563e+06	2.13568e+06	2.16999e+06	2.04169e+06	2.24753e+06	2.2261e+06	2.12336e+06	2.17392e+06	916124	1.32541e+06	1.71307e+06	779126	1.60551e+06	1.67704e+06	1.15081e+06	1.61297e+06	1.71928e+06	1.56628e+06	1.04246e+06	1.46283e+06	1.15102e+06	1.21045e+06	1.38967e+06
0.654_474.2884		C30 H38 N2 O3	474.288	0.654						level5					1.54796e+06	1.50727e+06	1.54357e+06	1.57443e+06	1.50955e+06	1.53862e+06	1.5306e+06	1.53973e+06	1.52923e+06	1.58919e+06	1.49386e+06	1.93405e+06	2.63145e+06	2.73667e+06	2.4388e+06	3.07456e+06	3.00326e+06	1.89691e+06	832740	1.67802e+06	1.06206e+06	2.08462e+06	1.75085e+06	2.52602e+06	1.9239e+06	3.08272e+06
0.655_407.2521		C20 H41 N O3 S2	407.252	0.655						level5					243599	224450	242191	205638	196195	218281	225287	223647	207392	248079	213312	485568	302919	458341	329557	478904	176877	161861	66263.6	149211	49979.2	1.16212e+06	1.41118e+06	337407	384961	130923
0.655_427.2205		C16 H38 N5 O2 P S2	427.221	0.655						level5					3.11611e+06	3.37281e+06	3.14562e+06	3.18143e+06	3.04306e+06	2.94909e+06	3.4716e+06	3.22044e+06	2.9844e+06	3.49344e+06	2.9136e+06	5.00101e+06	2.28992e+06	3.9074e+06	6.36277e+06	6.17436e+06	2.12619e+06	2.02471e+06	750712	1.56147e+06	727275	1.39837e+07	2.31843e+07	3.37648e+06	4.00559e+06	2.83888e+06
0.656_202.0296	4-ethylphenylsulfonic acid	C8 H10 O4 S	202.03	0.656		S34448630	HMDB0062551			level4	Organic acids and derivatives	Organic sulfuric acids and derivatives	Arylsulfates		6.14439e+06	5.89339e+06	6.01621e+06	6.32366e+06	5.96991e+06	6.03168e+06	6.06603e+06	6.16649e+06	5.91136e+06	6.12085e+06	6.07674e+06	5.70761e+06	1.02997e+07	4.90594e+06	6.38044e+06	5.12694e+06	1.50721e+07	708155	1.7345e+07	1.38904e+07	2.18396e+07	208163	373463	3.38785e+06	952032	7.39506e+06
0.657_382.2381		C14 H34 N6 O4 S	382.238	0.657						level5					280907	280192	277515	202730	280528	278052	268921	257653	266652	255333	273374	277522	226385	171619	192545	149764	216300	56881.1	355089	261722	434523	147257	564024	98262.5	59454.8	220854
0.657_438.264		C17 H40 N6 O3 P2	438.264	0.657						level5					18628.3	18114.8	18643.3	18976.2	18176.9	18505.3	18509.2	18515.1	18410.6	18655.3	18441.8	11351.8	15413.2	19269.1	15067.4	18882.7	27083.4	11992.1	25634	21809.1	28970.3	13620.9	18439.3	15981.5	11404.3	14520.2
0.658_405.2364		C20 H39 N O3 S2	405.236	0.658						level5					2.32526e+06	2.27252e+06	2.60549e+06	2.33639e+06	2.36609e+06	2.3077e+06	2.48067e+06	2.49062e+06	2.26802e+06	2.36048e+06	2.36521e+06	2.84571e+06	1.62004e+06	4.2257e+06	4.34363e+06	4.71195e+06	2.24064e+06	1.72568e+06	475393	1.69259e+06	451816	4.98793e+06	9.7598e+06	1.98582e+06	2.38036e+06	1.89736e+06
0.659_216.0085	2-hydroxy-5-vinylphenyl hydrogen sulfate	C8 H8 O5 S	216.008	0.659		S74851573	HMDB0124978			level4	Organic acids and derivatives	Organic sulfuric acids and derivatives	Arylsulfates		256987	214001	232395	256566	251842	240144	254985	247389	233257	248936	232963	17729.4	559665	36184	24029.7	21913.9	850612	23921.8	2.15395e+06	895410	2.61833e+06	3119.71	18517.6	75128.1	11087.7	129255
0.659_403.2207		C20 H37 N O3 S2	403.221	0.659						level5					4.94879e+06	4.74027e+06	5.10776e+06	5.08183e+06	4.22251e+06	4.65879e+06	4.95085e+06	4.93453e+06	4.611e+06	5.08396e+06	4.63277e+06	6.9824e+06	3.83864e+06	5.49843e+06	8.218e+06	7.93782e+06	4.51446e+06	2.98904e+06	1.16295e+06	3.33396e+06	1.31356e+06	2.29361e+07	3.28778e+07	6.2495e+06	7.35474e+06	4.51021e+06
0.659_490.401		C31 H54 O4	490.401	0.659						level5					788831	791736	780606	811705	781509	790064	790812	789826	806645	763952	803103	579175	1.00408e+06	511725	703684	393187	1.43634e+06	488120	1.02259e+06	1.20272e+06	1.15355e+06	777690	407619	833986	1.16556e+06	1.27422e+06
0.66_266.1543	Laurilsulfate	C12 H26 O4 S	266.154	0.66		S8448				level4					1.70476e+07	1.69464e+07	1.60432e+07	1.60175e+07	1.731e+07	1.65122e+07	1.69171e+07	1.66942e+07	1.61313e+07	1.72961e+07	1.64616e+07	2.22663e+07	1.35651e+07	2.22613e+07	1.54466e+07	7.70124e+06	2.97548e+07	5.19147e+06	3.51394e+07	3.32861e+07	3.5309e+07	6.5625e+06	2.86688e+07	1.77425e+07	4.99269e+06	6.76045e+06
0.66_368.2224	Propantheline	C23 H30 N O3	368.222	0.66	C07506	S4765	HMDB0014920			level4	Organoheterocyclic compounds	Benzopyrans	1-benzopyrans	NULL	27383.8	55896.4	32572.2	21640	37374.4	46557.4	31426.6	37301.3	35410.3	37696.5	27594.8	28678.2	56462.8	8337.58	412931	5852.31	6823.66	6463.05	8885.11	5651.61	40037.9	4560.58	136143	7680.62	2896.34	3688.88
0.661_334.1419	Pimobendan	C19 H18 N4 O2	334.142	0.661		S4657				level4					181196	168298	215252	182431	148840	180471	186558	181565	172286	167635	191261	244804	112235	217783	170879	48934.6	295271	68746.4	404871	458744	318438	67493.4	248519	206393	51098.7	50867.3
0.661_338.0453	2-(3,4-dihydroxyphenyl)-3,5-dihydroxy-7-chromanesulfinic acid	C15 H14 O7 S	338.045	0.661		S74852064	HMDB0127893			level4	Phenylpropanoids and polyketides	Flavonoids	Flavans		3.39969e+06	3.75453e+06	3.33329e+06	3.33523e+06	3.80068e+06	3.48756e+06	3.65449e+06	3.54073e+06	3.30115e+06	3.73622e+06	3.44208e+06	4.44429e+06	3.65379e+06	4.59457e+06	3.01758e+06	1.23685e+07	2.04961e+06	103649	2.30069e+06	1.42704e+06	2.53184e+06	20155.4	158049	3.01462e+06	487002	2.4834e+06
0.661_508.3198		C24 H50 N2 O5 P2	508.32	0.661						level5					273066	278119	245329	319622	284971	305895	272953	289961	255811	282020	294011	167749	347635	340998	255676	381158	279795	301434	87477.3	180622	141892	285737	333023	280175	229963	246839
0.662_205.9879	5-sulfooxymethylfurfural	C6 H6 O6 S	205.988	0.662		S136301	HMDB0059752			level4	Organic oxygen compounds	Organooxygen compounds	Carbonyl compounds		2.61279e+06	2.89913e+06	2.61008e+06	2.63229e+06	2.91546e+06	2.50099e+06	2.56988e+06	2.69142e+06	2.90176e+06	2.9182e+06	2.44974e+06	839472	5.39824e+06	1.51008e+06	264663	3.05771e+06	7.39843e+06	1.04012e+06	1.13293e+07	6.78199e+06	1.82942e+07	65293.7	950546	828892	288662	3.28498e+06
0.662_379.2207		C18 H37 N O3 S2	379.221	0.662						level5					4.41519e+06	4.0997e+06	4.35527e+06	4.19349e+06	4.3688e+06	4.22523e+06	4.30206e+06	4.34573e+06	4.19386e+06	4.27499e+06	4.3163e+06	6.68519e+06	4.00494e+06	7.50024e+06	8.68599e+06	9.62982e+06	3.62823e+06	2.83743e+06	1.58074e+06	2.64277e+06	1.939e+06	1.65521e+07	2.21998e+07	5.67724e+06	6.22655e+06	4.25412e+06
0.664_440.2798		C25 H46 P2 S	440.28	0.664						level5					21016.9	20437.6	21033.9	21409.4	20507.6	20878.1	20882.6	20889.2	20771.4	21047.4	20806.6	55791.2	42550.7	21740	58749.6	24839.8	31966.4	13529.8	31270.8	32242.2	39859.5	15367.5	39084.7	18030.8	14230.6	23448.3
0.665_354.2068	Hexamidine	C20 H26 N4 O2	354.207	0.665		S58639				level4					772142	634191	686424	583946	663138	739067	678581	713511	628818	648615	698527	611690	651875	434863	908834	278305	357976	179032	539664	401051	604414	286832	2.23971e+06	194395	152779	371949
0.666_110.0366	Hydroquinone	C6 H6 O2	110.037	0.666	C00530	S764	HMDB0002434			level4	Benzenoids	Phenols	Benzenediols	map00350 Tyrosine metabolism; map01100 Metabolic pathways;	615136	615136	615136	615136	615136	615136	615136	615136	615136	615136	615136	264727	1.23029e+06	219452	339666	432061	2.67636e+06	41970.7	2.36498e+06	2.19386e+06	2.74938e+06	9806.02	97940.5	96631	33167.3	364535
0.666_234.1614	3138020	C15 H22 O2	234.161	0.666	C09743	S4945176	HMDB0030016			level4	Terpenoids	Sesquiterpenoids (C15)	Others	NULL	2.27495e+06	2.39477e+06	2.56628e+06	2.4834e+06	2.65623e+06	2.21801e+06	2.35429e+06	2.54655e+06	2.29643e+06	2.50783e+06	2.50113e+06	2.71152e+06	2.93297e+06	3.14739e+06	2.6466e+06	3.00051e+06	3.34687e+06	2.68662e+06	2.46454e+06	2.72478e+06	3.04668e+06	2.97028e+06	3.00629e+06	3.12192e+06	3.08446e+06	3.03107e+06
0.666_351.1322	Rhizocticin a	C11 H22 N5 O6 P	351.132	0.666	C17944	S20145035				level4				map00440 Phosphonate and phosphinate metabolism;	370560	373286	371789	357289	382882	322267	386194	375738	328884	414509	356222	482440	194847	417525	434653	140555	628997	101749	978079	1.01775e+06	688140	176998	581644	413833	126803	164982
0.666_426.2642		C24 H44 P2 S	426.264	0.666						level5					122225	153359	109483	93007	96860.2	143721	108399	119954	101063	124624	119910	114746	134348	63303.3	131373	70827.9	105379	25467	221078	115457	219028	71125.4	237203	40417	34832.1	115808
0.667_188.014	P-cresylsulfate	C7 H8 O4 S	188.014	0.667		S3806481	HMDB0011635			level4	Organic acids and derivatives	Organic sulfuric acids and derivatives	Arylsulfates		7.76927e+06	7.44011e+06	7.69532e+06	7.51104e+06	7.35723e+06	7.45473e+06	7.63145e+06	7.54377e+06	7.20481e+06	7.6913e+06	7.75092e+06	1.93142e+06	1.09622e+07	1.31352e+06	2.37237e+06	1.54036e+06	3.78001e+07	250681	3.37898e+07	3.87052e+07	4.42993e+07	78930.3	252132	917601	480471	2.45639e+06
0.667_502.3434		C34 H46 O3	502.343	0.667						level5					588779	583044	656033	536121	613420	568043	575047	583994	657652	528882	615573	294829	502959	345596	619219	308698	838534	790517	1.1436e+06	837845	808660	426614	261554	492054	696675	353668
0.668_407.028		C21 H15 N O2 P2 S	407.028	0.668						level5					376282	436510	385814	360449	391838	314392	398754	409512	341753	392595	403774	593500	263422	379875	329328	897278	243806	12657.9	216974	311735	178861	16761.5	72627.1	184121	99026.9	257742
0.668_494.2687		C20 H42 N6 O4 S2	494.269	0.668						level5					181202	168703	183323	159444	191149	163474	222490	177442	170765	168964	173021	142509	136254	48823	240349	218832	107273	66587.2	64315.4	53872.8	29959.2	112210	172652	171129	307948	144048
0.669_412.2488		C22 H33 N6 P	412.249	0.669						level5					36997.2	29154.5	33195.4	31283.2	26520.8	38663.3	31643.4	32055.9	30346.1	28827.4	35887.2	58178.8	13895.2	14674.5	311991	13781.6	15564.7	10996.5	23358.5	23100.6	31028.6	9994.95	121939	17535.6	7848.01	10951.8
0.67_189.9932	Mfcd12546417	C6 H6 O5 S	189.993	0.67	C06674	S164229				level4					2.80157e+07	2.89717e+07	2.85539e+07	2.87251e+07	2.92856e+07	2.79615e+07	2.91017e+07	2.77119e+07	2.83279e+07	2.90794e+07	2.91395e+07	1.37613e+07	4.53961e+07	9.1124e+06	1.24474e+07	1.88467e+07	1.03756e+08	1.08977e+06	1.13874e+08	1.10324e+08	1.51736e+08	287815	417016	5.28594e+06	686344	1.48334e+07
0.67_272.9909		C13 H7 N O2 S2	272.991	0.67						level5					172514	205542	171280	178515	193789	174138	182123	183012	167227	185747	197212	46874.5	165249	20013.9	54712.5	27774.7	850478	5760.53	1.18363e+06	1.1284e+06	912152	5882.99	8074.93	18867.8	27128.6	61032.2
0.671_375.2765		C23 H37 N O3	375.276	0.671						level5					2.73087e+06	2.73087e+06	2.73087e+06	2.73087e+06	2.73087e+06	2.73087e+06	2.73087e+06	2.73087e+06	2.73087e+06	2.73087e+06	2.73087e+06	3.65973e+06	3.75537e+06	4.32852e+06	5.64479e+06	5.47249e+06	5.07966e+07	86089.1	2.54925e+08	1.21582e+07	1.4989e+08	7.90187e+06	2.09197e+07	2.8248e+06	1.0572e+07	1.88157e+06
0.671_694.6317		C41 H82 N4 O4	694.632	0.671						level5					694546	878452	791258	912084	657014	772344	891179	816011	726627	729891	824489	1.55162e+06	1.28344e+06	1.63339e+06	1.48311e+06	1.41163e+06	1.34138e+06	1.02618e+06	895627	583076	412846	1.50088e+06	992493	2.2401e+06	973421	1.51379e+06
0.673_352.0609	3,7-dihydroxy-2-(4-hydroxy-3-methoxyphenyl)-5-chromanesulfinic acid	C16 H16 O7 S	352.061	0.673		S74849511	HMDB0029176			level4	Phenylpropanoids and polyketides	Flavonoids	O-methylated flavonoids		1.09269e+06	1.05391e+06	1.08754e+06	1.01368e+06	1.11384e+06	1.06958e+06	1.07737e+06	1.07478e+06	1.06456e+06	1.03244e+06	1.1129e+06	2.30455e+06	793682	1.58134e+06	964723	2.40292e+06	763855	26716.4	471633	608738	882379	24709.5	81347.2	640782	129291	549901
0.674_173.9983	4-phenolsulfonic acid	C6 H6 O4 S	173.998	0.674	C12849	S4601				level4				NULL	2.13893e+07	2.38631e+07	2.17984e+07	2.10576e+07	2.22697e+07	2.17602e+07	2.29076e+07	2.22664e+07	2.11347e+07	2.22286e+07	2.23235e+07	1.04066e+07	3.97299e+07	1.0049e+07	7.1559e+06	9.30986e+06	7.92126e+07	581354	1.09381e+08	7.41427e+07	1.27919e+08	354852	893456	4.72999e+06	821104	9.01302e+06
0.674_373.2609	Myxalamid d	C23 H35 N O3	373.261	0.674	C12161	S10128297				level4				NULL	336336	365264	325454	318882	368256	347054	347871	358635	305907	356611	349748	512657	302383	549193	1.15432e+06	1.11853e+06	166055	9658.06	3.06011e+06	3.60723e+06	2.31696e+06	356448	441408	217184	203200	323726
0.674_398.2331		C22 H40 P2 S	398.233	0.674						level5					326201	374742	332211	370848	324277	345512	345840	349733	328156	351213	351206	341386	465330	313643	484036	129845	247135	216797	458895	319996	585166	103141	697981	144159	67413.3	153367
0.676_510.3371		C22 H50 N6 O3 S2	510.337	0.676						level5					569033	639390	362249	492300	609521	496106	558822	501697	594696	658201	380280	1.06863e+06	924239	287867	334702	856131	397477	529290	234905	660554	689743	581429	618436	625082	521145	569089
0.676_688.5291		C43 H78 P2 S	688.529	0.676						level5					5.12713e+06	5.16694e+06	4.88952e+06	5.51433e+06	5.25986e+06	5.17974e+06	5.33367e+06	5.15968e+06	4.85254e+06	5.2246e+06	5.42018e+06	2.68717e+06	6.3654e+06	2.50605e+06	8.38511e+06	4.299e+06	7.86444e+06	8.93411e+06	7.25046e+06	7.98771e+06	6.90783e+06	6.40558e+06	3.99352e+06	4.63787e+06	9.01794e+06	6.00782e+06
0.677_154.0263	Protocatechuic acid	C7 H6 O4	154.026	0.677	C00230	S71	HMDB0001856			level4	Benzenoids	Benzene and substituted derivatives	Benzoic acids and derivatives	map00400 Phenylalanine, tyrosine and tryptophan biosynthesis; map01100 Metabolic pathways;	1.06791e+06	957689	916320	1.04536e+06	1.02187e+06	949217	1.00107e+06	1.01531e+06	946987	1.01405e+06	1.017e+06	1.04613e+06	1.27644e+06	889184	1.02126e+06	1.28355e+06	2.36745e+06	1.06456e+06	2.19366e+06	2.43184e+06	2.47503e+06	313730	1.10962e+06	847457	648968	923178
0.677_322.0504	3-(3-hydroxyphenyl)-3-oxo-1-phenylpropyl hydrogen sulfate	C15 H14 O6 S	322.05	0.677		S74853842	HMDB0135455		32.2	level4	Phenylpropanoids and polyketides	Linear 1,3-diarylpropanoids	Chalcones and dihydrochalcones		3.84681e+07	4.03561e+07	3.88628e+07	3.92866e+07	4.24158e+07	3.99822e+07	4.15745e+07	3.81925e+07	3.7687e+07	4.0563e+07	4.17447e+07	6.89089e+07	4.40121e+07	5.3068e+07	4.59133e+07	1.33275e+08	3.69506e+07	1.81516e+06	2.07553e+07	2.886e+07	2.87798e+07	244297	1.22279e+07	2.59725e+07	7.526e+06	2.93676e+07
0.677_482.3053		C21 H47 N4 O4 P S	482.305	0.677						level5					1.89106e+06	2.01886e+06	1.67456e+06	1.62673e+06	2.00921e+06	1.91884e+06	1.74353e+06	1.80385e+06	1.66963e+06	1.9636e+06	1.95733e+06	680520	1.04065e+06	1.56094e+06	599133	1.08578e+06	1.31284e+06	825859	661891	1.18337e+06	1.00929e+06	770660	853620	896628	1.01678e+06	818727
0.678_258.9755		C5 H12 N O3 P3 S	258.976	0.678						level5					838869	875699	826101	890490	844559	760175	886902	803180	845576	872137	861395	335999	852844	303878	218572	214434	2.36477e+06	27695.9	4.55948e+06	3.46006e+06	3.6924e+06	14757.1	13964.1	145235	57219.3	308330
0.679_136.9781		C2 H3 N O4 S	136.978	0.679						level5					1.67108e+06	1.9113e+06	1.48895e+06	1.58841e+06	1.51469e+06	1.87538e+06	1.88537e+06	1.59372e+06	1.37382e+06	1.72936e+06	1.81334e+06	1.66288e+06	1.04432e+06	1.85001e+06	3.61649e+06	1.6249e+06	1.72153e+06	991051	956367	923791	930208	2.29125e+06	4.37065e+06	2.44309e+06	1.23247e+06	1.37339e+06
0.679_338.2119	Lisuride	C20 H26 N4 O	338.212	0.679		S26847	HMDB0014727			level4	Organoheterocyclic compounds	Quinolines and derivatives	Indoloquinolines		6.31372e+06	5.85698e+06	5.77265e+06	6.58567e+06	6.45913e+06	6.15524e+06	6.24761e+06	6.03443e+06	5.87678e+06	6.53143e+06	6.21262e+06	2.92929e+06	2.44885e+06	7.55522e+06	5.49311e+06	5.3336e+06	7.53561e+06	1.4257e+06	7.75893e+06	2.10082e+07	1.0784e+07	6.18106e+06	1.21437e+07	7.22682e+06	2.42929e+07	5.81112e+06
0.681_496.2848	(+)-absinthin	C30 H40 O6	496.285	0.681	C09286	S10425847	HMDB0035742			level4	Terpenoids	Sesquiterpenoids (C15)	Guaianolide	NULL	251161	275589	225204	265902	231804	253748	251154	251084	249680	252787	246258	84320.3	121636	337554	100342	204162	116677	138670	34769.5	45408.3	53959.9	64064.2	174449	258527	64847.2	167382
0.681_758.5144	(3r,2's)-myxol 2'-(2,4-di-o-methyl-alpha-l-fucoside)	C48 H70 O7	758.514	0.681	C15937	S30791999				level4					3.13398e+06	3.28495e+06	3.07565e+06	3.15285e+06	3.23222e+06	3.15295e+06	3.22397e+06	2.89891e+06	3.11194e+06	3.62779e+06	3.03336e+06	2.404e+06	2.64787e+06	1.45936e+06	7.35949e+06	2.29983e+06	3.80752e+06	2.79253e+06	3.65404e+06	5.10308e+06	2.8569e+06	4.1838e+06	3.27588e+06	4.31055e+06	4.57687e+06	4.14247e+06
0.681_916.6079		C55 H85 N2 O7 P	916.608	0.681						level5					4.96891e+06	5.15115e+06	5.19732e+06	5.0267e+06	5.40607e+06	4.40553e+06	5.20521e+06	4.95271e+06	4.90694e+06	5.21086e+06	5.29033e+06	5.43175e+06	5.81808e+06	5.98982e+06	5.29705e+06	6.94601e+06	6.03238e+06	4.4846e+06	5.12205e+06	5.45016e+06	6.61934e+06	5.07006e+06	4.74278e+06	5.70734e+06	5.7978e+06	5.53404e+06
0.682_347.1839		C18 H25 N3 O4	347.184	0.682						level5					290668	306831	232476	157358	259547	241446	291269	284952	196819	218623	283453	791819	767846	975717	764670	718258	1.06112e+06	670244	723463	949726	1.12883e+06	881444	721012	770997	957257	1.12589e+06
0.682_528.4526		C30 H60 N2 O5	528.453	0.682						level5					9.47729e+06	1.06215e+07	9.61596e+06	1.04269e+07	1.05711e+07	7.88945e+06	1.01809e+07	9.85314e+06	1.0175e+07	1.00463e+07	9.88697e+06	1.00727e+07	1.2402e+07	1.26421e+07	1.07228e+07	1.21016e+07	1.79045e+07	9.33504e+06	1.06455e+07	1.41646e+07	1.44249e+07	1.08925e+07	1.10088e+07	1.26007e+07	1.52629e+07	1.45334e+07
0.683_340.2065		C19 H32 O3 S	340.207	0.683						level5					7.14588e+06	8.05756e+06	7.52957e+06	6.12889e+06	8.35492e+06	7.03483e+06	7.64785e+06	7.42037e+06	7.84423e+06	6.91036e+06	7.33249e+06	4.68664e+06	9.018e+06	1.09731e+07	7.5555e+06	5.62503e+06	7.18314e+06	2.01226e+06	9.12055e+06	2.51332e+07	9.76891e+06	8.66456e+06	8.55755e+06	7.76894e+06	2.41567e+07	6.05039e+06
0.683_456.2746		C19 H47 N4 P3 S	456.275	0.683						level5					18723.3	23055.2	20495.9	20385	21719.3	19459.3	20760.4	19666.7	18439.2	22258.9	22410.9	17407.2	48751.9	20887	207997	26372.9	32608.6	16256.4	31556.6	40304.5	39288.6	22068.2	107902	19467.4	27729	23888
0.683_608.4642		C37 H68 O2 S2	608.464	0.683						level5					1.90116e+06	2.06312e+06	1.99854e+06	1.95423e+06	2.0307e+06	1.70972e+06	1.98931e+06	1.94915e+06	1.97687e+06	2.09722e+06	1.87863e+06	1.47739e+06	1.65534e+06	3.08177e+06	1.87709e+06	1.62151e+06	2.32698e+06	1.44206e+06	1.62546e+06	2.20377e+06	1.78321e+06	2.00411e+06	2.48185e+06	1.72787e+06	1.81974e+06	2.098e+06
0.683_712.5285		C37 H74 N6 O3 P2	712.529	0.683						level5					6.07036e+06	6.11111e+06	6.09713e+06	6.08577e+06	6.08297e+06	6.08905e+06	6.08989e+06	6.09422e+06	6.04894e+06	6.14593e+06	6.0689e+06	3.01601e+06	7.7945e+06	2.69488e+06	8.16179e+06	4.27921e+06	1.35228e+07	7.76816e+06	6.91859e+06	1.38095e+07	6.62363e+06	1.06103e+07	3.96335e+06	7.62016e+06	1.34866e+07	5.40942e+06
0.683_734.5126		C40 H71 N4 O6 P	734.513	0.683						level5					2.31526e+06	2.67584e+06	2.35654e+06	2.2416e+06	2.50835e+06	2.35866e+06	2.63696e+06	2.34388e+06	2.41113e+06	2.39429e+06	2.42047e+06	1.62302e+06	2.87582e+06	1.45033e+06	4.02985e+06	1.86084e+06	3.38227e+06	2.53872e+06	3.24793e+06	3.23071e+06	3.90397e+06	3.84028e+06	3.65985e+06	3.07089e+06	4.40365e+06	2.95334e+06
0.684_565.3511		C33 H47 N3 O5	565.351	0.684						level5					2.12123e+07	2.36947e+07	2.29557e+07	2.26951e+07	2.28694e+07	2.18817e+07	2.30973e+07	2.35589e+07	2.25752e+07	2.19468e+07	2.24236e+07	8.84457e+07	9.13406e+07	1.10903e+08	6.50189e+07	1.08217e+08	1.03239e+08	5.82e+07	9.09999e+07	1.14634e+08	1.24962e+08	9.90592e+07	8.97798e+07	8.49511e+07	6.48667e+07	1.26497e+08
0.684_592.4696		C37 H60 N4 O2	592.47	0.684						level5					1.82428e+07	2.05184e+07	1.83501e+07	2.07519e+07	2.09308e+07	1.7407e+07	1.98555e+07	1.78279e+07	1.9726e+07	1.99953e+07	2.03135e+07	1.67943e+07	2.24215e+07	2.02728e+07	1.84712e+07	1.9777e+07	2.97158e+07	1.5565e+07	2.6907e+07	3.20674e+07	2.73908e+07	1.9609e+07	1.95879e+07	2.06282e+07	2.28204e+07	2.39752e+07
0.684_678.4723		C42 H67 N2 O P S	678.472	0.684						level5					1.20263e+06	1.18042e+06	1.00067e+06	1.18005e+06	1.16314e+06	1.06311e+06	1.05795e+06	1.3018e+06	1.17055e+06	980063	1.18987e+06	1.15631e+06	1.41629e+06	947869	1.0888e+06	1.90066e+06	660587	1.0273e+06	553454	632123	501745	1.25514e+06	1.68748e+06	1.34089e+06	979911	2.00683e+06
0.684_710.513		C37 H72 N6 O3 P2	710.513	0.684						level5					5.04159e+06	5.07639e+06	4.91044e+06	5.04498e+06	5.01557e+06	4.82837e+06	5.36018e+06	4.94048e+06	4.87984e+06	5.16642e+06	4.93663e+06	2.30126e+06	6.59305e+06	2.02868e+06	4.73736e+06	2.77186e+06	1.06145e+07	4.86533e+06	6.11477e+06	1.0996e+07	6.49166e+06	1.22082e+07	5.47242e+06	6.54189e+06	1.27568e+07	4.8266e+06
0.684_716.5588	(7r,17z)-4-hydroxy-n,n,n-trimethyl-9-oxo-7-{[(1z)-1-tetradecen-1-yloxy]methyl}-3,5,8-trioxa-4-phosphahexacos-17-en-1-aminium 4-oxide	C40 H79 N O7 P	716.559	0.684		S4446608				level4					1.73074e+06	1.73074e+06	1.73074e+06	1.73074e+06	1.73074e+06	1.73074e+06	1.73074e+06	1.73074e+06	1.73074e+06	1.73074e+06	1.73074e+06	1.49785e+06	1.61615e+06	931912	1.82016e+06	1.9989e+06	2.41974e+06	1.79083e+06	3.06942e+06	2.16774e+06	3.07662e+06	2.49341e+06	2.01477e+06	2.13857e+06	4.68574e+06	3.12372e+06
0.685_324.1963		C17 H29 N2 O2 P	324.196	0.685						level5					8.88848e+06	8.65819e+06	7.42125e+06	8.62603e+06	8.0462e+06	8.76772e+06	7.93452e+06	8.52909e+06	8.17726e+06	7.95927e+06	8.89354e+06	3.53208e+06	1.52944e+07	1.27659e+07	1.16906e+07	9.18876e+06	1.06098e+07	1.9248e+06	6.76168e+06	2.42541e+07	1.30084e+07	7.1514e+06	3.56629e+06	8.91846e+06	3.81171e+07	8.18234e+06
0.685_328.1866		C15 H29 N4 P S	328.187	0.685						level5					294084	338013	299870	288802	311765	307705	309401	306636	287142	310533	319039	130539	516926	463396	243145	324827	324215	101416	318364	860413	491788	226654	440865	335963	1.52945e+06	266646
0.685_416.2921	Methandriol dipropionate	C26 H40 O4	416.292	0.685	C14634	S96675				level4				NULL	173867	184819	176517	224922	171751	184619	179232	180999	186024	168504	206662	17724.3	473340	21698.2	23252.4	28226.8	141424	354245	699257	102957	517983	23216.2	22471.2	20137.7	269331	235555
0.685_509.2876		C33 H39 N3 S	509.288	0.685						level5					50882.9	62731.8	55839.6	56881.3	59338.7	53933.7	57038.2	52114.6	53564.6	57668.7	62717.4	230981	220765	243037	202832	244476	238145	99175.5	84430.1	105651	269848	278331	166155	127762	74813.6	366809
0.685_690.5447		C46 H76 P2	690.545	0.685						level5					2.10581e+07	2.42311e+07	2.13668e+07	2.35001e+07	2.31804e+07	2.23763e+07	2.33013e+07	2.35699e+07	2.11299e+07	2.35927e+07	2.20396e+07	2.14511e+07	2.44757e+07	1.8849e+07	2.3645e+07	2.82128e+07	3.0941e+07	1.93166e+07	3.84753e+07	3.06135e+07	4.41896e+07	4.10693e+07	2.83433e+07	2.07832e+07	6.1819e+07	3.92377e+07
0.685_719.4257	Carfilzomib	C40 H57 N5 O7	719.426	0.685		S9731489				level4					1.18486e+06	1.25159e+06	1.17086e+06	1.2303e+06	1.12572e+06	1.13526e+06	1.23442e+06	1.14014e+06	1.22569e+06	1.16685e+06	1.21114e+06	1.70828e+06	960410	1.17721e+06	1.02653e+06	1.98034e+06	1.17426e+06	827882	1.62377e+06	1.27377e+06	1.28583e+06	1.10965e+06	834371	989648	1.05341e+06	1.07725e+06
0.685_846.5172		C47 H74 O13	846.517	0.685						level5					71534.2	88161.9	78446.1	86245.5	83290.9	75396.1	80249.8	74826.1	77643.9	83880.7	85931.7	391417	269833	564042	91049.2	459197	365701	166670	569696	875727	769381	278687	112247	356857	113221	376234
0.686_250.1561	Gemfibrozil	C15 H22 O3	250.156	0.686	C07020	S3345	HMDB0015371			level4	Benzenoids	Phenol ethers	null	NULL	209414	252033	230921	227347	179034	214698	228696	194527	203770	235295	237084	837270	3.15542e+06	321362	581715	859259	777227	234338	552277	635824	426542	418790	1.98959e+06	250254	423026	737276
0.686_581.3459		C33 H47 N3 O6	581.346	0.686						level5					517435	575914	512527	573974	538808	530868	545467	537324	590240	495073	549810	730173	1.28628e+06	1.63635e+06	894758	1.65357e+06	2.82183e+06	1.26987e+06	1.06897e+06	1.41025e+06	1.46861e+06	1.65602e+06	1.06991e+06	1.54702e+06	2.79089e+06	2.73128e+06
0.686_662.5121		C39 H71 N2 O4 P	662.512	0.686						level5					4.05281e+06	4.53531e+06	4.17835e+06	4.40225e+06	4.19895e+06	3.93979e+06	4.50817e+06	4.07111e+06	4.22612e+06	4.33123e+06	4.27642e+06	1.97143e+06	5.9193e+06	4.1826e+06	5.35019e+06	2.91276e+06	7.47839e+06	3.85691e+06	6.28844e+06	7.73236e+06	7.36763e+06	8.99269e+06	4.10973e+06	4.03491e+06	8.87688e+06	5.31204e+06
0.686_664.5277		C36 H68 N6 O5	664.528	0.686						level5					6.31018e+06	6.96837e+06	6.65275e+06	7.03011e+06	6.85309e+06	6.72162e+06	6.97605e+06	6.49565e+06	6.67284e+06	6.88818e+06	6.79201e+06	2.48977e+06	1.04821e+07	6.02069e+06	1.5742e+07	3.26849e+06	1.24639e+07	8.95697e+06	8.457e+06	1.26375e+07	7.61561e+06	8.65425e+06	4.02174e+06	5.6139e+06	1.10104e+07	6.36277e+06
0.686_694.5757		C46 H80 P2	694.576	0.686						level5					706172	743594	726773	702895	702579	732269	720757	694205	707697	763184	701247	660390	867219	163219	2.84605e+06	630523	733008	931299	672021	739026	813410	399308	738448	770776	898793	948401
0.687_314.0851	Sulfaphenazole	C15 H14 N4 O2 S	314.085	0.687		S5144	HMDB0015667			level4	Organoheterocyclic compounds	Azoles	Pyrazoles		2.79617e+06	2.79617e+06	2.79617e+06	2.79617e+06	2.79617e+06	2.79617e+06	2.79617e+06	2.79617e+06	2.79617e+06	2.79617e+06	2.79617e+06	730523	2.74319e+06	1.4118e+06	1.51102e+06	3.57422e+06	3.12097e+06	792999	3.1988e+06	2.97786e+06	3.47739e+06	2.26689e+06	2.81844e+06	1.10283e+06	2.67858e+06	2.82322e+06
0.687_326.1908	2-dodecylbenzenesulfonic acid	C18 H30 O3 S	326.191	0.687		S23761	HMDB0031031			level4	Benzenoids	Benzene and substituted derivatives	Benzenesulfonic acids and derivatives		1.02366e+07	9.55571e+06	1.13688e+07	9.6962e+06	1.01563e+07	1.01792e+07	1.01853e+07	1.02474e+07	1.01789e+07	9.91587e+06	1.03986e+07	6.94798e+06	1.59389e+07	1.6316e+07	6.9832e+06	1.4809e+07	1.19179e+07	3.12371e+06	7.01177e+06	2.47194e+07	1.29099e+07	1.09138e+07	1.16986e+07	1.47349e+07	3.79564e+07	1.06756e+07
0.687_411.1682	1,2,3,9,10-pentamethoxy-6-methyl-5,6-dihydro-4h-dibenzo[de,g]quinoline-7-carbaldehyde	C23 H25 N O6	411.168	0.687		S30776974	HMDB0033097			level4	Alkaloids and derivatives	Aporphines	null		169516	185954	157165	156956	194766	124987	177514	163321	139821	187439	187458	54170	179914	229494	70919.8	115794	132440	18499.5	170432	451974	170359	113614	218947	165157	684968	165517
0.687_666.5434		C36 H70 N6 O5	666.543	0.687						level5					6.7894e+06	8.0821e+06	7.48744e+06	7.69474e+06	7.38516e+06	7.48964e+06	7.37544e+06	7.46959e+06	7.38876e+06	7.57435e+06	7.45806e+06	3.52463e+06	1.0085e+07	4.49198e+06	2.58692e+07	5.25216e+06	1.11555e+07	1.05924e+07	9.5845e+06	1.13784e+07	7.99549e+06	5.49095e+06	5.41615e+06	4.68729e+06	1.09157e+07	8.40328e+06
0.688_310.1806		C16 H27 N2 O2 P	310.181	0.688						level5					9.09567e+06	1.12423e+07	9.46682e+06	9.38678e+06	9.88233e+06	9.82563e+06	9.9087e+06	8.87196e+06	9.70315e+06	9.84957e+06	1.05465e+07	5.98076e+06	1.65596e+07	3.5384e+06	1.00245e+07	2.55016e+06	8.3856e+06	2.53048e+06	4.02925e+06	1.40246e+07	1.19311e+07	2.21692e+06	1.89811e+07	9.10314e+06	3.66192e+07	1.04472e+07
0.688_612.4974		C37 H74 P2 S	612.497	0.688						level5					392042	429100	369782	390970	450599	431458	393937	405285	418974	396290	406430	153009	420696	994574	1.70256e+06	490597	667846	436369	688676	751473	554319	167010	155118	154285	429309	613736
0.688_638.5126		C32 H71 N4 O6 P	638.513	0.688						level5					4.85784e+06	5.28333e+06	4.9841e+06	5.52125e+06	4.76445e+06	5.31352e+06	5.3481e+06	4.97342e+06	4.78406e+06	5.09844e+06	5.36316e+06	2.2488e+06	6.78058e+06	7.02177e+06	1.43424e+07	3.61831e+06	9.82824e+06	5.93757e+06	7.23387e+06	1.00291e+07	7.55946e+06	8.11408e+06	4.61995e+06	4.19737e+06	9.84102e+06	5.83782e+06
0.688_677.4772			677.477	0.688						level5					1.15341e+06	1.53474e+06	911268	1.43476e+06	885149	1.3428e+06	1.094e+06	1.4067e+06	972375	1.11032e+06	1.28593e+06	1.26334e+06	1.46178e+06	1.45385e+06	1.21203e+06	2.18428e+06	961942	1.37778e+06	896378	825997	821551	1.13764e+06	1.63547e+06	1.2555e+06	1.2907e+06	2.02446e+06
0.689_150.0166	(.+/-.)-tartaric acid	C4 H6 O6	150.017	0.689		S852	HMDB0062642			level4	Organic oxygen compounds	Organooxygen compounds	Carbohydrates and carbohydrate conjugates		376944	383599	370843	384184	376723	378394	378425	378940	375269	382345	377182	99576	331548	205416	180832	414840	415256	106957	360217	364268	281593	295806	310641	164931	216413	343979
0.689_556.3874		C33 H52 N2 O5	556.387	0.689						level5					1.00447e+06	1.02801e+06	1.03295e+06	924378	951948	968906	1.03712e+06	955237	1.01073e+06	989688	981441	1.17092e+06	1.04932e+06	1.26216e+06	1.32341e+06	1.32665e+06	783412	1.20772e+06	661532	640303	598943	905291	838418	1.25654e+06	1.47386e+06	1.10218e+06
0.689_640.5283		C39 H68 N4 O3	640.528	0.689						level5					3.16469e+06	3.34055e+06	2.85752e+06	3.43482e+06	3.10983e+06	3.20369e+06	3.15181e+06	3.16103e+06	3.2049e+06	3.26228e+06	3.09075e+06	1.87974e+06	4.63716e+06	2.94797e+06	1.06747e+07	2.59495e+06	4.47381e+06	5.09537e+06	4.53008e+06	5.23964e+06	4.6078e+06	2.42961e+06	2.47275e+06	2.17128e+06	4.66046e+06	4.00972e+06
0.69_159.9321		C H4 O3 S3	159.932	0.69						level5					443636	476261	433864	514037	438084	466348	534617	388514	419648	519480	484840	2.06577e+06	218680	200212	1.18079e+06	307263	121491	873585	420976	93241.8	135123	55905.6	385388	18406.6	60301.9	107186
0.69_534.4021		C32 H50 N6 O	534.402	0.69						level5					1.29771e+06	1.34444e+06	1.23877e+06	1.20736e+06	1.33947e+06	1.30124e+06	1.31951e+06	1.25758e+06	1.30301e+06	1.28855e+06	1.27908e+06	1.2448e+06	1.26552e+06	1.83646e+06	1.93291e+06	1.81735e+06	1.39499e+06	1.87113e+06	746495	898982	802286	589269	678890	1.04172e+06	1.48214e+06	1.51296e+06
0.69_653.4754		C32 H68 N3 O8 P	653.475	0.69						level5					1.08035e+06	1.22656e+06	2.54243e+06	1.22364e+06	1.14674e+06	1.23396e+06	1.60272e+06	1.17485e+06	1.31844e+06	1.33204e+06	1.50559e+06	1.31101e+06	2.10785e+06	1.43753e+06	963168	2.30509e+06	753107	959935	925320	861164	991583	992823	1.91703e+06	1.20361e+06	1.34137e+06	2.07929e+06
0.69_707.5362		C38 H79 N O6 P2	707.536	0.69						level5					773256	770250	741124	812757	751586	769393	769755	773915	754651	776459	772794	793321	560562	682563	269403	917662	692636	686574	1.40997e+06	981552	1.34453e+06	1.39674e+06	779734	689296	1.81161e+06	1.09595e+06
0.691_508.3878		C29 H52 N2 O5	508.388	0.691						level5					1.14342e+06	1.08683e+06	1.00314e+06	1.09959e+06	997270	951328	1.17467e+06	1.01841e+06	1.05307e+06	1.08438e+06	1.05463e+06	808841	1.26665e+06	1.36878e+06	1.40895e+06	1.30802e+06	1.17168e+06	1.58059e+06	893814	786043	989055	1.08151e+06	1.21275e+06	1.50455e+06	2.01147e+06	1.38199e+06
0.691_580.3873		C35 H52 N2 O5	580.387	0.691						level5					488845	539542	555216	489065	536225	484866	537733	476090	480323	557280	550083	567166	623155	654969	1.12009e+06	738213	419633	763177	381392	336529	401303	556933	515139	744432	759304	642172
0.691_632.5016		C39 H68 O6	632.502	0.691						level5					1.1464e+06	1.30402e+06	1.21248e+06	1.22676e+06	1.33608e+06	1.128e+06	1.24592e+06	1.14463e+06	1.22595e+06	1.24123e+06	1.30813e+06	1.07688e+06	1.97933e+06	992184	1.12445e+06	1.37066e+06	1.19544e+06	1.45344e+06	1.15117e+06	1.13376e+06	1.2853e+06	2.12908e+06	2.13431e+06	1.61123e+06	2.49874e+06	1.61065e+06
0.691_652.4712		C40 H65 N2 O3 P	652.471	0.691						level5					3.68275e+06	3.56984e+06	3.43849e+06	4.10601e+06	3.02015e+06	3.73165e+06	3.07397e+06	3.55682e+06	3.52012e+06	3.60296e+06	3.73761e+06	3.44297e+06	6.14886e+06	3.69122e+06	3.35393e+06	4.10891e+06	2.23869e+06	2.75855e+06	2.80817e+06	2.0902e+06	3.00177e+06	3.41857e+06	5.29183e+06	3.43723e+06	3.78258e+06	4.41876e+06
0.692_676.4726		C42 H65 N2 O3 P	676.473	0.692						level5					2.70368e+06	2.82873e+06	2.76971e+06	2.48142e+06	2.72185e+06	1.82053e+06	3.14306e+06	2.39643e+06	2.15676e+06	2.86585e+06	3.08743e+06	2.80144e+06	4.73125e+06	2.17615e+06	2.67663e+06	4.44475e+06	1.48756e+06	2.63915e+06	1.61695e+06	1.71689e+06	1.75568e+06	2.15439e+06	3.50986e+06	3.12316e+06	3.14464e+06	4.05176e+06
0.693_224.0352			224.035	0.693						level5					1.19709e+06	1.43664e+06	1.25835e+06	1.22288e+06	1.31759e+06	1.27559e+06	1.28902e+06	1.2872e+06	1.25708e+06	1.27635e+06	1.30824e+06	246581	940462	316541	1.0098e+06	1.02836e+06	1.48466e+06	292266	1.3656e+06	1.02647e+06	1.22753e+06	804486	1.45352e+06	392429	936285	1.25499e+06
0.693_532.3861		C26 H52 N4 O7	532.386	0.693						level5					1.71982e+06	1.75948e+06	1.65877e+06	1.81411e+06	1.70424e+06	1.66833e+06	1.91187e+06	1.76859e+06	1.79014e+06	1.5884e+06	1.72598e+06	1.72019e+06	2.20576e+06	2.13613e+06	2.29846e+06	2.2603e+06	2.09566e+06	2.37542e+06	1.53128e+06	1.58037e+06	1.53949e+06	1.77495e+06	1.53205e+06	2.63095e+06	3.01008e+06	1.98107e+06
0.693_586.3355		C35 H54 O S3	586.336	0.693						level5					1.96121e+06	2.25949e+06	2.38232e+06	1.99732e+06	2.28875e+06	1.96934e+06	2.11986e+06	2.01708e+06	2.37787e+06	2.09016e+06	2.15846e+06	1.70738e+06	1.99677e+06	2.09681e+06	2.49573e+06	2.23238e+06	2.82774e+06	1.99278e+06	2.7396e+06	2.43324e+06	2.8685e+06	2.3028e+06	2.00521e+06	2.13583e+06	2.48369e+06	3.04462e+06
0.693_609.4592		C35 H63 N O7	609.459	0.693						level5					1.28707e+06	1.34649e+06	1.35283e+06	1.52612e+06	1.43101e+06	1.19226e+06	1.41009e+06	1.23806e+06	1.44565e+06	1.33678e+06	1.44193e+06	1.03721e+06	1.55539e+06	1.49179e+06	1.04267e+06	1.60377e+06	2.13379e+06	1.06047e+06	1.69311e+06	2.0345e+06	1.60782e+06	1.11454e+06	522862	1.48039e+06	1.5587e+06	1.73609e+06
0.693_626.5243		C38 H77 P3	626.524	0.693						level5					388435	390831	325734	431960	368803	325980	379766	376527	397027	363973	372673	509468	22611.7	580895	335546	658740	525670	583195	881250	607163	29407.4	585307	295031	401932	610491	401867
0.693_630.4865		C33 H67 N4 O5 P	630.486	0.693						level5					5.00489e+06	4.93982e+06	4.89789e+06	4.74498e+06	5.08563e+06	4.79156e+06	4.98271e+06	5.24001e+06	4.7795e+06	4.86323e+06	4.87847e+06	3.59628e+06	7.82712e+06	5.55759e+06	5.47161e+06	7.30696e+06	3.95061e+06	4.72278e+06	3.22474e+06	3.71806e+06	3.60604e+06	2.84303e+06	4.25839e+06	3.75008e+06	4.19864e+06	6.59498e+06
0.693_646.4812		C38 H67 N2 O4 P	646.481	0.693						level5					6.74872e+06	6.87261e+06	7.28009e+06	6.01578e+06	7.16007e+06	6.86657e+06	6.94794e+06	6.84965e+06	6.80464e+06	6.68147e+06	6.84373e+06	5.85999e+06	1.29617e+07	6.93858e+06	5.70546e+06	8.98651e+06	5.70337e+06	5.76388e+06	5.75614e+06	5.27701e+06	6.19427e+06	7.49982e+06	1.02605e+07	8.03898e+06	8.11405e+06	1.02519e+07
0.693_682.3051		C28 H53 N4 O9 P3	682.305	0.693						level5					1.92358e+06	1.97715e+06	2.09275e+06	2.06862e+06	2.1546e+06	2.04927e+06	1.99439e+06	2.14125e+06	1.96964e+06	1.98649e+06	2.07725e+06	1.17305e+06	1.12261e+06	1.2672e+06	783515	1.68581e+06	1.05919e+06	797737	1.17224e+06	1.19486e+06	1.05032e+06	1.25917e+06	2.65726e+06	1.15135e+06	1.15435e+06	2.07857e+06
0.694_240.0664	1-(propyldisulfanyl)-1-(propylsulfinyl)propane	C9 H20 O S3	240.066	0.694		S35013539	HMDB0033071			level4	Organosulfur compounds	Sulfoxides	null		4.46932e+06	4.46932e+06	4.46932e+06	4.46932e+06	4.46932e+06	4.46932e+06	4.46932e+06	4.46932e+06	4.46932e+06	4.46932e+06	4.46932e+06	3.01051e+06	3.69118e+06	2.32711e+06	1.66547e+06	3.38762e+06	2.57325e+06	1.36002e+06	5.19583e+06	3.21046e+06	4.69901e+06	2.80127e+06	4.05065e+06	1.81718e+06	3.11135e+06	4.01432e+06
0.695_361.1996	Semagacestat	C19 H27 N3 O4	361.2	0.695		S8019465				level4					179079	148667	176954	189518	117147	218324	122898	175980	140243	215461	147389	565427	288769	280459	330293	316471	377469	179346	977022	345304	1.31629e+06	362299	870984	439540	500979	398147
0.695_604.4694		C33 H60 N6 O4	604.469	0.695						level5					4.80389e+06	5.36652e+06	4.99254e+06	4.98533e+06	4.97055e+06	5.33295e+06	5.05694e+06	4.81697e+06	5.25703e+06	5.21447e+06	4.82969e+06	3.29259e+06	6.99881e+06	3.81099e+06	4.26946e+06	5.25405e+06	5.28669e+06	5.95657e+06	4.58256e+06	4.66257e+06	4.33664e+06	7.47101e+06	7.2698e+06	5.55169e+06	8.89924e+06	7.31593e+06
0.695_628.4707		C33 H65 N4 O5 P	628.471	0.695						level5					5.52993e+06	5.66743e+06	6.00612e+06	4.80618e+06	5.87424e+06	5.61862e+06	5.65514e+06	5.64965e+06	5.5528e+06	5.49817e+06	5.54972e+06	4.62754e+06	1.1256e+07	5.91882e+06	4.43305e+06	7.10179e+06	4.83854e+06	4.44789e+06	5.02681e+06	4.4802e+06	5.42277e+06	6.51366e+06	8.74471e+06	6.68134e+06	7.02834e+06	8.20343e+06
0.696_312.1753	4-undecylbenzenesulfonic acid	C17 H28 O3 S	312.175	0.696		S35040	HMDB0032549			level4	Benzenoids	Benzene and substituted derivatives	Benzenesulfonic acids and derivatives		7.58383e+06	8.6771e+06	7.51599e+06	7.24822e+06	8.12651e+06	7.74913e+06	7.77518e+06	7.51554e+06	8.05602e+06	7.37557e+06	8.29327e+06	3.72981e+06	1.59819e+07	1.49904e+07	6.48935e+06	1.09153e+07	1.0153e+07	3.75378e+06	4.68761e+06	1.53304e+07	8.53903e+06	6.31789e+06	1.33872e+07	1.07086e+07	4.71016e+07	7.36459e+06
0.696_602.4536		C30 H62 N6 O4 S	602.454	0.696						level5					829856	785220	769658	761234	820965	839513	804940	791606	840545	745093	804377	638825	1.0192e+06	770875	901838	1.25736e+06	744137	833664	671390	667371	617131	473029	586356	595996	770876	1.24483e+06
0.698_203.0248	Cystathionine ketimine	C7 H9 N O4 S	203.025	0.698		S119692	HMDB0002015			level4	Organic acids and derivatives	Carboxylic acids and derivatives	Amino acids, peptides, and analogues		987595	986436	943569	1.01729e+06	1.02119e+06	1.02283e+06	1.0932e+06	924777	995610	913591	1.09102e+06	865161	964740	537073	170534	1.63241e+06	5.5382e+06	16228.2	2.83239e+06	4.61077e+06	4.76056e+06	20097.9	14474.2	70921.9	21460.8	128892
0.698_654.309		C35 H47 N2 O8 P	654.309	0.698						level5					2.06088e+06	2.1766e+06	1.96e+06	1.9897e+06	2.19386e+06	1.92658e+06	2.16075e+06	1.78454e+06	1.96469e+06	2.0094e+06	2.45661e+06	3.70605e+06	2.51446e+06	3.08984e+06	1.40355e+06	3.21272e+06	2.17733e+06	1.65277e+06	1.65379e+06	1.81383e+06	2.08173e+06	1.87527e+06	3.20967e+06	2.33214e+06	1.54267e+06	2.88778e+06
0.699_386.3179	Fafar hs-50	C26 H42 O2	386.318	0.699		S84878	HMDB0032925			level4	Organic oxygen compounds	Organooxygen compounds	Carbonyl compounds		2.9857e+06	3.15108e+06	3.01682e+06	3.11346e+06	3.37005e+06	3.18337e+06	3.03361e+06	3.06826e+06	3.33355e+06	2.99134e+06	3.11859e+06	53412.9	6.77703e+06	1.57233e+06	49370.6	109719	2.43038e+06	6.86367e+06	5.1246e+06	2.41987e+06	4.88628e+06	55987.6	176072	1.72269e+06	8.40545e+06	1.48723e+06
0.699_414.3489	5alpha-ergosta-7,22-diene-3beta,5-diol	C28 H46 O2	414.349	0.699	C04416	S4444268				level4	ST Sterol Lipids	ST01 Sterols	ST0103 Ergosterols and C24-methyl derivatives	NULL	231177	194794	176109	229075	192374	165845	239965	182261	210549	175237	230518	12887.9	539795	86558.3	15357.5	15542.6	129543	570220	368343	144399	385943	15212.6	12802.3	94209.3	528281	69277.1
0.699_442.259		C20 H42 O8 S	442.259	0.699						level5					6.79961e+06	6.7858e+06	6.6068e+06	7.04265e+06	6.80542e+06	6.78003e+06	6.85791e+06	6.67314e+06	6.72657e+06	6.67775e+06	7.0809e+06	7.40993e+06	5.58952e+06	6.19163e+06	8.34219e+06	7.75492e+06	7.47121e+06	6.74478e+06	8.82036e+06	7.47273e+06	8.74418e+06	7.00644e+06	7.54297e+06	6.77078e+06	7.5087e+06	8.69671e+06
0.701_298.1596		C16 H26 O3 S	298.16	0.701						level5					2.86463e+06	2.88419e+06	2.79219e+06	2.88482e+06	3.24325e+06	2.67714e+06	2.8714e+06	2.9179e+06	3.14914e+06	2.57188e+06	3.05688e+06	1.82e+06	5.36599e+06	5.13604e+06	2.47636e+06	4.89071e+06	3.44843e+06	611820	1.43428e+06	4.11204e+06	2.4735e+06	2.84026e+06	3.68041e+06	2.64928e+06	1.2961e+07	3.36145e+06
0.701_584.3928		C27 H61 N4 O3 P S2	584.393	0.701						level5					1.86749e+06	1.90059e+06	1.62914e+06	1.94247e+06	1.95684e+06	1.73876e+06	1.83464e+06	1.91267e+06	1.74346e+06	1.74568e+06	2.00786e+06	1.94432e+06	2.07497e+06	1.7506e+06	2.00773e+06	2.07247e+06	3.08292e+06	1.38642e+06	2.22419e+06	2.78598e+06	2.61006e+06	1.64289e+06	1.82688e+06	1.83112e+06	2.16151e+06	2.18395e+06
0.702_424.2977	(1r,3s,5z)-5-[(2e)-2-{(1r,3as,7ar)-1-[(2r,3e,5e,7e)-9-hydroxy-3,5,7-nonatrien-2-yl]-7a-methyloctahydro-4h-inden-4-ylidene}ethylidene]-4-methylene-1,3-cyclohexanediol	C28 H40 O3	424.298	0.702		S7826400				level4					964091	1.04126e+06	965598	1.04723e+06	1.02255e+06	974822	1.00417e+06	983264	982482	954856	1.09455e+06	413655	2.22342e+06	623314	422438	412292	1.22021e+06	875595	3.66959e+06	1.14866e+06	3.72442e+06	402324	401031	578759	1.09347e+06	1.14841e+06
0.702_444.2539		C24 H44 O S3	444.254	0.702						level5					7.82317e+06	8.09324e+06	8.01821e+06	8.72192e+06	7.8286e+06	7.95764e+06	7.97182e+06	8.13473e+06	8.18391e+06	7.81985e+06	8.22331e+06	8.63772e+06	6.73141e+06	7.538e+06	1.0156e+07	1.04242e+07	8.84701e+06	8.28616e+06	1.01571e+07	9.25963e+06	9.75114e+06	8.5106e+06	8.39783e+06	8.23759e+06	7.94498e+06	1.09801e+07
0.702_533.443		C33 H59 N O4	533.443	0.702						level5					763155	780853	743974	725602	821401	739529	763373	714331	829609	736447	775623	962723	709831	999702	888979	1.1082e+06	900329	622979	643440	773912	771164	776725	687962	841442	831529	783329
0.702_624.5084		C37 H64 N6 O2	624.508	0.702						level5					720521	726440	968196	789687	758215	790860	765541	835390	645598	840246	849052	773844	1.49331e+06	383449	749642	953271	526843	1.67532e+06	1.54914e+06	306823	672619	1.3531e+06	1.25501e+06	281222	527249	1.28583e+06
0.703_384.3022		C26 H40 O2	384.302	0.703						level5					3.29633e+06	3.76987e+06	3.29304e+06	3.817e+06	3.36998e+06	3.31879e+06	3.57602e+06	3.39154e+06	3.5273e+06	3.19919e+06	3.81846e+06	142145	6.85117e+06	2.60984e+06	122361	205520	2.61743e+06	1.10191e+07	5.30336e+06	2.55653e+06	4.57511e+06	140071	122059	1.72704e+06	8.84095e+06	1.51986e+06
0.703_470.3019	(1s,3r,5z,7e,25s)-26,26,26-trifluoro-9,10-secocholesta-5,7,10-triene-1,3,25-triol	C27 H41 F3 O3	470.302	0.703		S7826318				level4					348576	391461	370959	382056	414953	356324	373156	377274	367098	369016	401508	13822.7	645078	23986.9	16607.7	16869.5	430967	76971.6	2.73466e+06	508802	1.8543e+06	16435.9	19261.9	88255.3	81359.5	447041
0.703_679.6128		C43 H77 N5 O	679.613	0.703						level5					738622	700168	687858	814550	700907	719647	720336	736945	771444	678537	727469	1.76282e+06	1.80294e+06	1.86329e+06	1.66949e+06	2.13222e+06	1.10755e+06	1.20786e+06	779559	603268	325316	1.79855e+06	819130	2.30697e+06	1.16444e+06	1.74251e+06
0.707_402.2551		C28 H34 O2	402.255	0.707						level5					1.59608e+06	1.69275e+06	1.66088e+06	1.77088e+06	1.58663e+06	1.64809e+06	1.664e+06	1.5563e+06	1.69465e+06	1.66557e+06	1.7011e+06	11918.5	4.1016e+06	987414	14860.1	16301.5	1.65896e+06	4.93945e+06	2.04688e+06	1.50282e+06	1.44219e+06	15107.9	16564.5	572184	3.70298e+06	759766
0.707_609.5324		C37 H71 N O5	609.532	0.707						level5					797088	861582	888212	916486	871031	928058	822783	919871	852686	830160	886314	1.29422e+06	1.45025e+06	2.46388e+06	1.01517e+06	1.62573e+06	1.50902e+06	1.51073e+06	1.96246e+06	1.39828e+06	855856	1.60042e+06	978126	1.32857e+06	1.63161e+06	1.05246e+06
0.707_652.4527		C33 H60 N6 O7	652.453	0.707						level5					328169	539460	365776	429800	432385	587383	377864	532539	430923	365914	392710	407403	425745	106001	436287	278096	319014	772544	313642	360155	215583	2.31009e+06	1.80716e+06	713360	1.02763e+06	1.06764e+06
0.707_656.429	Enalkiren	C35 H56 N6 O6	656.429	0.707	C07466	S54622				level4				NULL	8.12523e+06	7.00442e+06	8.01683e+06	7.50616e+06	7.74314e+06	7.49075e+06	7.78269e+06	7.63888e+06	7.86725e+06	7.38502e+06	7.73585e+06	1.49048e+07	8.30386e+06	9.76518e+06	8.87133e+06	1.48984e+07	9.17992e+06	7.30119e+06	7.48926e+06	7.54154e+06	8.29509e+06	9.2392e+06	8.44297e+06	9.00903e+06	8.25776e+06	9.91102e+06
0.708_462.3699		C29 H50 O4	462.37	0.708						level5					2.04568e+06	1.93701e+06	1.9956e+06	2.18111e+06	2.10575e+06	2.06207e+06	2.11024e+06	2.05254e+06	1.91045e+06	2.02976e+06	2.17399e+06	2.26732e+06	2.71669e+06	2.63509e+06	2.94122e+06	5.39023e+06	2.54944e+06	1.8515e+06	2.6409e+06	2.29205e+06	2.208e+06	2.12498e+06	1.33156e+06	1.97568e+06	2.75832e+06	2.53298e+06
0.708_660.4603		C42 H65 N2 P S	660.46	0.708						level5					689031	747824	719339	585124	756179	689184	700957	750973	720106	632321	699021	770587	1.08931e+06	376683	490118	791138	422995	486307	493144	279820	466162	862355	1.37921e+06	1.23629e+06	861598	1.32767e+06
0.708_682.5876		C39 H79 N4 O3 P	682.588	0.708						level5					966166	997814	845877	1.02004e+06	952542	954988	954405	962083	932573	967440	957003	2.49148e+06	1.13246e+06	1.43639e+06	1.4349e+06	1.61209e+06	927800	1.17633e+06	1.16076e+06	870608	637069	2.71203e+06	1.39474e+06	3.19166e+06	2.56494e+06	1.46697e+06
0.709_403.3452	(5z,8z,11z,14z)-n-(2-hydroxyethyl)-17,17-dimethyl-5,8,11,14-docosatetraenamide	C26 H45 N O2	403.345	0.709		S4446583				level4					226181	198467	189690	254759	182971	187031	216060	231007	240540	158322	216964	20965	482899	34762.5	27366.6	30639.6	909560	708130	345385	776650	257312	27681.5	37543.1	25071.6	768956	109804
0.709_506.3708		C23 H51 N6 O4 P	506.371	0.709						level5					551102	555234	547579	542802	582758	532983	548172	546168	606999	513190	557263	358977	371438	788849	846602	1.32543e+06	634440	703070	348491	379207	213303	52911.3	347098	321203	411849	816858
0.71_568.3981		C27 H61 N4 O2 P S2	568.398	0.71						level5					9.1217e+06	9.11945e+06	9.10218e+06	9.22331e+06	9.07054e+06	9.12523e+06	9.12984e+06	9.11194e+06	9.20896e+06	9.02607e+06	9.16133e+06	9.73655e+06	1.08511e+07	1.08741e+07	1.12677e+07	1.23468e+07	1.47823e+07	8.45483e+06	1.10266e+07	1.33679e+07	1.11717e+07	1.14355e+07	8.52266e+06	1.12341e+07	1.31373e+07	1.3242e+07
0.71_708.6028		C41 H81 N4 O3 P	708.603	0.71						level5					2.91979e+06	3.25237e+06	3.13929e+06	2.66811e+06	3.141e+06	3.04185e+06	3.05018e+06	2.94561e+06	2.82975e+06	3.32662e+06	2.9671e+06	6.50748e+06	3.40921e+06	3.93256e+06	4.41861e+06	3.57877e+06	4.35092e+06	5.20881e+06	4.34335e+06	2.95914e+06	3.31857e+06	3.15614e+06	4.38539e+06	3.36629e+06	6.1279e+06	4.32509e+06
0.712_462.3083		C22 H48 N4 P2 S	462.308	0.712						level5					159113	157991	100885	164978	176872	139225	141811	154031	158068	133675	152466	40491.8	87991.2	64091.9	49677.8	56774.9	305927	237605	113092	457505	110534	46984.2	22289.7	8242.44	196244	81038.6
0.712_607.5167		C37 H69 N O5	607.517	0.712						level5					1.08001e+06	1.10389e+06	1.37938e+06	1.2692e+06	1.02633e+06	1.00813e+06	1.12965e+06	1.23057e+06	1.029e+06	1.29019e+06	1.11606e+06	1.36289e+06	1.92936e+06	1.85987e+06	1.55203e+06	1.48527e+06	973063	2.89338e+06	3.13147e+06	765392	1.4264e+06	2.28288e+06	2.65529e+06	1.16792e+06	1.20825e+06	1.81138e+06
0.713_681.5846		C48 H75 N O	681.585	0.713						level5					1.45355e+06	1.5605e+06	1.3361e+06	1.50378e+06	1.32653e+06	1.47384e+06	1.49275e+06	1.48983e+06	1.3071e+06	1.45211e+06	1.49638e+06	3.13284e+06	1.7303e+06	1.87778e+06	2.07503e+06	2.54476e+06	1.55665e+06	1.90195e+06	1.94635e+06	1.38359e+06	1.10402e+06	2.47875e+06	2.25448e+06	3.28509e+06	3.24419e+06	2.15492e+06
0.713_691.6128			691.613	0.713						level5					8.04706e+06	7.39486e+06	7.56372e+06	8.00059e+06	6.94834e+06	7.37217e+06	7.64076e+06	8.23603e+06	8.11985e+06	5.92473e+06	8.4768e+06	1.73115e+07	1.14006e+07	1.91101e+07	1.28718e+07	1.07988e+07	8.66367e+06	1.64658e+07	1.13938e+07	7.24795e+06	7.29879e+06	1.09521e+07	1.01598e+07	1.16917e+07	1.25813e+07	1.30232e+07
0.713_820.5058		C49 H73 O8 P	820.506	0.713						level5					689112	688896	687193	752490	667284	691036	697553	694202	696310	720672	673878	132732	94108.2	7.93684e+06	374831	887259	1.56077e+06	388818	306949	1.37067e+06	291897	1.87535e+06	114223	306417	104967	393941
0.714_600.5073		C35 H64 N6 O2	600.507	0.714						level5					1.62246e+06	1.32154e+06	1.40239e+06	1.3826e+06	1.76475e+06	1.20499e+06	1.54374e+06	1.40392e+06	1.40136e+06	1.53188e+06	1.52088e+06	1.83588e+06	1.61071e+06	1.45196e+06	1.82455e+06	2.23243e+06	1.26016e+06	778998	1.38543e+06	1.00037e+06	603278	2.66291e+06	1.84375e+06	2.50976e+06	1.49376e+06	1.55656e+06
0.715_397.2974		C26 H39 N O2	397.297	0.715						level5					117921	166382	165896	130078	144777	140026	162514	152802	142634	132024	142451	25135.1	193263	30079.3	28395.9	15460.6	576270	430331	99122	539864	51519.9	92681.3	20733.8	47703.3	319412	82072.8
0.715_575.4579		C32 H67 N O3 P2	575.458	0.715						level5					574970	622401	496776	580544	567843	575520	571603	550131	584633	578674	555908	1.37662e+06	2.10639e+06	4.44329e+06	535267	818209	2.17548e+06	376011	1.06194e+06	1.80265e+06	1.49387e+06	862062	709346	957959	1.73885e+06	631533
0.715_598.4913		C34 H66 N2 O6	598.491	0.715						level5					2.32348e+06	2.30754e+06	2.27187e+06	2.25325e+06	2.32363e+06	2.03092e+06	2.38903e+06	2.21374e+06	2.25464e+06	2.28881e+06	2.3354e+06	2.75798e+06	3.15399e+06	1.61497e+06	1.79455e+06	3.30778e+06	2.76853e+06	2.16215e+06	6.01014e+06	4.46003e+06	3.18715e+06	4.11437e+06	2.63964e+06	3.21583e+06	4.197e+06	2.70686e+06
0.715_665.5958		C41 H79 N O5	665.596	0.715						level5					1.56969e+06	1.58005e+06	1.50484e+06	1.68981e+06	1.47879e+06	1.54585e+06	1.57961e+06	1.55594e+06	1.56197e+06	1.65744e+06	1.48002e+06	4.17709e+06	2.86243e+06	3.31184e+06	3.11942e+06	3.73524e+06	1.77381e+06	1.856e+06	2.42378e+06	1.6431e+06	1.22232e+06	5.81917e+06	2.91012e+06	6.66935e+06	6.21658e+06	3.20905e+06
0.715_693.6279		C42 H84 N3 O2 P	693.628	0.715						level5					2.37393e+06	2.60778e+06	2.45175e+06	2.51305e+06	2.46964e+06	2.51978e+06	2.49229e+06	2.46331e+06	2.64381e+06	2.40845e+06	2.42409e+06	4.93282e+06	3.48544e+06	5.06664e+06	4.28267e+06	4.42993e+06	3.92451e+06	3.46429e+06	2.35299e+06	2.28691e+06	1.90903e+06	4.40427e+06	3.04256e+06	6.51423e+06	3.44947e+06	5.13492e+06
0.717_336.1965		C16 H32 O5 S	336.197	0.717						level5					55839.6	65769.8	49888.7	79095.4	49262	51388.7	67635.8	46615.5	48117	55061.6	85477.2	173019	192628	86507.9	40140.2	48290.8	77055.1	20286.9	56537.7	170057	68828.5	45368.2	80972.1	79952.3	319588	42138.1
0.717_498.3	Cucurbitacin s	C30 H42 O6	498.3	0.717	C08806	S106553				level4	Terpenoids	Triterpenoids (C30)	Cucurbitanes	NULL	929550	736635	772621	844191	814508	785094	803489	871034	793723	780432	837700	637011	434653	1.10039e+06	539483	950438	400838	758902	122495	325947	230250	1.07363e+06	835561	649485	730114	559249
0.717_668.448	[similar to: ethyl myristate; δmass: 412.2078 da]		668.448	0.717						level5					470674	470674	470674	470674	470674	470674	470674	470674	470674	470674	470674	192010	1.03793e+06	416477	1.98703e+06	820061	464245	730672	1.0275e+06	481513	878461	1.19142e+07	2.43416e+06	2.1054e+06	1.89257e+06	2.28458e+06
0.718_166.0085		C8 H6 O2 S	166.008	0.718						level5					4.2824e+06	4.19754e+06	4.28469e+06	4.05886e+06	4.13266e+06	3.95792e+06	4.30148e+06	4.13586e+06	4.02101e+06	4.01824e+06	4.5186e+06	73472.1	1.51677e+07	1.7008e+06	79484.5	71649.3	2.32046e+06	1.02902e+07	8.9779e+06	2.25451e+06	7.91354e+06	61213.9	90790.9	569011	1.19223e+07	3.70898e+06
0.718_520.2576		C26 H48 Cl O2 P3	520.258	0.718						level5					177669	163227	165077	237557	157385	155188	187453	131609	194154	198000	179734	115680	41352.6	47127.6	191615	110140	39478.5	42621.8	154561	93888.8	35552.3	88610	109288	38808.4	88871.5	153872
0.719_284.1171	Metominostrobin	C16 H16 N2 O3	284.117	0.719	C18559	S4588319				level4				NULL	470134	463497	528532	451731	514005	420297	493002	503653	427386	448838	548299	1.98098e+06	1.09879e+06	2.75546e+06	1.33292e+06	1.62088e+06	2.61079e+06	1.41173e+06	326526	3.23974e+06	638637	2.18649e+06	1.27684e+06	1.03186e+06	969157	2.26735e+06
0.719_390.24	Compactin	C23 H34 O5	390.24	0.719	C13963	S58262				level4					1.54193e+06	1.52351e+06	1.67517e+06	1.74864e+06	1.74938e+06	1.49857e+06	1.56333e+06	1.8003e+06	1.60999e+06	1.45899e+06	1.72453e+06	2.29594e+06	2.60727e+06	1.38151e+06	1.665e+06	1.44997e+06	1.60115e+06	1.59895e+06	1.81539e+06	1.93797e+06	1.51301e+06	2.59189e+06	2.79048e+06	2.23806e+06	2.49342e+06	2.84917e+06
0.719_401.3288		C20 H44 N5 O P	401.329	0.719						level5					1.64465e+06	1.72279e+06	1.58334e+06	1.83475e+06	1.63528e+06	1.64293e+06	1.65524e+06	1.67718e+06	1.76019e+06	1.68221e+06	1.61539e+06	34346.2	2.27538e+06	432185	60293.8	49089.7	3.94265e+06	6.62119e+06	1.57759e+06	4.07051e+06	1.10538e+06	51754.5	105241	125248	2.42024e+06	589130
0.719_478.3281	10-(3,4-dihydroxy-6-methyl-5-methylene-2-heptanyl)-5,6-dihydroxy-7a,9a-dimethylhexadecahydro-3h-benzo[c]indeno[5,4-e]oxepin-3-one	C28 H46 O6	478.328	0.719		S35013700	HMDB0034086			level4	Organic oxygen compounds	Organooxygen compounds	Alcohols and polyols		996694	1.02004e+06	970562	1.02211e+06	995392	986500	983466	1.0067e+06	1.06775e+06	1.03363e+06	913755	621042	1.46993e+06	532437	917826	804974	1.42549e+06	1.35152e+06	1.23968e+06	1.49852e+06	1.20759e+06	1.0389e+06	1.09363e+06	1.65431e+06	1.70554e+06	1.54645e+06
0.719_569.501		C34 H67 N O5	569.501	0.719						level5					307893	371122	347986	416499	289928	326301	349190	329606	380101	346037	318071	543306	1.01563e+06	756886	460656	1.07285e+06	593840	138804	269660	321594	347652	624418	225515	931535	678229	567652
0.719_689.5964		C37 H80 N5 O4 P	689.596	0.719						level5					658751	674978	675071	699261	714320	630029	660064	703348	750404	650930	638920	1.10787e+06	1.16751e+06	1.0293e+06	871250	879957	1.08271e+06	868590	1.15111e+06	897831	884747	1.33311e+06	1.23715e+06	1.18621e+06	1.26937e+06	974168
0.72_222.1615	2,6-di-tert-butylhydroquinone	C14 H22 O2	222.161	0.72		S68075	HMDB0040178			level4	Benzenoids	Benzene and substituted derivatives	Phenylpropanes		240467	240467	240467	240467	240467	240467	240467	240467	240467	240467	240467	149052	203962	134868	235690	414168	188835	221219	195693	134623	147163	198613	1.35624e+06	105858	248974	299651
0.72_279.0071		C4 H9 N O13	279.007	0.72						level5					824381	1.02585e+06	826217	1.14201e+06	800391	567680	1.04812e+06	647039	955251	944658	986924	396141	602276	381709	260928	345947	2.41928e+06	179043	2.21849e+06	2.78736e+06	3.11582e+06	269091	271191	199618	209821	326604
0.72_418.3288		C23 H46 O6	418.329	0.72						level5					806731	843204	782533	832623	723787	798759	799023	800728	801536	859877	741005	455902	1.11845e+06	683700	1.10219e+06	1.66278e+06	1.12432e+06	794576	1.29964e+06	1.28262e+06	847399	629245	552828	1.71289e+06	1.35092e+06	1.66686e+06
0.72_504.3554		C23 H49 N6 O4 P	504.355	0.72						level5					396096	423529	423932	390436	424083	414035	409986	397702	407362	443989	395737	123448	436390	358257	401188	759808	466404	698858	359369	537920	235358	273847	1.08967e+06	344215	702063	730064
0.72_583.5173		C36 H65 N5 O	583.517	0.72						level5					2.50493e+06	2.60455e+06	2.56552e+06	2.58107e+06	2.50993e+06	2.55392e+06	2.55298e+06	2.55982e+06	2.55183e+06	2.52498e+06	2.57615e+06	3.55436e+06	4.97471e+06	5.53539e+06	3.84959e+06	5.13106e+06	3.6072e+06	1.86333e+06	2.22233e+06	2.25997e+06	1.17348e+06	5.41447e+06	2.03108e+06	6.28038e+06	3.139e+06	3.94479e+06
0.721_189.0092	Lanthionine ketimine	C6 H7 N O4 S	189.009	0.721		S118424	HMDB0004823			level4	Organic acids and derivatives	Carboxylic acids and derivatives	Amino acids, peptides, and analogues		1.18442e+06	1.09268e+06	1.1116e+06	1.1863e+06	1.11133e+06	1.12982e+06	1.15163e+06	1.15384e+06	1.09405e+06	1.11828e+06	1.17778e+06	161157	1.7349e+06	197948	115141	200140	5.47545e+06	120032	7.5082e+06	6.65322e+06	1.02374e+07	18394.8	175628	100142	79552.8	306590
0.721_281.002		C8 H11 N O6 S2	281.002	0.721						level5					563604	524777	593470	552484	548882	556071	556287	558059	558998	542694	565338	196077	698540	480621	174348	159049	2.90598e+06	18096.5	2.77665e+06	3.48581e+06	3.91581e+06	13249.7	14391.7	107898	32109.3	232540
0.721_337.3338		C22 H43 N O	337.334	0.721						level5					1.19085e+07	1.19528e+07	1.20613e+07	1.27231e+07	1.15162e+07	1.19982e+07	1.20291e+07	1.2141e+07	1.16052e+07	1.2538e+07	1.18475e+07	1.21548e+07	8.47639e+06	1.22828e+07	1.42551e+07	1.00555e+07	4.77108e+06	6.78709e+06	1.32838e+07	1.11979e+07	9.77142e+06	7.43915e+06	1.19986e+07	8.476e+06	6.16351e+06	8.26577e+06
0.721_414.1883		C24 H30 O4 S	414.188	0.721						level5					174034	177767	209060	203319	238551	175596	195473	215544	206901	168898	201866	184663	82076.4	600718	205075	853416	95047.3	121068	40820.3	87583.4	50212.1	478434	2.17083e+06	313180	137751	537315
0.721_423.3127	(5z,8z,11z,14z)-n-(2-phenoxyethyl)-5,8,11,14-icosatetraenamide	C28 H41 N O2	423.313	0.721		S4446555				level4					2.66894e+06	2.96331e+06	2.77864e+06	3.12396e+06	2.67811e+06	2.60354e+06	2.73352e+06	3.10326e+06	2.97449e+06	2.49837e+06	2.85102e+06	166058	3.95919e+06	911300	171812	136061	8.60198e+06	8.04126e+06	3.28693e+06	1.00908e+07	2.2029e+06	386937	456055	584141	6.03677e+06	1.3738e+06
0.721_438.2469		C21 H34 N4 O6	438.247	0.721						level5					814270	814270	814270	814270	814270	814270	814270	814270	814270	814270	814270	8.51825e+06	7.57987e+06	6.98902e+06	7.4977e+06	8.99445e+06	1.08414e+07	6.30275e+06	5.92591e+06	4.64629e+06	3.63482e+06	1.4745e+07	1.83022e+07	1.95112e+07	2.3271e+06	9.11247e+06
0.721_581.5012		C35 H67 N O5	581.501	0.721						level5					4.55572e+06	5.25276e+06	5.23784e+06	5.33107e+06	4.95213e+06	4.76106e+06	4.74789e+06	5.24189e+06	5.21524e+06	4.85821e+06	4.98004e+06	7.15087e+06	1.03608e+07	7.70201e+06	5.15216e+06	7.17189e+06	1.03428e+07	5.77866e+06	1.72659e+07	1.25828e+07	1.16582e+07	1.05165e+07	7.28904e+06	8.01087e+06	1.04643e+07	7.37662e+06
0.722_243.1829	N-undecanoylglycine	C13 H25 N O3	243.183	0.722		S399857	HMDB0013286			level4	Organic acids and derivatives	Carboxylic acids and derivatives	Amino acids, peptides, and analogues		7.9569e+06	7.88897e+06	8.22472e+06	1.00981e+07	8.03944e+06	6.50115e+06	8.29669e+06	8.47441e+06	7.59899e+06	8.78642e+06	8.35416e+06	1.85496e+07	1.34123e+07	1.62571e+07	8.49369e+06	1.53598e+07	5.67141e+06	8.07001e+06	9.99101e+06	1.23132e+07	7.42806e+06	7.00447e+06	1.33219e+07	2.0486e+07	8.36655e+06	1.29247e+07
0.722_377.2229	2171	C22 H27 N5 O	377.223	0.722		S21979				level4					1.24336e+06	1.0312e+06	1.25394e+06	889501	1.2833e+06	958375	1.15018e+06	1.07824e+06	1.18272e+06	1.23002e+06	1.00591e+06	2.0111e+06	1.64126e+06	1.49755e+06	160454	1.26375e+06	477912	987841	121932	639192	644760	38447.6	2.71398e+06	2.60597e+06	1.19829e+06	789768
0.722_383.3392		C23 H45 N O3	383.339	0.722						level5					9.18168e+06	9.42455e+06	9.34484e+06	9.94241e+06	8.90918e+06	9.34512e+06	9.35475e+06	9.37432e+06	9.17967e+06	9.73374e+06	9.14826e+06	9.60539e+06	6.62566e+06	9.62395e+06	1.10696e+07	7.83625e+06	3.48372e+06	5.27898e+06	1.04874e+07	8.21107e+06	7.51368e+06	5.78146e+06	9.00568e+06	6.94407e+06	4.9103e+06	6.44577e+06
0.722_571.4726		C34 H66 Cl N O3	571.473	0.722						level5					725546	655215	684316	743576	644763	676613	695670	747841	620719	678298	723814	980550	997087	689593	662946	1.43838e+06	888737	901202	1.39251e+06	1.21817e+06	786784	1.31304e+06	806733	1.21967e+06	1.18567e+06	867696
0.723_260.1768	1,9-heptadecadien-4,6-diyn-3,8-diol	C17 H24 O2	260.177	0.723		S4446384				level4					852002	852002	852002	852002	852002	852002	852002	852002	852002	852002	852002	22407.2	1.46066e+06	338237	25061	31784.5	1.43582e+06	2.71565e+06	2.25115e+06	1.45783e+06	1.32236e+06	17508.5	136421	251160	2.80217e+06	521910
0.723_375.313	Docosatetraenoylethanolamide	C24 H41 N O2	375.313	0.723	C13829	S4445444	HMDB0013626			level4	Organic nitrogen compounds	Organonitrogen compounds	Amines	NULL	1.91659e+06	1.99691e+06	1.94337e+06	2.12168e+06	2.12477e+06	1.85376e+06	1.99082e+06	2.11811e+06	1.87959e+06	2.0347e+06	2.01693e+06	59400.9	3.05931e+06	563986	48403.6	68509.8	7.15539e+06	6.39931e+06	2.7178e+06	6.70023e+06	2.01314e+06	136026	252123	83955.8	4.45112e+06	989078
0.723_382.2461		C20 H34 N2 O5	382.246	0.723						level5					54406.4	68209	61360.5	73821.2	57775.7	78389.5	62056.3	64398.6	56261.6	69980.6	62911.4	97705.9	16576.2	12207.5	15063.9	11140.8	24426.3	21379.6	18112.3	11941.1	22471.6	129895	103527	395439	17942.1	318562
0.723_399.3129		C26 H41 N O2	399.313	0.723						level5					4.79373e+06	4.90269e+06	4.67651e+06	5.04496e+06	4.73033e+06	4.82633e+06	4.82606e+06	4.84249e+06	4.79789e+06	4.83693e+06	4.8352e+06	1.00026e+06	7.19629e+06	1.93787e+06	188254	773478	2.21513e+07	1.27313e+07	4.03105e+06	2.08864e+07	3.40494e+06	445444	674513	1.14295e+06	7.90457e+06	2.84956e+06
0.724_249.0121	Erdosteine	C8 H11 N O4 S2	249.012	0.724		S59073				level4					164742	164742	164742	164742	164742	164742	164742	164742	164742	164742	164742	24153.5	250255	77946.8	17989.6	42175.3	2.5862e+06	188027	1.02788e+06	2.29072e+06	1.58922e+06	12461.4	8889.42	18533.1	35581.4	49321.6
0.724_444.3084	1-stearyl estercitric acid	C24 H44 O7	444.308	0.724		S9786768	HMDB0032521			level4	Organic acids and derivatives	Carboxylic acids and derivatives	Tricarboxylic acids and derivatives		1.14393e+07	1.21845e+07	1.20198e+07	1.30894e+07	1.18261e+07	1.1744e+07	1.17571e+07	1.25207e+07	1.18146e+07	1.20451e+07	1.20686e+07	5.61953e+06	1.22696e+07	7.10625e+06	1.12762e+07	1.20223e+07	1.67599e+07	2.39236e+07	1.4689e+07	1.55183e+07	1.13246e+07	5.62085e+06	3.73016e+06	1.18156e+07	1.27602e+07	1.47834e+07
0.724_776.537		C40 H76 N2 O12	776.537	0.724		S30791798				level4					1.09526e+06	959376	1.03451e+06	1.1645e+06	907848	1.02773e+06	1.03249e+06	1.03572e+06	1.11674e+06	1.00356e+06	977681	33911.4	1.44749e+06	1.10271e+07	81001.5	1.30226e+06	6.09607e+06	238563	3.55408e+06	4.52329e+06	6.81711e+06	3.70834e+06	29882.8	147365	30570.7	193805
0.725_364.2277		C19 H40 S3	364.228	0.725						level5					1.69984e+06	1.76212e+06	1.72242e+06	1.72769e+06	1.76667e+06	1.71041e+06	1.73916e+06	1.72309e+06	1.80671e+06	1.69044e+06	1.71598e+06	1.94468e+06	2.08418e+06	1.67582e+06	3.16823e+06	2.31546e+06	1.97916e+06	1.75446e+06	1.4669e+06	2.04275e+06	1.14711e+06	1.98003e+06	2.23805e+06	2.35768e+06	2.12326e+06	2.87761e+06
0.725_375.2514		C21 H33 N3 O3	375.251	0.725						level5					6.3077e+06	6.90961e+06	6.51567e+06	6.83509e+06	6.83799e+06	6.46545e+06	6.73245e+06	6.56059e+06	7.18798e+06	6.03338e+06	6.8725e+06	3.3533e+07	6.46467e+07	9.07331e+07	1.38319e+08	9.19789e+07	9.83528e+07	4.73961e+07	3.53479e+07	5.77049e+07	6.86077e+07	1.91558e+08	1.26147e+08	9.47286e+07	5.10672e+07	1.02715e+08
0.725_460.3759		C26 H52 O6	460.376	0.725						level5					1.96555e+06	1.79854e+06	1.90855e+06	2.0995e+06	1.88693e+06	1.9015e+06	1.90871e+06	1.82474e+06	1.99314e+06	1.80903e+06	2.07398e+06	2.48168e+06	3.10486e+06	2.26715e+06	3.29425e+06	4.64679e+06	2.26492e+06	1.76797e+06	3.06361e+06	1.91855e+06	2.14429e+06	1.71716e+06	1.2565e+06	2.95011e+06	3.17053e+06	2.63358e+06
0.725_480.3802		C29 H52 O5	480.38	0.725						level5					1.14331e+06	1.17135e+06	1.06272e+06	1.26447e+06	1.23626e+06	1.03429e+06	1.12946e+06	1.18822e+06	1.2177e+06	1.21698e+06	1.0653e+06	1.47264e+06	1.72592e+06	1.34698e+06	1.5094e+06	2.48316e+06	856181	1.43892e+06	490228	887430	328835	1.94419e+06	1.9372e+06	1.50897e+06	1.57915e+06	1.90575e+06
0.725_736.5404		C36 H79 N6 O3 P3	736.54	0.725						level5					167737	200707	149724	221171	181409	190364	193432	216814	131433	235912	164606	25918.7	587750	466385	32383	139576	1.43738e+06	26492.1	1.55179e+06	1.48311e+06	3.28017e+06	61599.8	24231	32308.4	24888.3	44411
0.726_422.3236		C22 H46 O7	422.324	0.726						level5					1.20315e+08	1.23084e+08	1.19153e+08	1.23099e+08	1.20313e+08	1.21165e+08	1.21162e+08	1.21313e+08	1.20997e+08	1.21198e+08	1.21238e+08	2.01359e+08	1.6835e+08	2.1964e+08	1.16123e+08	2.46419e+08	1.38892e+08	8.8978e+07	1.48158e+08	1.54601e+08	1.08496e+08	1.38039e+08	1.71243e+08	1.92239e+08	1.21935e+08	2.3788e+08
0.726_458.3597		C22 H46 N6 O4	458.36	0.726						level5					925360	951670	951602	967508	841931	925827	924898	952950	917558	948645	901767	1.00221e+06	1.27585e+06	204722	3.83375e+06	1.07006e+06	885080	1.01061e+06	969286	815868	796861	432805	683064	2.61434e+06	1.20406e+06	1.36242e+06
0.726_530.2863	Proscillaridin	C30 H42 O8	530.286	0.726	C12816	S4447658				level4	Steroids	24-Carbon atoms	Bufanolide derivatives [Fig]	NULL	9.26187e+06	9.56808e+06	9.84539e+06	9.82486e+06	1.0081e+07	8.25595e+06	9.77319e+06	9.64832e+06	1.01143e+07	9.37897e+06	9.38119e+06	5.63562e+06	4.01536e+06	3.8391e+06	1.14372e+07	6.93899e+06	4.54823e+06	3.07694e+06	5.14055e+06	5.846e+06	3.33626e+06	5.07475e+06	4.95442e+06	3.44977e+06	6.45172e+06	9.38618e+06
0.728_348.1782	Suberic acid	C8 H14 O4	348.178	0.728	C08278	BGI524	HMDB0000893	60.7		level1	Organic acids	Carboxylic acids [Fig]	Dicarboxylic acids	NULL	5.62387e+06	5.62387e+06	5.62387e+06	5.62387e+06	5.62387e+06	5.62387e+06	5.62387e+06	5.62387e+06	5.62387e+06	5.62387e+06	5.62387e+06	5.22174e+06	5.67004e+06	6.51077e+06	6.92e+06	7.06831e+06	6.81522e+06	4.4853e+06	6.79442e+06	6.30815e+06	5.72335e+06	6.4408e+06	6.34849e+06	5.09164e+06	5.32883e+06	7.86642e+06
0.729_308.165		C14 H28 O5 S	308.165	0.729						level5					89063.7	67747	96598.9	50187.3	103464	80475.1	80038	75680.5	65606.8	87500.1	86483.1	186151	576124	63972.9	34848.5	128738	122049	25467.3	186772	112822	423026	54575.4	293715	31228.6	668505	51553.7
0.73_416.3129		C19 H40 N6 O4	416.313	0.73						level5					499604	425397	476841	596540	499356	511333	496003	507960	603611	434805	458993	172401	779513	174979	1.34573e+06	375325	708556	1.05734e+06	657144	761840	417313	118462	167266	264922	396269	492226
0.73_432.3443		C20 H44 N6 O4	432.344	0.73						level5					3.04302e+06	2.91967e+06	3.13241e+06	3.02836e+06	2.98967e+06	3.01956e+06	3.02342e+06	3.01354e+06	3.07871e+06	2.94419e+06	3.05123e+06	5.31517e+06	5.31371e+06	4.36333e+06	5.52841e+06	7.61463e+06	3.31207e+06	2.16374e+06	4.76794e+06	3.72081e+06	3.20743e+06	3.58533e+06	4.01111e+06	7.75027e+06	5.98708e+06	5.43702e+06
0.73_588.2608		C26 H47 N4 O3 P3 S	588.261	0.73						level5					84104.4	109083	80810.8	119432	79544.3	93133.8	93678.4	90155.8	101499	90223	91315.9	82501.8	3.91024e+06	662572	550963	831102	1.30678e+07	64973	6.3029e+06	9.91032e+06	2.05846e+07	84782.3	155674	340579	172036	671491
0.731_373.2975	(5z,8z,11z,14z)-1-(4-morpholinyl)-5,8,11,14-icosatetraen-1-one	C24 H39 N O2	373.298	0.731		S4446553				level4					410874	395140	409000	447554	385199	408793	408956	413569	404379	401143	417513	136945	502654	125646	141487	105590	607920	1.81983e+06	536813	798530	234695	261807	432041	69763.6	520285	264496
0.732_375.0594		C19 H13 N5 S2	375.059	0.732						level5					97741	169302	112375	140825	152207	91056.8	126681	116540	117048	151494	130934	26315	2.14671e+06	40592.7	33328.6	31787.9	74019.7	1.59288e+06	294109	132100	440386	25264.2	32484.3	29543.5	436912	135032
0.732_654.3086		C34 H48 N4 O5 P2	654.309	0.732						level5					7.13498e+06	7.50121e+06	6.93403e+06	7.68362e+06	7.03027e+06	7.24557e+06	7.25961e+06	7.25004e+06	7.13469e+06	7.48185e+06	7.14135e+06	1.33511e+07	9.99622e+06	1.74429e+07	5.14619e+06	1.2822e+07	8.51371e+06	7.351e+06	7.00006e+06	8.73063e+06	8.05667e+06	8.80007e+06	1.01841e+07	8.73724e+06	4.19455e+06	9.26476e+06
0.733_421.2564		C18 H41 N5 P2 S	421.256	0.733						level5					3.82958e+06	4.98957e+06	4.91814e+06	5.25352e+06	5.59085e+06	3.29168e+06	4.8312e+06	4.95188e+06	5.13075e+06	4.8207e+06	4.23163e+06	2.80488e+07	1.71669e+07	4.87006e+07	4.24001e+07	2.25647e+07	2.8764e+07	2.96644e+07	1.44903e+07	2.15403e+07	2.47851e+07	6.57933e+07	4.36861e+07	5.06544e+07	1.65355e+07	2.66953e+07
0.734_304.1666	Prosolanapyrone ii	C18 H24 O4	304.167	0.734	C19933	S9997508				level4				NULL	273925	228615	294685	261925	248742	247481	260647	251018	273461	225587	293092	30342.4	366516	121907	32310.3	38544.9	126196	713057	381508	86552.1	239644	24927.1	141893	175539	691768	220697
0.734_408.2513	Asebotoxin ii	C23 H36 O6	408.251	0.734	C09063	S390562				level4	Terpenoids	Diterpenoids (C20)	Grayanoids	NULL	198056	171783	140090	192831	179440	167618	173600	170324	224279	152253	163435	226526	164125	92363.9	166468	130090	72719.6	209779	93166.6	94162.2	94920.8	835651	564478	526199	182927	538792
0.734_452.3132		C19 H44 N6 O4 S	452.313	0.734						level5					2.4292e+06	2.31018e+06	2.5039e+06	2.64271e+06	2.38734e+06	2.37949e+06	2.30281e+06	2.67355e+06	2.49138e+06	2.22013e+06	2.51132e+06	804028	3.16603e+06	726509	2.15153e+06	1.47674e+06	4.9234e+06	4.96505e+06	8.63523e+06	4.94062e+06	6.08835e+06	872722	688415	2.39917e+06	2.09363e+06	2.69748e+06
0.735_213.009	3-indoxyl sulphate	C8 H7 N O4 S	213.009	0.735		MReference-1303	HMDB0000682	53.6	94.2	level2	Organic acids and derivatives	Organic sulfuric acids and derivatives	Arylsulfates		3.09333e+07	3.27921e+07	3.05387e+07	3.13191e+07	3.17294e+07	3.09962e+07	3.27963e+07	3.17579e+07	3.04164e+07	3.15507e+07	3.16021e+07	3.7262e+06	7.3272e+07	1.0011e+07	4.18916e+06	7.78185e+06	2.01975e+08	847899	1.98103e+08	2.16376e+08	3.24632e+08	528157	399160	2.77657e+06	1.90805e+06	1.11925e+07
0.735_432.19		C22 H28 N2 O7	432.19	0.735						level5					37837.3	41103.6	36767.6	41115.2	38354.2	38676.5	38855.1	38526.8	42123.3	37802.5	37748	37539.4	606768	1.14851e+06	50625	47122.5	98294.6	44307.5	110147	106784	125411	38304.1	635014	1.17827e+06	41083.1	519885
0.735_450.2982		C20 H43 N4 O5 P	450.298	0.735						level5					5.79218e+06	6.21257e+06	5.70913e+06	6.18011e+06	5.91276e+06	5.72662e+06	5.80138e+06	6.14733e+06	5.75329e+06	5.75264e+06	6.21002e+06	2.4818e+06	6.25734e+06	2.80266e+06	6.61332e+06	4.18681e+06	1.11483e+07	1.22327e+07	1.07127e+07	1.21515e+07	7.36837e+06	3.54163e+06	1.30589e+06	7.89015e+06	7.99804e+06	6.80614e+06
0.736_366.2223		C21 H34 O3 S	366.222	0.736						level5					1.55823e+06	1.84868e+06	1.63489e+06	1.63904e+06	1.71106e+06	1.64672e+06	1.67387e+06	1.66533e+06	1.80414e+06	1.58727e+06	1.64867e+06	1.8689e+06	1.69475e+06	1.43062e+06	2.4769e+06	2.01683e+06	1.82613e+06	1.82231e+06	1.40868e+06	1.88732e+06	1.01471e+06	1.90164e+06	1.89299e+06	2.00943e+06	1.90694e+06	2.70291e+06
0.736_404.313		C22 H44 O6	404.313	0.736						level5					1.20995e+08	1.23722e+08	1.19826e+08	1.23766e+08	1.20978e+08	1.21831e+08	1.21828e+08	1.21972e+08	1.2168e+08	1.21845e+08	1.21908e+08	2.02488e+08	1.68938e+08	2.20924e+08	1.16835e+08	2.47478e+08	1.40088e+08	8.89209e+07	1.49834e+08	1.56158e+08	1.10114e+08	1.38851e+08	1.72333e+08	1.9337e+08	1.22323e+08	2.38851e+08
0.737_364.2244	Tetrahydrocortisone	C21 H32 O5	364.224	0.737	C05470	S5657	HMDB0000903			level4	Hormones and transmitters	Steroid hormones	Glucocorticoids	map00140 Steroid hormone biosynthesis;	3.0546e+06	2.90656e+06	3.36296e+06	3.29829e+06	3.34346e+06	2.80577e+06	3.29368e+06	3.36597e+06	3.33348e+06	2.90857e+06	3.06631e+06	3.45144e+06	1.68336e+06	3.31292e+06	2.91352e+06	3.6727e+06	2.89254e+06	2.62481e+06	1.73442e+06	2.66264e+06	1.63033e+06	3.31083e+06	3.62868e+06	3.77062e+06	3.43886e+06	2.39942e+06
0.737_394.2842		C21 H43 Cl O4	394.284	0.737						level5					5.38269e+06	5.50356e+06	5.2915e+06	5.53229e+06	6.04721e+06	5.18139e+06	5.51557e+06	6.0151e+06	5.11434e+06	5.28257e+06	5.75652e+06	9.09485e+06	5.14076e+06	8.42888e+06	3.68887e+06	8.91898e+06	5.11318e+06	3.14167e+06	8.6975e+06	8.48724e+06	4.63062e+06	4.34041e+06	9.44849e+06	6.55805e+06	4.94575e+06	8.1202e+06
0.737_426.2978		C25 H38 N4 O2	426.298	0.737						level5					1.1298e+07	1.20231e+07	1.18249e+07	1.29093e+07	1.1628e+07	1.16012e+07	1.16128e+07	1.23216e+07	1.16502e+07	1.18424e+07	1.193e+07	5.53674e+06	1.22213e+07	7.02177e+06	1.12852e+07	1.19753e+07	1.6555e+07	2.38806e+07	1.45987e+07	1.52006e+07	1.12088e+07	5.46187e+06	3.65311e+06	1.15864e+07	1.2689e+07	1.47325e+07
0.737_448.2813	16-feruloyloxypalmitic acid	C26 H40 O6	448.281	0.737	C18217	S10252167				level4					3.73418e+07	3.74129e+07	3.71712e+07	3.81902e+07	3.69654e+07	3.73971e+07	3.74072e+07	3.73919e+07	3.72837e+07	3.79555e+07	3.70376e+07	1.51991e+07	4.13307e+07	1.62569e+07	3.81413e+07	3.46082e+07	6.20286e+07	4.41236e+07	6.38755e+07	6.52911e+07	4.69065e+07	2.28965e+07	1.22308e+07	5.69638e+07	4.63582e+07	5.21146e+07
0.738_204.1147	(z)-hex-3-enyl benzoate	C13 H16 O2	204.115	0.738		S4519192	HMDB0033379			level4	Benzenoids	Benzene and substituted derivatives	Benzoic acids and derivatives		196488	241510	241264	249520	222524	211840	222340	281547	249035	184570	220415	23253.8	388505	29093.7	26113.9	23933.7	451125	826672	310253	460127	190119	21263.9	139346	24668.7	151871	110166
0.738_304.2395	Icosa-5,8,11,14-tetraenoic acid	C20 H32 O2	304.24	0.738		S4471967				level4					2.52445e+06	2.64195e+06	2.4867e+06	2.48231e+06	2.5283e+06	2.22485e+06	2.50772e+06	2.66587e+06	2.4005e+06	2.84358e+06	2.25432e+06	1.33006e+06	2.26688e+06	1.26003e+06	1.82823e+06	2.59853e+06	2.90731e+06	3.58048e+06	3.14074e+06	4.21391e+06	2.84883e+06	2.14055e+06	2.32575e+06	2.50202e+06	2.86732e+06	2.89365e+06
0.738_378.2036	Mfcd00273304	C21 H30 O6	378.204	0.738	C15291	S223204				level4				NULL	1.1302e+06	1.09199e+06	987743	1.4271e+06	1.82296e+06	1.08261e+06	1.13576e+06	1.22074e+06	1.09967e+06	1.4259e+06	1.23572e+06	1.15229e+06	1.49519e+06	1.34865e+06	1.56612e+06	1.5884e+06	424963	1.0467e+06	501252	1.0993e+06	200803	2.78389e+06	1.85173e+06	1.67135e+06	1.99945e+06	2.08945e+06
0.738_396.2812		C30 H36	396.281	0.738						level5					1.66444e+06	1.66152e+06	1.59371e+06	1.66848e+06	1.75909e+06	1.63117e+06	1.66278e+06	1.71892e+06	1.61669e+06	1.6403e+06	1.69287e+06	2.25821e+06	2.26758e+06	2.31015e+06	1.34664e+06	3.07152e+06	1.76221e+06	1.01353e+06	2.40387e+06	2.40717e+06	1.31423e+06	1.84633e+06	1.90438e+06	1.74345e+06	1.47227e+06	2.44152e+06
0.738_434.2768		C28 H38 N2 S	434.277	0.738						level5					212389	192187	260714	204241	201039	210846	213844	214503	199412	253082	190224	288715	185846	229586	335572	364041	102368	40061.9	151958	105458	69248.7	708310	708238	228273	120727	172528
0.738_465.2713		C21 H43 N3 O4 S2	465.271	0.738						level5					924394	892656	902997	875246	867452	898407	890258	913926	823925	952773	892328	336922	586273	92791.6	687701	747038	595281	860954	1.25864e+06	1.00405e+06	319321	456193	191480	1.18663e+06	882108	873786
0.739_414.2526		C26 H39 P S	414.253	0.739						level5					1.82994e+06	2.32945e+06	1.95027e+06	2.09479e+06	2.0896e+06	1.85798e+06	2.02347e+06	1.7499e+06	2.42215e+06	1.88502e+06	2.12417e+06	489604	2.01274e+06	747981	1.06259e+06	1.93892e+06	2.89724e+06	3.41277e+06	4.9633e+06	4.08165e+06	1.92456e+06	875984	388366	1.5064e+06	2.85559e+06	1.96292e+06
0.74_166.0086		C8 H6 O2 S	166.009	0.74						level5					4.05559e+06	3.97522e+06	4.05776e+06	3.84388e+06	3.91378e+06	3.74829e+06	4.07366e+06	3.9168e+06	3.80804e+06	3.80542e+06	4.27928e+06	57195.3	1.43643e+07	2.46317e+06	61875.6	55776.3	2.19756e+06	9.74515e+06	8.50239e+06	2.1351e+06	7.49441e+06	50593.3	85982.2	538874	1.12909e+07	3.51254e+06
0.74_416.2689		C23 H41 Cl O4	416.269	0.74						level5					439135	507127	456815	491955	436068	446972	430715	538162	419599	473278	458702	82105.9	483703	169164	266090	361482	334209	695201	632488	761781	262507	104516	54483.9	240873	520713	339204
0.741_343.1049	N-[(2e)-3-(3,4-dihydroxyphenyl)-2-propenoyl]tyrosine	C18 H17 N O6	343.105	0.741		S22546930	HMDB0029295			level4	Organic acids and derivatives	Carboxylic acids and derivatives	Amino acids, peptides, and analogues		342211	312047	366174	346062	346453	333581	342696	345193	335111	337685	347005	29544.5	187741	41617.4	41425.8	39940.6	87612.1	1.70623e+06	850751	126138	280513	32973.6	47846.5	34317.9	1.12564e+06	304665
0.741_383.2584		C22 H38 Cl N O2	383.258	0.741						level5					386071	432456	442644	417943	331122	461333	393116	403067	369909	402378	442866	502978	266201	457229	697916	702514	93027.8	158527	61817.9	149177	56958.2	1.28846e+06	2.64154e+06	195817	432182	334356
0.741_392.2684		C17 H37 Cl N6 O2	392.268	0.741						level5					2.75228e+06	3.25779e+06	2.22156e+06	3.22748e+06	2.73103e+06	2.59044e+06	2.39061e+06	3.20914e+06	2.88283e+06	3.27679e+06	2.22768e+06	586959	3.43367e+06	712236	6.75735e+06	1.49638e+06	4.14245e+06	6.41224e+06	5.29632e+06	5.28327e+06	2.38494e+06	1.1173e+06	526492	1.55367e+06	2.05807e+06	2.21742e+06
0.741_676.4408		C36 H60 N4 O8	676.441	0.741						level5					379487	373292	380482	388926	324469	368420	368875	428667	371763	304509	395466	339393	159552	1.00432e+06	983116	1.13988e+06	89880.3	142802	92532.7	80877.3	173641	235746	299609	216285	1.12075e+06	344610
0.742_282.1247	Erteberel	C18 H18 O3	282.125	0.742		S8461628				level4					500490	553839	462999	556436	530811	519018	514657	494681	556549	509622	515295	151654	1.08899e+06	134499	68807.6	127673	399172	1.35246e+06	3.44785e+06	246427	2.05551e+06	55945.8	59619.6	64753.7	596938	847204
0.742_347.2817	Anandamide	C22 H37 N O2	347.282	0.742	C11695	S4445241	HMDB0004080			level4	Organic nitrogen compounds	Organonitrogen compounds	Amines	map04080 Neuroactive ligand-receptor interaction; map04714 Thermogenesis; map04723 Retrograde endocannabinoid signaling; map04750 Inflammatory mediator regulation of TRP channels;	6.79412e+06	5.42037e+06	6.63305e+06	6.64668e+06	5.63309e+06	5.25187e+06	6.12201e+06	7.00447e+06	5.89235e+06	6.1128e+06	5.90119e+06	8.37868e+06	5.582e+06	8.70744e+06	1.09567e+07	1.07741e+07	3.29383e+06	2.87498e+06	2.90377e+06	3.57676e+06	2.29908e+06	2.12008e+07	3.60192e+07	4.82221e+06	7.09604e+06	7.09414e+06
0.742_398.2666		C16 H39 N4 O5 P	398.267	0.742						level5					736635	710377	762181	762480	690907	727274	737610	732683	731332	743494	720645	436401	942224	347078	885005	492441	1.60925e+06	1.28335e+06	1.08739e+06	1.61921e+06	804799	598562	321127	1.09221e+06	943947	974077
0.742_400.2816		C18 H36 N6 O4	400.282	0.742						level5					3.11575e+07	3.20767e+07	3.19609e+07	3.38797e+07	3.09207e+07	3.14368e+07	3.14369e+07	3.41579e+07	3.11279e+07	3.14254e+07	3.17124e+07	8.47121e+06	5.61841e+07	1.19756e+07	4.37974e+07	1.77733e+07	1.80995e+07	5.27472e+07	7.95065e+07	7.20083e+07	6.0772e+07	2.62404e+07	1.12948e+07	3.9499e+07	4.55777e+07	3.33958e+07
0.742_417.287			417.287	0.742						level5					1.29776e+06	1.58198e+06	1.27768e+06	1.34755e+06	1.35001e+06	1.56564e+06	1.32407e+06	1.42354e+06	1.21236e+06	1.32432e+06	1.57629e+06	1.97145e+06	1.51972e+06	1.48264e+06	1.72942e+06	2.08892e+06	1.4275e+06	723846	1.38246e+06	1.47794e+06	1.28131e+06	3.8893e+06	5.47176e+06	2.03932e+06	1.44115e+06	1.56312e+06
0.742_438.2528		C25 H39 Cl O4	438.253	0.742						level5					1.86968e+06	1.97188e+06	1.92346e+06	1.80805e+06	1.95482e+06	1.88765e+06	1.9103e+06	1.92622e+06	1.8412e+06	1.98682e+06	1.86571e+06	157956	1.70725e+06	84552.2	1.31383e+06	1.77046e+06	1.93109e+06	2.16764e+06	2.8375e+06	3.28103e+06	1.24584e+06	280457	54160.3	1.3126e+06	1.78583e+06	2.1327e+06
0.743_390.2529		C21 H39 Cl O4	390.253	0.743						level5					1.19445e+06	1.26494e+06	1.14723e+06	1.08555e+06	1.30691e+06	1.05647e+06	1.23916e+06	1.41644e+06	1.08434e+06	1.10359e+06	1.20546e+06	156354	2.16574e+06	397618	1.0758e+06	730946	2.24899e+06	1.81177e+06	3.36455e+06	3.01665e+06	1.56619e+06	488045	262017	745221	1.7222e+06	722472
0.744_376.2818		C20 H40 O6	376.282	0.744						level5					3.65567e+07	3.93682e+07	3.57958e+07	3.74168e+07	3.7828e+07	3.72815e+07	3.72505e+07	3.7519e+07	3.73634e+07	3.78619e+07	3.68061e+07	4.46976e+07	5.50771e+07	3.87644e+07	3.93092e+07	4.96632e+07	6.39691e+07	2.97958e+07	8.46206e+07	6.35478e+07	7.67722e+07	3.23473e+07	4.00778e+07	3.86369e+07	3.27754e+07	5.60046e+07
0.744_410.2771		C16 H39 N6 O4 P	410.277	0.744						level5					1.06778e+06	984999	1.0952e+06	1.16953e+06	1.14871e+06	999316	1.07908e+06	1.09868e+06	1.05854e+06	1.14578e+06	1.03905e+06	1.64845e+06	891917	1.61082e+06	2.34988e+06	2.56123e+06	392898	442933	282242	491136	156948	4.32483e+06	6.40988e+06	704377	1.32543e+06	1.11921e+06
0.744_410.2785		C21 H43 Cl O5	410.279	0.744						level5					4.09092e+06	4.56303e+06	3.56972e+06	4.75315e+06	4.20311e+06	3.969e+06	3.82665e+06	4.64489e+06	4.24093e+06	4.7561e+06	3.52401e+06	2.38443e+06	4.80258e+06	2.51434e+06	1.00684e+07	4.42328e+06	5.01567e+06	7.54525e+06	6.02169e+06	6.1769e+06	2.73127e+06	5.77931e+06	7.56241e+06	2.47278e+06	3.68234e+06	3.68959e+06
0.744_444.1986		C21 H32 O10	444.199	0.744						level5					225234	290018	159757	173386	173123	306270	205209	187300	214070	190849	226347	272664	78563.6	918806	413513	1.20389e+06	123887	73075.2	122202	107599	136991	493658	1.61657e+06	387466	127908	298277
0.745_366.253		C19 H39 Cl O4	366.253	0.745						level5					1.16094e+06	1.28541e+06	1.21512e+06	1.29096e+06	1.29511e+06	1.11092e+06	1.23086e+06	1.39816e+06	1.12171e+06	1.22713e+06	1.25109e+06	1.46487e+06	1.17277e+06	1.90061e+06	1.02538e+06	1.06637e+06	1.66397e+06	763864	3.00046e+06	2.28337e+06	2.42872e+06	1.03684e+06	1.17743e+06	1.047e+06	878825	1.21635e+06
0.746_373.3189		C22 H39 N5	373.319	0.746						level5					921365	844704	944754	987203	847089	934599	843272	933530	900103	873420	953153	1.38169e+06	1.55474e+06	2.68081e+06	1.6604e+06	1.86062e+06	885977	786686	794800	1.18288e+06	761695	2.44378e+06	2.41984e+06	1.52439e+06	2.07907e+06	1.09513e+06
0.746_388.293		C22 H45 O P S	388.293	0.746						level5					1.03404e+06	1.03404e+06	1.03404e+06	1.03404e+06	1.03404e+06	1.03404e+06	1.03404e+06	1.03404e+06	1.03404e+06	1.03404e+06	1.03404e+06	1.02736e+06	1.1631e+06	1.27763e+06	1.40745e+06	1.81264e+06	982230	740291	1.06973e+06	975968	698484	1.44207e+06	1.86351e+06	872189	1.24505e+06	1.48835e+06
0.747_308.1404	3-(5-hydroxy-2,2-dimethyl-2h-chromen-6-yl)-1-phenyl-1-propanone	C20 H20 O3	308.14	0.747		S74851793	HMDB0125856			level4	Phenylpropanoids and polyketides	Linear 1,3-diarylpropanoids	Chalcones and dihydrochalcones		238994	257448	211086	253461	244371	240272	239225	241444	235693	253008	232685	17557.6	339475	16956.2	17767.2	20166.2	155200	755579	2.25943e+06	93238.1	1.08132e+06	15739.6	19497.2	16088	418591	540935
0.747_366.2037	Dibutoxyethylphthalate	C20 H30 O6	366.204	0.747	C15438	S8042				level4				NULL	633636	542350	610836	680583	585368	591327	566200	636573	580486	542863	695253	1.13618e+06	551514	343971	324444	282014	223951	454302	359741	207669	229596	1.79755e+06	1.92801e+06	2.18107e+06	591250	1.74258e+06
0.747_388.1991	Trimethobenzamide	C21 H28 N2 O5	388.199	0.747	C07178	S5375	HMDB0014800			level4	Benzenoids	Benzene and substituted derivatives	Benzoic acids and derivatives	NULL	600149	684483	612171	704809	632299	605097	634898	655262	627986	641248	651072	90013.8	408437	159645	32525.9	38955	473060	1.85928e+06	1.61623e+06	459307	957878	424353	405934	935570	2.58579e+06	701135
0.748_149.0331	Ditiocarb	C5 H11 N S2	149.033	0.748	C19150	S8639				level4				NULL	760343	762795	837782	808633	806411	781381	819042	746337	708710	883088	819991	36365.8	1.02563e+06	180352	138789	36963.9	554051	730953	1.08617e+06	467086	1.06476e+06	33132	199922	371400	1.99007e+06	275439
0.748_323.2818	Mfcd00674434	C20 H37 N O2	323.282	0.748		S4446566	HMDB0012252			level4	Organic nitrogen compounds	Organonitrogen compounds	Amines		8.88054e+06	8.84576e+06	7.84766e+06	9.10934e+06	8.40634e+06	8.45671e+06	7.89772e+06	8.87338e+06	8.83616e+06	9.10386e+06	7.99393e+06	8.76519e+06	9.90204e+06	1.08585e+07	1.2304e+07	1.28523e+07	7.20881e+06	3.34519e+06	4.08244e+06	6.25281e+06	4.47268e+06	2.75446e+07	4.18805e+07	7.13549e+06	1.13121e+07	9.38626e+06
0.748_393.2872		C17 H40 N5 O3 P	393.287	0.748						level5					6.25998e+06	4.86906e+06	6.06535e+06	6.09912e+06	5.16499e+06	4.64524e+06	5.443e+06	6.38732e+06	5.44132e+06	5.58813e+06	5.36041e+06	7.70022e+06	5.21428e+06	8.07165e+06	1.02267e+07	9.98432e+06	3.10517e+06	2.66621e+06	2.79094e+06	3.39354e+06	2.1907e+06	1.93856e+07	3.29906e+07	4.56284e+06	6.50018e+06	6.65508e+06
0.749_368.2381		C21 H36 O3 S	368.238	0.749						level5					3.82311e+06	3.4785e+06	3.44118e+06	3.97104e+06	3.54824e+06	2.87154e+06	3.65449e+06	3.71854e+06	3.55701e+06	3.77944e+06	3.42184e+06	4.15442e+06	3.3275e+06	3.21965e+06	4.32766e+06	4.11488e+06	3.78253e+06	2.931e+06	2.85131e+06	3.44356e+06	2.50108e+06	3.22399e+06	4.7906e+06	4.4365e+06	3.91368e+06	4.00385e+06
0.753_155.0217	4-nitrocatechol	C6 H5 N O4	155.022	0.753	C02235	S2745027	HMDB0002916			level4	Benzenoids	Phenols	Nitrophenols		915613	915613	915613	915613	915613	915613	915613	915613	915613	915613	915613	3.06701e+06	968835	364277	484008	434591	394434	705354	964537	318881	544431	583220	135322	3.80614e+06	4.68166e+06	5.59051e+06
0.753_230.1148		C11 H18 O5	230.115	0.753						level5					1.44079e+06	1.43421e+06	1.52614e+06	1.46538e+06	1.53908e+06	1.44278e+06	1.56804e+06	1.53678e+06	1.5398e+06	1.52149e+06	1.31421e+06	2.20312e+06	1.56118e+06	2.58826e+06	2.40513e+06	4.62643e+06	642684	945918	478334	541867	584636	3.63565e+06	6.92989e+06	1.57151e+06	1.16521e+06	1.82065e+06
0.754_274.1409	5-oxidanidyl-5-oxidanylidenenorvalyllysine	C11 H20 N3 O5	274.141	0.754		S35031919				level4					903669	927000	784593	925950	881150	749360	895564	861585	994680	890017	779274	869684	567950	1.38524e+06	1.05394e+06	1.88543e+06	505967	569026	373165	408711	302723	283714	3.18942e+06	1.40357e+06	400253	1.06464e+06
0.754_359.2584		C20 H38 Cl N O2	359.258	0.754						level5					406943	430322	142728	388886	284414	297473	278375	333747	305148	322337	297329	195782	299748	502839	532784	643689	204563	73442.3	128244	286038	97543.1	1.09677e+06	1.51043e+06	296453	355390	390171
0.754_382.2349	Sarcostin	C21 H34 O6	382.235	0.754	C17770	S30791575				level4				NULL	5.98114e+06	6.12888e+06	6.44083e+06	6.24683e+06	6.2069e+06	5.25185e+06	5.62428e+06	6.101e+06	8.55255e+06	5.35192e+06	5.38985e+06	8.05278e+06	3.0514e+06	3.75186e+06	3.46688e+06	3.95958e+06	3.13957e+06	4.6016e+06	5.44641e+06	2.92072e+06	2.18759e+06	1.5044e+07	1.12893e+07	1.77549e+07	4.53172e+06	1.1005e+07
0.755_345.2873		C19 H39 N O4	345.287	0.755						level5					5.40206e+06	5.44003e+06	5.22339e+06	5.86131e+06	5.27353e+06	5.41685e+06	5.38861e+06	5.5432e+06	5.37868e+06	5.50862e+06	5.34188e+06	5.71667e+06	6.51208e+06	1.01245e+07	9.22049e+06	1.02177e+07	4.93186e+06	4.04399e+06	3.05238e+06	4.38489e+06	2.84805e+06	1.43696e+07	1.69449e+07	5.74411e+06	7.73454e+06	6.88273e+06
0.755_369.1205	6-hydroxyprotopine	C20 H19 N O6	369.12	0.755	C05190	S389486				level4	Alkaloids	Alkaloids derived from tyrosine	Isoquinoline alkaloids	map01100 Metabolic pathways;	4.67872e+06	4.51677e+06	4.87305e+06	4.52371e+06	4.84885e+06	4.5509e+06	4.63782e+06	4.62802e+06	4.90325e+06	4.85626e+06	4.36675e+06	18160.5	2.66673e+06	191033	19677.8	21620	1.98774e+06	2.00235e+07	1.49417e+07	1.75135e+06	6.13221e+06	22686.2	19389.7	369396	1.61119e+07	7.00908e+06
0.755_386.2774		C20 H38 N2 O5	386.277	0.755						level5					1.28578e+06	1.31659e+06	1.33488e+06	1.2943e+06	1.29349e+06	1.30522e+06	1.30527e+06	1.29696e+06	1.33297e+06	1.28839e+06	1.30184e+06	1.28859e+06	1.564e+06	1.80579e+06	2.43969e+06	2.17237e+06	1.12359e+06	1.22894e+06	772006	850711	626143	4.60186e+06	4.28111e+06	1.4515e+06	1.75585e+06	1.65272e+06
0.755_466.2919		C19 H42 N6 O5 S	466.292	0.755						level5					486838	560748	559918	568776	683792	519436	555108	513304	596354	626531	516716	1.14306e+06	435175	1.05435e+06	1.22206e+06	994427	528441	382929	205025	458495	165676	879838	630949	718745	388042	307914
0.756_188.0833	(z)-3-butylidenephthalide	C12 H12 O2	188.083	0.756	C16924	S557578	HMDB0032061			level4	Organoheterocyclic compounds	Isocoumarans	Isobenzofuranones	NULL	931526	943982	895607	910584	1.01727e+06	917378	911807	933851	962472	942892	916985	21994.7	411190	468959	19919.8	20933.2	815493	1.47227e+06	3.91163e+06	661248	1.95179e+06	23329.2	18819.5	242747	2.69396e+06	634613
0.756_945.5554		C56 H76 N5 O6 P	945.555	0.756						level5					747251	747251	747251	747251	747251	747251	747251	747251	747251	747251	747251	171627	695902	1.2645e+06	1.21706e+06	1.21153e+06	877754	660445	266594	685001	197345	5.0587e+06	1.5379e+06	524930	1.56279e+06	702885
0.757_199.0841	2-acetyl-6-hydroxy-7-(hydroxymethyl)-1,5,6,7-tetrahydro-4h-azepin-4-one	C9 H13 N O4	199.084	0.757		S35013865	HMDB0035177			level4	Organoheterocyclic compounds	Azepines	null		698432	914694	708883	727763	822811	879015	760681	765849	884777	757300	707301	3.11827e+06	1.03961e+06	4.50221e+06	3.10247e+06	5.84448e+06	955999	287354	306624	688748	363736	2.33315e+06	2.57522e+06	1.87455e+06	278368	2.29438e+06
0.757_411.1462		C18 H25 N3 O6 S	411.146	0.757						level5					127299	143945	204655	153968	133890	147845	143817	147233	154967	129995	172142	20173.1	543125	20717.4	187582	27175.6	157566	1.38094e+06	946996	91037.4	510079	27060.5	25252.1	20587.7	130555	221830
0.758_164.0834	Eugenol	C10 H12 O2	164.083	0.758	C10453	S13876103	HMDB0005809			level4	Benzenoids	Phenols	Methoxyphenols		1.10661e+06	988999	876327	1.05972e+06	936473	1.01355e+06	905651	1.06981e+06	851681	1.10795e+06	1.00341e+06	29987.5	2.29367e+06	164204	27659.9	28974.9	1.07656e+06	3.77742e+06	6.43026e+06	669397	4.28716e+06	32384.8	195225	170094	2.46585e+06	1.45555e+06
0.758_280.1303	Phaseic acid	C15 H20 O5	280.13	0.758	C09707	S4444860				level4	Terpenoids	Sesquiterpenoids (C15)	Others		1.13329e+06	1.11252e+06	1.09058e+06	1.16096e+06	1.24836e+06	883728	1.13743e+06	1.07306e+06	1.20659e+06	1.17394e+06	1.07709e+06	727886	1.10692e+06	501761	918531	927482	1.32534e+06	649600	1.96169e+06	1.32361e+06	1.97801e+06	544924	1.20951e+06	640907	1.09874e+06	1.48202e+06
0.76_245.1044	N-phenylacetyl pyroglutamic acid	C14 H15 N O3	245.104	0.76		S30778480	HMDB0059782			level4	Benzenoids	Benzene and substituted derivatives	Phenylacetamides		1.39916e+07	1.38638e+07	1.35387e+07	1.39844e+07	1.46549e+07	1.38781e+07	1.38756e+07	1.40167e+07	1.38271e+07	1.45026e+07	1.36401e+07	20051.6	5.54029e+07	6.5047e+06	24469.7	26711.9	8.5796e+06	3.66954e+07	2.3933e+07	7.80238e+06	2.70606e+07	313407	68336.1	1.30765e+06	2.95472e+07	1.16873e+07
0.76_382.108		C18 H22 O7 S	382.108	0.76						level5					438781	502027	518832	526828	451097	467713	470886	477290	505525	495858	466601	834017	611210	504875	301240	1.27983e+06	695490	69750.3	740048	545982	1.08627e+06	45490.9	84335.4	457521	87513.7	591914
0.76_921.5534			921.553	0.76						level5					586455	579548	627700	603200	480920	511807	611218	492299	662163	567156	559315	124329	584063	1.07356e+06	476122	1.04358e+06	1.00528e+06	281093	145598	519755	124279	2.77356e+06	1.09712e+06	286766	1.26922e+06	547441
0.761_366.2399	Tetrahydrocortisol	C21 H34 O5	366.24	0.761	C05472	S5655	HMDB0000949			level4	ST Sterol Lipids	ST02 Steroids	ST0203 C21 steroids (gluco/mineralocorticoids, progestogens) and derivatives	map00140 Steroid hormone biosynthesis;	2.39909e+07	2.66862e+07	2.44732e+07	2.28174e+07	2.40657e+07	2.45299e+07	2.44949e+07	2.44182e+07	2.39802e+07	2.49243e+07	2.43408e+07	2.61082e+07	3.83504e+07	3.85971e+07	2.42842e+07	4.99312e+07	1.97557e+07	2.02524e+07	1.36794e+07	1.60474e+07	1.86503e+07	2.83175e+07	3.99565e+07	3.11691e+07	2.71383e+07	3.76403e+07
0.762_422.2295	Picrasin c	C23 H34 O7	422.229	0.762	C08776	S158422				level4	Terpenoids	Triterpenoids (C30)	Dammarenes	NULL	2.02151e+06	2.02151e+06	2.02151e+06	2.02151e+06	2.02151e+06	2.02151e+06	2.02151e+06	2.02151e+06	2.02151e+06	2.02151e+06	2.02151e+06	3.39526e+06	1.71534e+06	847497	832584	841034	668079	2.48675e+06	1.22215e+06	608381	1.02015e+06	6.94606e+06	6.93162e+06	3.41803e+06	1.71684e+06	5.99693e+06
0.762_439.2195	249cza0134	C22 H33 N O8	439.219	0.762	C10357	S30791157				level4	Alkaloids	Alkaloids derived from ornithine	Pyrrolizidine alkaloids	NULL	859287	843623	852110	843700	878910	852330	850381	842265	885823	878734	816768	1.69281e+06	473721	339241	526527	540162	116171	680408	122367	138822	146812	2.60023e+06	2.43512e+06	3.0953e+06	675614	3.07724e+06
0.762_457.2091	O-demethylpuromycin	C21 H27 N7 O5	457.209	0.762	C02864	S388879				level4				NULL	993414	993414	993414	993414	993414	993414	993414	993414	993414	993414	993414	926047	1.02067e+06	918849	1.17444e+06	1.62179e+06	1.55538e+06	653295	1.16596e+06	1.11357e+06	1.08053e+06	897848	1.67043e+06	901336	1.269e+06	1.23103e+06
0.762_460.2085	Tu4153400	C25 H32 O8	460.209	0.762		S571099				level4					1.90653e+08	1.90653e+08	1.90653e+08	1.90653e+08	1.90653e+08	1.90653e+08	1.90653e+08	1.90653e+08	1.90653e+08	1.90653e+08	1.90653e+08	1.54237e+08	1.92682e+08	1.5403e+08	2.5909e+08	2.74928e+08	3.14875e+08	1.55668e+08	2.4478e+08	2.66693e+08	2.25501e+08	1.99818e+08	1.78996e+08	1.60565e+08	2.54043e+08	2.90595e+08
0.763_234.0191	4-ethyl-2,6-dihydroxyphenyl hydrogen sulfate	C8 H10 O6 S	234.019	0.763		S74852096	HMDB0128030			level4	Organic acids and derivatives	Organic sulfuric acids and derivatives	Arylsulfates		267675	301754	260910	279753	279540	285959	293964	268685	269256	288127	278605	47818.1	381742	46247.4	46577.5	107348	1.64087e+06	23799.6	1.28655e+06	1.70685e+06	1.65274e+06	11911.7	14557.6	43735.3	28665.3	92212.7
0.764_306.1248	(1ar,2r,3s,11cs)-6,11-dimethyl-1a,2,3,11c-tetrahydrotetrapheno[1,2-b]oxirene-2,3-diol	C20 H18 O3	306.125	0.764	C19559	S152268	HMDB0062223			level4	Benzenoids	Phenanthrenes and derivatives	Phenanthrols	map00980 Metabolism of xenobiotics by cytochrome P450; map05204 Chemical carcinogenesis;	1.33664e+07	1.32016e+07	1.33552e+07	1.36052e+07	1.33216e+07	1.33364e+07	1.33271e+07	1.32661e+07	1.37156e+07	1.33945e+07	1.31108e+07	53767.9	1.13718e+07	457280	65522.6	70738.1	1.21717e+07	5.06334e+07	8.28203e+07	1.07811e+07	4.60145e+07	62111.9	57946.1	899494	4.8262e+07	1.61871e+07
0.765_212.1045	Guaietolin	C11 H16 O4	212.105	0.765		S62058				level4					788171	821014	911770	746217	853372	803443	826769	815409	867277	852490	755325	1.15295e+06	468526	1.99994e+06	1.62517e+06	3.41226e+06	423152	505506	230510	376531	233118	1.26448e+06	3.10525e+06	1.18588e+06	453875	850589
0.765_901.5844		C55 H86 N O3 P3	901.584	0.765						level5					648058	570171	708558	714067	615672	634564	644356	583013	628350	764346	616462	196765	822429	1.12478e+06	391645	2.06599e+06	1.21046e+06	400339	243030	743295	288261	4.92228e+06	1.97624e+06	298532	2.32606e+06	482575
0.766_231.0889	Benzoyldehydro-2,3-dihydroxy-benzone	C13 H13 N O3	231.089	0.766		S389842				level4					6.35014e+06	7.05148e+06	6.37243e+06	6.95072e+06	6.96234e+06	6.44661e+06	6.40579e+06	6.72199e+06	7.06267e+06	6.46923e+06	6.70025e+06	21265.1	2.67879e+07	3.78989e+06	24309.2	24169.6	4.09256e+06	1.61002e+07	1.211e+07	3.81249e+06	1.35445e+07	207117	53750.9	618382	1.2274e+07	5.10237e+06
0.766_279.0887	Graveoline	C17 H13 N O3	279.089	0.766	C10689	S314099	HMDB0033480			level4	Organoheterocyclic compounds	Quinolines and derivatives	Quinolones and derivatives	NULL	5.78608e+06	5.78769e+06	5.71893e+06	5.83375e+06	5.76466e+06	5.77782e+06	5.77795e+06	5.77905e+06	5.74306e+06	5.84386e+06	5.74685e+06	19834.3	2.61272e+07	3.30824e+06	24830.4	26384.8	4.17604e+06	1.58088e+07	9.5485e+06	3.52895e+06	1.11402e+07	165661	36005	691946	1.35834e+07	5.09442e+06
0.766_430.2558		C16 H39 N4 O7 P	430.256	0.766						level5					157626	113478	122471	164353	132041	143387	113470	146204	127090	125325	160106	314536	85529.4	47719.8	73104	51309.5	84289.6	65166.3	124775	156596	83902.1	475344	319828	806092	66139.2	395251
0.766_449.1808			449.181	0.766						level5					6.23126e+06	1.71488e+06	6.20959e+06	5.90664e+06	5.98537e+06	3.93646e+06	3.87251e+06	4.94972e+06	4.91645e+06	4.56035e+06	4.44232e+06	5.23032e+06	2.8134e+06	1.22466e+06	1.62833e+06	1.70587e+06	4.05169e+06	3.73811e+06	5.29521e+06	5.11822e+06	3.29072e+06	3.83276e+06	3.61934e+06	1.9469e+06	5.00545e+06	1.17393e+06
0.766_477.1985		C22 H32 N5 O3 P S	477.199	0.766						level5					1.9633e+06	2.08475e+06	1.99508e+06	2.04787e+06	2.14929e+06	1.93558e+06	2.09877e+06	1.99944e+06	2.08814e+06	2.10488e+06	1.94626e+06	2.25206e+06	1.29667e+06	3.45898e+06	3.98143e+06	5.93759e+06	1.23604e+06	1.38894e+06	1.0884e+06	1.19165e+06	708565	3.69214e+06	2.15303e+06	2.50244e+06	1.14211e+06	3.27541e+06
0.766_845.5302			845.53	0.766						level5					791431	791431	791431	791431	791431	791431	791431	791431	791431	791431	791431	351399	1.0678e+06	643673	504765	602655	3.20941e+06	496499	3.18959e+06	3.12284e+06	3.61985e+06	726123	464057	572872	697846	584029
0.766_899.5688			899.569	0.766						level5					685053	732274	694783	643773	732782	691182	682882	642024	771026	710814	667787	146458	860356	1.40624e+06	413672	2.06036e+06	1.39113e+06	374658	251987	931969	194417	3.1666e+06	1.48248e+06	291848	2.23628e+06	553273
0.767_897.5538		C38 H85 N5 O14 P2	897.554	0.767						level5					556427	542043	507152	585537	538117	559743	515279	524925	591680	538589	538620	128154	684377	862487	344237	1.20956e+06	970018	229342	100218	585232	143523	2.65885e+06	1.17296e+06	246851	1.45035e+06	500774
0.768_113.9928	Trifluoroacetic acid	C2 H F3 O2	113.993	0.768		S10239201	HMDB0014118			level4	Organic acids and derivatives	Carboxylic acids and derivatives	Alpha-halocarboxylic acids and derivatives		9.87182e+06	1.02659e+07	9.47587e+06	1.05368e+07	1.12907e+07	9.54303e+06	9.98436e+06	1.11582e+07	9.78285e+06	9.90301e+06	1.0256e+07	1.44103e+07	9.56292e+06	9.13781e+06	9.67349e+06	1.53617e+07	7.3239e+06	9.55066e+06	7.24256e+06	8.61855e+06	5.62005e+06	1.12191e+07	1.5744e+07	9.85415e+06	1.11834e+07	1.23123e+07
0.769_162.0678	Safrole	C10 H10 O2	162.068	0.769	C10490	S13848731	HMDB0033591			level4	Organoheterocyclic compounds	Benzodioxoles	null	NULL	3.44503e+07	3.43268e+07	3.26356e+07	3.54249e+07	3.74626e+07	3.33831e+07	3.37157e+07	3.52443e+07	3.57859e+07	3.43521e+07	3.39053e+07	34183.8	2.5552e+07	1.09505e+07	30357.1	116919	2.71385e+07	1.0364e+08	9.87768e+07	2.3781e+07	5.71852e+07	54178.6	111078	8.71351e+06	7.57288e+07	1.81232e+07
0.769_877.5854		C55 H80 N3 O4 P	877.585	0.769						level5					698200	675440	639913	663102	649211	636270	689147	593847	710515	655773	684729	184550	967369	1.455e+06	307103	2.0577e+06	1.10553e+06	403792	291449	913771	410628	5.24594e+06	2.69586e+06	298766	2.7522e+06	494198
0.77_218.0242	4-(2-hydroxyethyl)phenyl hydrogen sulfate	C8 H10 O5 S	218.024	0.77		S30777652	HMDB0041785			level4	Organic acids and derivatives	Organic sulfuric acids and derivatives	Arylsulfates		814134	788885	846787	854634	877194	781253	814725	864643	800866	796672	874159	444518	1.08004e+06	280928	267715	493032	3.46846e+06	212684	3.38795e+06	2.77354e+06	4.16634e+06	218549	223967	195088	216336	418308
0.772_335.1515		C21 H21 N O3	335.151	0.772						level5					484387	530294	551467	477127	527855	596269	493013	550628	533563	503576	494474	61457.3	903075	87842.9	55078.6	76903.5	295282	3.69327e+06	709472	161773	351009	65598.5	58262.7	61664.9	792824	477574
0.772_436.2086	Polhovolide	C23 H32 O8	436.209	0.772	C09532	S390763				level4	Terpenoids	Sesquiterpenoids (C15)	Guaianolide	NULL	131849	90838	108479	85365.7	161330	117858	107637	104860	105603	107732	131026	162572	57683	42724.9	44115.6	49137.5	76177.3	59314.2	81698.3	96009.2	83832.4	592880	805060	749918	80783.3	514236
0.772_873.5544		C56 H75 N O7	873.554	0.772						level5					2.74412e+06	2.56769e+06	2.77324e+06	2.386e+06	2.44274e+06	2.48874e+06	2.71873e+06	2.32825e+06	2.66683e+06	2.70125e+06	2.56653e+06	579394	3.14906e+06	4.91253e+06	1.5967e+06	7.05083e+06	4.81966e+06	1.43976e+06	1.23412e+06	3.50913e+06	1.55481e+06	1.78014e+07	7.02002e+06	1.29886e+06	9.07337e+06	1.77629e+06
0.772_874.5573			874.557	0.772						level5					1.13418e+06	1.06878e+06	1.1747e+06	1.03937e+06	1.11707e+06	1.09912e+06	1.11693e+06	1.08757e+06	1.14412e+06	1.10914e+06	1.08131e+06	278617	1.20251e+06	2.33525e+06	712456	3.12903e+06	1.91787e+06	707383	485146	1.53427e+06	548378	7.94598e+06	2.76428e+06	550912	3.71354e+06	953487
0.773_361.1156	(2e)-n-[2-(dihydroxymethyl)-4-hydroxy-5-methoxyphenyl]-3-(4-hydroxy-3-methoxyphenyl)acrylamide	C18 H19 N O7	361.116	0.773		S30776766	HMDB0029297			level4	Phenylpropanoids and polyketides	Cinnamic acids and derivatives	Hydroxycinnamic acids and derivatives		1.11304e+06	1.06382e+06	1.16459e+06	1.15715e+06	1.08795e+06	1.11028e+06	1.11397e+06	1.11181e+06	1.1399e+06	1.09916e+06	1.11408e+06	3.02016e+06	812652	1.46249e+06	935483	1.60646e+06	198619	2.28648e+06	1.27015e+06	351524	491029	54160.8	48788.5	440310	1.45401e+06	574561
0.773_371.1513	Trazodone	C19 H22 Cl N5 O	371.151	0.773	C07156	S5332	HMDB0014794			level4	Organoheterocyclic compounds	Diazinanes	Piperazines	NULL	1.71044e+06	1.7633e+06	1.80409e+06	1.67324e+06	1.76791e+06	1.73711e+06	1.74268e+06	1.74036e+06	1.74562e+06	1.76697e+06	1.71888e+06	1.13752e+06	3.3044e+06	827698	1.91653e+06	2.20181e+06	2.55005e+06	7.69842e+06	3.55308e+06	2.45978e+06	2.41547e+06	1.41785e+06	931492	832924	1.21701e+06	2.01563e+06
0.774_220.0035		C7 H8 O6 S	220.004	0.774						level5					1.20656e+06	1.42918e+06	1.21723e+06	1.19873e+06	1.51497e+06	1.24699e+06	1.29875e+06	1.57454e+06	1.26847e+06	1.22066e+06	1.21919e+06	288785	2.35714e+06	367485	80247.8	1.11292e+06	4.40067e+06	145094	5.95064e+06	4.33104e+06	1.22131e+07	28717.5	165995	176502	52476.2	614294
0.774_453.1982		C26 H33 N O2 P2	453.198	0.774						level5					53366.9	68608.8	59573.2	64558.4	54532.2	54276.9	57833.3	53935.9	56956.6	79248.3	51684.5	99085.3	33179.7	19384.9	25038.9	26855.5	37515.2	28289.7	54976.1	51276.3	49425.1	228444	437941	425940	40361.3	315159
0.775_247.0991		C17 H13 N O	247.099	0.775						level5					173979	173979	173979	173979	173979	173979	173979	173979	173979	173979	173979	10563.8	516129	9478.35	16521.6	19894.1	233212	240157	628303	196622	433939	16125	16617.2	9787.79	289828	187715
0.775_379.1412	Angoline	C22 H21 N O5	379.141	0.775	C09336	S164274				level4				NULL	2.49626e+06	2.35675e+06	2.46234e+06	2.11334e+06	2.24535e+06	2.77669e+06	2.30303e+06	2.22349e+06	2.48267e+06	2.40621e+06	2.31627e+06	19328.1	4.49415e+06	368922	17249.8	16121.2	1.81964e+06	1.60569e+07	3.11472e+06	1.44373e+06	2.07974e+06	20581.6	18686.4	112648	2.40754e+06	1.53533e+06
0.775_432.1775	Salvinorin a	C23 H28 O8	432.178	0.775	C20196	S113947				level4	Terpenoids	Diterpenoids (C20)	Clerodanes	NULL	9.33833e+07	8.54164e+07	9.37914e+07	9.45929e+07	9.36205e+07	8.30295e+07	9.39463e+07	8.44667e+07	9.83655e+07	9.17552e+07	9.05518e+07	8.68305e+07	6.63957e+07	5.84805e+07	1.17004e+08	1.39142e+08	1.36904e+08	7.13671e+07	9.28766e+07	1.22841e+08	9.86511e+07	1.01721e+08	7.59648e+07	6.13032e+07	6.13682e+07	8.36989e+07
0.775_514.2373	Telmisartan	C33 H30 N4 O2	514.237	0.775	C07710	S59391	HMDB0015101			level4	Benzenoids	Benzene and substituted derivatives	Biphenyls and derivatives	NULL	727342	719860	732959	748655	708890	727988	728687	733913	700156	742251	733804	26342.6	2.79943e+06	523790	24836.2	22810.5	347673	1.48105e+06	1.0139e+06	369395	1.29282e+06	29769.2	28645.3	74483.6	1.6817e+06	631274
0.775_849.555		C41 H80 N5 O11 P	849.555	0.775						level5					747516	775186	776122	726070	765883	741945	773060	741065	763181	799157	722293	189249	1.00446e+06	1.92096e+06	402516	2.27296e+06	1.55337e+06	408549	448833	1.26057e+06	376344	5.13574e+06	1.73211e+06	385506	2.15856e+06	658707
0.776_371.2453		C23 H33 N O3	371.245	0.776						level5					240694	308107	288121	233127	312162	269619	289508	268685	293438	279571	249989	20771.3	274916	156858	19809.5	19067.4	624735	1.23177e+06	104185	645660	133631	21873.8	23968.2	39401.6	527766	31856.9
0.776_422.1489	Izonsteride	C24 H26 N2 O S2	422.149	0.776		S151061				level4					1.60866e+06	1.76084e+06	1.79566e+06	1.71183e+06	1.84563e+06	1.47786e+06	1.72588e+06	1.74673e+06	1.86648e+06	1.77318e+06	1.55367e+06	1.30614e+06	823639	753611	2.25265e+06	2.08996e+06	1.77538e+06	1.18572e+06	1.60174e+06	1.87809e+06	1.27417e+06	1.42923e+06	1.30795e+06	855442	904698	1.35146e+06
0.776_433.1809	Brexpiprazole	C25 H27 N3 O2 S	433.181	0.776		S10152155				level4					1.99081e+07	2.13988e+07	2.02735e+07	2.04295e+07	2.23987e+07	1.76314e+07	2.11969e+07	2.05605e+07	2.17593e+07	2.05522e+07	1.97956e+07	1.88843e+07	1.27884e+07	1.35624e+07	2.55702e+07	3.17438e+07	3.24306e+07	1.61325e+07	2.06396e+07	2.67696e+07	2.22785e+07	2.25807e+07	1.61409e+07	1.24298e+07	1.31812e+07	2.00031e+07
0.776_468.0283		C22 H10 N6 O3 P2	468.028	0.776						level5					41091.1	44735.9	40104.1	44648.3	40972.3	40633.5	47851.5	42161.5	38961.3	48482.9	38280.8	1268.77	30134.7	977.547	1214.02	1246.53	54811.2	2251.56	600267	69138.6	277671	1488.98	1135.11	1510.74	1735.68	10157.8
0.776_585.3871		C35 H55 N O4 S	585.387	0.776						level5					689031	689031	689031	689031	689031	689031	689031	689031	689031	689031	689031	745400	452290	994372	1.44056e+06	991109	418788	582314	349874	696807	253630	784620	778915	959186	620155	1.48638e+06
0.777_823.5447			823.545	0.777						level5					1.07424e+06	977906	1.01909e+06	981082	1.02616e+06	1.01113e+06	1.02655e+06	998382	1.03043e+06	1.04653e+06	985184	867290	1.69812e+06	1.31689e+06	866469	1.63772e+06	2.93565e+06	903204	2.68826e+06	2.63739e+06	3.31938e+06	1.21132e+06	778439	930898	1.32165e+06	1.00303e+06
0.778_242.0938	(±)-equol	C15 H14 O3	242.094	0.778		S339332	HMDB0130495			level4	Phenylpropanoids and polyketides	Isoflavonoids	Isoflavans		850360	892090	805145	861813	912779	860016	870235	870308	853054	857070	867647	2.4435e+06	861154	1.17869e+06	1.308e+06	2.95298e+06	571029	100007	325791	422200	353386	22404	249372	573352	212319	648418
0.778_330.1098	Acetylshikonin	C18 H18 O6	330.11	0.778	C17413	S30089				level4				NULL	167904	141910	176968	170517	177037	147582	144375	177789	176228	183969	137760	14297.4	168523	14020.6	15171.4	17901.8	113713	490886	195792	148306	173587	18394.8	21286.1	17824.9	708905	52044
0.778_345.2297		C21 H31 N O3	345.23	0.778						level5					857561	721977	824587	774831	737659	796467	792987	814005	742057	848647	741134	18019.2	1.84493e+06	422736	18759.6	21996.4	986056	1.81926e+06	585451	810169	883462	22793.6	25497.2	283176	1.71778e+06	326552
0.779_396.2141	6737	C25 H32 O2 S	396.214	0.779		S4940229				level4					1.8197e+06	2.13215e+06	2.0636e+06	2.1246e+06	2.08395e+06	1.86679e+06	2.0118e+06	1.9827e+06	2.01842e+06	2.05956e+06	2.04633e+06	2.8962e+06	2.59045e+06	3.81266e+06	2.79934e+06	3.09773e+06	1.20867e+06	1.53076e+06	646306	932909	874404	4.05976e+06	5.22093e+06	4.61116e+06	1.56468e+06	4.09276e+06
0.779_417.1566		C21 H29 N3 P2 S	417.157	0.779						level5					322576	355671	315604	331912	354276	296621	343968	321959	337820	365435	307517	11934.5	2.08978e+06	63638.7	18409.2	23505.1	596895	4.73724e+06	2.41656e+06	738326	1.6354e+06	21498.5	28654.2	17871.8	378176	373419
0.78_263.0608		C13 H13 N O3 S	263.061	0.78						level5					2.15926e+06	2.08815e+06	2.38923e+06	2.07662e+06	2.13838e+06	2.111e+06	2.14353e+06	2.07071e+06	2.4375e+06	2.13207e+06	2.0509e+06	16178.6	8.14914e+06	1.29702e+06	17641	20851.8	1.70613e+06	5.66729e+06	3.98708e+06	1.647e+06	4.88236e+06	59053.6	24039.1	167667	4.50243e+06	1.52062e+06
0.78_448.1406		C20 H24 N4 O6 S	448.141	0.78						level5					927365	891327	1.04485e+06	971535	983039	850816	976482	923526	1.03342e+06	940934	919967	1.33495e+06	1.09088e+06	1.29895e+06	1.07556e+06	1.57846e+06	954648	767312	685153	737014	704109	1.00803e+06	1.57054e+06	1.16256e+06	623901	1.58157e+06
0.78_455.2507		C23 H37 N O8	455.251	0.78						level5					136629	170657	137557	133264	148081	133833	166943	141942	138325	139498	150138	400772	80067.7	788902	650771	1.6435e+06	99947.9	76110.5	47401.8	43708.2	42550.3	282876	851962	150854	66265.9	144618
0.78_522.3903		C31 H54 O6	522.39	0.78						level5					1.85983e+06	1.92131e+06	1.86813e+06	1.85677e+06	1.90056e+06	1.8753e+06	1.87953e+06	1.88059e+06	1.89208e+06	1.89278e+06	1.85955e+06	1.72246e+06	2.36823e+06	2.36248e+06	2.8245e+06	2.66642e+06	3.19765e+06	1.7127e+06	1.75113e+06	2.39177e+06	2.13465e+06	2.26203e+06	2.22689e+06	2.56226e+06	2.08971e+06	3.37084e+06
0.781_163.9009	Molybdic(vi) acid	H2 Mo O4	163.901	0.781		S74188				level4					96867	91713.8	98360.5	100904	96834.1	97208.9	98243.7	92687.7	101826	96321	95584.9	3404.02	118321	4159.89	3316.94	3810.07	347962	5520.43	675993	467794	561330	4053.2	4348.83	4928.28	4461.8	29254.5
0.781_166.0628	3-(2-hydroxyphenyl)propanoate	C9 H10 O3	166.063	0.781	C01198	BGI78	HMDB0033752	3.2		level3	Phenylpropanoids and polyketides	Phenylpropanoic acids	null	map00360 Phenylalanine metabolism; map01100 Metabolic pathways;	510802	407351	488645	548358	446787	433646	468939	451319	571780	492593	407712	1.62888e+06	1.02045e+06	1.97242e+06	1.30139e+06	1.27136e+06	1.32736e+06	752329	537361	1.37526e+06	804966	1.16466e+06	1.70951e+06	1.34657e+06	774302	1.32441e+06
0.781_266.1144	(2z)-3-(3,4,5-trimethoxyphenyl)-2-propen-1-yl acetate	C14 H18 O5	266.114	0.781		S30777517	HMDB0040891			level4	Benzenoids	Phenol ethers	Anisoles		1.02451e+06	1.141e+06	556351	1.06961e+06	699203	1.10684e+06	610597	696213	1.23496e+06	931529	830953	347515	1.38812e+06	291708	165022	807313	2.33297e+06	341298	1.95779e+06	1.71309e+06	1.90238e+06	542136	692571	329062	1.22324e+06	989966
0.781_298.1198	Benzyl succinate	C18 H18 O4	298.12	0.781	C07332	S7370				level4				NULL	4.03165e+06	3.54681e+06	3.74075e+06	3.85623e+06	4.07548e+06	3.65373e+06	3.76754e+06	3.94994e+06	3.88175e+06	3.67641e+06	3.87245e+06	3.53561e+06	4.31907e+06	2.0987e+06	976734	1.92404e+06	2.56644e+06	1.36791e+07	7.09462e+06	2.2224e+06	5.74517e+06	46501.5	54818	687415	8.5827e+06	1.55816e+06
0.782_197.0177		C5 H11 N O3 S2	197.018	0.782						level5					5.0015e+06	5.06386e+06	4.85427e+06	4.80897e+06	5.01683e+06	4.56274e+06	4.9812e+06	5.19913e+06	4.94422e+06	4.64076e+06	5.0042e+06	5.99499e+06	2.9766e+06	6.34556e+06	1.09042e+07	5.01456e+06	3.88843e+06	2.65446e+06	2.97933e+06	3.8812e+06	3.11929e+06	4.37502e+06	5.54529e+06	1.01554e+07	3.48329e+06	4.88997e+06
0.782_268.1204	2ee5599gqs	C16 H16 N2 O2	268.12	0.782	C19217	S11448				level4				NULL	1.24434e+06	1.2825e+06	1.20675e+06	1.19585e+06	1.37021e+06	1.22752e+06	1.25586e+06	1.16058e+06	1.34622e+06	1.23648e+06	1.26955e+06	1.95575e+06	1.49694e+06	1.5215e+06	2.04603e+06	1.51189e+06	1.24604e+06	1.00534e+06	1.04108e+06	1.0383e+06	1.13769e+06	542752	1.03183e+06	1.13494e+06	1.42855e+06	1.45945e+06
0.782_321.1359	Pyriproxyfen	C20 H19 N O3	321.136	0.782	C18605	S82851				level4				NULL	500420	478550	514047	507478	526049	504640	523133	466550	479579	551455	508043	75850.9	766400	93438.4	195345	55267.2	549238	2.92414e+06	1.08934e+06	373600	638939	50835	62672.7	44958.9	726898	279082
0.782_415.2199		C16 H39 N3 O3 P2 S	415.22	0.782						level5					409983	342798	282221	545675	257797	328354	331428	356288	426371	404778	270525	586483	756508	398396	248244	354493	329821	134028	312199	198430	440610	1.45215e+06	700458	3.00603e+06	72839.7	2.2107e+06
0.783_462.2086	Patrinoside	C21 H34 O11	462.209	0.783	C11640	S142388				level4				NULL	913391	613411	780686	882596	806351	774915	862182	775494	868425	752242	750511	1.34695e+06	334098	2.391e+06	1.22161e+06	2.66813e+06	33300.1	635268	43577.6	40313.7	39278	1.58803e+06	2.27395e+06	828489	445380	585417
0.783_479.199		C20 H33 N O12	479.199	0.783						level5					892124	968722	875392	790418	700067	892595	846540	914068	937491	797272	779141	1.46866e+06	234351	2.38009e+06	1.15416e+06	2.83698e+06	208441	585918	72806.8	241668	53298.1	1.18586e+06	1.48095e+06	1.03948e+06	408516	988315
0.784_357.2509		C19 H35 N O5	357.251	0.784						level5					1.13105e+06	1.19867e+06	1.1367e+06	1.21941e+06	1.29539e+06	1.07728e+06	1.16168e+06	1.23579e+06	1.07525e+06	1.28139e+06	1.17352e+06	1.14981e+06	897428	1.06137e+06	828816	1.19419e+06	603601	943038	437269	840507	695976	1.32689e+06	3.64791e+06	1.46326e+06	999303	1.38265e+06
0.784_413.1254		C25 H19 N O5	413.125	0.784						level5					317629	318630	331117	301285	326568	318938	318991	317713	316413	328427	313092	17776.2	967646	51861.3	13273.3	14328.5	92405.9	1.71207e+06	231937	69654.7	251309	13120	22570.6	13890.4	402173	225328
0.786_159.0682	Indole-3-acetaldehyde	C10 H9 N O	159.068	0.786	C00637	S778	HMDB0001190			level4	Organoheterocyclic compounds	Indoles and derivatives	Indoles	map00380 Tryptophan metabolism; map01100 Metabolic pathways;	3.47676e+06	3.93346e+06	3.26898e+06	4.0281e+06	3.9894e+06	3.66278e+06	4.19546e+06	3.28287e+06	3.65767e+06	3.93248e+06	3.76388e+06	8.05506e+06	2.70819e+06	7.74478e+06	8.63794e+06	7.99547e+06	2.4192e+06	3.3829e+06	1.61098e+06	2.22201e+06	1.01113e+06	4.43027e+06	7.85673e+06	4.24601e+06	3.37079e+06	3.77422e+06
0.786_201.0189		C8 H8 Cl N O3	201.019	0.786						level5					570124	670287	625910	671354	586716	609198	656482	656394	603171	581783	645299	466295	865276	992499	477915	919627	1.36725e+06	625920	843966	1.18382e+06	1.13706e+06	1.09492e+06	1.00296e+06	693385	1.11091e+06	550341
0.787_357.2298	Oxybutynin	C22 H31 N O3	357.23	0.787	C07360	S4473	HMDB0015195			level4	Benzenoids	Benzene and substituted derivatives	null	NULL	173386	173386	173386	173386	173386	173386	173386	173386	173386	173386	173386	13968.4	157436	82186.5	19830.2	23100.1	528903	950922	126479	414125	102563	19444.3	30223	40259.7	441337	20312.5
0.789_254.0936	Ketoprofen	C16 H14 O3	254.094	0.789	C01716	S3693	HMDB0015144			level4	Benzenoids	Benzene and substituted derivatives	Benzophenones	NULL	3.22383e+06	3.1334e+06	3.25111e+06	3.22322e+06	3.26681e+06	3.20578e+06	3.23976e+06	3.09812e+06	3.17818e+06	3.34481e+06	3.21803e+06	31890.5	4.20544e+06	313859	44461.6	50632.8	5.50948e+06	1.27034e+07	8.14991e+06	4.84561e+06	5.66909e+06	40537.6	67271.1	269594	6.48061e+06	1.83886e+06
0.789_318.0997		C19 H14 N2 O3	318.1	0.789						level5					2.9054e+06	2.64875e+06	2.78065e+06	2.92425e+06	2.84878e+06	2.74955e+06	2.77743e+06	2.80056e+06	2.78274e+06	2.94771e+06	2.74436e+06	23880.7	1.49829e+07	2.233e+06	20978	23884	1.72952e+06	6.10636e+06	3.2621e+06	1.75306e+06	6.20555e+06	91693.7	31604.5	213623	9.44586e+06	2.35893e+06
0.789_455.2144		C20 H36 N5 O P3	455.214	0.789						level5					434424	504157	407744	508929	495524	220575	470993	481642	392653	500680	442385	900668	178188	271476	139318	253412	61517.5	66248.2	166646	59956.2	104899	1.37458e+06	1.73797e+06	1.83295e+06	51985	1.57895e+06
0.79_266.0936	Benzarone	C17 H14 O3	266.094	0.79	C14474	S224468				level4				NULL	306347	271365	299907	298328	298977	288408	295288	298152	317492	262481	303096	14842.3	316734	24088.4	23721.3	26563.1	273084	1.67248e+06	1.65101e+06	253417	958535	21434.3	28477.6	16545.7	972449	312657
0.79_312.1832	Praziquantel	C19 H24 N2 O2	312.183	0.79	C07367	S4722	HMDB0015191			level4	Organoheterocyclic compounds	Tetrahydroisoquinolines	null	NULL	70181.9	65707.6	77610.5	75432.5	76904.9	55253.9	75185.3	56715.8	91286.2	75272.9	65784.4	301994	20634.4	288035	751713	51960.4	65074.9	17179.9	16228.4	43156.7	18015.9	56473.9	24081.2	24171.2	20992.9	29652.5
0.79_417.2906		C22 H43 N O4 S	417.291	0.79						level5					862797	877534	951552	963102	873695	885512	886788	970500	844434	903793	911126	1.04641e+06	1.07512e+06	931898	1.13254e+06	1.57572e+06	1.11709e+06	661585	772446	825310	564953	3.49718e+06	2.48625e+06	1.44389e+06	896825	1.4942e+06
0.79_429.1985	Aganepag	C24 H31 N O4 S	429.199	0.79		S24818409				level4					324339	278769	358699	299589	329539	310684	315466	328008	309822	304127	325946	331926	154157	289514	351806	765663	66948.4	74918.3	52495.6	90630.5	46490.9	922010	707858	972708	51809.2	1.0126e+06
0.791_240.1356		C13 H20 O4	240.136	0.791						level5					1.2436e+06	1.128e+06	1.1839e+06	1.32101e+06	1.34522e+06	1.18522e+06	1.20335e+06	1.23888e+06	1.26087e+06	1.36016e+06	1.11082e+06	1.45137e+06	1.70502e+06	1.91824e+06	1.9192e+06	2.04251e+06	1.91511e+06	1.17337e+06	1.11148e+06	1.5438e+06	1.45541e+06	2.13607e+06	2.19768e+06	1.47973e+06	1.45018e+06	1.95802e+06
0.791_435.2433		C24 H37 N O4 S	435.243	0.791						level5					1.45949e+07	1.32684e+07	1.38863e+07	1.32631e+07	1.35055e+07	1.36589e+07	1.33346e+07	1.42622e+07	1.33058e+07	1.44847e+07	1.31103e+07	1.59935e+07	1.89953e+07	1.80305e+07	1.73622e+07	2.65515e+07	1.39189e+07	1.23516e+07	5.39085e+06	9.7641e+06	7.12742e+06	2.92498e+07	3.62071e+07	1.57505e+07	2.48085e+07	1.5093e+07
0.791_439.2751		C24 H41 N O4 S	439.275	0.791						level5					778149	746718	776427	768915	807007	750052	790404	712226	747814	799456	817074	921070	935655	717334	864840	1.00328e+06	818466	1.01937e+06	497196	699861	626930	2.38985e+06	2.48886e+06	1.0956e+06	1.65073e+06	1.14172e+06
0.792_145.0525	Fg7175000	C9 H7 N O	145.053	0.792	C06338	S5816				level4				NULL	2.01586e+07	2.04037e+07	1.95367e+07	2.04141e+07	2.07533e+07	1.73404e+07	1.94155e+07	2.14374e+07	1.96874e+07	1.69377e+07	2.32477e+07	1.67906e+07	4.342e+07	1.98963e+07	1.8616e+07	1.6212e+07	1.61794e+07	4.23273e+07	2.68134e+07	1.55392e+07	3.24739e+07	1.19144e+07	2.37324e+07	1.72649e+07	3.55516e+07	1.58779e+07
0.792_368.2463			368.246	0.792						level5					716314	834820	670668	783198	743496	749178	744919	733785	760369	799786	700947	474892	1.35778e+06	814193	443737	1.04007e+06	1.09095e+06	1.42651e+06	377283	968638	442964	505308	869286	568215	1.24318e+06	868103
0.792_394.2097		C14 H31 N6 O5 P	394.21	0.792						level5					755145	755145	755145	755145	755145	755145	755145	755145	755145	755145	755145	671246	860498	1.56086e+06	949970	2.23067e+06	832494	1.94742e+06	261491	990557	258384	774006	978969	32126.2	974065	709775
0.792_397.0974		C15 H30 N O P3 S2	397.097	0.792						level5					172931	157148	147654	135841	166507	169193	160833	144835	158879	168015	151353	12724.9	563369	16381.1	14067.1	15120.3	41153.9	898501	120442	40305.6	121226	13055.1	18911.9	11756.2	208702	104452
0.792_518.3229	Cucurbitacin f	C30 H46 O7	518.323	0.792	C08798	S4444697				level4	Terpenoids	Triterpenoids (C30)	Cucurbitanes	NULL	2.64515e+06	2.67027e+06	2.59561e+06	2.4569e+06	2.55222e+06	2.39422e+06	3.54601e+06	2.72818e+06	1.90084e+06	2.84869e+06	2.6909e+06	2.72088e+06	3.31746e+06	5.42869e+06	1.00265e+07	3.61266e+06	3.04653e+06	684408	1.25497e+06	2.56407e+06	1.92123e+06	2.8028e+06	2.82291e+06	2.40267e+06	3.99233e+06	1.93433e+06
0.793_242.1512	5-octyl-2-oxotetrahydro-3-furancarboxylic acid	C13 H22 O4	242.151	0.793		S35013298	HMDB0030987			level4	Organoheterocyclic compounds	Lactones	Gamma butyrolactones		309541	380287	289990	311984	312667	342681	315737	307622	432105	299748	271955	635574	360473	619535	663307	1.10738e+06	186440	84511.7	115347	169102	146820	551837	1.3776e+06	246714	284123	476082
0.793_250.1597	(7s,13as)-7-methyl-5,8,13,13a-tetrahydro-6h-isoquinolino[3,2-a]isoquinolinium	C18 H20 N	250.16	0.793	C05318	S10128153				level4				NULL	2.27451e+06	1.96375e+06	2.03513e+06	2.02155e+06	2.36896e+06	1.97932e+06	2.1106e+06	2.16899e+06	1.97415e+06	2.21052e+06	2.13115e+06	2.27126e+06	2.03329e+06	3.21052e+06	2.66016e+06	3.94449e+06	2.96285e+06	1.67506e+06	1.67154e+06	2.36712e+06	2.06963e+06	2.16642e+06	4.81571e+06	2.39795e+06	2.06594e+06	2.89876e+06
0.793_479.2303		C16 H37 N3 O13	479.23	0.793						level5					819419	816889	811854	796462	830280	811978	807421	833965	818557	797887	815329	951021	616146	846895	1.1168e+06	1.0551e+06	580672	454265	448094	689046	355805	1.04092e+06	1.52263e+06	668007	792974	919880
0.794_284.104	Caffeic acid phenethyl ester	C17 H16 O4	284.104	0.794	C10484	S4445100				level4				NULL	782652	677117	703778	738244	756801	646990	730550	705836	756832	704219	738386	385935	1.05257e+06	262203	156693	268527	664761	2.73352e+06	1.15689e+06	678439	883817	18932.2	38426.3	119917	1.93328e+06	330217
0.795_281.002		C8 H11 N O6 S2	281.002	0.795						level5					697136	736922	823916	699424	732590	668169	737269	739518	705797	764524	723999	357534	860539	506860	359031	254106	3.11788e+06	25105.8	3.62911e+06	3.25794e+06	4.14691e+06	16613.2	51899.6	193645	96507.7	435898
0.796_331.214	Megastachine	C20 H29 N O3	331.214	0.796	C09888	S390920				level4				NULL	1.26816e+06	1.35638e+06	1.21868e+06	1.12771e+06	1.3591e+06	1.24586e+06	1.34025e+06	1.18918e+06	1.23499e+06	1.20796e+06	1.38299e+06	162779	1.31495e+06	710220	103097	48032.4	3.3959e+06	4.8371e+06	670898	3.35831e+06	722530	60525.5	119228	258763	2.274e+06	392928
0.796_343.2142	Piperoleine b	C21 H29 N O3	343.214	0.796		S10192699	HMDB0030340			level4	Organoheterocyclic compounds	Benzodioxoles	null		205142	177243	161451	156770	191211	173646	182697	177652	202657	152020	182139	15466.7	98327.9	91465.1	20216.5	27070.2	618566	900629	82956.8	596930	98513.3	18467.5	36655	17803.7	458594	34163.3
0.796_825.553		C44 H81 N3 O7 P2	825.553	0.796						level5					177266	235820	137565	177772	210281	141226	244332	151311	165577	205288	188721	30421.3	242351	302218	77794.9	534038	303837	93224.7	246185	332213	25628.3	1.54535e+06	559769	91136.9	492910	200746
0.797_379.1214		C25 H17 N O3	379.121	0.797						level5					149783	144394	131457	137502	143545	141773	141873	139753	150313	130784	145422	18132.1	390540	32023.7	34383.9	32060.1	101683	1.42312e+06	202991	84325.4	157897	26856.2	39636.3	21435.4	94616.1	87045
0.798_367.2434	Blonanserin	C23 H30 F N3	367.243	0.798		S111697				level4					5.53136e+06	5.63101e+06	5.38848e+06	5.15647e+06	5.79009e+06	5.49861e+06	5.49736e+06	5.45739e+06	5.50336e+06	5.58156e+06	5.43464e+06	5.3761e+06	8.29299e+06	8.2403e+06	5.29912e+06	1.10567e+07	5.07405e+06	5.27669e+06	3.17917e+06	4.33769e+06	4.31078e+06	6.03089e+06	9.87738e+06	6.60017e+06	7.74867e+06	8.55606e+06
0.799_437.2596		C24 H39 N O4 S	437.26	0.799						level5					1.88721e+06	2.01546e+06	1.69212e+06	1.90175e+06	2.00805e+06	1.46731e+06	1.99992e+06	1.77675e+06	2.04837e+06	1.93463e+06	1.72188e+06	2.31324e+06	1.89583e+06	1.62389e+06	2.65203e+06	3.38896e+06	2.00138e+06	2.05963e+06	830222	1.52807e+06	1.03952e+06	2.70991e+06	6.77893e+06	1.50849e+06	2.85542e+06	2.72561e+06
0.8_152.0471	Vanillin	C8 H8 O3	152.047	0.8	C00755	MReference-2529	HMDB0012308	89.2	89.8	level2	Benzenoids	Phenols	Methoxyphenols	map01100 Metabolic pathways;	1.8845e+06	1.91396e+06	1.86379e+06	1.98347e+06	1.91843e+06	1.82623e+06	1.92721e+06	1.86348e+06	1.83591e+06	1.99996e+06	1.91516e+06	104699	5.50218e+06	2.24398e+06	138070	71299.4	2.16813e+06	7.33741e+06	2.582e+06	1.80838e+06	2.70845e+06	264693	81343.6	784152	4.53008e+06	965480
0.8_385.094		C15 H19 N3 O7 S	385.094	0.8						level5					146832	103213	123714	120779	110353	136733	126522	148365	99154.9	120027	124426	16971.9	942584	48346.8	26093.7	24462.7	75490.9	42343.8	40896.9	69499.6	112010	20397.4	32080.6	16524.2	351888	146622
0.8_396.2505	(5z,9alpha,11alpha,13e,15s)-11-acetoxy-9,15-dihydroxyprosta-5,13-dien-1-oic acid	C22 H36 O6	396.25	0.8		S4446214				level4					2.1102e+06	2.12871e+06	2.12169e+06	2.26309e+06	2.28137e+06	2.06228e+06	2.15493e+06	2.25534e+06	1.97012e+06	2.2275e+06	2.24552e+06	4.8441e+06	2.48047e+06	3.0199e+06	2.22977e+06	3.82679e+06	2.16029e+06	1.90446e+06	2.13708e+06	1.90452e+06	2.32676e+06	2.24285e+06	2.80379e+06	2.6403e+06	1.78337e+06	3.17484e+06
0.801_1029.575			1029.58	0.801						level5					162161	143813	204205	176319	143381	146522	167084	158734	163781	162614	168027	24601.5	871124	35864.9	38365.5	51802.4	65795.9	1.67872e+06	319317	96873.2	337680	29943.4	75798.6	28700.8	419170	172047
0.802_270.1572		C13 H22 N2 O4	270.157	0.802					54.6	level5					1.47329e+07	1.59737e+07	1.42418e+07	1.40214e+07	1.6357e+07	1.47095e+07	1.44951e+07	1.57893e+07	1.36665e+07	1.49236e+07	1.59751e+07	2.56288e+07	1.80856e+07	2.8006e+07	2.22578e+07	2.38602e+07	1.32288e+07	1.73919e+07	8.31711e+06	8.70186e+06	9.31522e+06	2.01602e+07	1.99319e+07	1.88903e+07	2.22743e+07	1.73826e+07
0.802_411.2434		C16 H38 N5 O3 P S	411.243	0.802						level5					8.15479e+07	8.59528e+07	8.50715e+07	8.06479e+07	8.59736e+07	8.01081e+07	8.40839e+07	8.6594e+07	7.90333e+07	8.61271e+07	8.31459e+07	1.05817e+08	1.01728e+08	1.14905e+08	1.10396e+08	1.40175e+08	7.24e+07	7.35137e+07	3.68241e+07	5.50786e+07	4.56374e+07	1.49188e+08	2.01625e+08	9.13279e+07	1.28335e+08	1.00684e+08
0.803_205.0194		C10 H7 N O2 S	205.019	0.803						level5					22923.1	22815.5	22801.8	22020.2	23083	22944.3	20231.6	24533.4	22684	22985.4	22056.7	26245.1	146949	39878.8	43784.6	60098.7	35841.9	27861.8	24123.6	23210.7	25431.2	33977.5	84672.1	31669.8	41207.4	65726.8
0.804_325.1307	(s)-(+)-bulbocapnine	C19 H19 N O4	325.131	0.804	C09367	S11934				level4	Alkaloids	Alkaloids derived from tyrosine	Isoquinoline alkaloids	NULL	995236	934465	898065	958681	966306	922312	971926	956982	901840	1.01195e+06	923052	36764.3	1.31733e+06	75516.5	57790.6	78307.1	4.92881e+06	2.95404e+06	2.71079e+06	4.55218e+06	1.90416e+06	45064.4	115700	43041.9	1.80289e+06	508283
0.804_398.2296		C22 H30 N4 O3	398.23	0.804					60.3	level5					4.33159e+06	5.2717e+06	5.34714e+06	4.03837e+06	3.94871e+06	4.14098e+06	4.88656e+06	3.42904e+06	5.70454e+06	4.59249e+06	4.4892e+06	5.20076e+06	3.93955e+06	5.2171e+06	1.78484e+06	2.45684e+06	2.6503e+06	2.66756e+06	2.92378e+06	2.30602e+06	2.34984e+06	1.05593e+07	6.7195e+06	1.29078e+07	2.49275e+06	7.46142e+06
0.804_415.2753		C22 H41 N O4 S	415.275	0.804						level5					1.80651e+06	1.39975e+06	1.60433e+06	1.56264e+06	1.57112e+06	1.11447e+06	1.64141e+06	1.54018e+06	1.51593e+06	1.57041e+06	1.60149e+06	1.76627e+06	1.68335e+06	1.75625e+06	1.37677e+06	1.75546e+06	1.64518e+06	1.32287e+06	707373	1.217e+06	928714	4.1482e+06	4.87775e+06	2.78518e+06	1.79214e+06	2.18494e+06
0.804_433.2276		C26 H32 N3 O P	433.228	0.804						level5					1.57911e+06	1.57911e+06	1.57911e+06	1.57911e+06	1.57911e+06	1.57911e+06	1.57911e+06	1.57911e+06	1.57911e+06	1.57911e+06	1.57911e+06	1.81421e+06	4.79123e+06	1.90882e+06	1.35773e+06	1.18175e+06	2.49748e+06	546664	677737	2.30028e+06	1.01757e+06	5.31701e+06	1.82417e+06	3.41566e+06	2.80386e+06	1.62758e+06
0.804_482.3233		C28 H42 N4 O3	482.323	0.804						level5					83375.6	42153	34288.1	71116	57563.8	89204.1	43526	64238	43503.1	62073.1	62009.9	16340.3	49030.7	1.75878e+06	466960	99374.7	44540.5	17065.5	16349.2	19871.9	17491.6	268984	54278.5	73500.8	27134.6	39425
0.805_262.1096	Orange ot	C17 H14 N2 O	262.11	0.805	C19287	S13320130				level4				NULL	308438	294848	297492	310432	270807	334412	269936	295308	264613	334935	309090	13998.8	1.04104e+06	135265	22281.4	30359.6	359658	1.3386e+06	423667	302027	404739	17350.7	45546.1	24594.9	437162	209738
0.805_388.1262	Aranidipine	C19 H20 N2 O7	388.126	0.805		S2139				level4					233817	253577	220611	260441	239881	242091	239083	228334	259764	240108	236332	11669	229765	19136.2	23179.3	35744	1.56207e+06	380917	883040	2.00456e+06	353553	17511	63603.5	14895.1	154946	125346
0.805_409.2278		C17 H37 N3 O4 P2	409.228	0.805						level5					4.5327e+06	3.39471e+06	3.83072e+06	4.95333e+06	3.27336e+06	4.60679e+06	3.66583e+06	4.2087e+06	4.01004e+06	3.93834e+06	3.93096e+06	3.96361e+06	2.83203e+06	6.80065e+06	6.04553e+06	1.59848e+07	3.52672e+06	3.32896e+06	3.11277e+06	3.41542e+06	1.74658e+06	4.30337e+06	1.38808e+07	3.72431e+06	3.60237e+06	5.60407e+06
0.806_362.1056		C12 H18 N4 O9	362.106	0.806						level5					256684	241310	191123	209753	237285	227171	216279	235970	261869	189672	232371	187290	160127	139831	199959	153391	284996	137034	522615	416144	276860	41114.7	162189	167820	137082	148005
0.806_379.0959		C11 H17 N5 O10	379.096	0.806						level5					106076	115754	115823	79864.6	97125.2	102672	90015.1	122455	91888.5	120207	88815.9	65987.8	132388	76117.1	87175.8	59176.5	100988	45894.2	304971	224377	127617	40593.2	179103	42109.1	46163.6	141542
0.806_408.2253		C15 H33 N6 O5 P	408.225	0.806						level5					4.89482e+06	4.81665e+06	5.53287e+06	5.02214e+06	5.63553e+06	4.61009e+06	4.88935e+06	5.22373e+06	4.84382e+06	5.63265e+06	4.93484e+06	5.53229e+06	4.33346e+06	5.36531e+06	4.71532e+06	8.8285e+06	4.86593e+06	4.4403e+06	2.37507e+06	4.34157e+06	2.27949e+06	3.68494e+06	8.04837e+06	2.4012e+06	4.50512e+06	5.65095e+06
0.807_203.0579	Indole-3-pyruvic acid	C11 H9 N O3	203.058	0.807	C00331	MReference-448	HMDB0060484		68.2	level1	Organoheterocyclic compounds	Indoles and derivatives	Indolyl carboxylic acids and derivatives	map00380 Tryptophan metabolism; map01100 Metabolic pathways;	1.51546e+06	1.57299e+06	1.48456e+06	1.55729e+06	1.52239e+06	1.53023e+06	1.53058e+06	1.5417e+06	1.49744e+06	1.53785e+06	1.54424e+06	17688.3	6.95454e+06	1.3103e+06	57797.6	35654.9	1.30966e+06	2.45193e+06	2.76711e+06	1.72138e+06	5.42415e+06	45376.7	115930	196806	2.29678e+06	898703
0.807_317.1984	(+/-)-tetrabenazine	C19 H27 N O3	317.198	0.807	C11168	S5796	HMDB0015592			level4	Organoheterocyclic compounds	Tetrahydroisoquinolines	null	NULL	877877	766907	872225	845411	859693	847254	859551	796070	795308	893770	873248	17169.2	660283	411832	57425.4	36059.8	2.58942e+06	4.26771e+06	351058	2.27379e+06	410509	96928.5	80603.6	125801	1.58624e+06	131851
0.808_413.26		C22 H39 N O4 S	413.26	0.808						level5					7.80167e+06	7.80167e+06	7.80167e+06	7.80167e+06	7.80167e+06	7.80167e+06	7.80167e+06	7.80167e+06	7.80167e+06	7.80167e+06	7.80167e+06	8.96657e+06	8.01875e+06	1.00495e+07	7.33982e+06	1.28623e+07	6.85133e+06	7.76433e+06	3.23154e+06	6.5633e+06	4.62846e+06	1.07961e+07	1.43116e+07	9.02956e+06	9.65051e+06	9.21316e+06
0.808_457.2463		C21 H36 Cl N5 O4	457.246	0.808						level5					1.09774e+06	1.09774e+06	1.09774e+06	1.09774e+06	1.09774e+06	1.09774e+06	1.09774e+06	1.09774e+06	1.09774e+06	1.09774e+06	1.09774e+06	1.55706e+06	811974	536930	1.32745e+06	1.75718e+06	968008	680813	883833	1.19532e+06	719966	776898	894008	839366	689275	1.31204e+06
0.809_180.0784	Propylparaben	C10 H12 O3	180.078	0.809	D01422	MReference-2880	HMDB0032574		33.4	level3	Benzenoids	Benzene and substituted derivatives	Benzoic acids and derivatives		987056	1.02149e+06	995219	974394	791214	1.02775e+06	965617	850646	959343	1.04913e+06	960593	111562	1.42537e+06	159063	62744.9	73254.6	553055	675575	2.62534e+06	523971	2.09563e+06	86739.4	373042	72552.2	124084	412965
0.809_391.2751		C20 H41 N O4 S	391.275	0.809						level5					4.77237e+06	4.97587e+06	5.05608e+06	5.06504e+06	4.552e+06	4.79891e+06	4.88101e+06	4.85411e+06	4.51205e+06	5.06028e+06	5.08782e+06	9.75747e+06	1.09652e+07	1.60894e+07	5.63197e+06	1.28363e+07	7.35024e+06	3.61984e+06	4.41139e+06	7.04983e+06	4.94341e+06	1.10313e+07	1.05664e+07	8.92998e+06	1.10186e+07	3.7955e+06
0.81_389.2615		C20 H41 N O2 P2	389.262	0.81						level5					258872	302762	339381	288523	323985	271694	364979	298692	321557	308605	254807	147828	329791	666174	336288	1.0887e+06	264189	207054	32540.8	141065	11404.8	355317	662308	140807	337447	235994
0.81_446.2142		C32 H31 P	446.214	0.81						level5					1.44058e+06	1.44058e+06	1.44058e+06	1.44058e+06	1.44058e+06	1.44058e+06	1.44058e+06	1.44058e+06	1.44058e+06	1.44058e+06	1.44058e+06	1.44974e+06	6.38497e+06	1.84892e+06	1.71078e+06	5.57178e+06	1.17302e+07	704403	1.48278e+06	1.8255e+06	679261	1.30173e+06	1.50372e+07	167653	1.6234e+06	8.6039e+06
0.812_240.147	3477	C12 H20 N2 O3	240.147	0.812	C07807	S4679	HMDB0015407			level4	Organoheterocyclic compounds	Pyridines and derivatives	Hydroxypyridines	NULL	781515	857116	722331	789935	830369	810415	680824	747741	826605	892764	755758	1.10074e+06	850171	869257	1.00791e+06	1.09083e+06	802133	1.10536e+06	542654	562312	618515	1.44679e+06	1.95909e+06	1.09759e+06	1.32453e+06	1.22044e+06
0.812_316.1002		C13 H21 N2 O3 P S	316.1	0.812						level5					339906	320258	261094	282946	316742	304430	294716	313393	347984	257095	310552	262909	321548	307678	364717	297037	463379	220745	737692	565435	375143	238700	391672	279846	297969	321556
0.813_430.0928		C8 H23 N4 O14 P	430.093	0.813						level5					79723.4	75343.7	83940.9	78537.7	76589.4	77517.1	80568.8	76359.7	84794	74241.4	79239.6	104296	316438	434288	366265	304325	284871	171129	152343	130353	107567	321445	392650	239965	199308	349455
0.813_542.2308		C23 H45 O8 P3	542.231	0.813						level5					110627	149013	116394	104406	106182	98492	109171	160261	78453.5	110295	138532	84472.2	105080	119136	103040	92331.7	97830.6	47228.8	453027	173086	165152	89424.9	136372	65929.8	79875.9	113635
0.814_389.2591		C20 H39 N O4 S	389.259	0.814						level5					8.50209e+07	8.71029e+07	8.81845e+07	8.41773e+07	8.88142e+07	8.0769e+07	9.26646e+07	8.25633e+07	8.937e+07	8.37426e+07	8.72866e+07	7.63564e+07	7.81636e+07	1.20803e+08	9.53995e+07	1.32227e+08	9.0756e+07	7.24654e+07	3.68461e+07	7.57103e+07	4.2035e+07	6.45564e+07	1.11316e+08	5.9458e+07	8.72085e+07	8.6563e+07
0.815_387.2455		C20 H39 N O2 P2	387.245	0.815						level5					892997	818412	1.04198e+06	761607	866301	957635	901374	807727	846949	1.01053e+06	831651	942553	1.34379e+06	1.19171e+06	822974	2.92711e+06	1.1973e+06	480265	116600	515310	225751	2.33215e+06	3.86565e+06	834657	2.07173e+06	894467
0.816_252.0779	Anisindione	C16 H12 O3	252.078	0.816		S2112	HMDB0015257			level4	Benzenoids	Indanes	Indanones		629889	568449	625849	605916	603369	615464	601204	603261	609350	587644	627916	90690.2	804887	611362	124122	159204	603167	4.19715e+06	1.03186e+06	741247	727520	107374	186088	160585	963699	301528
0.816_377.2593		C19 H39 N O4 S	377.259	0.816						level5					705606	844163	720406	673429	771621	709222	730789	752733	743655	654322	820160	1.16065e+06	1.30783e+06	1.65424e+06	944979	1.65217e+06	1.08941e+06	552910	369170	835399	622647	1.4125e+06	1.20091e+06	1.08163e+06	1.31244e+06	939623
0.817_303.1824		C18 H25 N O3	303.182	0.817						level5					278802	309395	276316	278646	327985	309247	282534	309466	265464	289846	315444	50350.2	220170	137922	65379.2	59550.7	1.09242e+06	1.31992e+06	100570	1.09675e+06	190464	56759.9	100355	42604.1	654271	75337.2
0.817_410.2301	Forskolin	C22 H34 O7	410.23	0.817	C09076	S43607				level4	Terpenoids	Diterpenoids (C20)	Others	NULL	1.25248e+06	1.25248e+06	1.25248e+06	1.25248e+06	1.25248e+06	1.25248e+06	1.25248e+06	1.25248e+06	1.25248e+06	1.25248e+06	1.25248e+06	1.16758e+06	812213	1.36786e+06	1.30651e+06	1.94836e+06	1.20319e+06	1.04941e+06	938528	1.53758e+06	1.0208e+06	1.24249e+06	1.56055e+06	980605	1.81838e+06	1.23748e+06
0.818_315.1824	Mitiglinide	C19 H25 N O3	315.182	0.818		S108739	HMDB0015382			level4	Phenylpropanoids and polyketides	Phenylpropanoic acids	null		185641	188258	202306	210510	133654	201234	192670	138208	170893	271817	165781	48923.3	74801.8	92089.6	66615.1	60157.6	745485	1.09758e+06	336782	619151	281403	57783.1	94667.9	43518.8	510536	74880.6
0.82_314.2812	2-hydroxynonadecanoic acid	C19 H38 O3	314.281	0.82		S4446043				level4					310894	254904	327990	308626	347319	247903	343516	340535	199952	322487	371957	61392.7	1.1377e+06	2.66644e+06	83536.6	1.92611e+06	1.06777e+06	112465	78635.5	1.07033e+06	77390.6	72466.6	118580	108813	115158	94058.6
0.82_411.2411	(5alpha,6beta,14beta,18r)-18-[(2s)-2-hydroxy-2-pentanyl]-6-methoxy-17-methyl-7,8-didehydro-18,19-dihydro-4,5-epoxy-6,14-ethenomorphinan-3-ol	C25 H33 N O4	411.241	0.82	C11793	S391633				level4				NULL	1.1012e+06	1.09038e+06	1.10114e+06	1.09921e+06	1.09682e+06	1.09772e+06	1.09773e+06	1.09816e+06	1.09553e+06	1.10033e+06	1.09697e+06	1.58794e+06	824008	555600	1.33321e+06	1.76227e+06	976955	709785	828601	1.30067e+06	705947	785478	841625	873128	636617	1.32979e+06
0.822_375.2444		C19 H39 N O2 P2	375.244	0.822						level5					2.79889e+06	2.72712e+06	2.90839e+06	2.71889e+06	2.58919e+06	2.63888e+06	2.89692e+06	2.29771e+06	2.63569e+06	3.04075e+06	2.92293e+06	3.28878e+06	3.58651e+06	4.5005e+06	3.04459e+06	7.22695e+06	3.65767e+06	2.32186e+06	1.00871e+06	2.16873e+06	1.2921e+06	4.06798e+06	6.80476e+06	2.19173e+06	3.93188e+06	3.73224e+06
0.823_387.2434		C20 H37 N O4 S	387.243	0.823						level5					1.49403e+08	1.55728e+08	1.69935e+08	1.50324e+08	1.5483e+08	1.50677e+08	1.56225e+08	1.52398e+08	1.54923e+08	1.51409e+08	1.62727e+08	1.40664e+08	1.95478e+08	1.67573e+08	1.48401e+08	2.00342e+08	1.91257e+08	1.19566e+08	8.79615e+07	1.73161e+08	1.11573e+08	2.62964e+08	3.54313e+08	1.81904e+08	2.55501e+08	1.72226e+08
0.824_385.2278		C20 H35 N O4 S	385.228	0.824						level5					6.48845e+06	6.48845e+06	6.48845e+06	6.48845e+06	6.48845e+06	6.48845e+06	6.48845e+06	6.48845e+06	6.48845e+06	6.48845e+06	6.48845e+06	4.51365e+06	7.42969e+06	6.6679e+06	4.90391e+06	6.45813e+06	1.20716e+07	5.62767e+06	5.19258e+06	9.77169e+06	5.92896e+06	1.0165e+07	9.01939e+06	7.1401e+06	1.30794e+07	8.0135e+06
0.825_182.084	Trans-azobenzene	C12 H10 N2	182.084	0.825	C19334	S2185				level4				NULL	957287	957287	957287	957287	957287	957287	957287	957287	957287	957287	957287	58451.5	246741	1.97912e+06	449129	1.4038e+06	1.6013e+06	596644	1.39072e+06	1.50968e+06	869504	612130	107866	1.00073e+06	669169	294245
0.828_260.0942		C17 H12 N2 O	260.094	0.828						level5					1.68118e+06	1.60553e+06	1.64036e+06	1.49807e+06	1.83048e+06	1.65596e+06	1.65664e+06	1.56138e+06	1.57048e+06	1.77999e+06	1.65682e+06	98491.1	3.97409e+06	804761	100144	92568.6	851836	3.15484e+06	2.49903e+06	957827	2.50171e+06	141573	144731	133767	1.94268e+06	986583
0.828_594.3509		C35 H52 N2 O2 P2	594.351	0.828						level5					129399	123813	133298	137228	123738	120165	131937	126249	137380	129763	122296	130867	144671	161835	139398	127868	149243	159898	129476	139513	127337	546924	620343	711127	210199	223650
0.831_322.2265		C16 H35 O4 P	322.226	0.831						level5					684283	771053	817843	765598	748434	748609	776904	794920	783382	699785	745410	1.21211e+06	758917	830212	951991	4.24813e+06	949624	588835	410609	590077	369845	1.15752e+06	1.27731e+06	691402	875962	769640
0.831_363.2435		C18 H37 N O4 S	363.243	0.831						level5					1.52625e+08	1.50929e+08	1.53649e+08	1.51589e+08	1.52291e+08	1.52212e+08	1.5221e+08	1.52281e+08	1.52318e+08	1.51732e+08	1.52529e+08	1.81331e+08	1.95718e+08	2.68129e+08	1.79964e+08	3.01432e+08	1.67249e+08	1.33069e+08	8.30987e+07	1.49289e+08	9.67617e+07	2.2394e+08	2.40215e+08	1.96236e+08	2.09584e+08	1.79502e+08
0.831_403.2384		C20 H37 N O5 S	403.238	0.831						level5					5.55833e+06	5.55833e+06	5.55833e+06	5.55833e+06	5.55833e+06	5.55833e+06	5.55833e+06	5.55833e+06	5.55833e+06	5.55833e+06	5.55833e+06	3.93534e+06	6.37451e+06	5.56106e+06	5.52826e+06	5.66486e+06	1.00148e+07	4.87128e+06	4.46127e+06	8.11604e+06	5.29601e+06	9.5164e+06	8.411e+06	8.54352e+06	1.44286e+07	6.69945e+06
0.831_562.496		C36 H66 O4	562.496	0.831						level5					818305	619793	715129	812140	694655	633324	755331	562840	628376	627719	1.13371e+06	515147	896903	790746	802346	775380	1.78176e+06	724286	693928	1.38293e+06	762154	547607	506949	2.14697e+06	261051	974274
0.832_183.1256	Methyprylon	C10 H17 N O2	183.126	0.832		S4018	HMDB0015239			level4	Organoheterocyclic compounds	Piperidines	Piperidinones		2.42829e+06	2.42829e+06	2.42829e+06	2.42829e+06	2.42829e+06	2.42829e+06	2.42829e+06	2.42829e+06	2.42829e+06	2.42829e+06	2.42829e+06	2.45114e+06	2.18907e+06	2.46024e+06	2.75473e+06	2.17269e+06	2.89667e+06	2.85266e+06	1.83329e+06	2.39882e+06	1.84224e+06	3.81836e+06	3.53606e+06	3.27189e+06	3.66379e+06	3.25718e+06
0.832_226.1311	Pentobarbital	C11 H18 N2 O3	226.131	0.832	C07422	S4575	HMDB0014457			level4	Organoheterocyclic compounds	Diazines	Pyrimidines and pyrimidine derivatives	NULL	1.03426e+09	1.01943e+09	1.03256e+09	1.0511e+09	1.04747e+09	1.03109e+09	1.04228e+09	1.04215e+09	9.55212e+08	1.0819e+09	1.06319e+09	9.93348e+08	1.01579e+09	1.1882e+09	1.09519e+09	9.71723e+08	1.10464e+09	1.35784e+09	9.35729e+08	9.58562e+08	9.95767e+08	1.6289e+09	1.64213e+09	1.5235e+09	1.86487e+09	1.37245e+09
0.832_361.228		C18 H35 N O4 S	361.228	0.832						level5					3.07406e+07	3.18556e+07	3.0891e+07	3.06056e+07	3.14007e+07	3.10665e+07	3.11522e+07	3.11767e+07	3.05906e+07	3.1215e+07	3.13562e+07	2.42892e+07	2.37385e+07	3.70459e+07	3.7256e+07	5.93883e+07	3.49921e+07	2.30365e+07	1.73336e+07	2.89657e+07	1.66645e+07	1.12433e+07	2.17179e+07	1.88362e+07	2.35064e+07	3.68505e+07
0.835_468.3072	1-myristoyl-sn-glycero-3-phosphocholine	C22 H47 N O7 P	468.307	0.835		S392536				level4					4.07477e+06	4.0646e+06	4.77842e+06	4.37448e+06	4.40033e+06	4.0598e+06	4.09874e+06	4.87419e+06	3.44616e+06	4.75951e+06	4.4305e+06	6.02208e+06	3.67523e+06	6.26766e+06	2.09821e+07	5.05707e+06	5.7465e+06	2.68144e+06	1.79196e+06	3.83541e+06	2.12742e+06	1.18566e+07	2.99716e+06	3.09988e+06	1.8185e+06	1.05826e+06
0.835_611.3588		C26 H53 N5 O9 S	611.359	0.835						level5					587361	603773	687093	687278	507619	541785	687470	574772	606463	596759	628106	681197	602499	838412	813650	665355	637965	354357	522683	857442	415290	542669	618945	453729	573322	571429
0.836_352.1626		C17 H24 N2 O6	352.163	0.836						level5					487560	468029	481031	502236	470421	481690	481540	483657	481640	474422	487339	68768.7	341094	103451	80031	96619	1.89481e+06	1.99185e+06	422099	1.83121e+06	326678	146688	101598	120117	647953	111492
0.837_474.2442		C19 H34 N6 O8	474.244	0.837						level5					7.98486e+06	8.02646e+06	8.27844e+06	7.94573e+06	8.02566e+06	8.04704e+06	8.05528e+06	8.04092e+06	8.18173e+06	7.83662e+06	8.14841e+06	6.95162e+06	5.70534e+06	8.32707e+06	8.8465e+06	5.57014e+06	7.87097e+06	8.40548e+06	1.07141e+07	9.64619e+06	8.87166e+06	9.34251e+06	8.06393e+06	8.80996e+06	8.52915e+06	8.42125e+06
0.838_284.0893	Mfcd08277028	C13 H16 O7	284.089	0.838		S135751	HMDB0011686			level4	Organic oxygen compounds	Organooxygen compounds	Carbohydrates and carbohydrate conjugates		922685	885874	861095	958814	955462	901290	897574	955524	960967	791269	973009	770234	511825	635928	1.04822e+06	581300	1.30997e+06	512982	2.83e+06	1.8071e+06	1.32768e+06	770830	515782	838056	465374	933491
0.838_289.1669	Atropine	C17 H23 N O3	289.167	0.838	C01479	S10194105	HMDB0014712			level4	Alkaloids and derivatives	Tropane alkaloids	null		2.00181e+06	1.91098e+06	1.91194e+06	1.91554e+06	1.90598e+06	1.9222e+06	1.94925e+06	1.97141e+06	1.78758e+06	1.9657e+06	1.99752e+06	84174.7	1.41664e+06	782007	68658.7	81943.5	6.56492e+06	8.09134e+06	1.54772e+06	5.80387e+06	1.25631e+06	127928	119705	324893	2.70334e+06	322012
0.838_451.1765		C21 H29 N3 O6 S	451.176	0.838						level5					106448	106448	106448	106448	106448	106448	106448	106448	106448	106448	106448	98798.9	63299.5	96326.7	41115.7	73712.1	130277	73591.8	47454.6	88403.8	52668.1	75229.1	78814.2	77280.3	475832	80361.2
0.839_584.4793		C31 H64 N6 O2 S	584.479	0.839						level5					1.17576e+06	1.13663e+06	1.1482e+06	1.14873e+06	1.13521e+06	1.09954e+06	1.13639e+06	1.23461e+06	1.06834e+06	1.11805e+06	1.19056e+06	914783	1.19549e+06	1.05175e+06	1.48666e+06	752025	1.52059e+06	1.23154e+06	925159	1.42633e+06	816732	247388	390539	3.69861e+06	820405	1.30103e+06
0.84_400.2604	(+)-ophiobolin a	C25 H36 O4	400.26	0.84	C09145	S4444744				level4	PR Prenol Lipids	PR01 Isoprenoids	PR0105 C25 isoprenoids (sesterterpenes)	NULL	1.16226e+06	1.36432e+06	1.30026e+06	1.13517e+06	1.28692e+06	1.19398e+06	1.23854e+06	1.15836e+06	1.2796e+06	1.20278e+06	1.32584e+06	965085	1.03643e+06	1.40036e+06	981100	1.65974e+06	2.33115e+06	1.09705e+06	963845	1.87907e+06	974791	254547	77965	3.49282e+06	1.66745e+06	1.06758e+06
0.84_560.4801		C30 H65 N4 O3 P	560.48	0.84						level5					1.53569e+06	1.98317e+06	1.6374e+06	1.86854e+06	1.84506e+06	1.71531e+06	1.72564e+06	1.87625e+06	1.595e+06	1.82655e+06	1.77082e+06	1.12792e+06	1.82455e+06	1.33371e+06	1.38173e+06	1.72871e+06	3.72797e+06	1.42824e+06	1.55484e+06	3.51384e+06	1.42072e+06	816181	1.00813e+06	7.2083e+06	206498	1.93048e+06
0.841_192.0783	Af4878000	C11 H12 O3	192.078	0.841		S6902	HMDB0040268			level4	Organic oxygen compounds	Organooxygen compounds	Carbonyl compounds		305863	308205	384242	376233	326029	341613	350508	347576	389087	261258	365125	122513	1.30496e+06	147327	124755	113097	265003	653231	961341	364186	1.07171e+06	176984	172686	166718	532996	239708
0.841_491.2513		C27 H41 N O3 S2	491.251	0.841						level5					347665	324907	462029	338407	422706	290412	358347	414286	333958	386114	360314	232657	457878	115009	554979	678903	139558	82378.5	391889	69305.9	608409	2.08167e+06	3.42793e+06	383092	969793	415484
0.842_224.1158	Butalbital	C11 H16 N2 O3	224.116	0.842		S2387	HMDB0014386			level4	Organoheterocyclic compounds	Diazines	Pyrimidines and pyrimidine derivatives		1.23925e+06	1.25769e+06	1.27745e+06	1.29091e+06	1.22546e+06	1.11111e+06	1.28152e+06	1.21295e+06	1.19258e+06	1.34376e+06	1.24328e+06	769573	1.02424e+06	1.7758e+06	1.73134e+06	2.33356e+06	1.0446e+06	1.64151e+06	968893	799934	908371	822988	2.43996e+06	930744	1.18897e+06	1.57967e+06
0.842_295.0836	1-hydroxy-2,3-dimethoxydibenz[cd,f]indol-4(5h)-one	C17 H13 N O4	295.084	0.842		S22370392	HMDB0038583			level4	Alkaloids and derivatives	Aristolactams	null		1.60399e+06	1.4647e+06	1.60145e+06	1.51749e+06	1.64459e+06	1.56132e+06	1.64418e+06	1.54856e+06	1.50386e+06	1.50559e+06	1.66492e+06	84469.8	6.68092e+06	1.47169e+06	68513	82800.7	688115	2.18189e+06	1.66332e+06	773859	2.66299e+06	127415	87580.5	117731	2.90401e+06	913127
0.842_349.2279	Mavorixafor	C21 H27 N5	349.228	0.842	C20266	S9431613				level4					647719	642477	764698	597446	708394	610930	827240	766002	720249	489499	700845	686360	1.17049e+06	1.18204e+06	691949	1.2542e+06	875402	663990	472099	786780	533932	1.47094e+06	1.03003e+06	815373	1.73675e+06	1.14704e+06
0.842_551.3071		C26 H52 N O5 P3	551.307	0.842						level5					630403	692045	638520	593962	681204	634404	636499	640845	698627	617390	634038	481687	666403	894462	1.02162e+06	565535	1.19637e+06	358341	669983	1.21235e+06	418006	232372	254494	556903	493271	504761
0.843_448.2208		C14 H37 N6 O6 P S	448.221	0.843						level5					1.26472e+06	1.51429e+06	1.32902e+06	1.35541e+06	1.34711e+06	1.04702e+06	1.33577e+06	1.47655e+06	1.2777e+06	1.23654e+06	1.42615e+06	951063	863447	1.36986e+06	1.4436e+06	1.296e+06	1.2286e+06	715475	1.711e+06	2.16807e+06	909047	923683	992406	960061	942162	1.10348e+06
0.844_240.0779	3-hydroxyflavanone	C15 H12 O3	240.078	0.844	C15570	S130313				level4				NULL	3.06594e+06	3.2383e+06	3.35553e+06	3.46385e+06	3.08144e+06	3.1306e+06	3.30607e+06	3.07415e+06	3.08058e+06	3.2446e+06	3.46331e+06	79636.5	3.87328e+06	261622	62988.8	46168.8	4.55123e+06	1.76881e+07	1.11486e+07	3.98986e+06	7.03136e+06	117469	77214.2	195435	5.81173e+06	2.28465e+06
0.844_288.0892		C12 H13 N6 O P	288.089	0.844						level5					205229	237946	209114	242536	226558	224109	214933	238602	199753	224361	236146	80449.1	940665	182412	66571.2	51788.1	218398	603867	487815	173017	446690	122504	90012.6	100583	435451	154883
0.844_294.1183		C9 H18 N4 O7	294.118	0.844						level5					1.10986e+07	1.10986e+07	1.10986e+07	1.10986e+07	1.10986e+07	1.10986e+07	1.10986e+07	1.10986e+07	1.10986e+07	1.10986e+07	1.10986e+07	9.48642e+06	8.18924e+06	9.69658e+06	1.25249e+07	8.71351e+06	1.19223e+07	7.18479e+06	1.87511e+07	2.02581e+07	1.41696e+07	8.20061e+06	6.2785e+06	8.58385e+06	7.89351e+06	1.11395e+07
0.844_463.204		C17 H40 N O7 P3	463.204	0.844						level5					133505	305671	268781	272289	242614	201909	258720	258214	192343	307085	184768	472388	103713	753166	513050	1.20866e+06	126947	154691	102443	106889	99943.1	421993	1.71907e+06	335666	169008	269139
0.846_311.1085		C10 H22 N3 O4 P S	311.108	0.846						level5					4.90818e+06	4.9737e+06	5.31265e+06	4.8849e+06	4.89849e+06	4.24212e+06	5.15472e+06	4.7638e+06	4.46905e+06	5.2884e+06	5.23781e+06	4.52809e+06	2.78877e+06	3.9107e+06	4.0754e+06	2.75186e+06	4.77015e+06	3.40901e+06	9.31356e+06	8.10041e+06	6.20221e+06	3.18728e+06	2.9246e+06	3.59331e+06	3.61355e+06	4.28673e+06
0.847_401.2229		C20 H37 N O3 P2	401.223	0.847						level5					449724	550831	513276	480134	510339	504813	523215	498493	533963	465453	495478	902782	887738	480591	968842	467793	353386	128541	186862	222051	324445	1.26487e+06	1.43471e+06	2.13857e+06	868452	574881
0.848_467.2516		C25 H41 N O3 S2	467.252	0.848						level5					620660	702166	698184	651478	634645	634069	629501	691013	656892	595871	714677	518850	770540	305050	1.12601e+06	1.05552e+06	179508	121611	524657	66002	759890	3.62952e+06	7.0865e+06	649453	1.63991e+06	845576
0.85_335.2123		C16 H33 N O4 S	335.212	0.85						level5					1.66131e+06	1.73698e+06	1.82883e+06	1.79833e+06	1.55191e+06	1.62085e+06	1.85252e+06	1.74591e+06	1.64136e+06	1.83628e+06	1.59536e+06	1.98842e+06	1.67197e+06	2.93367e+06	1.99885e+06	4.03163e+06	1.98538e+06	1.18271e+06	978225	1.50697e+06	960780	1.4145e+06	1.53484e+06	1.24154e+06	1.62088e+06	2.2907e+06
0.851_168.0784	Dc2810000	C9 H12 O3	168.078	0.851		S21111723	HMDB0059963			level4	Benzenoids	Phenol ethers	Anisoles		903749	843475	878644	895649	871746	880683	877679	878935	878315	879938	877666	1.46998e+06	320930	2.82558e+06	911828	2.78444e+06	358209	693922	118267	290185	113938	1.24188e+06	787733	933674	304725	521618
0.851_175.063	Indole-3-acetic acid	C10 H9 N O2	175.063	0.851	C00954	MReference-445	HMDB0000197	72.2	82.9	level1	Organoheterocyclic compounds	Indoles and derivatives	Indolyl carboxylic acids and derivatives	map00380 Tryptophan metabolism; map01100 Metabolic pathways;	5.647e+06	2.94775e+06	6.02182e+06	3.00811e+06	5.65925e+06	5.52016e+06	4.69258e+06	4.73031e+06	4.03987e+06	4.65045e+06	4.44082e+06	3.22692e+06	1.17927e+07	4.62794e+06	2.26585e+06	1.84291e+06	3.43612e+06	6.54591e+06	5.33415e+06	2.7842e+06	8.8971e+06	3.30621e+06	4.48322e+06	2.69101e+06	5.57906e+06	3.56204e+06
0.851_356.2921	1-oleoyl-rac-glycerol	C21 H40 O4	356.292	0.851		S4446588				level4					825988	702045	810072	752348	745968	733130	828165	752570	736464	765807	785199	1.0697e+06	4.54611e+06	1.45221e+06	816327	1.59141e+06	1.44849e+06	1.35588e+06	705301	1.08256e+06	623963	192986	5.18459e+06	2.5445e+06	1.1028e+06	1.00466e+06
0.851_376.2606	3beta,17beta-diacetoxy-5alpha-androstane	C23 H36 O4	376.261	0.851	C15346	S194608				level4				NULL	2.42248e+06	2.51895e+06	2.4389e+06	2.34834e+06	2.50443e+06	2.17053e+06	2.57785e+06	2.4601e+06	2.40289e+06	2.41691e+06	2.41774e+06	2.15891e+06	2.32204e+06	3.37223e+06	2.19115e+06	3.13528e+06	3.78492e+06	2.4939e+06	2.00076e+06	3.0874e+06	1.55892e+06	639406	147044	7.96035e+06	3.3489e+06	2.15133e+06
0.852_277.1094	At6200000	C18 H15 N O2	277.109	0.852		S212674				level4					7.70702e+06	7.35076e+06	7.95371e+06	8.6963e+06	6.89494e+06	7.7367e+06	7.76569e+06	7.72501e+06	7.01459e+06	7.34497e+06	8.73754e+06	115378	6.57051e+06	317174	54466.1	37365.9	8.90758e+06	3.23384e+07	4.03699e+07	8.92215e+06	2.30167e+07	202973	70236.8	309061	1.73692e+07	5.32145e+06
0.853_320.1615	3653579	C18 H24 O5	320.161	0.853	C14751	S4941916	HMDB0041838			level4	Fungal toxins	Mycotoxins	Others	NULL	239240	288158	210665	213016	252210	238658	246597	231894	228790	266246	229526	51068	886595	63077.8	10852.3	16622.3	118349	234032	143088	68116.7	329041	50411.1	28572.1	53467.1	171817	110971
0.854_275.1515	Rolipram	C16 H21 N O3	275.151	0.854		S4913				level4					211382	209676	209769	258437	194436	214755	214847	217500	219583	205492	220645	35559.6	186491	126533	14907.9	14987.7	751962	874446	76126.9	450302	85872.5	38224.6	14415.2	36061.2	407546	32193.6
0.854_445.2676		C23 H43 N O3 S2	445.268	0.854						level5					408001	387168	381008	375404	415615	392747	393136	391093	398799	391644	390848	309882	588842	257967	791730	962926	236918	127402	350410	134877	512007	1.45312e+06	2.86486e+06	408747	873277	606512
0.854_466.1366		C24 H22 N2 O8	466.137	0.854						level5					144242	65392.9	133529	74822.5	112166	84625	92754.3	134493	83804	100823	98095.5	53175.8	306434	17169.9	10807.7	17233.2	50938.4	691668	448947	149194	195778	93586.6	32412.3	52896.6	90692.4	99011.5
0.854_777.5073		C42 H72 N3 O8 P	777.507	0.854						level5					461887	265841	335913	224336	581354	387572	383655	202168	416144	401752	396892	84896.6	594331	21649.7	282790	650570	4.57836e+06	73324.5	5.31451e+06	4.74554e+06	6.7618e+06	246653	842206	69002.3	154983	284262
0.855_447.2096		C18 H36 N5 O2 P3	447.21	0.855						level5					457146	612818	460683	531773	502333	496474	499400	483829	522254	459019	574400	648759	287449	603115	363412	671163	297281	206712	236742	170098	162016	1.03676e+06	892277	1.09312e+06	276953	948057
0.855_454.2193			454.219	0.855						level5					204631	231359	172648	219560	197186	203791	204132	204194	225046	185089	205978	271849	193415	230751	179396	214516	234231	252618	180425	190499	175997	738920	483188	1.44857e+06	299161	490299
0.856_180.042	4-hydroxyphenylpyruvic acid	C9 H8 O4	180.042	0.856	C01179	MReference-1301	HMDB0000707	41.4	90	level2	Benzenoids	Benzene and substituted derivatives	Phenylpyruvic acid derivatives	map00130 Ubiquinone and other terpenoid-quinone biosynthesis; map00350 Tyrosine metabolism; map00400 Phenylalanine, tyrosine and tryptophan biosynthesis; map01100 Metabolic pathways; map01210 2-Oxocarboxylic acid metabolism; map01230 Biosynthesis of amino acids;	9.62536e+06	9.88339e+06	9.3007e+06	1.02318e+07	9.95811e+06	1.03262e+07	9.39802e+06	9.85635e+06	9.78913e+06	9.87678e+06	9.83305e+06	58962.8	5.54697e+07	1.10127e+07	11806.6	18564.1	3.63522e+06	1.37908e+07	7.99509e+06	2.85447e+06	1.47724e+07	248334	150472	1.20617e+06	1.77722e+07	8.29392e+06
0.858_316.094	Byakangelicol	C17 H16 O6	316.094	0.858	C16925	S2316728				level4				NULL	326246	319527	298585	330183	315027	314651	314883	309757	341790	314517	307057	25916.1	548234	37615.3	13034	21053	372997	1.94067e+06	606824	369169	394704	59845.3	24078.7	61587.5	761615	129081
0.859_354.2764	Mfcd00270409	C21 H38 O4	354.276	0.859		S4446589				level4					3.11408e+06	3.12531e+06	3.03571e+06	3.17511e+06	3.14747e+06	3.10415e+06	3.11165e+06	3.13781e+06	3.10591e+06	3.09912e+06	3.13081e+06	1.87447e+06	3.2933e+06	4.29233e+06	3.24907e+06	4.49632e+06	5.70559e+06	3.6272e+06	2.09548e+06	3.85412e+06	1.64916e+06	390160	228565	6.05263e+06	2.77367e+06	2.98759e+06
0.859_430.2197			430.22	0.859						level5					861561	589660	678662	876593	871341	921161	638353	809335	684415	847881	787116	808961	527638	658573	509671	904786	269435	361826	301432	312617	298301	1.33414e+06	1.45428e+06	1.44876e+06	250377	1.16293e+06
0.86_266.0572	Phenanthrene-4,5-dicarboxylate	C16 H10 O4	266.057	0.86	C18252	S85790				level4					200159	196312	208070	200379	197471	200192	200868	201697	192072	210615	197666	22002.1	350018	17089.8	10616.5	10523	116567	2.40171e+06	398149	117668	258497	49374.7	17332.7	52461.3	153572	54833.8
0.862_431.2145		C16 H39 N3 O4 P2 S	431.214	0.862						level5					2.08718e+06	2.323e+06	2.28557e+06	2.21405e+06	2.15271e+06	2.23094e+06	2.17209e+06	2.22461e+06	2.10061e+06	2.26972e+06	2.26171e+06	2.85922e+06	2.35661e+06	2.21184e+06	1.22728e+06	1.65729e+06	1.11622e+06	1.3635e+06	1.31918e+06	1.13119e+06	1.21413e+06	3.06539e+06	3.97224e+06	4.466e+06	1.53617e+06	4.02626e+06
0.862_457.2301		C23 H39 N O4 S2	457.23	0.862						level5					807156	643170	822772	857002	736484	738555	763664	749706	708469	808335	799820	1.31914e+06	917907	217537	414923	213740	317063	509620	635822	280704	537524	1.50235e+06	1.09897e+06	1.72668e+06	496697	2.09945e+06
0.867_119.037	Phenylisocyanate	C7 H5 N O	119.037	0.867		S7389	HMDB0062270			level4	Benzenoids	Benzene and substituted derivatives	null		1.9193e+06	1.93545e+06	1.89111e+06	1.9458e+06	1.91447e+06	1.92104e+06	1.9211e+06	1.92235e+06	1.91263e+06	1.9327e+06	1.91691e+06	95273.3	8.03525e+06	1.01209e+06	76403.6	84605.1	1.86356e+06	3.65269e+06	4.5526e+06	1.9299e+06	3.98849e+06	113672	120345	420928	4.47314e+06	1.70193e+06
0.867_543.2938		C30 H45 N3 O2 S2	543.294	0.867						level5					635509	678922	638041	700887	626443	648080	651222	665861	715606	580864	670592	529270	591925	594734	758950	901570	568240	504581	721958	535958	701903	1.33402e+06	1.19982e+06	339769	551706	510622
0.868_243.0889	Alonimid	C14 H13 N O3	243.089	0.868		S16932				level4					337131	335770	341564	286418	347458	350429	288137	301685	376705	340372	317706	7078.59	2.1848e+06	181902	12409.7	13484.1	314579	298718	457690	230066	932476	15480.3	28222.6	37893.9	55204.2	413946
0.868_419.2516		C21 H41 N O3 S2	419.252	0.868						level5					761356	711323	698499	771245	737756	724832	738315	748136	710381	756814	725958	550316	1.01589e+06	474227	1.10574e+06	1.69283e+06	373993	209541	701411	260611	1.11676e+06	3.06135e+06	3.9291e+06	1.10948e+06	1.66699e+06	1.20348e+06
0.869_440.2401		C27 H38 O P2	440.24	0.869						level5					734192	647356	663096	696558	706080	689042	689391	681823	721347	656238	697054	1.48673e+06	810794	245979	385171	262307	285095	806420	479665	291215	538020	1.52797e+06	1.36143e+06	1.67527e+06	456140	1.38066e+06
0.869_558.4644		C30 H63 N4 O3 P	558.464	0.869						level5					3.4446e+06	3.80685e+06	3.99695e+06	3.39939e+06	2.75043e+06	3.66774e+06	3.97867e+06	3.55254e+06	3.41116e+06	2.98257e+06	3.89151e+06	4.44519e+06	4.72417e+06	4.26996e+06	3.18871e+06	6.65439e+06	7.4506e+06	4.02999e+06	5.46586e+06	6.25316e+06	560785	5.32277e+06	6.87177e+06	8.37982e+06	6.19902e+06	6.55133e+06
0.87_205.0734	5-methoxyindoleacetic acid	C11 H11 N O3	205.073	0.87	C05660	MReference-260	HMDB0004096		79.7	level2	Organoheterocyclic compounds	Indoles and derivatives	Indolyl carboxylic acids and derivatives	map00380 Tryptophan metabolism;	1.71183e+07	1.9286e+07	1.83317e+07	1.85291e+07	1.97927e+07	1.78974e+07	1.76157e+07	1.84284e+07	1.8679e+07	1.85357e+07	1.8664e+07	143172	6.38418e+07	3.76062e+06	173239	126099	4.47669e+07	7.39206e+07	5.95549e+07	3.50923e+07	5.32165e+07	134479	145682	8.79556e+06	2.74149e+07	1.44768e+07
0.87_290.1046		C18 H14 N2 O2	290.105	0.87						level5					246573	235045	226591	228234	269737	251102	250207	236240	230162	285311	213713	13111.4	950003	134435	20474.8	22448.8	124181	673307	469568	142292	509632	25483.7	62275.9	18174.1	407316	162817
0.871_416.241	Tonapofylline	C22 H32 N4 O4	416.241	0.871		S187607				level4					146469	143702	128169	129823	133291	131061	154217	117687	148677	121597	151620	324397	74585.6	27127.6	37893.8	41424.7	15842.5	18094.4	47623.9	14429.4	44730.5	706976	599649	492159	36671.3	528853
0.871_443.2518		C23 H41 N O3 S2	443.252	0.871						level5					580052	580163	575148	592769	617895	573733	587155	582470	562417	596714	605819	326163	814812	228279	626495	755124	261778	103448	525101	206840	947856	2.97582e+06	4.98245e+06	653145	1.49613e+06	692122
0.871_534.4631		C29 H62 N2 O6	534.463	0.871						level5					4.44965e+06	4.57578e+06	4.23643e+06	4.49027e+06	4.23222e+06	4.30414e+06	4.25319e+06	4.74328e+06	4.62832e+06	4.28991e+06	4.096e+06	6.19769e+06	8.81155e+06	6.23106e+06	4.87758e+06	9.97278e+06	4.64987e+06	6.29631e+06	5.26639e+06	3.90596e+06	5.25664e+06	7.71366e+06	7.13785e+06	1.14239e+07	9.68587e+06	7.89369e+06
0.873_258.0885	Yangonin	C15 H14 O4	258.089	0.873	C09980	S4444896	HMDB0034144			level4	Phenylpropanoids and polyketides	Kavalactones	null		5.26292e+06	5.15717e+06	5.58412e+06	5.30456e+06	5.51877e+06	4.8493e+06	5.40059e+06	5.0667e+06	5.55675e+06	5.09198e+06	5.56818e+06	5.84438e+06	1.83552e+07	5.29753e+06	903458	7.34172e+06	2.8436e+06	272722	8.76524e+06	2.36995e+06	1.55489e+07	75622.2	186340	1.40567e+07	2.86317e+06	7.185e+06
0.873_263.0938	?-naphthyl anthranilate	C17 H13 N O2	263.094	0.873		S56029	HMDB0039873			level4	Benzenoids	Naphthalenes	null		701223	701223	701223	701223	701223	701223	701223	701223	701223	701223	701223	9516.66	1.41664e+06	64022.2	14735.9	16405.9	753621	3.84569e+06	1.43177e+06	802881	1.15982e+06	18345.8	36844	27021.3	709426	496733
0.874_179.0943	Phenacetin	C10 H13 N O2	179.094	0.874	C07591	S4590			70.7	level4				NULL	1.02446e+07	9.6656e+06	9.77924e+06	9.7882e+06	9.76508e+06	9.92943e+06	9.60159e+06	9.99456e+06	9.5348e+06	1.02268e+07	9.792e+06	67727.1	1.82804e+07	3.24291e+06	50064	102551	1.21994e+07	1.49484e+07	8.24867e+06	1.04988e+07	1.04243e+07	202731	105981	1.03303e+06	2.01503e+07	3.47187e+06
0.875_205.0193		C10 H7 N O2 S	205.019	0.875						level5					3.07969e+06	2.91097e+06	3.23749e+06	3.04954e+06	3.00656e+06	3.04073e+06	3.04787e+06	3.0649e+06	3.22682e+06	2.87761e+06	3.07022e+06	42791	6.0192e+06	4.62509e+06	41690.6	36905.9	3.20892e+06	1.01973e+07	2.97209e+06	2.70023e+06	3.42943e+06	261192	65878.3	1.339e+06	7.7475e+06	1.58732e+06
0.876_414.2245	Methyl 5-hydroperoxy-5-{5'-[(1e,3e)-1,3-nonadien-1-yl]-3,3'-bi-1,2-dioxol-5-yl}pentanoate	C21 H34 O8	414.224	0.876		S4446021			47.3	level4					3.69697e+06	4.95517e+06	4.34386e+06	4.01513e+06	3.93784e+06	3.57698e+06	4.38278e+06	4.65217e+06	4.56022e+06	3.83742e+06	3.6877e+06	5.79017e+06	4.00522e+06	4.93157e+06	5.20159e+06	3.79488e+06	2.90595e+06	3.01613e+06	1.9649e+06	1.51288e+06	1.85361e+06	6.78186e+06	1.11991e+07	6.44329e+06	2.58779e+06	4.80659e+06
0.877_765.5598		C44 H79 N O7 S	765.56	0.877						level5					2.73288e+06	2.67074e+06	2.63494e+06	2.73435e+06	2.7282e+06	2.69519e+06	2.66132e+06	2.74729e+06	2.78136e+06	2.58527e+06	2.71142e+06	1.83072e+06	6.36166e+06	8.24731e+06	1.46129e+06	3.42758e+06	2.85187e+06	5.41371e+06	4.74714e+06	2.01387e+06	3.86023e+06	7.14213e+06	5.45217e+06	3.20647e+06	2.9958e+06	3.48383e+06
0.878_225.0454		C10 H11 N O3 S	225.045	0.878						level5					4.10209e+07	4.0705e+07	3.98379e+07	4.0369e+07	4.21578e+07	4.07414e+07	3.98659e+07	4.10596e+07	4.22747e+07	4.0392e+07	3.99211e+07	75595.2	7.92906e+07	1.23976e+07	124081	112736	4.77603e+07	4.59579e+07	2.43278e+07	4.16761e+07	3.87905e+07	511420	188320	3.91573e+06	8.78123e+07	1.37238e+07
0.878_419.2331		C20 H37 N O6 S	419.233	0.878						level5					531413	641278	598377	555383	583138	572612	575571	628353	628226	524184	560349	1.01868e+06	1.12924e+06	621581	1.13476e+06	571349	430838	143052	221306	269314	378505	1.51745e+06	3.19356e+06	2.31631e+06	926946	659432
0.879_161.0838	3-(2-hydroxyethyl)indole	C10 H11 N O	161.084	0.879	C00955	MReference-182	HMDB0003447		70.4	level2	Organoheterocyclic compounds	Indoles and derivatives	Indoles	map00380 Tryptophan metabolism;	9.60992e+06	9.12673e+06	9.20594e+06	9.21655e+06	9.19278e+06	9.29048e+06	8.94258e+06	9.33131e+06	9.1586e+06	9.60452e+06	9.14686e+06	11460.1	1.74543e+07	3.03566e+06	31312.6	28163.2	1.1078e+07	1.21373e+07	6.22943e+06	9.44985e+06	9.23167e+06	86354.6	56740.8	867271	1.89032e+07	2.99557e+06
0.879_220.0035		C7 H8 O6 S	220.004	0.879						level5					396837	396837	396837	396837	396837	396837	396837	396837	396837	396837	396837	170908	228520	126100	36100.5	46571.4	429923	264282	2.84302e+06	1.66713e+06	3.82853e+06	82244.6	47502.5	154661	70088.6	62586.2
0.88_534.3175	Neriifolin	C30 H46 O8	534.317	0.88	C08876	S390443				level4	Steroids	23-Carbon atoms	Cardanolide derivatives [Fig]	NULL	2.60563e+06	2.65746e+06	2.54754e+06	2.5208e+06	2.60299e+06	2.57474e+06	2.58953e+06	2.54069e+06	2.79877e+06	2.47041e+06	2.55394e+06	2.54168e+06	3.22128e+06	4.3834e+06	4.51345e+06	3.11035e+06	3.85856e+06	1.98948e+06	1.67265e+06	2.89147e+06	1.6479e+06	2.18464e+06	2.72812e+06	2.76372e+06	3.02579e+06	2.26118e+06
0.882_138.0315	Salicylic acid	C7 H6 O3	138.031	0.882	C00805	S331	HMDB0001895			level4	Benzenoids	Benzene and substituted derivatives	Benzoic acids and derivatives	map00360 Phenylalanine metabolism; map01100 Metabolic pathways; map04976 Bile secretion;	1.4952e+06	1.37655e+06	1.55465e+06	1.41936e+06	1.58114e+06	1.72105e+06	1.37366e+06	1.44849e+06	1.29428e+06	1.91828e+06	1.39254e+06	1.63231e+06	1.14835e+06	1.48557e+06	1.48098e+06	2.14322e+06	1.72371e+06	2.72845e+06	1.1391e+06	1.19741e+06	1.16246e+06	778066	1.25648e+06	2.45269e+06	1.0354e+06	2.56622e+06
0.882_463.3093		C30 H41 N O3	463.309	0.882						level5					1.83869e+06	1.7414e+06	1.51664e+06	1.83334e+06	1.41528e+06	1.72432e+06	1.61351e+06	1.6314e+06	1.66405e+06	1.72829e+06	1.67476e+06	1.61674e+06	2.72388e+06	1.71245e+06	1.90917e+06	2.69114e+06	1.31263e+06	2.6233e+06	1.06637e+06	837769	1.59306e+06	1.18059e+07	2.08254e+07	896315	4.23663e+06	1.18041e+06
0.882_538.3024	Batrachotoxin	C31 H42 N2 O6	538.302	0.882	C13750	S10310314				level4	Venoms	Frog venoms	Alkaloids	NULL	1.1604e+07	1.17266e+07	1.10426e+07	1.2298e+07	1.18034e+07	1.14876e+07	1.16196e+07	1.18261e+07	1.19973e+07	1.09742e+07	1.19563e+07	9.65198e+06	1.3365e+07	1.13124e+07	1.25302e+07	1.66751e+07	1.22228e+07	1.01633e+07	1.3132e+07	1.00554e+07	1.29035e+07	2.72139e+07	2.63628e+07	7.21554e+06	1.40457e+07	9.86295e+06
0.883_136.0522	Phenylacetic acid	C8 H8 O2	136.052	0.883	C07086	BGI468	HMDB0000209	77.4	62.1	level2	Benzenoids	Benzene and substituted derivatives	null	map00360 Phenylalanine metabolism; map01100 Metabolic pathways;	3.20676e+06	4.57225e+06	2.76293e+06	3.03336e+06	3.32631e+06	2.50292e+06	3.46073e+06	3.1535e+06	3.37836e+06	3.27901e+06	3.33521e+06	462208	4.97306e+06	1.60007e+06	348246	579347	4.05934e+06	1.35751e+07	2.00859e+06	3.4422e+06	3.91271e+06	511896	268825	1.53212e+06	6.5555e+06	2.3979e+06
0.883_475.3073	(z)-n-[(4z,7z,10z,13z,16z,19z)-1-hydroxy-4,7,10,13,16,19-docosahexaen-1-ylidene]-l-phenylalanine	C31 H41 N O3	475.307	0.883		S59664371	HMDB0062333			level4	Organic acids and derivatives	Carboxylic acids and derivatives	Amino acids, peptides, and analogues		4.28649e+07	4.33682e+07	4.0811e+07	4.70262e+07	4.32302e+07	4.25171e+07	4.25241e+07	4.44007e+07	4.41019e+07	4.14889e+07	4.38653e+07	3.9446e+07	5.41014e+07	4.32232e+07	4.62408e+07	7.00201e+07	3.86939e+07	5.05035e+07	3.84111e+07	2.87484e+07	4.17183e+07	1.57726e+08	1.96668e+08	2.76245e+07	6.54427e+07	3.395e+07
0.888_206.0574	Scoparone	C11 H10 O4	206.057	0.888	C09311	S8110	HMDB0030818			level4	Phenylpropanoids and polyketides	Coumarins and derivatives	null	NULL	9.26822e+06	9.51424e+06	9.38412e+06	9.14763e+06	9.83253e+06	9.12693e+06	9.27696e+06	9.83967e+06	9.25147e+06	9.1458e+06	9.51239e+06	18058.6	5.4156e+07	3.3798e+06	68821.4	50390.6	1.57497e+07	5.67777e+07	2.64553e+07	1.29947e+07	2.89865e+07	46067.5	106760	2.53449e+06	1.20011e+07	1.09023e+07
0.889_270.0884	Imperatorin	C16 H14 O4	270.088	0.889	C09269	S9797	HMDB0034376			level4	Phenylpropanoids and polyketides	Coumarins and derivatives	Furanocoumarins	NULL	7.09146e+06	7.46271e+06	7.10877e+06	7.28941e+06	7.37702e+06	6.8342e+06	7.34742e+06	7.01282e+06	7.5966e+06	7.22127e+06	7.09682e+06	34355	1.73487e+07	1.18696e+06	76832.4	132328	7.84784e+06	5.46841e+07	1.89645e+07	6.80492e+06	1.20759e+07	51107.8	121460	316012	1.17573e+07	5.33641e+06
0.889_311.0787	5,9-dihydroxy-10-methoxy-11-methylfuro[2,3-c]acridin-6(11h)-one	C17 H13 N O5	311.079	0.889		S30777535	HMDB0041087			level4	Organoheterocyclic compounds	Quinolines and derivatives	Benzoquinolines		56199.6	65670.5	61835.7	55463.7	51947.2	53411.6	59724	63713.6	63569.7	49547.6	57388.7	121607	464026	413940	487526	401762	152561	137676	115207	81841.8	101752	161217	369728	81649.5	198536	379771
0.889_514.3026		C29 H42 N2 O6	514.303	0.889						level5					1.46002e+07	1.3598e+07	1.33259e+07	1.47818e+07	1.31941e+07	1.38964e+07	1.35996e+07	1.40609e+07	1.43009e+07	1.33122e+07	1.41027e+07	1.26373e+07	1.43032e+07	1.38829e+07	1.54349e+07	1.60716e+07	1.34229e+07	1.07018e+07	1.73966e+07	1.2361e+07	1.60256e+07	2.49858e+07	2.84165e+07	8.96133e+06	1.54514e+07	1.22579e+07
0.889_910.5908		C60 H74 N6 O2	910.591	0.889						level5					1.26193e+06	1.29195e+06	1.36527e+06	1.52892e+06	1.06789e+06	1.38318e+06	1.27493e+06	1.30953e+06	1.31936e+06	1.34759e+06	1.24125e+06	1.33078e+06	2.61837e+06	1.82109e+06	1.66229e+06	2.95221e+06	1.03574e+06	2.40375e+06	807623	612242	1.03037e+06	5.73263e+06	9.27024e+06	682696	2.88518e+06	1.12541e+06
0.89_451.3075		C22 H46 N O6 P	451.308	0.89						level5					7.21062e+07	6.98351e+07	7.29209e+07	7.5463e+07	7.02193e+07	7.16551e+07	7.11617e+07	7.20286e+07	7.45765e+07	6.903e+07	7.3008e+07	6.68414e+07	9.29975e+07	8.01353e+07	8.56897e+07	9.47949e+07	5.90651e+07	7.85146e+07	6.8826e+07	4.6921e+07	7.29496e+07	2.32277e+08	3.32384e+08	4.53503e+07	1.03131e+08	5.73011e+07
0.892_480.3188		C30 H44 N2 O S	480.319	0.892						level5					1.10911e+06	954194	1.07805e+06	1.23908e+06	1.13488e+06	1.04479e+06	1.08495e+06	914110	947023	1.63806e+06	973240	1.58273e+06	1.0005e+06	2.41378e+06	1.09463e+06	1.09727e+06	951787	748412	1.32146e+06	1.32901e+06	1.77407e+06	1.75531e+06	1.92799e+06	705975	1.23966e+06	868255
0.892_522.2745	(1s,16r)-7,11-dihydroxy-3-{(1e)-1-[2-(hydroxymethyl)-1,3-thiazol-4-yl]-1-propen-2-yl}-8,8,10,12,16-pentamethyl-17-oxa-4-azabicyclo[14.1.0]heptadecane-5,9-dione	C27 H42 N2 O6 S	522.274	0.892		S74888328	HMDB0127528			level4	Organoheterocyclic compounds	Azoles	Thiazoles		8.24222e+06	7.89373e+06	7.85532e+06	8.68316e+06	7.45825e+06	8.0624e+06	7.83462e+06	7.98994e+06	8.19173e+06	7.74237e+06	8.24963e+06	8.23024e+06	9.29514e+06	9.45102e+06	8.59664e+06	1.3385e+07	1.12911e+07	8.07421e+06	1.15087e+07	1.12557e+07	1.07441e+07	7.57247e+06	6.77791e+06	6.42412e+06	9.26648e+06	7.76576e+06
0.894_281.0681	2-oxo-3-(3-pyridinyl)-2h-chromen-7-yl acetate	C16 H11 N O4	281.068	0.894	C15048	S224600				level4				NULL	294567	494488	228008	473268	314579	385433	376868	324671	385619	281991	394026	217325	1.4192e+06	420541	397184	364635	350879	2.04527e+06	246847	237579	405240	296037	335976	325638	233215	326915
0.894_737.5267		C41 H76 N3 O4 P S	737.527	0.894						level5					3.35727e+06	4.3488e+06	4.32314e+06	4.57037e+06	3.87888e+06	4.21656e+06	3.36822e+06	3.93965e+06	4.3678e+06	4.0103e+06	4.1706e+06	1.69738e+06	5.75622e+06	1.46492e+07	1.49777e+06	3.40929e+06	6.265e+06	6.86696e+06	5.35093e+06	5.02133e+06	5.55813e+06	6.69203e+06	5.58744e+06	3.85248e+06	3.01141e+06	2.84784e+06
0.895_233.0682	Casimiroin	C12 H11 N O4	233.068	0.895	C10654	S110572	HMDB0033349			level4	Organoheterocyclic compounds	Quinolines and derivatives	Quinolones and derivatives	NULL	831177	1.40608e+06	1.17614e+06	1.32355e+06	1.55898e+06	917196	1.50866e+06	1.15194e+06	1.36621e+06	1.09045e+06	1.12635e+06	33016	3.05909e+06	951005	139603	117800	1.01779e+06	2.41017e+06	1.72119e+06	1.49929e+06	2.70509e+06	74377.1	194192	86825.3	2.17011e+06	866060
0.895_413.2171		C18 H40 N O3 P S2	413.217	0.895						level5					2.41841e+06	2.54028e+06	2.23499e+06	3.82599e+06	4.56012e+06	2.61323e+06	2.1426e+06	3.04653e+06	3.5458e+06	2.57955e+06	2.92277e+06	3.22096e+06	2.83879e+06	2.12572e+06	2.55791e+06	2.67565e+06	1.95782e+06	1.88368e+06	3.54826e+06	3.78334e+06	2.13485e+06	4.25337e+06	5.69131e+06	4.90807e+06	1.99979e+06	3.96515e+06
0.895_459.2794		C27 H41 N O3 S	459.279	0.895						level5					3.77438e+07	3.5316e+07	3.76389e+07	4.20171e+07	2.20477e+07	3.56649e+07	3.34142e+07	3.41134e+07	3.65481e+07	3.38911e+07	3.42214e+07	3.72906e+07	5.26896e+07	5.02903e+07	5.00318e+07	7.54026e+07	4.49743e+07	5.98301e+07	3.54091e+07	3.86545e+07	3.73734e+07	5.94712e+07	6.15962e+07	2.1563e+07	5.16885e+07	3.51846e+07
0.895_886.5911		C58 H74 N6 O2	886.591	0.895						level5					877861	442441	1.38196e+06	1.16601e+06	758224	836690	870467	773491	772367	981173	877984	1.42757e+06	1.78207e+06	1.36094e+06	1.41693e+06	1.66841e+06	698900	1.78662e+06	608900	384687	823902	4.33188e+06	6.9752e+06	620703	2.23018e+06	863657
0.897_461.2936		C30 H39 N O3	461.294	0.897						level5					1.98403e+06	2.02492e+06	1.64439e+06	959169	1.64328e+06	2.05234e+06	1.85917e+06	2.07421e+06	1.49639e+06	2.19936e+06	1.06935e+06	1.91705e+06	2.35948e+06	1.87817e+06	2.40652e+06	2.95391e+06	3.01622e+06	3.87678e+06	1.57578e+06	1.60963e+06	995370	2.69713e+06	4.9053e+06	727694	2.26766e+06	1.15054e+06
0.897_461.2963		C21 H44 N5 O2 P S	461.296	0.897						level5					1.88129e+06	1.55561e+06	2.46458e+06	2.90107e+06	2.45976e+06	1.93633e+06	2.23869e+06	1.8427e+06	2.43543e+06	1.96791e+06	2.36087e+06	2.06537e+06	3.35216e+06	2.9941e+06	4.02984e+06	4.98458e+06	2.22327e+06	4.96316e+06	2.38791e+06	2.6322e+06	3.02071e+06	5.82089e+06	7.62226e+06	1.54377e+06	4.77359e+06	3.59839e+06
0.897_504.3184	Dipyridamole	C24 H40 N8 O4	504.318	0.897		S2997	HMDB0015110			level4	Organic nitrogen compounds	Organonitrogen compounds	Amines		2.39102e+06	1.87456e+06	1.99482e+06	2.19103e+06	1.49772e+06	2.09804e+06	1.5198e+06	2.19531e+06	2.0359e+06	2.05044e+06	1.90345e+06	1.68311e+06	1.71127e+06	1.80932e+06	1.89503e+06	2.0368e+06	1.56016e+06	1.40934e+06	2.26634e+06	2.45393e+06	2.27199e+06	4.10461e+06	5.25559e+06	1.23203e+06	2.12524e+06	1.4104e+06
0.897_892.6346		C58 H80 N6 O2	892.635	0.897						level5					237490	176759	327309	198628	210299	298409	209076	303697	217299	255987	174637	280975	537298	629227	513989	473951	456853	430311	247642	172535	400969	3.97905e+06	6.10907e+06	418383	832332	425730
0.898_230.1147		C11 H18 O5	230.115	0.898						level5					1.61477e+07	1.61477e+07	1.61477e+07	1.61477e+07	1.61477e+07	1.61477e+07	1.61477e+07	1.61477e+07	1.61477e+07	1.61477e+07	1.61477e+07	2.11882e+07	1.74931e+07	1.5195e+07	2.39355e+07	1.77681e+07	8.08422e+06	1.12572e+07	9.86058e+06	7.26623e+06	1.01749e+07	1.93986e+07	2.6951e+07	1.71423e+07	1.2902e+07	2.09232e+07
0.898_457.3545		C29 H47 N O3	457.354	0.898						level5					686065	597867	702111	627773	454971	611667	625752	577510	586971	702372	580735	523481	881918	752603	911425	866440	588002	726562	611503	753147	641469	1.70712e+06	3.25363e+06	269715	724429	472695
0.898_498.2748	Simetride	C28 H38 N2 O6	498.275	0.898		S64690				level4					7.98147e+06	7.79893e+06	7.69254e+06	8.19937e+06	6.15704e+06	7.89481e+06	7.4945e+06	6.59528e+06	7.81677e+06	8.15944e+06	7.68822e+06	9.24407e+06	8.50888e+06	9.9731e+06	7.61959e+06	1.01224e+07	9.87785e+06	6.45354e+06	1.28796e+07	1.13204e+07	1.14837e+07	8.40559e+06	7.79694e+06	6.64433e+06	9.83246e+06	7.77308e+06
0.899_331.2582		C15 H33 N5 O3	331.258	0.899						level5					4.74801e+07	4.65636e+07	4.83452e+07	4.84934e+07	4.48904e+07	4.70761e+07	4.66864e+07	4.70357e+07	4.83625e+07	4.70089e+07	4.65236e+07	3.82556e+07	5.03677e+07	6.12715e+07	8.62133e+07	3.73324e+07	8.70287e+07	6.82118e+07	6.00985e+07	5.58487e+07	4.8359e+07	7.54152e+07	3.86342e+07	5.80555e+07	6.697e+07	5.27204e+07
0.901_283.0836	24ht67x53y	C16 H13 N O4	283.084	0.901		S4947061	HMDB0029282			level4	Phenylpropanoids and polyketides	Cinnamic acids and derivatives	Hydroxycinnamic acids and derivatives		1.55295e+06	1.58829e+06	1.44417e+06	1.88089e+06	1.44945e+06	1.835e+06	1.30015e+06	1.91631e+06	1.56357e+06	1.4678e+06	1.58397e+06	427367	8.53908e+06	475408	449087	472502	844037	1.46569e+07	1.28815e+06	538197	803034	412309	352748	457927	2.51473e+06	1.04861e+06
0.902_384.3011		C26 H40 O2	384.301	0.902						level5					949613	786012	633919	1.01173e+06	800042	773066	858312	746608	939816	699014	911863	438487	969717	799374	783571	449300	2.39537e+06	886044	1.74192e+06	2.66503e+06	1.65049e+06	643814	733957	1.01371e+06	807233	884184
0.903_449.2919	Onapristone	C29 H39 N O3	449.292	0.903		S4470982				level4					3.925e+06	3.7793e+06	3.78216e+06	4.06112e+06	2.96668e+06	3.85445e+06	3.61993e+06	3.35722e+06	3.89199e+06	3.66085e+06	3.91028e+06	3.01217e+06	4.60679e+06	5.00555e+06	4.28561e+06	8.36749e+06	5.06392e+06	5.96452e+06	3.3083e+06	3.5103e+06	3.33336e+06	7.53222e+06	1.54227e+07	1.79051e+06	4.37201e+06	4.49971e+06
0.904_381.1574			381.157	0.904						level5					212137	347806	327642	187528	296183	351078	339463	227122	249222	194725	417329	642902	712588	777189	752703	764299	620264	1.86598e+06	785553	691742	821416	489616	740264	524687	632877	759364
0.906_435.2795		C25 H41 N O3 S	435.279	0.906						level5					6.42072e+07	6.28509e+07	6.34117e+07	6.70083e+07	4.81545e+07	6.25107e+07	6.00395e+07	6.02938e+07	5.73903e+07	6.50367e+07	6.2133e+07	6.25117e+07	9.26443e+07	9.2123e+07	9.32539e+07	1.06827e+08	7.59283e+07	8.65182e+07	6.83432e+07	6.22817e+07	7.16231e+07	9.72086e+07	1.14357e+08	5.00135e+07	9.43717e+07	7.73057e+07
0.907_455.3394	(1s,3r,5e,7e,17xi,20s)-1,3-dihydroxy-24-(1-piperidinyl)-9,10-secochola-5,7,10-trien-24-one	C29 H45 N O3	455.339	0.907		S28529002				level4					699462	399956	525182	671071	583257	710284	600466	606057	540197	470062	670449	303963	645222	540726	274724	392926	804481	452552	238107	468643	542173	2.88844e+06	3.21511e+06	342756	703617	354158
0.908_205.0194		C10 H7 N O2 S	205.019	0.908						level5					248846	235213	261597	246410	242937	245698	246275	247651	260735	232518	248081	16019.4	20171.9	21052.5	21302.6	21932.8	17304.4	13603.3	20162.8	17581.3	14808	13740.7	19664.6	14005.8	16493.9	21615.5
0.911_139.0631	Deferiprone	C7 H9 N O2	139.063	0.911		S2866				level4					5.42974e+06	4.60247e+06	4.86711e+06	4.90621e+06	5.82897e+06	4.73993e+06	5.1263e+06	5.39747e+06	4.5887e+06	5.28441e+06	5.11065e+06	6.65969e+06	3.6652e+06	3.97657e+06	7.96239e+06	3.71528e+06	3.30444e+06	1.86616e+06	3.19281e+06	3.63398e+06	3.35248e+06	4.17542e+06	8.84418e+06	4.86045e+06	3.57539e+06	3.03829e+06
0.911_847.6547			847.655	0.911						level5					251212	178047	263794	242116	227591	228968	135617	249573	262942	248677	209183	352195	464286	460138	468265	491182	472603	370685	488148	574534	515194	2.21071e+06	6.86751e+06	428087	399151	493930
0.911_871.6559			871.656	0.911						level5					209056	209294	154660	248961	192647	200482	200300	200019	200392	204662	197283	263193	656632	294643	378697	546578	700054	187132	446388	311454	439215	1.32014e+06	5.31556e+06	268643	425149	667939
0.912_396.2267	Dinaciclib	C21 H28 N6 O2	396.227	0.912		S25027387				level4					1.65256e+06	2.22136e+06	2.19341e+06	2.12459e+06	2.13696e+06	1.42719e+06	2.30911e+06	1.0601e+06	2.82626e+06	1.80801e+06	2.57563e+06	1.39568e+06	2.26158e+06	1.82693e+06	2.13326e+06	1.16658e+06	3.8117e+06	1.23477e+06	7.7484e+06	7.96578e+06	4.69799e+06	596756	897197	1.74145e+06	1.53728e+06	2.84636e+06
0.915_424.2271	Licoricidin	C26 H32 O5	424.227	0.915	C16986	S421908	HMDB0034183			level4	PK Polyketides	PK12 Flavonoids	PK1208 Isoflavans	NULL	5.48068e+06	5.16268e+06	5.77469e+06	6.26004e+06	3.85886e+06	5.20443e+06	5.15515e+06	5.25009e+06	5.52245e+06	5.18948e+06	5.17191e+06	4.26692e+06	5.09782e+06	4.91486e+06	5.74012e+06	4.87614e+06	8.46068e+06	2.91868e+06	1.55037e+07	1.46429e+07	9.16388e+06	3.7129e+06	4.41943e+06	4.4167e+06	4.11636e+06	5.34641e+06
0.915_431.3394	Peimine	C27 H45 N O3	431.339	0.915	C10830	S116523				level4	Alkaloids	Alkaloids derived by amination reactions	Steroid alkaloids	NULL	9.20883e+06	9.20883e+06	9.20883e+06	9.20883e+06	9.20883e+06	9.20883e+06	9.20883e+06	9.20883e+06	9.20883e+06	9.20883e+06	9.20883e+06	1.04472e+07	1.31161e+07	2.39633e+07	1.43853e+07	1.40446e+07	1.03076e+07	1.29879e+07	1.9208e+07	1.04616e+07	2.14995e+07	6.1668e+07	6.13095e+07	1.18325e+07	2.38359e+07	7.6591e+06
0.915_466.2738	[similar to: docosahexaenoic acid; δmass: 138.0335 da]		466.274	0.915						level5					5.36085e+06	5.36085e+06	5.36085e+06	5.36085e+06	5.36085e+06	5.36085e+06	5.36085e+06	5.36085e+06	5.36085e+06	5.36085e+06	5.36085e+06	5.63447e+06	4.39598e+06	9.7176e+06	7.59685e+06	4.66435e+06	8.01965e+06	4.02321e+06	2.88968e+07	1.97541e+07	1.59633e+07	4.00206e+06	7.38245e+06	7.34862e+06	5.94153e+06	5.89268e+06
0.915_868.6348			868.635	0.915						level5					253953	339697	262769	239406	223393	259562	240133	280120	218201	358548	226627	366489	405315	432486	428305	438209	408732	439150	474945	477865	431523	4.38909e+06	6.28916e+06	405217	1.17075e+06	433389
0.916_183.0527	4-pyridoxate	C8 H9 N O4	183.053	0.916	C00847	BGI126	HMDB0000017	96.8	92.7	level1	Organoheterocyclic compounds	Pyridines and derivatives	Pyridinecarboxylic acids and derivatives	map00750 Vitamin B6 metabolism; map01100 Metabolic pathways;	8.37912e+07	7.82685e+07	7.84273e+07	8.19427e+07	8.50353e+07	8.13704e+07	7.99794e+07	8.1916e+07	7.58896e+07	8.67584e+07	8.15628e+07	1.12861e+08	5.49897e+07	5.43477e+07	1.20955e+08	6.2251e+07	4.48323e+07	3.57248e+07	4.75893e+07	5.30802e+07	4.75345e+07	7.54237e+07	1.30162e+08	7.81965e+07	5.49184e+07	4.52468e+07
0.917_358.2863	1-phenyl-1,3-octadecanedione	C24 H38 O2	358.286	0.917		S78501	HMDB0035583			level4	Organic oxygen compounds	Organooxygen compounds	Carbonyl compounds		2.22037e+07	2.21728e+07	2.30109e+07	2.22995e+07	2.23023e+07	2.23386e+07	2.23884e+07	2.23473e+07	2.21162e+07	2.31639e+07	2.19506e+07	1.26621e+07	3.19438e+07	1.83104e+07	2.17017e+07	1.54353e+07	2.26013e+07	2.70381e+07	4.91999e+07	5.55789e+07	4.46393e+07	2.75847e+07	2.47909e+07	3.01872e+07	3.66364e+07	3.29636e+07
0.917_441.3231		C22 H44 N5 O2 P	441.323	0.917						level5					1.98403e+07	1.97934e+07	1.87487e+07	2.01875e+07	1.32966e+07	1.90855e+07	1.73349e+07	1.83332e+07	1.84758e+07	1.95755e+07	1.75184e+07	1.4377e+07	2.54055e+07	1.69422e+07	2.19339e+07	2.38545e+07	1.62265e+07	2.1051e+07	1.6089e+07	1.54582e+07	1.86764e+07	7.14042e+07	8.95348e+07	1.38657e+07	2.62854e+07	1.74457e+07
0.918_364.2159		C18 H29 Cl N6	364.216	0.918						level5					7.24585e+06	6.50069e+06	7.58378e+06	7.00155e+06	7.02963e+06	7.04733e+06	7.05988e+06	7.08882e+06	6.99783e+06	7.11531e+06	7.04839e+06	3.58946e+06	7.00791e+06	6.66981e+06	7.73554e+06	8.55154e+06	1.1728e+07	4.9624e+06	1.69597e+07	1.46249e+07	1.0261e+07	4.46785e+06	4.07903e+06	5.74896e+06	5.0676e+06	9.83177e+06
0.919_852.608		C44 H91 N2 O7 P3	852.608	0.919						level5					370505	370505	370505	370505	370505	370505	370505	370505	370505	370505	370505	415754	566599	514475	452453	682027	506086	418320	195191	375451	182031	2.21696e+06	2.27369e+06	433153	175523	579834
0.92_433.2636	Ulipristal	C28 H35 N O3	433.264	0.92		S19349271			57.9	level4					3.03083e+06	3.42127e+06	2.94722e+06	3.05501e+06	2.59633e+06	3.0088e+06	2.99071e+06	3.11227e+06	2.74491e+06	3.5597e+06	2.7372e+06	3.11244e+06	3.04508e+06	4.21252e+06	3.68404e+06	6.51469e+06	4.6799e+06	5.15377e+06	2.70694e+06	4.11279e+06	2.83136e+06	2.07613e+06	3.67091e+06	1.36554e+06	2.26959e+06	3.73981e+06
0.92_443.3402		C28 H45 N O3	443.34	0.92						level5					1.42715e+06	974254	585558	1.56011e+06	968639	918268	1.04388e+06	904840	1.15778e+06	1.01228e+06	1.07972e+06	576263	1.23826e+06	860880	1.50326e+06	1.12057e+06	699358	1.37814e+06	669297	504907	989962	5.1842e+06	4.14581e+06	384837	1.84676e+06	870179
0.921_374.2453	Digitoxigenin	C23 H34 O4	374.245	0.921		S3571902				level4					5.19835e+06	5.05275e+06	4.9285e+06	4.85525e+06	5.34771e+06	5.23809e+06	4.51138e+06	4.61809e+06	5.61928e+06	6.28792e+06	4.21671e+06	4.78006e+06	7.61812e+06	5.55636e+06	7.34169e+06	7.82731e+06	6.61636e+06	5.98542e+06	7.6468e+06	6.90077e+06	7.80267e+06	6.05225e+06	7.34652e+06	5.70595e+06	7.40439e+06	7.99685e+06
0.922_330.2459			330.246	0.922						level5					8.99381e+07	9.7411e+07	8.70298e+07	8.96268e+07	9.11849e+07	9.06627e+07	9.0712e+07	9.30259e+07	9.02376e+07	8.96147e+07	9.16592e+07	7.72867e+07	1.08103e+08	1.05525e+08	1.13263e+08	1.20114e+08	1.22854e+08	9.67634e+07	1.2675e+08	1.27318e+08	1.1168e+08	8.84856e+07	1.04692e+08	1.06248e+08	9.57059e+07	1.13454e+08
0.922_429.3232	Peiminine	C27 H43 N O3	429.323	0.922	C10808	S146697				level4	Alkaloids	Alkaloids derived by amination reactions	Steroid alkaloids	NULL	4.471e+07	5.11697e+07	4.57588e+07	4.84607e+07	4.5193e+07	4.45838e+07	4.48854e+07	4.98088e+07	4.63649e+07	4.91844e+07	4.38921e+07	3.35925e+07	4.93941e+07	6.26479e+07	5.30531e+07	6.49927e+07	5.82942e+07	5.78921e+07	4.43685e+07	5.35721e+07	4.57318e+07	7.17171e+07	1.18525e+08	2.18428e+07	4.61254e+07	4.49723e+07
0.922_686.5272		C47 H66 N4	686.527	0.922						level5					1.32274e+06	1.42659e+06	1.54108e+06	1.86993e+06	1.09786e+06	1.49903e+06	1.18057e+06	1.47345e+06	1.34667e+06	1.69075e+06	1.3485e+06	954201	2.0525e+06	601295	1.30868e+06	876696	4.58175e+06	2.46191e+06	1.42439e+06	3.53042e+06	2.91623e+06	1.35904e+06	915838	2.9581e+06	3.04248e+06	2.9476e+06
0.924_284.2494		C21 H32	284.249	0.924						level5					3.53724e+08	3.00649e+08	3.50947e+08	3.47748e+08	3.28572e+08	3.3637e+08	3.34729e+08	3.25754e+08	3.76984e+08	3.14231e+08	3.29833e+08	2.68297e+08	4.13444e+08	6.20554e+08	5.47376e+08	2.91769e+08	1.02483e+09	3.65242e+08	2.67238e+08	4.3465e+08	4.79021e+08	4.37331e+08	2.62819e+08	3.63318e+08	6.06005e+08	8.07127e+08
0.924_415.3115		C23 H45 N O3 S	415.312	0.924						level5					1.25736e+07	1.38697e+07	1.30963e+07	1.33702e+07	1.2146e+07	1.26454e+07	1.31098e+07	1.29013e+07	1.33394e+07	1.43845e+07	1.15662e+07	1.52389e+07	1.09056e+07	2.94641e+07	1.61911e+07	2.45469e+07	1.95757e+07	1.57184e+07	1.31753e+07	1.69055e+07	1.79999e+07	4.20108e+07	3.62961e+07	1.24935e+07	2.38582e+07	1.64417e+07
0.924_840.6074		C40 H85 N6 O10 P	840.607	0.924						level5					1.13695e+06	1.23303e+06	1.27097e+06	1.07681e+06	681923	1.12759e+06	1.0235e+06	1.40333e+06	1.01782e+06	941968	1.04998e+06	605290	1.78679e+06	2.00479e+06	1.75596e+06	2.34838e+06	1.24108e+06	1.43327e+06	718721	861035	1.31444e+06	2.7857e+06	6.64418e+06	294480	1.23515e+06	896025
0.925_308.2709	Ethyl linoleate	C20 H36 O2	308.271	0.925		S4445379				level4					4.34839e+07	3.49732e+07	3.53597e+07	4.72359e+07	3.54912e+07	3.87618e+07	3.01563e+07	4.58242e+07	3.55503e+07	3.69401e+07	4.28442e+07	2.83462e+07	4.3765e+07	4.00521e+07	4.46052e+07	3.40763e+07	7.12781e+07	5.10371e+07	6.54548e+07	8.78773e+07	6.10188e+07	2.30829e+07	1.98481e+07	4.78785e+07	4.42779e+07	6.21013e+07
0.925_678.4635		C39 H62 N6 O2 S	678.463	0.925						level5					4.64294e+06	5.13648e+06	5.37229e+06	5.2332e+06	4.13688e+06	4.99309e+06	4.68341e+06	4.87332e+06	4.47627e+06	5.16026e+06	5.14981e+06	3.7708e+06	6.64809e+06	5.05211e+06	6.8432e+06	5.24605e+06	9.54408e+06	3.48599e+06	9.52593e+06	1.11784e+07	8.34597e+06	1.91385e+06	1.16617e+06	5.88871e+06	4.59107e+06	7.9438e+06
0.925_684.5132		C46 H68 O4	684.513	0.925						level5					4.8455e+06	4.19619e+06	3.70856e+06	5.20177e+06	4.31448e+06	4.35369e+06	3.76828e+06	5.03755e+06	4.2246e+06	4.66539e+06	4.15721e+06	3.22194e+06	5.09157e+06	3.42947e+06	5.02851e+06	3.24644e+06	1.09762e+07	4.09104e+06	6.34338e+06	1.06012e+07	7.44032e+06	2.72181e+06	2.32222e+06	8.18956e+06	6.5784e+06	8.29649e+06
0.928_360.302	5beta-cholanoic acid	C24 H40 O2	360.302	0.928	C19642	S83775				level4				NULL	5.52756e+06	5.52756e+06	5.52756e+06	5.52756e+06	5.52756e+06	5.52756e+06	5.52756e+06	5.52756e+06	5.52756e+06	5.52756e+06	5.52756e+06	3.42971e+06	7.15058e+06	3.956e+06	5.25634e+06	3.72328e+06	1.51996e+07	5.12172e+06	1.54474e+07	1.33484e+07	1.47726e+07	7.33307e+06	1.05416e+07	4.9981e+06	7.71437e+06	5.73906e+06
0.928_413.2954		C23 H43 N O3 S	413.295	0.928						level5					5.63397e+07	6.38411e+07	5.96501e+07	5.88254e+07	6.15503e+07	5.73418e+07	5.82315e+07	6.39437e+07	5.72416e+07	6.11601e+07	5.83713e+07	4.64948e+07	7.41829e+07	9.58872e+07	8.08638e+07	1.04926e+08	9.80722e+07	7.9816e+07	5.7279e+07	8.25534e+07	6.06865e+07	4.8021e+07	7.41466e+07	3.17512e+07	6.34877e+07	6.20779e+07
0.928_427.31			427.31	0.928						level5					435402	504887	579419	424170	470837	480703	480758	471913	524867	430252	497414	305583	301729	365724	296734	299418	156055	435412	320084	373244	420233	2.05646e+06	5.21875e+06	243282	629253	146495
0.93_342.2563	2475675	C23 H34 O2	342.256	0.93		S4908583				level4					4.23255e+06	4.21849e+06	4.4305e+06	4.18046e+06	4.33058e+06	4.3108e+06	3.55944e+06	4.84718e+06	4.25157e+06	4.31245e+06	4.09971e+06	3.27929e+06	6.24427e+06	3.77586e+06	4.98009e+06	3.59008e+06	1.00417e+07	5.14464e+06	7.05068e+06	9.46072e+06	6.93257e+06	2.47772e+06	2.46431e+06	9.32194e+06	5.47924e+06	8.1598e+06
0.93_417.3232	N-oleoyl dopamine	C26 H43 N O3	417.323	0.93	C12272	MReference-4432			54	level3				map04080 Neuroactive ligand-receptor interaction;	3.26121e+07	3.50758e+07	3.38023e+07	3.53492e+07	3.45436e+07	3.24475e+07	3.1693e+07	3.96395e+07	3.15349e+07	3.36094e+07	3.39658e+07	3.13701e+07	4.1201e+07	3.49131e+07	3.53806e+07	4.16052e+07	2.91848e+07	2.97467e+07	3.20327e+07	2.53349e+07	3.21686e+07	9.4784e+07	1.76902e+08	2.01728e+07	4.28315e+07	2.56963e+07
0.931_357.0842		C18 H15 N O7	357.084	0.931						level5					279987	268964	271024	286708	269525	272466	274217	272146	285480	271357	271970	249337	433878	321394	336760	323978	342734	283703	392122	410299	354822	308324	368481	300981	312547	377503
0.932_356.2706	Ethyl docosahexaenoate	C24 H36 O2	356.271	0.932	C16185	S8007148				level4	FA Fatty acyls	FA04 Docosanoids	Null	NULL	3.58919e+07	3.62788e+07	3.49844e+07	3.68773e+07	3.56153e+07	3.59176e+07	3.59218e+07	3.59566e+07	3.56661e+07	3.631e+07	3.5766e+07	2.14896e+07	4.55359e+07	3.18094e+07	3.43301e+07	2.77154e+07	1.75764e+07	3.78472e+07	6.3527e+07	8.45797e+07	5.73377e+07	2.7992e+07	2.04924e+07	4.78691e+07	4.60697e+07	5.80227e+07
0.933_661.5147			661.515	0.933						level5					1.86181e+06	1.87676e+06	2.93757e+06	2.02033e+06	1.93233e+06	2.02418e+06	2.07317e+06	2.03107e+06	2.86068e+06	1.55717e+06	2.11551e+06	1.22485e+06	2.1606e+06	2.07415e+06	2.79484e+06	2.44605e+06	4.88214e+06	3.81228e+06	3.24344e+06	3.57616e+06	3.21967e+06	2.47319e+06	1.78417e+06	2.65992e+06	3.2095e+06	4.11839e+06
0.934_294.0885	Mfcd00092248	C18 H14 O4	294.089	0.934		S235753	HMDB0029364			level4	Phenylpropanoids and polyketides	Isoflavonoids	Isoflav-2-enes		281789	276094	273356	289478	272393	276380	277854	275518	289007	274739	275398	252202	439808	305372	304980	328567	371577	287469	397029	433075	417419	312750	373209	305090	316504	382714
0.935_326.2237	Promegestone	C22 H30 O2	326.224	0.935	C14208	S33716				level4				NULL	1.62946e+07	1.74138e+07	1.79863e+07	1.87242e+07	1.77779e+07	1.54529e+07	1.72454e+07	1.73095e+07	1.9424e+07	1.58082e+07	1.76855e+07	1.40681e+07	1.79088e+07	1.71334e+07	2.22438e+07	2.10102e+07	1.94445e+07	2.38076e+07	2.5749e+07	2.23127e+07	2.0742e+07	1.3681e+07	1.80604e+07	1.63403e+07	1.77657e+07	1.95669e+07
0.935_427.3075		C27 H41 N O3	427.308	0.935						level5					5.64522e+07	5.55498e+07	5.96654e+07	5.5758e+07	5.63397e+07	5.67232e+07	5.66514e+07	5.68704e+07	5.64173e+07	5.76554e+07	5.60729e+07	4.28771e+07	7.94778e+07	5.34906e+07	5.05172e+07	6.55809e+07	6.50804e+07	5.30872e+07	5.57161e+07	6.30152e+07	6.08792e+07	1.59237e+08	2.2092e+08	3.98191e+07	7.69418e+07	5.64317e+07
0.938_411.283		C20 H37 N5 O4	411.283	0.938						level5					242399	237184	234538	248077	233154	234927	235225	229038	278284	226767	227024	204436	802159	336682	259298	279150	299783	245123	328206	358569	347738	983302	1.55219e+06	259968	337267	324905
0.938_660.5116		C45 H64 N4	660.512	0.938						level5					4.66592e+06	4.79722e+06	6.23113e+06	5.13479e+06	5.27594e+06	5.14958e+06	4.36041e+06	5.88891e+06	4.90607e+06	5.32716e+06	5.03319e+06	4.07555e+06	7.78714e+06	4.38848e+06	9.18081e+06	6.76572e+06	1.38022e+07	9.26794e+06	1.08371e+07	1.15103e+07	6.88901e+06	8.06135e+06	6.27351e+06	7.64163e+06	9.08967e+06	9.28088e+06
0.938_830.618		C44 H88 N4 O6 P2	830.618	0.938						level5					1.64086e+06	1.64086e+06	1.64086e+06	1.64086e+06	1.64086e+06	1.64086e+06	1.64086e+06	1.64086e+06	1.64086e+06	1.64086e+06	1.64086e+06	1.33515e+06	2.15322e+06	4.68794e+06	2.66388e+06	2.85564e+06	1.10365e+06	1.69677e+06	648176	802773	1.33234e+06	1.62036e+07	1.65714e+07	736595	2.80182e+06	1.02318e+06
0.941_685.5162			685.516	0.941						level5					2.59614e+06	2.25355e+06	1.87701e+06	2.60486e+06	1.98562e+06	2.27856e+06	1.76428e+06	2.74493e+06	1.82624e+06	2.70158e+06	2.13011e+06	1.45034e+06	3.1233e+06	1.64163e+06	2.21038e+06	1.57882e+06	5.9235e+06	3.05867e+06	3.54682e+06	5.65403e+06	4.15335e+06	1.81442e+06	1.3625e+06	4.26722e+06	4.05191e+06	4.29083e+06
0.942_331.2791			331.279	0.942						level5					2.0696e+07	2.26224e+07	2.16243e+07	2.0576e+07	2.31681e+07	2.22686e+07	1.78703e+07	2.76783e+07	1.72141e+07	2.74929e+07	1.88128e+07	2.48434e+07	2.21976e+07	1.63762e+07	2.20501e+07	1.84929e+07	3.15162e+07	2.70078e+07	3.63258e+07	5.28696e+07	5.62343e+07	2.80706e+07	2.42709e+07	2.42364e+07	4.06227e+07	2.65631e+07
0.942_332.2704	(7e,10e,13e,16e)-7,10,13,16-docosatetraenoic acid	C22 H36 O2	332.27	0.942		S4445971				level4					1.10474e+08	1.23395e+08	1.13476e+08	1.12609e+08	1.24824e+08	8.66455e+07	1.19422e+08	1.19876e+08	1.13944e+08	1.129e+08	1.13891e+08	7.97154e+07	1.5455e+08	1.06943e+08	1.36716e+08	1.04548e+08	2.14555e+08	1.64141e+08	2.33627e+08	2.07161e+08	2.40574e+08	1.56642e+08	1.66854e+08	1.22606e+08	1.74674e+08	1.5595e+08
0.943_318.254		C17 H30 N6	318.254	0.943						level5					899330	899330	899330	899330	899330	899330	899330	899330	899330	899330	899330	2.30488e+06	546634	1.04659e+06	834893	848494	1.63351e+06	1.30367e+06	1.69666e+06	2.03229e+06	1.47138e+06	1.36863e+06	1.29893e+06	1.02821e+06	1.80653e+06	1.35668e+06
0.944_814.5905		C47 H85 N4 O P3	814.591	0.944						level5					2.69629e+06	2.32005e+06	3.04243e+06	2.3043e+06	2.82762e+06	2.58034e+06	2.59408e+06	2.64964e+06	2.84163e+06	2.45786e+06	2.56442e+06	1.56176e+06	4.75896e+06	3.73553e+06	2.26357e+06	5.31714e+06	3.33719e+06	2.38932e+06	1.24405e+06	1.95525e+06	2.4957e+06	9.40602e+06	1.31463e+07	341495	2.97032e+06	1.70283e+06
0.945_632.4805		C42 H64 O4	632.481	0.945						level5					6.9541e+07	6.9541e+07	6.9541e+07	6.9541e+07	6.9541e+07	6.9541e+07	6.9541e+07	6.9541e+07	6.9541e+07	6.9541e+07	6.9541e+07	6.9838e+07	1.26685e+08	7.04292e+07	8.64358e+07	1.22636e+08	8.39791e+07	8.67606e+07	8.47315e+07	9.33929e+07	8.9837e+07	6.91523e+07	7.4883e+07	9.05102e+07	9.71118e+07	1.02155e+08
0.946_411.2796		C17 H42 N5 O2 P S	411.28	0.946						level5					6.65354e+07	6.5317e+07	6.51058e+07	6.5011e+07	6.80689e+07	6.5467e+07	6.58339e+07	6.64334e+07	6.7032e+07	6.47273e+07	6.57978e+07	5.42377e+07	1.02031e+08	7.77511e+07	6.84434e+07	9.10919e+07	9.79336e+07	6.90356e+07	7.1866e+07	9.46056e+07	8.36677e+07	1.31075e+08	1.37212e+08	5.55463e+07	9.76012e+07	7.50776e+07
0.946_419.3398		C26 H45 N O3	419.34	0.946						level5					3.66461e+06	2.80121e+06	2.62675e+06	2.31225e+06	2.12028e+06	2.49769e+06	3.09593e+06	2.44702e+06	3.13878e+06	2.77757e+06	2.33637e+06	2.7233e+06	3.16924e+06	2.21142e+06	3.28948e+06	2.75152e+06	1.87171e+06	2.24417e+06	2.42722e+06	1.61899e+06	1.83826e+06	6.2524e+06	4.07191e+06	498867	1.23409e+06	1.66344e+06
0.947_435.2433		C24 H37 N O4 S	435.243	0.947						level5					360975	351970	346838	365606	342448	328170	365171	334652	358349	354526	356408	444980	546372	479013	534116	531867	539207	320692	694986	703808	611821	468305	546036	444560	517531	565756
0.948_425.2916	Jervine	C27 H39 N O3	425.292	0.948	C10811	S9694				level4	Alkaloids	Alkaloids derived by amination reactions	Steroid alkaloids		2.21586e+06	2.6527e+06	2.45181e+06	2.37818e+06	3.25016e+06	2.41014e+06	2.73221e+06	2.82683e+06	2.3998e+06	2.80848e+06	2.19071e+06	1.33109e+06	3.43991e+06	2.02388e+06	1.40788e+06	2.18516e+06	4.29478e+06	2.41553e+06	3.66067e+06	3.89583e+06	4.2453e+06	8.83496e+06	8.01549e+06	1.47622e+06	6.3648e+06	2.81122e+06
0.948_804.6047		C42 H86 N4 O6 P2	804.605	0.948						level5					467466	467466	467466	467466	467466	467466	467466	467466	467466	467466	467466	616774	1.58822e+06	618113	866291	894506	771777	582307	752090	734711	648553	1.59591e+06	4.08748e+06	611647	600532	831572
0.949_790.5908		C48 H89 P3 S	790.591	0.949						level5					1.40683e+06	1.43324e+06	1.21459e+06	1.6465e+06	1.3134e+06	1.39462e+06	1.39563e+06	1.39687e+06	1.44613e+06	1.30103e+06	1.4439e+06	430219	2.8956e+06	2.37348e+06	2.58345e+06	5.08314e+06	1.76701e+06	2.27955e+06	625838	861024	876348	7.53147e+06	4.72907e+06	286107	1.91643e+06	550243
0.95_403.3076	N-palmitoyl-l-phenylalanine	C25 H41 N O3	403.308	0.95		S157912	HMDB0062339			level4	Organic acids and derivatives	Carboxylic acids and derivatives	Amino acids, peptides, and analogues		1.13926e+08	1.16288e+08	1.14962e+08	1.14189e+08	1.15135e+08	1.1479e+08	1.14932e+08	1.15097e+08	1.15803e+08	1.12222e+08	1.16474e+08	9.81493e+07	1.37696e+08	1.50582e+08	1.21803e+08	1.67491e+08	1.20688e+08	1.19846e+08	1.15767e+08	1.1555e+08	1.21552e+08	3.14362e+08	3.59843e+08	8.33303e+07	1.46276e+08	1.1334e+08
0.953_397.3549	N-docosanoylglycine	C24 H47 N O3	397.355	0.953		S15487852	HMDB0013219			level4	Organic acids and derivatives	Carboxylic acids and derivatives	Amino acids, peptides, and analogues		5.32169e+06	7.00213e+06	6.9894e+06	5.93919e+06	5.00421e+06	5.17519e+06	6.02805e+06	6.39309e+06	6.43812e+06	5.07601e+06	6.19632e+06	5.89604e+06	7.60288e+06	8.12821e+06	5.17535e+06	7.30591e+06	5.16333e+06	5.05653e+06	5.65059e+06	5.27273e+06	7.97135e+06	1.88086e+07	2.29253e+07	3.62785e+06	7.58361e+06	5.80698e+06
0.953_636.512		C43 H64 N4	636.512	0.953						level5					7.937e+06	8.67317e+06	8.02628e+06	8.41246e+06	8.78753e+06	7.04492e+06	8.49262e+06	8.07001e+06	7.22346e+06	9.3365e+06	8.48759e+06	6.40886e+06	1.1646e+07	7.56266e+06	9.73047e+06	8.61018e+06	1.35568e+07	1.20147e+07	1.55089e+07	1.59574e+07	1.41797e+07	8.06664e+06	9.40505e+06	8.88169e+06	1.07763e+07	1.25317e+07
0.953_796.6353		C43 H85 N6 O5 P	796.635	0.953						level5					647545	616524	733688	668199	710567	584106	666278	670512	645884	685426	670975	677761	862582	764750	781778	772635	803762	680063	1.0442e+06	1.02281e+06	887588	3.71322e+06	6.47206e+06	725804	901909	819879
0.958_415.3091	Myxalamid a	C26 H41 N O3	415.309	0.958	C12158	S10128295				level4				NULL	5.48419e+06	4.59932e+06	4.49185e+06	7.12484e+06	4.68825e+06	4.2188e+06	5.13546e+06	4.80656e+06	8.35463e+06	3.67697e+06	4.8138e+06	4.88322e+06	1.0371e+07	7.59468e+06	4.18001e+06	1.34851e+07	2.78396e+06	5.92158e+06	5.07616e+06	4.75709e+06	6.53278e+06	2.77426e+07	2.57704e+07	3.18492e+06	2.13138e+07	8.34861e+06
0.959_405.3236	Minaxolone	C25 H43 N O3	405.324	0.959		S64967				level4					1.21347e+06	1.00727e+06	1.05445e+06	719671	507454	806973	1.05939e+06	668989	1.00752e+06	867346	916858	1.73752e+06	1.43644e+06	1.31268e+06	1.23705e+06	691198	1.18504e+06	876059	536989	1.48818e+06	934604	2.89693e+06	4.89285e+06	768570	982263	793548
0.959_637.5164			637.516	0.959						level5					2.18837e+06	3.13856e+06	3.1055e+06	3.30969e+06	3.55134e+06	2.44147e+06	2.96211e+06	3.01637e+06	2.24335e+06	3.70717e+06	3.01806e+06	2.55468e+06	4.13642e+06	2.4525e+06	3.06994e+06	2.76707e+06	4.93831e+06	4.53457e+06	5.47111e+06	6.58773e+06	5.24689e+06	2.46531e+06	2.7518e+06	3.44703e+06	4.41186e+06	3.9579e+06
0.961_329.2638	[similar to: docosahexaenoic acid; δmass: 1.0235 da]		329.264	0.961						level5					5.82306e+07	5.04063e+07	9.3221e+07	5.33132e+07	5.58039e+07	6.06238e+07	6.05782e+07	6.05121e+07	6.06452e+07	6.17696e+07	5.94438e+07	4.84809e+07	7.21534e+07	6.70818e+07	7.96234e+07	9.01461e+07	7.65114e+07	8.16525e+07	7.53987e+07	2.39024e+08	7.56679e+07	7.45362e+07	6.49711e+07	5.71795e+07	5.72946e+07	4.2203e+07
0.961_496.2203		C23 H38 N4 O2 P2 S	496.22	0.961						level5					361529	368722	353307	369569	361165	362791	362809	362940	361748	364342	362210	339449	462277	415183	476942	482795	447906	349709	537118	585042	466257	437212	401904	382655	378057	489427
0.961_634.4962		C34 H70 N2 O6 S	634.496	0.961						level5					2.06173e+07	2.05914e+07	2.2155e+07	2.07873e+07	2.04456e+07	2.09069e+07	2.09321e+07	2.124e+07	1.96335e+07	2.18917e+07	2.0939e+07	1.73526e+07	2.51885e+07	2.00631e+07	2.94565e+07	2.86703e+07	2.93978e+07	3.05034e+07	2.51825e+07	3.36783e+07	2.58104e+07	1.89324e+07	2.21066e+07	1.79519e+07	2.24859e+07	3.20895e+07
0.962_387.2797		C21 H41 N O3 S	387.28	0.962						level5					9.1739e+07	9.32439e+07	9.49047e+07	9.4889e+07	1.00092e+08	8.45763e+07	9.57109e+07	9.65888e+07	9.45227e+07	9.03414e+07	9.57519e+07	9.02427e+07	1.29774e+08	1.4312e+08	1.0727e+08	1.68423e+08	1.39281e+08	1.14065e+08	1.13542e+08	1.26364e+08	1.23307e+08	1.26657e+08	1.31289e+08	7.98554e+07	1.41761e+08	1.08049e+08
0.962_409.2637		C17 H40 N5 O2 P S	409.264	0.962						level5					2.61317e+06	2.29219e+06	2.50838e+06	2.57394e+06	3.02498e+06	2.43969e+06	2.68048e+06	3.00898e+06	2.26237e+06	2.63166e+06	2.47941e+06	2.10197e+06	3.32932e+06	2.52334e+06	1.54887e+06	3.07854e+06	6.50736e+06	3.8784e+06	3.83203e+06	5.62638e+06	4.07694e+06	3.94434e+06	2.47705e+06	2.45272e+06	5.91364e+06	3.72695e+06
0.963_403.1413		C24 H21 N O5	403.141	0.963						level5					608774	615143	639878	604060	650232	552651	636280	625638	597814	632667	617620	584118	758608	696388	735462	738837	768767	606580	979488	949264	830390	686338	748235	654303	705855	786161
0.963_630.4631		C35 H62 N6 O2 S	630.463	0.963						level5					3.65644e+06	3.86019e+06	4.31162e+06	3.24739e+06	4.06351e+06	3.36948e+06	3.93739e+06	3.71032e+06	3.28003e+06	3.94029e+06	4.18339e+06	3.25021e+06	5.13601e+06	3.9447e+06	4.69307e+06	3.97511e+06	4.93444e+06	2.78435e+06	7.90222e+06	6.79509e+06	4.52011e+06	1.94851e+06	1.25564e+06	3.20563e+06	2.93743e+06	4.88675e+06
0.964_232.1306		C11 H20 O5	232.131	0.964						level5					3.84375e+06	3.66409e+06	3.59085e+06	3.82626e+06	3.68511e+06	3.81121e+06	3.61396e+06	3.32341e+06	4.30854e+06	3.57345e+06	3.7461e+06	4.15496e+06	3.57785e+06	2.47403e+06	4.58863e+06	2.90171e+06	1.87819e+06	2.18515e+06	2.50577e+06	1.71057e+06	2.12387e+06	5.78663e+06	1.28876e+07	2.66987e+06	2.5581e+06	4.3215e+06
0.964_395.3389		C24 H45 N O3	395.339	0.964						level5					2.57141e+07	2.60864e+07	2.5883e+07	2.64074e+07	2.84334e+07	2.3446e+07	2.62256e+07	2.86972e+07	2.58058e+07	2.54854e+07	2.57815e+07	2.17557e+07	2.84289e+07	3.4024e+07	3.05629e+07	4.37015e+07	3.19443e+07	3.01885e+07	2.27132e+07	2.79851e+07	2.62182e+07	4.41879e+07	2.34328e+07	1.0946e+07	2.67743e+07	2.44094e+07
0.965_400.2269	Deprodone propionate (jan)	C24 H32 O5	400.227	0.965		S392019				level4					4.56676e+06	3.81392e+06	4.74979e+06	4.39169e+06	4.55573e+06	4.31056e+06	4.35102e+06	4.51115e+06	4.64191e+06	3.96615e+06	4.52473e+06	3.11987e+06	4.85586e+06	3.91397e+06	4.07214e+06	3.63469e+06	5.87288e+06	2.2795e+06	1.03509e+07	1.03579e+07	7.0067e+06	3.42654e+06	3.02608e+06	3.47003e+06	2.98484e+06	5.75915e+06
0.966_383.339		C23 H45 N O3	383.339	0.966						level5					5.09915e+06	5.36347e+06	4.81507e+06	4.89745e+06	5.40001e+06	4.43098e+06	5.20465e+06	4.96539e+06	5.35699e+06	4.92393e+06	5.03587e+06	5.01352e+06	8.19861e+06	6.13901e+06	4.73176e+06	7.21433e+06	5.41812e+06	4.94923e+06	5.1656e+06	4.5858e+06	5.76583e+06	1.81728e+07	2.07223e+07	3.64494e+06	9.13895e+06	4.85877e+06
0.966_614.5276		C41 H66 N4	614.528	0.966						level5					4.11038e+06	4.29729e+06	4.21543e+06	4.08339e+06	4.2191e+06	4.17946e+06	4.1881e+06	4.19929e+06	4.14729e+06	4.18028e+06	4.20863e+06	4.51713e+06	5.91017e+06	5.91058e+06	8.77989e+06	4.97057e+06	6.05689e+06	6.10126e+06	4.65638e+06	7.24037e+06	5.37447e+06	3.90306e+06	4.06962e+06	6.34725e+06	4.77087e+06	6.1053e+06
0.967_411.2433		C16 H38 N5 O3 P S	411.243	0.967						level5					341975	397481	391347	358211	382826	328318	376062	373976	358626	379999	371416	366947	410082	423333	438413	436219	453965	373351	584080	568776	495770	410800	432345	400163	419900	452531
0.967_635.4999			635.5	0.967						level5					1.28454e+07	1.21109e+07	1.26796e+07	1.27767e+07	1.28661e+07	1.05756e+07	1.26383e+07	1.28962e+07	1.07378e+07	1.30387e+07	1.3644e+07	1.02981e+07	1.42263e+07	1.20254e+07	1.59872e+07	1.41047e+07	1.73311e+07	1.71417e+07	1.86234e+07	1.91343e+07	1.79037e+07	1.12815e+07	1.46707e+07	1.25261e+07	1.40137e+07	1.8419e+07
0.969_611.5005			611.5	0.969						level5					1.05137e+07	1.04935e+07	1.09205e+07	9.70738e+06	1.08797e+07	1.00266e+07	1.04429e+07	1.12668e+07	9.46236e+06	1.07411e+07	1.06188e+07	9.03055e+06	1.20287e+07	1.15644e+07	1.0818e+07	1.37671e+07	1.46369e+07	1.35537e+07	1.10571e+07	1.27001e+07	1.18682e+07	9.00955e+06	9.99381e+06	1.04847e+07	9.63771e+06	1.34056e+07
0.97_331.0686	Deoxyadenosine monophosphate	C10 H14 N5 O6 P	331.069	0.97	C00360	S12079	HMDB0000905			level4	Nucleosides, nucleotides, and analogues	Purine nucleotides	Purine deoxyribonucleotides	map00230 Purine metabolism; map01100 Metabolic pathways;	317231	320390	317519	314266	338077	285548	328069	322573	308264	326250	318504	303509	358635	360723	380166	381365	396411	314583	504981	464078	428126	354941	353065	339125	363893	395929
0.972_385.264		C21 H39 N O3 S	385.264	0.972						level5					1.94679e+07	2.08157e+07	1.90069e+07	1.98184e+07	2.15215e+07	1.90801e+07	1.94304e+07	2.049e+07	1.92754e+07	1.78092e+07	2.30044e+07	1.58861e+07	2.15205e+07	2.85173e+07	2.81497e+07	4.7764e+07	3.21036e+07	2.51654e+07	2.1261e+07	2.72442e+07	2.07738e+07	5.50379e+06	1.00556e+07	1.01008e+07	1.69385e+07	2.44181e+07
0.972_413.2599		C16 H40 N5 O3 P S	413.26	0.972						level5					395898	400040	416125	392832	422859	359400	413785	406865	388770	411435	401650	379863	452202	452874	478285	480480	499944	394471	636980	585301	540019	446339	473737	425506	459031	499151
0.973_268.0727	In00295	C16 H12 O4	268.073	0.973	C00858	S4444070	HMDB0005808			level4	Phenylpropanoids and polyketides	Isoflavonoids	O-methylated isoflavonoids		369254	371481	384746	361693	432239	345447	372247	420841	369164	375416	368082	347223	642035	409697	431476	396333	450060	1.66976e+06	570939	529708	484660	402819	399239	385449	1.0796e+06	449846
0.973_316.2388	Pregnane-3,20-dione	C21 H32 O2	316.239	0.973		S389575				level4					5.32285e+06	5.75938e+06	5.30147e+06	5.27157e+06	5.52153e+06	4.42421e+06	5.49158e+06	5.44436e+06	5.44319e+06	5.36076e+06	5.29594e+06	3.40791e+06	5.5863e+06	4.2958e+06	3.89395e+06	4.5779e+06	1.05009e+07	5.44183e+06	9.48428e+06	1.35938e+07	9.15161e+06	5.46321e+06	3.20115e+06	4.27655e+06	8.85129e+06	6.54501e+06
0.974_610.4962		C41 H62 N4	610.496	0.974						level5					1.95656e+07	2.40009e+07	2.54507e+07	2.24716e+07	2.26179e+07	2.17624e+07	2.481e+07	2.62991e+07	2.14252e+07	2.50433e+07	1.87213e+07	1.79558e+07	2.49863e+07	2.44626e+07	2.63788e+07	2.06736e+07	2.22577e+07	2.55988e+07	2.43763e+07	2.45051e+07	2.37119e+07	2.07e+07	2.27234e+07	2.54844e+07	2.13747e+07	2.53598e+07
0.976_381.3233		C23 H43 N O3	381.323	0.976						level5					2.45897e+07	2.84644e+07	2.73857e+07	2.54527e+07	2.89185e+07	2.46164e+07	2.62781e+07	2.74781e+07	2.59017e+07	2.76432e+07	2.62835e+07	2.14711e+07	3.21292e+07	2.89895e+07	3.38963e+07	4.13984e+07	3.09423e+07	3.07889e+07	2.22876e+07	2.95118e+07	2.55327e+07	3.59606e+07	6.90197e+07	1.10536e+07	2.76741e+07	2.54139e+07
0.977_391.2747		C20 H41 N O4 S	391.275	0.977						level5					331394	334123	346823	412354	395846	301871	355130	344438	325524	434324	333727	393628	391295	555848	390637	417302	378115	327423	1.3995e+06	677917	775670	434199	456540	335729	373280	391671
0.978_612.5118		C39 H69 N2 O P	612.512	0.978						level5					6.39316e+06	7.48014e+06	8.61766e+06	4.7454e+06	8.17206e+06	6.74773e+06	5.50093e+06	8.20436e+06	4.40837e+06	7.79153e+06	8.75645e+06	4.43293e+06	1.03168e+07	6.70553e+06	1.00064e+07	9.64408e+06	1.09273e+07	1.07791e+07	9.55367e+06	1.15773e+07	9.42229e+06	9.31137e+06	8.72047e+06	9.27022e+06	8.91788e+06	8.12357e+06
0.978_772.634		C49 H91 P3	772.634	0.978						level5					285626	288615	300220	283414	305078	259294	298532	293539	280484	296836	289777	250287	306125	314264	336346	317169	318180	284597	459558	392789	315419	2.17624e+06	4.61058e+06	291576	382591	331351
0.979_393.3233		C18 H44 N5 O2 P	393.323	0.979						level5					2.59408e+07	2.62895e+07	2.59514e+07	2.65412e+07	2.57936e+07	2.61007e+07	2.6109e+07	2.60692e+07	2.63223e+07	2.58025e+07	2.6215e+07	1.92368e+07	3.43835e+07	2.39181e+07	2.70166e+07	2.59008e+07	2.58938e+07	2.61046e+07	2.2953e+07	2.34732e+07	3.08666e+07	9.41866e+07	1.229e+08	1.73639e+07	4.03848e+07	2.29657e+07
0.98_296.271	Methyl (9e)-9-octadecenoate	C19 H36 O2	296.271	0.98		S4444205				level4					1.71801e+07	1.71801e+07	1.71801e+07	1.71801e+07	1.71801e+07	1.71801e+07	1.71801e+07	1.71801e+07	1.71801e+07	1.71801e+07	1.71801e+07	1.35699e+07	2.2311e+07	2.09154e+07	2.5708e+07	2.24011e+07	2.14767e+07	1.89137e+07	1.64171e+07	2.69476e+07	2.08243e+07	8.5049e+06	1.2527e+07	1.37415e+07	9.86648e+06	2.15115e+07
0.98_306.2565	Eicosa-8,11,14-trienoic acid	C20 H34 O2	306.257	0.98		S4445953				level4					6.39316e+06	7.48014e+06	8.61766e+06	4.7454e+06	8.17206e+06	6.74773e+06	5.50093e+06	8.20436e+06	4.40837e+06	7.79153e+06	8.75645e+06	4.43293e+06	1.03168e+07	7.37902e+06	1.00064e+07	9.64408e+06	1.09273e+07	1.07791e+07	9.55367e+06	1.15773e+07	9.42229e+06	9.31137e+06	8.72047e+06	9.27022e+06	8.91788e+06	8.92823e+06
0.98_553.2864		C25 H50 N O6 P3	553.286	0.98						level5					473092	478041	497263	469428	505310	429477	494467	486197	464574	491659	479966	414558	569033	520525	557100	525336	597425	471386	761181	783991	645314	533368	537027	508473	536193	548826
0.98_610.4937		C34 H67 N4 O3 P	610.494	0.98						level5					1.93851e+07	3.57947e+07	1.75988e+07	1.81097e+07	1.86095e+07	1.53218e+07	2.69228e+07	2.38211e+07	1.83469e+07	2.10454e+07	1.9766e+07	2.2678e+07	2.85598e+07	2.8037e+07	1.92625e+07	3.93781e+07	2.45779e+07	2.77539e+07	2.29119e+07	2.44022e+07	2.18799e+07	2.75193e+07	2.297e+07	2.22382e+07	2.11483e+07	2.94866e+07
0.981_536.2966	Actodigin	C29 H44 O9	536.297	0.981		S10128567				level4					529384	534923	556431	525284	565436	480580	553303	544049	519853	550161	537076	463885	636741	1.0954e+06	1.25116e+06	587845	668512	527476	851753	877277	722099	596833	600927	568975	583544	710187
0.983_748.633		C43 H89 O7 P	748.633	0.983						level5					273969	270451	274865	253791	302128	268321	267859	303214	255535	265994	279450	276942	885497	253703	529979	518292	254874	254330	268217	325215	218730	4.50267e+06	6.5914e+06	249994	677522	288509
0.984_474.2362		C21 H40 N4 O2 P2 S	474.236	0.984						level5					339493	343273	357318	337554	363624	311355	354747	350036	334006	353316	344755	264461	412256	325423	369598	340764	397026	340301	488755	467956	388156	363159	387801	348922	353387	355540
0.987_389.259		C20 H39 N O4 S	389.259	0.987						level5					354419	384242	550670	467337	326010	344413	401296	370082	720901	330345	316210	242974	470452	333613	625564	544753	450969	570453	1.58605e+06	1.36279e+06	1.28849e+06	352833	427851	326866	384061	759153
0.987_586.4951	Octacosyl (2e)-3-(3-hydroxy-4-methoxyphenyl)acrylate	C38 H66 O4	586.495	0.987		S30777289	HMDB0038713			level4	Phenylpropanoids and polyketides	Cinnamic acids and derivatives	Hydroxycinnamic acids and derivatives		2.35095e+07	2.33864e+07	2.41453e+07	2.35668e+07	2.40984e+07	2.23432e+07	2.41556e+07	2.22848e+07	2.41287e+07	2.26081e+07	2.5283e+07	1.77084e+07	2.9535e+07	2.46359e+07	3.06874e+07	3.13049e+07	2.97416e+07	2.76929e+07	2.51997e+07	2.81903e+07	2.62712e+07	1.84811e+07	2.2475e+07	2.49424e+07	3.08374e+07	2.80713e+07
0.987_588.5112		C32 H69 N4 O3 P	588.511	0.987						level5					1.52396e+07	1.64591e+07	1.23467e+07	1.54183e+07	1.66142e+07	1.4863e+07	1.50037e+07	1.45425e+07	1.41855e+07	1.65977e+07	1.50684e+07	1.44487e+07	2.16007e+07	2.00877e+07	1.85049e+07	2.36671e+07	2.15271e+07	2.10744e+07	1.28497e+07	1.89758e+07	1.77979e+07	1.60826e+07	1.51224e+07	1.82433e+07	1.95354e+07	2.0968e+07
0.99_457.2466		C22 H41 N3 O P2 S	457.247	0.99						level5					356240	361475	377714	358452	388278	353789	365729	364327	363947	379408	360405	338385	576141	445112	494165	488267	502133	341291	682077	686560	570280	381343	543977	362752	475501	542932
0.991_379.3076		C17 H42 N5 O2 P	379.308	0.991						level5					2.1932e+07	2.30154e+07	2.32264e+07	2.3457e+07	2.28281e+07	2.23948e+07	2.17427e+07	2.43246e+07	2.17708e+07	2.2326e+07	2.35785e+07	1.60528e+07	2.74059e+07	1.73789e+07	1.9359e+07	2.233e+07	2.14845e+07	2.04553e+07	2.06223e+07	1.9876e+07	2.82809e+07	6.86442e+07	1.12285e+08	1.25957e+07	3.30232e+07	1.8039e+07
0.991_492.3287		C25 H48 O9	492.329	0.991						level5					550371	551296	569202	534721	574262	547122	558124	558055	560399	539940	561775	837835	752414	785016	1.21176e+06	785402	728235	1.21922e+06	1.4841e+06	1.04025e+06	847366	741558	761347	1.62423e+06	581292	996973
0.993_369.3234	4-(stearoylamino)butanoic acid	C22 H43 N O3	369.323	0.993		S142829	HMDB0062341			level4	Organic acids and derivatives	Carboxylic acids and derivatives	Amino acids, peptides, and analogues		7.9608e+07	7.9203e+07	8.00802e+07	7.9332e+07	7.95529e+07	7.95489e+07	7.95532e+07	7.95783e+07	7.96014e+07	7.93774e+07	7.9662e+07	5.91091e+07	1.00414e+08	9.13202e+07	8.60781e+07	1.27027e+08	7.87785e+07	8.70287e+07	6.95748e+07	6.94721e+07	7.89853e+07	2.22954e+08	3.27782e+08	5.13856e+07	1.13828e+08	7.16852e+07
0.993_438.2089		C19 H34 O11	438.209	0.993						level5					1.81615e+06	534563	1.96354e+06	1.33601e+06	1.45995e+06	1.41909e+06	1.82955e+06	1.41381e+06	883364	1.32655e+06	1.51735e+06	2.10734e+06	1.14622e+06	4.39835e+06	3.82521e+06	2.99742e+06	996761	562056	609908	714378	1.43999e+06	787407	546971	489360	4.27874e+06	1.25738e+06
0.993_488.2881		C25 H45 O7 P	488.288	0.993						level5					701492	698595	716169	672454	706778	582834	1.15744e+06	651742	638668	689193	676333	633276	792566	5.57362e+06	759783	764416	846599	622952	1.0418e+06	1.19686e+06	993710	727781	878909	763572	768014	832777
0.993_773.5312			773.531	0.993						level5					1.48596e+06	1.74752e+06	2.22016e+06	2.87439e+06	1.78724e+06	1.74284e+06	2.06016e+06	2.41951e+06	2.12078e+06	1.2188e+06	2.30903e+06	1.27395e+06	6.0225e+06	5.29965e+06	508082	6.65808e+06	1.06238e+07	2.44685e+06	7.8042e+06	7.53945e+06	1.04489e+07	2.56147e+06	4.77578e+06	2.17106e+06	8.35807e+06	1.14539e+06
0.994_455.1989		C18 H33 N O12	455.199	0.994						level5					395199	399111	415154	392368	423495	396619	398820	417621	387432	404152	410480	368043	630977	482225	546172	533989	631901	369699	724595	817428	708577	429301	585147	429318	507809	594764
0.995_367.3078	Prostaglandin f2alpha dimethylamine	C22 H41 N O3	367.308	0.995		S4446227				level4					1.42138e+07	1.41779e+07	1.54937e+07	1.23025e+07	1.28308e+07	1.20323e+07	1.40996e+07	1.55924e+07	1.15397e+07	1.53764e+07	1.30195e+07	1.22026e+07	1.65522e+07	1.61704e+07	1.98855e+07	2.94429e+07	1.51385e+07	1.67331e+07	1.58218e+07	1.32998e+07	1.37888e+07	1.36176e+07	2.47117e+07	5.70135e+06	1.41298e+07	1.57833e+07
0.997_507.3028		C25 H49 N O5 S2	507.303	0.997						level5					905746	885556	352893	926086	1.06258e+06	789143	673994	896145	1.00168e+06	1.0268e+06	430938	519647	447111	748777	1.07814e+06	430936	999858	298483	633106	747281	675806	839550	873066	394494	460454	495435
1_455.2304	Lacidipine	C26 H33 N O6	455.23	1		S4470736				level4					312998	349069	358232	326549	353354	311462	338014	336719	336333	332493	344817	359174	475788	446236	453665	460200	468056	296679	597289	669441	566339	347833	514864	373559	445313	500737
1_510.273		C23 H39 N6 O5 P	510.273	1						level5					996576	1.27582e+06	1.32553e+06	1.35584e+06	846993	1.65532e+06	1.53839e+06	924551	726714	1.32614e+06	1.71374e+06	264341	599259	1.75134e+07	331865	2.35491e+06	4.20528e+06	212326	1.08819e+06	2.87095e+06	3.20762e+06	2.85626e+06	343893	264953	298888	332945
1.001_387.2433		C20 H37 N O4 S	387.243	1.001						level5					344520	422398	396614	362605	393505	353499	375683	352139	437927	394223	347632	401104	534560	504082	514776	521375	522325	333807	633809	689562	596672	513092	560699	821323	494538	564129
1.002_122.0366	4-hydroxybenzaldehyde	C7 H6 O2	122.037	1.002	C00633	MReference-234	HMDB0011718		93.3	level1	Organic oxygen compounds	Organooxygen compounds	Carbonyl compounds	map01100 Metabolic pathways;	7.78946e+06	8.60929e+06	9.43879e+06	7.36669e+06	9.78024e+06	6.30999e+06	9.28162e+06	7.18476e+06	8.66302e+06	8.39541e+06	9.00269e+06	361879	1.60228e+07	3.93497e+06	340434	340325	6.54505e+06	1.83403e+07	2.2973e+07	6.49204e+06	1.69716e+07	326617	596721	7.12998e+06	1.04162e+07	3.79551e+06
1.002_509.3188		C24 H47 N O10	509.319	1.002						level5					723263	433979	456102	631938	439745	475651	577361	477905	558575	535849	513952	406839	552447	502663	800534	522696	595799	379095	765526	896505	733701	485848	633556	500051	576814	577696
1.005_353.2923		C21 H39 N O3	353.292	1.005						level5					5.74565e+06	8.90444e+06	2.88227e+06	9.70181e+06	5.73455e+06	6.0405e+06	6.01115e+06	5.67366e+06	7.39066e+06	5.81306e+06	5.5455e+06	1.35415e+07	1.55659e+09	5.43476e+06	7.93016e+07	5.53611e+07	8.78714e+06	1.23562e+06	1.05729e+08	4.1587e+07	9.95359e+07	2.7039e+06	8.87809e+08	606996	8.97493e+07	9.65977e+07
1.007_431.2305		C20 H39 N3 O P2 S	431.231	1.007						level5					334174	310678	351388	328037	336457	328976	330121	330571	335218	335399	325650	311627	466028	399059	423248	444035	495162	295751	550849	596913	517610	399578	491534	393867	418142	489568
1.01_505.2871		C22 H44 N5 O4 P S	505.287	1.01						level5					649126	470303	499696	538972	483198	524424	528853	517434	524982	547258	518331	444530	634964	579540	597945	611950	724503	476857	1.58721e+06	908784	952623	616696	684848	572072	609538	667948
1.01_584.4794		C38 H64 O4	584.479	1.01						level5					1.36062e+07	1.31938e+07	1.34103e+07	1.38069e+07	1.30714e+07	1.43913e+07	1.07741e+07	1.41213e+07	1.29821e+07	1.40315e+07	1.37856e+07	1.2593e+07	1.63623e+07	1.32297e+07	1.74637e+07	1.67089e+07	1.76502e+07	1.41545e+07	1.6101e+07	1.65373e+07	1.82725e+07	1.66646e+07	1.5104e+07	1.70941e+07	2.07709e+07	1.98887e+07
1.011_562.4956		C36 H66 O4	562.496	1.011						level5					8.49418e+07	8.61889e+07	9.17718e+07	9.0117e+07	8.05887e+07	8.71059e+07	8.49203e+07	8.50267e+07	8.97188e+07	8.49212e+07	8.7621e+07	6.27588e+07	9.20393e+07	9.16278e+07	1.07789e+08	9.68258e+07	1.19865e+08	9.24626e+07	1.01998e+08	1.2958e+08	9.51102e+07	4.66947e+07	7.53105e+07	7.41748e+07	1.00452e+08	1.00407e+08
1.012_363.2434		C18 H37 N O4 S	363.243	1.012						level5					362018	392769	389442	366857	378564	344767	388590	352818	362837	401663	380222	351620	467839	441058	736685	453934	532715	367349	579977	643855	548842	463511	502827	437825	447668	492813
1.012_448.2207		C19 H38 N4 O2 P2 S	448.221	1.012						level5					382374	396473	393664	442289	392083	357683	405160	395684	378409	419281	397268	357272	487906	453128	464048	472561	555541	375690	603293	670917	570978	479223	523503	448787	465772	513853
1.012_490.3129		C23 H49 N4 O P3	490.313	1.012						level5					520006	534231	554497	584945	517906	486282	506512	586231	488781	627150	486837	464464	573980	569554	1.06076e+06	558922	653754	1.00137e+06	720980	812542	684393	580095	619772	629451	553746	758254
1.014_534.4629		C34 H62 O4	534.463	1.014						level5					1.56902e+07	1.59155e+07	1.61061e+07	1.73242e+07	1.58092e+07	1.58228e+07	1.57923e+07	1.61529e+07	1.64253e+07	1.70115e+07	1.51489e+07	8.42387e+06	1.57999e+07	1.28469e+07	2.16307e+07	1.79173e+07	2.54749e+07	1.71978e+07	2.51489e+07	2.57544e+07	1.915e+07	8.4093e+06	8.76672e+06	1.20457e+07	1.75486e+07	2.29603e+07
1.015_399.2763	Epristeride	C25 H37 N O3	399.276	1.015		S61987				level4					1.83838e+07	1.88969e+07	1.86817e+07	2.01787e+07	1.7427e+07	1.81741e+07	1.86292e+07	1.93847e+07	1.7396e+07	1.9642e+07	1.84813e+07	1.87479e+07	2.99945e+07	1.9994e+07	2.59931e+07	3.16274e+07	1.93519e+07	2.7072e+07	1.65911e+07	1.70862e+07	1.98615e+07	2.40362e+07	3.61839e+07	1.11974e+07	2.03003e+07	1.98818e+07
1.017_481.2873		C22 H43 N O10	481.287	1.017						level5					784945	737654	718529	1.06099e+06	900590	739943	798785	759198	959305	909325	694271	684535	725584	451505	1.10897e+06	669450	818897	368212	5.40513e+06	2.06887e+06	3.10743e+06	562205	690689	806582	571476	761299
1.018_558.4641		C36 H62 O4	558.464	1.018						level5					7.13482e+06	9.45789e+06	8.85201e+06	7.52331e+06	9.142e+06	7.78406e+06	7.86981e+06	8.85574e+06	7.58972e+06	8.41208e+06	8.67687e+06	3.01101e+06	9.52765e+06	4.76441e+06	6.60517e+06	5.58662e+06	1.51496e+07	7.58626e+06	1.14176e+07	1.73483e+07	1.21025e+07	6.70436e+06	5.69793e+06	1.13419e+07	1.47657e+07	1.20314e+07
1.019_582.4634		C34 H58 N6 O2	582.463	1.019						level5					2.00672e+06	1.805e+06	1.68613e+06	1.1918e+06	1.84683e+06	1.41565e+06	1.95583e+06	1.58508e+06	1.73413e+06	1.77524e+06	1.55137e+06	661844	953627	781123	1.10856e+06	1.49598e+06	1.69698e+06	1.48872e+06	2.79353e+06	2.42668e+06	1.54816e+06	371151	1.6433e+06	904431	1.95769e+06	1.549e+06
1.02_459.297			459.297	1.02						level5					954697	992951	981971	1.02446e+06	919940	977572	980266	981157	938834	981637	995164	1.00227e+06	820647	986661	693657	1.02171e+06	632444	824475	776935	888604	748580	751462	1.80334e+06	1.14455e+06	1.42964e+06	998764
1.026_359.0818		C11 H22 N O8 P S	359.082	1.026						level5					635901	757901	940737	895899	845130	588764	868302	714016	934924	681523	822085	221882	1.03451e+07	282533	285085	289760	380454	1.23683e+07	3.05346e+06	554427	3.03704e+06	295640	325672	281229	2.78337e+06	694484
1.027_375.2764		C23 H37 N O3	375.276	1.027						level5					4.28814e+07	4.00469e+07	3.94708e+07	3.86838e+07	4.03534e+07	3.70505e+07	4.02839e+07	4.35103e+07	3.8289e+07	4.00245e+07	3.9694e+07	3.92607e+07	5.71641e+07	3.62324e+07	5.72516e+07	5.49849e+07	3.89196e+07	4.86348e+07	4.13902e+07	3.5049e+07	4.37017e+07	1.40186e+07	7.88146e+07	2.5945e+07	4.69688e+07	4.38859e+07
1.029_698.5338		C44 H76 O2 P2	698.534	1.029						level5					1.69143e+06	1.52122e+06	985720	1.5243e+06	867841	2.05768e+06	1.52603e+06	1.35721e+06	1.19399e+06	1.263e+06	1.40659e+06	2.00804e+06	2.50823e+06	2.213e+06	3.32595e+06	1.81678e+06	1.20112e+06	2.73769e+06	1.42972e+06	1.16207e+06	504535	479288	457873	4.76078e+06	784449	6.03289e+06
1.03_268.2394	Trans-10-heptadecenoic acid	C17 H32 O2	268.239	1.03		MReference-9853			82.1	level2					1.12588e+08	1.08024e+08	1.16855e+08	1.0745e+08	1.09936e+08	1.10402e+08	1.10171e+08	1.14331e+08	1.08261e+08	1.10676e+08	1.11428e+08	1.05982e+08	1.45682e+08	1.29417e+08	1.41378e+08	1.44286e+08	1.53309e+08	1.37857e+08	1.49651e+08	1.48706e+08	1.32774e+08	1.13999e+08	1.23293e+08	1.55904e+08	1.33277e+08	1.63576e+08
1.031_488.2971		C19 H45 N4 O8 P	488.297	1.031						level5					3.68458e+06	4.10072e+06	3.51977e+06	4.23809e+06	3.58533e+06	3.02236e+06	4.03026e+06	3.3744e+06	3.8662e+06	3.94067e+06	3.81229e+06	3.20074e+06	2.67966e+06	3.37871e+06	6.24939e+06	4.8573e+06	2.41294e+06	3.14638e+06	3.6297e+06	3.37119e+06	3.35903e+06	6.3415e+06	7.96759e+06	2.90773e+06	3.03524e+06	4.43424e+06
1.034_540.5108		C30 H64 N6 O2	540.511	1.034						level5					5.70545e+06	4.57792e+06	6.03774e+06	4.5181e+06	3.88874e+06	3.875e+06	5.25455e+06	4.60765e+06	3.25919e+06	7.25571e+06	4.93189e+06	1.30762e+07	1.38808e+07	1.67927e+07	6.29521e+06	1.69997e+07	9.17219e+06	1.03485e+07	2.18221e+07	1.37926e+07	1.20699e+07	1.12356e+07	9.2312e+06	1.30504e+07	1.26294e+07	1.35804e+07
1.035_280.1114		C11 H16 N6 O S	280.111	1.035						level5					2.21901e+06	2.21901e+06	2.21901e+06	2.21901e+06	2.21901e+06	2.21901e+06	2.21901e+06	2.21901e+06	2.21901e+06	2.21901e+06	2.21901e+06	1.01667e+07	1.00196e+07	60510.6	1.1161e+06	867593	1.91611e+07	317759	2.44083e+07	4.76493e+06	533058	620393	1.76665e+06	117514	6.07987e+06	2.00735e+07
1.036_297.2377			297.238	1.036						level5					4.1991e+07	4.23064e+07	4.51585e+07	4.26307e+07	4.3691e+07	4.2767e+07	4.10124e+07	4.08148e+07	4.88847e+07	4.26908e+07	4.10073e+07	2.52688e+07	4.88797e+07	3.21251e+07	3.52226e+07	3.33559e+07	7.68841e+07	4.21538e+07	6.8536e+07	9.00679e+07	6.52208e+07	4.74719e+07	3.65682e+07	5.55456e+07	6.89284e+07	5.85814e+07
1.037_276.208	(e)-parinaric acid	C18 H28 O2	276.208	1.037		S4445965				level4					1.01699e+07	1.02693e+07	1.13317e+07	1.05753e+07	1.01272e+07	1.05265e+07	1.03946e+07	1.04782e+07	1.07722e+07	1.02713e+07	1.04648e+07	3.87483e+06	1.12685e+07	5.54439e+06	6.62941e+06	8.13069e+06	2.60562e+07	8.95616e+06	1.92728e+07	2.5348e+07	1.82817e+07	8.29446e+06	3.08118e+06	1.15332e+07	2.27461e+07	1.63792e+07
1.037_353.2921		C21 H39 N O3	353.292	1.037						level5					5.23167e+07	5.23151e+07	5.37203e+07	5.68961e+07	4.61235e+07	5.14455e+07	5.34966e+07	5.47026e+07	4.58331e+07	5.49072e+07	5.37046e+07	4.35249e+07	8.63629e+07	5.2377e+07	9.3504e+07	7.12736e+07	7.94457e+07	8.43201e+07	3.67479e+07	4.87481e+07	5.14885e+07	2.75907e+07	7.07397e+07	3.03423e+07	1.42396e+07	6.77246e+07
1.038_464.2972	(3s,5s)-3-[(e)-{(1r,3as,7ar)-1-[(2r)-6-hydroxy-6-methyl-2-heptanyl]-7a-methyloctahydro-4h-inden-4-ylidene}methyl]-1,3,4,5,6,7-hexahydro-2-benzothiophene-5-ol 2,2-dioxide	C27 H44 O4 S	464.297	1.038		S7826383				level4					8.61123e+06	8.64043e+06	1.0819e+07	8.55037e+06	8.01599e+06	7.68993e+06	8.99633e+06	8.68293e+06	9.71487e+06	8.04252e+06	8.97237e+06	1.01458e+07	4.87008e+06	2.06381e+07	1.33292e+07	7.56917e+06	6.68949e+06	6.4034e+06	9.68756e+06	7.00881e+06	7.20988e+06	1.33241e+07	1.76904e+07	7.738e+06	6.66341e+06	9.26639e+06
1.039_208.0731	(2e)-3-(3,4-dimethoxyphenyl)acrylic acid	C11 H12 O4	208.073	1.039		S626174	HMDB0034315			level4	Phenylpropanoids and polyketides	Cinnamic acids and derivatives	Hydroxycinnamic acids and derivatives		571487	506606	473776	531802	573366	482641	527652	598088	561228	498371	478683	330954	1.79189e+06	384494	370946	402712	515366	431707	801076	523413	1.44708e+06	469370	375398	446614	416177	433601
1.04_303.2483			303.248	1.04						level5					3.03044e+07	3.18e+07	2.88331e+07	3.31579e+07	3.37546e+07	3.02933e+07	3.09374e+07	2.9685e+07	3.08368e+07	3.5971e+07	2.93111e+07	4.37359e+07	5.23386e+07	4.07092e+07	3.14567e+07	5.37253e+07	4.21658e+07	3.52753e+07	5.43539e+07	4.46504e+07	4.46953e+07	4.33185e+07	5.67818e+07	4.15538e+07	3.35595e+07	4.67714e+07
1.04_562.4954		C36 H66 O4	562.495	1.04						level5					3.1464e+07	3.1464e+07	3.1464e+07	3.1464e+07	3.1464e+07	3.1464e+07	3.1464e+07	3.1464e+07	3.1464e+07	3.1464e+07	3.1464e+07	1.10313e+07	2.44349e+06	8.51271e+06	1.746e+07	3.20702e+06	1.341e+07	4.54689e+07	1.36871e+07	1.05098e+07	3.27167e+07	8.2289e+06	2.45098e+07	1.63608e+07	1.46712e+07	1.33779e+07
1.041_266.2235	Hydroprene	C17 H30 O2	266.224	1.041	C18862	S4522732				level4				NULL	5.15388e+06	5.47568e+06	4.38741e+06	5.61289e+06	5.26256e+06	4.49526e+06	5.2054e+06	5.04171e+06	5.20238e+06	4.59537e+06	5.66627e+06	3.24819e+06	6.06371e+06	4.45562e+06	6.10146e+06	4.33287e+06	9.51872e+06	5.31432e+06	8.67534e+06	1.01797e+07	8.76238e+06	4.79271e+06	5.31104e+06	5.60762e+06	1.05405e+07	6.86209e+06
1.042_166.0627	3-(4-hydroxyphenyl)propionic acid	C9 H10 O3	166.063	1.042	C01744	MReference-183	HMDB0002199	73.6	79.7	level2	Phenylpropanoids and polyketides	Phenylpropanoic acids	null	NULL	874076	896020	1.08061e+06	928237	1.02348e+06	871598	960903	943431	754050	1.19181e+06	944881	222374	219427	262813	257052	249435	585052	2.02639e+06	7.04848e+06	1.228e+06	4.07519e+06	289259	224062	300916	629366	307764
1.042_351.2764		C21 H37 N O3	351.276	1.042						level5					3.49184e+07	3.38539e+07	3.58584e+07	3.53293e+07	3.34215e+07	3.46579e+07	3.47932e+07	3.50642e+07	3.37351e+07	3.51938e+07	3.4744e+07	2.8879e+07	5.54324e+07	3.09529e+07	4.19923e+07	3.66561e+07	4.34297e+07	4.40212e+07	3.57607e+07	3.89796e+07	4.74293e+07	4.47157e+07	7.32644e+07	2.87446e+07	4.40294e+07	3.99835e+07
1.042_431.3037		C20 H42 N5 O3 P	431.304	1.042						level5					594066	552153	716084	564235	546456	617226	586905	554984	681229	539123	606567	874576	821668	439830	325654	762024	644905	1.30407e+06	1.387e+06	402940	957427	1.62459e+06	7.37069e+06	879639	1.58635e+06	1.00982e+06
1.043_327.2764	N-heptadecanoylglycine	C19 H37 N O3	327.276	1.043		S16409604	HMDB0013246			level4	Organic acids and derivatives	Carboxylic acids and derivatives	Amino acids, peptides, and analogues		6.35503e+07	6.35503e+07	6.35503e+07	6.35503e+07	6.35503e+07	6.35503e+07	6.35503e+07	6.35503e+07	6.35503e+07	6.35503e+07	6.35503e+07	9.24568e+07	1.09032e+08	9.5921e+07	7.7502e+07	6.73255e+07	8.22286e+07	5.63231e+07	4.05648e+07	6.42453e+07	8.60639e+07	5.71261e+07	1.20863e+08	4.53838e+07	4.27368e+07	9.00106e+07
1.043_404.2879		C24 H40 N2 O S	404.288	1.043						level5					8.77949e+06	8.82444e+06	9.44789e+06	8.65769e+06	9.71081e+06	8.75587e+06	8.99284e+06	8.2067e+06	1.03483e+07	8.50612e+06	9.15299e+06	9.3367e+06	1.0621e+07	6.99656e+06	1.23665e+07	9.60096e+06	6.27432e+06	8.24586e+06	6.10808e+06	4.37584e+06	8.84098e+06	9.42014e+06	4.54179e+07	5.16766e+06	1.17071e+07	9.06424e+06
1.044_414.2717		C23 H43 O2 P S	414.272	1.044						level5					1.45861e+06	911935	1.44021e+06	1.37661e+06	1.3211e+06	1.29381e+06	1.38101e+06	979012	1.1854e+06	1.59801e+06	1.33644e+06	1.20829e+06	1.51778e+07	1.22409e+06	744742	1.09408e+06	1.44051e+06	652594	4.53316e+06	3.26055e+06	4.92705e+06	1.17159e+06	2.96462e+06	562345	1.55683e+06	589915
1.045_429.2867	Adaprolol	C26 H39 N O4	429.287	1.045		S54735				level4					7.94793e+06	7.27028e+06	7.07237e+06	7.59657e+06	8.15838e+06	7.42993e+06	7.01768e+06	7.76318e+06	7.66353e+06	7.9752e+06	7.19909e+06	7.69988e+06	1.10211e+07	6.91782e+06	1.01136e+07	1.12918e+07	7.22315e+06	9.33878e+06	978000	6.17882e+06	7.90141e+06	1.85862e+07	2.76048e+07	4.7259e+06	1.09522e+07	6.86678e+06
1.046_252.2082	Ambrettolide	C16 H28 O2	252.208	1.046		S4517661	HMDB0031086			level4	Phenylpropanoids and polyketides	Macrolides and analogues	null		1.18306e+07	1.20898e+07	1.09589e+07	1.20537e+07	8.56492e+06	1.0308e+07	1.24617e+07	7.65116e+06	1.10858e+07	1.16397e+07	1.34814e+07	4.51792e+06	1.84918e+07	8.62442e+06	1.01724e+07	7.79925e+06	2.65298e+07	1.03092e+07	3.607e+07	3.0379e+07	3.22084e+07	1.61657e+07	1.4869e+07	1.46932e+07	2.17295e+07	1.42393e+07
1.047_268.2031			268.203	1.047						level5					1.7416e+06	1.50691e+06	1.64218e+06	2.03305e+06	1.73604e+06	1.66996e+06	1.70294e+06	1.77171e+06	1.64609e+06	1.72745e+06	1.72994e+06	242779	2.04572e+06	881200	680128	1.16884e+06	5.061e+06	1.13772e+06	5.54018e+06	2.54648e+06	5.11905e+06	1.61461e+06	1.14071e+06	1.18997e+06	1.60632e+06	1.57175e+06
1.047_334.2135	1886839	C20 H30 O4	334.214	1.047	C14504	S6528				level4				NULL	1.24979e+06	1.32159e+06	1.29613e+06	1.34098e+06	1.29557e+06	1.28244e+06	1.29205e+06	1.27736e+06	1.42008e+06	1.22244e+06	1.28587e+06	1.23802e+06	1.19948e+06	1.28207e+06	1.27886e+06	1.43102e+06	1.66877e+06	1.28585e+06	1.38348e+06	1.34954e+06	1.19206e+06	1.4658e+06	1.17408e+07	1.88471e+06	1.274e+06	3.42323e+06
1.047_491.302	Bardoxolone	C31 H41 N O4	491.302	1.047		S354529				level4					4.75147e+06	4.50944e+06	4.59748e+06	5.10053e+06	4.19617e+06	4.22418e+06	4.82139e+06	4.12147e+06	4.87898e+06	4.62252e+06	4.70312e+06	4.36296e+06	3.67186e+06	4.64782e+06	8.39436e+06	7.00469e+06	3.56897e+06	5.26987e+06	4.03047e+06	4.27376e+06	3.45094e+06	9.45929e+06	1.23072e+07	3.35397e+06	4.50574e+06	5.00702e+06
1.047_594.4849		C40 H66 O S	594.485	1.047						level5					441262	474836	456082	461937	478146	442554	456919	477098	416549	471387	482181	349131	384292	387803	341122	433968	567215	474129	474950	513766	462983	489540	386212	491617	469317	538751
1.049_467.1204		C24 H21 N O9	467.12	1.049						level5					404321	381230	414862	418683	431920	391680	403572	422281	368955	417632	427303	253705	339345	345275	302160	383455	420272	423748	420177	454953	409689	364117	341359	438489	414996	411664
1.049_616.4708		C42 H64 O S	616.471	1.049						level5					432984	465928	447525	453270	469176	434251	448347	468147	408734	462543	473135	276438	377082	380528	334722	425827	556574	465234	466039	504127	454297	480356	378966	482394	460512	457428
1.05_326.2808	Mfcd00045988	C20 H38 O3	326.281	1.05		S4516574				level4					1.29777e+08	1.09705e+08	1.08838e+08	1.20752e+08	1.11065e+08	9.79568e+07	1.1787e+08	1.21153e+08	1.14522e+08	1.21004e+08	1.05877e+08	7.95937e+07	1.06271e+07	1.07164e+08	1.02335e+08	1.04546e+08	2.37028e+07	1.1973e+08	1.53157e+08	1.88993e+08	1.42742e+08	1.65979e+08	1.57773e+08	1.33357e+08	1.14013e+08	1.64643e+07
1.05_392.2189	Isodomedin	C22 H32 O6	392.219	1.05	C09115	S390594				level4	Terpenoids	Diterpenoids (C20)	Kaurenes	NULL	736843	750629	734202	768481	727677	743359	743628	744030	734013	758559	737274	539548	717169	696334	701829	773011	986558	755078	1.0007e+06	1.0052e+06	830373	881060	1.21636e+07	795786	805663	831870
1.051_467.3022	Buprenorphine	C29 H41 N O4	467.302	1.051	C08007	S559124	HMDB0015057			level4	Benzenoids	Phenanthrenes and derivatives	null	NULL	9.80459e+06	1.09165e+07	1.05298e+07	1.00459e+07	1.00861e+07	1.01593e+07	1.02389e+07	1.02988e+07	1.08856e+07	9.903e+06	1.0065e+07	1.11648e+07	7.56661e+06	1.14327e+07	1.81285e+07	1.25674e+07	8.71164e+06	1.0917e+07	1.13849e+07	9.89486e+06	8.63612e+06	1.79542e+07	2.40614e+07	7.1029e+06	9.52809e+06	1.04599e+07
1.052_336.2292	12-epileukotriene b4	C20 H32 O4	336.229	1.052		MReference-9883			85.7	level3					1.73101e+07	1.78058e+07	1.73902e+07	1.68722e+07	1.94109e+07	1.64634e+07	1.71346e+07	1.90762e+07	1.69785e+07	1.847e+07	1.66368e+07	1.77524e+07	1.00137e+07	1.18042e+07	1.16817e+07	1.2314e+07	1.08405e+07	1.28065e+07	1.61292e+07	1.24184e+07	1.71417e+07	2.48962e+07	1.04827e+08	2.6005e+07	1.30944e+07	3.23045e+07
1.054_318.2187	Steviol	C20 H30 O3	318.219	1.054	C20212	S398979	HMDB0036706		87	level4	Terpenoids	Diterpenoids (C20)	Kaurenes	NULL	1.60712e+07	1.58901e+07	1.67915e+07	1.46638e+07	1.65199e+07	1.38781e+07	1.62649e+07	1.6871e+07	1.53206e+07	1.67321e+07	1.4812e+07	1.62735e+07	9.56052e+06	9.8987e+06	1.06769e+07	9.9596e+06	9.99286e+06	1.06727e+07	1.63168e+07	1.20747e+07	1.72853e+07	2.12616e+07	7.2102e+07	2.46128e+07	1.0411e+07	3.03251e+07
1.054_405.2869	(+)-cassaine	C24 H39 N O4	405.287	1.054	C08670	S4444673				level4	Alkaloids	Alkaloids derived by amination reactions	Terpenoid alkaloids	NULL	1.46787e+07	1.45568e+07	1.46989e+07	1.43721e+07	1.42752e+07	1.4208e+07	1.45866e+07	1.41095e+07	1.58738e+07	1.48281e+07	1.33809e+07	1.58031e+07	1.83673e+07	1.65617e+07	2.52332e+07	2.05164e+07	1.18565e+07	1.82395e+07	1.11953e+07	8.81062e+06	1.47967e+07	4.16365e+07	7.16331e+07	8.03184e+06	1.88189e+07	1.54579e+07
1.055_285.2737			285.274	1.055						level5					1.47792e+08	1.32151e+08	1.66013e+08	1.40619e+08	1.5007e+08	1.34224e+08	1.46125e+08	1.44576e+08	1.41529e+08	1.5066e+08	1.47701e+08	2.75615e+08	2.95419e+08	3.16379e+08	1.53426e+08	2.78593e+08	2.27482e+08	2.12904e+08	3.11245e+08	2.64426e+08	2.4299e+08	2.63323e+08	2.25111e+08	2.76818e+08	2.78556e+08	2.48464e+08
1.055_390.272		C19 H38 N2 O6	390.272	1.055						level5					2.77257e+06	2.12952e+06	2.45623e+06	2.66028e+06	1.96458e+06	2.72776e+06	1.39697e+06	2.89007e+06	2.45516e+06	2.42111e+06	2.3959e+06	2.07915e+06	1.79389e+06	1.3471e+06	2.42787e+06	1.76912e+06	1.76847e+06	774686	8.64652e+06	4.86194e+06	4.81328e+06	2.25347e+06	2.26324e+06	1.30427e+06	1.44881e+06	1.05343e+06
1.056_385.2608	(1s,2r,7r,8r,11r,12r)-12-methyl-6-methylene-17-oxa-14-azahexacyclo[10.6.3.1~5,8~.0~1,11~.0~2,8~.0~14,18~]docos-7-yl acetate	C24 H35 N O3	385.261	1.056	C08703	S390353				level4				NULL	1.21405e+07	1.11517e+07	1.26097e+07	1.15167e+07	1.10227e+07	1.1621e+07	1.1766e+07	1.11818e+07	1.23699e+07	1.13378e+07	1.182e+07	1.10381e+07	1.38113e+07	1.00638e+07	1.67133e+07	1.71819e+07	1.10563e+07	1.4738e+07	1.27145e+07	1.43779e+07	1.55712e+07	1.94858e+07	2.66849e+07	6.46597e+06	1.44688e+07	1.20012e+07
1.056_407.2297		C18 H39 N3 O P2 S	407.23	1.056						level5					904065	1.23444e+06	773376	821286	1.43325e+06	1.04871e+06	805014	1.00099e+06	939538	1.36518e+06	836174	1.47257e+06	1.78977e+06	636761	587870	365160	1.23566e+06	593402	3.0731e+06	1.59018e+06	2.12964e+06	679014	951434	3.6259e+06	438803	783554
1.057_222.125	2453103	C13 H18 O3	222.125	1.057		S21212	HMDB0061943			level4	Benzenoids	Benzene and substituted derivatives	Benzoic acids and derivatives		621492	585999	637696	643568	663916	602062	620341	649099	567131	641953	656819	389977	521617	530731	464458	589418	646011	651355	645864	699321	629743	559693	7.8144e+06	674014	637901	632779
1.057_307.2581		C13 H33 N5 O3	307.258	1.057						level5					1.23058e+08	1.35627e+08	1.51145e+08	1.27712e+08	1.45486e+08	1.18805e+08	1.40587e+08	1.4286e+08	1.28712e+08	1.35557e+08	1.32904e+08	1.29036e+08	1.47256e+08	1.40401e+08	1.65724e+08	1.72131e+08	1.80147e+08	1.44589e+08	1.61588e+08	1.84727e+08	1.53736e+08	1.32071e+08	1.30617e+08	1.40299e+08	1.46948e+08	1.5663e+08
1.057_351.2766		C21 H37 N O3	351.277	1.057						level5					3.24795e+07	3.14893e+07	3.33539e+07	3.28617e+07	3.10871e+07	3.22372e+07	3.23631e+07	3.26151e+07	3.13789e+07	3.27357e+07	3.23173e+07	1.23746e+06	3.46735e+06	2.34736e+07	4.01334e+06	3.40959e+07	4.03963e+07	4.09465e+07	187528	131061	1.15961e+06	4.15925e+07	467491	2.67369e+07	4.09541e+07	3.71908e+07
1.058_386.264		C17 H34 N6 O4	386.264	1.058						level5					2.57434e+06	2.58795e+06	2.79665e+06	2.80312e+06	2.49263e+06	2.40955e+06	2.62779e+06	2.6652e+06	2.70661e+06	2.38995e+06	2.81137e+06	2.42092e+06	2.81486e+06	2.23974e+06	2.51003e+06	3.85128e+06	2.11764e+06	2.87066e+06	2.79221e+06	4.67048e+06	3.45603e+06	3.65448e+06	5.5959e+06	1.42012e+06	2.40699e+06	2.30832e+06
1.059_348.2654	Anacardic acid	C22 H36 O3	348.265	1.059	C10759	S146579	HMDB0029683			level4	Benzenoids	Benzene and substituted derivatives	Benzoic acids and derivatives	NULL	2.30477e+06	1.87279e+06	2.33629e+06	2.02314e+06	2.5166e+06	2.06612e+06	2.11691e+06	2.08571e+06	2.54551e+06	2.03897e+06	2.13208e+06	1.2314e+06	2.79759e+06	498543	1.24893e+06	512881	4.1674e+06	2.7389e+06	4.10929e+06	4.7142e+06	7.84078e+06	3.05357e+06	4.36081e+06	3.07443e+06	1.94345e+06	4.57177e+06
1.06_394.2742		C16 H38 N6 O3 S	394.274	1.06						level5					1.13582e+07	1.2134e+07	8.60705e+06	1.12048e+07	1.58277e+07	7.70238e+06	1.22609e+07	9.66634e+06	1.07462e+07	1.2662e+07	1.18299e+07	8.48839e+06	1.48563e+07	1.56482e+07	1.4146e+07	2.06228e+07	1.63553e+07	1.07361e+07	3.9986e+07	3.19046e+07	2.2719e+07	5.91281e+06	1.49827e+07	9.52882e+06	9.03919e+06	1.70397e+07
1.063_447.3345	N-stearoyltyrosine	C27 H45 N O4	447.334	1.063		S2284895				level4					1.89107e+06	2.18011e+06	1.72494e+06	1.92152e+06	2.02195e+06	1.98758e+06	1.82603e+06	1.80072e+06	2.19309e+06	1.99484e+06	1.83714e+06	2.17173e+06	1.82812e+06	2.21406e+06	2.03337e+06	1.63297e+06	1.38925e+06	1.14387e+06	2.45864e+06	3.01332e+06	2.88452e+06	6.03744e+06	4.89545e+06	1.08536e+06	1.88679e+06	1.13273e+06
1.064_350.2117		C13 H32 N6 O P2	350.212	1.064					35.1	level5					3.86043e+06	3.86043e+06	3.86043e+06	3.86043e+06	3.86043e+06	3.86043e+06	3.86043e+06	3.86043e+06	3.86043e+06	3.86043e+06	3.86043e+06	1.77855e+06	1.46246e+06	2.05016e+06	6.19762e+06	4.34335e+06	3.29196e+06	1.79397e+06	4.76552e+06	6.17741e+06	3.60724e+06	846065	455899	968347	959157	4.00454e+06
1.065_352.2272		C17 H36 O5 S	352.227	1.065						level5					2.3425e+07	2.6658e+07	2.35015e+07	2.5281e+07	2.65758e+07	2.36758e+07	2.52962e+07	2.45207e+07	2.60954e+07	2.55381e+07	2.35831e+07	3.09455e+07	3.93101e+07	4.19047e+07	4.48484e+07	5.68956e+07	5.50269e+07	2.43973e+07	6.39819e+07	5.04775e+07	4.66987e+07	2.39494e+07	2.95678e+07	3.33805e+07	3.12433e+07	7.10791e+07
1.065_362.2448	Ti1090000	C22 H34 O4	362.245	1.065	C14575	S18194			63.3	level4				NULL	6.43856e+07	5.97717e+07	6.16853e+07	6.26698e+07	6.26139e+07	6.16897e+07	6.23401e+07	6.24942e+07	6.31296e+07	6.17032e+07	6.15442e+07	6.54426e+07	8.30158e+07	3.19989e+07	4.99014e+07	3.78415e+07	5.11775e+07	8.00207e+07	1.11095e+08	5.5019e+07	7.62677e+07	4.14597e+07	9.8122e+07	9.42236e+07	6.2429e+07	1.04697e+08
1.065_635.3228		C23 H49 N5 O15	635.323	1.065						level5					623690	533474	588842	607695	644574	591250	587231	591196	585903	620152	592089	316441	789572	1.42663e+06	356879	898726	1.12876e+06	681278	573422	978078	546335	3.02338e+06	927370	626304	1.87448e+06	633680
1.066_438.2724		C23 H38 N2 O6	438.272	1.066						level5					3.68269e+06	2.84658e+06	3.54604e+06	5.43126e+06	3.05172e+06	2.76543e+06	2.58861e+06	4.85284e+06	2.85675e+06	4.6885e+06	2.91861e+06	1.99941e+06	2.683e+06	996198	2.80383e+06	335411	331209	1.87432e+06	6.68725e+06	3.48144e+06	3.41338e+06	618183	2.66484e+06	1.16692e+06	1.27016e+06	1.80781e+06
1.067_448.2561		C18 H37 N6 O5 P	448.256	1.067						level5					2.7093e+06	2.59376e+06	2.45275e+06	2.46315e+06	2.72576e+06	2.53389e+06	2.57671e+06	2.5054e+06	2.78938e+06	2.40195e+06	2.65493e+06	1.94848e+06	1.13008e+06	1.93038e+06	3.05702e+06	2.1674e+06	1.69118e+06	609486	5.20026e+06	5.54627e+06	4.80869e+06	2.39996e+06	3.50127e+06	632925	1.28385e+06	951528
1.068_445.3181	Oleoyl tyrosine	C27 H43 N O4	445.318	1.068		S32698867	HMDB0062337			level4	Organic acids and derivatives	Carboxylic acids and derivatives	Amino acids, peptides, and analogues		1.43485e+07	1.43485e+07	1.43485e+07	1.43485e+07	1.43485e+07	1.43485e+07	1.43485e+07	1.43485e+07	1.43485e+07	1.43485e+07	1.43485e+07	1.09581e+07	7.54765e+06	1.6425e+07	2.38602e+07	1.40684e+07	1.25334e+07	1.3313e+07	1.70843e+07	2.10423e+07	1.35756e+07	1.46376e+07	2.35706e+07	6.26371e+06	9.42137e+06	9.22573e+06
1.068_468.2821		C24 H40 N2 O7	468.282	1.068						level5					1.584e+06	1.59777e+06	1.4224e+06	1.29809e+06	1.68391e+06	1.51576e+06	1.57164e+06	1.35785e+06	1.65771e+06	1.39087e+06	1.61851e+06	705144	1.10512e+06	1.42634e+06	2.48031e+06	972865	1.17966e+06	931478	1.3333e+06	3.41237e+06	4.21912e+06	1.75792e+06	6.60287e+06	197979	915810	481479
1.068_469.3183		C21 H47 N3 O6 S	469.318	1.068						level5					995039	815049	840321	868546	835763	858213	884402	806142	1.14912e+06	833806	746554	623356	191762	1.06703e+06	1.46081e+06	957961	530399	937447	576284	807810	899889	1.97401e+06	1.80889e+06	368023	523736	632463
1.068_514.302		C24 H42 N4 O8	514.302	1.068						level5					132038	148161	129306	130078	143007	137421	134248	136747	133969	131708	143377	72687.4	107735	96557.4	90274.2	122975	182672	211361	137935	134101	129982	154131	122674	158844	165116	198245
1.07_324.2654	(11s,12e,14z)-11-hydroxy-12,14-icosadienoic acid	C20 H36 O3	324.265	1.07		S4445831				level4					6.37322e+08	8.64242e+08	5.87768e+08	5.56439e+08	6.16262e+08	6.78679e+08	7.01612e+08	5.83955e+08	6.51807e+08	6.62939e+08	6.72771e+08	6.03155e+08	9.03234e+07	5.12932e+08	8.44414e+08	8.50747e+08	8.52108e+08	9.02256e+08	7.67995e+08	8.21032e+08	7.25626e+08	6.07196e+08	6.31389e+08	7.49443e+08	6.89725e+08	8.1944e+08
1.071_294.1822	Embelin	C17 H26 O4	294.182	1.071	C10342	S3105				level4				NULL	5.72603e+06	5.15989e+06	5.50626e+06	5.38703e+06	5.79092e+06	5.4745e+06	5.43559e+06	5.54979e+06	5.69251e+06	5.46019e+06	5.36401e+06	6.85429e+06	5.05823e+06	5.67589e+06	7.05756e+06	8.04959e+06	5.95694e+06	5.19046e+06	1.20752e+07	5.58521e+06	7.23183e+06	4.67115e+06	6.00844e+06	5.03009e+06	4.08083e+06	6.62954e+06
1.071_366.2761		C22 H38 O4	366.276	1.071						level5					9.05502e+06	8.93832e+06	9.81303e+06	9.05355e+06	1.01704e+07	8.22963e+06	9.43496e+06	8.81536e+06	9.85793e+06	9.09408e+06	9.41836e+06	1.29273e+07	8.64893e+06	8.64754e+06	1.15267e+07	9.14634e+06	1.17431e+07	8.18702e+06	1.10328e+07	1.50576e+07	1.41104e+07	1.27244e+07	1.51001e+07	9.7259e+06	9.85299e+06	1.26902e+07
1.072_508.3134		C23 H48 N4 O4 S2	508.313	1.072						level5					2.06468e+06	1.84974e+06	1.78711e+06	2.10133e+06	2.13403e+06	1.87677e+06	1.98922e+06	1.71805e+06	2.24401e+06	1.76959e+06	2.16277e+06	1.39729e+06	498992	1.67573e+06	3.3351e+06	1.26681e+06	1.97531e+06	498786	3.48759e+06	4.45432e+06	1.9489e+06	1.16987e+06	2.03865e+06	418633	703065	727315
1.073_346.2499	Ginkgoic acid	C22 H34 O3	346.25	1.073	C10794	S4445152	HMDB0033897	48.5	84.8	level4	Benzenoids	Benzene and substituted derivatives	Benzoic acids and derivatives	NULL	1.24193e+08	2.21942e+08	1.59219e+08	1.49667e+08	1.74895e+08	2.04625e+08	1.62964e+08	1.43068e+08	1.76478e+08	1.48547e+08	1.87031e+08	3.1549e+08	2.06395e+08	1.4367e+08	2.71274e+08	2.3425e+08	2.91808e+08	1.74452e+08	1.54294e+08	1.6552e+08	1.81437e+08	2.7896e+08	2.27978e+08	2.72414e+08	3.06829e+08	2.57161e+08
1.074_407.303	Cassaidine	C24 H41 N O4	407.303	1.074	C08669	S4444672				level4	Alkaloids	Alkaloids derived by amination reactions	Terpenoid alkaloids	NULL	2.0085e+06	1.79044e+06	1.85934e+06	1.64379e+06	1.82904e+06	1.88459e+06	1.80455e+06	2.08382e+06	1.74087e+06	1.64947e+06	1.92444e+06	1.96205e+06	2.20176e+06	2.02155e+06	2.14739e+06	2.50667e+06	1.41227e+06	2.26545e+06	925706	1.3432e+06	1.6238e+06	5.49072e+06	9.53371e+06	722597	1.96352e+06	1.46599e+06
1.076_444.2831		C16 H41 N6 O6 P	444.283	1.076						level5					237438	271119	240877	234811	256627	246312	249142	251422	243144	235393	261013	1.69416e+06	458600	229897	204126	1.89847e+06	50208.8	439660	107327	252158	124991	339581	464228	1.36142e+06	535259	445033
1.078_320.2343	11,12-epoxy-(5z,8z,11z)-icosatrienoic acid	C20 H32 O3	320.234	1.078	C14770	MReference-1453			84	level2	FA Fatty acyls	FA03 Eicosanoids	FA0305 Hydroxy/hydroperoxyeicosatrienoic acids	map00590 Arachidonic acid metabolism; map01100 Metabolic pathways; map04270 Vascular smooth muscle contraction; map04726 Serotonergic synapse; map04913 Ovarian steroidogenesis;	1.61084e+08	1.78875e+08	1.65891e+08	1.41473e+08	1.51709e+08	1.88745e+08	1.6063e+08	1.50855e+08	1.904e+08	1.5679e+08	1.4934e+08	2.03317e+08	1.4258e+08	8.59208e+07	1.06748e+08	8.69039e+07	1.4295e+08	1.239e+08	2.06956e+08	1.8505e+08	2.68328e+08	1.78154e+08	3.8888e+08	2.41668e+08	1.42611e+08	2.13349e+08
1.08_451.307		C21 H45 N3 O5 S	451.307	1.08						level5					249070	203550	237681	236072	256676	234724	232975	222756	213041	284410	224675	129241	180897	166922	154524	208525	305525	368371	227128	215067	213017	692656	3.35786e+06	275606	282575	229118
1.081_387.2767	Myxalamid c	C24 H37 N O3	387.277	1.081	C12160	S10128296				level4				NULL	2.16814e+06	5.12915e+06	1.83328e+06	2.91151e+06	2.76835e+06	2.58235e+06	2.98542e+06	2.71227e+06	2.64569e+06	2.90422e+06	2.73748e+06	1.68277e+07	1.28499e+07	3.08105e+07	4.43924e+07	2.86142e+07	6.95183e+06	2.92733e+07	3.62392e+06	1.82196e+06	5.97479e+06	2.76677e+07	1.00009e+07	2.41483e+07	2.87893e+06	1.26475e+07
1.082_256.073	Isoliquiritigenin	C15 H12 O4	256.073	1.082	C08650	S553829	HMDB0037316			level4	Phenylpropanoids and polyketides	Linear 1,3-diarylpropanoids	Chalcones and dihydrochalcones		2.48651e+06	2.46036e+06	2.55715e+06	2.5878e+06	2.72057e+06	2.41433e+06	2.60486e+06	2.2856e+06	2.58638e+06	2.60921e+06	2.65361e+06	2.75618e+06	2.50523e+06	1.83666e+06	804775	2.07217e+06	1.72775e+06	789295	4.90855e+06	2.11731e+06	4.42274e+06	135329	2.47169e+06	4.28961e+06	1.90686e+06	3.05498e+06
1.083_365.1617	Nequinate	C22 H23 N O4	365.162	1.083		S24579	HMDB0031754			level4	Organoheterocyclic compounds	Quinolines and derivatives	Quinolones and derivatives		3.1298e+06	2.94918e+06	2.83779e+06	2.84329e+06	3.65133e+06	2.80762e+06	3.05634e+06	2.8823e+06	3.06084e+06	3.05788e+06	3.15651e+06	97359.9	1.93909e+07	501945	128225	132344	2.16743e+06	2.614e+07	8.35328e+06	2.89775e+06	1.19663e+07	167049	148445	149193	3.80656e+06	3.22919e+06
1.083_443.3023		C27 H41 N O4	443.302	1.083						level5					2.84513e+07	2.87844e+07	2.71266e+07	2.7595e+07	3.02439e+07	2.82554e+07	2.92145e+07	2.71566e+07	2.90383e+07	2.73768e+07	2.95225e+07	2.60183e+07	2.83726e+07	3.23232e+07	3.39506e+07	3.14381e+07	2.76226e+07	2.63991e+07	2.61951e+07	3.5673e+07	3.07528e+07	7.07774e+07	8.149e+07	1.57955e+07	3.15526e+07	2.56464e+07
1.084_329.2427		C15 H31 N5 O3	329.243	1.084						level5					3.9493e+07	4.66571e+07	3.465e+07	3.92997e+07	4.19127e+07	4.13916e+07	4.05366e+07	3.57591e+07	4.90025e+07	3.37127e+07	4.37176e+07	4.67834e+07	6.4629e+07	3.91394e+07	5.23365e+07	6.32626e+07	5.66348e+07	3.70077e+07	3.49666e+07	3.72053e+07	5.64653e+07	5.17519e+07	1.57124e+08	6.29779e+07	1.09369e+08	6.19625e+07
1.084_403.2713		C24 H37 N O4	403.271	1.084						level5					600864	451966	823715	528087	611469	551537	691822	764336	436116	611047	579165	627335	630351	744039	746521	1.57044e+06	418022	980498	342827	435164	303583	788543	2.39558e+06	241405	421460	609743
1.085_376.2269		C21 H33 N2 O2 P	376.227	1.085						level5					1.33807e+07	1.33807e+07	1.33807e+07	1.33807e+07	1.33807e+07	1.33807e+07	1.33807e+07	1.33807e+07	1.33807e+07	1.33807e+07	1.33807e+07	7.17738e+06	9.0752e+06	6.4086e+06	1.29546e+07	7.62048e+06	1.35859e+07	5.64744e+06	2.44998e+07	7.90156e+06	1.72148e+07	7.79285e+06	1.76101e+07	2.33558e+06	1.15865e+07	1.3148e+07
1.086_292.203	12-oxo phytodienoic acid	C18 H28 O3	292.203	1.086	C01226	S4444088				level4	FA Fatty acyls	FA02 Octadecanoids	FA0201 12-oxophytodienoic acid metabolites	map00592 alpha-Linolenic acid metabolism; map01100 Metabolic pathways;	806997	915816	968780	800794	747904	952830	863972	982702	630776	1.26253e+06	683499	807998	491899	497908	336449	357279	481280	689847	613296	555877	402546	2.14936e+06	2.39452e+06	2.09157e+06	815041	511726
1.086_383.2298		C20 H33 N O6	383.23	1.086						level5					3.08083e+06	3.30396e+06	3.32066e+06	3.46011e+06	2.90603e+06	2.88037e+06	3.31175e+06	3.06044e+06	2.94224e+06	4.06825e+06	2.80319e+06	3.40323e+06	5.27778e+06	2.03131e+06	3.14945e+06	1.74101e+06	2.39877e+06	2.78999e+06	7.29855e+06	2.16491e+06	7.44879e+06	4.96249e+06	5.61406e+06	5.06518e+06	2.39579e+06	8.47366e+06
1.086_459.2791		C21 H42 N5 O2 P S	459.279	1.086						level5					72025.8	65756.3	71382.9	74670.6	77454.1	71136.7	72806.4	63147.5	78237	72613.4	72536.9	53506.2	68712.4	53894.7	53944.8	80096.5	81180.5	88530.9	64842	87649.5	78652.2	74376.5	342523	87432	169735	81980
1.086_466.2738		C22 H38 N6 O3 S	466.274	1.086						level5					356613	354935	330647	318244	398310	341050	342896	383996	373288	277359	385571	430866	197987	292012	646794	506577	220076	366345	159091	268538	248409	872625	122693	683574	392881	647968
1.086_506.2976		C21 H43 N6 O6 P	506.298	1.086						level5					4.01767e+06	3.89905e+06	4.06863e+06	4.07193e+06	4.48573e+06	3.74854e+06	4.10037e+06	3.94436e+06	4.21545e+06	3.9532e+06	4.16959e+06	2.6928e+06	3.48857e+06	4.29664e+06	5.63872e+06	3.85869e+06	5.63392e+06	2.49138e+06	7.18897e+06	7.64618e+06	5.56422e+06	7.5039e+06	8.14906e+06	1.72849e+06	3.63388e+06	3.3986e+06
1.088_676.5292		C35 H73 N4 O6 P	676.529	1.088						level5					841486	777886	863964	655345	799227	716963	848004	707257	789408	873689	741612	415405	1.07482e+06	1.83597e+06	558176	609827	583133	502796	1.5591e+06	720131	1.09634e+06	892764	948154	561034	356535	546819
1.089_678.4631		C41 H62 N2 O6	678.463	1.089						level5					93750.1	85589.6	92913.3	97192.6	100816	92592.9	94766.2	82194	101835	94514.9	94415.3	69644.7	89437.3	70150.4	70215.5	88884.4	105666	115233	84399.5	114086	102375	96809.8	91560.9	113803	107226	106707
1.09_284.2496		C21 H32	284.25	1.09						level5					100993	92202.4	100092	104702	108605	99746.9	102088	88544.5	109703	101817	101710	75025.6	96347.4	75570.4	75640.5	95751.8	113830	124137	90920.4	122901	110285	118408	98635.1	122596	115511	114951
1.09_305.2425		C13 H31 N5 O3	305.243	1.09						level5					1.14225e+08	1.14225e+08	1.14225e+08	1.14225e+08	1.14225e+08	1.14225e+08	1.14225e+08	1.14225e+08	1.14225e+08	1.14225e+08	1.14225e+08	1.72866e+09	6.36447e+07	3.63175e+08	6.41579e+07	4.49304e+07	9.73857e+07	9.61512e+08	3.12992e+07	7.38905e+07	1.32124e+08	2.45623e+08	1.94514e+08	7.4467e+08	2.26423e+08	9.49258e+07
1.09_670.5163		C42 H70 O6	670.516	1.09						level5					1.41428e+06	1.41428e+06	1.41428e+06	1.41428e+06	1.41428e+06	1.41428e+06	1.41428e+06	1.41428e+06	1.41428e+06	1.41428e+06	1.41428e+06	1.28844e+06	1.05174e+06	1.99679e+06	1.24488e+06	1.12705e+06	1.04347e+06	1.54324e+06	1.50388e+06	886513	1.92241e+06	2.4957e+06	2.22677e+06	1.41061e+06	1.06947e+06	917692
1.09_746.4505		C43 H63 N4 O5 P	746.451	1.09						level5					86610.4	79240.9	86204.4	90352.2	93873.5	85944.4	87025.2	76303.3	95918.2	89511.6	84833.1	64927.1	82340.9	65435.3	65251.4	82200.5	77150.4	107564	77850	77582.6	94699.4	90067	84001.4	106205	98534.2	98341.9
1.091_413.2166		C21 H36 N O3 P S	413.217	1.091						level5					106406	111604	106512	111957	116644	109306	111445	96472.8	119993	111534	111583	80892.6	105390	82495.4	82865.3	104921	124351	135014	98938.7	134233	120067	129654	107393	133609	125681	125811
1.091_418.2735	(+)-simvastatin	C25 H38 O5	418.274	1.091		S49179	HMDB0005007			level4	Organoheterocyclic compounds	Lactones	Delta valerolactones		4.68333e+06	5.16316e+06	6.05419e+06	5.09364e+06	5.13302e+06	4.95037e+06	4.42121e+06	6.6125e+06	4.50108e+06	5.4723e+06	4.88194e+06	2.62418e+06	4.65548e+06	3.16072e+06	4.98376e+06	4.02105e+06	5.88887e+06	2.65565e+06	635505	9.90994e+06	7.40324e+06	3.61952e+06	4.5861e+06	3.77226e+06	5.50974e+06	5.77627e+06
1.092_361.2608	N-arachidonylglycine	C22 H35 N O3	361.261	1.092		S4446510	HMDB0005096			level4	Organic acids and derivatives	Carboxylic acids and derivatives	Amino acids, peptides, and analogues		3.1945e+07	3.23613e+07	3.2716e+07	3.20388e+07	3.26947e+07	3.23992e+07	3.28859e+07	3.17576e+07	3.17669e+07	3.1279e+07	3.42236e+07	3.68369e+07	4.27432e+07	3.37196e+07	4.78153e+07	4.51007e+07	2.83097e+07	4.04468e+07	2.55568e+07	2.22866e+07	2.90454e+07	5.44183e+07	9.06473e+07	2.25736e+07	4.01464e+07	3.54013e+07
1.093_424.2562		C22 H36 N2 O6	424.256	1.093						level5					1.36132e+07	1.33976e+07	1.46152e+07	1.3791e+07	1.39124e+07	1.344e+07	1.38968e+07	1.33138e+07	1.43818e+07	1.34498e+07	1.40982e+07	1.58733e+07	1.68297e+07	1.59596e+07	1.86997e+07	1.84912e+07	1.33504e+07	1.49267e+07	192073	1.24086e+07	1.51616e+07	1.90583e+07	2.33654e+07	7.91123e+06	1.54843e+07	1.22836e+07
1.094_244.2032	Mfcd00059633	C14 H28 O3	244.203	1.094		S15252				level4					7.71177e+06	8.39716e+06	7.98443e+06	7.70837e+06	9.13984e+06	7.07862e+06	8.10614e+06	7.85708e+06	7.69841e+06	8.3472e+06	8.43947e+06	5.21199e+06	5.75831e+06	1.15854e+07	1.11127e+07	8.71028e+06	1.17903e+07	7.60274e+06	1.39902e+07	1.49632e+07	1.06524e+07	9.12413e+06	5.82883e+06	4.92624e+06	7.10429e+06	9.38713e+06
1.095_312.2292	(+/-)9-hpode	C18 H32 O4	312.229	1.095		MReference-9923			67.7	level2					5.12333e+07	5.3917e+07	2.4368e+07	4.96579e+07	2.63163e+07	4.51378e+07	4.03796e+07	3.90917e+07	3.97494e+07	3.94861e+07	4.00824e+07	4.62388e+07	2.25698e+07	2.70298e+07	1.15721e+07	2.00777e+07	1.17725e+07	1.91998e+07	4.66111e+06	2.09349e+07	1.91617e+07	1.05013e+08	2.69708e+08	1.29341e+08	2.07911e+07	5.42481e+07
1.095_435.2794	(2s,4ar,4br,6as,12bs,12cs,14as)-2-(2-hydroxy-2-propanyl)-12b,12c-dimethyl-3,4,5,6,6a,7,12,12b,12c,13,14,14a-dodecahydro-2h-chromeno[5',6':6,7]indeno[1,2-b]indole-4a(4bh)-carbaldehyde	C28 H37 N O3	435.279	1.095	C20587	S8518408				level4					94494.3	94494.3	94494.3	94494.3	94494.3	94494.3	94494.3	94494.3	94494.3	94494.3	94494.3	74586.4	260186	70760.6	79543	114919	221425	84152	88351.7	99241.1	88195.8	115679	609130	342342	524822	136071
1.099_282.255	Trans-petroselinic acid	C18 H34 O2	282.255	1.099		MReference-9851			79.1	level2					7.38822e+07	6.74016e+07	6.17535e+07	7.64642e+07	6.94134e+07	6.96302e+07	6.95468e+07	6.96543e+07	6.51718e+07	7.89612e+07	6.54462e+07	4.90991e+07	4.79515e+08	4.9637e+07	8.37152e+07	4.21752e+08	1.2262e+08	6.90655e+07	1.35352e+08	2.40617e+08	2.54057e+08	1.46348e+08	3.37539e+08	3.62033e+07	7.2605e+08	1.6899e+08
1.099_376.2639		C20 H40 O4 S	376.264	1.099						level5					3.85719e+06	4.79999e+06	3.85277e+06	3.36189e+06	6.30338e+06	4.14576e+06	3.18676e+06	5.45124e+06	4.92423e+06	3.38935e+06	4.29955e+06	3.40399e+06	7.16742e+06	6.07786e+06	4.48761e+06	1.15427e+07	6.16964e+06	4.64102e+06	1.68359e+07	1.21363e+07	4.19993e+06	2.74498e+06	6.07723e+06	2.61104e+06	3.46977e+06	4.94068e+06
1.099_441.3232		C22 H44 N5 O2 P	441.323	1.099						level5					108750	123949	106275	109776	119601	110223	120853	103910	110596	117805	116700	100509	116020	98958	96370.8	107530	107627	121251	105927	106020	128861	148127	463143	129555	134322	139312
1.1_324.227		C14 H32 N2 O6	324.227	1.1						level5					6.47949e+06	6.56096e+06	6.51976e+06	7.05672e+06	7.82626e+06	4.89577e+06	7.22044e+06	8.01485e+06	6.28665e+06	5.6544e+06	7.28898e+06	5.25744e+06	4.3421e+06	6.0358e+06	6.95947e+06	5.39823e+06	7.23897e+06	3.94289e+06	8.97802e+06	1.40879e+07	1.00042e+07	4.77472e+06	7.76177e+06	5.53192e+06	4.05682e+06	6.403e+06
1.1_453.3251		C23 H44 N5 O2 P	453.325	1.1						level5					98378.9	111736	95541.6	98387.9	106852	102686	101299	100471	100748	104961	101689	78445.2	100217	83173.2	75653.3	103440	109743	108224	94616.4	98668.1	102367	122524	105325	115963	123684	138470
1.102_257.2428			257.243	1.102						level5					4.5854e+08	4.56011e+08	4.45741e+08	4.66594e+08	4.8399e+08	4.22405e+08	4.53928e+08	4.67456e+08	4.77789e+08	4.44297e+08	4.54287e+08	6.11982e+08	6.52544e+08	6.87799e+08	4.65145e+08	8.10367e+08	6.68708e+08	5.64933e+08	8.30526e+08	7.95654e+08	6.80046e+08	6.19602e+08	5.514e+08	6.77909e+08	6.62444e+08	7.52784e+08
1.102_355.2716		C20 H37 N O4	355.272	1.102						level5					3.61992e+07	3.61992e+07	3.61992e+07	3.61992e+07	3.61992e+07	3.61992e+07	3.61992e+07	3.61992e+07	3.61992e+07	3.61992e+07	3.61992e+07	7.02293e+09	4.12985e+07	3.82697e+08	170759	2.74719e+07	122848	6.58987e+06	110498	144210	3.62778e+07	1.5846e+08	1.01751e+08	8.50641e+08	5.25963e+07	3.21307e+07
1.102_378.2428		C15 H34 N6 O3 S	378.243	1.102						level5					7.90261e+06	8.28357e+06	8.39632e+06	8.49411e+06	7.77425e+06	8.40721e+06	7.31296e+06	8.18901e+06	8.62082e+06	8.17078e+06	8.05627e+06	6.46784e+06	5.00672e+06	6.19862e+06	1.09522e+07	6.11924e+06	6.4799e+06	8.0548e+06	8.21842e+06	1.05496e+07	8.52533e+06	2.63617e+06	3.63041e+06	3.61533e+06	5.15802e+06	6.33457e+06
1.102_416.2877		C21 H40 N2 O6	416.288	1.102						level5					8.45149e+06	5.60273e+06	5.44736e+06	5.84188e+06	8.90269e+06	6.26328e+06	6.31627e+06	6.14632e+06	7.17566e+06	6.70392e+06	6.69695e+06	4.1262e+06	8.6576e+06	9.72579e+06	1.0133e+07	2.80172e+07	8.47988e+06	6.69832e+06	7.21117e+06	1.54537e+07	8.26438e+06	6.01861e+06	6.58325e+06	5.39994e+06	5.65137e+06	1.51063e+07
1.103_265.0731	Oxycinchophen	C16 H11 N O3	265.073	1.103		S9822				level4					1.76241e+06	1.98776e+06	2.02285e+06	1.91453e+06	2.03976e+06	1.94116e+06	1.89471e+06	1.84382e+06	1.89595e+06	2.08211e+06	1.92728e+06	46222.6	6.33185e+06	280725	45315.6	49877.5	1.62865e+06	1.08351e+07	4.72114e+06	1.61316e+06	3.40109e+06	63005.2	53841.6	62569.5	2.08361e+06	1.14841e+06
1.103_464.2138	Rhizocticin c	C17 H33 N6 O7 P	464.214	1.103	C17960	S30791549				level4				map00440 Phosphonate and phosphinate metabolism;	137516	156987	170702	178792	152211	163409	159075	138986	176560	158586	157352	128119	151980	127158	124631	154201	141439	155305	141231	142264	172084	172807	152344	359715	178516	182199
1.103_478.267		C21 H44 N4 O2 P2 S	478.267	1.103						level5					59881	59881	59881	59881	59881	59881	59881	59881	59881	59881	59881	973172	521918	39246.3	45404.4	63131.9	69642.8	50018	41898.1	69375.5	51941.3	65993.3	55383.3	56219.6	510478	87128.6
1.104_299.0785	Phosphopantothenic acid	C9 H18 N O8 P	299.079	1.104		S128				level4					253545	261971	246541	254497	260573	253994	254210	259517	262869	238205	262363	216958	187501	234860	238609	226222	195755	900418	147091	174989	128071	304003	123601	301868	159328	282005
1.105_229.2116			229.212	1.105						level5					4.23708e+06	4.73495e+06	4.17451e+06	4.67521e+06	5.43036e+06	3.92854e+06	4.52795e+06	4.55904e+06	4.35712e+06	4.34674e+06	5.04411e+06	3.11333e+06	1.11454e+07	1.35949e+07	1.03763e+07	1.60912e+07	7.74154e+06	1.07308e+07	7.6269e+06	8.67486e+06	5.34216e+06	2.19259e+06	5.04514e+06	3.38133e+06	3.03289e+06	1.69515e+07
1.105_400.2271		C17 H32 N6 O3 S	400.227	1.105						level5					3.8652e+06	3.8652e+06	3.8652e+06	3.8652e+06	3.8652e+06	3.8652e+06	3.8652e+06	3.8652e+06	3.8652e+06	3.8652e+06	3.8652e+06	3.13162e+06	2.46574e+06	2.41931e+06	4.92631e+06	2.90228e+06	2.8942e+06	1.95777e+06	3.17038e+06	3.23875e+06	3.32202e+06	2.26602e+06	2.23058e+06	3.128e+06	3.76909e+06	3.57731e+06
1.105_500.3124	11-deoxocucurbitacin i	C30 H44 O6	500.312	1.105	C08807	S4444701				level4	Terpenoids	Triterpenoids (C30)	Cucurbitanes	NULL	3.42166e+06	3.97663e+06	3.6222e+06	3.98067e+06	3.67816e+06	4.57319e+06	2.96924e+06	3.60584e+06	4.00455e+06	3.95745e+06	3.72869e+06	5.30909e+06	8.45004e+06	6.46992e+06	8.95906e+06	5.90498e+06	2.1129e+06	313447	445863	1.44271e+06	763104	284356	202647	6.24353e+06	279847	1.6959e+06
1.106_200.1044	(+/-)-camphoric acid	C10 H16 O4	200.104	1.106		S20198	HMDB0034491			level4	Organic acids and derivatives	Carboxylic acids and derivatives	Dicarboxylic acids and derivatives		870520	1.03192e+06	866078	894861	1.06525e+06	902567	989538	952721	877534	978197	928662	1.20852e+06	899568	564419	599019	464819	407940	628060	560676	449687	426858	4.0482e+06	3.34383e+06	1.1973e+06	685715	1.2433e+06
1.106_414.272		C21 H38 N2 O6	414.272	1.106						level5					8.32127e+06	9.87803e+06	6.98626e+06	8.1776e+06	8.73113e+06	8.40103e+06	8.50039e+06	8.17203e+06	8.56128e+06	8.18259e+06	8.52354e+06	6.31408e+06	1.40748e+07	1.54158e+07	1.71142e+07	1.02051e+07	1.34698e+07	1.37405e+07	2.45849e+07	1.52363e+07	2.17223e+07	1.4824e+07	1.82318e+07	6.43556e+06	9.41529e+06	6.30457e+06
1.107_294.2186	13(s)-hotre	C18 H30 O3	294.219	1.107	C16316	MReference-9864			86.4	level2	FA Fatty acyls	FA02 Octadecanoids	FA0200 Other Octadecanoids	map00592 alpha-Linolenic acid metabolism;	5.85158e+07	5.8195e+07	2.83637e+07	4.9668e+07	5.1605e+07	4.7225e+07	4.80699e+07	4.72547e+07	4.8972e+07	4.70917e+07	4.83006e+07	4.00852e+07	3.0189e+07	2.37402e+07	1.13912e+07	2.14207e+07	2.45074e+07	1.86067e+07	3.02192e+07	2.13052e+07	3.34492e+07	6.61652e+07	2.65289e+08	1.21916e+08	3.22472e+07	6.67522e+07
1.108_764.5201			764.52	1.108						level5					2.94375e+07	2.86073e+07	2.68238e+07	2.97986e+07	2.48143e+07	2.52639e+07	2.919e+07	3.29236e+07	3.46641e+07	3.39383e+07	1.63296e+07	2.88462e+07	3.74821e+07	4.46264e+07	2.0307e+07	4.16034e+07	3.97754e+07	1.69051e+07	6.56895e+07	6.31866e+07	5.05053e+07	3.2992e+07	1.87514e+07	3.5658e+07	4.59154e+07	3.20931e+07
1.109_267.0886		C16 H13 N O3	267.089	1.109						level5					319183	373833	286378	364989	345577	402299	329067	377142	280767	391505	323262	57608.3	1.61815e+06	70357.9	55918.8	66267.6	108736	1.35919e+06	411665	139651	420566	85982.5	68376.7	87524.9	311626	164360
1.11_329.0894	3625397	C17 H15 N O6	329.089	1.11		S8263492	HMDB0038575			level4	Phenylpropanoids and polyketides	Cinnamic acids and derivatives	Hydroxycinnamic acids and derivatives		116011	106821	116137	177173	101439	143368	115711	127003	101418	149226	115101	86916.8	65843.8	78319.5	62455.5	61893.4	61908	257331	55535.5	55826.1	60356	89473.7	62250.9	101441	72487.9	78348.4
1.111_350.0089	Apigenin 7-sulfate	C15 H10 O8 S	350.009	1.111		S24843470	HMDB0037851			level4	Phenylpropanoids and polyketides	Flavonoids	Flavones		1.53868e+06	1.7357e+06	1.6399e+06	1.50787e+06	1.48013e+06	1.46282e+06	1.62614e+06	1.41941e+06	1.79776e+06	1.43627e+06	1.64438e+06	1.93123e+06	1.36501e+06	1.18152e+06	1.06646e+06	2.48008e+06	2.51319e+06	2.89771e+06	1.89359e+06	3.37756e+06	2.70641e+06	1.53186e+06	1.65887e+06	1.16563e+06	898466	839279
1.113_380.2585		C15 H36 N6 O3 S	380.259	1.113						level5					2.11445e+06	2.11445e+06	2.11445e+06	2.11445e+06	2.11445e+06	2.11445e+06	2.11445e+06	2.11445e+06	2.11445e+06	2.11445e+06	2.11445e+06	5.13138e+06	2.7144e+06	3.54156e+06	2.74609e+06	3.16446e+06	3.22111e+06	2.37248e+06	5.03825e+06	3.81599e+06	4.17564e+06	2.49847e+06	2.39205e+06	3.01218e+06	2.72165e+06	3.26379e+06
1.113_419.3025	N-palmitoyltyrosine	C25 H41 N O4	419.303	1.113		S344800				level4					3.32882e+07	3.20877e+07	3.15745e+07	3.28269e+07	3.22052e+07	3.258e+07	3.33719e+07	3.12836e+07	3.22821e+07	3.27945e+07	3.27747e+07	3.41883e+07	3.25356e+07	4.54481e+07	4.31814e+07	5.09144e+07	3.59913e+07	3.69256e+07	2.79367e+07	2.94288e+07	2.92057e+07	6.94055e+07	5.07142e+07	2.4812e+07	3.74791e+07	3.05126e+07
1.114_442.2742		C18 H43 N4 O4 P S	442.274	1.114						level5					3.02652e+06	3.02804e+06	3.22981e+06	3.0175e+06	2.67611e+06	2.99983e+06	3.00262e+06	2.87371e+06	3.18686e+06	2.98558e+06	2.94529e+06	3.13515e+06	2.06423e+06	2.12958e+06	3.15159e+06	2.37398e+06	1.94231e+06	1.569e+06	3.38928e+06	2.67867e+06	3.58889e+06	2.20321e+06	2.94125e+06	2.55287e+06	3.73514e+06	2.87908e+06
1.114_480.3183		C26 H44 N2 O6	480.318	1.114						level5					103827	103827	103827	103827	103827	103827	103827	103827	103827	103827	103827	71454	103549	67550.7	78561.8	110193	121307	86089.8	70738.1	123467	88609.7	241407	529372	96739	110892	125205
1.115_383.3027		C22 H41 N O4	383.303	1.115						level5					1.40112e+07	1.33044e+07	1.8123e+07	1.73832e+07	1.44375e+07	1.51082e+07	1.56097e+07	1.50243e+07	1.45109e+07	1.45156e+07	1.68666e+07	1.39663e+07	1.98161e+07	2.20255e+07	1.67922e+07	2.79048e+07	1.53028e+07	1.53838e+07	4.19663e+06	1.08284e+07	1.17212e+07	2.38738e+07	5.11174e+07	6.18795e+06	1.60607e+07	1.41751e+07
1.118_278.1877	Paradol	C17 H26 O3	278.188	1.118	C10482	S85173	HMDB0030801			level4	Benzenoids	Phenols	Methoxyphenols	NULL	3.49849e+06	3.84447e+06	3.27544e+06	3.49341e+06	3.52008e+06	3.5289e+06	3.53295e+06	3.54751e+06	3.45114e+06	3.69105e+06	3.42171e+06	3.78636e+06	4.17309e+06	4.84441e+06	3.46924e+06	3.0982e+06	3.9059e+06	5.25307e+06	3.06737e+06	3.80929e+06	4.4026e+06	1.02013e+07	6.11293e+06	6.69888e+06	2.98233e+06	5.97588e+06
1.118_304.1515		C14 H24 O7	304.151	1.118						level5					5.33882e+06	5.25599e+06	5.33878e+06	5.61036e+06	5.40073e+06	6.1857e+06	4.96645e+06	4.98762e+06	5.60473e+06	5.98688e+06	5.20359e+06	6.7607e+06	7.40584e+06	1.10443e+07	1.30137e+07	2.00982e+07	3.02431e+06	2.19092e+06	2.96227e+06	2.53144e+06	2.6758e+06	1.02398e+06	4.20392e+06	4.08351e+06	718807	6.46711e+06
1.118_482.2979		C25 H42 N2 O7	482.298	1.118						level5					5.98404e+06	5.38221e+06	4.94398e+06	5.64874e+06	5.21006e+06	5.21716e+06	5.48884e+06	5.19337e+06	5.43501e+06	5.09811e+06	5.93608e+06	4.6698e+06	4.16794e+06	6.16294e+06	6.59899e+06	7.70462e+06	5.372e+06	4.70162e+06	4.87302e+06	6.52376e+06	5.37483e+06	7.93957e+06	5.6026e+06	3.00032e+06	4.73054e+06	3.53198e+06
1.12_426.2725		C17 H43 N6 P S2	426.272	1.12						level5					1.75726e+06	1.68604e+06	1.57037e+06	1.63039e+06	1.63902e+06	1.67753e+06	1.59126e+06	1.68024e+06	1.77021e+06	1.50801e+06	1.7211e+06	1.92383e+06	2.1605e+06	1.93078e+06	1.96421e+06	2.60938e+06	1.71913e+06	1.64265e+06	2.03243e+06	1.57944e+06	1.52986e+06	3.32668e+06	3.32582e+06	933829	1.70818e+06	1.4704e+06
1.121_740.5192			740.519	1.121						level5					1.43676e+07	1.43676e+07	1.43676e+07	1.43676e+07	1.43676e+07	1.43676e+07	1.43676e+07	1.43676e+07	1.43676e+07	1.43676e+07	1.43676e+07	1.67363e+07	2.15555e+07	2.94841e+07	8.58854e+06	2.91627e+07	2.30611e+07	1.0286e+07	3.18123e+07	3.16168e+07	2.33783e+07	1.82063e+07	1.87176e+07	1.6351e+07	1.8608e+07	2.63693e+07
1.121_743.5467	Dioleoylphosphatidylethanolamine	C41 H78 N O8 P	743.547	1.121		S4743651				level4					5.40585e+06	4.79104e+06	5.44354e+06	5.2163e+06	5.06359e+06	4.26376e+06	5.18885e+06	5.0617e+06	5.59416e+06	4.94099e+06	4.99287e+06	4.70425e+06	5.64163e+06	7.25163e+06	3.69124e+06	6.52381e+06	1.12677e+07	4.41723e+06	1.18797e+07	7.15522e+06	4.68436e+06	5.94198e+06	6.01947e+06	5.64907e+06	5.05207e+06	4.39071e+06
1.122_298.0945	Amlexanox	C16 H14 N2 O4	298.094	1.122		S2076	HMDB0015160			level4	Organoheterocyclic compounds	Benzopyrans	1-benzopyrans		1.27148e+06	1.20799e+06	1.28269e+06	1.41009e+06	1.39489e+06	1.36414e+06	1.20982e+06	1.37987e+06	1.27295e+06	1.30476e+06	1.32085e+06	53560.6	3.60657e+06	112373	54865.5	64523.1	836542	3.1128e+06	1.84877e+06	926399	1.49389e+06	71572	69359.8	81568.3	1.0703e+06	870122
1.122_348.2267		C16 H32 N2 O6	348.227	1.122						level5					2.98154e+06	3.27877e+06	2.98167e+06	4.12488e+06	3.50492e+06	2.80786e+06	3.28701e+06	3.13999e+06	3.29189e+06	3.38004e+06	3.38047e+06	1.92158e+06	1.86135e+06	1.385e+06	2.7511e+06	1.41176e+06	3.04625e+06	1.10255e+06	5.45391e+06	4.60669e+06	4.6686e+06	1.53613e+06	1.84759e+06	2.05922e+06	2.09044e+06	2.34012e+06
1.122_441.2866		C27 H39 N O4	441.287	1.122						level5					1.8374e+06	1.79421e+06	2.09743e+06	1.89971e+06	1.9635e+06	1.69649e+06	2.25038e+06	1.71606e+06	1.70352e+06	1.73508e+06	2.35929e+06	1.43394e+06	1.5161e+06	1.52064e+06	1.96587e+06	1.89612e+06	2.69831e+06	1.63976e+06	3.0376e+06	2.70133e+06	1.99985e+06	4.55251e+06	4.00729e+06	1.19249e+06	3.07311e+06	1.56182e+06
1.123_394.274		C20 H42 O5 S	394.274	1.123						level5					4.5902e+06	4.5902e+06	4.5902e+06	4.5902e+06	4.5902e+06	4.5902e+06	4.5902e+06	4.5902e+06	4.5902e+06	4.5902e+06	4.5902e+06	2.63589e+06	5.7043e+06	571889	1.60764e+06	1.16771e+07	5.73295e+06	3.36238e+06	150524	182594	146234	835731	437750	152560	3.69088e+06	9.27919e+06
1.123_415.3107		C23 H45 N O3 S	415.311	1.123						level5					98757.3	119266	107099	99935.9	110144	108651	104308	101874	102867	116578	106190	100593	97562.2	105617	100766	105382	112792	124664	95291.5	99806.2	114776	143685	724883	126944	151584	132252
1.123_431.1358	Tiodazosin	C18 H21 N7 O4 S	431.136	1.123		S54869				level4					933760	818636	880066	984924	796534	920179	985425	844725	825562	835817	989212	94319	1.5041e+06	93072.7	84441.1	84016.9	705726	6.13865e+06	3.818e+06	826699	1.39637e+06	121932	87645.3	113276	639812	358963
1.123_737.5271		C38 H81 N3 O2 P2 S2	737.527	1.123						level5					101802	122687	123148	102323	112498	107577	113868	103480	107176	122576	112681	102483	107034	106121	100063	103473	109794	125977	95451.2	103065	115735	143103	120012	127917	150144	129043
1.124_437.2961		C27 H40 N3 P	437.296	1.124						level5					63222.3	63222.3	63222.3	63222.3	63222.3	63222.3	63222.3	63222.3	63222.3	63222.3	63222.3	58915.2	68588.1	60119.4	58206.3	67696.3	72758.7	71700	59039.3	61587.5	76510.7	75273.7	102481	76049.8	101737	82480.5
1.127_390.2721		C19 H38 N2 O6	390.272	1.127						level5					8.11495e+06	7.60888e+06	7.96062e+06	7.98978e+06	7.80719e+06	6.98427e+06	6.67731e+06	1.12464e+07	7.2747e+06	7.30534e+06	7.21247e+06	7.38682e+06	1.30287e+07	1.03106e+07	1.31938e+07	1.18945e+07	1.07364e+07	1.61376e+07	1.98385e+07	1.18948e+07	1.03581e+07	1.2528e+07	1.41744e+07	6.34271e+06	8.23804e+06	8.78329e+06
1.127_476.29		C24 H45 O7 P	476.29	1.127						level5					96398.1	115861	103525	149776	105382	97821	89902.3	157023	96004.2	104463	111907	79093.2	84828.9	84508.6	79867.6	93329.8	97439.2	116739	77104.3	92015.3	99973.8	130831	102428	118217	130753	101524
1.128_330.2457		C16 H34 N4 O S	330.246	1.128						level5					2.74194e+06	1.88791e+06	2.59111e+06	2.11454e+06	2.59069e+06	2.3606e+06	2.36276e+06	2.41284e+06	2.33609e+06	2.1746e+06	2.53801e+06	3.04256e+06	2.50471e+06	2.00922e+06	4.22335e+06	2.26848e+06	1.37662e+06	433320	1.88645e+06	2.51506e+06	1.72688e+06	3.54121e+06	3.0849e+06	3.57083e+06	6.09014e+06	2.59819e+06
1.128_446.2982		C22 H42 N2 O7	446.298	1.128						level5					5.20182e+06	4.9464e+06	4.66869e+06	5.22998e+06	4.42656e+06	4.62904e+06	5.08709e+06	4.59027e+06	5.0303e+06	4.60351e+06	5.23497e+06	4.38728e+06	5.53311e+06	5.80245e+06	5.96422e+06	7.60266e+06	5.68311e+06	4.76609e+06	7.86605e+06	5.91779e+06	4.59312e+06	6.19672e+06	8.1733e+06	1.98239e+06	4.31042e+06	3.69189e+06
1.129_433.2639		C19 H40 N5 O2 P S	433.264	1.129						level5					67138.5	74954	70743.6	73286.2	67949	67587.8	90651.2	60686.6	83170.8	59113.2	75082.2	64482.4	64341.8	58599.6	57783.9	68280.3	66910.1	80802.7	46195.9	57163.4	56389.4	82884.5	87854.1	109037	77964.6	81847.2
1.129_768.5512		C39 H82 N2 O8 P2	768.551	1.129						level5					9.04348e+06	8.35403e+06	8.64744e+06	9.3042e+06	9.51656e+06	1.03127e+07	9.43728e+06	5.53829e+06	1.01102e+07	1.01746e+07	1.02713e+07	1.19591e+07	1.31588e+07	1.73788e+07	6.68662e+06	1.35604e+07	1.61749e+07	7.46363e+06	3.34331e+07	2.33078e+07	2.57723e+07	1.32039e+07	1.34446e+07	1.37538e+07	1.70101e+07	9.43449e+06
1.13_634.4961		C38 H62 N6 O2	634.496	1.13						level5					91719.7	91719.7	91719.7	91719.7	91719.7	91719.7	91719.7	91719.7	91719.7	91719.7	91719.7	85668.9	84910.3	89814.4	85783.2	90880.2	87879.7	106016	91955.6	81471.6	116574	112042	287015	113106	308410	102178
1.131_374.241		C18 H34 N2 O6	374.241	1.131						level5					116226	116226	116226	116226	116226	116226	116226	116226	116226	116226	116226	188157	123065	89221.7	108015	131707	86524.6	212338	15505.9	193646	97021.1	352738	53806	226722	36179.4	74902.6
1.131_454.267		C25 H45 O P3	454.267	1.131						level5					60350.4	58150.2	64241.8	64563.7	62335.7	65576.4	59173.4	65192.8	63319.3	54996.3	66133	59457.4	64692.2	55426.4	55779.5	67268.1	67963.2	62485	555484	62036.6	60268.9	69505.9	74805.6	80812.8	82065.2	65797.6
1.132_243.0561		C12 H10 N3 O P	243.056	1.132						level5					589216	506719	523811	537697	645802	546014	480188	606039	505442	477583	687778	138950	342902	358545	144224	173769	2.41086e+06	396374	2.21705e+06	2.50476e+06	997979	220473	174822	735345	241748	248664
1.132_376.2564		C18 H36 N2 O6	376.256	1.132						level5					621779	656599	722436	682960	587263	994350	569532	703075	512314	1.15317e+06	497986	5.05019e+06	1.72331e+06	823409	199550	968288	507761	764471	816859	562880	757587	1.61841e+06	3.3425e+06	1.71639e+06	2.80756e+06	639596
1.135_359.2453	Napelline	C22 H33 N O3	359.245	1.135	C08700	S10219104				level4	Alkaloids	Alkaloids derived by amination reactions	Terpenoid alkaloids	NULL	1.49576e+06	1.47638e+06	1.7698e+06	1.57879e+06	1.56107e+06	1.49387e+06	1.58698e+06	1.57204e+06	1.67887e+06	1.3919e+06	1.63782e+06	1.75524e+06	1.62697e+06	1.5385e+06	1.82813e+06	3.82958e+06	1.65531e+06	2.26832e+06	1.35181e+06	1.45141e+06	1.05053e+06	1.54538e+06	3.29558e+06	586722	1.25458e+06	1.96657e+06
1.138_389.2161		C21 H33 N3 P2	389.216	1.138						level5					185530	202261	236639	168325	238182	208244	198725	176779	209117	248954	184608	201666	76250.9	66269.5	227205	91513.9	103081	140869	187651	135109	219460	53368.3	67777.1	69139.5	74304.1	79492.9
1.139_492.2822		C26 H40 N2 O7	492.282	1.139						level5					1.29156e+06	1.19734e+06	1.31115e+06	1.26648e+06	1.25575e+06	1.26361e+06	1.26408e+06	1.2629e+06	1.26251e+06	1.27043e+06	1.25946e+06	1.12912e+06	2.17101e+06	1.63407e+06	2.50118e+06	2.63977e+06	1.57161e+06	1.71277e+06	2.33745e+06	1.76239e+06	1.55419e+06	3.5154e+06	3.2727e+06	524939	1.36176e+06	1.27675e+06
1.14_372.2266		C20 H37 O2 P S	372.227	1.14						level5					834697	1.08171e+06	1.18924e+06	699108	1.26124e+06	963851	1.06812e+06	922894	1.00092e+06	920500	1.05611e+06	1.06373e+06	463899	602838	810678	594566	720216	519463	1.32069e+06	505663	1.13506e+06	574363	611182	722146	1.04627e+06	626562
1.14_399.1461	S-(5'-adenosyl)-l-methionine conjugate acid	C15 H23 N6 O5 S	399.146	1.14		S31983	HMDB0001185			level4	Nucleosides, nucleotides, and analogues	5'-deoxyribonucleosides	5'-deoxy-5'-thionucleosides		5.04905e+06	4.78752e+06	5.32817e+06	5.71772e+06	4.66995e+06	5.12998e+06	5.08577e+06	5.00384e+06	4.71244e+06	5.28019e+06	5.36983e+06	93947.1	1.17945e+07	454206	93351.9	115434	5.1222e+06	5.78479e+07	1.53897e+07	5.08014e+06	1.33654e+07	132363	132306	130935	6.08642e+06	3.36918e+06
1.141_251.0933	Cycloguanil	C11 H14 Cl N5	251.093	1.141		S8697	HMDB0060974			level4	Organoheterocyclic compounds	Triazines	Aminotriazines		232080	234748	275754	255420	306081	293249	279303	221785	231872	214269	376106	91825.2	1.36185e+06	101020	97728.4	116901	193012	3.35358e+06	859473	269658	1.01031e+06	126946	131676	126824	293164	129412
1.142_336.0296		C8 H12 N6 O5 S2	336.03	1.142						level5					1.28796e+06	1.27942e+06	1.29031e+06	1.35443e+06	1.24476e+06	1.29256e+06	1.27868e+06	1.31224e+06	1.50052e+06	1.19221e+06	1.204e+06	1.55586e+06	1.57584e+06	1.38594e+06	714515	1.23326e+06	1.18632e+06	183203	2.50933e+06	1.34165e+06	1.78618e+06	116541	1.82953e+06	2.61611e+06	988227	1.98655e+06
1.142_418.2902	(3r,5z)-5-[(2e)-2-{(1r,3as,7ar)-1-[(2r)-6-hydroxy-6-methyl-2-heptanyl]-7a-methyloctahydro-4h-inden-4-ylidene}ethylidene]-4-methylenetetrahydro-2h-thiopyran-3-ol	C26 H42 O2 S	418.29	1.142		S7826242				level4					1.77046e+06	1.47769e+06	1.58407e+06	1.65201e+06	1.68737e+06	1.67765e+06	1.63555e+06	1.67202e+06	1.688e+06	1.57959e+06	1.60477e+06	1.52115e+06	995582	1.66115e+06	2.35317e+06	3.12269e+06	1.94347e+06	1.39557e+06	169900	1.108e+06	1.08392e+06	863889	916288	719491	1.20874e+06	2.62021e+06
1.143_183.0021		C4 H9 N O3 S2	183.002	1.143						level5					3.5628e+06	3.82253e+06	3.81455e+06	3.55701e+06	3.60774e+06	3.68982e+06	3.74374e+06	3.75684e+06	3.38487e+06	3.84582e+06	3.70202e+06	3.53096e+06	1.33869e+06	6.54736e+06	4.84261e+06	7.14995e+06	3.37598e+06	3.13322e+06	2.17141e+06	2.96422e+06	1.25043e+06	1.22854e+07	6.59756e+06	3.00159e+06	1.43267e+06	2.45258e+06
1.143_326.2086	Mfcd03411993	C18 H30 O5	326.209	1.143	C14794	S7827804				level4	FA Fatty acyls	FA03 Eicosanoids	FA0301 Prostaglandins	map00590 Arachidonic acid metabolism;	1.7806e+06	1.7426e+06	1.70198e+06	1.88167e+06	1.5828e+06	1.85414e+06	1.79984e+06	1.70927e+06	1.72687e+06	1.65299e+06	1.85833e+06	3.47351e+06	1.52385e+06	2.32445e+06	2.66771e+06	2.14293e+06	1.9344e+06	1.53679e+06	1.49277e+06	1.65009e+06	847302	2.2579e+06	2.10913e+06	2.5743e+06	2.35562e+06	1.74607e+06
1.143_341.292	1801426	C20 H39 N O3	341.292	1.143		S85785	HMDB0013308			level4	Organic acids and derivatives	Carboxylic acids and derivatives	Amino acids, peptides, and analogues		6.01761e+06	5.99458e+06	5.21305e+06	5.70386e+06	6.33773e+06	5.88609e+06	5.9817e+06	5.84284e+06	5.55733e+06	5.96998e+06	5.9317e+06	1.11635e+07	1.23386e+07	1.38779e+07	8.1836e+06	1.13913e+07	6.11069e+06	3.92311e+06	1.08153e+07	5.95527e+06	7.61845e+06	2.38662e+07	1.91756e+07	5.73992e+06	1.23116e+07	4.86033e+06
1.143_413.2952		C23 H43 N O3 S	413.295	1.143						level5					88903.3	81293	89234	82828.9	86045.8	86105.2	86678	82826.5	92265.1	75774.2	92071.2	76389.6	41004.8	73228.4	34346	106725	48976	100930	61288.5	39469.2	63325.8	54266.8	1.42322e+06	92034.2	742364	37540
1.143_425.2405		C26 H37 N P2	425.24	1.143						level5					1.13249e+06	791809	1.32392e+06	1.03151e+06	1.05349e+06	1.05264e+06	1.10008e+06	1.07571e+06	992636	1.10852e+06	1.01832e+06	1.94099e+06	1.27129e+06	937424	483378	897312	1.07742e+06	804218	878289	92566.5	996476	1.87824e+06	607735	3.22573e+06	1.21667e+06	1.96654e+06
1.143_530.2975		C29 H42 N2 O7	530.298	1.143						level5					1.41112e+06	1.31578e+06	1.60485e+06	1.50178e+06	1.3004e+06	1.42335e+06	1.42483e+06	1.45117e+06	1.32262e+06	1.50817e+06	1.41582e+06	1.37827e+06	975926	2.68805e+06	5.05597e+06	2.12176e+06	1.13303e+06	1.91354e+06	2.47046e+06	2.20495e+06	1.00327e+06	2.61789e+06	1.61798e+06	1.08677e+06	641849	1.24797e+06
1.145_417.2869		C25 H39 N O4	417.287	1.145						level5					7.34911e+06	6.13756e+06	6.33275e+06	7.32173e+06	5.92402e+06	6.36603e+06	6.03366e+06	6.97228e+06	7.57268e+06	5.90956e+06	6.36656e+06	5.8198e+06	5.53182e+06	7.12193e+06	7.75786e+06	1.70899e+07	8.67261e+06	8.56998e+06	3.92995e+06	6.43409e+06	6.31036e+06	4.19639e+06	3.637e+06	4.23348e+06	5.08078e+06	1.00553e+07
1.145_462.1417		C20 H32 O6 P2 S	462.142	1.145						level5					152321	163028	196512	185903	171465	148707	174596	144605	195052	144199	203457	22520.1	400990	24675.5	27855.5	34068.5	163995	1.962e+06	1.25816e+06	209808	972936	38808.6	61746.9	36671.9	64469.5	77906
1.148_480.2827		C26 H36 N6 O3	480.283	1.148						level5					894771	1.28311e+06	1.06464e+06	1.12973e+06	953287	1.17314e+06	1.07925e+06	1.12153e+06	914286	1.03093e+06	1.18939e+06	1.19928e+06	720812	1.02392e+06	1.11288e+06	1.7759e+06	1.18929e+06	628514	4.6892e+06	1.00242e+06	914223	383477	350540	542211	679347	974311
1.149_357.287		C20 H39 N O4	357.287	1.149						level5					6.88108e+07	6.88108e+07	6.88108e+07	6.88108e+07	6.88108e+07	6.88108e+07	6.88108e+07	6.88108e+07	6.88108e+07	6.88108e+07	6.88108e+07	9.29583e+07	8.63453e+07	1.30659e+08	1.24454e+08	1.17227e+08	7.69839e+07	8.15833e+07	1.01308e+07	9.15653e+07	6.2228e+07	1.4219e+08	1.52101e+08	5.91224e+07	9.07541e+07	7.03811e+07
1.15_427.3074		C21 H42 N5 O2 P	427.307	1.15						level5					53116.9	101270	81875.1	40008.9	83569.1	73891.7	68488.3	61796.3	57608.8	77667.3	76566.5	31898.7	57491.1	22332.4	39099.9	25578.6	30996.1	36777.6	32131.4	32423	39623.3	288951	1.58002e+06	40755.7	434893	30440.3
1.153_298.25	Ricinelaidic acid	C18 H34 O3	298.25	1.153		S393218				level4					1.16031e+08	1.16031e+08	1.16031e+08	1.16031e+08	1.16031e+08	1.16031e+08	1.16031e+08	1.16031e+08	1.16031e+08	1.16031e+08	1.16031e+08	3.6552e+08	1.12945e+08	1.04518e+08	1.01324e+08	6.72316e+07	2.40113e+08	1.11839e+08	1.06779e+08	1.91767e+08	8.35735e+07	5.07481e+08	5.00268e+07	5.48027e+08	1.36452e+08	2.70086e+08
1.153_420.2822		C20 H40 N2 O7	420.282	1.153						level5					1.59993e+07	1.69941e+07	1.58767e+07	1.48109e+07	1.63826e+07	1.44082e+07	1.63082e+07	1.56142e+07	1.58129e+07	1.54976e+07	1.66707e+07	1.90809e+07	1.72864e+07	1.78998e+07	1.59764e+07	2.1879e+07	1.55898e+07	1.78556e+07	2.12035e+07	2.11715e+07	1.72652e+07	1.76096e+07	2.05708e+07	1.01664e+07	1.6947e+07	1.69691e+07
1.154_152.047	4-hydroxyphenylacetic acid	C8 H8 O3	152.047	1.154	C00642	MReference-238	HMDB0000020	64	84.3	level2	Benzenoids	Phenols	1-hydroxy-2-unsubstituted benzenoids	map00350 Tyrosine metabolism; map00360 Phenylalanine metabolism; map01100 Metabolic pathways;	9.9436e+07	9.85268e+07	9.10099e+07	1.01565e+08	9.47806e+07	9.7888e+07	9.7339e+07	9.6776e+07	9.64046e+07	9.77435e+07	9.73011e+07	241638	2.81502e+08	5.22794e+07	117659	147568	7.01012e+07	2.39291e+08	1.25144e+08	6.56335e+07	1.33417e+08	833412	206625	1.30496e+07	1.62297e+08	5.2198e+07
1.154_444.2824		C16 H41 N6 O6 P	444.282	1.154						level5					3.31873e+06	3.21579e+06	5.03286e+06	3.62677e+06	3.45854e+06	3.45487e+06	3.69029e+06	3.65258e+06	3.20408e+06	3.75451e+06	4.03047e+06	4.24008e+06	4.93239e+06	2.62309e+06	1.88738e+06	3.91348e+06	3.88001e+06	3.32739e+06	50958.1	4.44603e+06	4.2597e+06	1.22101e+07	1.07852e+07	2.37909e+06	5.51662e+06	2.78189e+06
1.155_325.2607		C19 H35 N O3	325.261	1.155						level5					5.71388e+06	4.9783e+06	5.19837e+06	5.98297e+06	5.02322e+06	5.09552e+06	5.45803e+06	5.23447e+06	5.26075e+06	5.17563e+06	5.70263e+06	3.87089e+06	6.84397e+06	7.20545e+06	1.21267e+07	1.24743e+07	8.46293e+06	7.78021e+06	6.03069e+06	7.95155e+06	5.02462e+06	1.87178e+06	4.13768e+06	2.12058e+06	3.99813e+06	7.77996e+06
1.155_339.2765	Mfcd01320532	C20 H37 N O3	339.276	1.155		S4941514	HMDB0013631			level4	Organic acids and derivatives	Carboxylic acids and derivatives	Amino acids, peptides, and analogues		4.06663e+07	4.06663e+07	4.06663e+07	4.06663e+07	4.06663e+07	4.06663e+07	4.06663e+07	4.06663e+07	4.06663e+07	4.06663e+07	4.06663e+07	4.0906e+07	4.84334e+07	5.33584e+07	5.98067e+07	7.24255e+07	4.334e+07	4.68391e+07	9.43087e+06	3.77342e+07	2.88254e+07	4.60608e+07	6.9426e+07	2.32621e+07	3.92934e+07	4.20844e+07
1.155_402.272		C20 H38 N2 O6	402.272	1.155						level5					1.23691e+07	1.34685e+07	1.21732e+07	1.17482e+07	1.19515e+07	1.11615e+07	1.28189e+07	1.21185e+07	1.24139e+07	1.16171e+07	1.29029e+07	1.38392e+07	1.40542e+07	1.5278e+07	1.29848e+07	1.85487e+07	1.35762e+07	1.45134e+07	1.43763e+07	1.68825e+07	1.25578e+07	1.17422e+07	1.37151e+07	7.31064e+06	1.20579e+07	1.3098e+07
1.155_474.2743		C28 H45 P3	474.274	1.155						level5					49529.1	49674.6	49693.3	47686	49757.6	49841.1	49241.1	46104.4	60663.3	42325.8	49762.8	40557.9	39341.4	24401.5	19595.6	23962.4	73569.4	40906.7	60940.4	20031.7	209709	160010	799910	47084.6	352427	40081.1
1.156_432.2827		C23 H47 O P3	432.283	1.156						level5					53328.1	53568.1	57286.2	54089.7	55079.9	56455.4	54242.1	50141.5	62399.4	52565.1	53943.7	59072.4	69725.4	51298.6	46795.6	86918.1	64585.7	70063.6	52319.5	45842.8	52525.6	79695.2	74953.2	89460.5	91909.9	70607.7
1.157_242.1261		C11 H18 N2 O4	242.126	1.157						level5					6.58202e+06	6.50101e+06	6.38217e+06	6.46494e+06	6.9266e+06	6.13092e+06	6.00698e+06	7.78012e+06	5.03305e+06	7.34937e+06	6.67902e+06	4.65669e+06	3.8454e+06	8.68688e+06	7.28482e+06	9.2964e+06	4.834e+06	7.08409e+06	3.9137e+06	3.52846e+06	2.5137e+06	5.2511e+06	1.11671e+07	6.05497e+06	7.23307e+06	8.43463e+06
1.157_468.2823		C24 H40 N2 O7	468.282	1.157						level5					2.37573e+06	2.45961e+06	2.29415e+06	2.54006e+06	2.3464e+06	2.39866e+06	2.40172e+06	2.40505e+06	2.3488e+06	2.49068e+06	2.36311e+06	1.65731e+06	3.48017e+06	2.24873e+06	5.37518e+06	3.49394e+06	2.85725e+06	2.53274e+06	4.25522e+06	3.52818e+06	3.05226e+06	4.30717e+06	8.95531e+06	797892	2.27686e+06	2.77199e+06
1.158_404.2877			404.288	1.158						level5					1.00232e+07	9.77251e+06	9.89563e+06	1.01021e+07	9.86322e+06	9.9275e+06	9.93003e+06	9.95701e+06	9.79024e+06	1.01041e+07	9.87414e+06	9.86464e+06	1.74155e+07	1.49258e+07	2.06382e+07	1.83386e+07	9.96943e+06	1.32064e+07	2.37598e+07	1.01039e+07	9.98295e+06	1.06101e+07	4.61089e+07	6.74977e+06	1.45111e+07	1.10956e+07
1.159_338.2447	11-deoxy-pge1	C20 H34 O4	338.245	1.159		S4446182				level4					1.3602e+08	1.12174e+08	1.49973e+08	1.27661e+08	1.30006e+08	1.60384e+08	1.26255e+08	1.15992e+08	1.64259e+08	1.32732e+08	1.19104e+08	1.45444e+08	1.30036e+08	7.95847e+07	1.0209e+08	7.98997e+07	1.3979e+08	1.04681e+08	1.84391e+08	8.01604e+07	2.44899e+08	2.5739e+08	3.67729e+08	6.85022e+07	5.27438e+07	2.13263e+08
1.16_407.2294		C16 H34 N5 O5 P	407.229	1.16						level5					1.52218e+06	1.71906e+06	803528	1.76706e+06	1.89869e+06	1.35596e+06	1.12842e+06	2.01932e+06	1.44124e+06	1.25154e+06	1.46238e+06	2.09682e+06	1.90102e+06	800854	1.53281e+06	837101	2.39796e+06	2.79163e+06	5.33239e+06	1.3504e+06	1.4241e+06	1.82908e+06	1.29321e+06	4.64189e+06	2.32675e+06	2.5334e+06
1.162_321.2376		C13 H31 N5 O4	321.238	1.162						level5					3.56901e+07	3.34881e+07	3.43118e+07	3.33886e+07	3.69357e+07	3.37032e+07	3.47178e+07	3.33248e+07	3.38326e+07	3.71686e+07	3.41754e+07	4.37062e+07	1.73152e+07	2.17651e+07	1.88666e+07	1.01622e+07	3.35106e+07	3.5205e+07	3.24616e+07	2.22074e+07	5.38124e+07	5.5859e+07	7.58594e+07	6.24513e+07	3.28336e+07	6.52115e+07
1.163_458.3337		C28 H46 N2 O S	458.334	1.163						level5					46048.1	45383.5	48855.4	44271.8	46351.5	46211.2	46227	46264	45734.7	45954.7	46669.8	60844.9	40504.3	43521.2	103264	45433.8	49064.1	63970	50647.2	41850.7	52016.7	67249.9	158222	81762	88828.2	57604.9
1.165_448.2562		C18 H37 N6 O5 P	448.256	1.165						level5					3.20231e+06	3.20329e+06	3.12866e+06	3.28427e+06	3.16231e+06	3.19547e+06	3.19587e+06	3.20058e+06	3.15405e+06	3.25731e+06	3.17199e+06	2.57873e+06	5.16773e+06	4.01848e+06	7.83035e+06	5.8785e+06	3.98416e+06	6.20227e+06	7.27263e+06	4.84472e+06	4.9854e+06	4.40495e+06	6.18271e+06	1.57102e+06	2.62637e+06	4.52652e+06
1.166_334.1157		C18 H25 P3	334.116	1.166						level5					477616	431640	447822	481722	527317	442313	464316	503616	438141	476099	467760	18607.5	1.33041e+06	23065.3	25874.2	35593.6	733193	2.12273e+06	2.61394e+06	1.01621e+06	1.03909e+06	36898.6	40870.4	34869.5	171218	327541
1.166_411.2796		C17 H42 N5 O2 P S	411.28	1.166						level5					68544.5	41463.4	93623.2	47704.6	58773.2	61447.9	61551.8	51936.7	73245.3	47368.2	68171.1	45365.7	52710.8	29809.2	50222.8	89989.9	72535.1	51365.5	66194.7	87433.4	87023.4	181464	729821	66169.6	2.28768e+06	46304.3
1.168_271.12	7,8-didehydro-4,5-epoxymorphinan-3,6-diol	C16 H17 N O3	271.12	1.168		S380506				level4					3.34878e+06	3.34878e+06	3.34878e+06	3.34878e+06	3.34878e+06	3.34878e+06	3.34878e+06	3.34878e+06	3.34878e+06	3.34878e+06	3.34878e+06	23581.9	8.49843e+06	411286	24621.3	32377.6	4.39873e+06	1.86449e+07	6.88563e+06	4.59383e+06	4.8795e+06	36027.9	34586.1	38962.8	2.43967e+06	2.17909e+06
1.17_130.0628	3-methyl-2-oxovaleric acid	C6 H10 O3	130.063	1.17	C03465	BGI104	HMDB0000491	37.4		level3	Organic acids and derivatives	Keto acids and derivatives	Short-chain keto acids and derivatives	NULL	3.71413e+06	4.01741e+06	3.92471e+06	4.65078e+06	3.66129e+06	4.11966e+06	3.91644e+06	3.99881e+06	4.11614e+06	3.76405e+06	4.07177e+06	1.79023e+06	1.79979e+07	1.7328e+06	1.12405e+06	387905	2.00826e+06	5.86516e+06	6.16823e+06	2.76802e+06	1.57733e+07	419111	866101	4.1982e+06	4.16142e+06	3.51557e+06
1.172_395.3388		C24 H45 N O3	395.339	1.172						level5					44615.4	35333.2	28991.5	34560.6	31825	43558.5	43389.3	28273.2	43053.1	22057.7	51369.3	25533.2	14329.6	24940.7	17315.9	45219.3	22052.7	29399	21025.9	17912.2	20753.4	107687	200067	33056.6	109254	21487.4
1.172_563.3217		C26 H49 N3 O8 S	563.322	1.172						level5					492581	660856	484695	569229	599232	547774	524821	566084	552325	548157	567005	83300.5	756344	1.06577e+06	245519	1.31368e+06	955160	286851	475239	1.13942e+06	393647	4.08416e+06	1.30871e+06	238703	1.76175e+06	462377
1.174_584.4792		C38 H64 O4	584.479	1.174						level5					57627.2	57627.2	57627.2	57627.2	57627.2	57627.2	57627.2	57627.2	57627.2	57627.2	57627.2	19755.5	13007.9	5656.83	7526.75	19214.3	34693.5	11915.4	6188.42	19235.2	30270.7	13412.9	45629.6	9164.89	146065	59594.4
1.174_927.5956			927.596	1.174						level5					1.3049e+06	1.27158e+06	1.1943e+06	1.22352e+06	1.44001e+06	1.07666e+06	1.28721e+06	1.22646e+06	1.36886e+06	1.27682e+06	1.21817e+06	1.01241e+06	1.39554e+06	1.77683e+06	1.37486e+06	1.32109e+06	1.43884e+06	1.39116e+06	1.45466e+06	2.22882e+06	1.25022e+06	1.58149e+06	1.46272e+06	1.04378e+06	1.2503e+06	1.43034e+06
1.175_940.5587		C57 H81 O9 P	940.559	1.175						level5					4.05594e+06	3.26316e+06	3.71876e+06	3.80583e+06	3.83096e+06	2.74988e+06	3.71199e+06	3.94518e+06	4.09688e+06	3.5537e+06	3.26071e+06	2.92554e+06	3.1498e+06	3.24162e+06	4.66513e+06	3.55053e+06	3.94293e+06	2.2976e+06	7.55891e+06	6.59039e+06	5.3107e+06	3.04821e+06	3.60362e+06	3.12181e+06	1.99415e+06	3.90545e+06
1.176_383.3393		C23 H45 N O3	383.339	1.176						level5					22123.4	22565.5	24997.5	23214.3	22278.7	23129	22279.3	24565.6	20997.8	22402.5	24616.3	21133	21808.4	20283.6	18362.6	22210.8	21871.2	23371	21440.9	20524.3	24644.7	36682.3	73291.2	31959.8	34854.8	29385.2
1.178_310.2136	13(s)-hpotre	C18 H30 O4	310.214	1.178	C04785	S4593698				level4	FA Fatty acyls	FA01 Fatty Acids and Conjugates	FA0104 Hydroperoxy fatty acids	map00592 alpha-Linolenic acid metabolism; map01100 Metabolic pathways;	4.22579e+06	5.24e+06	5.01787e+06	3.09341e+06	5.22748e+06	4.11677e+06	4.45078e+06	4.37889e+06	4.94545e+06	4.29641e+06	4.29574e+06	724273	1.41869e+06	1.54947e+06	2.59767e+06	2.32466e+06	1.33063e+06	905260	1.87908e+06	2.00954e+06	1.71269e+06	2.35566e+06	1.89303e+07	3.80347e+06	1.08728e+06	5.92893e+06
1.178_923.5692		C57 H82 N O5 P S	923.569	1.178						level5					4.2182e+07	4.2182e+07	4.2182e+07	4.2182e+07	4.2182e+07	4.2182e+07	4.2182e+07	4.2182e+07	4.2182e+07	4.2182e+07	4.2182e+07	3.53054e+07	5.00609e+07	7.17344e+07	7.62407e+07	5.59547e+07	4.42486e+07	4.42611e+07	4.79904e+07	6.10634e+07	4.61245e+07	6.56602e+07	4.13628e+07	6.48658e+07	3.82649e+07	5.42406e+07
1.179_168.9864		C3 H7 N O3 S2	168.986	1.179						level5					1.21701e+06	1.11829e+06	1.17657e+06	1.30422e+06	1.12099e+06	1.18425e+06	1.19064e+06	1.24872e+06	1.16583e+06	1.17957e+06	1.1607e+06	1.40957e+06	1.54649e+06	778089	2.14811e+06	504982	767341	654375	761895	787851	762131	1.06772e+06	1.5854e+06	1.3262e+06	1.5083e+06	531477
1.18_297.2377			297.238	1.18						level5					7.10434e+06	7.75256e+06	6.94135e+06	6.42573e+06	7.31467e+06	7.14302e+06	7.03785e+06	7.43409e+06	7.09313e+06	6.99812e+06	7.00028e+06	1.19519e+07	6.01914e+06	1.8527e+06	2.7663e+06	2.06433e+06	2.50984e+06	7.23893e+06	9.41665e+06	2.21639e+06	6.1265e+06	3.16317e+07	2.61448e+07	3.16701e+07	3.52142e+06	1.95345e+07
1.182_170.0939	2-(diethoxymethyl)furan	C9 H14 O3	170.094	1.182	C14280	S75385				level4				NULL	1.02338e+06	1.02514e+06	1.02115e+06	1.02556e+06	1.02319e+06	1.02368e+06	1.02368e+06	1.02377e+06	1.02332e+06	1.02402e+06	1.02361e+06	1.21769e+06	904289	762393	1.21638e+06	1.53884e+06	1.05981e+06	632087	1.2016e+06	1.11908e+06	1.17696e+06	1.60528e+06	1.68475e+06	1.30643e+06	1.08506e+06	1.42342e+06
1.182_562.4954		C37 H62 N4	562.495	1.182						level5					66553.1	66553.1	66553.1	66553.1	66553.1	66553.1	66553.1	66553.1	66553.1	66553.1	66553.1	43423.7	6010.59	102856	16835	37414.2	21260.9	74057.1	52173.7	10485.9	69411.5	27759.5	87440.6	53026	227279	44567.8
1.185_456.3183		C28 H44 N2 O S	456.318	1.185						level5					34821.4	27080	32702.1	30978.7	29606.4	39307.9	28545.3	28686.6	47934.7	25727.9	28152.7	24371.5	25308.5	23830.9	25093.5	24178.3	26739.1	28442.1	25247.4	25879.1	27584.3	35959.7	164667	41595.3	161851	30922.5
1.189_400.2562		C20 H36 N2 O6	400.256	1.189						level5					8.04929e+06	8.01158e+06	8.07006e+06	8.47076e+06	9.26498e+06	8.19821e+06	8.37037e+06	8.80772e+06	7.48864e+06	8.68651e+06	8.39684e+06	1.15462e+07	8.84768e+06	3.8389e+06	8.44296e+06	6.30422e+06	6.41514e+06	7.86947e+06	9.99827e+06	8.03631e+06	9.02316e+06	7.31048e+06	1.32199e+07	7.89117e+06	1.01974e+07	9.92942e+06
1.19_420.282		C20 H40 N2 O7	420.282	1.19						level5					3.21868e+06	3.01707e+06	3.46101e+06	2.74775e+06	4.46581e+06	3.2934e+06	3.41963e+06	3.24058e+06	3.1135e+06	3.45763e+06	3.38267e+06	6.80202e+06	3.25794e+06	2.4713e+06	3.02981e+06	3.44218e+06	2.12008e+06	3.18451e+06	6.1366e+06	3.98818e+06	4.28109e+06	6.0034e+06	6.29089e+06	2.92891e+06	4.49491e+06	3.84778e+06
1.191_226.0835	Genipin	C11 H14 O5	226.083	1.191	C09780	S390864	HMDB0035830			level4	Terpenoids	Monoterpenoids (C10)	Iridoids	NULL	1.95352e+06	1.68322e+06	1.88038e+06	1.87747e+06	2.0325e+06	1.71125e+06	1.87958e+06	1.90076e+06	1.87631e+06	1.81855e+06	1.88997e+06	42490.6	2.23137e+06	707900	50807.7	50175.9	953175	7.80025e+06	5.68016e+06	1.1713e+06	3.01261e+06	71872.5	82548.3	921084	4.11721e+06	895267
1.193_136.0522	4-toluic acid	C8 H8 O2	136.052	1.193	C01454	MReference-1497	HMDB0029635	35.5	76.4	level2	Benzenoids	Benzene and substituted derivatives	Benzoic acids and derivatives	map01100 Metabolic pathways;	7.94365e+06	7.02382e+06	8.01228e+06	7.75517e+06	7.99288e+06	7.60315e+06	7.66581e+06	8.02118e+06	7.50385e+06	7.67856e+06	7.75139e+06	25034.5	9.39128e+06	3.10867e+06	24457.1	46004.3	4.59313e+06	2.5882e+07	1.88746e+07	5.31811e+06	1.05871e+07	34153.2	35470.6	4.00108e+06	1.55038e+07	3.98606e+06
1.195_343.2534		C19 H37 N O2 S	343.253	1.195						level5					527147	527147	527147	527147	527147	527147	527147	527147	527147	527147	527147	534676	2.29356e+06	828156	811894	1.31829e+06	1.32148e+06	1.73882e+06	123915	371945	77114.2	311766	568162	828969	75411.3	2.98936e+06
1.195_861.5903		C41 H90 N3 O9 P3	861.59	1.195						level5					433389	412049	399559	359544	459843	406125	405221	409128	471264	429034	352390	65898.6	461416	227107	174962	60044.4	2.13402e+06	94044.5	2.46202e+06	3.40105e+06	3.08361e+06	145806	83639.9	157472	93073.7	223754
1.195_899.5696			899.57	1.195						level5					3.56593e+07	3.51904e+07	3.80488e+07	3.25811e+07	3.68244e+07	3.3586e+07	3.60732e+07	3.42625e+07	3.80575e+07	3.5466e+07	3.42492e+07	2.84536e+07	4.2964e+07	5.94647e+07	3.2194e+07	4.29423e+07	4.12056e+07	2.95291e+07	3.4412e+07	5.5968e+07	3.84536e+07	3.42617e+07	3.16214e+07	3.93814e+07	3.85059e+07	3.51456e+07
1.198_272.0887	Arbutin	C12 H16 O7	272.089	1.198	C06186	S389765	HMDB0029943			level4	Organic oxygen compounds	Organooxygen compounds	Carbohydrates and carbohydrate conjugates	map00010 Glycolysis / Gluconeogenesis;	1.31601e+06	1.13243e+06	1.23896e+06	1.29413e+06	1.45009e+06	1.18227e+06	1.26148e+06	1.26086e+06	1.27575e+06	1.23506e+06	1.32166e+06	20213.2	1.61666e+06	479036	27401.6	27362.1	661126	5.11099e+06	3.9083e+06	823744	2.01494e+06	36780.7	45375.4	582705	2.82793e+06	679708
1.198_320.2343	(+/-)11-hete	C20 H32 O3	320.234	1.198		MReference-9826			80.4	level2					3.99482e+07	3.99482e+07	3.99482e+07	3.99482e+07	3.99482e+07	3.99482e+07	3.99482e+07	3.99482e+07	3.99482e+07	3.99482e+07	3.99482e+07	9.64401e+07	1.26022e+08	4.07189e+07	1.61218e+08	2.77748e+07	4.66879e+07	3.43196e+07	3.48454e+07	2.12269e+08	1.02836e+07	3.3895e+08	7.40224e+06	1.15186e+08	1.26839e+07	1.95109e+08
1.199_337.2608		C20 H35 N O3	337.261	1.199						level5					3.40106e+07	5.19428e+07	2.90374e+07	5.31881e+07	4.16868e+07	4.17911e+07	4.13271e+07	4.38661e+07	3.98755e+07	4.06938e+07	3.8888e+07	4.71815e+07	6.24584e+07	3.5169e+07	6.63432e+07	5.18613e+07	4.3356e+07	5.65091e+07	5.72901e+07	4.32905e+07	4.64523e+07	8.02987e+07	1.17998e+08	4.26721e+07	6.33765e+07	5.38353e+07
1.199_916.5595			916.559	1.199						level5					2.61382e+06	2.39368e+06	2.33277e+06	2.23444e+06	2.58327e+06	2.03086e+06	2.60034e+06	2.29356e+06	2.83263e+06	2.19355e+06	2.32121e+06	1.78825e+06	2.3326e+06	2.54466e+06	2.99876e+06	2.44305e+06	2.6461e+06	1.85386e+06	4.03123e+06	5.49139e+06	2.9862e+06	1.60839e+06	1.95981e+06	1.8951e+06	1.42382e+06	2.61382e+06
1.201_901.582			901.582	1.201						level5					8.82558e+06	8.34504e+06	8.67203e+06	7.98658e+06	8.69762e+06	8.30135e+06	8.64991e+06	7.96217e+06	8.70958e+06	8.28527e+06	8.90748e+06	6.48022e+06	9.57702e+06	1.29068e+07	7.73098e+06	1.09746e+07	1.00435e+07	8.36795e+06	8.49632e+06	1.26777e+07	8.73271e+06	8.02594e+06	7.15372e+06	9.45137e+06	7.78397e+06	9.64525e+06
1.203_418.3031		C21 H42 N2 O6	418.303	1.203						level5					19568.8	27434.5	26134.9	28837.1	25280.5	22423.7	23588	23225.3	21241.1	33934.8	23148.1	17753.9	24835.2	22072.7	24676.4	23915.3	25886.1	24503.6	53573.2	28249.7	26772	33174.7	43182.1	29335.4	33124	31249.6
1.204_224.0892		C8 H16 O7	224.089	1.204						level5					749439	749439	749439	749439	749439	749439	749439	749439	749439	749439	749439	24479.3	594578	1.58435e+06	28216.5	222256	519136	2.31178e+06	1.62736e+06	540317	952368	196906	50100.8	305453	1.29331e+06	233313
1.205_424.2562		C22 H36 N2 O6	424.256	1.205						level5					3.64984e+06	3.51947e+06	3.77366e+06	3.57661e+06	3.72232e+06	3.60074e+06	3.66404e+06	3.62496e+06	3.66431e+06	3.63419e+06	3.63954e+06	1.22465e+06	4.55759e+06	1.7364e+06	1.20975e+07	4.55903e+06	3.90589e+06	6.10919e+06	1.42417e+07	1.23593e+07	4.02683e+06	2.07839e+06	7.97124e+06	937371	2.09238e+06	6.35916e+06
1.208_232.1303		C11 H20 O5	232.13	1.208						level5					28069.5	27453.2	26657.5	25662.7	27387.3	27250.5	26905.6	27664	26638.9	28454.9	25838.9	63375.9	29159.7	28485.6	29286.5	28477.9	29631.5	32211.7	28454.5	34764	27007.9	36702	49121.8	38322.4	37963.6	36351.7
1.208_903.5959			903.596	1.208						level5					2.22264e+06	2.37513e+06	2.09701e+06	2.33074e+06	2.41128e+06	2.06994e+06	2.3435e+06	2.0344e+06	2.18062e+06	2.47575e+06	2.34186e+06	1.78051e+06	2.63788e+06	3.23745e+06	1.75433e+06	2.49973e+06	3.22221e+06	2.11768e+06	2.71368e+06	3.94179e+06	3.20054e+06	2.43194e+06	1.72702e+06	1.81692e+06	2.30783e+06	2.30777e+06
1.211_383.3027		C22 H41 N O4	383.303	1.211						level5					1.14574e+07	1.12804e+07	7.89584e+06	7.09965e+06	1.21926e+07	9.84648e+06	1.03725e+07	1.09524e+07	8.92215e+06	8.70197e+06	1.07725e+07	8.09492e+06	1.28223e+07	1.08455e+07	2.31377e+07	1.50194e+07	1.09709e+07	1.72011e+07	1.5146e+07	1.71783e+07	8.45077e+06	1.45002e+07	3.1295e+07	4.57866e+06	9.98817e+06	9.78334e+06
1.213_375.2762		C23 H37 N O3	375.276	1.213						level5					211455	200195	119992	136608	258305	176912	209857	174503	258991	218012	100820	141632	167495	148938	107297	151814	137937	124080	84574.5	136841	221550	177991	370182	194297	336784	191151
1.214_362.2643		C17 H39 N4 P S	362.264	1.214						level5					3.6498e+06	3.13712e+06	3.34745e+06	3.34196e+06	3.54647e+06	3.28454e+06	3.45583e+06	3.37893e+06	3.56289e+06	3.31554e+06	3.31779e+06	3.30223e+06	5.38568e+06	4.31215e+06	8.41338e+06	5.85559e+06	3.56599e+06	5.75725e+06	4.09164e+06	4.06933e+06	3.43939e+06	5.73564e+06	1.20776e+07	2.43155e+06	3.78704e+06	4.47802e+06
1.214_444.2825		C22 H40 N2 O7	444.283	1.214						level5					1.03616e+06	888866	1.24276e+06	942851	1.00779e+06	1.01516e+06	1.01898e+06	1.00454e+06	1.02417e+06	1.04715e+06	990851	324786	261136	57438.1	3.23358e+06	83005.5	153170	1.72775e+06	7.37291e+06	4.50444e+06	1.08601e+06	1.47679e+06	5.05535e+06	39090.4	122965	1.59788e+06
1.217_222.0523	O-succinylbenzoate	C11 H10 O5	222.052	1.217	C02730	S930				level4				map00130 Ubiquinone and other terpenoid-quinone biosynthesis; map01100 Metabolic pathways;	153802	142203	106319	110203	159511	127365	176571	140266	128302	157710	101570	19136.2	789506	32152.9	24065.3	21131.3	53807.1	398976	285623	133236	251958	28022.3	37364.3	28836.6	228479	122999
1.217_863.606		C43 H87 N5 O8 P2	863.606	1.217						level5					1.58152e+06	1.75941e+06	1.85568e+06	1.69117e+06	1.78908e+06	1.58832e+06	1.70675e+06	1.72355e+06	1.78211e+06	1.71871e+06	1.67824e+06	946735	2.27688e+06	1.33691e+06	2.05409e+06	1.19213e+06	6.29009e+06	1.29722e+06	8.74648e+06	1.06561e+07	8.88952e+06	1.38945e+06	1.43668e+06	1.33069e+06	1.17027e+06	1.54989e+06
1.219_328.2597		C15 H32 N6 O2	328.26	1.219					48.2	level5					3.33213e+06	3.02589e+06	3.23604e+06	3.40728e+06	3.56437e+06	3.45317e+06	1.40705e+06	4.36895e+06	2.14423e+06	4.05316e+06	4.21904e+06	738127	3.25302e+06	3.01286e+06	4.0215e+06	1.55833e+06	3.54573e+06	4.57515e+06	2.74527e+06	5.20517e+06	3.18454e+06	2.2037e+06	2.21661e+06	423963	4.02718e+06	1.23132e+06
1.223_877.5848			877.585	1.223						level5					3.02707e+07	3.03817e+07	3.10019e+07	2.89363e+07	3.27509e+07	2.97999e+07	3.03288e+07	3.06705e+07	3.01174e+07	3.03978e+07	3.11537e+07	2.2647e+07	3.59042e+07	5.07909e+07	2.10526e+07	5.20298e+07	4.12671e+07	2.8181e+07	2.92959e+07	4.49058e+07	2.86555e+07	5.76115e+07	2.78553e+07	2.32692e+07	3.17552e+07	2.99455e+07
1.224_443.3024		C27 H41 N O4	443.302	1.224						level5					8.15297e+06	8.10475e+06	8.62227e+06	8.52122e+06	9.32609e+06	8.07688e+06	8.39741e+06	8.62913e+06	8.11255e+06	8.81851e+06	8.43229e+06	7.06361e+06	1.15934e+07	9.79081e+06	2.36644e+07	1.19273e+07	1.12469e+07	1.07849e+07	3.52156e+07	4.75604e+07	8.64551e+06	1.97314e+07	3.16115e+07	6.01356e+06	9.12781e+06	1.10077e+07
1.225_892.5597		C40 H87 N4 O11 P3	892.56	1.225						level5					2.81918e+06	2.81367e+06	2.83276e+06	2.64408e+06	3.0942e+06	2.30532e+06	2.89757e+06	2.69616e+06	2.85475e+06	2.81e+06	2.83238e+06	2.21076e+06	1.95539e+06	2.67161e+06	2.38592e+06	2.84081e+06	2.41298e+06	2.38202e+06	2.73363e+06	3.94055e+06	2.16819e+06	1.35317e+06	2.28394e+06	1.83218e+06	1.64235e+06	2.74779e+06
1.227_881.61			881.61	1.227						level5					4.62054e+06	4.50536e+06	4.65878e+06	4.46675e+06	4.75132e+06	4.51904e+06	4.6194e+06	4.57316e+06	4.69184e+06	4.68384e+06	4.43113e+06	4.16418e+06	7.31822e+06	6.98917e+06	4.68623e+06	6.50453e+06	8.98821e+06	4.18465e+06	1.08996e+07	1.1272e+07	1.00446e+07	8.86852e+06	5.46538e+06	5.51923e+06	8.09815e+06	4.70065e+06
1.23_462.2713		C19 H39 N6 O5 P	462.271	1.23						level5					24627.9	23729.5	24911.7	22455.8	24391.6	23908.4	23842.6	23004.6	23646.6	26432.5	23057.2	21747.7	28698.8	25278.3	32987.9	26554.2	29952.4	25528.3	30712	31279.3	28767	33690.9	44786.3	31904.1	29676.3	33069.7
1.23_875.5702			875.57	1.23						level5					3.85826e+07	3.35354e+07	3.80182e+07	3.38958e+07	3.66784e+07	3.02252e+07	3.70899e+07	3.47599e+07	3.56281e+07	3.4244e+07	3.82459e+07	2.86281e+07	4.31936e+07	5.02879e+07	1.97271e+07	4.21678e+07	5.01081e+07	2.73e+07	3.33619e+07	5.35442e+07	3.39974e+07	3.71245e+07	3.65435e+07	4.22084e+07	4.33231e+07	3.40305e+07
1.231_376.2562		C18 H36 N2 O6	376.256	1.231						level5					3.32032e+06	3.22302e+06	3.27636e+06	3.02994e+06	3.41405e+06	3.29003e+06	3.19893e+06	3.28334e+06	3.08394e+06	3.33836e+06	3.32037e+06	5.69939e+06	2.93387e+06	56282.1	5.96316e+06	2.66538e+06	1.40634e+06	152151	2.20402e+06	1.75884e+06	3.46639e+06	2.60979e+06	4.23872e+06	2.7838e+06	2.37999e+06	6.13869e+06
1.231_839.6058		C53 H82 N3 O3 P	839.606	1.231						level5					2.40344e+06	2.50471e+06	2.48819e+06	2.39172e+06	2.48419e+06	2.43198e+06	2.46206e+06	2.45925e+06	2.52765e+06	2.3162e+06	2.51186e+06	826886	2.66864e+06	1.62963e+06	508373	1.83404e+06	1.07632e+07	847228	1.25225e+07	1.47373e+07	1.03143e+07	1.48267e+06	815393	927403	1.58091e+06	1.1096e+06
1.236_268.203		C16 H28 O3	268.203	1.236						level5					1.94353e+06	1.94353e+06	1.94353e+06	1.94353e+06	1.94353e+06	1.94353e+06	1.94353e+06	1.94353e+06	1.94353e+06	1.94353e+06	1.94353e+06	2.08909e+06	871133	1.26671e+06	1.96871e+06	1.44749e+06	1.11406e+06	1.28312e+06	1.25541e+06	1.10389e+06	675688	1.15077e+06	3.69523e+06	4.45926e+06	459904	6.58574e+06
1.236_381.2871	Prostaglandin f2î± dimethyl amide	C22 H39 N O4	381.287	1.236		S4446201				level4					1.35532e+07	1.19214e+07	1.34729e+07	1.0864e+07	1.59701e+07	1.06058e+07	1.33508e+07	1.24014e+07	1.22851e+07	1.22613e+07	1.44479e+07	8.89492e+06	2.30701e+07	1.02455e+07	2.51058e+07	1.79424e+07	1.63218e+07	1.74595e+07	2.60159e+07	2.63496e+07	1.54543e+07	2.61632e+07	8.64314e+07	7.01661e+06	1.70897e+07	1.54168e+07
1.236_837.5911			837.591	1.236						level5					1.50349e+06	1.56594e+06	1.48754e+06	1.49733e+06	1.70741e+06	1.49065e+06	1.42931e+06	1.74033e+06	1.45345e+06	1.51609e+06	1.55018e+06	307963	1.93571e+06	510996	436890	562680	7.75591e+06	262380	1.064e+07	1.13635e+07	1.34367e+07	515776	433233	446368	501977	697128
1.239_829.5835			829.583	1.239						level5					2.97372e+07	3.12774e+07	3.55117e+07	3.15865e+07	2.46257e+07	3.05709e+07	3.14592e+07	3.03614e+07	2.85956e+07	3.24734e+07	3.01867e+07	2.87113e+07	4.32227e+07	7.23627e+07	1.32828e+07	3.95402e+07	3.3213e+07	2.85214e+07	5.69904e+07	6.45466e+07	3.87523e+07	3.20277e+07	2.31287e+07	3.07033e+07	3.1007e+07	2.55352e+07
1.241_277.1671	Promacyl	C16 H23 N O3	277.167	1.241	C18955	S33736				level4				NULL	253549	261972	242090	270189	249727	255259	255311	255661	257124	250603	257970	258143	46740.1	43647.1	173773	111075	92303.6	241179	116083	104037	110394	563223	150362	690564	49336	342554
1.243_357.2871		C20 H39 N O4	357.287	1.243						level5					6.22345e+07	6.23491e+07	6.48756e+07	6.06378e+07	6.31005e+07	6.2623e+07	6.26157e+07	6.26745e+07	6.30268e+07	6.17103e+07	6.31052e+07	3.47177e+07	1.00734e+08	7.63687e+07	1.1138e+08	1.17211e+08	7.58436e+07	7.76991e+07	5.57075e+07	8.78396e+07	4.21732e+07	1.46177e+08	1.69876e+08	3.66203e+07	4.13882e+07	8.24494e+07
1.243_420.2824		C20 H40 N2 O7	420.282	1.243						level5					4.26152e+06	4.98191e+06	4.97837e+06	5.56788e+06	4.17788e+06	5.89759e+06	3.19622e+06	4.20314e+06	5.19287e+06	5.69005e+06	4.77557e+06	4.02657e+06	2.97348e+06	2.27198e+06	1.5686e+07	2.93711e+06	4.38e+06	5.39607e+06	2.76012e+07	7.92142e+06	7.93521e+06	1.83522e+06	7.55525e+06	1.93468e+06	595507	7.64685e+06
1.249_414.2719		C21 H38 N2 O6	414.272	1.249						level5					36019.2	35290.2	54294.3	45936	36279.7	33199.3	33561.9	52448.8	35368.1	38671.5	41443.1	31284	40429.3	34294.4	40876.4	37962.9	42083.3	36672	41541.4	77851.2	107254	47519	55697.7	50538	42235.6	40869.6
1.25_351.2764		C21 H37 N O3	351.276	1.25						level5					185225	192757	202518	96713.5	204743	163984	167687	142840	183924	126036	247431	216992	193648	135100	233697	227217	183717	323491	45986.1	152092	97318.8	273860	350140	195903	411255	100397
1.252_152.0471	2-anisic acid	C8 H8 O3	152.047	1.252		MReference-1252	HMDB0032604	64.9	86.1	level2	Benzenoids	Benzene and substituted derivatives	Benzoic acids and derivatives		9.77092e+06	9.68395e+06	8.94034e+06	9.98143e+06	9.31184e+06	9.61896e+06	9.56555e+06	9.50954e+06	9.46594e+06	9.60878e+06	9.56311e+06	14153.6	496890	67225.8	15074.8	13047.7	97237.9	758871	1.22981e+07	1.751e+06	1.31026e+07	120302	28624.3	1.28213e+06	217000	165698
1.252_311.2454		C18 H33 N O3	311.245	1.252						level5					5.28273e+06	5.81063e+06	6.60376e+06	7.2456e+06	2.95665e+06	5.15058e+06	5.84593e+06	5.66105e+06	5.31451e+06	4.46712e+06	6.14138e+06	4.42857e+06	4.86065e+06	4.1865e+06	2.89166e+07	8.81842e+06	4.75583e+06	1.70002e+07	9.00689e+06	327686	3.46095e+06	1.56753e+06	8.50603e+06	2.37048e+06	3.45236e+06	8.84407e+06
1.253_438.2716		C17 H39 N6 O5 P	438.272	1.253						level5					23609.6	24039.3	24029.1	22465.2	24638.7	23835.6	23704.4	23295.1	24484.6	22949.4	24217.6	20621.1	31375.9	32989.8	44826.4	28180.8	32000	24797.6	30876	41631.8	116013	33327.9	39203	31789.6	30903.9	31012.7
1.253_855.6011		C49 H81 N3 O9	855.601	1.253						level5					3.07956e+07	3.07956e+07	3.07956e+07	3.07956e+07	3.07956e+07	3.07956e+07	3.07956e+07	3.07956e+07	3.07956e+07	3.07956e+07	3.07956e+07	2.9249e+07	4.71163e+07	5.48521e+07	1.54664e+07	4.73107e+07	6.03338e+07	2.63481e+07	1.01273e+08	8.95942e+07	1.00021e+08	4.72796e+07	3.54559e+07	2.92122e+07	5.88431e+07	2.55262e+07
1.259_868.5603		C55 H83 O2 P3	868.56	1.259						level5					4.02709e+06	4.58191e+06	4.81091e+06	4.39561e+06	4.85262e+06	3.43368e+06	4.50501e+06	4.42778e+06	4.43342e+06	4.04703e+06	4.91864e+06	4.16195e+06	2.8167e+06	2.23935e+06	5.07726e+06	3.41183e+06	3.13271e+06	3.19561e+06	8.87018e+06	7.04142e+06	3.94764e+06	3.30408e+06	2.99791e+06	3.76564e+06	2.43736e+06	5.27682e+06
1.261_811.5739		C52 H77 N O6	811.574	1.261						level5					1.51759e+06	1.51039e+06	1.57636e+06	1.457e+06	1.63554e+06	1.27773e+06	1.5381e+06	1.60352e+06	1.63553e+06	1.43804e+06	1.45212e+06	269832	1.78257e+06	508979	85920.7	645159	8.68655e+06	120323	1.21778e+07	1.32873e+07	1.00929e+07	306331	185718	249985	711753	394085
1.263_359.0818		C18 H17 N O5 S	359.082	1.263						level5					36045.4	35540.5	35734.7	33580.2	36999.3	35948.1	35292.3	34664.4	37151.3	35137.6	35408.1	31080.2	46931.5	75577.8	40928.1	42352.9	51434.5	38027.6	47344.1	60234.4	47288.5	50393	61200	54071.2	45622.1	46447.7
1.263_430.2672		C25 H40 N2 P2	430.267	1.263						level5					37109.9	36590.1	36790	34571.9	38091.9	37009.7	36334.6	35688.1	38248.5	36175.3	36453.8	31998.1	48317.5	36950.5	42136.8	43603.7	52953.5	39150.6	48742.3	62013.2	48685.1	51881.3	63007.4	55668.1	46969.4	47819.4
1.265_366.276		C22 H38 O4	366.276	1.265						level5					4.35344e+06	3.38495e+06	4.76575e+06	3.71394e+06	3.47376e+06	4.12005e+06	4.19803e+06	4.11639e+06	3.86973e+06	3.85455e+06	3.83216e+06	7.34626e+06	2.32277e+06	3.54795e+06	7.7869e+06	3.10655e+06	3.43985e+06	5.99224e+06	2.89076e+06	3.93155e+06	2.40809e+06	6.03902e+06	1.32613e+06	5.67118e+06	4.41421e+06	6.84366e+06
1.27_814.5927		C38 H83 N6 O10 P	814.593	1.27						level5					844392	749664	1.01897e+06	731402	915028	577868	1.0074e+06	950337	785072	803788	769488	165911	729040	267184	111728	533479	6.49641e+06	27391.8	5.89899e+06	8.7489e+06	4.99477e+06	34690.4	103581	189473	506349	165952
1.271_242.1261		C11 H18 N2 O4	242.126	1.271						level5					1.3558e+07	1.33193e+07	1.37634e+07	1.36419e+07	1.40535e+07	1.30146e+07	1.4218e+07	1.37812e+07	1.34798e+07	1.33217e+07	1.37471e+07	1.02797e+07	1.05796e+07	1.90968e+07	1.71037e+07	2.45353e+07	1.20938e+07	1.55435e+07	968024	7.57749e+06	7.86188e+06	1.09999e+07	2.69934e+07	1.3455e+07	1.57615e+07	2.0981e+07
1.271_383.3028		C22 H41 N O4	383.303	1.271						level5					1.08835e+07	1.07418e+07	7.49705e+06	1.0936e+07	1.17631e+07	9.76577e+06	1.04817e+07	1.13449e+07	9.31077e+06	9.1035e+06	1.12975e+07	7.78514e+06	1.28134e+07	1.05603e+07	2.27534e+07	1.47986e+07	1.1059e+07	1.66661e+07	1.56114e+07	1.78822e+07	8.73201e+06	1.46645e+07	3.18722e+07	4.44724e+06	1.02442e+07	9.78893e+06
1.279_417.287		C25 H39 N O4	417.287	1.279						level5					3.42147e+06	2.9825e+06	2.80155e+06	3.1087e+06	4.25209e+06	2.31046e+06	3.06308e+06	3.44518e+06	2.8259e+06	3.61093e+06	3.11011e+06	3.03803e+06	3.29469e+06	3.40956e+06	1.04542e+07	5.76822e+06	3.12936e+06	4.70619e+06	4.65405e+06	2.10812e+06	7.53633e+06	2.45151e+06	4.07639e+06	1.53241e+06	1.87123e+06	4.16183e+06
1.28_827.5689		C52 H77 N O7	827.569	1.28						level5					1.0418e+08	9.78119e+07	1.03598e+08	1.05371e+08	1.0869e+08	1.01506e+08	1.02606e+08	1.06428e+08	9.95859e+07	1.06859e+08	1.0235e+08	8.78798e+07	1.59278e+08	1.72813e+08	4.42148e+07	1.51074e+08	1.722e+08	6.55345e+07	2.11552e+08	2.20122e+08	2.05086e+08	1.09697e+08	1.4035e+08	7.98136e+07	1.30699e+08	9.76865e+07
1.285_844.5609		C41 H87 N2 O9 P3	844.561	1.285						level5					6.21105e+06	6.21105e+06	6.21105e+06	6.21105e+06	6.21105e+06	6.21105e+06	6.21105e+06	6.21105e+06	6.21105e+06	6.21105e+06	6.21105e+06	5.24393e+06	8.78109e+06	8.82959e+06	6.84172e+06	1.43096e+07	9.24024e+06	6.76205e+06	7.7976e+06	1.30823e+07	1.0346e+07	4.98386e+06	7.17219e+06	4.66672e+06	7.89647e+06	6.78849e+06
1.288_355.2714		C20 H37 N O4	355.271	1.288						level5					3.03768e+07	3.07312e+07	2.89034e+07	3.44107e+07	2.91036e+07	3.03969e+07	2.98402e+07	3.1004e+07	3.07257e+07	3.07497e+07	3.0367e+07	2.34062e+07	4.07197e+07	2.64259e+07	6.98115e+07	3.58082e+07	4.19387e+07	4.56241e+07	6.72052e+07	2.99297e+07	2.20303e+07	5.30403e+07	6.52369e+07	2.53721e+07	3.48574e+07	3.31141e+07
1.289_815.6043		C40 H85 N3 O13	815.604	1.289						level5					670461	425570	515557	515991	473449	473504	722028	525402	386104	571445	539965	125866	402971	200612	103246	642962	3.51127e+06	111534	1.75182e+06	5.4062e+06	1.118e+06	167169	78576.5	131830	454768	78103.5
1.292_400.2564		C20 H36 N2 O6	400.256	1.292						level5					5.74132e+06	5.83121e+06	5.60891e+06	5.76479e+06	6.30596e+06	5.50526e+06	5.80278e+06	5.70272e+06	5.98043e+06	6.03746e+06	5.57378e+06	4.72693e+06	6.08401e+06	2.22218e+06	1.55651e+07	3.66816e+06	3.47736e+06	7.42147e+06	1.26196e+07	4.24095e+06	3.45795e+06	3.34196e+06	9.30753e+06	4.42277e+06	1.91267e+06	9.68603e+06
1.295_192.0531		C9 H8 N2 O3	192.053	1.295						level5					853771	923160	921725	942486	922880	905405	917723	887354	923044	890630	932954	15002.3	2.48607e+06	395234	17147.5	17729.1	484788	2.0923e+06	1.82093e+06	563463	986347	21581.5	24778.4	130003	881096	618296
1.296_351.1464	Zindoxifene	C21 H21 N O4	351.146	1.296	C14745	S59082				level4				NULL	574726	548372	598005	618156	689448	530932	594420	610996	536507	670763	580659	14754.9	3.62023e+06	133219	27002.5	34218.4	900909	7.77547e+06	3.50196e+06	1.21205e+06	1.37574e+06	37430.3	61918.4	32419.4	657523	689157
1.296_822.5744		C46 H85 N2 O4 P3	822.574	1.296						level5					1.87664e+06	1.22603e+06	901916	2.46453e+06	1.96693e+06	1.62505e+06	1.81708e+06	1.06858e+06	1.43679e+06	1.8553e+06	1.88177e+06	7.89029e+06	840357	912228	2.50412e+06	1.23249e+06	1.11608e+06	1.05003e+06	2.52808e+06	1.63189e+06	1.47289e+06	851924	717581	1.14843e+06	913004	1.24373e+06
1.297_857.615		C41 H89 N5 O9 P2	857.615	1.297						level5					4.28942e+06	6.45274e+06	5.29113e+06	4.6993e+06	5.14478e+06	5.12991e+06	5.06657e+06	5.12248e+06	5.35158e+06	5.00022e+06	5.05992e+06	4.34004e+06	8.22336e+06	4.94677e+06	3.27375e+06	8.50885e+06	6.71499e+06	2.53521e+06	1.46981e+07	1.16056e+07	6.92053e+06	8.97385e+06	5.92325e+06	4.33708e+06	8.36491e+06	7.3101e+06
1.299_335.2452	Oxeladin	C20 H33 N O3	335.245	1.299		S4458				level4					2.67287e+06	2.1999e+06	2.53165e+06	2.65509e+06	2.7135e+06	2.15615e+06	2.60394e+06	2.47336e+06	2.48337e+06	2.52815e+06	2.57335e+06	551748	3.8924e+06	2.05966e+06	2.98968e+06	2.82507e+06	3.44828e+06	3.65262e+06	2.71725e+06	3.69921e+06	3.15689e+06	4.11764e+06	4.41185e+06	1.51263e+06	1.64224e+06	3.30659e+06
1.3_337.2609		C20 H35 N O3	337.261	1.3						level5					2.72077e+07	2.80778e+07	2.53532e+07	3.1207e+07	2.54776e+07	2.73565e+07	2.64688e+07	2.75038e+07	2.75746e+07	2.75917e+07	2.72371e+07	2.17485e+07	3.55156e+07	2.14606e+07	5.79888e+07	2.66135e+07	3.61176e+07	4.03755e+07	6.05939e+07	2.29736e+07	1.92752e+07	5.12964e+07	6.21254e+07	2.39277e+07	3.14295e+07	2.93174e+07
1.3_402.2718		C20 H38 N2 O6	402.272	1.3						level5					2.79792e+06	2.7991e+06	3.00686e+06	3.49078e+06	3.05781e+06	2.68646e+06	2.94537e+06	2.90794e+06	3.25616e+06	3.20316e+06	2.6681e+06	2.19319e+06	1.86083e+06	1.85555e+06	9.06751e+06	2.45061e+06	280421	3.64341e+06	1.35735e+07	113849	179492	1.36819e+06	3.85544e+06	1.2198e+06	454776	4.19671e+06
1.3_406.2671		C19 H38 N2 O7	406.267	1.3						level5					31266.9	30632.8	31575.5	31728.3	31098.5	31054.8	31001.2	30818.4	33234.8	31055.1	30087.7	32168.6	43226.6	31970.4	71346.8	38524.5	50145.7	38867.6	44497	50905	37996.8	45113.4	50763.3	54763.6	38835.4	45684.4
1.302_478.2669		C25 H38 N2 O7	478.267	1.302						level5					1.2138e+06	1.23784e+06	1.16163e+06	1.20284e+06	1.38417e+06	1.0955e+06	1.25303e+06	1.23799e+06	1.25364e+06	1.18879e+06	1.22961e+06	1.11983e+06	971974	462194	4.23278e+06	1.04614e+06	424094	2.23796e+06	1.36487e+06	557605	514638	940419	1.48073e+06	569129	268519	2.05081e+06
1.304_415.2713	Salmeterol	C25 H37 N O4	415.271	1.304	C07241	S4968	HMDB0015073			level4	Benzenoids	Benzene and substituted derivatives	Benzyl alcohols	NULL	7.20202e+06	7.43483e+06	7.28143e+06	7.7888e+06	7.2547e+06	7.34393e+06	7.42668e+06	7.46051e+06	6.51057e+06	8.01469e+06	7.57439e+06	5.70542e+06	1.76173e+07	9.19179e+06	2.172e+07	2.13e+07	1.38663e+07	1.35225e+07	1.21288e+07	1.00003e+07	8.73681e+06	1.31559e+07	3.33298e+07	3.99533e+06	1.29717e+07	1.38604e+07
1.318_357.2872		C20 H39 N O4	357.287	1.318						level5					3.05943e+07	3.29723e+07	3.41776e+07	3.09568e+07	3.39124e+07	3.08878e+07	3.14249e+07	3.55941e+07	3.18176e+07	2.99612e+07	3.32023e+07	2.42898e+07	1.15802e+06	1.09367e+07	568898	3.69528e+07	1.86605e+07	3.31521e+07	171599	3.78789e+06	2.01891e+07	5.04914e+07	5.92788e+07	2.45939e+07	3.62104e+07	2.34466e+07
1.318_789.5896		C47 H86 N O2 P3	789.59	1.318						level5					647203	647203	647203	647203	647203	647203	647203	647203	647203	647203	647203	179548	569712	321432	39273.2	783344	5.13768e+06	128527	6.02725e+06	4.86686e+06	2.89062e+06	386747	168675	152553	961656	200327
1.319_313.2609	Palgly	C18 H35 N O3	313.261	1.319		S133100	HMDB0013034			level4	Organic acids and derivatives	Carboxylic acids and derivatives	Amino acids, peptides, and analogues		6.60206e+07	4.36973e+07	4.03506e+07	4.59252e+07	5.01063e+07	4.9416e+07	4.60524e+07	4.94516e+07	4.31586e+07	5.12966e+07	5.24405e+07	4.52088e+07	1.07568e+08	8.15652e+07	1.28821e+08	1.12347e+08	7.14917e+07	9.06426e+07	1.09247e+08	7.20028e+07	5.51979e+07	1.04967e+08	1.58046e+08	5.00244e+07	7.01834e+07	8.95143e+07
1.324_404.2515		C23 H38 N2 P2	404.252	1.324						level5					31746	33313.3	32009	33154.9	31680.7	56206.4	29444.8	32619.1	33094.2	34792.8	33050.1	29148.1	34963	30815.3	34425.3	35833.1	39095.9	38318.6	46583.2	52428.1	38373.6	43229.7	48731.3	44712.7	39648.1	43604
1.324_787.574		C43 H82 N O9 P	787.574	1.324						level5					661971	875124	605154	814475	603060	739537	959525	497115	780311	750727	728530	103333	329343	184114	28361.5	615997	5.1734e+06	70962.6	1.69378e+06	6.91303e+06	1.51304e+06	209732	68157.8	85872.3	654878	109321
1.325_376.2565		C18 H36 N2 O6	376.257	1.325						level5					7.88171e+06	8.47545e+06	8.55524e+06	8.27059e+06	8.82914e+06	7.83718e+06	8.37735e+06	8.34283e+06	8.19378e+06	8.511e+06	8.35277e+06	8.81865e+06	9.60854e+06	6.48419e+06	2.35114e+07	8.97807e+06	5.85378e+06	1.41692e+07	1.07286e+07	7.07939e+06	4.66153e+06	1.01865e+07	1.24634e+07	7.1955e+06	5.12752e+06	1.52447e+07
1.33_368.2532		C17 H32 N6 O3	368.253	1.33						level5					371296	371296	371296	371296	371296	371296	371296	371296	371296	371296	371296	15597.2	271454	23128.2	40102.6	54242.8	1.5016e+06	93325.9	755418	1.78028e+06	448572	155802	75359.7	402679	206766	80228.4
1.33_420.2831		C20 H40 N2 O7	420.283	1.33						level5					727029	727029	727029	727029	727029	727029	727029	727029	727029	727029	727029	53831.8	42243.7	32846.9	35598.1	33384.4	84215.6	1.00794e+06	58071.8	16222.4	473176	713287	104908	389437	13960.1	1.3446e+06
1.332_385.2432		C15 H35 N3 O8	385.243	1.332						level5					119380	111789	120161	155181	161429	105783	128194	120556	149783	111039	139224	39091.2	41083.6	23893	30978.2	36896.9	115936	35484.6	163911	353088	46354	37340.1	58867.5	191891	48087.2	48270
1.336_805.584	O-{hydroxy[2-(nonadecanoyloxy)-3-(stearoyloxy)propoxy]phosphoryl}-l-serine	C43 H84 N O10 P	805.584	1.336		S7826047				level4					4.22722e+07	3.82945e+07	3.36065e+07	3.76941e+07	4.34324e+07	3.88391e+07	3.88026e+07	3.84669e+07	4.43739e+07	3.12402e+07	4.28601e+07	3.52306e+07	1.3475e+08	3.14821e+07	2.34785e+07	9.7939e+07	4.94252e+08	1.85853e+07	2.17164e+08	1.12678e+08	3.12043e+08	2.30815e+07	2.78649e+08	2.33601e+07	1.74251e+08	4.51419e+07
1.338_820.5593		C43 H77 N6 O7 P	820.559	1.338						level5					5.8441e+06	3.69064e+06	6.3475e+06	4.13808e+06	6.10491e+06	4.7738e+06	5.15562e+06	5.24316e+06	4.71993e+06	4.94068e+06	5.40554e+06	4.52641e+06	9.10065e+06	7.5189e+06	3.10292e+06	8.11596e+06	3.50962e+06	1.49602e+06	3.25303e+06	7.07527e+06	3.16953e+06	4.32009e+06	3.11199e+06	4.96454e+06	3.32414e+06	5.19663e+06
1.339_374.241		C18 H34 N2 O6	374.241	1.339						level5					2.07853e+06	1.67847e+06	1.69309e+06	2.39462e+06	1.76207e+06	2.00559e+06	1.81593e+06	1.84216e+06	1.98428e+06	1.94473e+06	1.87783e+06	1.24106e+06	1.52654e+06	1.03295e+06	5.4857e+06	2.53183e+06	1.72316e+06	2.29524e+06	2.38388e+06	2.02768e+06	1.10486e+06	418917	1.34165e+06	814836	694247	3.16765e+06
1.339_391.2714	N-[(5z,8z,11z,14z)-5,8,11,14-icosatetraenoyl]serine	C23 H37 N O4	391.271	1.339		S4446511				level4					2.37895e+07	1.20481e+07	2.11592e+07	2.21268e+07	3.11495e+07	3.02405e+07	1.92607e+07	2.147e+07	2.04534e+07	2.14583e+07	2.17279e+07	1.94519e+07	3.01597e+07	2.72833e+07	5.64459e+07	3.41495e+07	2.0998e+07	4.17656e+07	2.52142e+07	2.21892e+07	1.76293e+07	3.37269e+07	6.20449e+07	1.36794e+07	2.25925e+07	2.51622e+07
1.343_400.2562		C20 H36 N2 O6	400.256	1.343						level5					3.64694e+06	3.79996e+06	3.64904e+06	3.74501e+06	4.05121e+06	3.55142e+06	3.74474e+06	3.68213e+06	3.86173e+06	3.89862e+06	3.59925e+06	3.17603e+06	119035	46964.6	55228.7	62921.3	2.12902e+06	4.7983e+06	2.1863e+06	2.55812e+06	2.16863e+06	2.15649e+06	5.79049e+06	2.85786e+06	1.1103e+06	6.24862e+06
1.344_362.245	(+/-)19(20)-dihdpa	C22 H34 O4	362.245	1.344		MReference-9775			90.9	level2					1.54028e+07	1.43511e+07	1.38422e+07	1.46136e+07	1.81313e+07	1.51592e+07	1.53132e+07	1.54006e+07	1.14755e+07	1.78257e+07	1.63648e+07	1.98535e+07	2.29615e+07	1.20987e+07	2.00598e+07	1.76074e+07	8.05462e+06	2.19892e+07	1.8536e+07	8.58807e+06	1.54765e+07	3.11683e+07	1.95602e+07	2.90337e+07	1.95084e+07	2.49948e+07
1.345_281.2066		C10 H27 N5 O4	281.207	1.345						level5					4.47478e+06	4.52918e+06	4.35873e+06	4.6208e+06	4.6101e+06	4.5102e+06	4.4845e+06	4.25987e+06	4.2956e+06	5.20009e+06	4.31923e+06	3.34543e+06	7.55047e+06	5.94931e+06	5.71468e+06	2.31108e+06	5.16233e+06	3.92312e+06	5.5638e+06	4.75169e+06	6.93062e+06	8.98341e+06	8.87527e+06	7.52231e+06	3.26289e+06	1.05574e+07
1.346_308.1979	5-o-methyl embelin	C18 H28 O4	308.198	1.346	C10373	S149914	HMDB0040867		73.2	level4	Organic oxygen compounds	Organooxygen compounds	Carbonyl compounds	NULL	430811	330800	325586	487490	343681	364276	383407	398295	432399	319994	376133	196176	61027.2	65423.1	61550.5	33488.7	47698.7	72490.7	64121.4	26289.5	18426.7	953694	938602	1.49716e+06	40254.1	913429
1.347_242.1261		C11 H18 N2 O4	242.126	1.347						level5					1.04034e+07	1.04034e+07	1.04034e+07	1.04034e+07	1.04034e+07	1.04034e+07	1.04034e+07	1.04034e+07	1.04034e+07	1.04034e+07	1.04034e+07	6.83655e+06	1.16396e+07	1.92357e+07	2.11708e+07	2.87976e+07	1.5309e+07	1.49751e+07	3.82258e+07	3.73386e+07	1.33461e+07	6.14173e+06	2.8849e+07	9.01808e+06	1.64598e+07	1.82996e+07
1.347_353.292		C21 H39 N O3	353.292	1.347						level5					181829	181829	181829	181829	181829	181829	181829	181829	181829	181829	181829	223024	202754	309719	194281	239188	129766	182044	56891	103958	158123	180338	382157	88745	272614	166430
1.352_454.2668		C23 H38 N2 O7	454.267	1.352						level5					5.42293e+06	4.76209e+06	4.5569e+06	4.72201e+06	5.13864e+06	4.78206e+06	5.00012e+06	4.75196e+06	5.05845e+06	4.93298e+06	4.86029e+06	4.91983e+06	4.91315e+06	3.08145e+06	1.95156e+07	4.90668e+06	3.07304e+06	7.66845e+06	4.27525e+06	3.07272e+06	3.14241e+06	4.70008e+06	7.9123e+06	2.78887e+06	1.99459e+06	8.37382e+06
1.356_272.1		C11 H16 N2 O6	272.1	1.356						level5					832270	772046	833367	802964	796640	814063	807065	806443	799272	821275	804327	1.28614e+06	827893	898318	1.71498e+06	634778	411097	232292	283339	369885	315977	1.51579e+06	1.89488e+06	757811	732428	517619
1.365_254.0572	Daidzein	C15 H10 O4	254.057	1.365	C10208	MReference-680	HMDB0003312		91.6	level2	Phenylpropanoids and polyketides	Isoflavonoids	Isoflav-2-enes		5.12362e+06	5.99006e+06	6.10027e+06	6.03297e+06	6.06779e+06	5.28541e+06	5.74553e+06	5.6552e+06	5.98617e+06	5.82406e+06	5.75383e+06	7.0108e+06	6.62647e+06	4.54037e+06	4.59082e+06	8.46307e+06	7.0511e+06	1.15863e+07	1.34756e+07	1.2213e+07	1.00036e+07	5.94291e+06	6.38285e+06	1.02816e+07	5.67246e+06	6.77422e+06
1.366_205.0404	Dacisteine	C7 H11 N O4 S	205.04	1.366		S59118			50.4	level4					1.66523e+06	1.60528e+06	1.75695e+06	1.66203e+06	1.63327e+06	1.66397e+06	1.66449e+06	1.65799e+06	1.66301e+06	1.69094e+06	1.6435e+06	1.24453e+06	1.15411e+06	3.00634e+06	2.42919e+06	2.84069e+06	1.80006e+06	1.00553e+06	730455	1.78539e+06	604218	4.83837e+06	2.12015e+06	1.39452e+06	1.68721e+06	866583
1.366_412.3293		C23 H44 N2 O4	412.329	1.366						level5					437154	465198	622893	533181	543847	390840	523632	440895	526783	569247	484710	179126	619963	526363	511483	603578	804156	2.33463e+06	2.5879e+06	1.29839e+06	821070	84076.6	95180.5	259151	567266	786303
1.367_393.2874		C23 H39 N O4	393.287	1.367						level5					3.57159e+06	3.00889e+06	4.45225e+06	3.188e+06	3.3385e+06	2.3793e+06	3.73677e+06	3.39184e+06	3.33484e+06	3.50727e+06	3.3835e+06	1.60924e+06	3.46143e+06	4.12699e+06	6.52386e+06	4.56782e+06	2.55423e+06	5.17251e+06	2.39473e+06	2.95056e+06	2.61062e+06	3.4416e+06	5.72295e+06	1.46478e+06	2.24592e+06	2.73642e+06
1.367_475.3247		C23 H45 N3 O7	475.325	1.367						level5					610498	654957	773950	782697	912074	544732	713887	638231	685868	695249	865707	303731	563058	429710	631914	478153	666057	2.67965e+06	2.57286e+06	1.18485e+06	924047	39300.8	120763	383531	454490	906169
1.368_152.1198	(+/-)-camphor	C10 H16 O	152.12	1.368	C00809	S2441				level4	Terpenoids	Monoterpenoids (C10)	Cyclic monoterpenes	map04750 Inflammatory mediator regulation of TRP channels;	505173	481864	467550	461739	488149	502043	491463	448680	506103	466104	500507	895199	931991	431066	671911	587134	268773	500040	170003	222471	300520	1.14544e+06	2.10783e+06	481691	380509	830540
1.368_343.0944		C12 H17 N5 O5 S	343.094	1.368						level5					1.88879e+06	1.92192e+06	1.81783e+06	1.941e+06	1.89006e+06	1.9079e+06	1.93489e+06	1.87283e+06	1.93534e+06	1.76927e+06	1.97721e+06	1.89534e+06	1.41926e+06	1.70371e+06	2.57335e+06	1.56868e+06	2.86421e+06	1.88665e+06	2.33695e+06	3.14973e+06	2.9617e+06	1.11551e+06	2.08675e+06	1.47105e+06	840142	1.82973e+06
1.369_366.2375	Acetate2?,3?-(difluoromethylene)-5?-androstan-17?-ol	C22 H32 F2 O2	366.238	1.369	C15322	S220457				level4				NULL	271860	211654	301955	324270	244632	229730	268942	258018	243198	234768	329394	138448	106210	85404.5	178767	35689.1	509057	74099	249556	1.71374e+06	109136	277805	149202	811422	47343.3	605926
1.37_779.5693		C48 H77 N O7	779.569	1.37						level5					5.1828e+06	3.48149e+06	4.76711e+06	3.54906e+06	3.55111e+06	4.10251e+06	4.63615e+06	3.45635e+06	3.6114e+06	4.56716e+06	4.48501e+06	5.39769e+06	4.59398e+06	3.22947e+06	4.58656e+06	3.96264e+06	9.96541e+06	2.82963e+06	1.47289e+07	3.13721e+06	9.60308e+06	3.45361e+06	2.82232e+06	4.33941e+06	2.86757e+06	5.69167e+06
1.372_389.2557		C23 H35 N O4	389.256	1.372						level5					1.69856e+06	1.69856e+06	1.69856e+06	1.69856e+06	1.69856e+06	1.69856e+06	1.69856e+06	1.69856e+06	1.69856e+06	1.69856e+06	1.69856e+06	876509	1.3746e+06	1.90756e+06	2.54313e+06	4.17684e+06	1.96728e+06	2.78566e+06	1.01092e+06	1.70761e+06	960726	1.43824e+06	3.60532e+06	486657	681861	2.18326e+06
1.374_383.1184		C21 H21 N O4 S	383.118	1.374						level5					583094	601047	588094	537390	602084	563645	588108	563286	594500	542502	621648	37491.6	564207	46511.9	51973.6	51971.1	436492	9.9875e+06	1.20768e+06	442407	1.47442e+06	48136.8	67520	45630.5	78326.9	574575
1.375_376.2563		C18 H36 N2 O6	376.256	1.375						level5					7.38357e+06	7.93979e+06	8.01454e+06	7.74787e+06	8.27112e+06	7.34186e+06	7.84789e+06	7.81555e+06	7.67592e+06	7.97309e+06	7.82486e+06	8.26129e+06	75010.8	6.07438e+06	91575.3	8.41065e+06	5.48381e+06	1.32737e+07	1.00506e+07	6.63196e+06	4.36691e+06	9.5427e+06	1.16757e+07	6.74073e+06	4.80345e+06	1.42812e+07
1.375_425.2406		C22 H35 N O7	425.241	1.375						level5					2.39336e+06	2.01871e+06	2.45858e+06	2.2148e+06	2.51761e+06	1.66171e+06	2.48732e+06	1.75215e+06	1.8026e+06	2.66277e+06	2.89138e+06	1.86046e+06	2.23495e+06	1.03138e+06	3.80269e+06	1.13399e+06	1.45507e+06	3.63589e+06	1.59192e+06	1.48586e+06	1.46916e+06	1.99558e+06	2.3426e+06	2.72497e+06	844409	4.54872e+06
1.38_366.2761		C22 H38 O4	366.276	1.38						level5					2.03737e+06	1.3725e+06	2.03534e+06	1.42528e+06	2.20035e+06	1.54001e+06	1.67309e+06	1.55696e+06	2.19657e+06	1.74742e+06	1.63739e+06	1.40668e+06	1.19128e+06	1.81055e+06	6.28224e+06	1.78452e+06	1.57175e+06	3.8958e+06	790578	1.19182e+06	440057	1.40928e+06	2.11749e+06	1.24459e+06	1.5041e+06	1.73751e+06
1.38_592.4689		C37 H60 N4 O2	592.469	1.38						level5					79089	38528.9	39157.9	41154.3	45196.5	46165.7	49639.4	44342.5	58983.7	43810.3	42954.3	49714	54949.3	59995.9	63345	58945.3	50866.3	57917.6	50229.8	50012.1	41156.5	323976	339337	357208	43733.5	472299
1.383_286.2501	Methyl 3-hydroxypalmitate	C17 H34 O3	286.25	1.383	C11849	S93492				level4					922144	893188	893286	977560	976031	967166	683175	996884	918930	937716	975432	115302	327943	184750	542594	97178.5	2.23993e+06	470084	571225	1.70127e+06	456476	210406	118532	2.21062e+06	229377	363045
1.387_829.5836		C39 H85 N5 O9 P2	829.584	1.387						level5					3.09775e+07	3.09899e+07	3.16506e+07	3.1673e+07	3.22837e+07	2.78463e+07	3.15147e+07	3.13239e+07	3.03826e+07	3.21328e+07	3.13529e+07	738926	2.26333e+06	6.07967e+07	1.12341e+07	5.43333e+07	5.70631e+07	2.29578e+07	5.46821e+07	6.75149e+07	5.99563e+07	2.96654e+07	3.61606e+07	2.64258e+07	4.38835e+07	2.39926e+07
1.388_428.2878		C22 H40 N2 O6	428.288	1.388						level5					42958	40359.6	42642.5	40653.2	43568.3	41118.3	41798.3	42694.5	41435	42377.9	41547.2	46937.5	50707.5	53520.3	56274.7	53172.6	47461.1	52409.9	49313.7	45991.7	39555.1	52895.5	60184.5	53355.3	42130.1	51262.9
1.391_338.2449	(+/-)11(12)-dihet	C20 H34 O4	338.245	1.391		MReference-9805			84.8	level2					3.98905e+07	3.89481e+07	4.72421e+07	4.17223e+07	4.95043e+07	3.91569e+07	4.39937e+07	3.67962e+07	4.14e+07	4.58846e+07	4.61566e+07	5.21352e+07	1.01203e+08	3.62555e+07	5.75647e+07	4.09165e+07	3.39775e+07	8.08474e+07	4.25164e+07	2.24032e+07	3.33319e+07	8.41295e+07	1.37787e+08	1.15493e+08	6.56383e+07	1.54501e+08
1.393_280.2031	12-hhtre	C17 H28 O3	280.203	1.393		S4472190				level4					2.36522e+07	2.33362e+07	2.32036e+07	2.45987e+07	2.55552e+07	2.46108e+07	2.0986e+07	2.42162e+07	2.92721e+07	1.87785e+07	2.62789e+07	2.61101e+07	3.50886e+07	2.79128e+07	3.31575e+07	1.05487e+07	2.513e+07	2.15204e+07	3.73805e+07	3.22679e+07	5.01595e+07	3.74605e+07	3.74134e+07	2.60014e+07	1.36184e+07	4.47693e+07
1.395_434.2989		C22 H46 N2 O2 S2	434.299	1.395						level5					1.79054e+06	1.75142e+06	1.81815e+06	1.77964e+06	1.8211e+06	1.65221e+06	1.8422e+06	1.63166e+06	1.83786e+06	1.72644e+06	1.9052e+06	2.09034e+06	4.17611e+06	3.55065e+06	3.44118e+06	3.25648e+06	1.63906e+06	1.53898e+06	2.84202e+06	1.7775e+06	2.01291e+06	4.82236e+06	3.25072e+06	1.66706e+06	2.28646e+06	1.80778e+06
1.397_531.3753		C26 H56 N5 P3	531.375	1.397						level5					1.66835e+06	963366	1.52775e+06	1.91218e+06	1.65821e+06	1.49012e+06	1.18181e+06	1.65147e+06	1.52691e+06	1.49167e+06	1.46307e+06	1.41638e+06	1.62585e+06	2.04376e+06	4.72209e+06	1.61937e+06	1.57151e+06	2.2071e+06	2.91471e+06	1.32357e+06	1.71084e+06	97845.1	110007	2.13969e+06	163733	5.68094e+06
1.399_126.0045	[similar to: imidazoleacetic acid; δmass: -0.0385 da]		126.004	1.399						level5					912599	912599	912599	912599	912599	912599	912599	912599	912599	912599	912599	751681	82935.7	4.41724e+06	2.74676e+07	4.87624e+06	162883	2.24819e+06	4.45624e+06	2.36203e+06	4.0773e+06	4.33321e+07	2.24847e+06	4.57718e+06	2.09409e+06	123094
1.4_242.1262		C11 H18 N2 O4	242.126	1.4						level5					1.06e+07	1.06e+07	1.06e+07	1.06e+07	1.06e+07	1.06e+07	1.06e+07	1.06e+07	1.06e+07	1.06e+07	1.06e+07	6.93988e+06	1.15948e+07	1.83995e+07	1.9448e+07	2.70426e+07	1.56072e+07	1.47339e+07	3.56962e+07	3.23328e+07	1.21469e+07	6.45332e+06	2.9062e+07	8.74957e+06	1.60602e+07	1.79632e+07
1.403_432.2827		C22 H36 N6 O3	432.283	1.403						level5					1.20073e+07	1.205e+07	1.19944e+07	1.20669e+07	1.35278e+07	1.0149e+07	1.26738e+07	1.20377e+07	1.19261e+07	1.1432e+07	1.3178e+07	8.12167e+06	1.71568e+07	1.32096e+07	3.29063e+07	2.09892e+07	1.43103e+07	1.86614e+07	1.07577e+07	1.43557e+07	8.85162e+06	9.48353e+06	1.55118e+07	4.80158e+06	7.30343e+06	1.32528e+07
1.405_832.603			832.603	1.405						level5					1.55658e+07	1.55658e+07	1.55658e+07	1.55658e+07	1.55658e+07	1.55658e+07	1.55658e+07	1.55658e+07	1.55658e+07	1.55658e+07	1.55658e+07	1.45335e+07	2.66941e+07	2.18329e+07	8.41015e+06	1.99528e+07	7.26426e+07	1.43067e+07	5.14222e+07	4.37557e+07	4.50817e+07	2.4091e+07	3.05942e+07	1.65338e+07	4.56919e+07	1.89349e+07
1.406_126.0427	Imidazoleacetic acid	C5 H6 N2 O2	126.043	1.406	C02835	MReference-442	HMDB0002024	16.6	76.7	level2	Organoheterocyclic compounds	Azoles	Imidazoles	map00340 Histidine metabolism; map01100 Metabolic pathways;	3.638e+08	3.68952e+08	3.71118e+08	3.72615e+08	3.66958e+08	3.67799e+08	3.72149e+08	3.67484e+08	3.68184e+08	3.6624e+08	3.70717e+08	5.20736e+08	3.92891e+08	4.89169e+08	5.03647e+08	4.47165e+08	3.26327e+08	4.81353e+08	2.93288e+08	2.85365e+08	2.45229e+08	4.50945e+08	3.76387e+08	3.49504e+08	3.0636e+08	3.78541e+08
1.406_201.1361	Capryloylglycine	C10 H19 N O3	201.136	1.406		MReference-339	HMDB0000832		30.3	level3	Organic acids and derivatives	Carboxylic acids and derivatives	Amino acids, peptides, and analogues		1.66016e+06	1.63679e+06	1.55036e+06	1.69353e+06	1.64942e+06	1.54892e+06	1.60175e+06	1.723e+06	1.5682e+06	1.57658e+06	1.69253e+06	1.5861e+06	1.98996e+06	2.1617e+06	1.87736e+06	2.18734e+06	1.97493e+06	2.53894e+06	1.11161e+06	1.66372e+06	1.36585e+06	1.85332e+06	3.31011e+06	3.46739e+06	2.65765e+06	2.91341e+06
1.407_285.2297	1794967	C16 H31 N O3	285.23	1.407		S65286	HMDB0013250			level4	Organic acids and derivatives	Carboxylic acids and derivatives	Amino acids, peptides, and analogues		2.76439e+06	2.66448e+06	2.87423e+06	2.88425e+06	2.82153e+06	2.65133e+06	2.76055e+06	2.80218e+06	2.88076e+06	2.83698e+06	2.66933e+06	2.77147e+06	3.81219e+06	3.2986e+06	5.24796e+06	5.27774e+06	3.82212e+06	4.24324e+06	2.64928e+06	2.90944e+06	2.63314e+06	1.72599e+06	1.74761e+06	2.28019e+06	1.91034e+06	2.93453e+06
1.408_194.0299		C5 H13 N2 P3	194.03	1.408						level5					1.9884e+06	1.9884e+06	1.9884e+06	1.9884e+06	1.9884e+06	1.9884e+06	1.9884e+06	1.9884e+06	1.9884e+06	1.9884e+06	1.9884e+06	2.76242e+06	1.46272e+06	2.03098e+06	3.29387e+06	1.60966e+06	1.38269e+06	1.8639e+06	1.84597e+06	1.54492e+06	1.5067e+06	1.46704e+06	1.05601e+06	1.27809e+06	1.20271e+06	2.06349e+06
1.409_157.1464		C9 H19 N O	157.146	1.409						level5					2.85753e+06	2.84634e+06	2.90841e+06	2.94076e+06	2.86747e+06	2.90419e+06	2.92134e+06	2.6914e+06	2.98371e+06	2.93752e+06	2.88377e+06	3.02518e+06	3.60933e+06	3.5895e+06	3.22798e+06	3.68825e+06	3.52415e+06	4.40151e+06	1.5882e+06	2.68442e+06	1.82156e+06	3.39112e+06	5.20135e+06	5.654e+06	4.38202e+06	5.41472e+06
1.413_443.3025		C27 H41 N O4	443.303	1.413						level5					68798.7	86530.2	80868.9	54800.9	111788	81327.7	89150.4	61276.5	75163.8	76187.6	95215.1	92335.2	36734.3	55815	95821	88784.5	31394.2	54634.8	23786.4	31905.4	31557.9	218965	129711	48119.3	110097	70300.1
1.415_779.5691		C40 H83 N3 O7 P2	779.569	1.415						level5					7.51733e+06	7.51733e+06	7.51733e+06	7.51733e+06	7.51733e+06	7.51733e+06	7.51733e+06	7.51733e+06	7.51733e+06	7.51733e+06	7.51733e+06	4.77043e+06	1.94616e+07	1.16587e+07	7.98967e+06	1.6398e+07	1.70286e+07	7.71813e+06	1.48172e+07	1.56984e+07	2.13194e+07	1.12036e+07	7.22285e+06	5.19106e+06	6.00306e+06	1.08893e+07
1.417_451.2748		C25 H41 N O4 S	451.275	1.417						level5					1.00724e+06	999668	988820	961984	1.05322e+06	991795	997004	1.01068e+06	998116	1.02769e+06	971796	877104	954774	514020	3.2082e+06	1.04229e+06	457113	1.42614e+06	727858	608438	501054	864986	1.26582e+06	519278	319628	1.58117e+06
1.423_530.2971		C26 H49 N2 O3 P3	530.297	1.423						level5					69426.9	67598.1	67720.9	67430.4	68801	68041.3	66921.6	71342	65665.6	67259.7	69499.9	103714	71693.6	78367	117009	83224.3	67177	78150.3	73064.5	69564.8	62343.9	86481.8	104167	96518.2	87412.6	72025.8
1.425_362.245	(+/-)7(8)-dihdpa	C22 H34 O4	362.245	1.425		MReference-9761			89.3	level2					1.00562e+07	1.01389e+07	1.05882e+07	1.21165e+07	1.63186e+07	1.04489e+07	1.2022e+07	5.50534e+06	1.6656e+07	1.47029e+07	1.10418e+07	3.91881e+06	3.99948e+07	1.80974e+07	4.15062e+07	4.22371e+07	3.07083e+07	2.77577e+07	5.70685e+07	3.85573e+07	6.76856e+07	1.35725e+07	8.80087e+07	1.13619e+07	2.01168e+07	8.22393e+07
1.426_404.2878		C20 H40 N2 O6	404.288	1.426						level5					46584.6	43540.1	45915.3	43418.6	46301.6	41588.9	45740.7	44846.1	45756	44983.8	44208.6	71393.3	51371.5	55160.8	83402.1	59660.4	48045.4	54556	51459	48577.2	43816.2	55834.6	65314	61441.2	61815.1	51639.1
1.43_456.3229	Callystatin a	C29 H44 O4	456.323	1.43	C16891	S4581330				level4				NULL	1.00406e+06	1.04742e+06	999989	1.02884e+06	1.13441e+06	1.09372e+06	1.09414e+06	988400	975066	993148	1.18448e+06	3.27777e+06	932026	5.26727e+06	4.47115e+06	1.7019e+06	655036	72189.8	156733	573043	178826	78952.9	94486.7	454555	79418.6	73290
1.432_367.2715	3, 5-tetradecadiencarnitine	C21 H37 N O4	367.272	1.432		S30776713	HMDB0013331			level4	null	null	null		4.48843e+07	4.60013e+07	4.72867e+07	4.58773e+07	4.84525e+07	3.53166e+07	5.80715e+07	4.02812e+07	3.86972e+07	4.32575e+07	5.8342e+07	3.01693e+07	8.08473e+07	5.87964e+07	6.83359e+07	7.92497e+07	6.73422e+07	6.75571e+07	5.55145e+07	7.01413e+07	6.40435e+07	1.17434e+08	1.90814e+08	2.92334e+07	1.03121e+08	5.13737e+07
1.433_232.073	2-methyl-5-acetonyl-7-hydroxychromone	C13 H12 O4	232.073	1.433		S4477789	HMDB0030813			level4	Organoheterocyclic compounds	Benzopyrans	1-benzopyrans		918909	855789	1.10922e+06	967078	1.02246e+06	885497	1.0655e+06	981197	1.02049e+06	917221	916551	68909.9	2.72156e+06	69967.6	76814.9	54344.8	1.30374e+06	4.61529e+06	5.56668e+06	1.33059e+06	4.34422e+06	56850.1	67028.5	397041	1.48643e+06	1.30589e+06
1.435_589.3604		C37 H51 N O3 S	589.36	1.435						level5					2.36944e+06	1.99718e+06	2.07191e+06	2.437e+06	2.18213e+06	2.2015e+06	2.37398e+06	2.23367e+06	2.27297e+06	1.89242e+06	2.39837e+06	1.25775e+06	2.07459e+06	2.27741e+06	6.97209e+06	1.17286e+06	2.08695e+06	3.37144e+06	2.31178e+06	1.78204e+06	2.29387e+06	118152	137081	2.87021e+06	440683	4.80774e+06
1.435_820.559		C36 H82 N6 O10 P2	820.559	1.435						level5					8.27793e+06	5.10854e+06	8.5529e+06	7.57739e+06	7.9469e+06	6.55571e+06	7.65892e+06	8.91357e+06	5.67494e+06	6.7708e+06	8.38192e+06	6.53297e+06	7.12282e+06	1.06524e+07	9.59107e+06	9.16753e+06	8.50282e+06	9.94567e+06	1.02331e+07	2.26357e+07	9.67982e+06	1.39075e+07	4.6053e+06	6.89975e+06	9.14354e+06	4.46307e+06
1.44_325.2608		C19 H35 N O3	325.261	1.44						level5					555293	577982	600792	634587	564492	515786	596165	536158	653406	570086	565579	452257	50176.8	208374	803380	1.25117e+06	725958	961340	497731	632694	536902	363440	389561	561572	683499	691606
1.443_430.2669		C21 H38 N2 O7	430.267	1.443						level5					1.78149e+07	1.74815e+07	1.77424e+07	1.84865e+07	1.98519e+07	1.61568e+07	1.84836e+07	1.72069e+07	1.79735e+07	1.81741e+07	1.87851e+07	1.26292e+07	3.11825e+07	1.85717e+07	3.11865e+07	2.54987e+07	2.34082e+07	2.38001e+07	2.55783e+07	2.81699e+07	2.02406e+07	2.75247e+07	4.49548e+07	1.14232e+07	1.98362e+07	2.45302e+07
1.444_289.0613		C11 H15 N O6 S	289.061	1.444						level5					475859	413884	373698	459732	415249	426266	433718	448921	427402	389630	445735	84211.8	41108.8	2.47098e+06	892957	1.44419e+06	564938	54650.3	35137.3	457070	38661.2	59354.2	57385.6	190691	48439.9	387558
1.444_484.3176	Propapyriogenin a2	C30 H44 O5	484.318	1.444	C08971	S390516				level4	Terpenoids	Triterpenoids (C30)	Oleananes	NULL	1.19736e+06	928111	1.01967e+06	984866	1.12816e+06	980131	1.09788e+06	968484	1.04723e+06	987114	1.15065e+06	1.4287e+06	2.10331e+06	4.24585e+06	2.81701e+06	1.08128e+06	665332	73673.9	74250.2	343610	173469	82761.7	104593	1.36197e+06	88299.1	485930
1.447_822.5743		C50 H74 N6 O4	822.574	1.447						level5					6.92298e+06	6.69986e+06	6.62718e+06	7.62643e+06	6.46305e+06	6.85711e+06	6.86428e+06	6.84499e+06	6.86424e+06	6.86297e+06	6.85161e+06	1.61064e+06	7.69483e+06	1.73434e+07	4.73932e+06	1.30947e+07	1.02238e+07	7.39283e+06	1.39705e+07	1.59575e+07	1.32342e+07	8.20143e+06	5.26838e+06	8.86384e+06	7.23976e+06	6.15258e+06
1.451_895.6068	[similar to: 4-nitrophenyl 2-acetamido-2-deoxy-α-d-glucopyranoside; δmass: 553.5005 da]		895.607	1.451						level5					2.83521e+06	2.30867e+06	2.47192e+06	2.42146e+06	2.62737e+06	2.6397e+06	2.57812e+06	2.52816e+06	2.62614e+06	2.49389e+06	2.48192e+06	2.70769e+06	2.15365e+06	2.54929e+06	2.39137e+06	2.61719e+06	2.52479e+06	2.93447e+06	2.07289e+06	3.37088e+06	2.03453e+06	4.26714e+06	4.63785e+06	2.45945e+06	5.08147e+06	1.61299e+06
1.451_897.6214		C54 H84 N5 O4 P	897.621	1.451						level5					1.3277e+06	1.13029e+06	1.21703e+06	1.31889e+06	1.21711e+06	1.25157e+06	1.28155e+06	1.21669e+06	1.27143e+06	1.2572e+06	1.20458e+06	2.50661e+06	1.75032e+06	1.62409e+06	1.59482e+06	3.45485e+06	1.86796e+06	1.79856e+06	1.02262e+06	1.45248e+06	946608	1.30663e+06	1.62667e+06	1.91343e+06	1.7181e+06	847141
1.456_138.0426	Urocanic acid	C6 H6 N2 O2	138.043	1.456	C00785	MReference-770	HMDB0000301	35.2	79.8	level2	Organoheterocyclic compounds	Azoles	Imidazoles	map00340 Histidine metabolism; map01100 Metabolic pathways;	3.82313e+08	3.80833e+08	3.76773e+08	3.84206e+08	3.79107e+08	3.82748e+08	3.82201e+08	3.81287e+08	3.66339e+08	3.95027e+08	3.79885e+08	7.62399e+08	3.76083e+08	2.27958e+08	7.69086e+08	4.43291e+08	2.93768e+08	4.43054e+08	1.7987e+08	2.54947e+08	1.82918e+08	4.06838e+08	5.73666e+08	6.31866e+08	5.2031e+08	3.22456e+08
1.456_298.067	Zaltoprofen	C17 H14 O3 S	298.067	1.456		S5518				level4					1.52852e+06	1.43044e+06	1.48929e+06	1.50368e+06	1.45535e+06	1.47726e+06	1.49211e+06	1.50081e+06	1.40193e+06	1.60672e+06	1.42511e+06	5.28541e+06	1.21482e+06	603494	5.64402e+06	1.75316e+06	948866	2.27217e+06	479647	745936	430581	1.335e+06	1.79077e+06	2.93879e+06	2.4517e+06	868509
1.458_448.256		C24 H36 N2 O6	448.256	1.458						level5					46919.6	47524.8	47454.7	47401.7	48362.5	47799.5	46987	50063.1	44648.2	47188.1	48757	72899.9	50345.9	38304.9	82204	66994	42677.3	51901	43460.2	45494.5	38958.2	60760.8	73121.5	67827.1	61353.9	49438.7
1.459_206.0299		C6 H13 N2 P3	206.03	1.459						level5					3.59161e+06	3.73143e+06	3.39167e+06	3.75358e+06	3.557e+06	3.42555e+06	3.60579e+06	3.51862e+06	3.55523e+06	3.77935e+06	3.52079e+06	6.22977e+06	2.78591e+06	1.71631e+06	6.36067e+06	3.04569e+06	2.26942e+06	3.12548e+06	1.99026e+06	2.6487e+06	1.7787e+06	2.67061e+06	3.28624e+06	4.18676e+06	3.27175e+06	3.2309e+06
1.459_223.02		C5 H12 N3 O P3	223.02	1.459						level5					3.2695e+06	3.2926e+06	3.05519e+06	3.147e+06	3.40249e+06	3.07986e+06	3.23105e+06	3.20616e+06	3.08914e+06	3.42247e+06	3.17604e+06	5.44212e+06	2.22544e+06	1.43622e+06	6.32556e+06	2.46238e+06	1.92844e+06	2.63133e+06	1.96807e+06	2.59094e+06	1.72886e+06	2.18348e+06	2.18542e+06	3.54601e+06	2.709e+06	2.52012e+06
1.464_209.0142		C9 H7 N O3 S	209.014	1.464						level5					6.26969e+06	6.50906e+06	6.43981e+06	6.47735e+06	6.60235e+06	7.18407e+06	6.17958e+06	6.43132e+06	6.03774e+06	7.20996e+06	6.36287e+06	1.35023e+07	6.47354e+06	2.13207e+06	4.33315e+06	1.76507e+06	5.48435e+06	2.9923e+06	2.01586e+06	4.17558e+06	2.54061e+06	2.14086e+06	5.20641e+06	1.58346e+07	7.07963e+06	9.03385e+06
1.465_165.0246	4-(isothiocyanatomethyl)phenol	C8 H7 N O S	165.025	1.465		S141134	HMDB0032580			level4	Benzenoids	Phenols	1-hydroxy-2-unsubstituted benzenoids		1.72938e+06	1.81052e+06	1.42291e+06	1.85667e+06	1.83567e+06	1.44291e+06	1.52568e+06	2.03517e+06	1.56277e+06	1.99528e+06	1.44439e+06	3.02981e+06	1.75547e+06	524517	1.24663e+06	623717	1.43637e+06	698606	554950	1.13625e+06	869928	663384	1.53989e+06	3.37513e+06	1.826e+06	2.18608e+06
1.466_365.2554		C21 H35 N O4	365.255	1.466						level5					1.57439e+06	1.51438e+06	1.76663e+06	1.9163e+06	1.71017e+06	1.82382e+06	1.52631e+06	1.72901e+06	1.67351e+06	1.77636e+06	1.63901e+06	1.39931e+06	2.91304e+06	1.94025e+06	1.92956e+06	2.31003e+06	3.41779e+06	2.73608e+06	1.62096e+06	2.9426e+06	1.83685e+06	3.03845e+06	3.11922e+06	1.23759e+06	3.84151e+06	2.17516e+06
1.467_320.1114		C14 H16 N4 O5	320.111	1.467						level5					6.28545e+06	6.30739e+06	6.21408e+06	5.70428e+06	6.34807e+06	6.08554e+06	6.32517e+06	5.90616e+06	6.1409e+06	6.06985e+06	6.4585e+06	206161	7.41483e+06	1.94216e+06	226784	159503	5.11837e+06	1.68956e+07	1.24958e+07	4.53121e+06	9.73449e+06	168089	193568	1.05038e+06	1.54483e+07	3.00445e+06
1.47_383.1069	Succinyladenosine	C14 H17 N5 O8	383.107	1.47		S17216022	HMDB0000912			level4	Nucleosides, nucleotides, and analogues	Purine nucleosides	null		6.36457e+06	6.1814e+06	6.23409e+06	6.25216e+06	6.70438e+06	6.57606e+06	5.99178e+06	5.77169e+06	6.15758e+06	8.106e+06	5.64985e+06	122616	6.1654e+06	1.69841e+06	159418	121159	4.22259e+06	1.626e+07	2.05679e+07	6.20086e+06	1.2408e+07	115889	168794	1.25967e+06	9.19085e+06	3.87463e+06
1.475_340.2221		C15 H28 N6 O3	340.222	1.475						level5					400818	406041	412700	396348	477893	378602	529107	357514	388072	486173	393022	67114.8	117667	129806	304079	137600	598315	104295	403221	612927	200490	194774	247128	1.25296e+06	84780.4	300345
1.481_508.3131		C24 H51 N2 O3 P3	508.313	1.481						level5					53483.4	54173.2	54093.3	54032.8	55128.1	54486.3	53560.2	57066.6	50894.1	53789.3	55577.8	81524.2	51776	38203.1	86684.5	66633.6	48647.5	59161.6	49540	51858.8	42171.6	69260.8	83350.6	77315.7	69936.9	54621.8
1.483_468.2823		C24 H40 N2 O7	468.282	1.483						level5					42191.5	41705.6	42683.4	41799.3	42154	42102.9	42101.4	42126	42202.6	41853.1	42242.7	61808.1	33884.8	29711.5	52093.8	47955.8	38900.2	45081.2	33180.8	41274.4	28455.4	45877.5	60576.9	59451.7	45373.5	41572.7
1.484_423.1975	2-(4-chlorophenyl)-1-{4-[2-(diethylamino)ethoxy]phenyl}-1-phenylethanol	C26 H30 Cl N O2	423.197	1.484	C15067	S210934				level4				NULL	588753	566901	579942	508396	539356	577625	580561	518093	600536	562456	544086	940753	934841	1.23138e+06	1.73764e+06	919435	646479	942851	667917	564945	631307	1.19475e+06	809123	569653	650842	625782
1.487_406.2671		C19 H38 N2 O7	406.267	1.487						level5					2.75723e+07	2.76542e+07	2.69062e+07	2.91659e+07	2.86673e+07	2.63063e+07	2.35644e+07	3.29509e+07	2.76389e+07	2.67691e+07	2.7013e+07	2.73143e+07	5.61202e+07	4.82901e+07	4.71871e+07	5.63555e+07	4.14229e+07	3.82603e+07	5.23903e+07	4.91089e+07	3.72094e+07	5.66496e+07	4.47322e+07	2.2604e+07	3.80306e+07	3.15951e+07
1.493_452.2877		C24 H40 N2 O6	452.288	1.493						level5					2.46233e+06	2.40222e+06	2.37183e+06	2.37957e+06	2.46992e+06	2.13293e+06	2.48203e+06	2.32046e+06	2.45106e+06	2.38682e+06	2.42406e+06	1.58814e+06	3.1882e+06	1.28111e+06	5.22966e+06	1.8752e+06	1.78889e+06	2.05348e+06	1.45756e+06	1.6284e+06	1.75522e+06	3.39185e+06	1.12697e+07	1.67134e+06	1.88389e+06	2.43108e+06
1.497_389.2922	4-{(z)-[(5e,8z,11z,14z)-1-hydroxy-5,8,11,14-icosatetraen-1-ylidene]amino}butanoic acid	C24 H39 N O3	389.292	1.497		S59693703				level4					2.13404e+06	2.09441e+06	2.14169e+06	2.14533e+06	2.20474e+06	2.13822e+06	2.14167e+06	2.08054e+06	2.16735e+06	2.20676e+06	2.10387e+06	1.07641e+06	3.38724e+06	1.16775e+06	4.70149e+06	1.98341e+06	1.59614e+06	1.89286e+06	1.07384e+06	1.36458e+06	1.64604e+06	2.83731e+06	1.26174e+07	1.6122e+06	1.94481e+06	2.26886e+06
1.497_424.2562		C16 H37 N6 O5 P	424.256	1.497						level5					29788.3	33258.1	41647.4	27569.8	30516.3	35200.7	32430	33198.5	29517.1	35925.6	31288.6	40612.1	28560.9	26505.7	33904.1	32356.3	35729	44081.8	31426.9	35192.1	29611.8	40386.6	46317.7	60683.4	72300.1	33682.4
1.501_340.2607	Prostaglandin e1 alcohol	C20 H36 O4	340.261	1.501		S4446181				level4					4.38586e+06	4.56756e+06	4.84186e+06	4.47681e+06	5.59844e+06	4.66696e+06	4.67935e+06	4.48537e+06	4.64202e+06	5.3952e+06	4.41881e+06	5.32479e+06	5.7794e+06	4.67531e+06	6.15682e+06	6.76797e+06	4.58586e+06	6.71213e+06	2.95261e+06	3.80436e+06	3.26075e+06	9.18402e+06	6.03075e+06	7.78095e+06	3.51064e+06	9.15951e+06
1.504_188.1409	Myrmicacin	C10 H20 O3	188.141	1.504		S24790				level4					1.01696e+06	952917	941231	953468	976019	961539	967115	979801	960831	1.04838e+06	896610	1.58108e+06	3.72593e+06	1.86355e+06	1.38138e+06	2.47148e+06	1.27074e+06	369566	1.50706e+06	1.1021e+06	2.33019e+06	2.71532e+06	2.36659e+06	1.24366e+06	897490	1.17439e+06
1.506_404.2515		C19 H36 N2 O7	404.252	1.506						level5					4.74102e+06	4.6071e+06	4.3536e+06	4.51e+06	4.84449e+06	4.70087e+06	4.54044e+06	4.41606e+06	5.28845e+06	3.92078e+06	4.93418e+06	4.04976e+06	5.81271e+06	6.62414e+06	8.76638e+06	1.21646e+07	8.38722e+06	6.54559e+06	5.02668e+06	7.55907e+06	4.62591e+06	1.80876e+06	2.95644e+06	2.00217e+06	3.70727e+06	7.63271e+06
1.516_606.4122		C31 H54 N6 O6	606.412	1.516						level5					31599.2	29535.1	37027.3	27115.5	29137.3	31814	30988.5	27869.6	28240.5	35793.6	31281.3	32531.4	33484.5	29648.8	37834.8	34803.9	35832.1	33649.6	31232.5	35563.7	30770.6	43261.6	51685.8	45740.9	41589.1	69888
1.517_383.3027		C22 H41 N O4	383.303	1.517						level5					35517.6	35233.3	31264.5	29408.3	41827.4	36440.1	36938.4	30181.6	25343.2	32265.7	52284.3	48162.7	42545.8	29954.1	34505.5	36292.8	32612.4	78445	27675.1	36513.2	31033	127156	160696	46628.8	30491.4	33875.8
1.518_506.2976		C27 H42 N2 O7	506.298	1.518						level5					19981.4	23728	24501.4	23170.5	24746.7	21202.3	24869.1	23154.3	24087.3	22676.5	21597.8	19944.1	23429.3	24502.7	22399.1	27691.6	28755.7	28020.2	22051.6	30048.5	23492.2	29602.5	41699.2	37938.9	24608.7	26722.6
1.526_565.3251		C31 H43 N5 O5	565.325	1.526						level5					1.6293e+06	1.26386e+06	1.23505e+06	1.4113e+06	1.30363e+06	1.4293e+06	1.36198e+06	1.13048e+06	1.33647e+06	1.53491e+06	1.45809e+06	1.64919e+06	2.02967e+06	2.18137e+06	3.7116e+06	1.80827e+06	645624	28614.6	536907	586292	531449	38232.7	54415.9	1.05012e+06	32625.1	1.60239e+06
1.53_397.209	Echimidine	C20 H31 N O7	397.209	1.53	C10299	S4445044				level4	Alkaloids	Alkaloids derived from ornithine	Pyrrolizidine alkaloids	NULL	1.18372e+06	1.14139e+06	1.17672e+06	1.17033e+06	1.28411e+06	1.19897e+06	1.15146e+06	1.08991e+06	1.41169e+06	1.18556e+06	1.09805e+06	1.65956e+06	442745	248817	218358	207679	882358	219005	1.03354e+06	524883	733976	3.4842e+06	3.68959e+06	3.99331e+06	165275	3.86234e+06
1.532_459.3552		C25 H49 N O6	459.355	1.532						level5					715764	675995	692942	719408	725548	685899	738129	666751	713746	690004	728941	567324	1.03512e+06	862896	2.19398e+06	1.06484e+06	844680	623908	437012	700804	482556	752505	1.10397e+06	628561	648533	1.12484e+06
1.535_368.2531		C17 H32 N6 O3	368.253	1.535						level5					21577.3	34849.2	22774.4	39395.6	49041.9	28256.6	31709.7	33238.6	20188	28895.2	46675.6	13440.1	16078.6	16852.8	14100.2	16002.9	53879.4	16138.7	22963.4	45073.8	18233.2	20276.5	24736.5	63712.5	21106.9	25376
1.544_437.2038		C16 H32 N5 O7 P	437.204	1.544						level5					295333	503629	284680	512817	327646	324732	321576	375941	393275	373934	353368	213472	70214	69762.6	106015	171874	76627.1	69750.9	68042	95953.4	58276.5	828132	5.53855e+06	670972	141955	621854
1.546_430.3037		C22 H42 N2 O6	430.304	1.546						level5					2.17385e+06	2.10219e+06	2.10631e+06	2.14261e+06	2.13491e+06	2.05971e+06	2.12545e+06	2.17274e+06	2.08713e+06	1.9755e+06	2.29461e+06	1.84147e+06	2.91566e+06	1.71037e+06	4.65936e+06	2.66519e+06	2.22418e+06	2.09197e+06	1.16932e+06	1.88808e+06	1.61305e+06	2.16939e+06	5.93314e+06	1.26535e+06	2.50456e+06	2.04474e+06
1.552_482.2977		C25 H42 N2 O7	482.298	1.552						level5					17277.1	18583.2	16739.9	16651.7	19111.1	16561.2	17564.7	17680	18438.4	16304.4	18022.8	42516.9	21777.7	18847.8	21834.6	24133.7	20816.1	21243.1	71662.6	21647.7	57206.7	24134.5	31072.8	25070.1	19510.6	23384.7
1.558_457.3394		C25 H47 N O6	457.339	1.558						level5					1.11873e+06	1.03284e+06	1.04621e+06	1.06404e+06	1.02926e+06	1.09337e+06	1.00309e+06	1.02623e+06	1.05277e+06	1.0726e+06	1.10301e+06	848774	1.99264e+06	1.10646e+06	2.39294e+06	1.25731e+06	1.48699e+06	798016	779574	1.16354e+06	902671	2.14902e+06	2.46009e+06	1.54274e+06	1.67942e+06	1.79574e+06
1.561_337.2609		C20 H35 N O3	337.261	1.561						level5					66716.2	66716.2	66716.2	66716.2	66716.2	66716.2	66716.2	66716.2	66716.2	66716.2	66716.2	87379.9	65526.5	77209	48917.3	79521.9	69288.7	96694.9	35935.9	83920.1	63351	135436	218209	79454.2	131725	77263.2
1.565_164.0836	4-phenylbutyric acid	C10 H12 O2	164.084	1.565	C21793	MReference-3074	HMDB0000543		51.8	level3	Benzenoids	Benzene and substituted derivatives	null	NULL	1.83121e+06	1.97946e+06	1.90506e+06	1.99234e+06	1.98519e+06	1.8391e+06	1.94481e+06	1.89827e+06	1.90434e+06	1.92234e+06	1.98085e+06	1.85454e+06	9.65722e+06	4.24432e+06	1.54515e+06	8.02837e+06	3.86229e+06	1.46128e+06	740932	2.95558e+06	1.24819e+06	2.40232e+06	4.87207e+06	2.07138e+06	2.23753e+06	3.16957e+06
1.566_433.3395		C23 H47 N O6	433.339	1.566						level5					564444	576035	579719	609671	555710	586934	570328	570131	582343	588716	568741	792449	1.20517e+06	823057	2.48966e+06	999951	698210	474823	795301	786922	582271	1.23481e+06	1.27591e+06	1.02394e+06	1.01387e+06	1.17069e+06
1.57_380.2168	4,4-difluoro-17?-hydroxyandrost-5-en-3-one propionate	C22 H30 F2 O3	380.217	1.57	C15112	S222437				level4				NULL	179054	184094	177401	192770	186318	182952	179797	177600	193834	182352	181402	21227.3	14836.3	23826.7	34802	40143.1	28085.8	5744.88	16767.3	22574.6	8009.66	189874	632495	264225	16101.3	217881
1.58_475.2746	Ulipristal acetate	C30 H37 N O4	475.275	1.58		S115762				level4					3.58312e+06	3.59113e+06	3.55401e+06	3.5928e+06	3.42683e+06	3.58166e+06	3.58705e+06	3.49691e+06	3.65811e+06	3.55134e+06	3.49798e+06	3.92097e+06	6.68814e+06	4.48102e+06	3.48864e+06	5.96065e+06	3.9572e+06	8.06797e+06	2.96023e+06	2.95963e+06	3.3853e+06	5.78071e+06	9.66262e+06	3.88192e+06	4.57758e+06	3.26791e+06
1.58_538.2698		C21 H45 N6 O4 P3	538.27	1.58						level5					1.45626e+06	1.44451e+06	1.48377e+06	1.45952e+06	1.41305e+06	1.46349e+06	1.45458e+06	1.45179e+06	1.42314e+06	1.46453e+06	1.46827e+06	1.69269e+06	3.17821e+06	2.39275e+06	1.18702e+06	3.17335e+06	2.00563e+06	3.4598e+06	1.39891e+06	1.45302e+06	1.94878e+06	3.29383e+06	3.53885e+06	1.39254e+06	2.23158e+06	1.50634e+06
1.581_334.0142	4-[(z)-(6-hydroxy-3-oxo-1-benzofuran-2(3h)-ylidene)methyl]phenyl hydrogen sulfate	C15 H10 O7 S	334.014	1.581		S74854079	HMDB0137537			level4	Phenylpropanoids and polyketides	Aurone flavonoids	null		1.46195e+06	1.50413e+06	1.47426e+06	1.50767e+06	1.52187e+06	1.46822e+06	1.49414e+06	1.56545e+06	1.44655e+06	1.459e+06	1.50742e+06	1.64214e+06	2.23966e+06	1.43046e+06	642118	3.10734e+06	2.5503e+06	2.43464e+06	1.91532e+06	2.29491e+06	2.80773e+06	903967	858264	2.33062e+06	681262	1.28846e+06
1.582_402.2719		C20 H38 N2 O6	402.272	1.582						level5					236034	236034	236034	236034	236034	236034	236034	236034	236034	236034	236034	34236.8	208030	29859.4	399059	497196	114035	13179.2	424102	19782.2	160414	32214.2	511787	17891.8	526735	977678
1.583_403.2752		C21 H41 N O4 S	403.275	1.583						level5					2.98471e+06	2.98471e+06	2.98471e+06	2.98471e+06	2.98471e+06	2.98471e+06	2.98471e+06	2.98471e+06	2.98471e+06	2.98471e+06	2.98471e+06	5.23485e+06	57495.4	473135	155645	5.33707e+06	5.2944e+06	1.00918e+08	23599.2	5.4834e+06	3.7186e+06	1.45376e+07	5.36109e+06	3.58217e+07	3.83828e+06	4.16266e+06
1.585_196.0845	5-nitro-2-propoxyaniline	C9 H12 N2 O3	196.084	1.585		S10647	HMDB0037688			level4	Benzenoids	Benzene and substituted derivatives	Nitrobenzenes		777557	818351	792318	757388	825248	788184	774494	795917	781300	804435	797017	69134.7	1.05841e+06	306094	48874.7	16882.9	945154	4.08506e+06	1.4598e+06	983014	1.00838e+06	77379.6	139400	241340	1.51946e+06	361156
1.588_428.2879		C16 H41 N6 O5 P	428.288	1.588						level5					3.94357e+06	3.98409e+06	4.03031e+06	4.01516e+06	3.86931e+06	4.0038e+06	4.35384e+06	3.65787e+06	3.9577e+06	3.6914e+06	4.42163e+06	4.26004e+06	6.29396e+06	2.51015e+06	5.8263e+06	3.73594e+06	3.83728e+06	2.64644e+06	2.36809e+06	3.09602e+06	3.86678e+06	7.26447e+06	1.59559e+07	3.65008e+06	4.71018e+06	4.27664e+06
1.594_365.2924	N-linoleoyl-4-aminobutyric acid	C22 H39 N O3	365.292	1.594		S4942643	HMDB0062334			level4	Organic acids and derivatives	Carboxylic acids and derivatives	Amino acids, peptides, and analogues		3.6211e+06	3.75841e+06	3.78877e+06	4.03012e+06	3.77937e+06	3.68546e+06	3.33599e+06	4.54433e+06	2.7429e+06	4.26163e+06	4.07667e+06	3.44997e+06	9.13933e+06	2.45113e+06	8.07567e+06	4.12105e+06	5.34118e+06	3.27029e+06	2.5482e+06	3.56072e+06	4.36147e+06	6.67981e+06	3.51893e+07	2.67877e+06	5.71377e+06	4.60709e+06
1.597_160.037	Alpha-ketoadipic acid	C6 H8 O5	160.037	1.597	C00322	S70	HMDB0000225	39.3		level4	Organic acids and derivatives	Keto acids and derivatives	Medium-chain keto acids and derivatives	map00310 Lysine degradation; map00380 Tryptophan metabolism; map01100 Metabolic pathways; map01210 2-Oxocarboxylic acid metabolism; map01230 Biosynthesis of amino acids;	1.79337e+06	1.71696e+06	1.70258e+06	1.93185e+06	1.63425e+06	1.85284e+06	1.75423e+06	1.78096e+06	1.73014e+06	1.86303e+06	1.67265e+06	119596	2.01385e+06	156188	98235	36420.4	2.48089e+06	7.72211e+06	3.10126e+06	2.57689e+06	2.22491e+06	23014.8	25321.2	4.60813e+06	892589	794045
1.602_146.0941	N-butyl lactate	C7 H14 O3	146.094	1.602		S8409	HMDB0040254			level4	Organic acids and derivatives	Carboxylic acids and derivatives	Carboxylic acid derivatives		1.81781e+06	1.68841e+06	1.82761e+06	1.92525e+06	1.84515e+06	1.78259e+06	1.96689e+06	1.73027e+06	2.01447e+06	1.70701e+06	1.76936e+06	2.81225e+06	1.61985e+06	1.48415e+06	1.49042e+06	2.33205e+06	1.9892e+06	1.20353e+06	1.34718e+06	1.52489e+06	1.54416e+06	7.65565e+06	6.86031e+06	3.21046e+06	1.48461e+06	3.08444e+06
1.605_425.2406		C22 H35 N O7	425.241	1.605						level5					3.12481e+06	3.1587e+06	3.08313e+06	3.27142e+06	3.0963e+06	3.11186e+06	3.06075e+06	2.67797e+06	3.01936e+06	4.14537e+06	2.85852e+06	5.32798e+06	7.23542e+06	3.40864e+06	3.40317e+06	4.24146e+06	3.30463e+06	4.82842e+06	2.61033e+06	2.31913e+06	3.58994e+06	6.77432e+06	5.75255e+06	5.8931e+06	5.15067e+06	6.71538e+06
1.606_401.2407	6-hydroxybuspirone	C21 H31 N5 O3	401.241	1.606		S8106544	HMDB0061110			level4	Organoheterocyclic compounds	Diazinanes	Piperazines		3.67185e+06	3.97787e+06	3.92566e+06	3.94946e+06	3.8543e+06	3.72582e+06	3.49284e+06	4.04682e+06	3.88908e+06	4.19093e+06	3.53951e+06	6.2014e+06	7.00898e+06	3.96537e+06	3.64429e+06	3.53646e+06	3.26416e+06	4.47032e+06	3.58441e+06	2.71958e+06	4.34795e+06	9.33023e+06	7.92676e+06	8.82646e+06	6.51302e+06	9.24911e+06
1.612_514.2699		C22 H49 N2 O3 P3 S	514.27	1.612						level5					2.61746e+06	2.78183e+06	2.56982e+06	2.59315e+06	2.51199e+06	2.93164e+06	2.67574e+06	2.54189e+06	2.62942e+06	2.72021e+06	2.60072e+06	3.0378e+06	5.79065e+06	3.93204e+06	2.39962e+06	5.20326e+06	3.00992e+06	4.98885e+06	2.43887e+06	2.17921e+06	3.03104e+06	6.37441e+06	8.53662e+06	2.67004e+06	3.95693e+06	3.44546e+06
1.618_404.2879		C20 H40 N2 O6	404.288	1.618						level5					2.23697e+06	2.09873e+06	2.16645e+06	2.36673e+06	2.2675e+06	2.13253e+06	2.22849e+06	2.15351e+06	2.13784e+06	2.10904e+06	2.45718e+06	2.12414e+06	3.78953e+06	1.86255e+06	4.00057e+06	3.10093e+06	2.26272e+06	1.51705e+06	1.19388e+06	1.85758e+06	1.99796e+06	3.89541e+06	1.02549e+07	1.90222e+06	4.05404e+06	2.55136e+06
1.625_351.2402		C20 H33 N O4	351.24	1.625						level5					131212	118093	122925	139882	138811	110342	162177	148968	106757	142188	115217	126333	26540.4	32922.2	40991.6	28031.1	28192.5	40239.7	53153.9	32124.9	20786.9	1.16598e+06	725742	322213	22520.9	487691
1.625_451.2746		C25 H41 N O4 S	451.275	1.625						level5					5.61954e+06	5.53657e+06	5.28126e+06	5.66138e+06	5.38727e+06	5.35001e+06	5.50563e+06	5.33877e+06	5.79322e+06	5.10325e+06	5.73706e+06	4.7883e+06	1.26745e+07	8.44907e+06	6.33798e+06	1.09821e+07	6.35012e+06	1.18897e+07	6.53856e+06	5.27673e+06	5.49736e+06	1.12505e+07	2.78675e+07	5.28154e+06	9.27806e+06	7.71434e+06
1.627_400.2563		C20 H36 N2 O6	400.256	1.627						level5					34699.4	34325.6	36862.1	33262.9	35535.5	35308.5	33242.6	33689	35967	36258.8	34248.3	40533.9	31761.5	38577.8	48392.7	31635.6	27890.3	43352.6	30294.4	28689.7	23079.4	41346.1	41202.8	26320.4	29774.6	34193.7
1.629_158.0941	3683	C8 H14 O3	158.094	1.629	C02975	S208322	HMDB0031307			level4	Organic acids and derivatives	Keto acids and derivatives	Beta-keto acids and derivatives	NULL	540849	500985	532982	494696	581097	531768	471919	502787	533965	588905	508090	632376	312699	280682	230160	447579	285218	216389	330079	335857	409508	2.50458e+06	2.01204e+06	1.02857e+06	275795	714746
1.631_337.2608		C20 H35 N O3	337.261	1.631						level5					44590.3	44590.3	44590.3	44590.3	44590.3	44590.3	44590.3	44590.3	44590.3	44590.3	44590.3	46304.6	42924	39206.1	64012.1	76383.7	54142.7	43616.1	14883.4	54702	32231.4	98830.2	114295	40845.9	42259.9	43856.5
1.631_338.245	(+/-)8(9)-dihet	C20 H34 O4	338.245	1.631		MReference-9841			90.1	level2					1.41662e+07	1.48033e+07	1.37524e+07	1.42289e+07	1.41274e+07	1.47753e+07	1.26426e+07	1.551e+07	1.31736e+07	1.58291e+07	1.34221e+07	2.29925e+07	2.71605e+07	1.51308e+07	1.59646e+07	1.38751e+07	1.14873e+07	1.94978e+07	1.15263e+07	1.09698e+07	1.34429e+07	3.81142e+07	4.27523e+07	3.25421e+07	1.38373e+07	3.88639e+07
1.631_357.2871		C20 H39 N O4	357.287	1.631						level5					45640.7	44265.2	46623.3	46194.9	44608.8	45556.9	45280.4	44711.8	49387.8	42939.3	45163	50988.7	75610.9	48620.1	61894.7	78167.7	62548.9	59163.4	31803.7	29224.1	35315.9	93860.9	250023	34035.1	83032.5	61948.3
1.633_341.2923	N-acetylsphingosine	C20 H39 N O3	341.292	1.633		MReference-1374			61.6	level2					3.41248e+06	3.31418e+06	3.53733e+06	3.516e+06	3.42309e+06	3.44411e+06	3.45213e+06	3.38017e+06	3.51947e+06	3.45603e+06	3.38561e+06	3.39244e+06	5.93823e+06	2.77636e+06	6.73629e+06	3.95405e+06	3.16906e+06	2.79608e+06	1.84351e+06	2.72305e+06	2.78854e+06	5.52958e+06	1.8111e+07	3.38612e+06	5.63827e+06	3.82026e+06
1.64_299.0974		C9 H23 N3 O2 P2 S	299.097	1.64						level5					900077	904746	878090	902906	902414	897418	897426	898567	900341	888028	903433	1.53938e+06	587719	2.04388e+06	1.82517e+06	2.59538e+06	513379	722152	295158	456732	322530	1.08269e+06	1.67425e+06	816135	385168	858153
1.641_214.1201	5-hexyl-2-oxotetrahydro-3-furancarboxylic acid	C11 H18 O4	214.12	1.641		S8551389	HMDB0030984			level4	Organoheterocyclic compounds	Lactones	Gamma butyrolactones		1.94938e+07	1.9943e+07	1.94686e+07	1.99801e+07	1.90538e+07	1.97515e+07	1.963e+07	1.94975e+07	1.93921e+07	1.97807e+07	1.9694e+07	3.84993e+07	1.60533e+07	5.34229e+07	3.65007e+07	6.35151e+07	1.17151e+07	1.88927e+07	7.63864e+06	1.03238e+07	8.34025e+06	2.88438e+07	6.23138e+07	2.14169e+07	1.35364e+07	1.9334e+07
1.642_282.1073	2-aminoadenosine	C10 H14 N6 O4	282.107	1.642	C00939	S65171				level4				NULL	1.16352e+06	1.21336e+06	1.18187e+06	1.1908e+06	1.14529e+06	1.22749e+06	1.17187e+06	1.21569e+06	1.14659e+06	1.23757e+06	1.13858e+06	2.1809e+06	908547	3.00952e+06	2.41249e+06	3.68481e+06	662366	1.05972e+06	394354	611248	455903	1.64559e+06	2.56034e+06	1.03148e+06	614127	1.22543e+06
1.643_334.0503	4-allyl-2-(sulfooxy)phenyl benzoate	C16 H14 O6 S	334.05	1.643		S74853775	HMDB0135248			level4	Phenylpropanoids and polyketides	Depsides and depsidones	null		630919	659294	596435	627168	654835	633202	629854	626646	634622	628792	642042	38708.1	1.60082e+06	50867.3	49669.2	35255.9	695487	1.42549e+06	877011	554218	1.07577e+06	42103.2	41373.2	480957	4.99865e+06	284383
1.644_554.3182		C28 H46 N2 O9	554.318	1.644						level5					69215.5	66669.1	64667	52097.3	68055.5	66310.1	64174.3	64910.9	64774.2	59442.9	67628.6	12199.7	15296.3	10575.4	9968.51	6075.08	10633.7	25711.7	5646.89	7886.81	4791.28	141972	223880	82296.9	4915.46	51311.7
1.648_456.2097		C21 H32 N2 O9	456.21	1.648						level5					1.53227e+06	1.69243e+06	1.44413e+06	1.54761e+06	1.60471e+06	1.56246e+06	1.56175e+06	1.55276e+06	1.55509e+06	1.62033e+06	1.52155e+06	3.78523e+06	1.12694e+06	4.51791e+06	4.28807e+06	4.82889e+06	766116	2.73917e+06	268518	439262	279594	2.77962e+06	3.62087e+06	986341	807763	1.39299e+06
1.649_420.2824		C20 H40 N2 O7	420.282	1.649						level5					33646.5	33263.6	35699.8	32194.2	34372.6	33941	31863.4	33443.1	34611.9	34910.4	32991.4	39183.4	30454.6	37181.7	46541.2	31995.1	32436.2	45325.7	29085.2	37602.5	24234.8	39784.5	39120.8	26057.3	26152.3	32794.3
1.65_456.298		C27 H40 N2 O4	456.298	1.65						level5					41656.9	41182.9	44199.1	39858.9	42555.9	42021.5	39449.3	41405.1	42852.2	43221.7	40845.8	48512.1	37705.1	46585.9	152961	39612.4	40158.5	56116.7	36009.7	46554.8	30004.5	49256.3	43691.5	32260.9	32378.6	40601.8
1.653_305.0851	Convicine	C10 H15 N3 O8	305.085	1.653	C08430	S79389				level4				NULL	9.97921e+07	9.95479e+07	9.81129e+07	9.96277e+07	9.98349e+07	9.93745e+07	9.93809e+07	9.90791e+07	1.00168e+08	9.90007e+07	9.92573e+07	1.16499e+08	8.85126e+07	1.16655e+08	1.38582e+08	9.20909e+07	1.02605e+08	1.24417e+08	8.83866e+07	1.15166e+08	6.88938e+07	1.0722e+08	5.99488e+07	6.29442e+07	7.68833e+07	9.09751e+07
1.653_514.3238		C21 H46 N4 O10	514.324	1.653						level5					341568	369244	321192	298967	286003	344678	308910	311515	323915	337393	330311	509930	229856	770875	1.0139e+06	465484	372928	818065	110214	242516	66798	278960	243475	125740	146967	515743
1.654_242.0896	Thymidine	C10 H14 N2 O5	242.09	1.654	C00214	MReference-1230	HMDB0000273	71.7	91.5	level1	Nucleosides, nucleotides, and analogues	Pyrimidine nucleosides	Pyrimidine 2'-deoxyribonucleosides	map00240 Pyrimidine metabolism; map01100 Metabolic pathways;	3.02406e+08	3.03879e+08	2.99721e+08	3.03566e+08	3.02469e+08	3.02468e+08	3.02367e+08	3.02316e+08	3.01131e+08	3.05614e+08	3.00623e+08	3.92166e+08	2.50289e+08	3.49699e+08	4.49667e+08	2.60127e+08	2.9398e+08	4.81122e+08	1.93825e+08	2.88064e+08	1.57222e+08	3.66383e+08	2.00323e+08	1.78501e+08	2.14574e+08	2.5843e+08
1.655_327.106		C13 H17 N3 O7	327.106	1.655						level5					1.16283e+06	1.21588e+06	1.07932e+06	1.15838e+06	1.16597e+06	1.16865e+06	1.10546e+06	1.19159e+06	1.11267e+06	1.18286e+06	1.16254e+06	1.41957e+06	1.0028e+06	1.40526e+06	1.71439e+06	1.05798e+06	1.14331e+06	1.74602e+06	924166	1.31453e+06	693702	1.40225e+06	781632	765002	873730	1.00403e+06
1.656_310.077		C17 H14 N2 O2 S	310.077	1.656						level5					1.11889e+06	1.25888e+06	1.18747e+06	1.09476e+06	1.14962e+06	1.22013e+06	1.15182e+06	1.17681e+06	1.36136e+06	1.04372e+06	1.11463e+06	1.43213e+06	881837	1.0405e+06	1.78097e+06	786035	1.04232e+06	1.53941e+06	847699	1.19719e+06	607063	1.01767e+06	563458	480101	694350	863844
1.657_498.3292		C20 H47 N6 O6 P	498.329	1.657						level5					564571	602971	563397	580476	560463	580422	578032	555687	588102	584935	567135	1.03475e+06	746469	893845	899014	716249	682429	1.771e+06	340000	483788	239023	943122	391426	597243	657265	716854
1.659_354.0402	Dihydronaringenin-o-sulphate	C15 H14 O8 S	354.04	1.659		S30778503	HMDB0059996			level4	Phenylpropanoids and polyketides	Linear 1,3-diarylpropanoids	Chalcones and dihydrochalcones		1.94912e+06	2.00842e+06	1.84806e+06	1.97962e+06	1.97916e+06	1.85962e+06	1.97971e+06	1.95227e+06	1.99047e+06	1.91089e+06	1.93259e+06	6.21464e+06	4.45297e+06	3.63534e+06	1.41597e+06	4.59171e+06	2.06687e+06	50712.1	3.52873e+06	2.16234e+06	6.10712e+06	45281.7	42429.8	2.11975e+06	269242	1.55092e+06
1.661_254.1875	Prohydrojasmon	C15 H26 O3	254.188	1.661	C18538	S16738647				level4				NULL	894384	809713	898619	896705	572337	933632	891309	865424	684123	797086	908236	791731	428535	355606	398577	271421	551724	420265	486168	531223	388792	2.34908e+06	2.01313e+06	3.6132e+06	423700	3.29544e+06
1.671_499.3606		C26 H49 N3 O6	499.361	1.671						level5					1.8235e+06	1.76117e+06	1.78762e+06	1.78425e+06	1.80102e+06	1.79183e+06	1.79612e+06	1.7876e+06	1.76256e+06	1.84195e+06	1.77284e+06	1.59303e+06	4.04044e+06	3.57633e+06	2.04163e+06	3.31791e+06	3.86506e+06	3.68444e+06	3.07681e+06	3.1752e+06	4.18551e+06	4.06693e+06	3.39833e+06	2.13786e+06	3.48256e+06	1.97079e+06
1.68_525.2957	Protoverine	C27 H43 N O9	525.296	1.68	C10817	S391285				level4	Alkaloids	Alkaloids derived by amination reactions	Steroid alkaloids	NULL	1.12133e+06	1.16566e+06	1.06622e+06	1.03944e+06	1.10639e+06	1.15069e+06	1.11623e+06	1.06392e+06	1.17817e+06	1.14679e+06	1.02459e+06	1.90126e+06	3.09084e+06	2.95607e+06	2.41818e+06	3.27904e+06	2.29126e+06	1.33287e+06	1.48169e+06	2.12246e+06	1.1345e+06	159009	283533	3.37427e+06	1.81337e+06	1.94631e+06
1.681_376.2564		C18 H36 N2 O6	376.256	1.681						level5					25809.2	29624.2	33789.5	23424.6	26440	34742.5	27800.6	26237.5	27456.1	30081.4	27683.7	28975.7	46894.3	32838.9	42742.7	26719.2	32039.2	48859.9	25728.6	36562	23816.9	39042.2	36985.3	24968.8	23682	31655.6
1.681_431.3063		C23 H45 N O4 S	431.306	1.681						level5					846459	780013	775533	804012	796265	1.01443e+06	816560	719147	1.19493e+06	640507	772524	1.07198e+06	1.68717e+06	1.64745e+06	655948	1.39248e+06	836744	878400	828989	743127	817194	4.60853e+06	5.4108e+06	1.23211e+06	1.98677e+06	561901
1.69_389.056		C18 H15 N O7 S	389.056	1.69						level5					487605	424603	465661	431787	408808	517149	439956	461405	445686	473522	416963	40820.3	2.13359e+06	120810	38603.7	28418.6	134209	2.22791e+06	264049	109255	385962	38791.8	29582.3	28266.7	681917	324389
1.692_202.1103	N-methyl-1h-indole-3-propanamide	C12 H14 N2 O	202.11	1.692		S5975886	HMDB0032756			level4	Organoheterocyclic compounds	Indoles and derivatives	Tryptamines and derivatives		863314	871301	845411	876718	872301	850568	868479	886682	847881	843919	883165	76553.9	2.6079e+06	811450	92452.4	64028.3	513370	3.97362e+06	818694	462054	773905	78884.8	72070.4	53978.6	1.63066e+06	389802
1.693_429.2905		C23 H43 N O4 S	429.291	1.693						level5					6.5007e+06	6.47484e+06	6.46619e+06	6.41734e+06	6.52049e+06	6.47887e+06	6.48565e+06	6.45395e+06	6.42093e+06	6.59729e+06	6.4264e+06	6.49859e+06	9.35686e+06	8.8232e+06	5.49763e+06	9.82173e+06	6.07964e+06	1.2645e+07	4.65152e+06	5.8014e+06	6.07315e+06	1.16224e+07	2.55589e+07	4.74752e+06	6.1035e+06	7.77786e+06
1.7_492.2858		C25 H41 N4 O4 P	492.286	1.7						level5					2.17144e+06	2.18546e+06	2.14283e+06	2.1943e+06	2.16712e+06	2.17216e+06	2.17227e+06	2.17152e+06	2.17046e+06	2.17738e+06	2.16917e+06	1.89751e+06	3.42969e+06	3.24049e+06	1.81577e+06	4.04372e+06	2.37164e+06	3.93319e+06	1.60982e+06	1.76727e+06	1.80979e+06	4.0232e+06	6.7363e+06	1.68327e+06	3.52917e+06	2.37763e+06
1.705_218.0551		C9 H17 P3	218.055	1.705						level5					951585	946653	1.01816e+06	999190	907648	982928	962574	977790	1.01162e+06	935879	943276	1.16676e+06	1.51616e+06	1.99285e+06	868346	2.35209e+06	1.33224e+06	620966	412188	1.23083e+06	480915	2.29051e+06	1.86877e+06	828838	1.02602e+06	1.1771e+06
1.706_150.0678	3,4-dimethylbenzoic acid	C9 H10 O2	150.068	1.706		MReference-2597	HMDB0002237		87.1	level2	Benzenoids	Benzene and substituted derivatives	Benzoic acids and derivatives		9.68924e+06	9.751e+06	9.82546e+06	1.00949e+07	9.78891e+06	9.92327e+06	9.58788e+06	9.93368e+06	9.92326e+06	9.76846e+06	9.78597e+06	1.33346e+07	1.92341e+07	2.40932e+07	8.21336e+06	2.89879e+07	1.58641e+07	7.23112e+06	4.28806e+06	1.27317e+07	5.0541e+06	3.11957e+07	2.85938e+07	1.17833e+07	1.08799e+07	1.32754e+07
1.707_438.1571		C27 H22 N2 O4	438.157	1.707						level5					28789	24029	26603.8	27364.1	26904.3	26183.6	26971.3	26304	29435.3	26194.2	24999.7	30757.7	32089.7	39607.3	34267.2	31714.9	30034.2	45472.5	26375.6	51786.6	26979.3	51963	32986.6	30830.5	19370.8	27738.4
1.713_309.2298		C18 H31 N O3	309.23	1.713					75.1	level5					86795	91315.7	94016.8	89553.9	86916.3	87771.7	89987.2	85828.3	94572	87518.6	90140.5	66166.3	12517.8	3208.89	3991.74	4010.5	4373.32	5019.31	7313.93	4977.7	7249.76	825866	340841	455341	11385.4	145858
1.719_312.1931	Artemotil	C17 H28 O5	312.193	1.719		S65346				level4					4.95547e+06	4.86351e+06	5.04799e+06	5.10166e+06	4.98981e+06	4.985e+06	5.01465e+06	4.94094e+06	5.2177e+06	4.76962e+06	5.02225e+06	6.10269e+06	7.01703e+06	5.68929e+06	8.94176e+06	8.15481e+06	6.92528e+06	5.7134e+06	3.73611e+06	5.21098e+06	4.36375e+06	4.85033e+06	7.1753e+06	8.99833e+06	6.49448e+06	6.59811e+06
1.722_321.0802		C10 H15 N3 O9	321.08	1.722						level5					4.38935e+06	4.51043e+06	4.29072e+06	4.35023e+06	4.48446e+06	4.42928e+06	4.33235e+06	4.3869e+06	4.55774e+06	4.20507e+06	4.50097e+06	6.07517e+06	4.23992e+06	5.57736e+06	7.82277e+06	5.37873e+06	3.50296e+06	3.00518e+06	2.81387e+06	3.1858e+06	2.72789e+06	5.83044e+06	7.18036e+06	4.00655e+06	4.18404e+06	3.37443e+06
1.722_377.2408		C22 H37 N P2	377.241	1.722						level5					2.73617e+06	2.39114e+06	3.60104e+06	2.71189e+06	2.56038e+06	2.77248e+06	2.77367e+06	2.73405e+06	2.80461e+06	2.85062e+06	2.69843e+06	2.24695e+06	1.17218e+07	4.34317e+06	3.67554e+06	5.74664e+06	3.92754e+06	2.84939e+06	3.38038e+06	2.54714e+06	4.2608e+06	8.00046e+06	6.4843e+06	6.15887e+06	4.31363e+06	1.30593e+07
1.723_208.1096	Asarone	C12 H16 O3	208.11	1.723	C17846	S552532	HMDB0031469			level4	Benzenoids	Phenol ethers	Anisoles	NULL	258128	211256	290120	237162	258870	248848	240793	267167	200555	297939	245715	134206	146682	236605	205442	665066	191984	135151	142019	111194	168167	139426	5.61621e+06	324641	235901	513662
1.724_382.2323		C16 H34 N2 O8	382.232	1.724						level5					651050	703551	724317	723433	674385	667418	702564	687607	702172	693285	685167	776595	893164	499352	647701	511950	617521	783994	614967	490304	610478	1.65373e+06	1.26061e+06	1.70756e+06	731323	1.56119e+06
1.728_222.1	Gly-phe	C11 H14 N2 O3	222.1	1.728		S87926	HMDB0028848			level4	Organic acids and derivatives	Carboxylic acids and derivatives	Amino acids, peptides, and analogues		1.64437e+07	1.93789e+07	1.53878e+07	1.57843e+07	1.66442e+07	1.75304e+07	1.72479e+07	1.62748e+07	1.69729e+07	1.72231e+07	1.62952e+07	25675.1	1.97299e+07	4.9825e+06	70893	231850	2.23515e+07	7.8174e+07	6.13936e+07	2.02609e+07	3.98013e+07	255050	36681	3.61683e+06	7.86459e+07	1.11589e+07
1.729_491.3813		C26 H53 N O7	491.381	1.729						level5					10422.4	10422.4	10422.4	10422.4	10422.4	10422.4	10422.4	10422.4	10422.4	10422.4	10422.4	48737.8	54227.1	10356.4	11462	18891.3	11564.5	13339.2	2718.62	6971.59	2484.68	15787.8	7313.96	12697.9	3250.74	17462.6
1.73_432.2983		C19 H41 N6 O3 P	432.298	1.73						level5					16317.2	16339.8	16511.6	15867.1	16390.3	14635	16730.4	15855.4	15663.6	16644	16462.2	16775.4	23012.2	16595.1	18463.8	18683.8	20729.8	21658.1	19009.1	21128.4	16594.5	58450.2	81557.3	20545.1	20889.3	21430.4
1.735_152.0471	2-hydroxyphenylacetic acid	C8 H8 O3	152.047	1.735	C05852	MReference-141	HMDB0000669	70.8	89.1	level2	Benzenoids	Benzene and substituted derivatives	Phenylacetic acids	map00360 Phenylalanine metabolism; map01100 Metabolic pathways;	1.13463e+06	996826	1.14328e+06	1.15218e+06	1.0999e+06	1.08325e+06	1.10426e+06	1.10676e+06	1.14006e+06	1.13267e+06	1.03661e+06	3.52639e+06	2.6548e+06	585623	1.4744e+06	812363	1.02538e+06	273803	600327	927616	920397	690391	2.80396e+06	2.98129e+06	2.48769e+06	1.67206e+06
1.736_454.2665		C17 H39 N6 O6 P	454.267	1.736						level5					12825.3	12846.6	13253.2	12726.9	12856	11639.9	13213.1	11723.2	14817.3	11956	12864.7	12817.4	16896.1	13103.5	13288.1	14001.2	13854.6	17310.8	14928.5	14459.8	13023	18907.7	23824.1	16409.7	15321.8	16972.8
1.747_415.1412		C25 H21 N O5	415.141	1.747						level5					385359	287738	329028	370197	311431	253638	456809	337124	343026	245818	383896	14235.6	3.3576e+06	88608.9	13727.3	14302.5	121792	4.07525e+06	576893	100245	697555	19587.5	23597.2	26385.1	1.03861e+06	358853
1.747_489.3653		C26 H51 N O7	489.365	1.747						level5					8305.16	8233.43	9430.48	8556.6	8506.48	8298.45	8608.59	8324.8	8713.94	8554.06	8657.1	9690.21	22806.6	9695.83	8953.75	10765.7	10794.3	12633.7	11542	10763.4	9900.61	14334.6	18163.1	12176.3	11383.3	12409.4
1.749_165.0424	Am9627000	C8 H7 N O3	165.042	1.749	C02803	S21106581				level4				NULL	4.28085e+06	4.29809e+06	4.19692e+06	4.44784e+06	4.23801e+06	4.28246e+06	4.28563e+06	4.30401e+06	4.30749e+06	4.26421e+06	4.29113e+06	46667	1.58222e+07	1.80246e+06	14164.3	77511.1	2.88829e+06	2.74916e+07	5.96076e+06	2.52203e+06	6.50392e+06	162067	109706	320529	6.91085e+06	2.9569e+06
1.75_427.2748		C23 H41 N O4 S	427.275	1.75						level5					7.03677e+06	7.10637e+06	7.03594e+06	7.16474e+06	6.928e+06	7.05153e+06	7.08944e+06	7.01808e+06	7.13456e+06	7.04649e+06	7.01224e+06	5.92819e+06	1.25232e+07	7.38918e+06	4.53791e+06	8.29433e+06	7.76105e+06	1.17079e+07	5.93893e+06	5.77758e+06	7.10297e+06	2.45949e+07	4.00287e+07	7.42955e+06	1.47172e+07	8.16523e+06
1.752_323.1151	Rutacridone epoxide	C19 H17 N O4	323.115	1.752	C10739	S4445146	HMDB0033853			level4	Organoheterocyclic compounds	Quinolines and derivatives	Benzoquinolines	NULL	876805	945544	858432	868046	910695	881935	902322	898107	854239	891756	916052	11312	1.21567e+07	349575	13322.8	14477.1	545955	1.32642e+07	1.941e+06	565721	3.14764e+06	19228.8	24794.8	37878.2	2.27545e+06	1.13706e+06
1.753_490.2701		C17 H43 N6 O6 P S	490.27	1.753						level5					2.47169e+06	2.53795e+06	2.5533e+06	2.55166e+06	2.45408e+06	2.54303e+06	2.55976e+06	2.42139e+06	2.55907e+06	2.4629e+06	2.5855e+06	2.14149e+06	5.20803e+06	2.99965e+06	1.62646e+06	3.53404e+06	3.25168e+06	4.11272e+06	2.01093e+06	2.13396e+06	2.64462e+06	9.65468e+06	1.23503e+07	2.64513e+06	5.96107e+06	2.92801e+06
1.764_160.0886	2-phenyl-4-pentenal	C11 H12 O	160.089	1.764		S489034	HMDB0035207			level4	Benzenoids	Benzene and substituted derivatives	Phenylacetaldehydes		242340	234900	247291	236820	245193	240103	240442	243435	245518	232110	244408	9309.63	781788	25455.4	9965.63	12017.8	225987	355581	233345	173512	319222	15856.7	81982.3	22355.7	324443	110705
1.772_669.4089		C35 H59 N O11	669.409	1.772						level5					3.72902e+06	4.04997e+06	3.75183e+06	3.84405e+06	3.87742e+06	3.83058e+06	3.80197e+06	3.84557e+06	3.79198e+06	3.83783e+06	3.92138e+06	8.04154e+06	7.7859e+06	6.53688e+06	8.33459e+06	1.12985e+07	4.93453e+06	4.84994e+06	2.83523e+06	3.57974e+06	3.21166e+06	6.42274e+06	3.48208e+06	3.07391e+06	3.32026e+06	8.02241e+06
1.774_606.4123		C36 H54 N4 O4	606.412	1.774						level5					1.25354e+07	1.25266e+07	1.20722e+07	1.25853e+07	1.28787e+07	1.28727e+07	1.31704e+07	1.28071e+07	1.07514e+07	1.35203e+07	1.29352e+07	2.74186e+07	2.7729e+07	2.21509e+07	2.85674e+07	3.72948e+07	1.60923e+07	1.69907e+07	8.7621e+06	1.15765e+07	1.04507e+07	2.3193e+07	1.65766e+07	1.52257e+07	1.49131e+07	2.80935e+07
1.781_413.2042		C20 H31 N O8	413.204	1.781						level5					539174	870720	485392	466776	587380	841701	522847	627830	565160	620687	563570	404454	81688.8	182975	96454	254769	92221.1	102708	104187	62688.8	63061.9	1.80717e+06	1.28234e+07	1.67024e+06	110038	1.38506e+06
1.787_251.04		C6 H9 N3 O8	251.04	1.787						level5					1.17236e+06	1.20094e+06	1.23252e+06	1.29169e+06	1.31341e+06	1.21796e+06	1.16586e+06	1.2853e+06	1.25674e+06	1.13138e+06	1.30765e+06	76775.6	178455	80059.9	58727.2	33761.9	2.04814e+06	90751.9	389265	1.79675e+06	328562	1.17796e+06	83496.5	7.22298e+06	3.13904e+06	100577
1.789_348.206	Roxane	C19 H28 N2 O4	348.206	1.789		S4926	HMDB0015695			level4	Organoheterocyclic compounds	Piperidines	Benzylpiperidines		64378.8	60957.3	63926.3	61034.5	61899.6	62149.3	62756.7	61574.5	64016.6	66763.6	57898.7	18451.9	15047	13891.7	9651.56	8221.01	9077.84	13885.3	8253.74	6826.44	5967.81	202538	108973	314829	10696.9	77775.6
1.792_354.1074		C16 H14 N6 O4	354.107	1.792						level5					31383.5	31383.5	31383.5	31383.5	31383.5	31383.5	31383.5	31383.5	31383.5	31383.5	31383.5	10624.8	8835.85	9065.05	7425.97	7417.74	86693	231393	7444	29376.3	6443.74	32872.9	11010.3	2.39389e+06	250494	10144.9
1.793_120.0573	Acetophenone	C8 H8 O	120.057	1.793	C07113	S7132	HMDB0033910			level4	Organic oxygen compounds	Organooxygen compounds	Carbonyl compounds		3.98808e+07	4.11632e+07	3.89088e+07	3.92872e+07	4.00739e+07	4.19501e+07	3.96028e+07	4.1054e+07	3.96544e+07	3.99432e+07	3.95112e+07	3.59053e+06	8.51202e+06	3.94518e+06	2.57815e+06	2.25915e+06	6.77866e+07	5.25725e+06	1.16949e+07	4.78539e+07	9.72401e+06	5.09812e+07	6.4299e+06	3.09858e+08	1.24476e+08	4.87565e+06
1.793_148.0523	Trans-cinnamate	C9 H8 O2	148.052	1.793	C00423	BGI544	HMDB0000930	90.7	34.3	level1	Phenylpropanoids	Monolignols	Others	map00130 Ubiquinone and other terpenoid-quinone biosynthesis; map00360 Phenylalanine metabolism; map01100 Metabolic pathways;	2.30953e+06	2.11296e+06	2.03607e+06	2.10171e+06	2.22569e+06	2.21594e+06	2.17149e+06	2.16547e+06	2.25221e+06	2.09648e+06	2.12966e+06	156864	402580	208437	118023	94467.3	3.67837e+06	247517	637241	2.62735e+06	477464	2.60061e+06	295837	1.69651e+07	6.61505e+06	200811
1.793_166.0627	3-phenyllactic acid	C9 H10 O3	166.063	1.793	C05607	MReference-311	HMDB0000748	46.4	93.8	level2	Phenylpropanoids and polyketides	Phenylpropanoic acids	null	map00360 Phenylalanine metabolism; map01100 Metabolic pathways;	4.13826e+07	4.24754e+07	4.01302e+07	4.06914e+07	4.1421e+07	4.32946e+07	4.095e+07	4.24233e+07	4.10184e+07	4.12802e+07	4.08836e+07	3.69811e+06	8.76888e+06	4.07722e+06	2.64364e+06	2.31409e+06	7.00611e+07	5.37264e+06	1.21408e+07	4.95783e+07	1.00353e+07	5.25939e+07	6.62941e+06	3.2089e+08	1.28563e+08	4.97304e+06
1.793_466.2703		C21 H42 N2 O7 S	466.27	1.793						level5					2.22239e+06	2.22239e+06	2.22239e+06	2.22239e+06	2.22239e+06	2.22239e+06	2.22239e+06	2.22239e+06	2.22239e+06	2.22239e+06	2.22239e+06	2.41075e+06	4.58475e+06	3.57729e+06	1.59812e+06	4.04704e+06	3.15681e+06	3.80542e+06	2.24143e+06	2.07892e+06	2.4254e+06	8.25313e+06	7.87536e+06	3.06169e+06	5.33838e+06	3.01881e+06
1.798_234.0499	Mfcd00010043	C16 H10 S	234.05	1.798	C20124	S8843				level4				NULL	1.34544e+06	1.33654e+06	1.32079e+06	1.41583e+06	1.44582e+06	1.45424e+06	1.31508e+06	1.43374e+06	1.3357e+06	1.38554e+06	1.36368e+06	120615	244214	109084	79410.5	64789.7	2.37699e+06	124707	505562	2.06214e+06	356683	1.41571e+06	126957	8.27058e+06	3.74649e+06	156914
1.798_304.0972		C7 H21 N4 O5 P S	304.097	1.798						level5					174076	171262	162163	215066	162714	182268	164692	181230	171241	172254	184243	26210.3	62316.4	53039.9	47582.9	43744	309495	15320.4	47584.6	279744	74840.5	213639	24522.3	1.47339e+06	748029	45947.4
1.798_417.2354		C20 H35 N O8	417.235	1.798						level5					7.46299e+06	7.34704e+06	9.40001e+06	6.93156e+06	7.43201e+06	7.31245e+06	8.81823e+06	6.585e+06	7.94417e+06	7.48603e+06	8.15767e+06	1.15781e+07	9.79455e+06	4.20193e+06	3.83951e+06	2.93737e+06	3.33516e+06	6.22003e+06	4.62738e+06	2.51722e+06	5.33104e+06	2.28891e+07	1.74681e+07	2.08626e+07	6.41859e+06	1.90949e+07
1.801_397.1671		C26 H23 N O3	397.167	1.801						level5					26337.5	20352.3	16352.1	29124.4	30835.3	25972.5	16592.9	28803.4	27953.4	19161.5	24527.4	29153	15288.2	14698.2	16379.3	13227.3	13339.7	18236	22401.2	11769.6	10011	19401.5	21906	30690	19214.9	16153.3
1.801_473.3092		C23 H43 N3 O7	473.309	1.801						level5					25094.1	19862.3	16337.9	16562.3	32222.6	17541.7	19218	26357.3	24143.4	16263.5	20460.6	16937.4	17417.2	17414.8	20494.6	16710.5	15748.2	19213.7	14109.3	10351.4	9364.59	24034	18634	35692.1	19321.5	19942.9
1.805_294.1033		C14 H18 N2 O3 S	294.103	1.805						level5					453653	453653	453653	453653	453653	453653	453653	453653	453653	453653	453653	28869.4	64142.2	3.44262e+06	210012	1.39653e+06	1.33984e+06	164546	349433	1.11481e+06	388874	672440	26027.5	562570	135412	83017.2
1.806_133.056	(1e)-n-hydroxy-4-(methylsulfanyl)-1-butanimine	C5 H11 N O S	133.056	1.806	C17241	S24784893				level4				map01210 2-Oxocarboxylic acid metabolism;	1.15358e+06	1.15358e+06	1.15358e+06	1.15358e+06	1.15358e+06	1.15358e+06	1.15358e+06	1.15358e+06	1.15358e+06	1.15358e+06	1.15358e+06	1.23869e+06	8.66358e+06	6.17719e+06	2.39816e+06	2.15035e+06	4.66439e+06	1.25328e+06	7.83487e+06	8.39727e+06	4.02097e+06	3.62565e+06	3.81343e+06	1.24776e+06	6.62201e+06	2.75179e+06
1.806_303.081		C9 H13 N5 O7	303.081	1.806						level5					1.56551e+06	1.61114e+06	1.45281e+06	1.51655e+06	1.75704e+06	1.57617e+06	1.53779e+06	1.61566e+06	1.46208e+06	1.58707e+06	1.6489e+06	2.46576e+06	1.57403e+06	2.25346e+06	3.85221e+06	2.52917e+06	1.15601e+06	1.21271e+06	1.00493e+06	1.10881e+06	1.0828e+06	353421	295494	1.21003e+06	1.0678e+06	858874
1.808_181.0229		C5 H11 N O2 S2	181.023	1.808						level5					567976	567976	567976	567976	567976	567976	567976	567976	567976	567976	567976	645935	4.69787e+06	3.29552e+06	1.353e+06	1.10126e+06	2.40199e+06	625474	3.91544e+06	4.15109e+06	2.05327e+06	2.04241e+06	2.43511e+06	654221	3.24834e+06	1.39728e+06
1.808_350.2089	(-)-andrographolide	C20 H30 O5	350.209	1.808	C20214	S4477067			81.9	level4	Terpenoids	Diterpenoids (C20)	Labdanes	NULL	720709	544760	909314	750815	676302	695840	667087	856929	628171	732270	673810	454599	93913.6	155048	152010	329063	78337.1	99858	74869	100142	67177.7	2.33522e+06	862577	3.23038e+06	70146.2	1.63278e+06
1.808_403.2749		C21 H41 N O4 S	403.275	1.808						level5					8.09276e+06	8.42628e+06	8.0254e+06	8.06131e+06	8.37448e+06	8.62303e+06	8.0575e+06	8.47629e+06	7.85724e+06	8.61187e+06	8.00543e+06	8.58573e+06	1.46195e+07	1.12671e+07	6.50907e+06	1.30977e+07	9.93638e+06	1.44971e+07	7.65247e+06	7.71143e+06	8.35319e+06	2.76732e+07	3.4501e+07	1.13872e+07	1.22958e+07	1.07029e+07
1.81_235.1203	N-methylanhalonine	C13 H17 N O3	235.12	1.81	C09573	S390773				level4	Alkaloids	Alkaloids derived from tyrosine	Isoquinoline alkaloids	NULL	465882	481986	316908	798288	455725	491981	456587	448238	506849	562633	417981	180766	455831	284656	456873	353551	263566	368627	1.16412e+06	183357	789326	169856	572315	95120.7	83826.2	274715
1.81_240.0854		C9 H12 N4 O4	240.085	1.81						level5					1.60893e+06	1.61047e+06	1.60382e+06	1.58793e+06	1.62179e+06	1.6066e+06	1.6063e+06	1.60102e+06	1.62766e+06	1.59232e+06	1.60536e+06	2.65697e+06	1.57184e+06	2.27904e+06	3.23777e+06	2.21686e+06	1.32773e+06	1.55927e+06	793402	1.18116e+06	897363	1.08561e+06	1.72115e+06	1.26309e+06	1.2361e+06	1.13955e+06
1.81_355.2432		C13 H33 N5 O6	355.243	1.81						level5					2.78639e+06	2.2294e+06	2.50482e+06	2.91484e+06	1.991e+06	2.56078e+06	2.56754e+06	2.63781e+06	2.28265e+06	2.60707e+06	2.39311e+06	4.32463e+06	3.23987e+06	1.15333e+06	882945	781401	1.11329e+06	1.90934e+06	1.7879e+06	1.05968e+06	2.42521e+06	8.36975e+06	9.7842e+06	8.33748e+06	1.72153e+06	6.27772e+06
1.812_486.3335	Quillaic acid	C30 H46 O5	486.334	1.812	C08972	S91986				level4	Terpenoids	Triterpenoids (C30)	Oleananes	NULL	984234	919951	994980	972194	1.00614e+06	980290	968977	1.00376e+06	948814	1.01242e+06	941192	1.57935e+06	2.33154e+06	3.57091e+06	1.4967e+06	3.41809e+06	613042	28545.5	170047	263569	521400	28379.7	32413.5	754189	53501.6	642569
1.818_432.2823		C21 H40 N2 O7	432.282	1.818						level5					44623.8	36761.1	27000.2	46214.3	48325.6	38919.6	30889.1	42124.9	44863.1	36222.2	39271.3	45845.9	25337.3	16654.2	30125.2	18357.2	14694.5	22940.8	42300	13604.3	13124.2	22019	37863.3	27014.5	49537.9	19946.2
1.819_410.3141		C17 H43 N6 O3 P	410.314	1.819						level5					80623.8	75996	62839.3	61003.1	84056.8	72835.9	66505.7	74384.7	76427.5	68893.7	72761.9	87040.6	35125.1	49457.2	71466.1	50471.1	37033.3	48620.6	60328	39794.2	38627.9	56478.2	53446.2	55324.8	70287.2	47977
1.822_329.2424		C15 H31 N5 O3	329.242	1.822						level5					267696	241078	199466	304917	318481	402543	305423	154919	287159	268822	353153	283432	703980	382560	444819	545341	533269	450185	216549	209739	225050	650579	436296	581889	373163	395895
1.826_354.2398	8-iso-13,14-dihydro-15-keto prostaglandin f2α	C20 H34 O5	354.24	1.826		MReference-9854			86.1	level2					8.59478e+06	1.14177e+07	9.95911e+06	1.19266e+07	1.00997e+07	1.10369e+07	1.00531e+07	1.22474e+07	9.23097e+06	9.80324e+06	1.05748e+07	2.32109e+07	1.37985e+07	6.14693e+06	3.84574e+06	5.93004e+06	5.43602e+06	8.29473e+06	7.05153e+06	3.85365e+06	5.36644e+06	5.20046e+07	6.46593e+07	4.2763e+07	9.19739e+06	3.79807e+07
1.834_242.0799	Lumichrome	C12 H10 N4 O2	242.08	1.834	C01727	S4483963				level4				map00740 Riboflavin metabolism;	8.40091e+06	7.91135e+06	7.92689e+06	7.52252e+06	7.7806e+06	8.67779e+06	7.95808e+06	8.54268e+06	6.55128e+06	8.63698e+06	8.28901e+06	1.32676e+07	6.92192e+06	1.09994e+07	1.07504e+07	9.53461e+06	8.07596e+06	9.53437e+06	4.41688e+06	6.36495e+06	5.64645e+06	9.87857e+06	1.38322e+07	9.21792e+06	7.93058e+06	6.94977e+06
1.842_312.1467	Mfcd00020424	C18 H20 N2 O3	312.147	1.842		S58614				level4					1.34292e+06	1.36225e+06	1.32789e+06	1.35059e+06	1.34893e+06	1.34654e+06	1.34631e+06	1.34697e+06	1.34601e+06	1.34593e+06	1.34705e+06	1.20486e+06	1.28865e+06	1.61587e+06	1.42492e+06	1.826e+06	1.81346e+06	2.93309e+06	1.13857e+06	1.36679e+06	1.02675e+06	973098	975185	697109	585780	889407
1.842_401.2591		C21 H39 N O4 S	401.259	1.842						level5					2.11574e+06	2.6071e+06	2.13661e+06	2.10522e+06	2.67551e+06	2.52546e+06	2.22444e+06	2.3246e+06	2.33264e+06	2.32977e+06	2.30711e+06	3.17051e+06	2.75654e+06	3.20272e+06	2.55629e+06	4.65086e+06	2.81907e+06	4.55524e+06	1.95949e+06	1.87602e+06	1.96088e+06	1.2665e+06	3.34007e+06	1.44781e+06	2.58229e+06	4.14295e+06
1.85_201.0456		C8 H11 N O3 S	201.046	1.85						level5					580391	537343	581858	599006	565849	639612	568372	573602	552192	596915	577285	94996.4	222259	1.03546e+06	241347	373571	431724	425496	474356	342156	410995	4.40273e+06	413036	2.70254e+06	383056	1.49165e+06
1.853_300.0715	Î²-d-3-ribofuranosyluric acid	C10 H12 N4 O7	300.072	1.853	C05513	S144595	HMDB0029920			level4	Organoheterocyclic compounds	Imidazopyrimidines	Purines and purine derivatives	map00230 Purine metabolism; map01100 Metabolic pathways;	464137	522073	411410	445438	419575	499698	494663	424147	488745	448962	442838	62137.1	832592	61205	59451.5	55891	455757	1.14944e+06	272294	164284	338126	287572	56557	2.18724e+06	3.05947e+06	163622
1.862_180.0144		C4 H11 N2 P3	180.014	1.862						level5					7.95467e+06	7.97225e+06	8.12613e+06	7.79479e+06	8.26316e+06	7.96385e+06	7.99082e+06	7.99186e+06	8.26579e+06	7.85317e+06	7.9656e+06	8.5131e+06	8.29907e+06	8.38152e+06	1.00388e+07	8.64181e+06	8.36631e+06	5.99549e+06	9.84989e+06	9.44129e+06	8.39655e+06	8.07739e+06	8.27383e+06	7.11507e+06	7.96815e+06	7.99876e+06
1.863_301.0941	1,5-dihydroxy-3,4-dimethoxy-10-methyl-9(10h)-acridinone	C16 H15 N O5	301.094	1.863		S4589521	HMDB0030374			level4	Organoheterocyclic compounds	Quinolines and derivatives	Benzoquinolines		109339	112464	88386.6	117189	73152.4	109436	131895	94100.4	95283.2	130734	77559.9	70370.4	196162	74753.9	77135.8	77033.8	68114.7	391604	78840.7	85312.6	104493	79403.8	94472	254222	3.63945e+06	63506.3
1.865_415.1412		C19 H22 N5 O4 P	415.141	1.865						level5					275820	281940	263414	264011	286480	274242	274450	269902	264444	310001	254872	72758.7	1.09993e+06	58372.8	59913	69279.6	134043	5.68339e+06	1.55819e+06	100525	1.64038e+06	60781	162071	56887.2	1.41968e+06	216631
1.869_246.0357		C5 H6 N6 O6	246.036	1.869						level5					2.39736e+07	2.37479e+07	2.43095e+07	2.32152e+07	2.44445e+07	2.39069e+07	2.38435e+07	2.40289e+07	2.44522e+07	2.36016e+07	2.37223e+07	3.30546e+07	2.45732e+07	3.17778e+07	3.37182e+07	2.94041e+07	2.09405e+07	1.87699e+07	1.65396e+07	1.90093e+07	1.81403e+07	3.06308e+07	2.78785e+07	2.5865e+07	2.84084e+07	2.05378e+07
1.87_111.9955	[similar to: orotic acid; δmass: -44.0216 da]		111.996	1.87						level5					1.62709e+06	1.62709e+06	1.62709e+06	1.62709e+06	1.62709e+06	1.62709e+06	1.62709e+06	1.62709e+06	1.62709e+06	1.62709e+06	1.62709e+06	1.62776e+07	1.33788e+06	1.21818e+08	1.29944e+06	38579.5	148362	4.62667e+07	4.1443e+07	2.40311e+06	3.03571e+07	2.42022e+07	4.0821e+06	2.22828e+07	5.99941e+06	555514
1.871_112.0271	Uracil	C4 H4 N2 O2	112.027	1.871	C00106	MReference-2531	HMDB0000300		89.5	level2	Organoheterocyclic compounds	Diazines	Pyrimidines and pyrimidine derivatives	map00240 Pyrimidine metabolism; map00410 beta-Alanine metabolism; map00770 Pantothenate and CoA biosynthesis; map01100 Metabolic pathways;	7.95826e+08	7.87643e+08	7.93142e+08	7.87978e+08	7.98801e+08	7.68274e+08	7.91979e+08	8.06902e+08	7.56102e+08	7.93634e+08	8.11155e+08	9.69634e+08	8.99298e+08	9.82079e+08	9.96641e+08	9.7212e+08	7.52101e+08	6.7731e+08	7.13462e+08	7.67649e+08	7.41468e+08	1.03355e+09	1.10836e+09	9.15726e+08	9.22756e+08	7.09772e+08
1.873_262.0095	1712536	C6 H15 O5 P S2	262.01	1.873	C18979	S26248				level4				NULL	1.14642e+06	1.11571e+06	1.11667e+06	1.09599e+06	1.12451e+06	1.16531e+06	1.1066e+06	1.20787e+06	1.07212e+06	1.13067e+06	1.10237e+06	1.65014e+06	1.19644e+06	1.55308e+06	1.52053e+06	1.33352e+06	1.04976e+06	972569	810516	957987	918703	1.46924e+06	1.27673e+06	1.22435e+06	1.40678e+06	879662
1.875_197.0044		C3 H10 N3 O P3	197.004	1.875						level5					1.18936e+07	1.18936e+07	1.18936e+07	1.18936e+07	1.18936e+07	1.18936e+07	1.18936e+07	1.18936e+07	1.18936e+07	1.18936e+07	1.18936e+07	1.24273e+07	1.10195e+07	1.40032e+07	1.4993e+07	1.36923e+07	1.29726e+07	8.2675e+06	1.59894e+07	1.65687e+07	1.39272e+07	1.28802e+07	9.14701e+06	1.09535e+07	1.14329e+07	1.15559e+07
1.876_430.2667		C21 H38 N2 O7	430.267	1.876						level5					59068.7	57551.4	60688.8	58684.1	59840.3	56462.2	59383.4	58491.9	60352.4	58066.6	59025.2	66385.3	67029.7	69401.7	70482.9	68960.6	58672.3	51127.7	63467.5	66513.8	59324.4	72871.9	78451.1	65874.4	65373.9	55819.8
1.882_408.2981		C23 H40 N2 O4	408.298	1.882						level5					97059.9	94566.8	99722.1	96428	98327.8	92777	97577.1	96112.2	99169.4	95413.4	96988.5	109082	110141	114039	115815	113314	96408.6	84011.6	104288	109293	97480.1	119741	128909	108243	107420	91721.5
1.883_260.1186		C11 H20 N2 O3 S	260.119	1.883						level5					2.8946e+06	3.02263e+06	3.22311e+06	2.99475e+06	3.131e+06	2.98749e+06	3.17454e+06	3.05553e+06	3.23293e+06	2.97182e+06	2.9e+06	93721.1	292707	2.85108e+07	1.46898e+06	5.65561e+06	7.32457e+06	653012	1.16719e+06	4.81669e+06	856576	5.31402e+06	108733	7.47969e+06	1.40626e+06	546267
1.886_320.1728		C11 H25 N6 O3 P	320.173	1.886						level5					685855	688670	723666	711982	693720	720117	684458	717488	772121	686917	647547	235779	410713	2.28218e+06	432390	3.00048e+06	1.54277e+06	1.09849e+06	585782	1.0242e+06	472358	778970	117729	514527	360050	333403
1.89_383.1684	Quetiapine	C21 H25 N3 O2 S	383.168	1.89	C07397	S4827	HMDB0005021			level4	Organoheterocyclic compounds	Benzothiazepines	Dibenzothiazepines	NULL	645207	608166	630633	634076	658656	676020	629055	635825	660372	664952	591487	245402	506612	2.3748e+06	345534	3.26558e+06	1.70498e+06	1.11648e+06	482024	939216	448985	886980	111441	437706	419042	423342
1.892_266.087		C7 H14 N4 O7	266.087	1.892						level5					645716	688007	785661	785647	742335	718078	720497	798792	620062	855387	658130	47614.2	1.85403e+06	132105	41286.8	39756.3	1.50517e+06	770273	1.30644e+06	1.09533e+06	1.12456e+06	42891.8	49404.4	166059	462884	339263
1.892_323.1145	Flutolanil	C17 H16 F3 N O2	323.115	1.892	C18502	S43579				level4				NULL	610381	647789	634745	621984	654957	627937	628464	617202	706701	606119	609231	91913.3	198513	4.37834e+06	149778	898351	1.7174e+06	3.34063e+06	647280	1.11734e+06	787427	678047	139880	970865	779315	99177.8
1.893_345.178		C16 H27 N O7	345.178	1.893						level5					1.08327e+06	950992	1.08095e+06	1.05385e+06	1.13244e+06	1.08445e+06	1.03352e+06	1.11062e+06	1.06344e+06	1.05406e+06	1.02227e+06	1.26231e+06	1.35129e+06	2.43836e+06	3.40656e+06	5.18808e+06	766822	874166	466126	446888	476331	281592	1.26054e+06	686172	367486	2.02331e+06
1.9_456.2977		C19 H44 N4 O6 S	456.298	1.9						level5					6.1084e+06	6.35108e+06	6.54664e+06	6.39591e+06	6.41787e+06	6.2564e+06	6.75579e+06	6.60262e+06	6.65223e+06	5.41151e+06	6.75267e+06	7.89842e+06	1.24469e+07	7.76615e+06	1.09153e+07	1.16473e+07	7.07279e+06	1.18561e+07	6.05055e+06	5.20435e+06	6.80097e+06	1.66177e+07	1.38492e+07	5.37756e+06	9.42099e+06	7.74607e+06
[truncated: 967 more rows]
