# Supplementary material for: The Protective Effects of L-Theanine against Epigallocatechin Gallate-Induced Acute Liver Injury in Mice
Source: Foods. 2024 Apr 7;13(7):1121. doi: 10.3390/foods13071121 (PMC11011850; doi:10.3390/foods13071121)
Supplement: Supplementary file 1 [file foods-13-01121-s001.zip › Table S4 E versus C.xlsx]

## Sheet: E-C combined
ID	FC	log2.FC.	raw.pval	X.log10.p.	VIP1	V2	Name	KEGG.ID	HMDB.ID	significance	color
0.632_322.051	0.33039	-1.5977	0.044224	1.3543	1.35054	1.71202	3-[3-(4-hydroxyphenyl)propanoyl]phenyl hydrogen sulfate		HMDB0135462	-1	blue
0.676_681.5315	2.4544	1.2954	0.04637	1.3338	1.33716	0.904968				1	red
0.681_609.5115	0.39625	-1.3355	0.030127	1.521	1.39452	0.116833				-1	blue
0.689_453.3823	2.5785	1.3665	0.00083783	3.0768	1.83334	0.888211				1	red
0.693_408.3241	2.0747	1.0529	0.010615	1.9741	1.57865	0.377497	2-{[(hexadecyloxy)(hydroxy)phosphoryl]oxy}-n,n,n-trimethylethanaminium			1	red
0.698_430.3448	0.18776	-2.413	0.010025	1.9989	1.60087	0.700316	24-homo-1,25-dihydroxyvitamin d3			-1	blue
0.707_160.0891	0.38555	-1.375	0.00038284	3.417	1.88887	0.185911	2-phenyl-4-pentenal		HMDB0035207	-1	blue
0.716_316.24	0.371	-1.4305	0.016681	1.7778	1.51246	1.28034	Pregnane-3,20-dione			-1	blue
0.731_246.1619	0.29749	-1.7491	1.35e-05	4.8692	1.99469	0.105594	Geroquinol	C10793		-1	blue
0.732_401.3315	27.073	4.7588	0.00020782	3.6823	1.90303	0.24207				1	red
0.733_401.3297	25.337	4.6632	0.00025629	3.5913	1.89337	0.0883083				1	red
0.733_423.3136	26.995	4.7546	0.0002024	3.6938	1.90415	0.238878	(5z,8z,11z,14z)-n-(2-phenoxyethyl)-5,8,11,14-icosatetraenamide			1	red
0.737_375.3134	21.813	4.4471	0.00010733	3.9693	1.92823	0.195262	Docosatetraenoylethanolamide	C13829	HMDB0013626	1	red
0.737_399.3134	46.147	5.5282	9.61e-05	4.0172	1.93336	0.266931				1	red
0.738_420.3098	5.1972	2.3777	0.00039568	3.4027	1.86619	0.464836				1	red
0.742_373.2978	4.0379	2.0136	0.004187	2.3781	1.70263	0.357213	(5z,8z,11z,14z)-1-(4-morpholinyl)-5,8,11,14-icosatetraen-1-one			1	red
0.774_283.0698	4.1123	2.0399	0.015583	1.8074	1.54986	0.817472				1	red
0.783_323.2823	0.4874	-1.0368	0.0063721	2.1957	1.62582	0.492975	Linoleoyl ethanolamide		HMDB0012252	-1	blue
0.792_425.3288	0.21533	-2.2154	0.00011656	3.9334	1.91159	0.418401				-1	blue
0.81_341.2929	0.49613	-1.0112	0.0030455	2.5163	1.69503	0.564397	N-acetylsphingosine			-1	blue
0.829_391.2357	0.094743	-3.3998	6.94e-06	5.1588	2.01278	0.389871	2172			-1	blue
0.832_367.2355	0.36152	-1.4679	0.0032713	2.4853	1.72456	0.835531				-1	blue
0.833_214.1207	0.20443	-2.2903	0.00022103	3.6555	1.91029	0.405308	5-hexyl-2-oxotetrahydro-3-furancarboxylic acid		HMDB0030984	-1	blue
0.839_403.2932	0.48802	-1.035	0.0072068	2.1423	1.65871	0.943246				-1	blue
0.844_443.3059	0.44936	-1.1541	0.0091128	2.0403	1.62559	1.32196				-1	blue
0.845_316.2612	50.709	5.6642	0.0035086	2.4549	1.69732	1.01291	9,10-dihydroxystearic acid	C19622		1	red
0.845_317.2646	28.353	4.8254	0.012982	1.8866	1.53184	1.04661	[similar to: 2-amino-1,3,4-octadecanetriol; δmass: -0.0284 da]			1	red
0.846_170.1308	0.48545	-1.0426	0.0069081	2.1606	1.67114	0.151663	2361		HMDB0037116	-1	blue
0.846_298.2507	7.5974	2.9255	0.022399	1.6498	1.44648	0.69399	Ricinelaidic acid			1	red
0.849_137.0479	0.049562	-4.3346	0.0003342	3.476	1.88393	0.00599266	4-aminobenzoate	C00568	HMDB0001392	-1	blue
0.854_365.1626	45.601	5.511	2.06e-05	4.6855	1.98457	0.581105	Nequinate		HMDB0031754	1	red
0.856_120.094	0.44675	-1.1625	0.018923	1.723	1.52689	0.992201	Cumene	C14396	HMDB0034029	-1	blue
0.856_364.1886	0.27566	-1.859	0.00052853	3.2769	1.86486	0.367539	4beta-phorbol	C09155		-1	blue
0.857_345.1786	0.22844	-2.1301	0.00017418	3.759	1.91118	0.472709				-1	blue
0.857_397.1523	201.66	7.6557	1.21e-05	4.9169	2.00317	0.289328	(+)-aureothin	C15689		1	red
0.858_108.0576	0.28813	-1.7952	0.00073045	3.1364	1.83232	0.54749	P-cresol	C01468	HMDB0001858	-1	blue
0.859_399.1469	236.96	7.8885	2.12e-05	4.673	1.98921	0.0929622				1	red
0.86_351.147	82.021	6.3579	6.67e-06	5.176	2.01164	0.387823	Zindoxifene	C14745		1	red
0.861_283.0698	4.0763	2.0272	0.011831	1.927	1.58858	0.347887				1	red
0.864_122.1097	0.26533	-1.9141	0.00017973	3.7454	1.90565	0.803671	3-allylcyclohexene		HMDB0061784	-1	blue
0.864_319.1418	61.396	5.9401	1.77e-05	4.7519	1.99267	0.104955	Proquinolate			1	red
0.865_288.1143	3.1441	1.6526	0.014378	1.8423	1.53795	0.75617	R-soterenol	C11769		1	red
0.865_366.2042	0.40513	-1.3035	0.0018502	2.7328	1.77815	0.521219	Dibutoxyethylphthalate	C15438		-1	blue
0.867_383.119	56.494	5.82	4.76e-05	4.3224	1.96784	0.428377				1	red
0.868_318.1367	55.495	5.7943	1.67e-05	4.7763	1.99635	0.0396687	[similar to: prostaglandin d1; δmass: -36.1040 da]			1	red
0.87_313.2406	0.36291	-1.4623	0.0018334	2.7367	1.78291	0.584013				-1	blue
0.87_413.2619	0.45968	-1.1213	0.016321	1.7873	1.5358	0.0892247				-1	blue
0.87_438.1579	164.9	7.3654	1.49e-05	4.828	1.99825	0.38385				1	red
0.871_411.2443	0.36923	-1.4374	0.0056889	2.245	1.67086	0.0613096				-1	blue
0.872_435.2446	0.46394	-1.108	0.0014161	2.8489	1.80136	0.0430835				-1	blue
0.873_425.3289	0.37843	-1.4019	0.00015446	3.8112	1.88689	0.331498				-1	blue
0.874_363.2442	0.4455	-1.1665	0.020293	1.6927	1.51039	1.05456	N-palmitoyl taurine			-1	blue
0.882_261.1153	45.651	5.5126	6.89e-07	6.1619	2.03623	0.282632				1	red
0.883_242.0726	8.5019	3.0878	0.0089155	2.0499	1.61527	0.00774622	Lidimycin			1	red
0.885_108.094	0.35966	-1.4753	0.008135	2.0896	1.6096	1.33227	4-vinylcyclohexene	C19310		-1	blue
0.892_225.0461	10.344	3.3707	0.002594	2.586	1.75433	0.0736269				1	red
0.894_277.095	11.459	3.5184	5.99e-05	4.2226	1.94927	0.170683				1	red
0.906_439.3297	0.23433	-2.0934	0.0024503	2.6108	1.75686	0.740803				-1	blue
0.912_415.1422	36.208	5.1782	0.00042176	3.3749	1.88577	0.72037				1	red
0.913_179.0949	7.4511	2.8975	0.00027899	3.5544	1.89118	0.643894	Salsolinol	C09642	HMDB0042012	1	red
0.923_261.1002	6.7449	2.7538	0.0047737	2.3211	1.70991	0.949245				1	red
0.927_262.1106	13.388	3.7428	0.001436	2.8429	1.80204	0.188417	Orange ot	C19287		1	red
0.927_305.1262	44.645	5.4804	6.23e-05	4.2056	1.95979	0.227226	Zaleplon	C07484	HMDB0015097	1	red
0.94_353.1262	69.907	6.1274	1.61e-06	5.7932	2.03331	0.242568	Protopine	C05189	HMDB0003920	1	red
0.953_284.0684	9.5758	3.2594	0.0051357	2.2894	1.67142	0.628641	Olmelin	C00814	HMDB0002338	1	red
0.954_266.0579	51.654	5.6908	0.00012347	3.9084	1.93235	0.29729	Phenanthrene-4,5-dicarboxylate	C18252		1	red
0.956_403.142	61.122	5.9336	2.84e-05	4.5471	1.97561	0.617357				1	red
0.958_263.0946	70.044	6.1302	2.33e-05	4.6319	1.98533	0.296575	?-naphthyl anthranilate		HMDB0039873	1	red
0.967_409.2312	0.33926	-1.5596	0.046366	1.3338	1.31923	0.137304				-1	blue
1.006_315.3137	2.2753	1.186	0.034445	1.4629	1.42197	0.108181				1	red
1.014_396.3367	4.4211	2.1444	0.0046087	2.3364	1.68684	1.18576				1	red
1.036_397.1678	127.9	6.9989	1.66e-08	7.779	2.06046	0.280885				1	red
1.075_391.1784	259.18	8.0178	1.88e-05	4.7252	1.99153	0.237407	S-hexyl-glutathione	C02886		1	red
1.077_425.1629	527.87	9.044	5.49e-05	4.2601	1.9677	0.0392786	Domperidone		HMDB0015315	1	red
1.079_378.1664	15.911	3.9919	0.00034907	3.4571	1.88452	0.53581	Cnicin	C09362		1	red
1.097_377.1627	220.99	7.7878	1.05e-05	4.9784	2.00765	0.219467				1	red
1.099_409.1349	61.616	5.9452	0.00025258	3.5976	1.89556	0.615773				1	red
1.13_225.0461	9.8023	3.2931	0.00019617	3.7074	1.91324	0.127087				1	red
1.137_277.1103	245.1	7.9372	3.23e-07	6.4903	2.04784	0.14444	At6200000			1	red
1.143_426.1663	341.05	8.4138	9.69e-05	4.0137	1.93363	0.661147	Mangostanol		HMDB0029868	1	red
1.154_237.1731	0.23995	-2.0592	0.0059535	2.2252	1.68497	1.18892	4808			-1	blue
1.164_179.0949	4.8464	2.2769	0.0033839	2.4706	1.71168	1.04804	Phenacetin	C07591		1	red
1.168_245.1053	2.4294	1.2806	0.035416	1.4508	1.39142	0.22014	N-phenylacetyl pyroglutamic acid		HMDB0059782	1	red
1.169_385.0984	39.463	5.3024	4.59e-05	4.3384	1.95874	0.41875				1	red
1.189_333.1365	41.694	5.3818	4.43e-05	4.3532	1.96221	0.266882	2-naphthyl n-acetylphenylalaninate	C11341		1	red
1.191_203.1173	8.2168	3.0386	0.00044213	3.3544	1.86852	0.00127363	Enadenine	C04083		1	red
1.211_219.09	2.3635	1.2409	0.042992	1.3666	1.36067	0.840483	Aniracetam	C13355		1	red
1.233_365.1264	15.823	3.984	0.032773	1.4845	1.42536	0.653969				1	red
1.233_464.174	142.42	7.154	6.8e-06	5.1677	2.01671	0.208988				1	red
1.237_335.1157	99.26	6.6331	8.41e-06	5.0753	2.00266	0.238615	Berberine	C00757	HMDB0003409	1	red
1.262_222.1007	49.132	5.6186	0.00019441	3.7113	1.91791	0.432128	Gly-phe		HMDB0028848	1	red
1.287_341.1474	0.36432	-1.4567	0.004822	2.3168	1.69406	0.0473271	His-trp			-1	blue
1.556_124.0356	9.3398	3.2234	0.00098687	3.0057	1.80888	0.978583				1	red
1.563_192.0361	4.0097	2.0035	0.011101	1.9546	1.59073	0.792031				1	red
13.421_273.1802	15.73	3.9754	0.021069	1.6764	1.45214	0.916454	Val-arg			1	red
13.44_102.1158	1635.6	10.676	0.00018234	3.7391	1.90056	0.873011	Cadaverine	C01672	HMDB0002322	1	red
3.246_397.1679	610.27	9.2533	7.77e-07	6.1094	2.03525	0.127348				1	red
3.267_398.1712	411.39	8.6844	4.93e-09	8.3072	2.06316	0.0671762	N-benzoyl-d-arginine-4-nitroanilide	C04303		1	red
3.438_383.1522	148.55	7.2148	1.76e-07	6.7544	2.05502	0.295406	Meropenem		HMDB0014898	1	red
3.929_464.1741	213.07	7.7352	1.46e-05	4.8368	1.99424	0.144907				1	red
4.064_363.147	306.49	8.2597	1.35e-06	5.8713	2.02917	0.231792	1,2-dimethoxy-12,13-dimethyl-12,13-dihydro[1,3]benzodioxolo[5,6-c]phenanthridine		HMDB0041143	1	red
4.25_463.3068	3.1964	1.6765	0.028884	1.5393	1.40217	0.158194				1	red
5.112_111.0434	5.7518	2.524	0.030424	1.5168	1.39249	0.441306	Cytosine	C00380	HMDB0000630	1	red
5.22_407.1367	56.52	5.8207	2.09e-06	5.6794	2.02518	0.0111984	(1,2-dimethoxy-12-methyl-12,13-dihydro[1,3]benzodioxolo[5,6-c]phenanthridin-13-yl)acetic acid		HMDB0029832	1	red
5.278_151.0636	4.2649	2.0925	0.037315	1.4281	1.40299	0.622554	2-phenylglycine		HMDB0002210	1	red
6.699_260.0412	0.41701	-1.2619	0.039921	1.3988	1.36482	0.631799				-1	blue
7.118_336.1321	0.43951	-1.186	0.011448	1.9413	1.59481	0.334131				-1	blue
7.132_574.3985	68.712	6.1025	4.87e-06	5.3126	2.02493	0.101599				1	red
7.144_189.1004	12.643	3.6603	0.0043088	2.3656	1.68416	0.670902	(+)-castanospermine	C02256		1	red
7.15_381.1722	0.12045	-3.0535	0.00088412	3.0535	1.83857	1.19036	Xaliproden			-1	blue
7.188_164.0477	0.21214	-2.2369	0.008871	2.052	1.63125	0.912485	2-hydroxycinnamic acid	C01772	HMDB0002641	-1	blue
7.189_118.0422	0.16275	-2.6193	0.0052052	2.2836	1.69518	0.786775	Coumarone	C14512	HMDB0032929	-1	blue
7.19_122.037	0.23194	-2.1082	0.010563	1.9762	1.60956	0.422969	Benzoic acid	C00180	HMDB0001870	-1	blue
7.197_263.1369	0.3907	-1.3558	0.040478	1.3928	1.3623	0.345561				-1	blue
7.201_135.0687	0.17407	-2.5223	0.010832	1.9653	1.60811	0.885313	N-benzylformamide	C15561		-1	blue
7.205_117.0677	0.13507	-2.8882	0.010365	1.9844	1.61699	0.28769	[similar to: l-valine; δmass: -0.0112 da]			-1	blue
7.255_281.1263	19.484	4.2842	0.00040474	3.3928	1.85603	0.662348	Trimetozine			1	red
7.268_403.1542	0.046595	-4.4237	0.0009681	3.0141	1.81806	0.545037	Amibegron			-1	blue
7.272_299.1369	21.95	4.4561	0.0014548	2.8372	1.78673	0.812114				1	red
7.7_225.9444	2.9912	1.5807	0.049028	1.3096	1.33987	1.14941	(2e)-2,5-dichloro-4-oxo-2-hexenedioic acid	C12835	HMDB0060363	1	red
8.998_407.1927	271.5	8.0848	0.00074767	3.1263	1.84047	0.17296				1	red
0.644_336.0661	0.16577	-2.5927	0.013522	1.8689	1.46724	0.868667	4-[(e)-2-(3,5-dimethoxyphenyl)vinyl]phenyl hydrogen sulfate		HMDB0130996	-1	blue
0.653_394.0715	0.13938	-2.8429	0.0051879	2.285	1.57896	0.569677				-1	blue
0.655_427.2205	0.32021	-1.6429	0.003132	2.5042	1.59638	0.928884				-1	blue
0.658_405.2364	0.38668	-1.3708	0.024131	1.6174	1.3196	1.1396				-1	blue
0.659_403.2207	0.43278	-1.2083	0.011355	1.9448	1.45459	1.01405				-1	blue
0.662_379.2207	0.367	-1.4461	0.0011224	2.9499	1.68552	0.812345				-1	blue
0.684_710.513	2.1998	1.1374	0.019221	1.7162	1.40546	0.745188				1	red
0.699_386.3179	2.5672	1.3602	0.036221	1.441	1.33167	0.849364	Fafar hs-50		HMDB0032925	1	red
0.703_384.3022	2.6549	1.4087	0.045401	1.3429	1.29509	0.746611				1	red
0.703_679.6128	0.46073	-1.118	0.005968	2.2242	1.50706	0.505672				-1	blue
0.707_402.2551	2.2429	1.1654	0.043141	1.3651	1.31647	0.748531				1	red
0.719_401.3288	5.9457	2.5718	0.0099175	2.0036	1.54277	0.527403				1	red
0.72_279.0071	5.8464	2.5475	0.033739	1.4719	1.27599	0.971747				1	red
0.721_189.0092	12.955	3.6954	0.030564	1.5148	1.29979	1.12695	Lanthionine ketimine		HMDB0004823	1	red
0.721_423.3127	5.9617	2.5757	0.0069673	2.1569	1.58377	0.528596	(5z,8z,11z,14z)-n-(2-phenoxyethyl)-5,8,11,14-icosatetraenamide			1	red
0.723_260.1768	4.9163	2.2976	0.0095812	2.0186	1.53512	0.706781	1,9-heptadecadien-4,6-diyn-3,8-diol			1	red
0.723_375.313	6.4687	2.6935	0.0065739	2.1822	1.57992	0.603752	Docosatetraenoylethanolamide	C13829	HMDB0013626	1	red
0.723_399.3129	5.6962	2.51	0.014931	1.8259	1.46876	0.509362				1	red
0.725_480.3802	0.48949	-1.0307	0.019334	1.7137	1.35117	0.773496				-1	blue
0.734_452.3132	3.7175	1.8944	0.0027649	2.5583	1.60768	0.523647				1	red
0.735_450.2982	2.4922	1.3174	0.0040285	2.3949	1.60832	0.421615				1	red
0.737_448.2813	2.0237	1.017	0.018037	1.7438	1.40628	0.757381	16-feruloyloxypalmitic acid	C18217		1	red
0.738_378.2036	0.47821	-1.0643	0.024274	1.6149	1.25254	0.48557	Mfcd00273304	C15291		-1	blue
0.739_414.2526	2.87	1.521	0.010183	1.9921	1.50732	0.658964				1	red
0.742_282.1247	5.06	2.3391	0.03677	1.4345	1.26041	0.979443	Erteberel			1	red
0.742_347.2817	0.36004	-1.4738	0.00010819	3.9658	1.77975	0.460107	Anandamide	C11695	HMDB0004080	-1	blue
0.743_390.2529	2.7074	1.4369	0.029763	1.5263	1.35962	0.820126				1	red
0.744_410.2771	0.20599	-2.2794	0.0003402	3.4683	1.71935	0.620323				-1	blue
0.748_149.0331	2.8225	1.497	0.026978	1.569	1.37444	0.857634	Ditiocarb	C19150		1	red
0.748_323.2818	0.49142	-1.025	0.0031899	2.4962	1.59525	0.831942	Mfcd00674434		HMDB0012252	-1	blue
0.748_393.2872	0.3672	-1.4454	0.00013042	3.8846	1.7725	0.455254				-1	blue
0.753_230.1148	0.25365	-1.9791	0.00024475	3.6113	1.77891	0.504334				-1	blue
0.754_274.1409	0.39731	-1.3317	0.0060981	2.2148	1.52924	0.834704	5-oxidanidyl-5-oxidanylidenenorvalyllysine			-1	blue
0.755_345.2873	0.48537	-1.0428	0.0040808	2.3893	1.54024	0.879785				-1	blue
0.755_369.1205	15.384	3.9434	0.0048543	2.3139	1.58982	0.629466	6-hydroxyprotopine	C05190		1	red
0.756_188.0833	9.9521	3.315	0.0061559	2.2107	1.5747	0.709504	(z)-3-butylidenephthalide	C16924	HMDB0032061	1	red
0.757_199.0841	0.15724	-2.669	0.001109	2.9551	1.68714	0.631587	2-acetyl-6-hydroxy-7-(hydroxymethyl)-1,5,6,7-tetrahydro-4h-azepin-4-one		HMDB0035177	-1	blue
0.758_164.0834	6.5355	2.7083	0.010963	1.9601	1.48471	0.829895	Eugenol	C10453	HMDB0005809	1	red
0.764_306.1248	17.126	4.0981	0.002705	2.5678	1.63495	0.693846	(1ar,2r,3s,11cs)-6,11-dimethyl-1a,2,3,11c-tetrahydrotetrapheno[1,2-b]oxirene-2,3-diol	C19559	HMDB0062223	1	red
0.765_212.1045	0.215	-2.2176	0.0050455	2.2971	1.55447	0.876791	Guaietolin			-1	blue
0.766_477.1985	0.35013	-1.514	0.011882	1.9251	1.44462	0.886827				-1	blue
0.769_162.0678	8.6558	3.1137	0.014353	1.843	1.47968	0.725875	Safrole	C10490	HMDB0033591	1	red
0.77_218.0242	5.8543	2.5495	0.039237	1.4063	1.23083	1.059	4-(2-hydroxyethyl)phenyl hydrogen sulfate		HMDB0041785	1	red
0.775_379.1412	4.8547	2.2794	0.020531	1.6876	1.42916	0.607379	Angoline	C09336		1	red
0.778_242.0938	0.22228	-2.1695	0.0028959	2.5382	1.65265	0.368448	(±)-equol		HMDB0130495	-1	blue
0.778_345.2297	2.1718	1.1189	0.04137	1.3833	1.31478	0.758013				1	red
0.779_396.2141	0.3635	-1.46	0.00012011	3.9204	1.78022	0.413626	6737			-1	blue
0.783_462.2086	0.10375	-3.2688	0.0024352	2.6135	1.60935	0.662316	Patrinoside	C11640		-1	blue
0.783_479.199	0.15111	-2.7263	0.011417	1.9425	1.43551	0.986281				-1	blue
0.786_159.0682	0.32402	-1.6258	0.0034306	2.4646	1.56558	0.894118	Indole-3-acetaldehyde	C00637	HMDB0001190	-1	blue
0.789_254.0936	7.882	2.9786	0.003769	2.4238	1.61935	0.636616	Ketoprofen	C01716	HMDB0015144	1	red
0.792_518.3229	0.39523	-1.3392	0.040861	1.3887	1.24589	0.707496	Cucurbitacin f	C08798		-1	blue
0.794_284.104	3.009	1.5893	0.019768	1.704	1.39502	0.5365	Caffeic acid phenethyl ester	C10484		1	red
0.796_331.214	5.5596	2.475	0.018816	1.7255	1.46585	0.24521	Megastachine	C09888		1	red
0.804_325.1307	10.768	3.4286	0.0009948	3.0023	1.7095	0.585511	(s)-(+)-bulbocapnine	C09367		1	red
0.807_317.1984	8.2615	3.0464	0.017505	1.7568	1.47699	0.483843	(+/-)-tetrabenazine	C11168	HMDB0015592	1	red
0.809_180.0784	3.7075	1.8905	0.024955	1.6028	1.35091	1.11118	Propylparaben	D01422	HMDB0032574	1	red
0.838_289.1669	9.5164	3.2504	0.0054611	2.2627	1.60821	0.397736	Atropine	C01479	HMDB0014712	1	red
0.844_240.0779	10.256	3.3585	0.0026329	2.5796	1.6437	0.597927	3-hydroxyflavanone	C15570		1	red
0.847_401.2229	0.35454	-1.496	0.0030013	2.5227	1.64167	0.390533				-1	blue
0.851_168.0784	0.19981	-2.3233	0.015233	1.8172	1.40626	0.95159	Dc2810000		HMDB0059963	-1	blue
0.852_277.1094	16.202	4.0181	0.0019045	2.7202	1.66455	0.670068	At6200000			1	red
0.87_205.0734	3.9011	1.9639	0.011877	1.9253	1.50023	0.767799	5-methoxyindoleacetic acid	C05660	HMDB0004096	1	red
0.873_263.0938	5.1762	2.3719	0.008447	2.0733	1.53403	0.63126	?-naphthyl anthranilate		HMDB0039873	1	red
0.874_179.0943	2.5764	1.3654	0.027783	1.5562	1.38218	0.815493	Phenacetin	C07591		1	red
0.878_225.0454	2.1402	1.0977	0.034587	1.4611	1.35116	0.828534				1	red
0.879_161.0838	2.3241	1.2167	0.033607	1.4736	1.35745	0.82256	3-(2-hydroxyethyl)indole	C00955	HMDB0003447	1	red
0.883_136.0522	3.4031	1.7668	0.027385	1.5625	1.36891	0.430766	Phenylacetic acid	C07086	HMDB0000209	1	red
0.888_206.0574	2.4246	1.2778	0.028347	1.5475	1.3794	0.792321	Scoparone	C09311	HMDB0030818	1	red
0.889_270.0884	5.2542	2.3935	0.015084	1.8215	1.46773	0.664699	Imperatorin	C09269	HMDB0034376	1	red
0.917_358.2863	2.1102	1.0774	0.026117	1.5831	1.39369	0.865366	1-phenyl-1,3-octadecanedione		HMDB0035583	1	red
0.922_686.5272	2.6849	1.4249	0.0076837	2.1144	1.4935	0.493524				1	red
0.925_684.5132	2.0816	1.0577	0.014538	1.8375	1.44167	0.796039				1	red
0.928_360.302	2.8906	1.5314	0.0064645	2.1895	1.52507	0.864086	5beta-cholanoic acid	C19642		1	red
0.941_685.5162	2.3424	1.228	0.0035064	2.4551	1.6068	0.725223				1	red
0.942_331.2791	2.1378	1.0961	0.0032236	2.4917	1.58081	0.53069				1	red
0.962_409.2637	2.0115	1.0083	0.0043728	2.3592	1.56957	0.874419				1	red
0.973_316.2388	2.3512	1.2334	0.0028684	2.5424	1.62724	0.842722	Pregnane-3,20-dione			1	red
1.002_122.0366	3.4835	1.8005	0.024393	1.6127	1.39537	0.864571	4-hydroxybenzaldehyde	C00633	HMDB0011718	1	red
1.018_558.4641	2.2474	1.1682	0.013283	1.8767	1.46569	0.954307				1	red
1.019_582.4634	2.114	1.08	0.0090253	2.0445	1.50926	0.600389				1	red
1.036_297.2377	2.0731	1.0518	0.006029	2.2198	1.55984	0.903458				1	red
1.037_276.208	2.8887	1.5304	0.0065205	2.1857	1.53185	0.956503	(e)-parinaric acid			1	red
1.04_562.4954	2.962	1.5666	0.035318	1.452	1.27342	0.898696				1	red
1.042_166.0627	13.718	3.778	0.0013266	2.8773	1.66285	0.505006	3-(4-hydroxyphenyl)propionic acid	C01744	HMDB0002199	1	red
1.046_252.2082	2.875	1.5236	0.016543	1.7814	1.42676	1.02752	Ambrettolide		HMDB0031086	1	red
1.047_268.2031	4.0461	2.0165	0.019269	1.7151	1.37588	1.0955				1	red
1.059_348.2654	4.0104	2.0038	0.0035846	2.4456	1.56903	0.669127	Anacardic acid	C10759	HMDB0029683	1	red
1.083_365.1617	2.5209	1.3339	0.034562	1.4614	1.32022	0.775116	Nequinate		HMDB0031754	1	red
1.103_265.0731	3.2507	1.7007	0.02018	1.6951	1.4183	0.726551	Oxycinchophen			1	red
1.105_500.3124	0.15081	-2.7291	0.00055587	3.255	1.7182	0.533905	11-deoxocucurbitacin i	C08807		-1	blue
1.118_304.1515	0.24342	-2.0385	0.00052738	3.2779	1.73576	0.534039				-1	blue
1.122_298.0945	2.1023	1.0719	0.0265	1.5768	1.36537	0.788451	Amlexanox		HMDB0015160	1	red
1.123_431.1358	6.9754	2.8023	0.0086029	2.0654	1.51772	0.580741	Tiodazosin			1	red
1.132_243.0561	7.7679	2.9575	0.0018861	2.7244	1.67397	0.708284				1	red
1.14_399.1461	7.5674	2.9198	0.0084637	2.0724	1.52608	0.595135	S-(5'-adenosyl)-l-methionine conjugate acid		HMDB0001185	1	red
1.166_334.1157	5.265	2.3964	0.0055025	2.2594	1.56527	0.669652				1	red
1.168_271.12	4.3009	2.1046	0.011937	1.9231	1.50102	0.678409	7,8-didehydro-4,5-epoxymorphinan-3,6-diol			1	red
1.191_226.0835	6.1425	2.6188	0.018003	1.7447	1.44819	0.693898	Genipin	C09780	HMDB0035830	1	red
1.193_136.0522	5.2488	2.392	0.021813	1.6613	1.42506	0.735635	4-toluic acid	C01454	HMDB0029635	1	red
1.198_272.0887	5.8576	2.5503	0.019073	1.7196	1.44181	0.707026	Arbutin	C06186	HMDB0029943	1	red
1.217_863.606	4.8817	2.2874	0.012304	1.91	1.46103	0.839537				1	red
1.231_839.6058	6.9741	2.802	0.022191	1.6538	1.36464	1.05009				1	red
1.236_837.5911	12.164	3.6045	0.02912	1.5358	1.31245	1.06975				1	red
1.252_152.0471	48.98	5.6141	0.01098	1.9594	1.48804	0.959699	2-anisic acid		HMDB0032604	1	red
1.289_815.6043	8.3143	3.0556	0.046675	1.3309	1.23471	1.04598				1	red
1.296_351.1464	3.7928	1.9233	0.01881	1.7256	1.43796	0.669071	Zindoxifene	C14745		1	red
1.324_787.574	12.532	3.6475	0.04829	1.3161	1.21783	1.02726				1	red
1.343_400.2562	5.0787	2.3445	0.0043616	2.3604	1.53886	0.739789				1	red
1.367_475.3247	3.5236	1.8171	0.0080924	2.0919	1.55279	0.174442				1	red
1.374_383.1184	17.776	4.1519	0.0060033	2.2216	1.54473	0.31633				1	red
1.383_286.2501	4.3652	2.126	0.01384	1.8589	1.48276	0.525273	Methyl 3-hydroxypalmitate	C11849		1	red
1.405_832.603	2.6514	1.4068	0.029814	1.5256	1.30193	1.09267				1	red
1.43_456.3229	0.11154	-3.1644	0.0019311	2.7142	1.61943	0.338211	Callystatin a	C16891		-1	blue
1.433_232.073	5.828	2.543	0.0060958	2.215	1.54309	0.740308	2-methyl-5-acetonyl-7-hydroxychromone		HMDB0030813	1	red
1.444_484.3176	0.11839	-3.0784	0.0014679	2.8333	1.63954	0.484668	Propapyriogenin a2	C08971		-1	blue
1.467_320.1114	4.9802	2.3162	0.011796	1.9282	1.50162	0.706208				1	red
1.47_383.1069	7.402	2.8879	0.0078388	2.1057	1.55422	0.730478	Succinyladenosine		HMDB0000912	1	red
1.526_565.3251	0.21856	-2.1939	0.019152	1.7178	1.39797	0.702274				-1	blue
1.585_196.0845	5.6847	2.5071	0.010862	1.9641	1.52457	0.561322	5-nitro-2-propoxyaniline		HMDB0037688	1	red
1.597_160.037	7.4367	2.8947	0.0029204	2.5346	1.64116	0.502573	Alpha-ketoadipic acid	C00322	HMDB0000225	1	red
1.641_214.1201	0.29175	-1.7772	0.0023651	2.6262	1.62279	0.759886	5-hexyl-2-oxotetrahydro-3-furancarboxylic acid		HMDB0030984	-1	blue
1.643_334.0503	2.6075	1.3826	0.015327	1.8145	1.43618	0.74316	4-allyl-2-(sulfooxy)phenyl benzoate		HMDB0135248	1	red
1.648_456.2097	0.25416	-1.9762	0.0092281	2.0349	1.47853	0.972848				-1	blue
1.728_222.1	8.954	3.1625	0.010914	1.962	1.51282	0.719697	Gly-phe		HMDB0028848	1	red
1.772_669.4089	0.49055	-1.0275	0.00099119	3.0038	1.71525	0.631081				-1	blue
1.774_606.4123	0.47274	-1.0809	0.0009784	3.0095	1.71235	0.592659				-1	blue
1.787_251.04	11.244	3.4911	0.012432	1.9055	1.47659	0.660973				1	red
1.793_120.0573	7.0282	2.8132	0.015041	1.8227	1.45162	0.702348	Acetophenone	C07113	HMDB0033910	1	red
1.793_148.0523	8.0482	3.0087	0.014421	1.841	1.46293	0.698261	Trans-cinnamate	C00423	HMDB0000930	1	red
1.793_166.0627	7.0607	2.8198	0.015136	1.82	1.45088	0.702893	3-phenyllactic acid	C05607	HMDB0000748	1	red
1.798_234.0499	9.1154	3.1883	0.015195	1.8183	1.44768	0.683475	Mfcd00010043	C20124		1	red
1.806_303.081	0.47056	-1.0875	0.0014211	2.8474	1.66677	0.507196				-1	blue
1.808_350.2089	0.39692	-1.3331	0.013365	1.874	1.47916	0.692211	(-)-andrographolide	C20214		-1	blue
1.812_486.3335	0.13757	-2.8618	0.0045124	2.3456	1.59787	0.746782	Quillaic acid	C08972		-1	blue
1.892_266.087	2.7518	1.4604	0.014504	1.8385	1.45826	0.910482				1	red
1.893_345.178	0.23147	-2.1111	0.0033688	2.4725	1.60565	0.764411				-1	blue
10.424_203.0038	2.9053	1.5387	0.0085022	2.0705	1.46948	0.35114				1	red
10.43_118.0265	2.8008	1.4858	0.0081623	2.0882	1.47215	0.425748	Succinic acid	C00042	HMDB0000254	1	red
2.003_200.0657	3.6414	1.8645	0.01014	1.994	1.51111	0.864676				1	red
2.004_217.0557	3.8234	1.9349	0.0098004	2.0088	1.51458	0.883137				1	red
2.023_584.2741	0.19266	-2.3759	0.0086625	2.0624	1.51483	0.503497				-1	blue
2.026_154.0628	0.31634	-1.6605	1.27e-05	4.8948	1.8962	0.172204	Vanillyl alcohol	C06317	HMDB0032012	-1	blue
2.083_379.2562	11.682	3.5462	0.048898	1.3107	1.27336	0.99987				1	red
2.085_284.1365	0.28154	-1.8286	0.0047427	2.324	1.56636	0.798231				-1	blue
2.092_137.0475	0.14795	-2.7568	0.00021576	3.666	1.78749	0.136818	Anthranilate	C00108	HMDB0001123	-1	blue
2.093_205.0347	0.10536	-3.2466	0.00079914	3.0974	1.72909	0.195538				-1	blue
2.093_384.2481	19.251	4.2669	0.041236	1.3847	1.29303	0.81516				1	red
2.132_566.3195	0.35372	-1.4993	0.015546	1.8084	1.42646	0.702718				-1	blue
2.142_400.1837	0.32273	-1.6316	0.0031902	2.4962	1.59294	0.705905				-1	blue
2.177_248.1154	2.4151	1.2721	0.045393	1.343	1.28117	0.730578	6-hydroxymelatonin	C05643	HMDB0004081	1	red
2.192_124.0524	3.5687	1.8354	0.023583	1.6274	1.34351	0.468541	4-methylcatechol	C06730	HMDB0000873	1	red
2.201_123.0446	3.3732	1.7541	0.046047	1.3368	1.21088	0.191329				1	red
2.235_396.2982	3.3215	1.7319	0.031674	1.4993	1.29782	0.190829				1	red
2.266_270.052	2.6882	1.4266	0.046429	1.3332	1.28887	0.685836	Genistein	C06563	HMDB0003217	1	red
2.296_394.2825	3.7422	1.9039	0.014268	1.8456	1.41634	0.447983				1	red
2.299_457.2779	3.2097	1.6824	0.023269	1.6332	1.33864	0.436784				1	red
2.323_463.3051	3.8958	1.9619	0.012447	1.9049	1.4829	0.79596				1	red
2.357_195.0562	4.7184	2.2383	0.015568	1.8078	1.42317	0.984812				1	red
2.361_370.2825	3.5264	1.8182	0.02287	1.6407	1.34369	0.566526				1	red
2.362_433.278	2.905	1.5385	0.042145	1.3753	1.22764	0.523689				1	red
2.377_150.0348	7.0431	2.8162	0.0027618	2.5588	1.61355	0.734818	2-hydroxy-4-(methylthio)butyric acid			1	red
2.39_391.072	4.1297	2.046	0.019667	1.7063	1.40187	0.490566				1	red
2.414_522.2663	2.9239	1.5479	0.030244	1.5194	1.34591	0.539881				1	red
2.44_380.1691	2.2111	1.1448	0.019967	1.6997	1.39983	0.756796				1	red
2.515_347.1879	13.47	3.7517	0.0029611	2.5285	1.61739	0.558338	3,8-dimethyl-3-(4-methyl-3-penten-1-yl)-3,11-dihydropyrano[3,2-a]carbazol-9-ol		HMDB0038828	1	red
2.559_314.2086	0.41358	-1.2738	0.005543	2.2563	1.52191	0.55062				-1	blue
2.56_377.2042	0.47719	-1.0674	0.01359	1.8668	1.41952	0.753995				-1	blue
2.592_586.2624	2.2684	1.1817	0.021338	1.6708	1.36879	0.827978				1	red
2.629_293.1046	16.113	4.0102	0.0019995	2.6991	1.6446	0.529251	Oxaprozin	C07356	HMDB0015126	1	red
2.634_381.1721	13.888	3.7957	0.0038459	2.415	1.60709	0.620665	Xaliproden			1	red
2.636_425.1619	14.586	3.8665	0.0024816	2.6053	1.62795	0.581823	Domperidone		HMDB0015315	1	red
2.638_113.0588	6.9391	2.7948	0.013269	1.8771	1.44345	0.574347	Creatinine	C00791	HMDB0000562	1	red
2.743_333.1723	12.401	3.6324	0.0026992	2.5688	1.62035	0.550882	Enpromate			1	red
2.784_449.2252	0.45026	-1.1512	0.027513	1.5605	1.39754	0.864393				-1	blue
2.786_386.2298	0.48884	-1.0326	0.041544	1.3815	1.32722	0.651899	Oleandolide	C11990		-1	blue
2.925_246.0845	0.45216	-1.1451	0.00055461	3.256	1.70676	0.547459	Dihydrouridine		HMDB0000497	-1	blue
2.925_397.1669	21.238	4.4085	0.0004258	3.3708	1.75395	0.488604				1	red
2.927_309.0801	0.48953	-1.0305	0.0014345	2.8433	1.64627	0.461556				-1	blue
2_132.0785	2.9713	1.5711	0.013167	1.8805	1.47387	0.870489	6-hydroxycaproic acid	C06103	HMDB0012843	1	red
3.029_205.0734	5.0006	2.3221	0.030168	1.5204	1.27752	1.04709	Cinnamoylglycine		HMDB0011621	1	red
3.03_435.2096	0.39707	-1.3325	0.03916	1.4072	1.32819	0.701003	Trimazosin			-1	blue
3.081_239.0611	7.002	2.8078	0.014148	1.8493	1.4894	0.568089	N-acetyl(phenyl)cysteine		HMDB0042011	1	red
3.099_452.2764	0.39421	-1.343	0.0012114	2.9167	1.66136	0.395362				-1	blue
3.099_469.2665	0.37426	-1.4179	0.0010885	2.9632	1.67338	0.444587				-1	blue
3.103_302.1009	23.709	4.5674	0.0010609	2.9743	1.68652	0.588657	Terizidone			1	red
3.109_220.0731	2.1654	1.1146	0.043554	1.361	1.29958	0.782381	Eugenitin		HMDB0029467	1	red
3.109_319.1275	18.985	4.2468	0.0015633	2.806	1.67543	0.596499				1	red
3.126_193.0736	10.689	3.4181	0.047848	1.3201	1.21417	1.1024	Phenylacetylglycine	C05598	HMDB0000821	1	red
3.278_385.0976	10.194	3.3497	0.0036693	2.4354	1.61279	0.603036				1	red
3.28_276.1102	0.48226	-1.0521	0.00021386	3.6699	1.75762	0.529803	Oxagrelate			-1	blue
3.366_438.2972	0.49766	-1.0068	0.0020531	2.6876	1.63051	0.504669				-1	blue
3.381_132.0572	2.3428	1.2282	0.045086	1.346	1.3156	0.765096	Cinnamaldehyde	C00903	HMDB0003441	1	red
3.384_134.0729	2.2743	1.1854	0.048141	1.3175	1.30302	0.741398	Cinnamyl alcohol	C02394	HMDB0029698	1	red
3.384_152.0835	2.2731	1.1847	0.048018	1.3186	1.30429	0.722243	2128		HMDB0041326	1	red
3.384_178.0627	2.3434	1.2286	0.046622	1.3314	1.30884	0.790699	(e)-4-methoxycinnamic acid		HMDB0002040	1	red
3.482_189.0999	0.46191	-1.1143	0.00022962	3.639	1.75218	0.404267	(+)-castanospermine	C02256		-1	blue
3.637_157.0737	2.2483	1.1688	0.021162	1.6744	1.3448	1.09629	3-methylcrotonylglycine	C20828	HMDB0000459	1	red
3.643_280.0454	0.4627	-1.1119	0.030405	1.5171	1.30471	0.851598				-1	blue
3.644_232.0842	7.198	2.8476	0.024036	1.6191	1.33386	1.00711	Phenobarbital	C07434	HMDB0015305	1	red
3.659_573.2497	0.38226	-1.3874	0.024442	1.6119	1.32072	0.899354				-1	blue
3.672_311.1224	0.34862	-1.5203	0.019305	1.7143	1.38402	0.853821	N2-dimethylguanosine		HMDB0004824	-1	blue
3.956_123.032	3.6917	1.8843	0.0039437	2.4041	1.61224	0.834303	Picolinic acid	C10164	HMDB0002243	1	red
3.958_208.0092	3.6223	1.8569	0.0050039	2.3007	1.59827	0.833145				1	red
4.307_145.0737	0.44417	-1.1708	0.039681	1.4014	1.34809	0.462895	N-isobutyrylglycine		HMDB0000730	-1	blue
4.53_108.0574	2.5155	1.3309	0.035942	1.4444	1.34499	0.793555	4-methylphenol	C01468	HMDB0001858	1	red
4.588_433.2566	0.28692	-1.8013	0.025042	1.6013	1.3566	1.07718	Methyl n-formylnorleucylleucylphenylalaninate	C11298		-1	blue
4.592_352.1391	0.46326	-1.1101	0.042906	1.3675	1.26252	1.08422				-1	blue
4.76_136.0383	68.763	6.1036	0.034142	1.4667	1.27659	0.810458	Hypoxanthine	C00262	HMDB0000157	1	red
4.866_471.282	0.41764	-1.2597	0.0075279	2.1233	1.52523	0.798937				-1	blue
5.002_454.2919	0.3562	-1.4893	0.0044198	2.3546	1.54165	0.546042				-1	blue
6.112_180.0631	0.30044	-1.7349	0.01829	1.7378	1.38848	0.638954	D-fructose	C02336	HMDB0000660	-1	blue
6.161_243.0585	0.35255	-1.5041	0.014855	1.8281	1.42348	0.531627				-1	blue
6.547_207.035	2.3935	1.2591	0.047192	1.3261	1.29	0.742244				1	red
6.582_220.0552	30.039	4.9088	0.00026555	3.5759	1.77226	0.500097	5-(2-thienyl)-3,4,7,7a-tetrahydrocyclopenta[b]pyran-6(2h)-one		HMDB0035149	1	red
7.005_237.0104	15.479	3.9522	0.017221	1.7639	1.41384	1.08852				1	red
7.007_152.0331	16.822	4.0723	0.016431	1.7843	1.42137	1.09401	Xanthine	C00385	HMDB0000292	1	red
7.637_255.9881	10.828	3.4367	0.021154	1.6746	1.3737	1.04616	L-ascorbic acid 2-sulfate			1	red
7.642_200.0654	33.031	5.0457	0.00041983	3.3769	1.75281	0.54723				1	red
7.643_157.0598	30.519	4.9316	0.0003772	3.4234	1.7538	0.526033				1	red
8.052_197.0321	0.17841	-2.4867	0.00088614	3.0525	1.69462	0.742785	4-hydroxy-3-nitrophenylacetic acid		HMDB0062403	-1	blue
8.769_217.0306	8.001	3.0002	0.04337	1.3628	1.24802	0.971342	[similar to: asparagine; δmass: 84.9771 da]			1	red
8.772_132.0533	7.1379	2.8355	0.041717	1.3797	1.25601	0.871719	L-asparagine	C00152	HMDB0000168	1	red
9.563_146.0214	2.0092	1.0066	0.028965	1.5381	1.35867	0.319757	2-oxoglutaric acid	C00026	HMDB0000208	1	red
9.586_102.0316	2.1884	1.1299	0.016757	1.7758	1.42355	0.393843	2-oxobutyric acid	C00109	HMDB0000005	1	red
