# Supplementary material for: The Protective Effects of L-Theanine against Epigallocatechin Gallate-Induced Acute Liver Injury in Mice
Source: Foods. 2024 Apr 7;13(7):1121. doi: 10.3390/foods13071121 (PMC11011850; doi:10.3390/foods13071121)
Supplement: Supplementary file 1 [file foods-13-01121-s001.zip › Table S5 LE versus E.xlsx]

## Sheet: LE-E combined
ID	FC	log2.FC.	raw.pval	X.log10.p.	VIP1	V2	Name	KEGG.ID	HMDB.ID	significance	color
0.681_609.5115	3.2725	1.7104	0.040203	1.3957	1.1911	1.58657				1	red
0.688_488.3874	3.6195	1.8558	0.045221	1.3447	1.22972	1.57366	(1s,2r,3r,5z,7e)-2-(4-hydroxybutyl)-9,10-secocholesta-5,7,10-triene-1,3,25-triol			1	red
0.688_599.4918	2.4395	1.2866	0.002647	2.5773	1.60924	0.317368				1	red
0.689_453.3823	3.5342	1.8214	0.013115	1.8822	1.3784	1.40045				1	red
0.693_408.3241	3.4879	1.8023	0.0073546	2.1334	1.49316	1.17065	2-{[(hexadecyloxy)(hydroxy)phosphoryl]oxy}-n,n,n-trimethylethanaminium			1	red
0.695_449.3508	2.1109	1.0779	3.41e-05	4.4667	1.81357	0.39902				1	red
0.697_94.0421	2.8493	1.5106	0.0021247	2.6727	1.58186	1.08385	Benzenol	C00146	HMDB0000228	1	red
0.702_595.5194	2.063	1.0447	0.011019	1.9579	1.54559	0.426022				1	red
0.703_556.4494	2.0579	1.0412	0.018743	1.7272	1.29453	1.14891				1	red
0.703_582.4653	2.2182	1.1494	0.0066257	2.1788	1.49274	0.486466				1	red
0.703_617.5015	2.3772	1.2492	0.0058234	2.2348	1.57717	0.414199				1	red
0.704_596.4446	2.0214	1.0154	0.0025512	2.5933	1.61632	0.210332				1	red
0.704_615.4855	2.3194	1.2137	0.0016342	2.7867	1.70384	0.538552				1	red
0.705_591.4867	3.0935	1.6292	0.00016278	3.7884	1.77554	0.52559				1	red
0.705_593.5032	2.8447	1.5083	0.0012399	2.9066	1.7443	0.372326				1	red
0.706_598.4597	2.085	1.0601	0.0038154	2.4185	1.54371	0.535364				1	red
0.707_160.0891	2.1111	1.078	0.014216	1.8472	1.52634	0.0127487	2-phenyl-4-pentenal		HMDB0035207	1	red
0.707_567.4894	2.5334	1.3411	0.0030873	2.5104	1.59787	0.284303				1	red
0.707_631.4806	2.4973	1.3204	0.0024735	2.6067	1.71582	0.278892				1	red
0.708_649.4912	2.1837	1.1267	0.0021585	2.6658	1.70611	0.589576				1	red
0.71_590.455	2.4448	1.2897	0.0026881	2.5706	1.58348	0.881197				1	red
0.71_607.4818	2.5834	1.3692	0.0023101	2.6364	1.59082	0.637052				1	red
0.711_665.4861	2.3744	1.2476	0.0083328	2.0792	1.58563	0.883631				1	red
0.712_623.4747	2.5259	1.3368	0.013219	1.8788	1.43677	1.09901				1	red
0.713_639.4689	4.0756	2.027	0.0059403	2.2262	1.535	0.960578				1	red
0.715_214.1724	2.1865	1.1286	0.0065544	2.1835	1.47053	0.801842				1	red
0.715_647.4752	2.0558	1.0397	0.023558	1.6279	1.48162	0.829225				1	red
0.716_316.24	2.9549	1.5631	0.00019335	3.7136	1.81713	0.308278	Pregnane-3,20-dione			1	red
0.717_572.4439	2.3943	1.2596	0.0051591	2.2874	1.54432	0.904961				1	red
0.731_246.1619	2.0206	1.0148	0.0098592	2.0062	1.42478	1.15351	Geroquinol	C10793		1	red
0.732_401.3315	0.15969	-2.6466	0.0070384	2.1525	1.62418	0.487069				-1	blue
0.733_401.3297	0.15702	-2.671	0.0071845	2.1436	1.61821	0.408256				-1	blue
0.733_423.3136	0.15982	-2.6455	0.0069985	2.155	1.62473	0.485492	(5z,8z,11z,14z)-n-(2-phenoxyethyl)-5,8,11,14-icosatetraenamide			-1	blue
0.737_375.3134	0.24349	-2.0381	0.016049	1.7945	1.53644	0.328494	Docosatetraenoylethanolamide	C13829	HMDB0013626	-1	blue
0.737_399.3134	0.15038	-2.7333	0.0070093	2.1543	1.62629	0.517668				-1	blue
0.738_420.3098	0.27712	-1.8514	0.0066299	2.1785	1.45473	0.0146587				-1	blue
0.742_373.2978	0.30394	-1.7182	0.011197	1.9509	1.53851	0.245337	(5z,8z,11z,14z)-1-(4-morpholinyl)-5,8,11,14-icosatetraen-1-one			-1	blue
0.767_367.2356	3.3541	1.7459	0.013536	1.8685	1.5599	0.0442751				1	red
0.783_323.2823	3.4333	1.7796	0.019893	1.7013	1.32328	1.3644	Linoleoyl ethanolamide		HMDB0012252	1	red
0.787_299.2823	2.5312	1.3398	0.0095661	2.0193	1.39134	1.36144	D-sphingosine	C00319	HMDB0000252	1	red
0.788_525.4244	0.3216	-1.6367	0.045515	1.3418	1.20963	0.373259				-1	blue
0.792_425.3288	5.3773	2.4269	0.0010644	2.9729	1.70058	0.518369				1	red
0.796_389.2936	4.2181	2.0766	0.022616	1.6456	1.32488	1.28302	4-{(z)-[(5e,8z,11z,14z)-1-hydroxy-5,8,11,14-icosatetraen-1-ylidene]amino}butanoic acid			1	red
0.797_292.2038	2.1666	1.1154	0.0097984	2.0088	1.51603	0.233047	12-oxo phytodienoic acid	C01226		1	red
0.802_503.2519	0.44523	-1.1674	0.025511	1.5933	1.40061	0.567858				-1	blue
0.803_817.4031	0.44781	-1.159	0.0019618	2.7073	1.6402	0.215025				-1	blue
0.805_365.2928	3.059	1.613	0.032133	1.4931	1.20907	1.19284	N-linoleoyl-4-aminobutyric acid		HMDB0062334	1	red
0.807_351.2408	2.4352	1.284	0.0085473	2.0682	1.49473	0.314224				1	red
0.81_341.2929	3.2114	1.6832	0.015511	1.8094	1.36596	1.34308	N-acetylsphingosine			1	red
0.81_368.2559	6.9043	2.7875	0.0013933	2.856	1.75361	0.399222	Carboprost	C06872		1	red
0.81_789.3711	0.45272	-1.1433	0.0059009	2.2291	1.51266	0.385314				-1	blue
0.815_338.2454	2.2596	1.1761	0.0077778	2.1091	1.60693	0.399415	11-deoxy-pge1			1	red
0.82_362.2457	2.3288	1.2196	0.0015387	2.8129	1.7287	0.633492	Ti1090000	C14575		1	red
0.829_391.2357	6.8837	2.7832	0.0033012	2.4813	1.70112	0.683474	2172			1	red
0.832_367.2355	5.134	2.3601	0.0057363	2.2414	1.64348	0.746034				1	red
0.833_214.1207	5.8709	2.5536	0.014366	1.8427	1.56203	0.415998	5-hexyl-2-oxotetrahydro-3-furancarboxylic acid		HMDB0030984	1	red
0.833_350.2454	4.6454	2.2158	0.015811	1.8011	1.5524	0.286982	10-gingerol	C17496	HMDB0033616	1	red
0.838_393.2514	3.8237	1.935	0.0073242	2.1352	1.64766	0.365281				1	red
0.842_340.2249	2.168	1.1164	0.02203	1.657	1.41716	0.528503	Terguride			1	red
0.845_361.2826	2.6107	1.3844	0.00019025	3.7207	1.74772	0.506642				1	red
0.845_369.2515	4.236	2.0827	0.0042789	2.3687	1.69467	0.516262				1	red
0.846_170.1308	2.3531	1.2346	0.0079812	2.0979	1.60451	0.162576	2361		HMDB0037116	1	red
0.849_137.0479	5.9215	2.566	0.015644	1.8057	1.40676	0.961449	4-aminobenzoate	C00568	HMDB0001392	1	red
0.849_162.1045	3.1911	1.674	0.00196	2.7078	1.70999	0.517884	Valerophenone		HMDB0031208	1	red
0.851_152.1203	2.0127	1.0091	0.014094	1.851	1.54478	0.1543	(+/-)-camphor	C00809		1	red
0.851_208.1102	2.5418	1.3459	0.0066995	2.174	1.63736	0.568979	Asarone	C17846	HMDB0031469	1	red
0.852_293.2354	2.9317	1.5517	5.84e-05	4.2339	1.82646	0.356182				1	red
0.853_210.1258	2.791	1.4808	0.0059594	2.2248	1.66481	0.495095	Epi-jasmonic acid	C16317		1	red
0.854_365.1626	0.12129	-3.0435	0.0094151	2.0262	1.53202	0.634476	Nequinate		HMDB0031754	-1	blue
0.855_340.2036	4.2358	2.0827	0.0057687	2.2389	1.66936	0.373757	Norethisterone acetate	C08152		1	red
0.856_120.094	2.6966	1.4311	0.018373	1.7358	1.46488	0.676212	Cumene	C14396	HMDB0034029	1	red
0.856_310.2143	3.5057	1.8097	0.025312	1.5967	1.44769	0.0361407	13(s)-hpotre	C04785		1	red
0.856_364.1886	6.4561	2.6907	0.0020655	2.685	1.74129	0.248083	4beta-phorbol	C09155		1	red
0.857_397.1523	0.13253	-2.9156	0.017328	1.7613	1.46811	0.696707	(+)-aureothin	C15689		-1	blue
0.858_108.0576	3.6641	1.8735	0.0039342	2.4051	1.61162	1.00163	P-cresol	C01468	HMDB0001858	1	red
0.858_276.2088	3.1092	1.6365	2.7e-05	4.5687	1.85049	0.343624	(e)-parinaric acid			1	red
0.859_399.1469	0.096918	-3.3671	0.014869	1.8277	1.47314	0.913809				-1	blue
0.86_351.147	0.1379	-2.8583	0.01358	1.8671	1.4857	0.758683	Zindoxifene	C14745		-1	blue
0.863_180.1152	2.2958	1.199	0.014344	1.8433	1.55667	0.756802	3-bha		HMDB0059925	1	red
0.864_122.1097	2.1514	1.1053	0.0062425	2.2046	1.58543	1.02908	3-allylcyclohexene		HMDB0061784	1	red
0.864_148.089	3.0372	1.6028	0.00062924	3.2012	1.78646	0.362536	Trans-anethole	C10428		1	red
0.864_318.2194	2.9922	1.5812	0.00010958	3.9603	1.84292	0.0439235	15-deoxy-δ12,14-prostaglandin a1			1	red
0.864_319.1418	0.14441	-2.7918	0.012475	1.904	1.47939	1.15171	Proquinolate			-1	blue
0.865_288.1143	0.3792	-1.399	0.02599	1.5852	1.31459	0.0120638	R-soterenol	C11769		-1	blue
0.865_366.2042	4.6141	2.2061	0.0030674	2.5132	1.72653	0.31784	Dibutoxyethylphthalate	C15438		1	red
0.867_383.119	0.15352	-2.7035	0.018154	1.741	1.46395	0.581149				-1	blue
0.868_318.1367	0.31815	-1.6522	0.040112	1.3967	1.34402	1.06403	[similar to: prostaglandin d1; δmass: -36.1040 da]			-1	blue
0.869_138.1045	5.2345	2.388	0.0014973	2.8247	1.75267	0.466741	Isophorone	C14743	HMDB0031195	1	red
0.869_302.1881	6.5447	2.7103	0.00087257	3.0592	1.76874	0.127395	11-ketotestosterone	C14256		1	red
0.87_313.2406	2.5696	1.3616	0.0018177	2.7405	1.59324	0.434799				1	red
0.87_413.2619	2.2704	1.1829	0.015379	1.8131	1.28405	1.11795				1	red
0.87_438.1579	0.1198	-3.0613	0.017457	1.758	1.46813	0.614549				-1	blue
0.871_411.2443	2.7906	1.4806	0.0048583	2.3135	1.43602	0.698706				1	red
0.872_387.2442	2.2431	1.1655	0.0022065	2.6563	1.55333	0.464912				1	red
0.872_413.2779	2.9256	1.5487	0.0032166	2.4926	1.7038	0.427092				1	red
0.872_435.2446	2.4834	1.3123	0.0075775	2.1205	1.37857	0.878341				1	red
0.873_148.1254	3.7412	1.9035	0.0072301	2.1409	1.50235	0.167504	N-amylbenzene		HMDB0059834	1	red
0.873_425.3289	4.1277	2.0453	0.0047589	2.3225	1.54042	0.896238				1	red
0.874_363.2442	2.2163	1.1482	0.001775	2.7508	1.52216	0.121826	N-palmitoyl taurine			1	red
0.874_404.2709	2.2018	1.1387	0.0096361	2.0161	1.35471	0.654697				1	red
0.876_178.0995	3.6856	1.8819	0.0013961	2.8551	1.74292	0.553132	Benzyl butyrate		HMDB0033376	1	red
0.881_236.1414	5.2595	2.3949	0.0036554	2.4371	1.70676	0.27787	4-(heptyloxy)benzoic acid	C14274		1	red
0.882_261.1153	0.13854	-2.8516	0.0043887	2.3577	1.62954	0.674344				-1	blue
0.883_196.1103	2.1809	1.1249	0.0020621	2.6857	1.69169	0.259744	Hexyl 2-furoate		HMDB0037725	1	red
0.885_108.094	3.5243	1.8174	0.0028792	2.5407	1.63621	0.781832	4-vinylcyclohexene	C19310		1	red
0.89_194.131	3.6766	1.8784	0.004332	2.3633	1.67866	0.411348	Sedanolide	C17002	HMDB0034450	1	red
0.894_277.095	0.30701	-1.7036	0.016918	1.7716	1.48938	1.01097				-1	blue
0.905_411.2621	5.2582	2.3946	0.0040779	2.3896	1.67573	0.591469				1	red
0.913_179.0949	0.37174	-1.4276	0.03693	1.4326	1.32615	0.249901	Salsolinol	C09642	HMDB0042012	-1	blue
0.914_215.1524	0.38585	-1.3739	0.0046693	2.3308	1.54376	0.489278	11343172	C18830		-1	blue
0.919_403.2755	2.2025	1.1391	0.022118	1.6553	1.34955	1.12031				1	red
0.921_376.2248	4.1046	2.0372	0.0091821	2.0371	1.57728	0.700997	Resolvin d2	C18179		1	red
0.923_261.1002	0.33115	-1.5945	0.048875	1.3109	1.32997	1.25086				-1	blue
0.927_172.1102	6.2031	2.633	0.0042652	2.3701	1.68894	0.50205	Oi1695000		HMDB0040165	1	red
0.94_353.1262	0.16339	-2.6136	0.012276	1.911	1.49996	0.894166	Protopine	C05189	HMDB0003920	-1	blue
0.947_405.2725	5.3118	2.4092	0.0062946	2.201	1.6644	0.397998				1	red
0.953_284.0684	0.17294	-2.5317	0.020866	1.6806	1.44316	0.54079	Olmelin	C00814	HMDB0002338	-1	blue
0.953_369.27	0.20028	-2.3199	0.0010402	2.9829	1.64937	0.006471				-1	blue
0.954_266.0579	0.14265	-2.8095	0.019388	1.7125	1.43909	0.754379	Phenanthrene-4,5-dicarboxylate	C18252		-1	blue
0.956_403.142	0.11184	-3.1605	0.011302	1.9469	1.50011	0.520616				-1	blue
0.958_263.0946	0.18843	-2.4079	0.026716	1.5732	1.38495	0.927904	?-naphthyl anthranilate		HMDB0039873	-1	blue
1.036_397.1678	0.14503	-2.7855	0.0073056	2.1363	1.60905	0.53795				-1	blue
1.059_371.2671	6.6387	2.7309	0.03822	1.4177	1.42943	0.277341				1	red
1.075_391.1784	0.12681	-2.9793	0.024186	1.6164	1.4008	0.961475	S-hexyl-glutathione	C02886		-1	blue
1.077_425.1629	0.17832	-2.4875	0.043141	1.3651	1.32577	1.11164	Domperidone		HMDB0015315	-1	blue
1.079_378.1664	0.17358	-2.5263	0.014321	1.844	1.45247	0.647141	Cnicin	C09362		-1	blue
1.097_377.1627	0.14485	-2.7874	0.019058	1.7199	1.46166	0.889596				-1	blue
1.099_409.1349	0.14133	-2.8228	0.036104	1.4424	1.32103	0.775836				-1	blue
1.137_277.1103	0.22224	-2.1698	0.026328	1.5796	1.41536	0.999801	At6200000			-1	blue
1.143_426.1663	0.031687	-4.98	0.0084316	2.0741	1.50631	0.753037	Mangostanol		HMDB0029868	-1	blue
1.154_237.1731	3.209	1.6821	0.024469	1.6114	1.39208	0.348448	4808			1	red
1.164_179.0949	0.26163	-1.9344	0.021808	1.6614	1.40527	0.788204	Phenacetin	C07591		-1	blue
1.169_385.0984	0.19862	-2.3319	0.022389	1.65	1.43389	0.737255				-1	blue
1.213_133.0564	2.3097	1.2077	0.024859	1.6045	1.48618	0.296956	(1e)-n-hydroxy-4-(methylsulfanyl)-1-butanimine	C17241		1	red
1.216_203.1164	3.2222	1.6881	0.00074923	3.1254	1.76919	0.324504	Acetylcarnitine			1	red
1.232_171.0898	4.6422	2.2148	0.0078149	2.1071	1.53735	0.860875	Butyryl-l-homoserine lactone	C11837		1	red
1.233_464.174	0.25321	-1.9816	0.035924	1.4446	1.38612	0.786033				-1	blue
1.237_335.1157	0.20563	-2.2819	0.030133	1.521	1.38947	0.850791	Berberine	C00757	HMDB0003409	-1	blue
1.262_222.1007	0.40036	-1.3206	0.041249	1.3846	1.3631	1.11364	Gly-phe		HMDB0028848	-1	blue
1.278_532.3192	2.1868	1.1288	0.041881	1.378	1.17099	0.407945				1	red
13.421_273.1802	0.049348	-4.3409	0.015046	1.8226	1.39127	1.27137	Val-arg			-1	blue
13.44_102.1158	0.0041114	-7.9262	0.0019683	2.7059	1.54722	0.697163	Cadaverine	C01672	HMDB0002322	-1	blue
13.641_174.112	0.039228	-4.672	0.039344	1.4051	1.30867	0.940807	L-arginine	C00062	HMDB0000517	-1	blue
3.246_397.1679	0.17128	-2.5455	0.018147	1.7412	1.47792	1.05687				-1	blue
3.267_398.1712	0.18045	-2.4703	0.01339	1.8732	1.53448	0.877374	N-benzoyl-d-arginine-4-nitroanilide	C04303		-1	blue
3.438_383.1522	0.14706	-2.7655	0.0091167	2.0402	1.58163	0.564689	Meropenem		HMDB0014898	-1	blue
3.781_463.3068	0.36298	-1.462	0.028891	1.5392	1.33302	0.010334				-1	blue
3.929_464.1741	0.17934	-2.4793	0.028018	1.5526	1.39077	1.10618				-1	blue
4.25_463.3068	0.28434	-1.8143	0.014319	1.8441	1.43353	0.338007				-1	blue
5.22_407.1367	0.19598	-2.3512	0.016495	1.7826	1.4925	0.956889	(1,2-dimethoxy-12-methyl-12,13-dihydro[1,3]benzodioxolo[5,6-c]phenanthridin-13-yl)acetic acid		HMDB0029832	-1	blue
7.034_214.132	0.35996	-1.4741	0.033635	1.4732	1.20543	1.61762	Valylproline		HMDB0029135	-1	blue
7.132_574.3985	0.23125	-2.1125	0.03265	1.4861	1.14128	0.187717				-1	blue
7.15_381.1722	2.6972	1.4315	0.048714	1.3123	1.24169	0.206642	Xaliproden			1	red
7.181_292.0561	0.23918	-2.0639	0.028412	1.5465	1.24318	1.46195				-1	blue
7.255_281.1263	0.23578	-2.0845	0.02879	1.5408	1.40162	1.31141	Trimetozine			-1	blue
7.268_403.1542	4.2248	2.0789	0.0054181	2.2662	1.49621	0.305942	Amibegron			1	red
7.272_299.1369	0.23167	-2.1099	0.045522	1.3418	1.29846	1.46899				-1	blue
9.578_259.1533	0.076308	-3.712	0.042317	1.3735	1.20343	1.33921	Leu-gln		HMDB0028927	-1	blue
0.653_204.0088	0.062787	-3.9934	0.026151	1.5825	1.34229	1.10143	Guaiacol sulfate		HMDB0060013	-1	blue
0.655_427.2205	5.9806	2.5803	0.0088312	2.054	1.44734	1.22494				1	red
0.658_405.2364	2.9365	1.5541	0.039507	1.4033	1.26489	1.15434				1	red
0.659_403.2207	5.0603	2.3392	0.010021	1.9991	1.44242	1.149				1	red
0.662_205.9879	0.1142	-3.1304	0.016725	1.7766	1.35844	0.710871	5-sulfooxymethylfurfural		HMDB0059752	-1	blue
0.662_379.2207	3.9432	1.9794	0.0054079	2.267	1.49777	1.1564				1	red
0.667_188.014	0.026093	-5.2602	0.018633	1.7297	1.37341	0.841037	P-cresylsulfate		HMDB0011635	-1	blue
0.67_189.9932	0.043544	-4.5214	0.021257	1.6725	1.3278	0.96038	Mfcd12546417	C06674		-1	blue
0.674_173.9983	0.038559	-4.6968	0.032271	1.4912	1.27202	0.854203	4-phenolsulfonic acid	C12849		-1	blue
0.678_258.9755	0.036635	-4.7706	0.024674	1.6078	1.34226	0.981626				-1	blue
0.698_203.0248	0.013874	-6.1714	0.014911	1.8265	1.38631	0.645519	Cystathionine ketimine		HMDB0002015	-1	blue
0.702_424.2977	0.31183	-1.6812	0.034303	1.4647	1.37571	0.922103	(1r,3s,5z)-5-[(2e)-2-{(1r,3as,7ar)-1-[(2r,3e,5e,7e)-9-hydroxy-3,5,7-nonatrien-2-yl]-7a-methyloctahydro-4h-inden-4-ylidene}ethylidene]-4-methylene-1,3-cyclohexanediol			-1	blue
0.708_682.5876	2.1915	1.1319	0.0050434	2.2973	1.49862	0.416443				1	red
0.715_665.5958	2.5619	1.3572	0.0022684	2.6443	1.52203	0.462154				1	red
0.717_668.448	5.1484	2.3641	0.0057735	2.2386	1.385	0.570399	[similar to: ethyl myristate; δmass: 412.2078 da]			1	red
0.719_401.3288	0.18334	-2.4474	0.011626	1.9346	1.45091	0.653335				-1	blue
0.72_279.0071	0.10915	-3.1957	0.009965	2.0015	1.47472	0.240761				-1	blue
0.721_189.0092	0.021109	-5.566	0.0061173	2.2134	1.50666	0.485352	Lanthionine ketimine		HMDB0004823	-1	blue
0.721_281.002	0.029463	-5.0849	0.023852	1.6225	1.33179	0.867824				-1	blue
0.721_423.3127	0.26245	-1.9299	0.014982	1.8244	1.42338	0.626808	(5z,8z,11z,14z)-n-(2-phenoxyethyl)-5,8,11,14-icosatetraenamide			-1	blue
0.723_260.1768	0.38059	-1.3937	0.043423	1.3623	1.25638	1.04489	1,9-heptadecadien-4,6-diyn-3,8-diol			-1	blue
0.723_375.313	0.22673	-2.1409	0.013435	1.8718	1.49608	0.37493	Docosatetraenoylethanolamide	C13829	HMDB0013626	-1	blue
0.723_399.3129	0.19963	-2.3246	0.01833	1.7368	1.35736	0.73314				-1	blue
0.724_776.537	0.17137	-2.5448	0.026582	1.5754	1.27733	0.0872201				-1	blue
0.725_480.3802	2.0926	1.0653	0.0083574	2.0779	1.44386	0.342242				1	red
0.73_588.2608	0.026978	-5.2121	0.02927	1.5336	1.29837	0.66354				-1	blue
0.734_452.3132	0.27728	-1.8506	0.0028087	2.5515	1.54745	1.07044				-1	blue
0.735_213.009	0.017296	-5.8534	0.017263	1.7629	1.40148	0.838411	3-indoxyl sulphate		HMDB0000682	-1	blue
0.735_450.2982	0.48644	-1.0397	0.040153	1.3963	1.20022	1.35143				-1	blue
0.738_378.2036	2.986	1.5782	0.0040124	2.3966	1.4371	0.2286	Mfcd00273304	C15291		1	red
0.739_414.2526	0.41385	-1.2728	0.029661	1.5278	1.34408	1.18104				-1	blue
0.741_392.2684	0.30221	-1.7264	0.0042116	2.3755	1.52455	0.817262				-1	blue
0.742_282.1247	0.20368	-2.2956	0.04911	1.3088	1.3281	0.758919	Erteberel			-1	blue
0.742_347.2817	4.5784	2.1948	0.0086998	2.0605	1.35344	1.24893	Anandamide	C11695	HMDB0004080	1	red
0.743_390.2529	0.30576	-1.7095	0.0053765	2.2695	1.55019	0.921669				-1	blue
0.744_410.2771	7.1187	2.8316	0.0047265	2.3255	1.42571	1.14351				1	red
0.748_323.2818	3.4565	1.7893	0.014184	1.8482	1.29344	1.18053	Mfcd00674434		HMDB0012252	1	red
0.748_393.2872	4.4481	2.1532	0.0088801	2.0516	1.35086	1.24485				1	red
0.753_230.1148	4.2857	2.0995	0.0039648	2.4018	1.52163	1.07364				1	red
0.754_382.2349	2.9998	1.5849	0.0059501	2.2255	1.52915	0.120591	Sarcostin	C17770		1	red
0.755_345.2873	2.4555	1.296	0.0039224	2.4064	1.4568	1.11202				1	red
0.755_386.2774	2.7295	1.4486	0.0064332	2.1916	1.43656	1.21982				1	red
0.762_422.2295	3.8485	1.9443	0.0062024	2.2074	1.4541	0.60619	Picrasin c	C08776		1	red
0.765_212.1045	3.5469	1.8266	0.0085693	2.0671	1.5334	0.875036	Guaietolin			1	red
0.766_477.1985	2.1293	1.0904	0.018151	1.7411	1.35701	0.250676				1	red
0.77_218.0242	0.08396	-3.5742	0.0066343	2.1782	1.52045	0.367007	4-(2-hydroxyethyl)phenyl hydrogen sulfate		HMDB0041785	-1	blue
0.773_371.1513	0.32539	-1.6197	0.0045531	2.3417	1.52189	0.00268095	Trazodone	C07156	HMDB0014794	-1	blue
0.774_220.0035	0.036178	-4.7887	0.00971	2.0128	1.43689	0.568886				-1	blue
0.775_379.1412	0.16424	-2.6061	0.032134	1.493	1.3185	0.988565	Angoline	C09336		-1	blue
0.779_396.2141	3.5055	1.8096	0.0011977	2.9217	1.69395	0.321375	6737			1	red
0.78_263.0608	0.32908	-1.6035	0.042304	1.3736	1.31461	1.10822				-1	blue
0.783_462.2086	6.729	2.7504	0.0032835	2.4837	1.56751	0.659056	Patrinoside	C11640		1	red
0.783_479.199	4.1567	2.0554	0.0067298	2.172	1.54025	0.490596				1	red
0.786_159.0682	2.0633	1.045	0.0097101	2.0128	1.47948	0.713428	Indole-3-acetaldehyde	C00637	HMDB0001190	1	red
0.789_254.0936	0.22355	-2.1613	0.018216	1.7395	1.41701	1.01685	Ketoprofen	C01716	HMDB0015144	-1	blue
0.791_435.2433	2.3018	1.2028	0.0042636	2.3702	1.50699	0.864568				1	red
0.794_284.104	0.37669	-1.4085	0.043714	1.3594	1.26759	1.02936	Caffeic acid phenethyl ester	C10484		-1	blue
0.795_281.002	0.053633	-4.2207	0.046878	1.329	1.23417	0.937133				-1	blue
0.796_331.214	0.23039	-2.1178	0.02654	1.5761	1.27532	0.744873	Megastachine	C09888		-1	blue
0.802_411.2434	2.1846	1.1274	0.0014679	2.8333	1.57431	0.81375				1	red
0.804_325.1307	0.14058	-2.8305	0.0045774	2.3394	1.60589	0.459304	(s)-(+)-bulbocapnine	C09367		-1	blue
0.804_398.2296	2.868	1.5201	0.012643	1.8982	1.4903	0.0333368				1	red
0.807_203.0579	0.24058	-2.0554	0.021706	1.6634	1.41546	0.991798	Indole-3-pyruvic acid	C00331	HMDB0060484	-1	blue
0.807_317.1984	0.19609	-2.3504	0.024506	1.6107	1.27549	0.35183	(+/-)-tetrabenazine	C11168	HMDB0015592	-1	blue
0.809_180.0784	0.14969	-2.74	0.0070114	2.1542	1.54492	0.0119674	Propylparaben	D01422	HMDB0032574	-1	blue
0.828_260.0942	0.31575	-1.6631	0.033121	1.4799	1.39951	0.700157				-1	blue
0.838_289.1669	0.14817	-2.7547	0.007003	2.1547	1.44051	0.592476	Atropine	C01479	HMDB0014712	-1	blue
0.844_240.0779	0.18161	-2.4611	0.014882	1.8273	1.47339	0.830928	3-hydroxyflavanone	C15570		-1	blue
0.847_401.2229	4.6964	2.2316	0.00060059	3.2214	1.70359	0.0335508				1	red
0.851_168.0784	2.2594	1.1759	0.048627	1.3131	1.34658	0.645014	Dc2810000		HMDB0059963	1	red
0.852_277.1094	0.19099	-2.3884	0.020889	1.6801	1.44759	0.914703	At6200000			-1	blue
0.862_431.2145	2.5689	1.3612	0.0026668	2.574	1.59301	0.0377586				1	red
0.862_457.2301	2.8094	1.4903	0.015954	1.7971	1.35665	0.18512				1	red
0.867_119.037	0.39902	-1.3255	0.048535	1.3139	1.29351	1.1842	Phenylisocyanate		HMDB0062270	-1	blue
0.868_419.2516	3.6054	1.8502	0.0085892	2.066	1.31288	0.536498				1	red
0.87_205.0734	0.1817	-2.4604	0.028371	1.5471	1.27776	1.38951	5-methoxyindoleacetic acid	C05660	HMDB0004096	-1	blue
0.873_263.0938	0.15624	-2.6782	0.011837	1.9268	1.50074	0.622912	?-naphthyl anthranilate		HMDB0039873	-1	blue
0.874_179.0943	0.41842	-1.257	0.039394	1.4046	1.28886	1.19189	Phenacetin	C07591		-1	blue
0.876_414.2245	2.5899	1.3729	0.0087755	2.0567	1.54474	0.7522	Methyl 5-hydroperoxy-5-{5'-[(1e,3e)-1,3-nonadien-1-yl]-3,3'-bi-1,2-dioxol-5-yl}pentanoate			1	red
0.879_161.0838	0.44947	-1.1537	0.047184	1.3262	1.24592	1.26773	3-(2-hydroxyethyl)indole	C00955	HMDB0003447	-1	blue
0.888_206.0574	0.17571	-2.5087	0.030906	1.51	1.2791	1.29331	Scoparone	C09311	HMDB0030818	-1	blue
0.889_270.0884	0.16907	-2.5643	0.024173	1.6167	1.38225	0.915796	Imperatorin	C09269	HMDB0034376	-1	blue
0.895_233.0682	0.33971	-1.5576	0.029252	1.5338	1.42317	0.625928	Casimiroin	C10654	HMDB0033349	-1	blue
0.915_424.2271	0.39921	-1.3248	0.044036	1.3562	1.30879	0.539551	Licoricidin	C16986	HMDB0034183	-1	blue
0.918_364.2159	0.46672	-1.0994	0.032753	1.4847	1.35283	0.886474				-1	blue
0.961_329.2638	0.49902	-1.0028	0.03341	1.4761	1.25167	0.265297	[similar to: docosahexaenoic acid; δmass: 1.0235 da]			-1	blue
0.963_630.4631	0.49704	-1.0086	0.047066	1.3273	1.27986	1.26988				-1	blue
0.964_232.1306	2.4384	1.286	0.037323	1.428	1.15294	1.20975				1	red
1.002_122.0366	0.28838	-1.794	0.045048	1.3463	1.18271	1.36184	4-hydroxybenzaldehyde	C00633	HMDB0011718	-1	blue
1.042_166.0627	0.1048	-3.2543	0.0043852	2.358	1.58166	0.352378	3-(4-hydroxyphenyl)propionic acid	C01744	HMDB0002199	-1	blue
1.047_268.2031	0.33526	-1.5766	0.022286	1.652	1.39398	0.413437				-1	blue
1.06_394.2742	0.4276	-1.2257	0.036218	1.4411	1.34542	0.470477				-1	blue
1.064_350.2117	0.3559	-1.4904	0.019133	1.7182	1.43405	0.901867				-1	blue
1.083_365.1617	0.14072	-2.8291	0.020333	1.6918	1.44141	0.613462	Nequinate		HMDB0031754	-1	blue
1.086_292.203	2.6254	1.3925	0.022939	1.6394	1.42768	0.828063	12-oxo phytodienoic acid	C01226		1	red
1.102_355.2716	24.102	4.5911	0.0067819	2.1686	1.53606	0.0237189				1	red
1.102_378.2428	0.47877	-1.0626	0.0040033	2.3976	1.59896	0.751842				-1	blue
1.103_265.0731	0.14771	-2.7592	0.013846	1.8587	1.49131	0.647454	Oxycinchophen			-1	blue
1.106_200.1044	3.8353	1.9393	0.0079166	2.1015	1.42606	1.10001	(+/-)-camphoric acid		HMDB0034491	1	red
1.107_294.2186	3.8458	1.9433	0.013539	1.8684	1.44067	0.430002	13(s)-hotre	C16316		1	red
1.111_350.0089	0.41673	-1.2628	0.00023134	3.6358	1.58052	0.586129	Apigenin 7-sulfate		HMDB0037851	-1	blue
1.122_298.0945	0.25296	-1.983	0.019213	1.7164	1.4576	0.740249	Amlexanox		HMDB0015160	-1	blue
1.123_431.1358	0.096971	-3.3663	0.0044317	2.3534	1.56905	0.394491	Tiodazosin			-1	blue
1.128_330.2457	2.1715	1.1187	0.033047	1.4809	1.06816	0.496593				1	red
1.132_243.0561	0.17656	-2.5017	0.005168	2.2867	1.42002	0.698625				-1	blue
1.14_399.1461	0.098669	-3.3413	0.012138	1.9159	1.49625	0.583623	S-(5'-adenosyl)-l-methionine conjugate acid		HMDB0001185	-1	blue
1.166_334.1157	0.078274	-3.6753	0.0007108	3.1483	1.71547	0.431541				-1	blue
1.168_271.12	0.11775	-3.0862	0.0096246	2.0166	1.53092	0.670905	7,8-didehydro-4,5-epoxymorphinan-3,6-diol			-1	blue
1.18_297.2377	3.6876	1.8827	0.040826	1.3891	1.27189	0.364357				1	red
1.204_224.0892	0.32433	-1.6245	0.04157	1.3812	1.25495	0.882175				-1	blue
1.217_863.606	0.17531	-2.512	0.0053494	2.2717	1.53699	0.283449				-1	blue
1.231_839.6058	0.11024	-3.1812	0.0096505	2.0154	1.50184	0.335135				-1	blue
1.236_837.5911	0.054662	-4.1933	0.014849	1.8283	1.43813	0.37761				-1	blue
1.261_811.5739	0.038347	-4.7047	0.022543	1.647	1.40733	0.494607				-1	blue
1.27_814.5927	0.035494	-4.8163	0.046891	1.3289	1.25819	0.733915				-1	blue
1.289_815.6043	0.07137	-3.8085	0.015452	1.811	1.4193	0.390113				-1	blue
1.295_192.0531	0.26864	-1.8962	0.038215	1.4178	1.30584	1.16216				-1	blue
1.296_351.1464	0.097767	-3.3545	0.0075391	2.1227	1.55617	0.433975	Zindoxifene	C14745		-1	blue
1.324_787.574	0.06892	-3.8589	0.034393	1.4635	1.33697	0.386026				-1	blue
1.367_475.3247	0.22872	-2.1284	0.020954	1.6787	1.34025	1.06166				-1	blue
1.374_383.1184	0.060794	-4.0399	0.0071025	2.1486	1.45924	0.171845				-1	blue
1.391_338.2449	2.45	1.2928	0.0086144	2.0648	1.45834	0.0452243	(+/-)11(12)-dihet			1	red
1.415_779.5691	0.48728	-1.0372	0.020834	1.6812	1.4213	0.0222827				-1	blue
1.433_232.073	0.18234	-2.4553	0.020516	1.6879	1.38354	1.1399	2-methyl-5-acetonyl-7-hydroxychromone		HMDB0030813	-1	blue
1.467_320.1114	0.38025	-1.395	0.046334	1.3341	1.26841	1.14782				-1	blue
1.47_383.1069	0.22899	-2.1266	0.031244	1.5052	1.33221	1.20683	Succinyladenosine		HMDB0000912	-1	blue
1.581_334.0142	0.47012	-1.0889	0.0065807	2.1817	1.26602	0.754816	4-[(z)-(6-hydroxy-3-oxo-1-benzofuran-2(3h)-ylidene)methyl]phenyl hydrogen sulfate		HMDB0137537	-1	blue
1.585_196.0845	0.26108	-1.9374	0.017871	1.7479	1.37693	0.748975	5-nitro-2-propoxyaniline		HMDB0037688	-1	blue
1.602_146.0941	2.6588	1.4108	0.021791	1.6617	1.34224	1.02142	N-butyl lactate		HMDB0040254	1	red
1.606_401.2407	2.1002	1.0706	0.00043248	3.364	1.63916	0.0852745	6-hydroxybuspirone		HMDB0061110	1	red
1.618_404.2879	2.3183	1.2131	0.038637	1.413	1.13639	1.10336				1	red
1.631_338.245	2.2969	1.1997	0.0094089	2.0265	1.47376	0.476889	(+/-)8(9)-dihet			1	red
1.633_341.2923	2.471	1.3051	0.034101	1.4672	1.20472	1.14327	N-acetylsphingosine			1	red
1.641_214.1201	2.3383	1.2255	0.02424	1.6155	1.3834	1.14263	5-hexyl-2-oxotetrahydro-3-furancarboxylic acid		HMDB0030984	1	red
1.661_254.1875	4.6059	2.2035	0.011334	1.9456	1.47339	0.0574465	Prohydrojasmon	C18538		1	red
1.722_377.2408	2.0945	1.0666	0.018606	1.7303	1.25496	0.217344				1	red
1.735_152.0471	2.6069	1.3824	0.034552	1.4615	1.22241	0.742137	2-hydroxyphenylacetic acid	C05852	HMDB0000669	1	red
1.749_165.0424	0.22271	-2.1668	0.040511	1.3924	1.30062	0.862377	Am9627000	C02803		-1	blue
1.798_417.2354	3.6177	1.8551	0.0025614	2.5915	1.58552	0.193916				1	red
1.808_350.2089	18.031	4.1724	0.0093377	2.0298	1.51708	0.106277	(-)-andrographolide	C20214		1	red
1.81_355.2432	3.7618	1.9114	0.0085706	2.067	1.48986	0.397293				1	red
1.826_354.2398	6.2866	2.6523	0.0015507	2.8095	1.62757	0.480547	8-iso-13,14-dihydro-15-keto prostaglandin f2α			1	red
1.892_266.087	0.17354	-2.5267	0.0032316	2.4906	1.56647	1.02564				-1	blue
1.933_556.2797	0.31983	-1.6446	0.00745	2.1278	1.40573	0.760739				-1	blue
1.941_195.0528	0.28737	-1.799	0.03376	1.4716	1.30507	0.932871	2-((4-nitrophenoxy)methyl)oxirane	C04274		-1	blue
1.977_353.1257	0.12923	-2.952	0.039175	1.407	1.33118	0.659735	Protopine	C05189	HMDB0003920	-1	blue
10.424_203.0038	0.35438	-1.4966	0.034359	1.464	1.19843	1.39252				-1	blue
10.43_118.0265	0.36695	-1.4464	0.034979	1.4562	1.20398	1.4038	Succinic acid	C00042	HMDB0000254	-1	blue
10.959_218.0146	2.5519	1.3516	0.0093155	2.0308	1.46204	0.0607107	[similar to: guanidinosuccinic acid; δmass: 42.9553 da]			1	red
11.924_134.0212	2.7936	1.4821	0.046221	1.3352	1.03034	0.622294	(s)-malate	C00149	HMDB0000156	1	red
2.001_314.2451	3.2464	1.6988	0.0008316	3.0801	1.68347	0.299682	(+/-)9,10-dihydroxy-12z-octadecenoic acid			1	red
2.003_200.0657	0.23664	-2.0793	0.031173	1.5062	1.26371	1.43993				-1	blue
2.004_217.0557	0.23671	-2.0788	0.02377	1.624	1.3035	1.42658				-1	blue
2.026_154.0628	4.6971	2.2318	0.0012022	2.92	1.60069	0.550315	Vanillyl alcohol	C06317	HMDB0032012	1	red
2.06_239.0248	4.619	2.2076	0.0030199	2.52	1.48199	0.283661				1	red
2.063_195.0351	4.7054	2.2343	0.004071	2.3903	1.44543	0.330176				1	red
2.092_137.0475	6.2047	2.6334	0.013585	1.8669	1.31109	1.11373	Anthranilate	C00108	HMDB0001123	1	red
2.093_205.0347	7.7963	2.9628	0.023284	1.6329	1.18997	0.937513				1	red
2.117_338.245	2.4866	1.3142	0.00075744	3.1207	1.62282	0.324546	(+/-)5(6)-dihet			1	red
2.132_566.3195	3.6416	1.8646	0.0056939	2.2446	1.53981	0.614649				1	red
2.142_400.1837	3.3476	1.7431	0.0062972	2.2009	1.50998	0.853717				1	red
2.143_172.1097	2.4243	1.2776	0.00063583	3.1967	1.64125	0.705846	Oi1695000		HMDB0040165	1	red
2.177_248.1154	0.31732	-1.656	0.036078	1.4428	1.37289	0.520649	6-hydroxymelatonin	C05643	HMDB0004081	-1	blue
2.192_378.24	3.82	1.9336	0.0044532	2.3513	1.56824	0.414938	(1s,2r,3s,4s,6r,7r,8r,14s)-3-hydroxy-2,4,7,14-tetramethyl-9-oxo-4-vinyltricyclo[5.4.3.0~1,8~]tetradec-6-yl glycolate	C09169		1	red
2.22_441.2354	3.9976	1.9992	0.0026076	2.5838	1.57769	0.250815				1	red
2.235_396.2982	0.24968	-2.0019	0.018281	1.738	1.37845	0.411696				-1	blue
2.241_459.2936	0.22403	-2.1582	0.020841	1.6811	1.33402	0.632001				-1	blue
2.266_270.052	0.22418	-2.1573	0.047442	1.3238	1.26724	0.981274	Genistein	C06563	HMDB0003217	-1	blue
2.296_394.2825	0.34156	-1.5498	0.034623	1.4606	1.29795	0.357358				-1	blue
2.299_457.2779	0.31803	-1.6528	0.028664	1.5427	1.32961	0.600678				-1	blue
2.306_391.2198	21.267	4.4105	0.0074747	2.1264	1.45807	0.193763				1	red
2.317_367.1407	0.31032	-1.6882	0.0088116	2.0549	1.37166	0.656403	26uep3z5w8	C10939		-1	blue
2.323_463.3051	0.22964	-2.1225	0.0070758	2.1502	1.41423	0.0508486				-1	blue
2.357_195.0562	0.2039	-2.2941	0.010276	1.9882	1.42309	0.249849				-1	blue
2.361_370.2825	0.28765	-1.7976	0.031566	1.5008	1.31941	0.697291				-1	blue
2.362_433.278	0.26767	-1.9015	0.028215	1.5495	1.31681	0.891483				-1	blue
2.374_417.2354	3.9804	1.9929	0.0071525	2.1455	1.50594	0.33472				1	red
2.377_150.0348	0.27354	-1.8702	0.045751	1.3396	1.14211	1.42806	2-hydroxy-4-(methylthio)butyric acid			-1	blue
2.39_391.072	0.18112	-2.465	0.029719	1.527	1.35076	0.582817				-1	blue
2.44_380.1691	0.3691	-1.4379	0.040876	1.3885	1.16849	1.52808				-1	blue
2.444_317.1734	0.43975	-1.1852	0.017017	1.7691	1.19878	1.14838	Leucyltryptophan		HMDB0028940	-1	blue
2.503_393.2355	8.4702	3.0824	0.0046321	2.3342	1.54853	0.129546				1	red
2.515_347.1879	0.1621	-2.625	0.02491	1.6036	1.40168	0.692064	3,8-dimethyl-3-(4-methyl-3-penten-1-yl)-3,11-dihydropyrano[3,2-a]carbazol-9-ol		HMDB0038828	-1	blue
2.515_748.5731	0.23512	-2.0885	0.011703	1.9317	1.38592	0.350646				-1	blue
2.559_314.2086	2.6342	1.3974	0.00081383	3.0895	1.65468	0.38003				1	red
2.565_417.2354	2.871	1.5216	0.0039524	2.4031	1.50962	0.353898				1	red
2.592_586.2624	0.48502	-1.0439	0.040017	1.3978	1.32422	0.27771				-1	blue
2.602_219.089	3.5558	1.8302	0.0019842	2.7024	1.61585	0.516952	Aniracetam	C13355		1	red
2.617_393.2355	9.9999	3.3219	0.0038095	2.4191	1.54492	0.421536				1	red
2.629_293.1046	0.19894	-2.3296	0.026458	1.5774	1.41408	0.6763	Oxaprozin	C07356	HMDB0015126	-1	blue
2.634_381.1721	0.19287	-2.3743	0.032709	1.4853	1.34708	1.04293	Xaliproden			-1	blue
2.636_425.1619	0.1871	-2.4181	0.026415	1.5782	1.42648	0.688953	Domperidone		HMDB0015315	-1	blue
2.638_113.0588	0.10069	-3.312	0.0045624	2.3408	1.49058	0.328445	Creatinine	C00791	HMDB0000562	-1	blue
2.648_606.327	0.4503	-1.151	0.042813	1.3684	1.19828	0.909421				-1	blue
2.713_419.2513	8.0953	3.0171	0.0055777	2.2535	1.52222	0.468287				1	red
2.743_333.1723	0.19832	-2.3341	0.028555	1.5443	1.37084	0.891028	Enpromate			-1	blue
2.767_393.2354	15.582	3.9618	0.0024363	2.6133	1.58976	0.317556				1	red
2.784_449.2252	3.3699	1.7527	0.0051238	2.2904	1.45802	0.0709504				1	red
2.786_386.2298	3.5224	1.8166	0.0013347	2.8746	1.55869	0.12535	Oleandolide	C11990		1	red
2.925_246.0845	2.0214	1.0153	0.014462	1.8398	1.42645	1.14961	Dihydrouridine		HMDB0000497	1	red
2.925_397.1669	0.18609	-2.4259	0.011955	1.9225	1.49888	0.837257				-1	blue
2.983_393.2354	17.25	4.1085	0.0044355	2.3531	1.54912	0.413354				1	red
2_132.0785	0.29002	-1.7858	0.020169	1.6953	1.31636	1.39741	6-hydroxycaproic acid	C06103	HMDB0012843	-1	blue
3.025_185.1049	4.1577	2.0558	0.0039926	2.3987	1.58158	0.610019	Otonecine	C10356		1	red
3.029_205.0734	0.028376	-5.1392	0.0012335	2.9088	1.5652	0.778115	Cinnamoylglycine		HMDB0011621	-1	blue
3.03_435.2096	3.4874	1.8022	0.035473	1.4501	1.18754	0.291099	Trimazosin			1	red
3.032_372.2142	3.6309	1.8603	0.023157	1.6353	1.25461	0.12964				1	red
3.081_239.0611	0.21031	-2.2494	0.031649	1.4996	1.26892	1.17437	N-acetyl(phenyl)cysteine		HMDB0042011	-1	blue
3.103_302.1009	0.0739	-3.7583	0.0028582	2.5439	1.54004	0.511287	Terizidone			-1	blue
3.109_319.1275	0.087199	-3.5195	0.0066897	2.1746	1.52207	0.875747				-1	blue
3.126_193.0736	0.030838	-5.0191	0.009642	2.0158	1.466	0.408601	Phenylacetylglycine	C05598	HMDB0000821	-1	blue
3.278_385.0976	0.3451	-1.5349	0.041784	1.379	1.32006	0.970131				-1	blue
3.362_179.0579	0.027842	-5.1666	0.048748	1.312	1.1998	0.58072	Hippurate	C01586	HMDB0000714	-1	blue
3.366_438.2972	2.1344	1.0938	0.020109	1.6966	1.33715	1.09789				1	red
3.375_354.2399	3.0119	1.5907	0.0067268	2.1722	1.46161	0.577342	Ent-prostaglandin f2α			1	red
3.398_393.2354	17.274	4.1105	0.0030987	2.5088	1.57951	0.379788				1	red
3.452_159.0892	0.42995	-1.2178	0.021594	1.6657	1.33864	0.982402	N-isovalerylglycine		HMDB0000678	-1	blue
3.529_297.1067	0.48161	-1.0541	0.0066517	2.1771	1.42453	0.293837	N2-methylguanosine		HMDB0005862	-1	blue
3.557_104.0473	0.40061	-1.3197	0.037266	1.4287	1.10888	1.10961	4-hydroxybutyric acid (ghb)	C00989	HMDB0000710	-1	blue
3.633_337.1303	0.26813	-1.899	0.0018171	2.7406	1.58348	0.291881	Ufenamate			-1	blue
3.641_274.1345	0.29002	-1.7858	0.0013258	2.8775	1.57282	0.499166				-1	blue
3.644_232.0842	0.12419	-3.0094	0.019049	1.7201	1.37673	0.00925268	Phenobarbital	C07434	HMDB0015305	-1	blue
3.653_406.2117	8.6551	3.1135	0.0052081	2.2833	1.57056	0.518419	Tosedostat			1	red
3.654_370.2349	8.6626	3.1148	0.0036263	2.4405	1.59071	0.502819	6-ketoprostaglandin f1α	C05961	HMDB0002886	1	red
3.655_451.2412	8.8136	3.1397	0.0023249	2.6336	1.60862	0.439056				1	red
3.66_433.2304	7.6795	2.941	0.0020511	2.688	1.62931	0.401484				1	red
3.705_171.0893	7.244	2.8568	0.0087154	2.0597	1.52632	0.634648	Butyryl-l-homoserine lactone	C11837		1	red
4.307_145.0737	0.41173	-1.2802	0.047199	1.3261	1.24348	1.12886	N-isobutyrylglycine		HMDB0000730	-1	blue
4.588_433.2566	2.3677	1.2435	0.030775	1.5118	1.395	0.377327	Methyl n-formylnorleucylleucylphenylalaninate	C11298		1	red
4.724_299.115	0.25604	-1.9655	0.037952	1.4208	1.29971	0.905586	Mfcd24849356		HMDB0033026	-1	blue
4.76_136.0383	0.0070474	-7.1487	0.020418	1.69	1.36022	0.252316	Hypoxanthine	C00262	HMDB0000157	-1	blue
5.061_246.019	0.036593	-4.7723	0.041437	1.3826	1.27122	1.05262	3-(sulfooxy)benzenepropanoic acid		HMDB0094710	-1	blue
5.074_265.1306	0.18189	-2.4588	0.03205	1.4942	1.31605	1.00726	N-(2,6-dimethylphenyl)-n-(methoxyacetyl) alanine			-1	blue
5.686_210.9558	3.5336	1.8211	0.048545	1.3139	1.10732	0.873194				1	red
6.535_181.0737	2.3654	1.2421	0.035408	1.4509	1.39181	0.206435	L-tyrosine	C00082	HMDB0000158	1	red
6.547_207.035	0.24359	-2.0375	0.035915	1.4447	1.3184	0.999631				-1	blue
6.582_220.0552	0.02528	-5.3059	0.00019471	3.7106	1.6496	0.423102	5-(2-thienyl)-3,4,7,7a-tetrahydrocyclopenta[b]pyran-6(2h)-one		HMDB0035149	-1	blue
7.005_237.0104	0.022945	-5.4457	0.011597	1.9357	1.42961	0.778076				-1	blue
7.007_152.0331	0.020563	-5.6038	0.010086	1.9963	1.44319	0.790607	Xanthine	C00385	HMDB0000292	-1	blue
7.637_255.9881	0.032999	-4.9214	0.0045476	2.3422	1.52046	0.686583	L-ascorbic acid 2-sulfate			-1	blue
7.642_200.0654	0.018295	-5.7724	0.00026583	3.5754	1.63448	0.52359				-1	blue
7.643_157.0598	0.019208	-5.7022	0.00017386	3.7598	1.6684	0.441829				-1	blue
7.825_257.0253	3.0198	1.5944	0.047651	1.3219	1.26032	0.134814				1	red
8.052_197.0321	3.4639	1.7924	0.0045833	2.3388	1.62056	0.182898	4-hydroxy-3-nitrophenylacetic acid		HMDB0062403	1	red
8.553_188.1046	3.0653	1.616	0.045796	1.3392	1.22948	0.823277	Azelaic acid	C08261	HMDB0000784	1	red
