# Supplementary material for: The Protective Effects of L-Theanine against Epigallocatechin Gallate-Induced Acute Liver Injury in Mice
Source: Foods. 2024 Apr 7;13(7):1121. doi: 10.3390/foods13071121 (PMC11011850; doi:10.3390/foods13071121)
Supplement: Supplementary file 1 [file foods-13-01121-s001.zip › Table S6 Intersection.xlsx]

## Sheet: inter
ID	Compound Name	KEGG.ID	HMDB.ID	log2.FC.EGCG-Con	significance.EGCG-Con	log2.FC.LT+EGCG-EGCG	significance.LT+EGCG-EGCG
0.655_427.2205				-1.6429	-1	2.5803	1
0.658_405.2364				-1.3708	-1	1.5541	1
0.659_403.2207				-1.2083	-1	2.3392	1
0.662_379.2207				-1.4461	-1	1.9794	1
0.681_609.5115				-1.3355	-1	1.7104	1
0.689_453.3823				1.3665	1	1.8214	1
0.693_408.3241	2-{[(hexadecyloxy)(hydroxy)phosphoryl]oxy}-n,n,n-trimethylethanaminium			1.0529	1	1.8023	1
0.707_160.0891	2-phenyl-4-pentenal		HMDB0035207	-1.375	-1	1.078	1
0.716_316.24	Pregnane-3,20-dione			-1.4305	-1	1.5631	1
0.719_401.3288				2.5718	1	-2.4474	-1
0.72_279.0071				2.5475	1	-3.1957	-1
0.721_189.0092	Lanthionine ketimine		HMDB0004823	3.6954	1	-5.566	-1
0.721_423.3127	(5z,8z,11z,14z)-n-(2-phenoxyethyl)-5,8,11,14-icosatetraenamide			2.5757	1	-1.9299	-1
0.723_260.1768	1,9-heptadecadien-4,6-diyn-3,8-diol			2.2976	1	-1.3937	-1
0.723_375.313	Docosatetraenoylethanolamide	C13829	HMDB0013626	2.6935	1	-2.1409	-1
0.723_399.3129				2.51	1	-2.3246	-1
0.725_480.3802				-1.0307	-1	1.0653	1
0.731_246.1619	Geroquinol	C10793		-1.7491	-1	1.0148	1
0.732_401.3315				4.7588	1	-2.6466	-1
0.733_401.3297				4.6632	1	-2.671	-1
0.733_423.3136	(5z,8z,11z,14z)-n-(2-phenoxyethyl)-5,8,11,14-icosatetraenamide			4.7546	1	-2.6455	-1
0.734_452.3132				1.8944	1	-1.8506	-1
0.735_450.2982				1.3174	1	-1.0397	-1
0.737_375.3134	Docosatetraenoylethanolamide	C13829	HMDB0013626	4.4471	1	-2.0381	-1
0.737_399.3134				5.5282	1	-2.7333	-1
0.738_378.2036	Mfcd00273304	C15291		-1.0643	-1	1.5782	1
0.738_420.3098				2.3777	1	-1.8514	-1
0.739_414.2526				1.521	1	-1.2728	-1
0.742_282.1247	Erteberel			2.3391	1	-2.2956	-1
0.742_347.2817	Anandamide	C11695	HMDB0004080	-1.4738	-1	2.1948	1
0.742_373.2978	(5z,8z,11z,14z)-1-(4-morpholinyl)-5,8,11,14-icosatetraen-1-one			2.0136	1	-1.7182	-1
0.743_390.2529				1.4369	1	-1.7095	-1
0.744_410.2771				-2.2794	-1	2.8316	1
0.748_323.2818	Mfcd00674434		HMDB0012252	-1.025	-1	1.7893	1
0.748_393.2872				-1.4454	-1	2.1532	1
0.753_230.1148				-1.9791	-1	2.0995	1
0.755_345.2873				-1.0428	-1	1.296	1
0.765_212.1045	Guaietolin			-2.2176	-1	1.8266	1
0.766_477.1985				-1.514	-1	1.0904	1
0.77_218.0242	4-(2-hydroxyethyl)phenyl hydrogen sulfate		HMDB0041785	2.5495	1	-3.5742	-1
0.775_379.1412	Angoline	C09336		2.2794	1	-2.6061	-1
0.779_396.2141	6737			-1.46	-1	1.8096	1
0.783_323.2823	Linoleoyl ethanolamide		HMDB0012252	-1.0368	-1	1.7796	1
0.783_462.2086	Patrinoside	C11640		-3.2688	-1	2.7504	1
0.783_479.199				-2.7263	-1	2.0554	1
0.786_159.0682	Indole-3-acetaldehyde	C00637	HMDB0001190	-1.6258	-1	1.045	1
0.789_254.0936	Ketoprofen	C01716	HMDB0015144	2.9786	1	-2.1613	-1
0.792_425.3288				-2.2154	-1	2.4269	1
0.794_284.104	Caffeic acid phenethyl ester	C10484		1.5893	1	-1.4085	-1
0.796_331.214	Megastachine	C09888		2.475	1	-2.1178	-1
0.804_325.1307	(s)-(+)-bulbocapnine	C09367		3.4286	1	-2.8305	-1
0.807_317.1984	(+/-)-tetrabenazine	C11168	HMDB0015592	3.0464	1	-2.3504	-1
0.809_180.0784	Propylparaben	D01422	HMDB0032574	1.8905	1	-2.74	-1
0.81_341.2929	N-acetylsphingosine			-1.0112	-1	1.6832	1
0.829_391.2357	2172			-3.3998	-1	2.7832	1
0.832_367.2355				-1.4679	-1	2.3601	1
0.833_214.1207	5-hexyl-2-oxotetrahydro-3-furancarboxylic acid		HMDB0030984	-2.2903	-1	2.5536	1
0.838_289.1669	Atropine	C01479	HMDB0014712	3.2504	1	-2.7547	-1
0.844_240.0779	3-hydroxyflavanone	C15570		3.3585	1	-2.4611	-1
0.846_170.1308	2361		HMDB0037116	-1.0426	-1	1.2346	1
0.847_401.2229				-1.496	-1	2.2316	1
0.849_137.0479	4-aminobenzoate	C00568	HMDB0001392	-4.3346	-1	2.566	1
0.851_168.0784	Dc2810000		HMDB0059963	-2.3233	-1	1.1759	1
0.852_277.1094	At6200000			4.0181	1	-2.3884	-1
0.854_365.1626	Nequinate		HMDB0031754	5.511	1	-3.0435	-1
0.856_120.094	Cumene	C14396	HMDB0034029	-1.1625	-1	1.4311	1
0.856_364.1886	4beta-phorbol	C09155		-1.859	-1	2.6907	1
0.857_397.1523	(+)-aureothin	C15689		7.6557	1	-2.9156	-1
0.858_108.0576	P-cresol	C01468	HMDB0001858	-1.7952	-1	1.8735	1
0.859_399.1469				7.8885	1	-3.3671	-1
0.86_351.147	Zindoxifene	C14745		6.3579	1	-2.8583	-1
0.864_122.1097	3-allylcyclohexene		HMDB0061784	-1.9141	-1	1.1053	1
0.864_319.1418	Proquinolate			5.9401	1	-2.7918	-1
0.865_288.1143	R-soterenol	C11769		1.6526	1	-1.399	-1
0.865_366.2042	Dibutoxyethylphthalate	C15438		-1.3035	-1	2.2061	1
0.867_383.119				5.82	1	-2.7035	-1
0.868_318.1367	[similar to: prostaglandin d1; δmass: -36.1040 da]			5.7943	1	-1.6522	-1
0.87_205.0734	5-methoxyindoleacetic acid	C05660	HMDB0004096	1.9639	1	-2.4604	-1
0.87_313.2406				-1.4623	-1	1.3616	1
0.87_413.2619				-1.1213	-1	1.1829	1
0.87_438.1579				7.3654	1	-3.0613	-1
0.871_411.2443				-1.4374	-1	1.4806	1
0.872_435.2446				-1.108	-1	1.3123	1
0.873_263.0938	?-naphthyl anthranilate		HMDB0039873	2.3719	1	-2.6782	-1
0.873_425.3289				-1.4019	-1	2.0453	1
0.874_179.0943	Phenacetin	C07591		1.3654	1	-1.257	-1
0.874_363.2442	N-palmitoyl taurine			-1.1665	-1	1.1482	1
0.879_161.0838	3-(2-hydroxyethyl)indole	C00955	HMDB0003447	1.2167	1	-1.1537	-1
0.882_261.1153				5.5126	1	-2.8516	-1
0.885_108.094	4-vinylcyclohexene	C19310		-1.4753	-1	1.8174	1
0.888_206.0574	Scoparone	C09311	HMDB0030818	1.2778	1	-2.5087	-1
0.889_270.0884	Imperatorin	C09269	HMDB0034376	2.3935	1	-2.5643	-1
0.894_277.095				3.5184	1	-1.7036	-1
0.913_179.0949	Salsolinol	C09642	HMDB0042012	2.8975	1	-1.4276	-1
0.923_261.1002				2.7538	1	-1.5945	-1
0.94_353.1262	Protopine	C05189	HMDB0003920	6.1274	1	-2.6136	-1
0.953_284.0684	Olmelin	C00814	HMDB0002338	3.2594	1	-2.5317	-1
0.954_266.0579	Phenanthrene-4,5-dicarboxylate	C18252		5.6908	1	-2.8095	-1
0.956_403.142				5.9336	1	-3.1605	-1
0.958_263.0946	?-naphthyl anthranilate		HMDB0039873	6.1302	1	-2.4079	-1
1.002_122.0366	4-hydroxybenzaldehyde	C00633	HMDB0011718	1.8005	1	-1.794	-1
1.036_397.1678				6.9989	1	-2.7855	-1
1.042_166.0627	3-(4-hydroxyphenyl)propionic acid	C01744	HMDB0002199	3.778	1	-3.2543	-1
1.047_268.2031				2.0165	1	-1.5766	-1
1.075_391.1784	S-hexyl-glutathione	C02886		8.0178	1	-2.9793	-1
1.077_425.1629	Domperidone		HMDB0015315	9.044	1	-2.4875	-1
1.079_378.1664	Cnicin	C09362		3.9919	1	-2.5263	-1
1.083_365.1617	Nequinate		HMDB0031754	1.3339	1	-2.8291	-1
1.097_377.1627				7.7878	1	-2.7874	-1
1.099_409.1349				5.9452	1	-2.8228	-1
1.103_265.0731	Oxycinchophen			1.7007	1	-2.7592	-1
1.122_298.0945	Amlexanox		HMDB0015160	1.0719	1	-1.983	-1
1.123_431.1358	Tiodazosin			2.8023	1	-3.3663	-1
1.132_243.0561				2.9575	1	-2.5017	-1
1.137_277.1103	At6200000			7.9372	1	-2.1698	-1
1.14_399.1461	S-(5'-adenosyl)-l-methionine conjugate acid		HMDB0001185	2.9198	1	-3.3413	-1
1.143_426.1663	Mangostanol		HMDB0029868	8.4138	1	-4.98	-1
1.154_237.1731	4808			-2.0592	-1	1.6821	1
1.164_179.0949	Phenacetin	C07591		2.2769	1	-1.9344	-1
1.166_334.1157				2.3964	1	-3.6753	-1
1.168_271.12	7,8-didehydro-4,5-epoxymorphinan-3,6-diol			2.1046	1	-3.0862	-1
1.169_385.0984				5.3024	1	-2.3319	-1
1.217_863.606				2.2874	1	-2.512	-1
1.231_839.6058				2.802	1	-3.1812	-1
1.233_464.174				7.154	1	-1.9816	-1
1.236_837.5911				3.6045	1	-4.1933	-1
1.237_335.1157	Berberine	C00757	HMDB0003409	6.6331	1	-2.2819	-1
1.262_222.1007	Gly-phe		HMDB0028848	5.6186	1	-1.3206	-1
1.289_815.6043				3.0556	1	-3.8085	-1
1.296_351.1464	Zindoxifene	C14745		1.9233	1	-3.3545	-1
1.324_787.574				3.6475	1	-3.8589	-1
1.367_475.3247				1.8171	1	-2.1284	-1
1.374_383.1184				4.1519	1	-4.0399	-1
1.433_232.073	2-methyl-5-acetonyl-7-hydroxychromone		HMDB0030813	2.543	1	-2.4553	-1
1.467_320.1114				2.3162	1	-1.395	-1
1.47_383.1069	Succinyladenosine		HMDB0000912	2.8879	1	-2.1266	-1
1.585_196.0845	5-nitro-2-propoxyaniline		HMDB0037688	2.5071	1	-1.9374	-1
1.641_214.1201	5-hexyl-2-oxotetrahydro-3-furancarboxylic acid		HMDB0030984	-1.7772	-1	1.2255	1
1.808_350.2089	(-)-andrographolide	C20214		-1.3331	-1	4.1724	1
1.892_266.087				1.4604	1	-2.5267	-1
10.424_203.0038				1.5387	1	-1.4966	-1
10.43_118.0265	Succinic acid	C00042	HMDB0000254	1.4858	1	-1.4464	-1
13.421_273.1802	Val-arg			3.9754	1	-4.3409	-1
13.44_102.1158	Cadaverine	C01672	HMDB0002322	10.676	1	-7.9262	-1
2.003_200.0657				1.8645	1	-2.0793	-1
2.004_217.0557				1.9349	1	-2.0788	-1
2.026_154.0628	Vanillyl alcohol	C06317	HMDB0032012	-1.6605	-1	2.2318	1
2.092_137.0475	Anthranilate	C00108	HMDB0001123	-2.7568	-1	2.6334	1
2.093_205.0347				-3.2466	-1	2.9628	1
2.132_566.3195				-1.4993	-1	1.8646	1
2.142_400.1837				-1.6316	-1	1.7431	1
2.177_248.1154	6-hydroxymelatonin	C05643	HMDB0004081	1.2721	1	-1.656	-1
2.235_396.2982				1.7319	1	-2.0019	-1
2.266_270.052	Genistein	C06563	HMDB0003217	1.4266	1	-2.1573	-1
2.296_394.2825				1.9039	1	-1.5498	-1
2.299_457.2779				1.6824	1	-1.6528	-1
2.323_463.3051				1.9619	1	-2.1225	-1
2.357_195.0562				2.2383	1	-2.2941	-1
2.361_370.2825				1.8182	1	-1.7976	-1
2.362_433.278				1.5385	1	-1.9015	-1
2.377_150.0348	2-hydroxy-4-(methylthio)butyric acid			2.8162	1	-1.8702	-1
2.39_391.072				2.046	1	-2.465	-1
2.44_380.1691				1.1448	1	-1.4379	-1
2.515_347.1879	3,8-dimethyl-3-(4-methyl-3-penten-1-yl)-3,11-dihydropyrano[3,2-a]carbazol-9-ol		HMDB0038828	3.7517	1	-2.625	-1
2.559_314.2086				-1.2738	-1	1.3974	1
2.592_586.2624				1.1817	1	-1.0439	-1
2.629_293.1046	Oxaprozin	C07356	HMDB0015126	4.0102	1	-2.3296	-1
2.634_381.1721	Xaliproden			3.7957	1	-2.3743	-1
2.636_425.1619	Domperidone		HMDB0015315	3.8665	1	-2.4181	-1
2.638_113.0588	Creatinine	C00791	HMDB0000562	2.7948	1	-3.312	-1
2.743_333.1723	Enpromate			3.6324	1	-2.3341	-1
2.784_449.2252				-1.1512	-1	1.7527	1
2.786_386.2298	Oleandolide	C11990		-1.0326	-1	1.8166	1
2.925_246.0845	Dihydrouridine		HMDB0000497	-1.1451	-1	1.0153	1
2.925_397.1669				4.4085	1	-2.4259	-1
2_132.0785	6-hydroxycaproic acid	C06103	HMDB0012843	1.5711	1	-1.7858	-1
3.029_205.0734	Cinnamoylglycine		HMDB0011621	2.3221	1	-5.1392	-1
3.03_435.2096	Trimazosin			-1.3325	-1	1.8022	1
3.081_239.0611	N-acetyl(phenyl)cysteine		HMDB0042011	2.8078	1	-2.2494	-1
3.103_302.1009	Terizidone			4.5674	1	-3.7583	-1
3.109_319.1275				4.2468	1	-3.5195	-1
3.126_193.0736	Phenylacetylglycine	C05598	HMDB0000821	3.4181	1	-5.0191	-1
3.246_397.1679				9.2533	1	-2.5455	-1
3.267_398.1712	N-benzoyl-d-arginine-4-nitroanilide	C04303		8.6844	1	-2.4703	-1
3.278_385.0976				3.3497	1	-1.5349	-1
3.366_438.2972				-1.0068	-1	1.0938	1
3.438_383.1522	Meropenem		HMDB0014898	7.2148	1	-2.7655	-1
3.644_232.0842	Phenobarbital	C07434	HMDB0015305	2.8476	1	-3.0094	-1
3.929_464.1741				7.7352	1	-2.4793	-1
4.25_463.3068				1.6765	1	-1.8143	-1
4.307_145.0737	N-isobutyrylglycine		HMDB0000730	-1.1708	-1	-1.2802	-1
4.588_433.2566	Methyl n-formylnorleucylleucylphenylalaninate	C11298		-1.8013	-1	1.2435	1
4.76_136.0383	Hypoxanthine	C00262	HMDB0000157	6.1036	1	-7.1487	-1
5.22_407.1367	(1,2-dimethoxy-12-methyl-12,13-dihydro[1,3]benzodioxolo[5,6-c]phenanthridin-13-yl)acetic acid		HMDB0029832	5.8207	1	-2.3512	-1
6.547_207.035				1.2591	1	-2.0375	-1
6.582_220.0552	5-(2-thienyl)-3,4,7,7a-tetrahydrocyclopenta[b]pyran-6(2h)-one		HMDB0035149	4.9088	1	-5.3059	-1
7.005_237.0104				3.9522	1	-5.4457	-1
7.007_152.0331	Xanthine	C00385	HMDB0000292	4.0723	1	-5.6038	-1
7.132_574.3985				6.1025	1	-2.1125	-1
7.15_381.1722	Xaliproden			-3.0535	-1	1.4315	1
7.255_281.1263	Trimetozine			4.2842	1	-2.0845	-1
7.268_403.1542	Amibegron			-4.4237	-1	2.0789	1
7.272_299.1369				4.4561	1	-2.1099	-1
7.637_255.9881	L-ascorbic acid 2-sulfate			3.4367	1	-4.9214	-1
7.642_200.0654				5.0457	1	-5.7724	-1
7.643_157.0598				4.9316	1	-5.7022	-1
8.052_197.0321	4-hydroxy-3-nitrophenylacetic acid		HMDB0062403	-2.4867	-1	1.7924	1

## Sheet: with_name
ID	Compound Name	KEGG.ID	HMDB.ID	log2.FC.EGCG-Con	significance.EGCG-Con	log2.FC.LT+EGCG-EGCG	significance.LT+EGCG-EGCG
0.693_408.3241	2-{[(hexadecyloxy)(hydroxy)phosphoryl]oxy}-n,n,n-trimethylethanaminium			1.0529	1	1.8023	1
0.707_160.0891	2-phenyl-4-pentenal		HMDB0035207	-1.375	-1	1.078	1
0.716_316.24	Pregnane-3,20-dione			-1.4305	-1	1.5631	1
0.721_189.0092	Lanthionine ketimine		HMDB0004823	3.6954	1	-5.566	-1
0.721_423.3127	(5z,8z,11z,14z)-n-(2-phenoxyethyl)-5,8,11,14-icosatetraenamide			2.5757	1	-1.9299	-1
0.723_260.1768	1,9-heptadecadien-4,6-diyn-3,8-diol			2.2976	1	-1.3937	-1
0.723_375.313	Docosatetraenoylethanolamide	C13829	HMDB0013626	2.6935	1	-2.1409	-1
0.731_246.1619	Geroquinol	C10793		-1.7491	-1	1.0148	1
0.733_423.3136	(5z,8z,11z,14z)-n-(2-phenoxyethyl)-5,8,11,14-icosatetraenamide			4.7546	1	-2.6455	-1
0.737_375.3134	Docosatetraenoylethanolamide	C13829	HMDB0013626	4.4471	1	-2.0381	-1
0.738_378.2036	Mfcd00273304	C15291		-1.0643	-1	1.5782	1
0.742_282.1247	Erteberel			2.3391	1	-2.2956	-1
0.742_347.2817	Anandamide	C11695	HMDB0004080	-1.4738	-1	2.1948	1
0.742_373.2978	(5z,8z,11z,14z)-1-(4-morpholinyl)-5,8,11,14-icosatetraen-1-one			2.0136	1	-1.7182	-1
0.748_323.2818	Mfcd00674434		HMDB0012252	-1.025	-1	1.7893	1
0.765_212.1045	Guaietolin			-2.2176	-1	1.8266	1
0.77_218.0242	4-(2-hydroxyethyl)phenyl hydrogen sulfate		HMDB0041785	2.5495	1	-3.5742	-1
0.775_379.1412	Angoline	C09336		2.2794	1	-2.6061	-1
0.779_396.2141	6737			-1.46	-1	1.8096	1
0.783_323.2823	Linoleoyl ethanolamide		HMDB0012252	-1.0368	-1	1.7796	1
0.783_462.2086	Patrinoside	C11640		-3.2688	-1	2.7504	1
0.786_159.0682	Indole-3-acetaldehyde	C00637	HMDB0001190	-1.6258	-1	1.045	1
0.789_254.0936	Ketoprofen	C01716	HMDB0015144	2.9786	1	-2.1613	-1
0.794_284.104	Caffeic acid phenethyl ester	C10484		1.5893	1	-1.4085	-1
0.796_331.214	Megastachine	C09888		2.475	1	-2.1178	-1
0.804_325.1307	(s)-(+)-bulbocapnine	C09367		3.4286	1	-2.8305	-1
0.807_317.1984	(+/-)-tetrabenazine	C11168	HMDB0015592	3.0464	1	-2.3504	-1
0.809_180.0784	Propylparaben	D01422	HMDB0032574	1.8905	1	-2.74	-1
0.81_341.2929	N-acetylsphingosine			-1.0112	-1	1.6832	1
0.829_391.2357	2172			-3.3998	-1	2.7832	1
0.833_214.1207	5-hexyl-2-oxotetrahydro-3-furancarboxylic acid		HMDB0030984	-2.2903	-1	2.5536	1
0.838_289.1669	Atropine	C01479	HMDB0014712	3.2504	1	-2.7547	-1
0.844_240.0779	3-hydroxyflavanone	C15570		3.3585	1	-2.4611	-1
0.846_170.1308	2361		HMDB0037116	-1.0426	-1	1.2346	1
0.849_137.0479	4-aminobenzoate	C00568	HMDB0001392	-4.3346	-1	2.566	1
0.851_168.0784	Dc2810000		HMDB0059963	-2.3233	-1	1.1759	1
0.852_277.1094	At6200000			4.0181	1	-2.3884	-1
0.854_365.1626	Nequinate		HMDB0031754	5.511	1	-3.0435	-1
0.856_120.094	Cumene	C14396	HMDB0034029	-1.1625	-1	1.4311	1
0.856_364.1886	4beta-phorbol	C09155		-1.859	-1	2.6907	1
0.857_397.1523	(+)-aureothin	C15689		7.6557	1	-2.9156	-1
0.858_108.0576	P-cresol	C01468	HMDB0001858	-1.7952	-1	1.8735	1
0.86_351.147	Zindoxifene	C14745		6.3579	1	-2.8583	-1
0.864_122.1097	3-allylcyclohexene		HMDB0061784	-1.9141	-1	1.1053	1
0.864_319.1418	Proquinolate			5.9401	1	-2.7918	-1
0.865_288.1143	R-soterenol	C11769		1.6526	1	-1.399	-1
0.865_366.2042	Dibutoxyethylphthalate	C15438		-1.3035	-1	2.2061	1
0.868_318.1367	[similar to: prostaglandin d1; δmass: -36.1040 da]			5.7943	1	-1.6522	-1
0.87_205.0734	5-methoxyindoleacetic acid	C05660	HMDB0004096	1.9639	1	-2.4604	-1
0.873_263.0938	?-naphthyl anthranilate		HMDB0039873	2.3719	1	-2.6782	-1
0.874_179.0943	Phenacetin	C07591		1.3654	1	-1.257	-1
0.874_363.2442	N-palmitoyl taurine			-1.1665	-1	1.1482	1
0.879_161.0838	3-(2-hydroxyethyl)indole	C00955	HMDB0003447	1.2167	1	-1.1537	-1
0.885_108.094	4-vinylcyclohexene	C19310		-1.4753	-1	1.8174	1
0.888_206.0574	Scoparone	C09311	HMDB0030818	1.2778	1	-2.5087	-1
0.889_270.0884	Imperatorin	C09269	HMDB0034376	2.3935	1	-2.5643	-1
0.913_179.0949	Salsolinol	C09642	HMDB0042012	2.8975	1	-1.4276	-1
0.94_353.1262	Protopine	C05189	HMDB0003920	6.1274	1	-2.6136	-1
0.953_284.0684	Olmelin	C00814	HMDB0002338	3.2594	1	-2.5317	-1
0.954_266.0579	Phenanthrene-4,5-dicarboxylate	C18252		5.6908	1	-2.8095	-1
0.958_263.0946	?-naphthyl anthranilate		HMDB0039873	6.1302	1	-2.4079	-1
1.002_122.0366	4-hydroxybenzaldehyde	C00633	HMDB0011718	1.8005	1	-1.794	-1
1.042_166.0627	3-(4-hydroxyphenyl)propionic acid	C01744	HMDB0002199	3.778	1	-3.2543	-1
1.075_391.1784	S-hexyl-glutathione	C02886		8.0178	1	-2.9793	-1
1.077_425.1629	Domperidone		HMDB0015315	9.044	1	-2.4875	-1
1.079_378.1664	Cnicin	C09362		3.9919	1	-2.5263	-1
1.083_365.1617	Nequinate		HMDB0031754	1.3339	1	-2.8291	-1
1.103_265.0731	Oxycinchophen			1.7007	1	-2.7592	-1
1.122_298.0945	Amlexanox		HMDB0015160	1.0719	1	-1.983	-1
1.123_431.1358	Tiodazosin			2.8023	1	-3.3663	-1
1.137_277.1103	At6200000			7.9372	1	-2.1698	-1
1.14_399.1461	S-(5'-adenosyl)-l-methionine conjugate acid		HMDB0001185	2.9198	1	-3.3413	-1
1.143_426.1663	Mangostanol		HMDB0029868	8.4138	1	-4.98	-1
1.154_237.1731	4808			-2.0592	-1	1.6821	1
1.164_179.0949	Phenacetin	C07591		2.2769	1	-1.9344	-1
1.168_271.12	7,8-didehydro-4,5-epoxymorphinan-3,6-diol			2.1046	1	-3.0862	-1
1.237_335.1157	Berberine	C00757	HMDB0003409	6.6331	1	-2.2819	-1
1.262_222.1007	Gly-phe		HMDB0028848	5.6186	1	-1.3206	-1
1.296_351.1464	Zindoxifene	C14745		1.9233	1	-3.3545	-1
1.433_232.073	2-methyl-5-acetonyl-7-hydroxychromone		HMDB0030813	2.543	1	-2.4553	-1
1.47_383.1069	Succinyladenosine		HMDB0000912	2.8879	1	-2.1266	-1
1.585_196.0845	5-nitro-2-propoxyaniline		HMDB0037688	2.5071	1	-1.9374	-1
1.641_214.1201	5-hexyl-2-oxotetrahydro-3-furancarboxylic acid		HMDB0030984	-1.7772	-1	1.2255	1
1.808_350.2089	(-)-andrographolide	C20214		-1.3331	-1	4.1724	1
10.43_118.0265	Succinic acid	C00042	HMDB0000254	1.4858	1	-1.4464	-1
13.421_273.1802	Val-arg			3.9754	1	-4.3409	-1
13.44_102.1158	Cadaverine	C01672	HMDB0002322	10.676	1	-7.9262	-1
2.026_154.0628	Vanillyl alcohol	C06317	HMDB0032012	-1.6605	-1	2.2318	1
2.092_137.0475	Anthranilate	C00108	HMDB0001123	-2.7568	-1	2.6334	1
2.177_248.1154	6-hydroxymelatonin	C05643	HMDB0004081	1.2721	1	-1.656	-1
2.266_270.052	Genistein	C06563	HMDB0003217	1.4266	1	-2.1573	-1
2.377_150.0348	2-hydroxy-4-(methylthio)butyric acid			2.8162	1	-1.8702	-1
2.515_347.1879	3,8-dimethyl-3-(4-methyl-3-penten-1-yl)-3,11-dihydropyrano[3,2-a]carbazol-9-ol		HMDB0038828	3.7517	1	-2.625	-1
2.629_293.1046	Oxaprozin	C07356	HMDB0015126	4.0102	1	-2.3296	-1
2.634_381.1721	Xaliproden			3.7957	1	-2.3743	-1
2.636_425.1619	Domperidone		HMDB0015315	3.8665	1	-2.4181	-1
2.638_113.0588	Creatinine	C00791	HMDB0000562	2.7948	1	-3.312	-1
2.743_333.1723	Enpromate			3.6324	1	-2.3341	-1
2.786_386.2298	Oleandolide	C11990		-1.0326	-1	1.8166	1
2.925_246.0845	Dihydrouridine		HMDB0000497	-1.1451	-1	1.0153	1
2_132.0785	6-hydroxycaproic acid	C06103	HMDB0012843	1.5711	1	-1.7858	-1
3.029_205.0734	Cinnamoylglycine		HMDB0011621	2.3221	1	-5.1392	-1
3.03_435.2096	Trimazosin			-1.3325	-1	1.8022	1
3.081_239.0611	N-acetyl(phenyl)cysteine		HMDB0042011	2.8078	1	-2.2494	-1
3.103_302.1009	Terizidone			4.5674	1	-3.7583	-1
3.126_193.0736	Phenylacetylglycine	C05598	HMDB0000821	3.4181	1	-5.0191	-1
3.267_398.1712	N-benzoyl-d-arginine-4-nitroanilide	C04303		8.6844	1	-2.4703	-1
3.438_383.1522	Meropenem		HMDB0014898	7.2148	1	-2.7655	-1
3.644_232.0842	Phenobarbital	C07434	HMDB0015305	2.8476	1	-3.0094	-1
4.307_145.0737	N-isobutyrylglycine		HMDB0000730	-1.1708	-1	-1.2802	-1
4.588_433.2566	Methyl n-formylnorleucylleucylphenylalaninate	C11298		-1.8013	-1	1.2435	1
4.76_136.0383	Hypoxanthine	C00262	HMDB0000157	6.1036	1	-7.1487	-1
5.22_407.1367	(1,2-dimethoxy-12-methyl-12,13-dihydro[1,3]benzodioxolo[5,6-c]phenanthridin-13-yl)acetic acid		HMDB0029832	5.8207	1	-2.3512	-1
6.582_220.0552	5-(2-thienyl)-3,4,7,7a-tetrahydrocyclopenta[b]pyran-6(2h)-one		HMDB0035149	4.9088	1	-5.3059	-1
7.007_152.0331	Xanthine	C00385	HMDB0000292	4.0723	1	-5.6038	-1
7.15_381.1722	Xaliproden			-3.0535	-1	1.4315	1
7.255_281.1263	Trimetozine			4.2842	1	-2.0845	-1
7.268_403.1542	Amibegron			-4.4237	-1	2.0789	1
7.637_255.9881	L-ascorbic acid 2-sulfate			3.4367	1	-4.9214	-1
8.052_197.0321	4-hydroxy-3-nitrophenylacetic acid		HMDB0062403	-2.4867	-1	1.7924	1
