# Supplementary figures and images for: The Protective Effects of L-Theanine against Epigallocatechin Gallate-Induced Acute Liver Injury in Mice
Source: MDPI journal article supplement (doi:10.3390/foods13071121), 2024-04-07

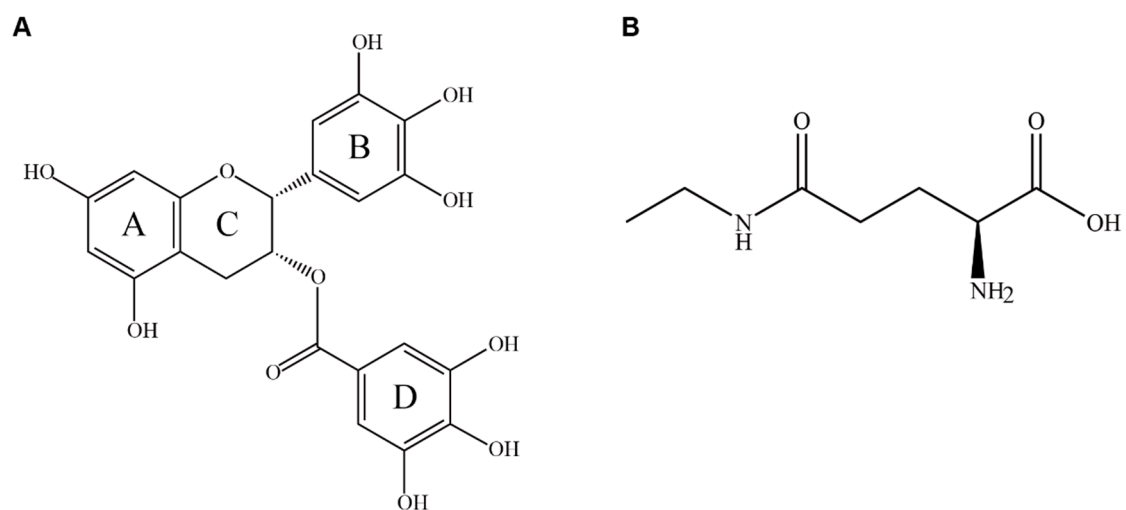

**Figure S1.** Chemical structure of epigallocatechin-3-gallate (A) and L-theanine (B)

Supplement: s1 [file s1]
